# Supplementary material for: Analysis of the Role of FRMD5 in the Biology of Papillary Thyroid Carcinoma
Source: MDPI journal article supplement (doi:10.3390/ijms22136726), 2021-06-23
Supplement: s1 [file s1]

Supplementary Table S3. Genes upregulated in BCPAP siFRMD5 (in comparison with BCPAP siNEG).

| gene     | BCPAP siNEG<br>1 | BCPAP siNEG<br>2 | BCPAP siNEG<br>3 | BCPAP siFRMD5 1 | BCPAP siFRMD5 2 | BCPAP siFRMD5 3 | baseMean    | log2FoldChange | lfcSE        | stat        | pvalue      | padj        | Fold-change |
|----------|------------------|------------------|------------------|-----------------|-----------------|-----------------|-------------|----------------|--------------|-------------|-------------|-------------|-------------|
| CXCL5    | 1341,291084      | 1175,972462      | 1045,282048      | 5155,835281     | 4958,072347     | 5102,272896     | 1564,995775 | 2,093973747    | 0,167222623  | 12,52207215 | 5,65395E-36 | 7,28116E-32 | 4,269223664 |
| WWC1     | 108,0328593      | 76,75803521      | 96,48757365      | 467,9286856     | 443,5508402     | 421,9857731     | 553,6319914 | 2,255069318    | 0,186197241  | 12,11118546 | 9,21526E-34 | 5,93371E-30 | 4,773572324 |
| CLDN12   | 91,19656951      | 64,45706803      | 105,5332837      | 391,5824264     | 404,0442876     | 342,4164218     | 228,1662748 | 2,143539872    | 0,206263465  | 10,39224215 | 2,68955E-25 | 8,659E-22   | 4,418448511 |
| CTGF     | 828,4857584      | 1006,219115      | 891,5049774      | 2471,402295     | 2349,742001     | 2980,721541     | 1418,614786 | 1,515825129    | 0,148318501  | 10,22006777 | 1,61228E-24 | 4,15259E-21 | 2,859623333 |
| ESM1     | 332,5167227      | 251,9238079      | 343,7369811      | 1321,282841     | 1142,09852      | 1234,666001     | 388,1158562 | 1,998138281    | 0,206926749  | 9,656258973 | 4,62444E-22 | 9,92558E-19 | 3,994841548 |
| KRTAP2-3 | 118,5555404      | 227,8139122      | 161,8177016      | 757,3056359     | 728,1775939     | 775,1306468     | 388,8171107 | 2,147195154    | 0,232842017  | 9,221682506 | 2,92474E-20 | 5,38069E-17 | 4,429657499 |
| LRRC38   | 58,22550207      | 55,60037166      | 57,28949685      | 224,1132126     | 280,1373727     | 246,7543927     | 76,84336239 | 2,133552491    | 0,235909789  | 9,043933705 | 1,51133E-19 | 2,16254E-16 | 4,387966438 |
| HIPK2    | 342,3378917      | 388,7105629      | 444,2448703      | 1043,604108     | 1048,719395     | 963,772592      | 1419,56532  | 1,381486993    | 0,16056573   | 8,603872023 | 7,70709E-18 | 9,92519E-15 | 2,605367694 |
| PDGFB    | 14,03024146      | 14,26912193      | 16,08126228      | 125,6019104     | 120,3154101     | 89,40376549     | 32,14058703 | 2,929371145    | 0,34461508   | 8,500414852 | 1,88914E-17 | 2,21167E-14 | 7,617782754 |
| RASA2    | 65,24062281      | 76,26599652      | 44,22347126      | 223,4975169     | 226,2648011     | 297,7145391     | 152,1862722 | 1,984347684    | 0,234549452  | 8,460252908 | 2,66798E-17 | 2,86319E-14 | 3,956837133 |
| EIF5A2   | 105,226811       | 111,692782       | 101,5129681      | 331,8599494     | 266,6692298     | 309,3370286     | 231,7421017 | 1,509300655    | 0,180906416  | 8,342991311 | 7,24345E-17 | 7,17547E-14 | 2,846720111 |
| ZNF460   | 199,2294288      | 185,4985851      | 225,1376719      | 547,353423      | 522,5639453     | 487,2505219     | 302,5544539 | 1,358966702    | 0,164300435  | 8,271230102 | 1,32584E-16 | 1,21958E-13 | 2,565014004 |
| LPP      | 88,39052122      | 115,1370528      | 98,49773143      | 274,600255      | 302,5842776     | 259,2709199     | 290,0399471 | 1,46176849     | 0,177634178  | 8,229094803 | 1,88633E-16 | 1,59274E-13 | 2,520478047 |
| CALB2    | 324,0985778      | 301,6197153      | 350,7725334      | 796,0944612     | 826,9439753     | 747,4154795     | 514,0301461 | 1,282686298    | 0,156647241  | 8,188374672 | 2,64777E-16 | 2,00577E-13 | 2,432915643 |
| SETD7    | 415,9966594      | 470,388985       | 319,6150877      | 913,6923282     | 928,4039853     | 973,6070062     | 640,8412132 | 1,216864195    | 0,158843019  | 7,660797431 | 1,84782E-14 | 1,13315E-11 | 2,324409402 |
| ITGB8    | 394,2497851      | 389,6946403      | 302,5287465      | 1097,785324     | 1098,102586     | 1213,209098     | 435,496939  | 1,647312526    | 0,225788847  | 7,295809981 | 2,96868E-13 | 1,62932E-10 | 3,132495693 |
| OTUD4    | 280,6048293      | 257,3962334      | 278,4068531      | 626,7781605     | 740,7478606     | 604,3694547     | 542,5753524 | 1,273313501    | 0,174599438  | 7,29276975  | 3,03647E-13 | 1,62932E-10 | 2,417160885 |
| NTSR1    | 135,3918301      | 145,1514127      | 140,7110449      | 344,1738622     | 395,0655257     | 373,7077397     | 127,8501179 | 1,399755221    | 0,194192548  | 7,208078966 | 5,67467E-13 | 2,92314E-10 | 2,638568103 |
| MARCH4   | 258,1564429      | 327,205727       | 266,3459064      | 666,1826814     | 595,2919171     | 626,7203961     | 501,8227758 | 1,144695225    | 0,158955401  | 7,201361002 | 5,96145E-13 | 2,95275E-10 | 2,210994176 |
| ZBED2    | 54,71794171      | 27,55416649      | 36,18284012      | 222,8818213     | 162,5155912     | 199,370397      | 78,79548469 | 2,311659441    | 0,323925573  | 7,13639068  | 9,58134E-13 | 4,56995E-10 | 4,964537911 |
| MYC      | 204,8415254      | 247,9874984      | 204,0310151      | 522,7255975     | 606,9643076     | 531,058367      | 966,3998161 | 1,333637813    | 0,1486647554 | 7,032190941 | 2,03315E-12 | 9,20373967  |             |
| PTPRJ    | 560,5081465      | 590,9384634      | 591,9914675      | 1263,407451     | 1105,285596     | 1148,838387     | 1255,810119 | 1,013341804    | 0,144077822  | 7,03329485  | 2,01712E-12 | 9,0286E-10  | 2,018581455 |
| NGFR     | 96,10715402      | 62,48891328      | 98,49773143      | 382,9626874     | 263,077725      | 358,5090996     | 106,1805349 | 1,976671292    | 0,285454305  | 6,924650476 | 4,37053E-12 | 1,87612E-09 | 3,935839233 |
| TRNP1    | 49,10584512      | 60,02871984      | 54,27426018      | 137,9158231     | 146,3538197     | 130,5294976     | 538,3258305 | 1,336455823    | 0,193398121  | 6,910386793 | 4,83334E-12 | 2,00786E-09 | 2,525301813 |
| HECA     | 197,1248926      | 205,1801326      | 176,893885       | 366,9546008     | 423,7975639     | 381,7540786     | 291,1535873 | 1,010270504    | 0,146639112  | 6,88950233  | 5,59879E-12 | 2,25316E-09 | 2,014288742 |
| GALNT1   | 226,5883996      | 280,9540904      | 207,0462518      | 607,0759        | 589,0067837     | 528,376254      | 516,2749932 | 1,265435632    | 0,185333956  | 6,827867149 | 8,61863E-12 | 3,26443E-09 | 2,403997894 |
| NAPG     | 586,4640932      | 458,5800565      | 516,6105506      | 1137,189845     | 1189,685958     | 1046,024056     | 699,2217904 | 1,112064811    | 0,16475217   | 6,749925138 | 1,47921E-11 | 5,44266E-09 | 2,161547907 |
| C12orf73 | 88,39052122      | 79,21822864      | 81,41139027      | 224,1132126     | 292,7076395     | 194,9002088     | 112,7878032 | 1,514794207    | 0,224637606  | 6,743279691 | 1,54851E-11 | 5,53935E-09 | 2,857580632 |
| FGF2     | 656,6153005      | 309,984373       | 647,2708066      | 2082,282651     | 1796,650266     | 2181,451878     | 1068,024927 | 1,911088362    | 0,292749341  | 6,528070581 | 6,66223E-11 | 2,25779E-08 | 3,760927151 |
| SEMA7A   | 3360,944343      | 3338,974532      | 3680,598903      | 8338,981734     | 9024,553633     | 7016,407516     | 5900,882068 | 1,23197511     | 0,189166636  | 6,512644827 | 7,3839E-11  | 2,4382E-08  | 2,348883419 |
| INPP5A   | 129,0782215      | 83,15453814      | 131,6653349      | 301,0751675     | 307,0736586     | 299,5026144     | 233,2916555 | 1,412299499    | 0,217873321  | 6,482204844 | 9,03918E-11 | 2,83918E-08 | 2,661610566 |
| NAMPT    | 2866,378331      | 3836,425644      | 2680,545405      | 7542,271577     | 5977,161828     | 7050,380946     | 2960,156158 | 1,131812723    | 0,174992617  | 6,46777414  | 9,9457E-11  | 3,04954E-08 | 2,191339055 |
| CD40     | 1100,672443      | 1003,266883      | 1359,871741      | 2505,265555     | 2129,762334     | 2266,385455     | 1338,374151 | 0,99679448     | 0,154399471  | 6,455944922 | 1,07546E-10 | 3,22087E-08 | 1,995561139 |
| NABP1    | 288,3214621      | 186,4826625      | 244,2341708      | 636,0135951     | 633,0027173     | 532,8464423     | 367,023685  | 1,329196475    | 0,206854565  | 6,425753646 | 1,31218E-10 | 3,84051E-08 | 2,512626924 |
| ARMC10   | 140,3024146      | 158,4364573      | 155,7872283      | 432,2183386     | 321,4396777     | 435,3963379     | 205,9872543 | 1,388180235    | 0,217248987  | 6,389812242 | 1,6609E-10  | 4,64389E-08 | 2,617483123 |
| UAP1     | 1159,599457      | 960,9515562      | 1180,967698      | 2085,361129     | 2099,234543     | 2208,273008     | 2048,584767 | 0,954566087    | 0,149461157  | 6,386716846 | 1,69485E-10 | 4,64389E-08 | 1,937996663 |
| SLCO4A1  | 297,441119       | 401,0115301      | 367,8588745      | 831,1891126     | 674,3050222     | 896,7197678     | 531,045175  | 1,171077593    | 0,184127752  | 6,360136271 | 2,01575E-10 | 5,29772E-08 | 2,251798278 |
| EPHA2    | 3451,4394        | 2847,919922      | 3342,892395      | 7004,769285     | 5667,394541     | 6479,090885     | 3747,76597  | 0,990422244    | 0,156029117  | 6,34767575  | 2,18592E-10 | 5,63006E-08 | 1,986766387 |
| TSPAN4   | 403,3694421      | 370,0130928      | 472,3870793      | 788,7061135     | 771,2756512     | 759,9320067     | 740,5934129 | 0,902193579    | 0,143175057  | 6,301332079 | 2,95098E-10 | 7,45152E-08 | 1,868905445 |
| MMP1     | 10209,1052       | 17243,49579      | 11563,43265      | 37349,32885     | 39920,47349     | 33755,2857      | 13652,48851 | 1,508656795    | 0,241233399  | 6,253930018 | 4,0025E-10  | 9,72533E-08 | 2,845449933 |
| REL      | 77,16632805      | 61,99687459      | 62,31489132      | 191,4813437     | 153,5368293     | 166,2910038     | 150,4014686 | 1,346454037    | 0,215822792  | 6,238701786 | 4,41217E-10 | 1,05222E-07 | 2,542863528 |
| RP2      | 229,3944479      | 214,0368289      | 183,9294373      | 391,5824264     | 409,4315448     | 470,2638065     | 418,5405529 | 1,013014328    | 0,162611724  | 6,22965122  | 4,67475E-10 | 1,09457E-07 | 2,01812331  |
| ABCB10   | 82,07691256      | 108,2485112      | 75,38091691      | 207,4894303     | 193,9412581     | 182,3836816     | 254,8201477 | 1,118482263    | 0,180192722  | 6,20714451  | 5,3956E-10  | 1,21903E-07 | 2,171184404 |
| PODXL    | 1302,006408      | 820,2284916      | 1103,576624      | 2095,212259     | 3139,873053     | 2539,960978     | 1031,513989 | 1,269697942    | 0,206804157  | 6,139615178 | 8,27216E-10 | 1,77548E-07 | 2,411110788 |
| C9orf41  | 23,85141049      | 27,55416649      | 18,09142006      | 153,9239097     | 80,80885752     | 113,5427822     | 77,72284352 | 2,311438841    | 0,386265851  | 5,984062102 | 2,1764E-09  | 4,59471E-07 | 4,963778851 |
| GGCT     | 675,5561265      | 608,6518561      | 716,6212501      | 1193,833844     | 1266,903311     | 1129,169558     | 838,0244294 | 0,845328035    | 0,141931216  | 5,955899332 | 2,58646E-09 | 5,2025E-07  | 1,796673221 |
| MSANTD3  | 306,560776       | 226,8298348      | 307,554141       | 569,5184661     | 606,9643076     | 484,5684089     | 958,9325728 | 0,988283164    | 0,165938661  | 5,955713741 | 2,58939E-09 | 5,2025E-07  | 1,983822796 |

|          |             |             |             |             |              |             |             |             |             |             |             |             |             |
|----------|-------------|-------------|-------------|-------------|--------------|-------------|-------------|-------------|-------------|-------------|-------------|-------------|-------------|
| UHMK1    | 249,738298  | 373,4573636 | 217,0970407 | 649,5588991 | 691,3646699  | 739,3691406 | 541,1150542 | 1,300742895 | 0,218486513 | 5,953424205 | 2,62589E-09 | 5,2025E-07  | 2,463557073 |
| LRRC57   | 273,5897085 | 262,748659  | 264,3357486 | 585,5265527 | 483,0573927  | 633,8726973 | 415,9301431 | 1,088710167 | 0,184093194 | 5,913907738 | 3,34085E-09 | 6,51871E-07 | 2,126838028 |
| ZNF652   | 179,5870907 | 142,6912193 | 143,7262816 | 341,7110796 | 355,5589731  | 285,1980119 | 262,1077073 | 1,076456197 | 0,208226455 | 5,907244434 | 3,47878E-09 | 6,68652E-07 | 2,108849584 |
| ROR1     | 182,393139  | 288,3346707 | 221,1173563 | 570,1341617 | 491,1382785  | 535,5285553 | 419,4884983 | 1,202835804 | 0,046909961 | 5,876350354 | 4,1941E-09  | 7,94289E-07 | 2,301916982 |
| CEP97    | 119,9585645 | 90,04307976 | 107,5434415 | 242,5840818 | 241,5286964  | 219,9332631 | 169,4705713 | 1,155361729 | 0,196908972 | 5,867491551 | 4,42438E-09 | 8,25755E-07 | 2,227401646 |
| ITPR3    | 1250,796026 | 1104,134814 | 1229,211485 | 1886,491438 | 1981,612762  | 1969,564954 | 1185,46956  | 0,704504983 | 0,120566372 | 5,843295861 | 5,1178E-09  | 9,41529E-07 | 1,629585426 |
| CORO2B   | 14,03024146 | 18,20543143 | 20,10157784 | 48,02425984 | 73,62584796  | 47,38399571 | 419,374627  | 1,693492294 | 0,290610089 | 5,82736924  | 5,63079E-09 | 1,02131E-06 | 3,234386965 |
| KIAA0317 | 697,3030007 | 431,5179287 | 678,4282522 | 1358,22458  | 1493,168112  | 1330,32803  | 1081,650897 | 1,212594461 | 0,213216808 | 5,687142913 | 1,29182E-08 | 2,25462E-06 | 2,317540356 |
| LRRC15   | 101,0177385 | 103,3281243 | 99,50281033 | 246,8939512 | 252,3032107  | 210,9928866 | 85,25164572 | 1,224335779 | 0,215300024 | 5,686649515 | 1,29556E-08 | 2,25462E-06 | 2,336478528 |
| CCNJ     | 50,50886927 | 69,86949359 | 56,28441796 | 124,3705191 | 163,4134674  | 156,4565896 | 95,99247248 | 1,31557796  | 0,232283338 | 5,663677702 | 1,48163E-08 | 2,50216E-06 | 2,489020236 |
| ITGA6    | 1163,808529 | 866,9721669 | 1293,536534 | 2924,554285 | 2380,269792  | 2729,49696  | 2268,901301 | 1,274382883 | 0,225527854 | 5,650667362 | 1,59826E-08 | 2,63877E-06 | 2,418953243 |
| MAPKAPK2 | 770,2602563 | 739,0421082 | 726,6720391 | 1456,120186 | 1164,545425  | 1332,116106 | 1133,145396 | 0,822448495 | 0,174592846 | 5,635970473 | 1,74075E-08 | 2,83765E-06 | 1,768404725 |
| PMAIP1   | 378,8165195 | 231,7502217 | 400,0213991 | 709,8970717 | 806,2928228  | 785,8590986 | 523,6752067 | 1,192639293 | 0,212211817 | 5,620041841 | 1,90911E-08 | 3,07319E-06 | 2,285705121 |
| ZFP36L1  | 1444,413359 | 780,8653966 | 1450,328841 | 3199,770236 | 3331,120682  | 2893,999889 | 2836,51501  | 1,359720701 | 0,243286832 | 5,588961352 | 2,28432E-08 | 3,63178E-06 | 2,566354913 |
| CNOT6    | 408,9815387 | 536,3221691 | 384,9452157 | 1183,367018 | 1043,332138  | 1038,871755 | 717,3400405 | 1,293597955 | 0,231684418 | 5,58344823  | 2,35796E-08 | 3,66619E-06 | 2,451386481 |
| STK35    | 202,0354771 | 201,2438231 | 210,0614885 | 373,1115572 | 353,7632207  | 354,932949  | 215,2284476 | 0,821198955 | 0,147086963 | 5,583084579 | 2,3629E-08  | 3,66619E-06 | 1,766873747 |
| NIPA1    | 127,6751973 | 147,1195675 | 123,6247037 | 304,7693413 | 283,7288775  | 235,1319032 | 217,320145  | 1,044035863 | 0,187807932 | 5,559061614 | 2,71229E-08 | 4,10928E-06 | 2,061987895 |
| PTPRF    | 675,5561265 | 742,486379  | 717,626329  | 1392,703535 | 1210,33711   | 1295,460562 | 1127,119943 | 0,868405252 | 0,156395075 | 5,552638106 | 2,8139E-08  | 4,21366E-06 | 1,825643727 |
| XPOT     | 2524,741951 | 2964,533091 | 2634,311776 | 4442,859731 | 4210,141477  | 4069,659405 | 2827,663743 | 0,646859401 | 0,117004471 | 5,528501537 | 3,22978E-08 | 4,78081E-06 | 1,565755993 |
| PDPN     | 2115,760413 | 1390,717996 | 2507,671836 | 3982,935089 | 4062,5071104 | 3982,935089 | 2137,106608 | 0,982214843 | 0,178343085 | 5,507466026 | 3,64036E-08 | 5,26747E-06 | 1,975500872 |
| LAMB3    | 1153,285848 | 1555,33429  | 1294,541613 | 3194,228975 | 2831,901518  | 3187,24424  | 4468,102422 | 1,202183921 | 0,218441239 | 5,503465944 | 3,72396E-08 | 5,32858E-06 | 2,300877094 |
| CARD10   | 37,88165195 | 34,93474679 | 50,25394461 | 103,4368673 | 79,91098133  | 118,0129704 | 146,841399  | 1,317425233 | 0,241769956 | 5,449085798 | 5,06294E-08 | 7,16489E-06 | 2,4922093   |
| SKP2     | 1393,904489 | 1429,864425 | 1608,126228 | 2394,44034  | 2397,32944   | 2142,114221 | 1584,404624 | 0,646999234 | 0,118991989 | 5,437334396 | 5,40836E-08 | 7,57053E-06 | 1,565907761 |
| DHCR24   | 1945,994491 | 1658,170376 | 2001,112074 | 3297,050147 | 3683,986027  | 3130,02583  | 3107,141566 | 0,851678913 | 0,156756209 | 5,433143087 | 5,537E-08   | 7,66725E-06 | 1,804599777 |
| EPHB2    | 1258,512659 | 1170,560037 | 1436,257737 | 2213,425822 | 2124,375077  | 2084,001774 | 1004,20505  | 0,734040132 | 0,136252583 | 5,387348382 | 7,15048E-08 | 9,55424E-06 | 1,663290464 |
| GNB4     | 127,6751973 | 119,0733623 | 116,5891515 | 282,6042983 | 211,8987819  | 223,5094137 | 221,6597377 | 0,986182719 | 0,183094492 | 5,386195432 | 7,19647E-08 | 9,55424E-06 | 1,980936615 |
| TAF9B    | 336,024283  | 231,7502217 | 359,8182434 | 785,6276353 | 757,8075083  | 637,4488479 | 375,8365842 | 1,237861491 | 0,230188099 | 5,377608551 | 7,54817E-08 | 9,86661E-06 | 2,358486742 |
| NUFIP2   | 330,4121865 | 393,1389111 | 329,6658766 | 690,8105069 | 742,543613   | 690,1970696 | 714,4501338 | 1,009183585 | 0,188231771 | 5,361388135 | 8,25849E-08 | 1,053E-05   | 2,012771759 |
| FST      | 415,9966594 | 520,0848924 | 445,2499492 | 946,9398927 | 852,982385   | 889,5674666 | 339,4508361 | 0,95997668  | 0,179139719 | 5,358815366 | 8,37694E-08 | 1,05763E-05 | 1,945278451 |
| ARL5B    | 272,1866844 | 218,9572158 | 229,1579874 | 475,9327289 | 472,2828784  | 447,9128651 | 434,1035868 | 0,955566695 | 0,17845818  | 5,354569311 | 8,57604E-08 | 1,07226E-05 | 1,939341263 |
| IRAK2    | 198,5279167 | 140,2310259 | 206,0411729 | 413,1317738 | 365,4356112  | 400,5288694 | 192,0950177 | 1,121744217 | 0,209575351 | 5,352462555 | 8,67653E-08 | 1,07439E-05 | 2,176099037 |
| EIF4EBP2 | 611,7185278 | 926,5088481 | 558,8238641 | 1547,243141 | 1538,959798  | 1611,949892 | 1541,989431 | 1,16111305  | 0,217160417 | 5,346798779 | 8,95234E-08 | 1,09798E-05 | 2,236298932 |
| PLCB4    | 527,537079  | 601,2712758 | 518,6207084 | 1417,331361 | 1443,784921  | 1444,76485  | 682,8397405 | 1,385410992 | 0,259947589 | 5,329578148 | 9,84412E-08 | 1,18479E-05 | 2,612463702 |
| IL15RA   | 22,44838634 | 23,1258183  | 41,20823458 | 84,35030254 | 87,99186708  | 96,55606673 | 61,13751449 | 1,665527101 | 0,312858907 | 5,323572582 | 1,01749E-07 | 1,21326E-05 | 3,17229536  |
| ROBO4    | 161,3477768 | 112,1848207 | 156,7923072 | 296,765298  | 338,4993254  | 245,8603551 | 383,0304852 | 1,042769584 | 0,197229138 | 5,287097    | 1,24273E-07 | 1,45489E-05 | 2,060178845 |
| CDK6     | 470,013089  | 497,4511128 | 429,168687  | 1096,553933 | 1042,434262  | 1088,043826 | 655,3511723 | 1,20731823  | 0,231843721 | 5,207465734 | 1,91437E-07 | 2,22102E-05 | 2,309080117 |
| ANXA2    | 8072,299426 | 6906,255014 | 6073,691745 | 11717,9194  | 12170,71182  | 12209,87225 | 14085,86744 | 0,777788785 | 0,150034899 | 5,184052448 | 2,17116E-07 | 2,47435E-05 | 1,714501047 |
| PSMD4    | 87,68900915 | 103,820163  | 95,48249476 | 249,3567338 | 168,8007246  | 221,7213384 | 148,7846889 | 1,157375344 | 0,223422094 | 5,180218859 | 2,21626E-07 | 2,50359E-05 | 2,230512671 |
| TDG      | 401,9664179 | 276,0337035 | 353,7877701 | 589,8364221 | 635,6963458  | 670,5282412 | 477,4781151 | 0,880544108 | 0,17005007  | 5,178146095 | 2,24102E-07 | 2,50955E-05 | 1,841069525 |
| ABHD2    | 1814,811733 | 829,085188  | 1676,471592 | 3875,188352 | 3456,82335   | 3545,753339 | 305658      | 1,33315084  | 0,260952253 | 5,108792215 | 3,24225E-07 | 3,56869E-05 | 2,10523374  |
| LCLAT1   | 264,4700516 | 234,2104151 | 180,9142006 | 450,6892077 | 610,5558124  | 473,8399571 | 356,9871129 | 1,171059995 | 0,229304522 | 5,107007854 | 3,273E-07   | 3,57201E-05 | 2,251770811 |
| PCGF5    | 136,0933422 | 154,9921865 | 131,6653349 | 266,5962117 | 287,3203823  | 244,9663174 | 190,5002472 | 0,91240903  | 0,178977853 | 5,097887886 | 3,43464E-07 | 3,71692E-05 | 1,882185773 |
| ELMOD2   | 125,5706611 | 86,10677027 | 135,6856504 | 277,0630375 | 253,2010869  | 271,7874471 | 185,3663138 | 1,218121675 | 0,239154925 | 5,093441727 | 3,51621E-07 | 3,77348E-05 | 2,326436283 |
| CDH5     | 17,53780183 | 15,74523799 | 17,08634117 | 67,72652029 | 63,74920982  | 54,53629695 | 19,69845067 | 1,892042599 | 0,371814559 | 5,088672713 | 3,60578E-07 | 3,83763E-05 | 3,711603498 |
| RC3H2    | 357,7711573 | 366,0767833 | 304,5389043 | 819,4908955 | 622,2282029  | 784,965061  | 574,9157954 | 1,113176321 | 0,219248786 | 5,077229121 | 3,82979E-07 | 4,04263E-05 | 2,163213891 |
| INPP4B   | 75,06179183 | 53,63221691 | 93,47233697 | 229,0387777 | 149,9453245  | 186,8538699 | 157,1825897 | 1,368194883 | 0,269574765 | 5,075381894 | 3,86719E-07 | 4,04891E-05 | 2,58147367  |
| RAB3B    | 312,1728726 | 253,3999239 | 332,6811133 | 570,1341617 | 649,1644888  | 492,6147478 | 457,4020341 | 0,934637038 | 0,184494084 | 5,065945844 | 4,06377E-07 | 4,18666E-05 | 1,91140969  |
| UBE2V2   | 1256,408123 | 1151,370528 | 1172,927067 | 1900,652438 | 2403,614573  | 2162,677087 | 1853,02205  | 0,852516972 | 0,168238405 | 5,06731488  | 4,03467E-07 | 4,18666E-05 | 1,805648371 |
| PARP2    | 182,393139  | 174,673734  | 177,8989639 | 399,5864697 | 359,1504779  | 382,6481163 | 243,801534  | 1,09409209  | 0,218895711 | 4,998234484 | 5,78576E-07 | 5,77589E-05 | 2,134786939 |
| TTL      | 357,7711573 | 352,7917387 | 404,0417147 | 666,798377  | 639,2878506  | 573,0781368 | 779,2758363 | 0,757221363 | 0,151552058 | 4,996443959 | 5,83971E-07 | 5,78491E-05 | 1,690232093 |

|          |             |             |             |             |             |             |             |             |             |             |             |             |             |
|----------|-------------|-------------|-------------|-------------|-------------|-------------|-------------|-------------|-------------|-------------|-------------|-------------|-------------|
| ATF4     | 1447,920919 | 1245,349917 | 1515,658969 | 2124,149954 | 2405,410326 | 2085,789849 | 2385,591142 | 0,653500155 | 0,130872291 | 4,993418761 | 5,93197E-07 | 5,78727E-05 | 1,572979812 |
| GNPNAT1  | 1014,386458 | 626,3652488 | 952,8147898 | 1578,027923 | 1941,208333 | 1998,174159 | 1579,318414 | 1,090179408 | 0,218703835 | 4,984729264 | 6,20486E-07 | 5,96315E-05 | 2,129005103 |
| YAP1     | 1578,402165 | 978,6649489 | 1272,429878 | 2340,259124 | 2879,488956 | 2563,205957 | 3257,776176 | 1,023588048 | 0,205542431 | 4,979935481 | 6,36055E-07 | 6,06749E-05 | 2,032968762 |
| LAMA5    | 298,1426311 | 230,2741056 | 282,4271687 | 475,9327289 | 474,976507  | 477,4161077 | 415,7754234 | 0,820841893 | 0,165551792 | 4,958218118 | 7,11427E-07 | 6,68741E-05 | 1,766436506 |
| OSTM1    | 166,9598734 | 110,7087046 | 138,7008871 | 333,7070363 | 417,5124305 | 300,396652  | 306,0912466 | 1,339091104 | 0,270678569 | 4,947163376 | 7,53028E-07 | 7,02717E-05 | 2,529918841 |
| MMP3     | 162,750801  | 130,3902521 | 186,9446739 | 329,3971669 | 318,7460491 | 364,7673632 | 127,8206156 | 1,084384114 | 0,220206803 | 4,924389697 | 8,4624E-07  | 7,8402E-05  | 2,120470062 |
| ARNTL2   | 253,9473705 | 224,3696414 | 297,5033521 | 530,1139452 | 490,2404023 | 482,7803336 | 865,7601154 | 0,959589946 | 0,19568172  | 4,903830299 | 9,39857E-07 | 8,58403E-05 | 1,944757063 |
| CLDN11   | 239,917129  | 174,673734  | 287,4525632 | 511,643076  | 553,0917359 | 495,2968608 | 188,6200588 | 1,157963852 | 0,236795937 | 4,890133947 | 1,00767E-06 | 9,0747E-05  | 2,231422734 |
| SHANK1   | 28,06048293 | 24,60193436 | 20,10157784 | 66,49512901 | 75,42160035 | 57,21840991 | 639,2781341 | 1,439210097 | 0,294298572 | 4,890306082 | 1,00679E-06 | 9,0747E-05  | 2,711723527 |
| HHEX     | 192,214308  | 208,1323647 | 174,8837272 | 431,6026429 | 318,7460491 | 472,0518818 | 171,6555146 | 1,085079859 | 0,223226151 | 4,860899381 | 1,16854E-06 | 0,000103071 | 2,121492913 |
| CD274    | 378,1150074 | 410,8523038 | 468,3667638 | 670,4925508 | 701,241308  | 698,2434085 | 357,4965766 | 0,721631224 | 0,148805733 | 4,849485365 | 1,23782E-06 | 0,000107707 | 1,64904552  |
| DENND1B  | 37,18013988 | 44,28348185 | 35,17776123 | 78,80904179 | 85,2982385  | 80,46338894 | 124,5372784 | 1,047556365 | 0,216265064 | 4,843853867 | 1,27345E-06 | 0,00011001  | 2,067025755 |
| MMP9     | 16,13477768 | 9,348735057 | 18,09142006 | 48,02425984 | 41,30230496 | 45,5959204  | 50,06276006 | 1,683319926 | 0,349885865 | 4,811054394 | 1,50136E-06 | 0,000125466 | 3,211661681 |
| DOCK9    | 587,1656052 | 613,572243  | 573,9000474 | 944,4771102 | 953,5445188 | 858,2761487 | 620,2851985 | 0,634459689 | 0,132056518 | 4,804455694 | 1,55173E-06 | 0,000127281 | 1,55235626  |
| PDLM2    | 4,209072439 | 10,33281243 | 7,035552245 | 28,93769503 | 22,44690487 | 30,39728027 | 88,89578814 | 1,874288049 | 0,391373745 | 4,788997915 | 1,67616E-06 | 0,000136618 | 3,666206502 |
| ANXA3    | 420,2057318 | 384,2822147 | 462,3362904 | 685,8849418 | 829,6376039 | 651,7534504 | 897,5267277 | 0,776946322 | 0,16234334  | 4,78582197  | 1,70289E-06 | 0,000137923 | 1,713500155 |
| NAV2     | 136,7948543 | 136,2947164 | 129,6551771 | 326,3186887 | 247,8138297 | 261,9530329 | 103,2358582 | 1,054946573 | 0,220673561 | 4,780575299 | 1,74794E-06 | 0,000139953 | 2,077641264 |
| PIIP5K2  | 92,59959366 | 61,5048359  | 91,46217919 | 275,2159506 | 203,8178962 | 261,9530329 | 173,9653909 | 1,600405232 | 0,334786509 | 4,780375523 | 1,74968E-06 | 0,000139953 | 3,032284738 |
| GHITM    | 1398,113562 | 1272,412045 | 1420,176475 | 2084,129738 | 2111,80481  | 1969,564954 | 1633,30233  | 0,592793259 | 0,124065617 | 4,778062406 | 1,76992E-06 | 0,000140698 | 1,508163939 |
| KRT18    | 3882,167813 | 3320,277061 | 4162,031693 | 7143,916499 | 7642,722169 | 6659,686491 | 4602,870874 | 0,916459743 | 0,216340359 | 4,732793036 | 2,21451E-06 | 0,000171798 | 1,867477888 |
| CORO1A   | 37,88165195 | 30,01435992 | 39,1980768  | 77,57765051 | 77,21735274 | 92,08587845 | 55,07028142 | 1,21908753  | 0,258634362 | 4,713555934 | 2,43431E-06 | 0,000187719 | 2,327994307 |
| C10orf12 | 261,6640033 | 246,5113823 | 250,2646442 | 400,2021653 | 511,789431  | 449,7009404 | 381,2038481 | 0,842911385 | 0,179130661 | 4,705567314 | 2,53161E-06 | 0,000192165 | 1,793666143 |
| ETHE1    | 96,8086661  | 55,60037166 | 94,47741587 | 203,1795609 | 242,4265726 | 175,2313804 | 270,2320778 | 1,341197487 | 0,285048539 | 4,705154747 | 2,53673E-06 | 0,000192165 | 2,533615304 |
| DGKH     | 166,2583613 | 116,6131689 | 180,9142006 | 278,2944288 | 360,0483541 | 362,0852502 | 229,6618496 | 1,115082925 | 0,238447765 | 4,676424315 | 2,9192E-06  | 0,000216055 | 2,166074592 |
| PTAR1    | 148,0190474 | 145,6434514 | 124,6297826 | 269,6746899 | 246,9159535 | 262,8470705 | 213,492377  | 0,893695581 | 0,19134028  | 4,670713251 | 3,00156E-06 | 0,00022088  | 1,857929271 |
| DDX52    | 1346,90318  | 812,8479113 | 1148,805174 | 1953,602262 | 2839,084528 | 1890,88964  | 1213,05668  | 1,01506078  | 0,21744167  | 4,668198045 | 3,03853E-06 | 0,000222331 | 2,020988035 |
| AMPD3    | 451,7737751 | 330,6499978 | 474,3972371 | 724,6737671 | 813,4758324 | 761,720082  | 430,5807865 | 0,875160129 | 0,18791605  | 4,657186698 | 3,2056E-06  | 0,00023192  | 1,83421166  |
| ZCHC24   | 213,9611823 | 259,7964269 | 155,7872283 | 419,2887301 | 848,9380973 | 451,4890157 | 309,189786  | 1,059911196 | 0,237817134 | 4,64119394  | 3,46402E-06 | 0,000245108 | 2,084803189 |
| PIK3CD   | 737,990701  | 449,7233601 | 761,8498003 | 1324,977015 | 1102,591967 | 1438,506587 | 835,4660406 | 0,990427211 | 0,213933501 | 4,629603162 | 3,66367E-06 | 0,000253932 | 1,986773227 |
| HMGA2    | 3365,854927 | 4079,492756 | 3704,720797 | 6387,226559 | 9178,090462 | 7743,260129 | 4877,473187 | 1,063653558 | 0,230043518 | 4,623705851 | 3,76944E-06 | 0,000254151 | 2,090218206 |
| SOX7     | 105,928323  | 138,2628711 | 81,41139027 | 264,1334291 | 197,5327628 | 266,4232212 | 157,1039209 | 1,149628165 | 0,248607172 | 4,624275936 | 3,75909E-06 | 0,000254151 | 2,218567065 |
| PER2     | 26,65745878 | 34,44270811 | 27,13713009 | 80,04043307 | 70,03434319 | 58,11244757 | 49,27961499 | 1,228044222 | 0,267439053 | 4,591865727 | 4,39301E-06 | 0,000294652 | 2,342492165 |
| HS2ST1   | 540,1642963 | 669,1726146 | 559,8289429 | 1171,668801 | 1192,379587 | 945,8918389 | 726,9577375 | 0,902736436 | 0,196881503 | 4,585176484 | 4,53603E-06 | 0,000302654 | 1,869608808 |
| TGFBR1   | 269,3806361 | 355,2519322 | 228,1529085 | 609,5386826 | 477,6701356 | 598,1111911 | 386,8657567 | 0,977763523 | 0,213444106 | 4,580887903 | 4,63006E-06 | 0,000304214 | 1,969410046 |
| PLAGL1   | 14,73175354 | 14,26912193 | 6,030473353 | 30,78478195 | 40,40442876 | 30,39728027 | 285,1056414 | 1,456917564 | 0,3196576   | 4,557744175 | 5,1706E-06  | 0,000336298 | 2,745211995 |
| PLAU     | 1977,562534 | 1681,788233 | 1658,380172 | 2540,360206 | 2873,203823 | 2789,397483 | 4044,41712  | 0,624904727 | 0,137290684 | 4,551690691 | 5,32165E-06 | 0,000344383 | 1,542108984 |
| LAMB1    | 749,2148941 | 272,5894327 | 587,9711519 | 1516,458359 | 1336,937654 | 1422,413909 | 948,5286577 | 1,411132201 | 0,310345944 | 4,546965181 | 5,4425E-06  | 0,000350443 | 2,659457904 |
| EMP1     | 3997,215793 | 2407,545297 | 4314,803684 | 7007,232067 | 7488,287464 | 6961,871219 | 5475,485053 | 1,001719869 | 0,220731005 | 4,538192846 | 5,67384E-06 | 0,000359939 | 2,002385667 |
| ADAMTS6  | 1302,006408 | 1394,929678 | 1400,074897 | 2099,522129 | 1898,110276 | 2086,683886 | 980,6423389 | 0,570822659 | 0,126328555 | 4,518556085 | 6,22628E-06 | 0,000388429 | 1,485370323 |
| NXPE3    | 178,8855787 | 101,8520083 | 149,7567549 | 328,7814712 | 288,2182585 | 285,1980119 | 380,9151235 | 1,074636978 | 0,237817134 | 4,518753384 | 6,22048E-06 | 0,000388429 | 2,106192028 |
| THY1     | 2670,656463 | 2688,991426 | 2714,718088 | 4175,647824 | 4321,478125 | 4021,381372 | 1716,259801 | 0,632677035 | 0,139975506 | 4,51991246  | 6,18652E-06 | 0,000388429 | 1,550439289 |
| HLA-C    | 1088,045225 | 461,5322886 | 1156,845805 | 2866,678895 | 2035,485333 | 2560,523844 | 873,2822089 | 1,464736907 | 0,324365301 | 4,515701591 | 6,31075E-06 | 0,00039072  | 2,760131318 |
| LAMC2    | 929,503497  | 1536,144782 | 930,7030542 | 2563,140945 | 2265,341639 | 2290,524472 | 2296,186238 | 1,066458389 | 0,237117374 | 4,497596986 | 6,87258E-06 | 0,000423469 | 2,094285878 |
| NLRP3    | 47,0013089  | 36,90290154 | 61,30981242 | 97,27991096 | 111,3366481 | 103,708368  | 147,2352672 | 1,129172177 | 0,251945855 | 4,481804938 | 7,40144E-06 | 0,000447492 | 2,187331945 |
| FBXL17   | 68,74818317 | 57,56852641 | 55,27933907 | 114,5193888 | 115,8260291 | 125,1652717 | 85,3043646  | 0,96529723  | 0,21560488  | 4,477158551 | 7,56431E-06 | 0,000453382 | 1,952465735 |
| SDF2L1   | 89,09203329 | 61,5048359  | 79,40123248 | 155,7709967 | 171,4943532 | 162,7148532 | 173,8752846 | 1,097726454 | 0,245191409 | 4,477018428 | 7,56927E-06 | 0,000453382 | 2,140171566 |
| DCP2     | 310,7698484 | 124,9778266 | 259,3103542 | 488,2466417 | 736,2584796 | 578,4423627 | 485,860211  | 1,378536249 | 0,308362953 | 4,470498924 | 7,80373E-06 | 0,000465261 | 2,600044381 |
| SERTAD4  | 16,83628976 | 23,1258183  | 13,0660256  | 54,79691187 | 54,77044788 | 35,7615062  | 90,06838424 | 1,416687266 | 0,318215413 | 4,451975632 | 8,50838E-06 | 0,00049805  | 2,669717826 |
| SLC9A6   | 183,7961632 | 310,9684503 | 189,9599106 | 522,1099019 | 511,789431  | 475,6280324 | 358,4781059 | 1,13512995  | 0,255490147 | 4,442950008 | 8,87338E-06 | 0,000517065 | 2,196383456 |
| CAB39    | 371,8013988 | 396,0911432 | 399,0163202 | 623,0839866 | 633,0027173 | 614,2038689 | 612,4225173 | 0,680815364 | 0,153726827 | 4,428734911 | 9,47874E-06 | 0,000544943 | 1,603045488 |

|           |             |              |             |             |              |             |              |             |             |             |             |             |             |
|-----------|-------------|--------------|-------------|-------------|--------------|-------------|--------------|-------------|-------------|-------------|-------------|-------------|-------------|
| SCO1      | 252,5443463 | 202,2279005  | 251,269723  | 444,5322513 | 379,8016304  | 474,7339947 | 284,67842    | 0,883479378 | 0,199881919 | 4,420006492 | 9,86979E-06 | 0,000564903 | 1,844819129 |
| LFNG      | 63,83759866 | 25,09397305  | 51,2590235  | 127,4489973 | 115,8260291  | 108,1785562 | 435,6591728  | 1,34695544  | 0,305100415 | 4,41479386  | 1,01106E-05 | 0,000573589 | 2,543747444 |
| CENPQ     | 312,1728726 | 364,1086286  | 292,4779576 | 586,7579439 | 485,7510213  | 691,0911072 | 379,9529488  | 0,861385289 | 0,195683803 | 4,401924311 | 1,07295E-05 | 0,000603382 | 1,816781964 |
| VPS36     | 98,91320232 | 64,94910671  | 108,5485204 | 172,3947789 | 184,0646199  | 204,734623  | 235,4119934  | 1,056081882 | 0,239902283 | 4,402133526 | 1,07192E-05 | 0,000603382 | 2,079276879 |
| TJP2      | 220,976303  | 215,0209063  | 285,4424054 | 377,4214267 | 372,6186208  | 461,3234299 | 714,2624996  | 0,753800993 | 0,171757611 | 4,388748697 | 1,14005E-05 | 0,000637745 | 1,686229604 |
| TMPPE     | 27,35897085 | 13,77708324  | 14,07110449 | 54,18121623 | 56,56620027  | 50,06610867 | 39,74134987  | 1,54227254  | 0,351474763 | 4,388003642 | 1,14396E-05 | 0,000637745 | 2,912529253 |
| PHF20L1   | 304,4562398 | 261,7645816  | 225,1376719 | 403,8963392 | 457,0189831  | 405,8930953 | 557,5858583  | 0,673718662 | 0,153581963 | 4,386704334 | 1,15081E-05 | 0,000638799 | 1,595179375 |
| SERINC2   | 787,0965461 | 678,5213497  | 923,6675019 | 1244,936582 | 1322,571635  | 1291,884411 | 1994,464184  | 0,694238644 | 0,158356283 | 4,384029686 | 1,16504E-05 | 0,00064117  | 1,618030321 |
| ATP13A3   | 1779,73613  | 1823,987414  | 1558,877362 | 2329,176602 | 2524,827859  | 2444,298948 | 1968,085943  | 0,49798923  | 0,113799072 | 4,376039453 | 1,20855E-05 | 0,00065948  | 1,412243861 |
| UBXN2A    | 129,7797335 | 129,4061747  | 133,6754927 | 310,310602  | 231,6520582  | 278,9397483 | 231,4580827  | 1,065527135 | 0,243559125 | 4,374819203 | 1,21533E-05 | 0,000660381 | 2,092934461 |
| TMBIM6    | 12026,72298 | 11275,06652  | 13481,12318 | 22350,98309 | 20548,79459  | 20432,33656 | 15189,60168  | 0,783996671 | 0,179644602 | 4,36415378  | 1,27616E-05 | 0,000690519 | 1,721894403 |
| ATP6AP2   | 898,6369657 | 915,6839969  | 778,9361414 | 1588,494749 | 1412,359254  | 1320,493616 | 1019,468787  | 0,736053236 | 0,168951507 | 4,356594676 | 1,32102E-05 | 0,000706294 | 1,665613002 |
| IGFBP7    | 423,7132922 | 228,7979896  | 383,9401368 | 757,3056359 | 763,1947655  | 718,8062745 | 387,7708307  | 1,114516506 | 0,256576218 | 4,343802854 | 1,40037E-05 | 0,000745206 | 2,165224333 |
| FMNL1     | 117,1525162 | 71,34560965  | 137,6958082 | 248,7410381 | 235,243563   | 213,6749995 | 256,7525589  | 1,111636553 | 0,256618563 | 4,331863363 | 1,47853E-05 | 0,000780347 | 2,160906355 |
| CDK17     | 828,4857584 | 690,3302782  | 816,1240605 | 1344,06358  | 1134,017634  | 1278,473846 | 829,3364395  | 0,687759297 | 0,159436402 | 4,313690524 | 1,60552E-05 | 0,000843912 | 1,610779813 |
| TMPRSS2   | 51,91189341 | 49,20386872  | 60,30473353 | 121,2920409 | 120,3154101  | 109,9666316 | 44,56267993  | 1,13288336  | 0,262861772 | 4,309806448 | 1,63397E-05 | 0,000855379 | 2,192965871 |
| IL32      | 86,285985   | 74,29784177  | 57,28949685 | 124,3705191 | 149,0474483  | 127,8473846 | 233,7412802  | 0,865173318 | 0,200875393 | 4,307014933 | 1,65472E-05 | 0,000862734 | 1,821558487 |
| NRIP3     | 206,9460616 | 175,1657727  | 235,1884608 | 403,2806435 | 344,7844588  | 330,7939323 | 727,4460832  | 0,813815086 | 0,189913502 | 4,285188127 | 1,82585E-05 | 0,000936783 | 1,757853799 |
| PRSS23    | 297,441119  | 511,228196   | 372,884269  | 744,3760275 | 172,5092698  | 873,4747888 | 900,6738552  | 0,952095763 | 0,222750363 | 4,274272559 | 1,91762E-05 | 0,000976093 | 1,934681075 |
| EPHX4     | 77,86784012 | 70,85357096  | 96,48757365 | 147,1512577 | 156,43504579 | 156,4565896 | 103,8886302  | 0,919600046 | 0,215454663 | 4,268183529 | 1,97071E-05 | 0,000993379 | 1,891590821 |
| STAT3     | 730,2740682 | 705,0914388  | 642,2454121 | 1305,274755 | 1382,72934   | 1270,427508 | 1186,189885  | 0,929451301 | 0,217785894 | 4,26772957  | 1,97473E-05 | 0,000993379 | 1,904551502 |
| PPL       | 54,01642963 | 51,66406216  | 37,18791901 | 113,9036932 | 96,97062903  | 137,6817989 | 41,84381353  | 1,274603931 | 0,299002189 | 4,262858197 | 2,01829E-05 | 0,001011342 | 2,4193239   |
| REXO2     | 584,359557  | 429,0577353  | 605,0574931 | 1002,3525   | 805,3949466  | 972,7129685 | 850,4274352  | 0,784085422 | 0,184118534 | 4,258590398 | 2,0572E-05  | 0,001022881 | 1,722000334 |
| NGF       | 16,13477768 | 14,76116062  | 15,07618338 | 43,71439037 | 55,66832407  | 50,96014633 | 16,64012112  | 1,706974874 | 0,401460438 | 4,25191305  | 2,11952E-05 | 0,001045793 | 3,264755324 |
| ADAMTS12  | 972,2957334 | 1063,295603  | 964,8757365 | 1588,494749 | 1379,137835  | 1729,068825 | 840,4301033  | 0,645857129 | 0,151993717 | 4,249235701 | 2,14501E-05 | 0,001054021 | 1,564668605 |
| PIK3R1    | 274,2912206 | 234,2104151  | 242,224013  | 536,2709015 | 480,3637642  | 536,4225929 | 334,3870225  | 1,049156356 | 0,246950508 | 4,248447849 | 2,15257E-05 | 0,001054021 | 2,069319419 |
| SDC4      | 5696,979546 | 6404,375553  | 5748,046184 | 9663,958749 | 8809,961222  | 9336,43523  | 4749,50107   | 0,639654618 | 0,150698409 | 4,244600996 | 2,18983E-05 | 0,001065911 | 1,557956139 |
| FAM46A    | 202,0354771 | 185,9906238  | 158,802465  | 277,6787332 | 327,7248111  | 342,4164218 | 237,5979604  | 0,787077172 | 0,18552323  | 4,242472353 | 2,21071E-05 | 0,001070282 | 1,72574991  |
| KLF2      | 81,37540049 | 86,10677027  | 86,43678473 | 153,3082141 | 173,2901056  | 183,2777193 | 114,3226874  | 1,004030605 | 0,237510694 | 4,227306941 | 2,36505E-05 | 0,001132234 | 2,005595417 |
| FRMD6     | 717,6468509 | 416,7567681  | 772,9056681 | 1433,955143 | 1252,537292  | 1378,606064 | 939,2946041  | 1,094010736 | 0,259581815 | 4,214512235 | 2,50319E-05 | 0,001176497 | 2,134666561 |
| MGLL      | 402,66793   | 346,8872745  | 427,1585292 | 576,2911181 | 756,0117559  | 616,8859819 | 764,1803503  | 0,729855947 | 0,173418742 | 4,208633612 | 2,5692E-05  | 0,001198772 | 1,658473485 |
| CDA       | 1022,804603 | 794,6424799  | 1073,424257 | 1680,233399 | 1749,062827  | 1576,188386 | 658,3102018  | 0,79340608  | 0,188802318 | 4,202311117 | 2,64204E-05 | 0,001228309 | 1,733161483 |
| MBP       | 35,07560366 | 33,95066942  | 32,16252455 | 67,11082465 | 52,07681929  | 70,62897474 | 165,5144344  | 0,90735392  | 0,215991858 | 4,200870937 | 2,6589E-05  | 0,001231703 | 1,875602257 |
| C16orf74  | 242,7231773 | 265,2088524  | 294,4881154 | 603,3817262 | 590,8025361  | 556,985459  | 367,7822416  | 1,127131796 | 0,268445307 | 4,198739056 | 2,68405E-05 | 0,001238898 | 2,184240622 |
| ARHGD1B   | 1740,451454 | 1508,098576  | 2065,437123 | 2824,811592 | 2603,840965  | 2688,371228 | 2069,51917   | 0,61273442  | 0,146047054 | 4,195458942 | 2,7232E-05  | 0,001252476 | 1,529154756 |
| ZC3HAV1L  | 4,209072439 | 34,444270811 | 2,010157784 | 16,00808661 | 17,0596477   | 8,940376549 | 67,82308783  | 2,078017351 | 0,496106995 | 4,188647551 | 2,80622E-05 | 0,001281506 | 4,22226565  |
| USB1      | 310,7698484 | 252,4158466  | 373,8893479 | 615,0799433 | 514,4830596  | 637,4488479 | 713,1523487  | 0,919750242 | 0,219709849 | 4,186203962 | 2,83658E-05 | 0,001290796 | 1,891787761 |
| EFHD2     | 1551,744706 | 527,9575114  | 1476,460893 | 3409,106753 | 4621,368774  | 3437,574783 | 3556,551908  | 1,689850239 | 0,403862813 | 4,184218462 | 2,86149E-05 | 0,001292042 | 3,226232117 |
| SFMBT1    | 143,1084629 | 112,6768594  | 131,6653349 | 202,5638652 | 205,6136486  | 225,297489  | 191,5389921  | 0,713877543 | 0,170986908 | 4,175042123 | 2,97931E-05 | 0,001336848 | 1,640206595 |
| RP52      | 16477,11557 | 18819,98775  | 18287,41044 | 28217,94683 | 25575,10553  | 25777,7877  | 15777,151604 | 0,570439585 | 0,137061298 | 4,161930417 | 3,15569E-05 | 0,001401342 | 1,484975969 |
| GMFG      | 53,31491756 | 38,3790176   | 30,15236677 | 108,3624325 | 106,8472672  | 92,08587845 | 36,46018386  | 1,326769998 | 0,320300381 | 4,142267942 | 3,43888E-05 | 0,001516641 | 2,508404474 |
| FGD6      | 126,2721732 | 127,43802    | 98,49773143 | 235,1957341 | 187,6561247  | 229,7676773 | 197,5794046  | 0,883700988 | 0,213562542 | 4,137902545 | 3,50495E-05 | 0,001540504 | 1,845102531 |
| TNRC6A    | 325,501602  | 339,9987329  | 307,554141  | 526,4197713 | 569,2535074  | 548,0450824 | 386,6944648  | 0,754417162 | 0,183438108 | 4,112652317 | 3,91139E-05 | 0,00169599  | 1,686949939 |
| SPP1      | 14,03024146 | 9,840773745  | 20,10157784 | 22,78073864 | 34,1192954   | 49,17207102 | 67,0097717   | 1,316021202 | 0,320468167 | 4,106558274 | 4,01598E-05 | 0,001726892 | 2,489785061 |
| SEPT11    | 1249,393002 | 1306,362715  | 1351,83111  | 2290,387777 | 2079,481267  | 1962,412652 | 2281,384469  | 0,696898885 | 0,169974774 | 4,1000136   | 4,13126E-05 | 0,001761667 | 1,621016622 |
| HIST1H2AL | 1204,49623  | 1331,456688  | 1391,029187 | 2090,90239  | 1802,935399  | 1977,611293 | 2113,953145  | 0,581007457 | 0,141828277 | 4,096555843 | 4,19342E-05 | 0,001776412 | 1,495893491 |
| VPS33A    | 380,2195437 | 312,4445664  | 365,8487168 | 754,2271577 | 653,6538697  | 812,6802283 | 405,5950314  | 1,069928916 | 0,261834301 | 4,086282475 | 4,3834E-05  | 0,001838744 | 2,099329927 |
| SRGN      | 1715,898531 | 3146,095366  | 1692,552854 | 4266,770778 | 4296,337592  | 4418,33409  | 2118,011051  | 0,98503211  | 0,241379859 | 4,080838044 | 4,48736E-05 | 0,001876242 | 1,979357367 |
| ANKRD10   | 39,2846761  | 47,72775266  | 45,22855015 | 86,19738946 | 78,11522894  | 77,78127597 | 104,29572    | 0,872289627 | 0,214731648 | 4,062231318 | 4,86059E-05 | 0,002006239 | 1,830565793 |
| RIN2      | 1505,444909 | 1141,037716  | 1942,817499 | 2597,619901 | 2823,820632  | 2521,186187 | 1539,030304  | 0,792849854 | 0,195142757 | 4,062922276 | 4,84622E-05 | 0,002006239 | 1,732493397 |

|          |              |             |             |             |             |             |             |             |             |             |             |             |              |
|----------|--------------|-------------|-------------|-------------|-------------|-------------|-------------|-------------|-------------|-------------|-------------|-------------|--------------|
| COL17A1  | 120,6600766  | 127,43802   | 103,5231259 | 206,2580391 | 186,7582485 | 233,3438279 | 373,1958131 | 0,825817486 | 0,203704763 | 4,053992035 | 5,03509E-05 | 0,00206503  | 1,772539142  |
| COMMD8   | 119,2570524  | 88,07492501 | 98,49773143 | 267,827603  | 215,4902867 | 294,1383885 | 234,7533311 | 1,34737182  | 0,335410472 | 4,017083347 | 5,89229E-05 | 0,002338242 | 2,544481709  |
| DPP4     | 77,16632805  | 133,3424842 | 68,34536467 | 202,5638652 | 200,2263914 | 210,0988489 | 238,8325291 | 1,120894159 | 0,279055989 | 4,016735715 | 5,90098E-05 | 0,002338242 | 2,174817225  |
| L1CAM    | 80,67388841  | 58,06056509 | 68,34536467 | 145,9198664 | 127,4984196 | 158,2446649 | 53,44006971 | 1,064328705 | 0,265919623 | 4,002445146 | 6,26912E-05 | 0,002455122 | 2,091196606  |
| PAWR     | 244,1262015  | 298,6674832 | 225,1376719 | 487,0152504 | 488,4446499 | 551,6212331 | 371,984813  | 0,988462557 | 0,247016172 | 4,001610709 | 6,29127E-05 | 0,002455122 | 1,984069493  |
| PITHD1   | 531,0446394  | 361,6484351 | 463,3413693 | 850,2756774 | 699,4455557 | 794,7994752 | 497,6240691 | 0,792324494 | 0,197978055 | 4,002082416 | 6,27874E-05 | 0,002455122 | 1,731862622  |
| PABPC1   | 12823,6407   | 9881,612956 | 13775,6113  | 21680,49054 | 19915,79187 | 19701,9078  | 21615,21398 | 0,748844742 | 0,187231865 | 3,999558202 | 6,34608E-05 | 0,002469029 | 1,680446651  |
| ATG2B    | 347,2484762  | 331,1420365 | 324,6404822 | 509,7959891 | 441,7550878 | 526,5881787 | 434,1590102 | 0,559507328 | 0,140331005 | 3,987054225 | 6,68987E-05 | 0,002564053 | 1,473765849  |
| FRS2     | 246,9322498  | 120,5494784 | 213,0767251 | 503,6390327 | 387,8825161 | 476,5220701 | 315,9052396 | 1,240943218 | 0,31166814  | 3,981617172 | 6,8448E-05  | 0,002607908 | 2,363530067  |
| METRN    | 14,03024146  | 12,79300587 | 15,07618338 | 41,25160781 | 30,52779062 | 46,48995805 | 32,99712477 | 1,510948378 | 0,379415838 | 3,982301808 | 6,8251E-05  | 0,002607908 | 2,84997325   |
| PM20D2   | 35,77711573  | 23,1258183  | 32,16252455 | 74,49917232 | 61,05558124 | 107,2845186 | 125,7110106 | 1,424939087 | 0,358370581 | 3,976160886 | 7,00368E-05 | 0,00266057  | 2,685031636  |
| LGALS3   | 589,9716535  | 681,9656205 | 539,7273651 | 1119,334672 | 870,9399088 | 1108,606692 | 500,3612977 | 0,773130689 | 0,194726897 | 3,970333324 | 7,17722E-05 | 0,002718476 | 1,708974285  |
| PARD6B   | 108,0328593  | 128,9141361 | 79,40123248 | 272,1374724 | 211,8987819 | 239,6020915 | 172,6691595 | 1,186658595 | 0,298957568 | 3,969321139 | 7,20777E-05 | 0,002722042 | 2,276249334  |
| FLI1     | 491,7599633  | 416,7567681 | 450,2753437 | 805,9455914 | 695,8540509 | 782,282948  | 348,2047301 | 0,750321738 | 0,189883084 | 3,951493315 | 7,7665E-05  | 0,002907472 | 1,682167932  |
| AJUBA    | 351,4575487  | 257,8282721 | 432,1839236 | 560,2830315 | 600,6791742 | 683,0447683 | 644,1412818 | 0,829146261 | 0,209988896 | 3,948524315 | 7,86344E-05 | 0,002928564 | 1,776633699  |
| DDIT4    | 426,5193405  | 582,081767  | 517,6156295 | 814,5653304 | 862,8590231 | 746,5214418 | 1009,659699 | 0,666283181 | 0,168788932 | 3,947434075 | 7,89933E-05 | 0,002931629 | 1,586979157  |
| PDHX     | 425,8178284  | 177,6259661 | 360,8233223 | 778,8549833 | 832,3312325 | 738,4751029 | 505,6616949 | 1,28747552  | 0,32688295  | 3,938643843 | 8,19435E-05 | 0,003015051 | 2,441005456  |
| DUSP22   | 43,49374854  | 48,21979135 | 53,26918129 | 92,97004149 | 94,27700044 | 97,45010438 | 111,9505657 | 0,978755575 | 0,248632124 | 3,936561216 | 8,26575E-05 | 0,00303266  | 1,970764754  |
| IL6ST    | 53,31491756  | 14,26912193 | 61,30981242 | 153,9239097 | 124,8047911 | 154,6685143 | 112,0975716 | 1,77031915  | 0,450072071 | 3,933412586 | 8,37483E-05 | 0,003063951 | 3,411294124  |
| GAS6     | 277,798781   | 145,6434514 | 289,462721  | 465,4659031 | 529,7469549 | 437,1844132 | 249,6056196 | 1,012688971 | 0,257721054 | 3,92939946  | 8,51583E-05 | 0,003106709 | 2,017668233  |
| KLHL15   | 52,61340549  | 72,82172571 | 37,18791901 | 112,6723019 | 107,7451434 | 106,3904809 | 79,85249971 | 0,978046457 | 0,249308503 | 3,923036897 | 8,74398E-05 | 0,003166519 | 1,969796316  |
| SIK1     | 79,97237634  | 83,15453814 | 65,33012799 | 146,5355621 | 129,294172  | 131,4235353 | 86,11855185 | 0,825499878 | 0,210487901 | 3,921840034 | 8,78753E-05 | 0,003169912 | 1,772148962  |
| CYR61    | 3380,586681  | 1828,415762 | 3911,767048 | 6622,422293 | 8548,67925  | 7189,850821 | 4170,754602 | 1,294070268 | 0,330226953 | 3,918729999 | 8,90168E-05 | 0,003202117 | 2,452189154  |
| RGCC     | 67,34515902  | 46,2516366  | 71,36060135 | 162,5436487 | 120,3154101 | 116,2248951 | 76,40262205 | 1,1261957   | 0,268729486 | 3,912718313 | 9,1263E-05  | 0,003273773 | 2,182823832  |
| KIAA1033 | 65,94213488  | 123,0096718 | 80,40631138 | 195,1755176 | 167,0049722 | 174,3373427 | 134,3979557 | 0,983245953 | 0,252547509 | 3,893310836 | 9,88853E-05 | 0,003517804 | 1,976908301  |
| CDKN1C   | 113,6449559  | 72,32968702 | 136,6907293 | 257,3607771 | 198,430639  | 242,2842045 | 97,42464328 | 1,125357343 | 0,289755561 | 3,883816203 | 0,00010283  | 0,003628055 | 2,181555751  |
| FAM63B   | 115,24062281 | 96,4395827  | 56,28441796 | 251,8195163 | 159,8219627 | 201,1584723 | 121,728294  | 1,484532895 | 0,382504268 | 3,88108845  | 0,00010399  | 0,003635795 | 2,798265583  |
| MTMR9    | 62,2419317   | 78,72618996 | 99,50281033 | 171,7790833 | 156,3881629 | 146,6221754 | 126,2017616 | 0,886114191 | 0,327288052 | 3,879990258 | 0,000104461 | 0,003635795 | 1,848191426  |
| RAB43    | 267,2760999  | 206,6562486 | 273,3814587 | 440,8380775 | 349,2738397 | 440,7605639 | 362,1667684 | 0,725870844 | 0,187012919 | 3,881394119 | 0,000103859 | 0,003635795 | 1,653898666  |
| ZCCHC10  | 51,91189341  | 58,06056509 | 44,22347126 | 107,1310412 | 91,58337186 | 110,8606692 | 89,82757004 | 0,994189434 | 0,256194367 | 3,880606146 | 0,000104196 | 0,003635795 | 1,991961045  |
| RHOF     | 1353,918301  | 1600,109811 | 1618,177016 | 2380,895036 | 2301,256687 | 2175,193614 | 1873,188028 | 0,585062398 | 0,150859002 | 3,878206738 | 0,000105229 | 0,003652676 | 1,500103869  |
| RBMS2    | 515,6113738  | 682,4576592 | 563,8492585 | 1041,757021 | 895,1825661 | 849,3357721 | 955,0344664 | 0,660241227 | 0,17043999  | 3,873745975 | 0,000107175 | 0,003690378 | 1,580346844  |
| NAA30    | 319,1879933  | 263,7327364 | 320,6201666 | 613,2328564 | 597,9855457 | 582,0185133 | 462,6572315 | 0,990564401 | 0,255794817 | 3,87249598  | 0,000107726 | 0,00369947  | 1,986962164  |
| SLC7A6   | 128,3767094  | 85,12269289 | 120,6094671 | 182,2459091 | 188,5540009 | 227,0855643 | 261,3860765 | 0,847115343 | 0,218790978 | 3,871801982 | 0,000108034 | 0,003700154 | 1,798900441  |
| YOD1     | 140,3024146  | 215,0209063 | 114,5789937 | 316,4675584 | 309,7672872 | 352,250836  | 295,7553129 | 1,048995101 | 0,271495378 | 3,863767806 | 0,000111651 | 0,003803826 | 2,069088137  |
| SFXN1    | 1786,75125   | 1335,392997 | 1694,563012 | 2370,42821  | 2707,096727 | 2311,087338 | 1773,915176 | 0,617986252 | 0,160075224 | 3,860599017 | 0,000113109 | 0,003833218 | 1,534731471  |
| MINK1    | 399,8618817  | 397,0752206 | 371,8791901 | 684,0378549 | 540,5214692 | 582,912551  | 526,7745971 | 0,62943058  | 0,163146423 | 3,858071599 | 0,000114285 | 0,003852787 | 1,546954303  |
| MARS2    | 68,74818317  | 53,14017822 | 62,31489132 | 113,2879976 | 125,7026673 | 99,23817969 | 89,89405736 | 0,883714777 | 0,229531273 | 3,850084408 | 0,000118077 | 0,003970228 | 1,845120166  |
| ITGA2    | 2108,04378   | 1533,192549 | 1858,390872 | 3293,355973 | 3189,256244 | 3494,793193 | 1523,919285 | 0,859601096 | 0,223321311 | 3,849167331 | 0,00011852  | 0,003974742 | 1,814536523  |
| ETS1     | 30,86653122  | 20,17358618 | 25,1269723  | 64,03234645 | 51,1789431  | 89,40376549 | 24,57325984 | 1,432228586 | 0,372288505 | 3,847093226 | 0,000119527 | 0,003998117 | 2,6989632616 |
| BCAP31   | 119,2570524  | 98,40773745 | 130,660256  | 203,1795609 | 210,1030296 | 172,5492674 | 227,1666936 | 0,760993961 | 0,198153494 | 3,84042665  | 0,000122821 | 0,004066027 | 1,694657776  |
| COL13A1  | 75,06179183  | 88,07492501 | 53,26918129 | 157,6180836 | 121,2132863 | 151,9864013 | 71,62691267 | 0,978918025 | 0,255075946 | 3,837751227 | 0,000124166 | 0,004096713 | 1,970986677  |
| AXL      | 1008,072849  | 1343,265616 | 1047,292206 | 1948,061002 | 1887,335761 | 2353,107108 | 2636,311925 | 0,863823839 | 0,225303444 | 3,834046314 | 0,000126052 | 0,004124007 | 1,81985542   |
| DUSP5    | 346,5469641  | 536,8142078 | 358,8131645 | 668,6454639 | 788,3352989 | 692,8791825 | 502,2727831 | 0,787066402 | 0,205434889 | 3,831220709 | 0,000127509 | 0,004157118 | 1,725562108  |
| MCFD2    | 1846,379777  | 1323,584069 | 2044,330467 | 2875,298634 | 2851,654794 | 2955,688487 | 2329,037752 | 0,736713621 | 0,193170525 | 3,813799336 | 0,000136847 | 0,004427916 | 1,666375601  |
| STK17B   | 120,6600766  | 106,7723951 | 114,5789937 | 205,0266478 | 204,7157724 | 194,9002088 | 239,7593244 | 0,824269512 | 0,216862098 | 3,80089245  | 0,000144176 | 0,004630167 | 1,770638273  |
| WASF3    | 69,44969524  | 103,3281243 | 95,48249476 | 173,6261702 | 152,6389531 | 202,9465477 | 73,90080875 | 0,978342838 | 0,257505769 | 3,799304548 | 0,000145103 | 0,00464834  | 1,970201023  |
| FAM20B   | 260,9624912  | 168,277231  | 238,2036974 | 419,2887301 | 325,9290587 | 429,1380743 | 371,5447636 | 0,820579482 | 0,216130402 | 3,796686971 | 0,000146643 | 0,004662878 | 1,766115239  |
| C15orf52 | 185,1991873  | 256,352156  | 193,9802262 | 352,1779055 | 359,1504779 | 300,396652  | 271,1821219 | 0,664572994 | 0,175594711 | 3,784698233 | 0,000153895 | 0,004857506 | 1,58509905   |
| SERPINE1 | 2841,123896  | 980,141065  | 2753,916165 | 4971,126589 | 5878,395447 | 5003,034717 | 2243,600755 | 1,270114183 | 0,336284769 | 3,776900713 | 0,000158792 | 0,004975483 | 2,411806531  |

|          |             |             |             |             |              |             |             |             |             |             |             |             |             |
|----------|-------------|-------------|-------------|-------------|--------------|-------------|-------------|-------------|-------------|-------------|-------------|-------------|-------------|
| LAPTM5   | 4060,35188  | 2795,763821 | 3472,547573 | 5482,769665 | 5578,504798  | 5824,655322 | 3749,089978 | 0,709373316 | 0,188427273 | 3,764706169 | 0,000166745 | 0,005211997 | 1,635093704 |
| ZNF121   | 449,6692389 | 358,2041643 | 416,1026614 | 600,9189436 | 564,7641265  | 614,2038689 | 481,4320874 | 0,542935414 | 0,144380327 | 3,760452858 | 0,000169606 | 0,005253789 | 1,456933889 |
| C21orf7  | 75,7633039  | 132,3584069 | 101,5129681 | 192,0970394 | 185,8603723  | 201,1584723 | 152,771516  | 0,895899766 | 0,239268478 | 3,744328445 | 0,000180877 | 0,005532857 | 1,860770031 |
| NOTCH2   | 3243,090314 | 2694,403851 | 3074,536331 | 4256,303952 | 4379,840078  | 4033,897899 | 3636,781198 | 0,491885554 | 0,131465812 | 3,741547302 | 0,000182891 | 0,005570938 | 1,406281638 |
| TENM2    | 41,38921232 | 28,53824386 | 28,14220898 | 58,4910857  | 66,44283841  | 57,21840991 | 145,0198498 | 0,889587891 | 0,238198035 | 3,734656713 | 0,000187971 | 0,005695755 | 1,852646836 |
| PPP2R5C  | 148,7205595 | 62,98095197 | 120,6094671 | 268,4432986 | 251,4053345  | 239,6020915 | 132,113663  | 1,199698911 | 0,321896948 | 3,72696578  | 0,000193799 | 0,005844825 | 2,296917296 |
| SLC35G1  | 61,73306244 | 72,32968702 | 57,28949685 | 128,0646929 | 140,0686864  | 118,9070081 | 92,98871322 | 1,008097047 | 0,270447926 | 3,727508881 | 0,000193382 | 0,005844825 | 2,011256449 |
| SMAD5    | 834,097855  | 567,3206064 | 837,2307172 | 1371,769884 | 1203,154101  | 1242,71234  | 1080,529801 | 0,772129079 | 0,207498447 | 3,721131854 | 0,000198332 | 0,005939808 | 1,707788219 |
| EHF      | 16,83628976 | 28,53824386 | 17,08634117 | 50,4870424  | 56,56620027  | 68,84089943 | 20,28005142 | 1,46568379  | 0,394279082 | 3,717376488 | 0,000201302 | 0,005959056 | 2,761943467 |
| FAM82A2  | 163,452313  | 136,7867551 | 221,1173563 | 328,7814712 | 333,1120682  | 272,6814847 | 173,1907662 | 0,851788901 | 0,229103943 | 3,717914626 | 0,000200874 | 0,005959056 | 1,804737361 |
| NFIA     | 150,1235837 | 173,1976179 | 143,7262816 | 239,5056036 | 240,6308202  | 233,3438279 | 200,1008386 | 0,604192219 | 0,16261874  | 3,71539109  | 0,00020289  | 0,005959056 | 1,520127379 |
| NBN      | 320,5910174 | 532,3858596 | 288,4576421 | 818,8751998 | 696,7519271  | 748,3095171 | 786,2019891 | 0,984415538 | 0,265197835 | 3,712004426 | 0,000205624 | 0,00604605  | 1,97851162  |
| AHNAK    | 1226,243104 | 1019,50416  | 1299,567008 | 1573,718053 | 1797,548142  | 1740,691314 | 2140,004212 | 0,529175678 | 0,142778873 | 3,70626038  | 0,000210342 | 0,006087157 | 1,443104404 |
| SLC35D1  | 97,51017817 | 93,48735057 | 85,43170584 | 137,3001275 | 162,5155912  | 148,4102507 | 115,6862471 | 0,689514556 | 0,186126819 | 3,704541662 | 0,000211773 | 0,006114835 | 1,612740766 |
| KLHL28   | 42,79223646 | 56,09241034 | 35,17776123 | 83,11891126 | 94,27700044  | 89,40376549 | 68,39741516 | 0,967194142 | 0,261191349 | 3,703009865 | 0,000213057 | 0,006122543 | 1,955034602 |
| MTOR     | 955,4594437 | 446,2790893 | 898,5405296 | 1587,263357 | 1352,201549  | 1588,704913 | 875,021062  | 0,978948332 | 0,264616719 | 3,699495385 | 0,000216029 | 0,00616855  | 1,971028083 |
| C4orf29  | 123,4661249 | 100,3758922 | 116,5891515 | 180,3988222 | 184,0646199  | 177,0194557 | 140,7596026 | 0,67532935  | 0,182641012 | 3,697577783 | 0,000217667 | 0,00618788  | 1,596961298 |
| SFN      | 238,5141049 | 334,0942686 | 247,2494075 | 430,3712516 | 437,2657068  | 438,9724885 | 251,4870833 | 0,666619054 | 0,180352559 | 3,696199593 | 0,000218851 | 0,006207847 | 1,587348664 |
| FAM73A   | 72,25574354 | 104,3122017 | 68,34536467 | 171,1633876 | 152,6389531  | 199,370397  | 94,75174641 | 1,084979828 | 0,293738778 | 3,693689461 | 0,000221024 | 0,006255699 | 2,121345822 |
| ADRB2    | 25,25443643 | 64,94910671 | 33,16760344 | 105,2839543 | 87,99186708  | 101,9202927 | 74,90783279 | 1,235287452 | 0,335166933 | 3,685588673 | 0,000228175 | 0,006429831 | 2,35428251  |
| TM4SF1   | 1290,782215 | 724,2809476 | 1347,810794 | 2039,183956 | 2347,048373  | 2065,226983 | 5580,810857 | 0,941091607 | 0,255885597 | 3,677782644 | 0,00023527  | 0,006615308 | 1,919980432 |
| CAPRIN2  | 61,03155037 | 52,64813953 | 68,34536467 | 124,3705191 | 105,949391   | 118,9070081 | 87,16244203 | 0,952028633 | 0,259752436 | 3,665138421 | 0,000247205 | 0,006920661 | 1,934591055 |
| RG517    | 45,59828476 | 29,52232123 | 39,1980768  | 108,9781281 | 64,64708602  | 72,41705005 | 70,4186451  | 1,124935016 | 0,307123557 | 3,662809281 | 0,000249464 | 0,006968766 | 2,180917228 |
| RASSF7   | 156,4371923 | 115,1370528 | 150,7618338 | 264,1334291 | 188,5540009  | 266,4232212 | 210,5680958 | 0,775959637 | 0,212131803 | 3,657912806 | 0,000254278 | 0,00707254  | 1,712328662 |
| ARHGEF10 | 98,21169024 | 81,67842208 | 97,49265254 | 161,9279531 | 146,3538197  | 133,2116106 | 130,740848  | 0,682756663 | 0,186777875 | 3,655447214 | 0,000256734 | 0,007106658 | 1,605204007 |
| DDX1     | 522,6264945 | 397,0752206 | 540,732444  | 1178,441453 | 797,3140609  | 1029,037341 | 728,6560581 | 1,042491818 | 0,285264672 | 3,654472222 | 0,000257712 | 0,007106658 | 2,059782232 |
| PITRM1   | 147,3175354 | 115,1370528 | 126,6399404 | 338,6326014 | 224,4690487  | 313,8072169 | 288,7444026 | 1,174154095 | 0,322186803 | 3,644327087 | 0,000268092 | 0,007345729 | 2,256605291 |
| GABBR2   | 52,61340549 | 101,8520083 | 53,26981129 | 179,1674309 | 163,60601911 | 163,6088908 | 57,94783828 | 1,214605739 | 0,32379826  | 3,639379075 | 0,000273296 | 0,007456587 | 2,320773518 |
| SLC25A40 | 28,06048293 | 14,76116062 | 26,1320512  | 70,18930284 | 46,68956212  | 63,4766735  | 55,04289238 | 1,412721384 | 0,388894054 | 3,632663878 | 0,00028051  | 0,0075891   | 2,662389011 |
| DONSON   | 129,7797335 | 108,2485112 | 134,6805716 | 214,2620824 | 172,3922294  | 246,7543927 | 211,2949183 | 0,771532607 | 0,212860798 | 3,624587597 | 0,000289423 | 0,007797465 | 1,707082292 |
| PLAG1    | 18,2393139  | 3,936309498 | 19,09649895 | 76,96195487 | 40,40442876  | 49,17207102 | 18,2130394  | 2,056156507 | 0,567538596 | 3,622936873 | 0,000291277 | 0,00779847  | 4,158768869 |
| SIGLEC15 | 424,4148043 | 525,497318  | 413,0874247 | 750,5329839 | 814,3737086  | 633,8726973 | 1161,735229 | 0,687639108 | 0,189769661 | 3,62354607  | 0,000290591 | 0,00779847  | 1,610645627 |
| IL1RAP   | 58,22550207 | 72,82172571 | 57,28949685 | 148,9983446 | 115,8260291  | 148,4102507 | 89,16373909 | 1,128541672 | 0,31172469  | 3,620315329 | 0,000294244 | 0,00786157  | 2,186376218 |
| SRPRB    | 445,4601665 | 355,2519322 | 505,5546828 | 699,4302459 | 668,917765   | 664,2699776 | 633,425532  | 0,642382854 | 0,177772052 | 3,61351993  | 0,000302068 | 0,008053899 | 1,56090513  |
| TNKS2    | 447,5647027 | 278,9859357 | 482,4378683 | 736,9876799 | 874,5314136  | 635,6607726 | 647,5039813 | 0,89754506  | 0,249117507 | 3,602898364 | 0,000314689 | 0,0083386   | 1,862893321 |
| EVIS     | 119,2570524 | 128,9141361 | 108,5485204 | 232,7329515 | 187,6561247  | 269,1053341 | 146,2665315 | 0,947482638 | 0,26310899  | 3,601103253 | 0,00031687  | 0,008347628 | 1,928504668 |
| RUFY2    | 133,988806  | 183,0383917 | 149,7567549 | 276,4473419 | 237,0393154  | 249,4365057 | 245,7170272 | 0,705117165 | 0,195810521 | 3,601017768 | 0,000316974 | 0,008347628 | 1,630277058 |
| ARRB1    | 170,4674338 | 135,310639  | 204,0310151 | 300,4594718 | 307,9715348  | 280,7278236 | 246,816823  | 0,810511995 | 0,225382751 | 3,596158054 | 0,000322952 | 0,008480902 | 1,753833746 |
| SH3RF3   | 66,64364695 | 90,53511845 | 79,40123248 | 138,5315188 | 167,0049722  | 137,6817989 | 114,6858277 | 0,900304911 | 0,250721766 | 3,590852626 | 0,000329598 | 0,008619913 | 1,866460414 |
| TMTC3    | 621,5396968 | 360,6643577 | 546,7629174 | 948,171284  | 1076,553557  | 931,5872364 | 696,4159552 | 0,952680899 | 0,265832886 | 3,583758623 | 0,000338685 | 0,008811286 | 1,935465912 |
| LCN2     | 364,786278  | 474,3252945 | 340,7217445 | 636,6292907 | 805,3949466  | 611,5217559 | 277,6149116 | 0,796286914 | 0,222300795 | 3,582024588 | 0,000340942 | 0,008852111 | 1,73662579  |
| USP46    | 169,0644096 | 120,0574397 | 166,8430961 | 225,9602995 | 268,4649822  | 227,979602  | 192,4404336 | 0,671591467 | 0,187611982 | 3,579683243 | 0,000344011 | 0,008891644 | 1,592829082 |
| RECK     | 11,92570524 | 12,79300587 | 11,05586781 | 50,4870424  | 22,44690487  | 21,45690372 | 48,56974882 | 1,415546839 | 0,39592381  | 3,575301113 | 0,000349825 | 0,008998744 | 2,667608292 |
| WNT7A    | 164,8553372 | 130,3902521 | 211,0665674 | 306,0007326 | 290,9118871  | 325,4297064 | 120,3807629 | 0,873275211 | 0,244441769 | 3,572528601 | 0,000353551 | 0,009051745 | 1,83181678  |
| GLIPR1   | 366,1893022 | 471,8651011 | 309,5642988 | 689,5791157 | 659,0411269  | 641,0249986 | 581,1635603 | 0,790357928 | 0,221636467 | 3,566010318 | 0,000362457 | 0,009261354 | 1,729503494 |
| MCL1     | 955,4594437 | 1501,210035 | 954,8249476 | 2159,244606 | 2024,710819  | 1676,320603 | 1826,74432  | 0,779360388 | 0,218842453 | 3,561285193 | 0,000369044 | 0,009373862 | 1,71636976  |
| MLPH     | 35,77711573 | 27,55416649 | 41,20823458 | 64,03234645 | 64,64708602  | 57,21840991 | 231,2114238 | 0,862403864 | 0,242329999 | 3,558799437 | 0,000372554 | 0,009425833 | 1,818065105 |
| DENR     | 763,9466477 | 744,9465725 | 738,7329858 | 1405,017448 | 1107,979224  | 1426,884097 | 788,74647   | 0,809895378 | 0,228000327 | 3,552167624 | 0,000382071 | 0,009591258 | 1,753084307 |
| FAM13B   | 144,5114871 | 148,5956835 | 127,6450193 | 296,1496023 | 235,243563   | 304,8668403 | 198,4663316 | 0,989193626 | 0,278724581 | 3,549000317 | 0,000386697 | 0,009688481 | 1,98507515  |
| BAG4     | 446,8631906 | 428,5656966 | 346,7522178 | 570,1341617 | 630,3090887  | 582,0185133 | 550,1638628 | 0,540028613 | 0,152245072 | 3,547100771 | 0,000389496 | 0,009720783 | 1,454001354 |

|           |             |             |             |             |             |             |             |             |             |              |             |             |             |
|-----------|-------------|-------------|-------------|-------------|-------------|-------------|-------------|-------------|-------------|--------------|-------------|-------------|-------------|
| DKC1      | 1085,239177 | 1160,227224 | 1157,850884 | 1690,084529 | 1619,768655 | 1642,347172 | 1381,568866 | 0,541278912 | 0,152822266 | 3,54188514   | 0,000397278 | 0,009895844 | 1,455261997 |
| IMPAD1    | 1701,166777 | 1113,483549 | 1549,831652 | 2433,844861 | 2728,645756 | 2669,596437 | 1905,585189 | 0,844054678 | 0,238958624 | 3,532221035  | 0,000412085 | 0,010146898 | 1,795088134 |
| ITGAV     | 343,0394038 | 586,5101152 | 301,5236677 | 881,0604594 | 692,2625461 | 824,2521178 | 874,2521121 | 0,958292798 | 0,271280402 | 3,532480752  | 0,00041168  | 0,010146898 | 1,943009289 |
| SPSB1     | 866,3674104 | 949,6346664 | 1058,348073 | 1738,724484 | 1458,15094  | 1492,148846 | 1134,655187 | 0,706966128 | 0,200313477 | 3,52929887   | 0,000416662 | 0,010220528 | 1,632367766 |
| PLEKHA6   | 24,55292256 | 34,93474679 | 27,13713009 | 49,87134676 | 59,25982885 | 63,4766735  | 100,0862047 | 0,970025025 | 0,275117006 | 3,525863551  | 0,000422104 | 0,010334335 | 1,958874573 |
| TMEM2     | 286,2169259 | 358,696203  | 249,2595653 | 741,2975493 | 513,5851834 | 667,8461282 | 1166,69927  | 1,10292141  | 0,313253183 | 3,520862575  | 0,000430145 | 0,010451724 | 2,147891935 |
| CHPT1     | 296,0380949 | 222,8935253 | 308,5592199 | 466,6972943 | 472,2828784 | 474,7339947 | 369,5085335 | 0,776354601 | 0,220732016 | 3,517181678  | 0,000436155 | 0,010527187 | 1,712797507 |
| IPO7      | 2737,30011  | 2743,115681 | 2496,615968 | 4135,011911 | 3663,334874 | 3776,415054 | 3057,863363 | 0,536938819 | 0,152676349 | 3,516843455  | 0,000436711 | 0,010527187 | 1,450890678 |
| LOC441666 | 1,403024146 | 0,492038687 | 2,010157784 | 12,31391278 | 8,080885752 | 8,940376549 | 4,759536794 | 3,074370392 | 0,874932077 | 3,513838929  | 0,000441681 | 0,01057242  | 8,4232115   |
| PFKP      | 1939,680882 | 2442,480043 | 2293,590032 | 3418,957883 | 2950,421176 | 3128,237754 | 2913,824343 | 0,508700582 | 0,144750307 | 3,514331621  | 0,000440862 | 0,01057242  | 1,422768149 |
| RFC4      | 315,6804329 | 338,5226168 | 379,9198212 | 446,9950339 | 516,2788119 | 529,2702917 | 479,4997125 | 0,530465079 | 0,151144147 | 3,509663402  | 0,000448674 | 0,010660567 | 1,444394748 |
| FXYD5     | 3492,1271   | 3906,787177 | 3755,97982  | 5302,986538 | 5369,299644 | 5202,405114 | 6645,547341 | 0,508990275 | 0,145270169 | 3,503749459  | 0,000458757 | 0,010860054 | 1,423053869 |
| NRGN      | 42,79223646 | 87,58288633 | 73,37075913 | 152,0768228 | 94,27700044 | 170,7611921 | 97,60928014 | 1,030790561 | 0,294987058 | 3,494358588  | 0,000475202 | 0,011187669 | 2,043143536 |
| NXT1      | 20,34385012 | 16,23727668 | 14,07110449 | 44,94578165 | 38,60867637 | 36,65554385 | 25,14172848 | 1,242627153 | 0,355906477 | 3,491442928  | 0,000480419 | 0,011248795 | 2,366290425 |
| KRT8      | 4857,971107 | 7710,738268 | 5907,853728 | 10284,57995 | 9203,230996 | 10050,77132 | 7648,139186 | 0,676738912 | 0,193907652 | 3,490006214  | 0,000483009 | 0,011268467 | 1,598522346 |
| LAYN      | 340,9348676 | 495,9749967 | 319,6150877 | 741,2975493 | 742,543613  | 618,6740572 | 617,7880165 | 0,859416676 | 0,246623853 | 3,484726501  | 0,00049264  | 0,011410471 | 1,814304586 |
| UBL3      | 216,7672306 | 189,4348946 | 223,1275141 | 371,2644703 | 264,8734774 | 424,6678861 | 371,4562251 | 0,756519247 | 0,217272436 | 3,481892413  | 0,000497884 | 0,011511214 | 1,689409708 |
| C9orf72   | 42,79223646 | 44,28348185 | 36,18284012 | 87,42878073 | 74,52372416 | 105,4964433 | 54,70555583 | 1,109573637 | 0,319557576 | 3,472218221  | 0,000516177 | 0,011786032 | 2,157818673 |
| SH3RF3-   |             |             |             |             |             |             |             |             |             |              |             |             |             |
| AS1       | 35,77711573 | 22,63377961 | 42,21331347 | 47,4085642  | 82,60460991 | 90,29780314 | 56,33973095 | 1,147015031 | 0,330731567 | 3,468114762  | 0,000524123 | 0,011904164 | 2,214552242 |
| B3GNT5    | 98,21169024 | 101,3599696 | 98,49773143 | 184,7086917 | 282,8310013 | 141,2579495 | 112,1169696 | 1,028775255 | 0,296711001 | 3,467263606  | 0,000525786 | 0,01191992  | 2,040291454 |
| LGR5      | 49,10584512 | 47,23571397 | 40,20315569 | 111,4409107 | 75,42160035 | 124,271234  | 52,59066571 | 1,184460606 | 0,341656915 | 3,466812912  | 0,000526668 | 0,01191992  | 2,27278404  |
| CNIH      | 1383,381808 | 1038,20163  | 1361,881899 | 1751,038397 | 2002,263914 | 1879,267151 | 1691,838763 | 0,575012663 | 0,166185285 | 3,460069657  | 0,000540036 | 0,012137137 | 1,489690539 |
| MPP5      | 145,2129991 | 244,0511889 | 168,8532539 | 374,3429485 | 342,9887064 | 325,4297064 | 357,7588989 | 0,897460459 | 0,259356435 | 3,460336195  | 0,000539501 | 0,012137137 | 1,862784082 |
| OGFRL1    | 58,92701415 | 65,93318409 | 65,33012799 | 416,2102519 | 226,2648011 | 362,9792879 | 461,1596991 | 2,40262967  | 0,695475325 | 3,454658398  | 0,00055099  | 0,012361768 | 5,287660941 |
| RPL5      | 12469,3771  | 9782,221141 | 12495,14079 | 17609,51097 | 16093,53291 | 15827,1486  | 12788,38993 | 0,511612384 | 0,148422862 | 3,446991772  | 0,000566866 | 0,012673782 | 1,425642631 |
| MYBBP1A   | 1894,78411  | 1680,312117 | 1869,446739 | 2765,469376 | 2628,083622 | 2366,517672 | 1816,986757 | 0,51021712  | 0,148149966 | 3,443923306  | 0,000573338 | 0,012774136 | 1,424264526 |
| MST1R     | 102,4777627 | 109,7246273 | 118,5993093 | 196,4069088 | 127,7794865 | 178,807531  | 75,40888988 | 0,745854134 | 0,216769998 | 3,440762747  | 0,000580077 | 0,01286645  | 1,672966808 |
| SLC25A36  | 244,1262015 | 157,9444186 | 236,1935397 | 406,3591217 | 369,9249922 | 364,7673632 | 295,576458  | 0,843260387 | 0,245092845 | 3,440575291  | 0,000580479 | 0,01286645  | 1,794100101 |
| FOXN2     | 51,21038134 | 17,71339274 | 45,22855015 | 125,6019104 | 96,07275283 | 126,953347  | 76,98737944 | 1,624487825 | 0,473085588 | 3,433813809  | 0,000595153 | 0,013123936 | 3,083326837 |
| MYCBP2    | 148,7205595 | 158,4364573 | 166,8430961 | 306,6164282 | 228,0605534 | 264,6351458 | 294,1591891 | 0,757438564 | 0,221196121 | 3,424285015  | 0,000616419 | 0,013409203 | 1,69048658  |
| APMAP     | 559,8066344 | 482,1979135 | 515,6054717 | 777,0078964 | 659,0411269 | 678,5745801 | 721,7201871 | 0,443742865 | 0,129647417 | 3,4222689592 | 0,000620048 | 0,013431377 | 1,360128411 |
| EPG5      | 263,0670274 | 182,546353  | 210,0614885 | 403,2806435 | 332,214192  | 430,032112  | 406,5994184 | 0,831484047 | 0,243028737 | 3,42134044   | 0,000623133 | 0,013431377 | 1,779514942 |
| MAGI1     | 57,52399    | 37,88697892 | 59,29965464 | 96,66421532 | 96,97062903 | 97,45010438 | 68,24841587 | 0,929077135 | 0,271573067 | 3,421094531  | 0,000623696 | 0,013431377 | 1,904057616 |
| SLC35A5   | 108,0328593 | 32,96659204 | 88,44694251 | 235,1957341 | 182,2688675 | 241,3901668 | 158,4079532 | 1,529379795 | 0,44712612  | 3,420466233  | 0,000625139 | 0,013439966 | 2,886617187 |
| RTN2      | 14,73175354 | 3,444270811 | 15,07618338 | 36,3260427  | 27,83416204 | 32,18535558 | 24,84447066 | 1,605731723 | 0,469536506 | 3,419822955  | 0,000626619 | 0,013449333 | 3,043500753 |
| DOCK4     | 419,5042198 | 201,2438231 | 417,1077403 | 668,0297683 | 587,2110313 | 615,0979066 | 591,4175358 | 0,854668952 | 0,250021446 | 3,418382567  | 0,000629945 | 0,013475799 | 1,808343756 |
| HIST1H2AD | 86,98749707 | 49,69590741 | 80,40631138 | 145,9198664 | 137,3750578 | 143,9400624 | 121,4826322 | 0,988068285 | 0,289029973 | 3,418566849  | 0,000629519 | 0,013475799 | 1,983527342 |
| GDPD5     | 90,49505744 | 43,29940448 | 91,46217919 | 165,6221269 | 140,9665626 | 147,5162131 | 123,9633251 | 1,027893037 | 0,300759555 | 3,417657125  | 0,000631626 | 0,013489358 | 2,039044183 |
| KCNAB2    | 474,9236735 | 321,3012628 | 556,8137063 | 762,2968893 | 762,2968893 | 750,0975924 | 328,2371629 | 0,761578532 | 0,223025257 | 3,414763603  | 0,000638374 | 0,013597651 | 1,695344458 |
| DLC1      | 568,2247793 | 988,013684  | 563,8492585 | 1163,664758 | 1513,819264 | 1175,659516 | 1035,697949 | 0,859549596 | 0,252024992 | 3,410572853  | 0,000648266 | 0,013730863 | 1,81447175  |
| ARPC1A    | 1106,986051 | 1204,510706 | 1184,988014 | 1453,657404 | 1611,687769 | 1541,320917 | 1259,046637 | 0,397238625 | 0,116568716 | 3,407763571  | 0,000654976 | 0,013827514 | 1,316984736 |
| TYW5      | 16,13477768 | 4,920386872 | 16,08126228 | 51,10273803 | 30,52779062 | 42,01976978 | 25,71203665 | 1,781145343 | 0,52286743  | 3,406495109  | 0,000658027 | 0,013846529 | 3,43698926  |
| HAS2      | 218,1702548 | 162,8648055 | 215,0868829 | 312,7733846 | 318,7460491 | 312,0191416 | 166,8349667 | 0,66784418  | 0,196241065 | 3,403182611  | 0,000666057 | 0,013965924 | 1,588697201 |
| SLC25A24  | 644,6895952 | 246,0193436 | 490,4784994 | 990,6542831 | 878,1229184 | 1046,024056 | 1056,419581 | 1,079222048 | 0,317197066 | 3,402370836  | 0,000668039 | 0,013965924 | 2,112896426 |
| C11orf82  | 115,7494921 | 97,42366007 | 104,5282048 | 184,0929961 | 167,0049722 | 162,7148532 | 135,0428811 | 0,697698189 | 0,205384115 | 3,397040661  | 0,000681188 | 0,014171801 | 1,621914972 |
| ADAMTSL1  | 103,1222748 | 106,2803564 | 91,46217919 | 181,6302135 | 140,9665626 | 156,4565896 | 152,2030983 | 0,669225712 | 0,197224139 | 3,393224145  | 0,000690751 | 0,014324461 | 1,590219275 |
| C20orf197 | 22,44838634 | 34,44270811 | 19,09649895 | 51,10273803 | 57,46407646 | 86,72165252 | 36,02700504 | 1,334075382 | 0,393327187 | 3,391770074  | 0,000694427 | 0,014377539 | 2,521138512 |
| LRP10     | 598,3897984 | 411,8363812 | 583,9508364 | 793,015983  | 848,493004  | 736,6870276 | 1040,034794 | 0,580344216 | 0,171606473 | 3,381831724  | 0,000720042 | 0,014860105 | 1,495205951 |
| CPNE7     | 4,209072439 | 1,476116062 | 1,005078892 | 6,772652029 | 5,387257168 | 15,19864013 | 91,93150411 | 1,988005546 | 0,589061489 | 3,374869321  | 0,000738507 | 0,015168261 | 3,966882173 |

|           |             |             |             |             |             |             |             |             |             |             |             |              |             |
|-----------|-------------|-------------|-------------|-------------|-------------|-------------|-------------|-------------|-------------|-------------|-------------|--------------|-------------|
| AGPAT5    | 368,9953505 | 304,5719474 | 346,7522178 | 539,9650754 | 496,5255357 | 438,9724885 | 381,9776015 | 0,535838727 | 0,158798004 | 3,374341703 | 0,000739925 | 0,015173167  | 1,449784759 |
| C7orf23   | 39,2846761  | 44,28348185 | 37,18791901 | 165,6221269 | 69,13646699 | 111,7547069 | 104,4507829 | 1,520980522 | 0,451109572 | 3,371643205 | 0,000747212 | 0,01525301   | 2,869860322 |
| PION      | 14,03024146 | 16,23727668 | 13,0660256  | 25,2435212  | 31,42566681 | 40,23169447 | 55,27790342 | 1,127950374 | 0,334537365 | 3,371672321 | 0,000747133 | 0,01525301   | 2,185480301 |
| SCML2     | 30,86653122 | 46,2516366  | 46,23362904 | 88,66017201 | 73,62584796 | 74,20512536 | 59,01350558 | 0,944102262 | 0,280017391 | 3,371584378 | 0,000747371 | 0,01525301   | 1,923991283 |
| ITGBL1    | 17,53780183 | 15,2531993  | 21,10665674 | 46,79286856 | 46,68956212 | 35,7615062  | 23,34598859 | 1,284128738 | 0,381094894 | 3,369577394 | 0,000752835 | 0,015340214  | 2,435349345 |
| PLCD3     | 390,7422248 | 367,0608607 | 393,9909257 | 648,3275078 | 659,0411269 | 512,2835762 | 615,00182   | 0,661095032 | 0,196306757 | 3,367663146 | 0,000758082 | 0,015422709  | 1,581282391 |
| KIAA1549L | 560,5081465 | 457,5959791 | 646,2657277 | 806,5612871 | 876,327166  | 786,7531363 | 1159,064297 | 0,572737869 | 0,170171296 | 3,365654972 | 0,000763622 | 0,015510913  | 1,487343495 |
| LOXL4     | 2,806048293 | 0,984077374 | 0           | 10,46682586 | 7,183009557 | 8,046338894 | 8,760668449 | 2,691193405 | 0,801379563 | 3,358200695 | 0,000784516 | 0,015860284  | 6,45847435  |
| ZNF367    | 208,3490857 | 199,767707  | 188,9548317 | 297,9966893 | 380,6995065 | 339,7343089 | 412,8250918 | 0,768062855 | 0,229105499 | 3,352441824 | 0,000801021 | 0,016143263  | 1,702981609 |
| EDC4      | 155,7356802 | 129,4061747 | 156,7923072 | 217,3405606 | 204,7157724 | 222,6153761 | 180,6382889 | 0,55257582  | 0,164851865 | 3,351953714 | 0,000802434 | 0,016146483  | 1,466702042 |
| PTBP3     | 867,0689224 | 461,0402499 | 762,8548792 | 1116,871889 | 1213,928615 | 1188,176043 | 960,7244232 | 0,752727414 | 0,224648938 | 3,35068316  | 0,000806125 | 0,016195437  | 1,684975266 |
| PLXNA2    | 323,3970657 | 203,7040165 | 397,0061624 | 525,8040757 | 644,6751078 | 539,9987435 | 468,4820724 | 0,892709202 | 0,266525867 | 3,349428004 | 0,000809786 | 0,016225658  | 1,856659428 |
| GNG5      | 2007,026041 | 2143,320522 | 2093,579332 | 2861,137634 | 2818,433375 | 2673,172588 | 2218,648918 | 0,419821408 | 0,125415124 | 3,347454386 | 0,000815574 | 0,016276094  | 1,337761943 |
| LINC00641 | 74,36027976 | 84,6306542  | 54,27426018 | 139,1472144 | 120,3154101 | 106,3904809 | 137,0682422 | 0,764597172 | 0,228551061 | 3,345410725 | 0,000821608 | 0,016328192  | 1,698895568 |
| VTA1      | 561,2096585 | 483,1819909 | 552,7933907 | 810,2554609 | 872,7356612 | 774,2366091 | 624,5796731 | 0,622542359 | 0,186183104 | 3,343710282 | 0,00082666  | 0,016378046  | 1,539585896 |
| VEPH1     | 115,04798   | 97,42366007 | 135,6856504 | 207,4894303 | 165,2092198 | 170,7611921 | 387,5798935 | 0,658610282 | 0,197395821 | 3,33649557  | 0,000848418 | 0,016757553  | 1,578561296 |
| GLRX3     | 1188,361452 | 1172,036153 | 1332,734611 | 1954,833654 | 1531,776788 | 1971,353029 | 1424,818928 | 0,564452114 | 0,169282083 | 3,334387811 | 0,000854874 | 0,016823823  | 1,478825795 |
| TGFA      | 61,73306244 | 17,71339274 | 67,34028578 | 120,6763452 | 122,1111625 | 105,4964433 | 218,414797  | 1,270086209 | 0,38098426  | 3,333697328 | 0,000856999 | 0,016823823  | 2,411759767 |
| UACA      | 4575,963253 | 5754,392447 | 4577,129275 | 6861,312201 | 7789,973865 | 7296,241302 | 4343,302554 | 0,557690394 | 0,167271894 | 3,334035274 | 0,000855958 | 0,016823823  | 1,471910953 |
| CD9       | 206,2445495 | 188,9428559 | 246,2443286 | 303,53795   | 333,5787919 | 310,2310662 | 804,4027961 | 0,539192209 | 0,161804713 | 3,332364053 | 0,000861115 | 0,0168278908 | 1,45315864  |
| PCGF3     | 284,8139017 | 235,6865312 | 331,6760344 | 466,0815987 | 359,1504779 | 508,7074256 | 324,8668212 | 0,652264677 | 0,195932869 | 3,329021216 | 0,000871518 | 0,017023611  | 1,571633339 |
| YTHDF2    | 1071,910448 | 731,6615279 | 961,8604998 | 1676,539225 | 1292,94172  | 1814,002402 | 1112,702035 | 0,791391545 | 0,237693854 | 3,329457337 | 0,000870154 | 0,017023611  | 1,730743038 |
| ZNF185    | 126,2721732 | 86,10677027 | 119,6043882 | 189,0185612 | 229,8563058 | 174,3373427 | 98,71869013 | 0,843367451 | 0,253734564 | 3,323817767 | 0,000887942 | 0,017169545  | 1,794233248 |
| SH3BGR2   | 7,716632805 | 8,364657683 | 9,04571003  | 17,85517353 | 23,34478106 | 19,66882841 | 37,23624341 | 1,274920821 | 0,384257007 | 3,317885676 | 0,000907016 | 0,01743366   | 2,419855366 |
| ALOX5AP   | 62,43457451 | 136,2947164 | 90,4571003  | 216,1091693 | 192,1455057 | 148,4102507 | 738,2960957 | 0,93787641  | 0,282942305 | 3,314726694 | 0,000917328 | 0,017579383  | 1,915706319 |
| G3BP1     | 6461,627706 | 3121,985471 | 6953,135776 | 11793,64996 | 10416,26173 | 9795,076547 | 7782,869191 | 0,952890756 | 0,288148556 | 3,306942676 | 0,000943202 | 0,017968276  | 1,93574747  |
| OSBPL8    | 1295,692799 | 701,1551293 | 1188,003251 | 2045,956608 | 1810,118408 | 1859,598322 | 1305,788624 | 0,844840526 | 0,25564303  | 3,304766514 | 0,000950556 | 0,018081616  | 1,796066199 |
| AGPAT2    | 291,1275104 | 393,1389111 | 454,2956593 | 664,9512901 | 527,0533263 | 629,402509  | 502,1561806 | 0,680638469 | 0,20612385  | 3,302084974 | 0,00095969  | 0,018201601  | 1,602848944 |
| LUZP1     | 1160,300969 | 1398,373949 | 1198,054039 | 1729,48905  | 1863,093104 | 1693,307318 | 1292,581707 | 0,491675134 | 0,148973128 | 3,300428336 | 0,000965374 | 0,018228859  | 1,406076544 |
| RASA3     | 371,0998867 | 204,6880939 | 350,7725334 | 571,9812486 | 458,8147355 | 558,7735343 | 743,4421121 | 0,783479213 | 0,237455407 | 3,299479347 | 0,000968644 | 0,018263824  | 1,721276914 |
| APLN      | 10,5226811  | 3,936309498 | 3,015236677 | 20,31795609 | 11,67239053 | 26,82112965 | 17,82816957 | 1,738839293 | 0,528384034 | 3,29086267  | 0,000998807 | 0,018777564  | 3,33766531  |
| SPOCD1    | 519,1189341 | 250,4476918 | 471,3820004 | 808,408374  | 738,054232  | 749,2035548 | 451,5316889 | 0,890409785 | 0,27082863  | 3,287723989 | 0,001010008 | 0,01890845   | 1,853702577 |
| SLC4A7    | 260,9624912 | 205,6721713 | 249,2595653 | 670,4925508 | 499,2191642 | 529,2702917 | 386,3807652 | 1,248097961 | 0,379767259 | 3,286481212 | 0,001014475 | 0,018961414  | 2,375280611 |
| NEK4      | 376,0104712 | 365,0927059 | 339,7166656 | 520,2628149 | 527,9512025 | 446,1247898 | 413,3558383 | 0,46645091  | 0,142106531 | 3,282403044 | 0,001029264 | 0,01918214   | 1,381706229 |
| ALCAM     | 963,8775885 | 1480,54441  | 1062,368389 | 2154,934736 | 1503,04475  | 1950,790163 | 2771,70523  | 0,676778891 | 0,206335086 | 3,279999075 | 0,001038074 | 0,019318382  | 1,598566644 |
| UBE2W     | 110,1373955 | 76,26599652 | 143,7262816 | 355,2563837 | 228,9584296 | 326,323744  | 192,8926657 | 1,468917295 | 0,448237253 | 3,277097752 | 0,001048801 | 0,019435043  | 2,768140739 |
| LIN28B    | 15,43326561 | 9,840773745 | 25,1269723  | 58,4910857  | 40,40442876 | 45,5959204  | 16,24103721 | 1,562404595 | 0,477431448 | 3,272521329 | 0,001065928 | 0,019666224  | 2,953456975 |
| NRARP     | 7,015120732 | 4,428348185 | 8,040631138 | 22,78073864 | 23,34478106 | 19,66882841 | 11,2251753  | 1,798718624 | 0,550347465 | 3,268332714 | 0,001081831 | 0,019817668  | 3,479110797 |
| HSPA5     | 6728,903806 | 3947,626388 | 6092,788244 | 9776,015356 | 9132,298776 | 8572,033035 | 7969,300384 | 0,712827261 | 0,218232173 | 3,266371094 | 0,001089354 | 0,01992713   | 1,639012958 |
| RPL32     | 11222,79015 | 9917,53178  | 11869,98172 | 18447,47273 | 16475,1303  | 16814,16618 | 13707,58914 | 0,648361006 | 0,198557845 | 3,26535074  | 0,001093286 | 0,019970692  | 1,567386532 |
| SGK196    | 326,203114  | 425,1214258 | 315,5947721 | 522,1099019 | 529,7469549 | 573,9721744 | 502,404826  | 0,603289084 | 0,185117548 | 3,258951354 | 0,001118248 | 0,020254294  | 1,519176069 |
| LSM6      | 117,1525162 | 78,72618996 | 117,5942304 | 165,6221269 | 170,596477  | 169,8671544 | 150,8518123 | 0,702790517 | 0,215963193 | 3,254214327 | 0,001137065 | 0,020537332  | 1,627650014 |
| SLC17A9   | 108,0328593 | 108,7405499 | 108,5485204 | 161,9279531 | 186,7582485 | 187,7479075 | 71,81300321 | 0,719370602 | 0,221053385 | 3,254284481 | 0,001136784 | 0,020537332  | 1,646463582 |
| PANX1     | 138,1978784 | 92,99531189 | 124,6297826 | 255,5136902 | 221,7754201 | 201,1584723 | 177,3270146 | 0,936523027 | 0,287988529 | 3,251945594 | 0,00114618  | 0,02067297   | 1,91391005  |
| C10orf116 | 70,15120732 | 115,1370528 | 86,43678473 | 168,0849094 | 139,1708102 | 158,2446649 | 193,9259463 | 0,769251843 | 0,236783753 | 3,248752645 | 0,001159122 | 0,020848012  | 1,704385689 |
| ZNF483    | 16,83628976 | 6,888541621 | 21,10665674 | 32,01617323 | 47,58743832 | 29,50324261 | 31,25312149 | 1,338194966 | 0,413146195 | 3,239034955 | 0,001199349 | 0,02148152   | 2,528347855 |
| CAPN2     | 1940,382394 | 1681,788233 | 1901,609264 | 2588,384466 | 3039,310919 | 3288,270495 | 3161,06042  | 0,690780327 | 0,213540841 | 3,234886238 | 0,001216912 | 0,021735636  | 1,61415635  |
| SLC35F5   | 537,3582481 | 738,5500695 | 467,3616849 | 910,61385   | 817,9652134 | 923,5408975 | 879,3349225 | 0,601727153 | 0,186080055 | 3,233700421 | 0,001221976 | 0,021765701  | 1,517532226 |
| SIRPB1    | 457,3858717 | 467,4367529 | 505,5546828 | 763,4625923 | 707,5264414 | 686,620919  | 379,3355776 | 0,594419578 | 0,184286661 | 3,225516023 | 0,001257458 | 0,022274476  | 1,509865018 |
| ENC1      | 1286,573142 | 861,0677027 | 1189,008329 | 1643,907356 | 1705,066894 | 1603,903553 | 1095,125135 | 0,571157203 | 0,177160691 | 3,223949951 | 0,001264355 | 0,022365883  | 1,485714802 |



|          |             |             |             |             |             |             |             |             |             |             |             |             |             |
|----------|-------------|-------------|-------------|-------------|-------------|-------------|-------------|-------------|-------------|-------------|-------------|-------------|-------------|
| C1orf106 | 49,10584512 | 38,87105629 | 43,21839236 | 65,26373773 | 66,44283841 | 72,41705005 | 238,7242004 | 0,643400038 | 0,199608955 | 3,223302478 | 0,001267217 | 0,022385755 | 1,562006046 |
| SGMS2    | 260,9624912 | 193,8632428 | 279,411932  | 384,8097744 | 338,4993254 | 376,3898527 | 466,9772159 | 0,590522324 | 0,183647322 | 3,215523748 | 0,001302067 | 0,022690151 | 1,505791816 |
| NUP155   | 1072,61196  | 773,976855  | 1277,455272 | 1724,398442 | 1814,607789 | 1724,598636 | 1070,802854 | 0,747980952 | 0,233442353 | 3,204135593 | 0,001354687 | 0,023543393 | 1,679440812 |
| INIP     | 231,4989841 | 253,8919626 | 207,0462518 | 319,5460366 | 357,3547255 | 312,9131792 | 324,6961493 | 0,50894244  | 0,158867665 | 3,203562154 | 0,001357387 | 0,023558537 | 1,423006686 |
| ANKRD1   | 16,83628976 | 3,444270811 | 12,06094671 | 52,33412931 | 45,79168593 | 28,60920496 | 13,98194457 | 2,00130731  | 0,62629349  | 3,195478387 | 0,001395992 | 0,024098646 | 4,003626275 |
| TNFAIP3  | 565,418731  | 692,2984329 | 601,0371775 | 1027,596021 | 861,9611469 | 1080,891525 | 467,1057955 | 0,675701619 | 0,211582849 | 3,193555719 | 0,001405322 | 0,024194838 | 1,597373426 |
| CFL1     | 20223,19005 | 19126,52785 | 19784,97799 | 28125,59248 | 24139,40149 | 26412,55444 | 91,161      | 0,411993208 | 0,12912058  | 3,190763285 | 0,001418975 | 0,024379676 | 1,330522777 |
| HSPA8    | 16211,2425  | 14353,75258 | 16362,68436 | 25094,52285 | 19483,01555 | 23314,71396 | 21301,48108 | 0,532887895 | 0,16710669  | 3,188908203 | 0,001428112 | 0,024433504 | 1,446822455 |
| SSR1     | 1495,62374  | 1550,413903 | 1383,993635 | 2467,708121 | 2104,6218   | 2446,981061 | 1917,105127 | 0,663808726 | 0,208127717 | 3,189429721 | 0,001425538 | 0,024433504 | 1,584259565 |
| TMEM170A | 93,30110573 | 55,60037166 | 88,44694251 | 129,2960842 | 146,3538197 | 131,4235353 | 113,2156481 | 0,790564521 | 0,248196031 | 3,185242402 | 0,001446328 | 0,024702669 | 1,729751175 |
| GINM1    | 293,9335587 | 148,1036449 | 241,2189341 | 435,9125124 | 369,027116  | 425,5619237 | 309,8437365 | 0,852895313 | 0,26819411  | 3,180141849 | 0,00147203  | 0,02497602  | 1,806121957 |
| HEXB     | 939,324666  | 1308,822908 | 981,9620777 | 2042,87813  | 1392,605978 | 1786,287234 | 1315,228127 | 0,692418807 | 0,218107836 | 3,174662677 | 0,001500108 | 0,02538553  | 1,615990601 |
| ATP6V1B2 | 933,7125694 | 1229,112641 | 926,6827386 | 1679,617703 | 1501,248998 | 1451,917152 | 1855,248974 | 0,583462393 | 0,183896597 | 3,172774283 | 0,001509899 | 0,025494877 | 1,498441118 |
| SAMD3    | 50,50886927 | 49,20386872 | 68,34536467 | 96,04851968 | 118,5196577 | 122,4831587 | 43,71139728 | 1,011701931 | 0,319978033 | 3,161785582 | 0,00156805  | 0,026259226 | 2,01628829  |
| RAPGEF3  | 50,50886927 | 26,07805042 | 37,18791901 | 72,6520854  | 66,44283841 | 80,46338894 | 52,35365985 | 0,960324591 | 0,304032985 | 3,158619752 | 0,001585182 | 0,026511649 | 1,945747618 |
| BUB3     | 2615,237009 | 2673,246188 | 2797,134557 | 3699,099399 | 3639,990093 | 3174,727712 | 2922,46073  | 0,379283563 | 0,120154707 | 3,156626768 | 0,001596055 | 0,026624347 | 1,300695774 |
| POLQ     | 117,1525162 | 78,23415127 | 121,614546  | 179,7831266 | 163,4134674 | 223,5094137 | 173,0630911 | 0,846163276 | 0,26813497  | 3,155736372 | 0,001600935 | 0,026636743 | 1,797713697 |
| TULP4    | 110,1373955 | 125,9619039 | 116,5891515 | 214,2620824 | 180,4731151 | 206,5226983 | 187,8397255 | 0,76904002  | 0,243678702 | 3,155959114 | 0,001599713 | 0,026636743 | 1,704135462 |
| TBL1X    | 144,5114871 | 140,7230645 | 132,6704138 | 253,6666033 | 223,5711725 | 206,5226983 | 170,5055722 | 0,710718492 | 0,225339051 | 3,153996111 | 0,001610512 | 0,026692635 | 1,636618984 |
| SOWAHC   | 613,823064  | 237,6546859 | 603,0473353 | 849,0442861 | 1187,890206 | 1002,216211 | 833,9431219 | 1,065033304 | 0,337806026 | 3,152795455 | 0,001617151 | 0,026699574 | 2,092218177 |
| ZW10     | 467,9085528 | 214,0368289 | 400,0213991 | 709,8970717 | 564,7641265 | 700,0314838 | 501,3889282 | 0,871144161 | 0,276307862 | 3,152802651 | 0,001617111 | 0,026699574 | 1,829112944 |
| DOCK2    | 136,7948543 | 136,2947164 | 142,7212027 | 216,1091693 | 243,3244488 | 204,734623  | 92,8321583  | 0,676392536 | 0,215053184 | 3,145233772 | 0,001659542 | 0,027247393 | 1,598138604 |
| SNRK     | 110,8389076 | 113,1688981 | 119,6043882 | 254,8979945 | 157,1283341 | 216,3571125 | 150,8238474 | 0,874607728 | 0,278095322 | 3,144992591 | 0,00166091  | 0,027247393 | 1,833509484 |
| PDE2A    | 266,5745878 | 396,0911432 | 266,3459064 | 526,4197713 | 526,1554501 | 479,204183  | 265,831663  | 0,717542855 | 0,238825495 | 3,135764459 | 0,001714068 | 0,028012397 | 1,644379003 |
| ARHGAP12 | 82,07691256 | 60,02871984 | 91,46217919 | 116,9821714 | 122,1111625 | 125,1652717 | 149,2695114 | 0,658863295 | 0,210320087 | 3,132669367 | 0,001732245 | 0,028273568 | 1,578838161 |
| AP2S1    | 3151,893745 | 2812,985175 | 3241,379427 | 4558,610511 | 4465,138316 | 3978,467564 | 4192,029789 | 0,498453622 | 0,159225351 | 3,130491581 | 0,00174514  | 0,028447991 | 1,412698525 |
| AP1S3    | 44,89677268 | 26,07805042 | 54,27426018 | 137,3001275 | 93,37912425 | 93,87395376 | 76,27964963 | 1,389531578 | 0,444499021 | 3,126062176 | 0,001771641 | 0,028698354 | 2,619936014 |
| GSTO1    | 295,3365828 | 353,2837774 | 386,9553735 | 617,5427259 | 588,1089075 | 507,813388  | 651,5215081 | 0,728072608 | 0,232869633 | 3,126165777 | 0,001771017 | 0,028698354 | 2,619936014 |
| GALNT14  | 240,6186411 | 306,5401021 | 290,4677998 | 442,0694688 | 380,6995065 | 366,5554385 | 752,1933413 | 0,50699409  | 0,162350128 | 3,122843793 | 0,001791128 | 0,028796684 | 1,421086222 |
| RBPJ     | 350,7560366 | 489,5784938 | 352,7826912 | 644,0176384 | 596,1897933 | 718,8062745 | 510,0263077 | 0,71267653  | 0,228205947 | 3,122953358 | 0,001790461 | 0,028796684 | 1,638841725 |
| PSMA2    | 1095,060346 | 876,8129407 | 1049,302363 | 1688,853138 | 1503,942626 | 1583,340687 | 1288,370181 | 0,66148092  | 0,212118231 | 3,118453388 | 0,001818026 | 0,029192691 | 1,581705404 |
| INSR     | 38,58316402 | 22,63377961 | 33,16760344 | 52,94982495 | 70,0343319  | 63,4766735  | 37,8480451  | 0,993235324 | 0,318910798 | 3,114461256 | 0,001842812 | 0,029553832 | 1,990644119 |
| BCAR3    | 1050,865086 | 512,7043121 | 1035,231259 | 1463,508534 | 1469,823331 | 1430,460248 | 882,7841331 | 0,74966861  | 0,241005923 | 3,110581682 | 0,001867192 | 0,02972275  | 1,681406563 |
| BMPER    | 4,209072439 | 3,936309498 | 6,030473353 | 6,772652029 | 20,65115248 | 22,35094137 | 12,50643756 | 1,825004894 | 0,586470164 | 3,111846101 | 0,001859214 | 0,02972275  | 3,543082095 |
| DKK3     | 4075,785145 | 4273,355999 | 4378,123654 | 5761,67979  | 5441,12974  | 6088,39643  | 3034,301065 | 0,442179853 | 0,142137201 | 3,11093683  | 0,001864948 | 0,02972275  | 1,35865565  |
| SLC16A6  | 32,26955537 | 15,74523799 | 22,11173563 | 39,40452089 | 56,56620027 | 49,17207102 | 61,24826912 | 1,056815589 | 0,339694683 | 3,111074859 | 0,001864077 | 0,02972275  | 2,0803346   |
| POU2F2   | 336,024283  | 118,5813236 | 328,6607977 | 558,4359446 | 665,3262603 | 523,9060658 | 232,6429667 | 1,161283813 | 0,373584217 | 3,1084927   | 0,001880443 | 0,029859857 | 2,236563644 |
| GADD45B  | 163,452313  | 210,1005194 | 189,9599106 | 287,5298634 | 292,7076395 | 269,1053341 | 239,9120165 | 0,589975426 | 0,18984953  | 3,10759488  | 0,001886164 | 0,029913822 | 1,505221108 |
| AKTIP    | 243,4246894 | 255,3680787 | 198,0005418 | 325,702993  | 327,7248111 | 334,3700829 | 351,733664  | 0,496178209 | 0,159811403 | 3,104773508 | 0,001904248 | 0,030073035 | 1,410472178 |
| GALNT6   | 133,2872939 | 191,895088  | 169,8583328 | 274,600255  | 347,8138297 | 270,8934094 | 238,99246   | 0,678678694 | 0,218585025 | 3,104872772 | 0,001903609 | 0,030073035 | 1,600673092 |
| ORC6     | 295,3365828 | 236,6706086 | 306,5490621 | 389,7353395 | 375,3122494 | 387,1183046 | 484,0262136 | 0,465211486 | 0,149847211 | 3,104572208 | 0,001905544 | 0,030073035 | 1,38051971  |
| ERO1L    | 363,3832539 | 436,4383156 | 301,5236677 | 914,9237195 | 602,4749266 | 810,892153  | 607,5323172 | 1,078970006 | 0,348220969 | 3,098521056 | 0,001944891 | 0,030581578 | 2,11252733  |
| GID8     | 188,7067477 | 86,59880895 | 147,7465972 | 253,6666033 | 337,6014492 | 258,3768823 | 156,6704644 | 1,009616005 | 0,326296042 | 3,094171777 | 0,001973632 | 0,030822887 | 2,013375139 |
| NAP1L5   | 9,821169024 | 8,85669637  | 2,010157784 | 33,86326014 | 12,57026673 | 28,60920496 | 21,97287905 | 1,808140375 | 0,58439719  | 3,094026469 | 0,001974599 | 0,030822887 | 3,50190604  |
| RANBP17  | 156,4371923 | 192,8791654 | 158,802465  | 382,3469918 | 231,6520582 | 301,2906897 | 161,056482  | 0,848689474 | 0,27425994  | 3,094471159 | 0,001971641 | 0,030822887 | 1,800864299 |
| TBC1D2   | 148,0190474 | 184,5145077 | 116,5891515 | 225,9602995 | 248,7117059 | 242,2842045 | 293,6298466 | 0,662987217 | 0,21425081  | 3,094444439 | 0,001971819 | 0,030822887 | 1,583357702 |
| GALC     | 173,2734821 | 154,5001478 | 163,8278594 | 303,53795   | 211,8987819 | 288,7741625 | 197,3084064 | 0,712825821 | 0,230584847 | 3,091381893 | 0,001992272 | 0,031061116 | 1,639011323 |
| TULP3    | 335,322771  | 619,4767072 | 325,6455611 | 632,3194212 | 767,6841465 | 770,6604585 | 676,2442686 | 0,756642812 | 0,244997152 | 3,088373906 | 0,002012551 | 0,031339334 | 1,689554411 |
| ANKRD18A | 37,18013988 | 13,28504456 | 15,07618338 | 46,17717292 | 52,07681929 | 46,48995805 | 84,67632777 | 1,143114344 | 0,37056561  | 3,084782597 | 0,00203701  | 0,031643683 | 2,208572733 |
| PAR5     | 23,85141049 | 15,74523799 | 22,11173563 | 45,56147728 | 36,81292398 | 38,44361916 | 36,50997658 | 0,997828935 | 0,323510038 | 3,084383222 | 0,002039747 | 0,031648022 | 1,996992528 |

|           |             |             |             |             |             |             |             |             |             |             |             |             |             |
|-----------|-------------|-------------|-------------|-------------|-------------|-------------|-------------|-------------|-------------|-------------|-------------|-------------|-------------|
| GLYR1     | 408,9815387 | 395,5991045 | 374,8944268 | 738,8347668 | 536,0320882 | 684,8328436 | 672,9911468 | 0,732712446 | 0,2380114   | 3,078476272 | 0,002080621 | 0,032112245 | 1,661760473 |
| CA13      | 6,313608659 | 18,69747011 | 10,05078892 | 20,31795609 | 35,01717159 | 27,7151673  | 106,232781  | 1,169158466 | 0,379999441 | 3,076737334 | 0,002092796 | 0,032238075 | 2,248804844 |
| STC1      | 3412,856236 | 4218,247666 | 3218,262613 | 5242,648366 | 5063,123862 | 5116,577499 | 2970,520927 | 0,506976644 | 0,260111937 | 3,07050267  | 0,002136988 | 0,021260938 | 1,421069031 |
| SPTY2D1   | 490,3569391 | 255,8601174 | 419,117898  | 616,9270303 | 777,5607846 | 629,402509  | 487,9192845 | 0,798454578 | 0,260240794 | 3,06813765  | 0,002153974 | 0,032865964 | 1,739237049 |
| ATP6V1C1  | 379,5180316 | 417,7408455 | 419,117898  | 725,2894627 | 617,7388219 | 718,8062745 | 629,5332951 | 0,761683634 | 0,249091254 | 3,057849769 | 0,002229313 | 0,033690808 | 1,695468093 |
| CTSB      | 3296,405232 | 5335,667524 | 3206,201666 | 6555,311468 | 5650,334893 | 6172,435969 | 3405,732139 | 0,634064042 | 0,207398307 | 3,057228631 | 0,002233938 | 0,033690808 | 1,551930599 |
| SPTLC1    | 1128,732926 | 885,669637  | 950,804632  | 1517,074054 | 1367,465445 | 1582,446649 | 1236,306413 | 0,591425326 | 0,193430745 | 3,057555954 | 0,0022315   | 0,033690808 | 1,506734607 |
| SSR3      | 3473,186274 | 1396,897833 | 3113,734408 | 4610,328945 | 4905,097652 | 5317,735971 | 5835,565725 | 0,894088112 | 0,292523219 | 3,056468871 | 0,002239607 | 0,033693532 | 1,858434848 |
| GBP3      | 244,1262015 | 258,3203108 | 220,1122774 | 388,5039482 | 337,6014492 | 374,6017774 | 407,4874368 | 0,605193974 | 0,198270083 | 3,05237161  | 0,002270408 | 0,034077294 | 1,521183266 |
| OSBPL3    | 394,2497851 | 150,0717996 | 328,6607977 | 527,035467  | 574,6407646 | 616,8859819 | 511,3217892 | 0,980058929 | 0,321052729 | 3,05264164  | 0,002268367 | 0,034077294 | 1,972545978 |
| MYCT1     | 75,7633039  | 98,89977613 | 82,41646916 | 136,6844319 | 136,4771816 | 179,7015686 | 59,16189427 | 0,810345698 | 0,265644528 | 3,05048895  | 0,002284691 | 0,034203386 | 1,753631596 |
| RPS9      | 5326,581172 | 2478,890906 | 6379,235729 | 9545,745187 | 8743,518384 | 8300,245588 | 8078,224663 | 0,90686632  | 0,297456722 | 3,04873366  | 0,002298081 | 0,034332587 | 1,874968451 |
| CLOCK     | 250,4398101 | 86,10677027 | 242,224013  | 434,0654255 | 420,2060591 | 397,8467564 | 379,5243485 | 1,1184063   | 0,366965437 | 3,047715638 | 0,00230588  | 0,034337157 | 2,171070087 |
| TIAL1     | 512,8053255 | 438,898509  | 434,1940814 | 684,6535505 | 677,896527  | 627,6144337 | 541,1041005 | 0,522030118 | 0,171341901 | 3,046716046 | 0,002313562 | 0,034364527 | 1,435974488 |
| FAM103A1  | 337,4273072 | 241,5909954 | 384,9452157 | 440,8380775 | 571,0492598 | 566,8198732 | 321,1873519 | 0,714832579 | 0,234692544 | 3,045825686 | 0,002320423 | 0,034387123 | 1,641292739 |
| INF2      | 290,4259983 | 239,130802  | 321,6252455 | 408,2062086 | 388,7803923 | 378,177928  | 452,4155374 | 0,47324696  | 0,155475819 | 3,043862153 | 0,002335621 | 0,034572565 | 1,388230335 |
| AK4       | 552,0900016 | 357,2200869 | 548,7730751 | 708,0499848 | 903,2634519 | 656,2236387 | 740,0395438 | 0,639622352 | 0,21029312  | 3,041575271 | 0,002353437 | 0,03475638  | 1,557921296 |
| LAMC1     | 1425,472533 | 1318,663682 | 1132,723911 | 2000,395131 | 1859,501599 | 2012,478761 | 2640,999606 | 0,598559964 | 0,196983922 | 3,038623437 | 0,002376617 | 0,034917587 | 1,514204398 |
| TSR1      | 997,5501681 | 945,2063182 | 1192,023566 | 1451,194621 | 1606,300512 | 1326,75188  | 1117,786614 | 0,485477492 | 0,159995562 | 3,034318494 | 0,002410798 | 0,035279833 | 1,400049167 |
| IRAK1     | 308,6653122 | 114,1529754 | 381,929979  | 566,4399879 | 531,5427073 | 580,230438  | 764,2733248 | 1,065364865 | 0,351170456 | 3,033754252 | 0,002415311 | 0,034305759 | 2,092699067 |
| GPR110    | 264,4700516 | 374,9334797 | 320,6201666 | 496,8663807 | 495,6276595 | 490,8266725 | 225,457737  | 0,62597791  | 0,206629155 | 3,029475247 | 0,00244979  | 0,035632387 | 1,543256546 |
| ATP5G1    | 975,1017817 | 974,2366007 | 1216,14546  | 1528,772272 | 1458,15094  | 1451,023114 | 1268,543546 | 0,489116175 | 0,162156985 | 3,01631271  | 0,002558692 | 0,036940403 | 1,403584747 |
| RNF152    | 67,34515902 | 47,72775266 | 82,41646916 | 161,9279531 | 94,27700044 | 133,2116106 | 50,44954769 | 0,995158711 | 0,330044305 | 3,015227639 | 0,002567864 | 0,037031309 | 1,993299796 |
| TENM3     | 162,0492889 | 101,3599696 | 112,5688359 | 196,4069088 | 175,9837342 | 207,4167359 | 269,5734982 | 0,626974897 | 0,207997689 | 3,014335876 | 0,002575425 | 0,037057346 | 1,544323395 |
| RAB19     | 0           | 0           | 0           | 2,462782556 | 6,285133363 | 0           | 6,374702397 | 4,484588638 | 1,488262525 | 3,013304819 | 0,002584192 | 0,037141993 | 22,38698964 |
| PHB       | 1765,705888 | 797,1026733 | 2023,22381  | 2994,127892 | 2793,292842 | 2993,238069 | 1953,651641 | 0,937990286 | 0,311419496 | 3,011983186 | 0,00259547  | 0,037221001 | 1,915857537 |
| E1F2C3    | 518,4174221 | 351,3156227 | 529,6765762 | 577,3056359 | 791,0289275 | 677,6805424 | 438,6246356 | 0,672401354 | 0,223429981 | 3,009449988 | 0,002617212 | 0,037449391 | 1,5937235   |
| TIMP1     | 4720,47474  | 3051,623938 | 4267,564976 | 575,225094  | 602,157762  | 5293,596955 | 487,184827  | 0,505779605 | 0,168055386 | 3,009600689 | 0,002615914 | 0,037449391 | 1,41989043  |
| PDIA3     | 6250,472572 | 3206,616125 | 5526,928828 | 7978,18409  | 8261,358867 | 7800,478539 | 5974,844968 | 0,682288918 | 0,227243153 | 3,002461947 | 0,002678055 | 0,038019261 | 1,604683659 |
| P2RY6     | 7,716632805 | 4,428348185 | 6,030473353 | 13,54530406 | 18,85540009 | 16,09267779 | 16,49653661 | 1,432338654 | 0,478053752 | 2,996187455 | 0,002733783 | 0,038527857 | 2,698838511 |
| PLAT      | 1531,400856 | 1093,309963 | 1412,135844 | 2088,439607 | 2178,247648 | 1930,227297 | 909,5702122 | 0,618974496 | 0,20653217  | 2,996988299 | 0,002726612 | 0,038527857 | 1,535783119 |
| LY75      | 99,61471439 | 82,17046077 | 87,44186362 | 154,5396054 | 137,3750578 | 143,0460248 | 60,42060686 | 0,695289243 | 0,232222294 | 2,99406758  | 0,00275285  | 0,038636992 | 1,619209032 |
| RNF144B   | 11,22419317 | 15,74523799 | 11,05586781 | 39,40452089 | 26,03840965 | 22,35094137 | 40,72250246 | 1,196944967 | 0,400152446 | 2,991222422 | 0,00277863  | 0,038684541 | 2,292536919 |
| TRHDE     | 59,62852622 | 50,1879461  | 65,33012799 | 111,4409107 | 107,7451434 | 92,08587845 | 68,07796658 | 0,840528207 | 0,280978676 | 2,991430595 | 0,002776736 | 0,038684541 | 1,790705644 |
| FKBP1A    | 10265,22617 | 5605,796764 | 10079,93621 | 13162,95707 | 15170,51619 | 13921,06032 | 9283,887763 | 0,70347283  | 0,236616754 | 2,973047422 | 0,002948589 | 0,040394696 | 1,628419983 |
| NHP2      | 735,1846527 | 698,6949359 | 1094,530914 | 1255,403408 | 1450,967931 | 1145,262236 | 820,6051817 | 0,609524108 | 0,20511838  | 2,971572352 | 0,002962791 | 0,040461099 | 1,525755836 |
| PRKCZ     | 197,1248926 | 166,801115  | 218,1021196 | 292,4554285 | 272,056487  | 277,151673  | 149,9419847 | 0,539901487 | 0,181901122 | 2,968104211 | 0,002996427 | 0,040737818 | 1,453873238 |
| SIRPA     | 291,8290224 | 278,0018583 | 258,3052753 | 485,1681635 | 423,7975639 | 518,5418398 | 637,5620568 | 0,784971148 | 0,264759734 | 2,964843399 | 0,00302837  | 0,041008785 | 1,723057861 |
| EFR3A     | 469,311577  | 654,411454  | 390,9756891 | 794,2473743 | 705,730689  | 835,0311697 | 1142,209368 | 0,62062962  | 0,209575968 | 2,961358716 | 0,00306285  | 0,041432122 | 1,537546049 |
| GXYLT1    | 150,8250957 | 56,58444903 | 105,5332837 | 222,8818213 | 234,3456868 | 197,5823217 | 140,0016095 | 1,070220055 | 0,362085125 | 2,955713949 | 0,003119463 | 0,04202138  | 2,099753619 |
| BAG1      | 117,8540283 | 105,7883178 | 116,5891515 | 193,9441263 | 148,1495721 | 167,1850415 | 207,5723221 | 0,589399387 | 0,199605519 | 2,952821094 | 0,003148844 | 0,042252606 | 1,504620224 |
| VAT1L     | 39,2846761  | 11,31688981 | 36,18284012 | 81,27182434 | 67,3407146  | 78,67531363 | 26,17268822 | 1,410288261 | 0,477630328 | 2,952677371 | 0,00315031  | 0,042252606 | 2,657902644 |
| VKORC1    | 1610,67172  | 1533,684588 | 1904,624501 | 2239,285039 | 2056,136486 | 2239,564325 | 1919,883741 | 0,373782059 | 0,12677842  | 2,948309808 | 0,003195167 | 0,042772721 | 1,295745208 |
| TMEM159   | 408,2800266 | 278,859357  | 430,1737659 | 642,7862471 | 590,8025361 | 522,1179905 | 305,5808353 | 0,656079165 | 0,222712536 | 2,94585647  | 0,003220618 | 0,043023983 | 1,575794238 |
| ENTPD7    | 388,6376885 | 309,984373  | 387,9604524 | 636,6292907 | 482,1595165 | 736,6870276 | 703,8822928 | 0,773511043 | 0,262804748 | 2,943291739 | 0,003247422 | 0,043193781 | 1,709424901 |
| FAM35A    | 20,34385012 | 9,348735057 | 13,0660256  | 38,78882526 | 29,62991442 | 42,91380743 | 36,00600584 | 1,39280004  | 0,473454505 | 2,941782207 | 0,003263293 | 0,043193781 | 2,625878274 |
| GLRX      | 222,3793272 | 113,6609368 | 188,9548317 | 385,42547   | 280,1373727 | 294,1383885 | 505,6472185 | 0,875880306 | 0,29752331  | 2,943904822 | 0,003240997 | 0,043193781 | 1,835127505 |
| C14orf105 | 13,32872939 | 19,1895088  | 13,0660256  | 38,17312962 | 21,54902867 | 31,29131792 | 360,3289618 | 0,980348553 | 0,233673974 | 2,938043212 | 0,00330291  | 0,043580812 | 1,972942011 |
| ELOVL6    | 77,86784012 | 64,45706803 | 83,42154805 | 129,2960842 | 123,9069149 | 130,5294976 | 313,099166  | 0,773485056 | 0,263555692 | 2,934806875 | 0,003337553 | 0,043902976 | 1,70939411  |
| WDR62     | 113,6449559 | 136,2947164 | 102,518047  | 171,1633876 | 191,2476295 | 166,2910038 | 169,4627171 | 0,573864574 | 0,195716622 | 2,932119764 | 0,003366569 | 0,044194368 | 1,488505522 |

|          |             |             |             |             |             |             |             |             |             |             |             |             |             |
|----------|-------------|-------------|-------------|-------------|-------------|-------------|-------------|-------------|-------------|-------------|-------------|-------------|-------------|
| C10orf55 | 11,92570524 | 11,31688981 | 9,04571003  | 24,62782556 | 27,83416204 | 16,98671544 | 32,09158759 | 1,089554682 | 0,372103898 | 2,92809263  | 0,003410484 | 0,044589052 | 2,128083386 |
| ILVBL    | 124,869149  | 102,3440469 | 130,660256  | 176,7046484 | 165,2092198 | 182,3836816 | 173,0968942 | 0,560123939 | 0,191404661 | 2,926386096 | 0,003429251 | 0,044698268 | 1,474395874 |
| FIGN     | 77,16632805 | 53,14017822 | 71,36060135 | 100,3583892 | 146,3538197 | 94,76799142 | 347,804712  | 0,765843643 | 0,261847802 | 2,924766359 | 0,003447149 | 0,044886136 | 1,700364027 |
| PPP2R5A  | 131,1827577 | 174,1816953 | 84,42662694 | 241,9683861 | 198,430639  | 260,1649576 | 187,3866579 | 0,835423121 | 0,286142888 | 2,919601207 | 0,003504796 | 0,045498749 | 1,784380294 |
| MTX3     | 213,2596702 | 272,5894327 | 189,9599106 | 397,1236871 | 370,8228684 | 362,9792879 | 216,0609737 | 0,739071039 | 0,253207158 | 2,918839441 | 0,003513371 | 0,045564145 | 1,669100747 |
| AMOTL1   | 484,7448426 | 346,3952358 | 477,4124738 | 733,9092017 | 672,5092698 | 684,8328436 | 589,8131194 | 0,678683464 | 0,232855984 | 2,91460607  | 0,003561378 | 0,045915523 | 1,600678384 |
| QPCT     | 57,52399    | 64,45706803 | 73,37075913 | 112,6723019 | 105,949391  | 108,1785562 | 67,38246332 | 0,748946659 | 0,257316938 | 2,910599919 | 0,003607356 | 0,046362805 | 1,680565368 |
| TJP1     | 193,6173322 | 172,2135405 | 155,7872283 | 251,8195163 | 289,1161347 | 217,2511501 | 497,6972888 | 0,536383825 | 0,18440742  | 2,908688961 | 0,003629478 | 0,046600611 | 1,450332639 |
| APP      | 2261,674924 | 1522,367698 | 2040,310151 | 2830,968548 | 2845,369661 | 2435,358572 | 3548,064487 | 0,478793602 | 0,164743354 | 2,906299948 | 0,003657307 | 0,046911152 | 1,393577853 |
| SOD2     | 3639,444636 | 5180,675338 | 3266,5064   | 6353,978994 | 7334,750634 | 5584,159192 | 5462,360106 | 0,672792128 | 0,231660009 | 2,904222147 | 0,003681668 | 0,047082944 | 1,594155241 |
| EEF1A2   | 3,507560366 | 3,444270811 | 1,005078892 | 11,0825215  | 6,285133363 | 7,152301239 | 240,9059023 | 1,546891047 | 0,532840155 | 2,903105243 | 0,003694824 | 0,047204315 | 2,921868088 |
| RAD51AP1 | 166,9598734 | 131,8663682 | 224,132593  | 263,5177335 | 288,2182585 | 322,7475934 | 225,8946718 | 0,748592823 | 0,258395594 | 2,897080448 | 0,003766532 | 0,048025142 | 1,680153242 |
| ERO1LB   | 16,83628976 | 19,68154749 | 25,1269723  | 37,55743398 | 29,62991442 | 45,5959204  | 61,02431949 | 0,892837553 | 0,308467426 | 2,894430587 | 0,003798469 | 0,048384452 | 1,856824615 |
| E2F7     | 387,9361765 | 501,3874223 | 429,168687  | 610,7700739 | 563,8662503 | 624,9323208 | 577,9908302 | 0,446654609 | 0,154347067 | 2,893832832 | 0,003805707 | 0,048428752 | 1,362876287 |
| SNHG16   | 1756,586231 | 876,8129407 | 1675,466513 | 2606,855335 | 2257,260753 | 2373,669974 | 1901,795236 | 0,749247568 | 0,259178747 | 2,890852649 | 0,003841982 | 0,048721302 | 1,680915927 |
| CCDC85C  | 211,155134  | 42,3153271  | 223,1275141 | 436,528208  | 342,9887064 | 376,3898527 | 262,1102077 | 1,284369022 | 0,444997488 | 2,886238814 | 0,003898762 | 0,049254098 | 2,435754991 |
| HUWE1    | 2262,376436 | 1663,582802 | 2131,77233  | 2874,067243 | 2781,620451 | 2853,768194 | 1873,397193 | 0,490933609 | 0,170300831 | 2,882743467 | 0,003942284 | 0,049578835 | 1,405354026 |
| PFAS     | 595,5837501 | 430,0418126 | 674,4079367 | 1031,290195 | 822,4545943 | 879,7330524 | 691,7921568 | 0,687886414 | 0,238606088 | 2,882937389 | 0,003939857 | 0,049578835 | 1,610921746 |
| TCFL5    | 241,3201532 | 274,5575875 | 194,9853051 | 387,8882526 | 313,3587919 | 403,2109824 | 178,8466751 | 0,631304368 | 0,219067418 | 2,881781203 | 0,003954342 | 0,049633546 | 1,54896481  |
| GRK6     | 244,1262015 | 229,2900283 | 270,366222  | 372,4958616 | 369,027116  | 336,1581582 | 268,3745629 | 0,538788248 | 0,18712751  | 2,87925729  | 0,00398613  | 0,049823685 | 1,452751806 |
| SACM1L   | 262,3655154 | 134,3265616 | 234,1833819 | 385,42547   | 333,1120682 | 387,1183046 | 364,07769   | 0,814157172 | 0,282787397 | 2,879043337 | 0,003988835 | 0,049823685 | 1,758270664 |
