# Supplementary material for: Analysis of the Role of FRMD5 in the Biology of Papillary Thyroid Carcinoma
Source: MDPI journal article supplement (doi:10.3390/ijms22136726), 2021-06-23
Supplement: s1 [file s1]

**Supplementary Table S7. Gene ontology (GO) enrichment analysis of the upregulated genes in BCPAP siFRMD5 (in comparison with BCPAP siNEG).**

| GOID       | GO Term                                                 | Ontology Source                                                 | Term PValue | Term PValue<br>Corrected with<br>Benjamini-<br>Hochberg | Group<br>PValue | Group<br>PValue<br>Corrected<br>with<br>Benjamini-<br>Hochberg | GO Levels          | GO Groups | %<br>Associated<br>Genes | Nr.<br>Genes |
|------------|---------------------------------------------------------|-----------------------------------------------------------------|-------------|---------------------------------------------------------|-----------------|----------------------------------------------------------------|--------------------|-----------|--------------------------|--------------|
| GO:0032879 | regulation of localization                              | GO_BiologicalProcess-EBI-UniProt-GOA-ACAP-ARAP_08.05.2020_00h00 | 1,28192E-10 | 1,5335E-08                                              | 4,00741E-12     | 3,5666E-10                                                     | [2, 3]             | Group185  | 4,45                     | 133,00       |
| GO:0040012 | regulation of locomotion                                | GO_BiologicalProcess-EBI-UniProt-GOA-ACAP-ARAP_08.05.2020_00h00 | 1,89996E-12 | 1,81826E-09                                             | 4,00741E-12     | 3,5666E-10                                                     | [2, 3]             | Group185  | 6,58                     | 68,00        |
| GO:0048870 | cell motility                                           | GO_BiologicalProcess-EBI-UniProt-GOA-ACAP-ARAP_08.05.2020_00h00 | 1,18486E-09 | 6,29948E-08                                             | 4,00741E-12     | 3,5666E-10                                                     | [2, 3]             | Group185  | 5,00                     | 90,00        |
| GO:0031589 | cell-substrate adhesion                                 | GO_BiologicalProcess-EBI-UniProt-GOA-ACAP-ARAP_08.05.2020_00h00 | 3,26496E-10 | 3,47175E-08                                             | 4,00741E-12     | 3,5666E-10                                                     | [3]                | Group185  | 9,07                     | 34,00        |
| GO:0040017 | positive regulation of locomotion                       | GO_BiologicalProcess-EBI-UniProt-GOA-ACAP-ARAP_08.05.2020_00h00 | 2,08823E-09 | 9,51635E-08                                             | 4,00741E-12     | 3,5666E-10                                                     | [2, 3, 4]          | Group185  | 7,20                     | 43,00        |
| GO:0006935 | chemotaxis                                              | GO_BiologicalProcess-EBI-UniProt-GOA-ACAP-ARAP_08.05.2020_00h00 | 0,001700784 | 0,00538957                                              | 4,00741E-12     | 3,5666E-10                                                     | [3, 4]             | Group185  | 4,56                     | 32,00        |
| GO:0030155 | regulation of cell adhesion                             | GO_BiologicalProcess-EBI-UniProt-GOA-ACAP-ARAP_08.05.2020_00h00 | 1,32928E-08 | 3,34768E-07                                             | 4,00741E-12     | 3,5666E-10                                                     | [3, 4]             | Group185  | 6,36                     | 48,00        |
| GO:0051270 | regulation of cellular component movement               | GO_BiologicalProcess-EBI-UniProt-GOA-ACAP-ARAP_08.05.2020_00h00 | 4,42024E-11 | 2,11509E-08                                             | 4,00741E-12     | 3,5666E-10                                                     | [3, 4]             | Group185  | 6,18                     | 67,00        |
| GO:0001935 | endothelial cell proliferation                          | GO_BiologicalProcess-EBI-UniProt-GOA-ACAP-ARAP_08.05.2020_00h00 | 0,003633375 | 0,00934715                                              | 4,00741E-12     | 3,5666E-10                                                     | [4]                | Group185  | 6,79                     | 11,00        |
| GO:0051271 | negative regulation of cellular component movement      | GO_BiologicalProcess-EBI-UniProt-GOA-ACAP-ARAP_08.05.2020_00h00 | 0,001396025 | 0,004606881                                             | 4,00741E-12     | 3,5666E-10                                                     | [3, 4, 5]          | Group185  | 5,67                     | 19,00        |
| GO:0001667 | ameboidal-type cell migration                           | GO_BiologicalProcess-EBI-UniProt-GOA-ACAP-ARAP_08.05.2020_00h00 | 3,07176E-05 | 0,00023147                                              | 4,00741E-12     | 3,5666E-10                                                     | [4, 5]             | Group185  | 6,24                     | 27,00        |
| GO:0010631 | epithelial cell migration                               | GO_BiologicalProcess-EBI-UniProt-GOA-ACAP-ARAP_08.05.2020_00h00 | 0,00018162  | 0,00096028                                              | 4,00741E-12     | 3,5666E-10                                                     | [4, 5, 6]          | Group185  | 6,51                     | 20,00        |
| GO:0010632 | regulation of epithelial cell migration                 | GO_BiologicalProcess-EBI-UniProt-GOA-ACAP-ARAP_08.05.2020_00h00 | 0,000186103 | 0,000978573                                             | 4,00741E-12     | 3,5666E-10                                                     | [3, 4, 5, 6, 7]    | Group185  | 7,14                     | 17,00        |
| GO:0048661 | positive regulation of smooth muscle cell proliferation | GO_BiologicalProcess-EBI-UniProt-GOA-ACAP-ARAP_08.05.2020_00h00 | 0,00013222  | 0,000762259                                             | 4,00741E-12     | 3,5666E-10                                                     | [4, 5, 6]          | Group185  | 10,99                    | 10,00        |
| GO:0010634 | positive regulation of epithelial cell migration        | GO_BiologicalProcess-EBI-UniProt-GOA-ACAP-ARAP_08.05.2020_00h00 | 0,000839522 | 0,003066498                                             | 4,00741E-12     | 3,5666E-10                                                     | [3, 4, 5, 6, 7, 8] | Group185  | 7,69                     | 12,00        |
| GO:0030335 | positive regulation of cell migration                   | GO_BiologicalProcess-EBI-UniProt-GOA-ACAP-ARAP_08.05.2020_00h00 | 8,27203E-10 | 5,65453E-08                                             | 4,00741E-12     | 3,5666E-10                                                     | [4, 5, 6, 7]       | Group185  | 7,54                     | 42,00        |
| GO:0001568 | blood vessel development                                | GO_BiologicalProcess-EBI-UniProt-GOA-ACAP-ARAP_08.05.2020_00h00 | 7,05492E-09 | 2,10986E-07                                             | 4,00741E-12     | 3,5666E-10                                                     | [3, 5, 6, 7, 8]    | Group185  | 6,49                     | 48,00        |
| GO:0010594 | regulation of endothelial cell migration                | GO_BiologicalProcess-EBI-UniProt-GOA-ACAP-ARAP_08.05.2020_00h00 | 0,000681572 | 0,002640746                                             | 4,00741E-12     | 3,5666E-10                                                     | [4, 5, 6, 7, 8]    | Group185  | 7,47                     | 13,00        |
| GO:0043542 | endothelial cell migration                              | GO_BiologicalProcess-EBI-UniProt-GOA-ACAP-ARAP_08.05.2020_00h00 | 0,000331147 | 0,001553468                                             | 4,00741E-12     | 3,5666E-10                                                     | [5, 6, 7]          | Group185  | 7,05                     | 16,00        |
| GO:1901342 | regulation of vasculature development                   | GO_BiologicalProcess-EBI-UniProt-GOA-ACAP-ARAP_08.05.2020_00h00 | 1,26962E-05 | 0,00011147                                              | 4,00741E-12     | 3,5666E-10                                                     | [4, 5, 6, 7, 8]    | Group185  | 6,85                     | 25,00        |

|            |                                                                     |                                                                 |             |             |             |            |                            |          |       |        |
|------------|---------------------------------------------------------------------|-----------------------------------------------------------------|-------------|-------------|-------------|------------|----------------------------|----------|-------|--------|
| GO:1904018 | positive regulation of vasculature development                      | GO_BiologicalProcess-EBI-UniProt-GOA-ACAP-ARAP_08.05.2020_00h00 | 0,000129235 | 0,000758763 | 4,00741E-12 | 3,5666E-10 | [3, 4, 5, 6, 7, 8, 9]      | Group185 | 7,66  | 16,00  |
| GO:0010595 | positive regulation of endothelial cell migration                   | GO_BiologicalProcess-EBI-UniProt-GOA-ACAP-ARAP_08.05.2020_00h00 | 0,00920515  | 0,019361163 | 4,00741E-12 | 3,5666E-10 | [4, 5, 6, 7, 8, 9]         | Group185 | 7,14  | 8,00   |
| GO:0048514 | blood vessel morphogenesis                                          | GO_BiologicalProcess-EBI-UniProt-GOA-ACAP-ARAP_08.05.2020_00h00 | 9,25827E-09 | 2,60593E-07 | 4,00741E-12 | 3,5666E-10 | [4, 5, 6, 7, 8, 9]         | Group185 | 6,76  | 44,00  |
| GO:0043534 | blood vessel endothelial cell migration                             | GO_BiologicalProcess-EBI-UniProt-GOA-ACAP-ARAP_08.05.2020_00h00 | 0,00532592  | 0,012492415 | 4,00741E-12 | 3,5666E-10 | [6, 7, 8]                  | Group185 | 7,26  | 9,00   |
| GO:0043535 | regulation of blood vessel endothelial cell migration               | GO_BiologicalProcess-EBI-UniProt-GOA-ACAP-ARAP_08.05.2020_00h00 | 0,004171744 | 0,010316174 | 4,00741E-12 | 3,5666E-10 | [5, 6, 7, 8, 9]            | Group185 | 8,16  | 8,00   |
| GO:0043536 | positive regulation of blood vessel endothelial cell migration      | GO_BiologicalProcess-EBI-UniProt-GOA-ACAP-ARAP_08.05.2020_00h00 | 0,02016817  | 0,034589496 | 4,00741E-12 | 3,5666E-10 | [5, 6, 7, 8, 9, 10]        | Group185 | 8,33  | 5,00   |
| GO:0045765 | regulation of angiogenesis                                          | GO_BiologicalProcess-EBI-UniProt-GOA-ACAP-ARAP_08.05.2020_00h00 | 5,97633E-05 | 0,000405628 | 4,00741E-12 | 3,5666E-10 | [4, 5, 6, 7, 8, 9, 10, 11] | Group185 | 6,69  | 22,00  |
| GO:1902895 | positive regulation of pri-miRNA transcription by RNA polymerase II | GO_BiologicalProcess-EBI-UniProt-GOA-ACAP-ARAP_08.05.2020_00h00 | 0,000732948 | 0,002794546 | 2,63149E-12 | 4,6841E-10 | [7, 8, 9, 10, 11, 12, 13]  | Group192 | 14,29 | 6,00   |
| GO:0009653 | anatomical structure morphogenesis                                  | GO_BiologicalProcess-EBI-UniProt-GOA-ACAP-ARAP_08.05.2020_00h00 | 9,29458E-11 | 1,48249E-08 | 2,63149E-12 | 4,6841E-10 | [2, 3]                     | Group192 | 4,51  | 130,00 |
| GO:0023051 | regulation of signaling                                             | GO_BiologicalProcess-EBI-UniProt-GOA-ACAP-ARAP_08.05.2020_00h00 | 4,33256E-10 | 3,76933E-08 | 2,63149E-12 | 4,6841E-10 | [2, 3]                     | Group192 | 4,12  | 158,00 |
| GO:0032879 | regulation of localization                                          | GO_BiologicalProcess-EBI-UniProt-GOA-ACAP-ARAP_08.05.2020_00h00 | 1,28192E-10 | 1,5335E-08  | 2,63149E-12 | 4,6841E-10 | [2, 3]                     | Group192 | 4,45  | 133,00 |
| GO:0040012 | regulation of locomotion                                            | GO_BiologicalProcess-EBI-UniProt-GOA-ACAP-ARAP_08.05.2020_00h00 | 1,89996E-12 | 1,81826E-09 | 2,63149E-12 | 4,6841E-10 | [2, 3]                     | Group192 | 6,58  | 68,00  |
| GO:0048583 | regulation of response to stimulus                                  | GO_BiologicalProcess-EBI-UniProt-GOA-ACAP-ARAP_08.05.2020_00h00 | 6,27191E-11 | 2,00074E-08 | 2,63149E-12 | 4,6841E-10 | [2, 3]                     | Group192 | 4,02  | 182,00 |
| GO:0048870 | cell motility                                                       | GO_BiologicalProcess-EBI-UniProt-GOA-ACAP-ARAP_08.05.2020_00h00 | 1,18486E-09 | 6,29948E-08 | 2,63149E-12 | 4,6841E-10 | [2, 3]                     | Group192 | 5,00  | 90,00  |
| GO:0050793 | regulation of developmental process                                 | GO_BiologicalProcess-EBI-UniProt-GOA-ACAP-ARAP_08.05.2020_00h00 | 1,13592E-09 | 6,39455E-08 | 2,63149E-12 | 4,6841E-10 | [2, 3]                     | Group192 | 4,42  | 124,00 |
| GO:0051239 | regulation of multicellular organismal process                      | GO_BiologicalProcess-EBI-UniProt-GOA-ACAP-ARAP_08.05.2020_00h00 | 8,97701E-09 | 2,60333E-07 | 2,63149E-12 | 4,6841E-10 | [2, 3]                     | Group192 | 4,10  | 140,00 |
| GO:0009888 | tissue development                                                  | GO_BiologicalProcess-EBI-UniProt-GOA-ACAP-ARAP_08.05.2020_00h00 | 5,58784E-08 | 1,00898E-06 | 2,63149E-12 | 4,6841E-10 | [3]                        | Group192 | 4,48  | 98,00  |
| GO:0023056 | positive regulation of signaling                                    | GO_BiologicalProcess-EBI-UniProt-GOA-ACAP-ARAP_08.05.2020_00h00 | 6,42911E-11 | 1,53817E-08 | 2,63149E-12 | 4,6841E-10 | [2, 3, 4]                  | Group192 | 5,00  | 102,00 |
| GO:0040017 | positive regulation of locomotion                                   | GO_BiologicalProcess-EBI-UniProt-GOA-ACAP-ARAP_08.05.2020_00h00 | 2,08823E-09 | 9,51635E-08 | 2,63149E-12 | 4,6841E-10 | [2, 3, 4]                  | Group192 | 7,20  | 43,00  |
| GO:0048584 | positive regulation of response to stimulus                         | GO_BiologicalProcess-EBI-UniProt-GOA-ACAP-ARAP_08.05.2020_00h00 | 2,07976E-07 | 3,15925E-06 | 2,63149E-12 | 4,6841E-10 | [2, 3, 4]                  | Group192 | 4,21  | 109,00 |
| GO:0048646 | anatomical structure formation involved in morphogenesis            | GO_BiologicalProcess-EBI-UniProt-GOA-ACAP-ARAP_08.05.2020_00h00 | 2,69379E-08 | 5,60425E-07 | 2,63149E-12 | 4,6841E-10 | [2, 3, 4]                  | Group192 | 5,40  | 64,00  |
| GO:0051093 | negative regulation of developmental process                        | GO_BiologicalProcess-EBI-UniProt-GOA-ACAP-ARAP_08.05.2020_00h00 | 0,002781123 | 0,007692298 | 2,63149E-12 | 4,6841E-10 | [2, 3, 4]                  | Group192 | 4,07  | 43,00  |
| GO:0051094 | positive regulation of developmental process                        | GO_BiologicalProcess-EBI-UniProt-GOA-ACAP-ARAP_08.05.2020_00h00 | 8,57256E-07 | 1,07947E-05 | 2,63149E-12 | 4,6841E-10 | [2, 3, 4]                  | Group192 | 4,74  | 70,00  |

|            |                                                         |                                                                 |             |             |             |            |           |          |      |        |
|------------|---------------------------------------------------------|-----------------------------------------------------------------|-------------|-------------|-------------|------------|-----------|----------|------|--------|
| GO:0051240 | positive regulation of multicellular organismal process | GO_BiologicalProcess-EBI-UniProt-GOA-ACAP-ARAP_08.05.2020_00h00 | 3,52846E-07 | 5,03991E-06 | 2,63149E-12 | 4,6841E-10 | [2, 3, 4] | Group192 | 4,50 | 86,00  |
| GO:0051241 | negative regulation of multicellular organismal process | GO_BiologicalProcess-EBI-UniProt-GOA-ACAP-ARAP_08.05.2020_00h00 | 0,001074145 | 0,003697685 | 2,63149E-12 | 4,6841E-10 | [2, 3, 4] | Group192 | 4,04 | 53,00  |
| GO:0000902 | cell morphogenesis                                      | GO_BiologicalProcess-EBI-UniProt-GOA-ACAP-ARAP_08.05.2020_00h00 | 0,000202677 | 0,001031712 | 2,63149E-12 | 4,6841E-10 | [3, 4]    | Group192 | 4,42 | 50,00  |
| GO:0006935 | chemotaxis                                              | GO_BiologicalProcess-EBI-UniProt-GOA-ACAP-ARAP_08.05.2020_00h00 | 0,001700784 | 0,00538957  | 2,63149E-12 | 4,6841E-10 | [3, 4]    | Group192 | 4,56 | 32,00  |
| GO:0009790 | embryo development                                      | GO_BiologicalProcess-EBI-UniProt-GOA-ACAP-ARAP_08.05.2020_00h00 | 0,000211308 | 0,001058752 | 2,63149E-12 | 4,6841E-10 | [3, 4]    | Group192 | 4,41 | 50,00  |
| GO:0010646 | regulation of cell communication                        | GO_BiologicalProcess-EBI-UniProt-GOA-ACAP-ARAP_08.05.2020_00h00 | 3,57848E-10 | 3,4246E-08  | 2,63149E-12 | 4,6841E-10 | [3, 4]    | Group192 | 4,14 | 157,00 |
| GO:0010941 | regulation of cell death                                | GO_BiologicalProcess-EBI-UniProt-GOA-ACAP-ARAP_08.05.2020_00h00 | 3,69996E-07 | 5,20716E-06 | 2,63149E-12 | 4,6841E-10 | [3, 4]    | Group192 | 4,57 | 82,00  |
| GO:0022603 | regulation of anatomical structure morphogenesis        | GO_BiologicalProcess-EBI-UniProt-GOA-ACAP-ARAP_08.05.2020_00h00 | 5,07994E-07 | 6,84718E-06 | 2,63149E-12 | 4,6841E-10 | [3, 4]    | Group192 | 5,11 | 60,00  |
| GO:0035295 | tube development                                        | GO_BiologicalProcess-EBI-UniProt-GOA-ACAP-ARAP_08.05.2020_00h00 | 2,65621E-08 | 5,64888E-07 | 2,63149E-12 | 4,6841E-10 | [3, 4]    | Group192 | 5,48 | 62,00  |
| GO:0045595 | regulation of cell differentiation                      | GO_BiologicalProcess-EBI-UniProt-GOA-ACAP-ARAP_08.05.2020_00h00 | 5,09874E-05 | 0,000353586 | 2,63149E-12 | 4,6841E-10 | [3, 4]    | Group192 | 4,04 | 80,00  |
| GO:0048468 | cell development                                        | GO_BiologicalProcess-EBI-UniProt-GOA-ACAP-ARAP_08.05.2020_00h00 | 1,28955E-05 | 0,00011219  | 2,63149E-12 | 4,6841E-10 | [3, 4]    | Group192 | 4,03 | 93,00  |
| GO:0048729 | tissue morphogenesis                                    | GO_BiologicalProcess-EBI-UniProt-GOA-ACAP-ARAP_08.05.2020_00h00 | 7,67653E-05 | 0,000486519 | 2,63149E-12 | 4,6841E-10 | [3, 4]    | Group192 | 5,14 | 37,00  |
| GO:0051270 | regulation of cellular component movement               | GO_BiologicalProcess-EBI-UniProt-GOA-ACAP-ARAP_08.05.2020_00h00 | 4,42024E-11 | 2,11509E-08 | 2,63149E-12 | 4,6841E-10 | [3, 4]    | Group192 | 6,18 | 67,00  |
| GO:2000026 | regulation of multicellular organismal development      | GO_BiologicalProcess-EBI-UniProt-GOA-ACAP-ARAP_08.05.2020_00h00 | 3,43602E-09 | 1,42968E-07 | 2,63149E-12 | 4,6841E-10 | [3, 4]    | Group192 | 4,64 | 103,00 |
| GO:0001935 | endothelial cell proliferation                          | GO_BiologicalProcess-EBI-UniProt-GOA-ACAP-ARAP_08.05.2020_00h00 | 0,003633375 | 0,00934715  | 2,63149E-12 | 4,6841E-10 | [4]       | Group192 | 6,79 | 11,00  |
| GO:0007166 | cell surface receptor signaling pathway                 | GO_BiologicalProcess-EBI-UniProt-GOA-ACAP-ARAP_08.05.2020_00h00 | 2,092E-08   | 4,76678E-07 | 2,63149E-12 | 4,6841E-10 | [3, 4, 5] | Group192 | 4,08 | 137,00 |
| GO:0010647 | positive regulation of cell communication               | GO_BiologicalProcess-EBI-UniProt-GOA-ACAP-ARAP_08.05.2020_00h00 | 1,14659E-10 | 1,56756E-08 | 2,63149E-12 | 4,6841E-10 | [3, 4, 5] | Group192 | 4,98 | 101,00 |
| GO:0035239 | tube morphogenesis                                      | GO_BiologicalProcess-EBI-UniProt-GOA-ACAP-ARAP_08.05.2020_00h00 | 6,64249E-09 | 2,11896E-07 | 2,63149E-12 | 4,6841E-10 | [3, 4, 5] | Group192 | 6,04 | 55,00  |
| GO:0045597 | positive regulation of cell differentiation             | GO_BiologicalProcess-EBI-UniProt-GOA-ACAP-ARAP_08.05.2020_00h00 | 0,00015702  | 0,000878762 | 2,63149E-12 | 4,6841E-10 | [3, 4, 5] | Group192 | 4,52 | 48,00  |
| GO:0048588 | developmental cell growth                               | GO_BiologicalProcess-EBI-UniProt-GOA-ACAP-ARAP_08.05.2020_00h00 | 0,01525921  | 0,027815361 | 2,63149E-12 | 4,6841E-10 | [3, 4, 5] | Group192 | 5,18 | 13,00  |
| GO:0048598 | embryonic morphogenesis                                 | GO_BiologicalProcess-EBI-UniProt-GOA-ACAP-ARAP_08.05.2020_00h00 | 0,000934627 | 0,003362548 | 2,63149E-12 | 4,6841E-10 | [3, 4, 5] | Group192 | 4,79 | 31,00  |
| GO:0051130 | positive regulation of cellular component organization  | GO_BiologicalProcess-EBI-UniProt-GOA-ACAP-ARAP_08.05.2020_00h00 | 7,13305E-08 | 1,24115E-06 | 2,63149E-12 | 4,6841E-10 | [3, 4, 5] | Group192 | 5,15 | 67,00  |
| GO:0060429 | epithelium development                                  | GO_BiologicalProcess-EBI-UniProt-GOA-ACAP-ARAP_08.05.2020_00h00 | 5,08926E-06 | 5,18131E-05 | 2,63149E-12 | 4,6841E-10 | [4]       | Group192 | 4,64 | 64,00  |

|            |                                                                    |                                                                 |             |             |             |            |                    |          |       |       |
|------------|--------------------------------------------------------------------|-----------------------------------------------------------------|-------------|-------------|-------------|------------|--------------------|----------|-------|-------|
| GO:0060548 | negative regulation of cell death                                  | GO_BiologicalProcess-EBI-UniProt-GOA-ACAP-ARAP_08.05.2020_00h00 | 6,67908E-06 | 6,3286E-05  | 2,63149E-12 | 4,6841E-10 | [3, 4, 5]          | Group192 | 4,93  | 53,00 |
| GO:0000904 | cell morphogenesis involved in differentiation                     | GO_BiologicalProcess-EBI-UniProt-GOA-ACAP-ARAP_08.05.2020_00h00 | 0,000202059 | 0,001034068 | 2,63149E-12 | 4,6841E-10 | [4, 5]             | Group192 | 4,80  | 39,00 |
| GO:0001667 | ameboidal-type cell migration                                      | GO_BiologicalProcess-EBI-UniProt-GOA-ACAP-ARAP_08.05.2020_00h00 | 3,07176E-05 | 0,00023147  | 2,63149E-12 | 4,6841E-10 | [4, 5]             | Group192 | 6,24  | 27,00 |
| GO:0002009 | morphogenesis of an epithelium                                     | GO_BiologicalProcess-EBI-UniProt-GOA-ACAP-ARAP_08.05.2020_00h00 | 0,000210357 | 0,001059536 | 2,63149E-12 | 4,6841E-10 | [4, 5]             | Group192 | 5,24  | 31,00 |
| GO:0009887 | animal organ morphogenesis                                         | GO_BiologicalProcess-EBI-UniProt-GOA-ACAP-ARAP_08.05.2020_00h00 | 0,000679847 | 0,002644772 | 2,63149E-12 | 4,6841E-10 | [3, 4, 5, 6]       | Group192 | 4,21  | 49,00 |
| GO:0022604 | regulation of cell morphogenesis                                   | GO_BiologicalProcess-EBI-UniProt-GOA-ACAP-ARAP_08.05.2020_00h00 | 0,025190763 | 0,040860273 | 2,63149E-12 | 4,6841E-10 | [4, 5]             | Group192 | 4,11  | 22,00 |
| GO:0031344 | regulation of cell projection organization                         | GO_BiologicalProcess-EBI-UniProt-GOA-ACAP-ARAP_08.05.2020_00h00 | 0,004833171 | 0,011592343 | 2,63149E-12 | 4,6841E-10 | [4, 5]             | Group192 | 4,26  | 32,00 |
| GO:0048534 | hematopoietic or lymphoid organ development                        | GO_BiologicalProcess-EBI-UniProt-GOA-ACAP-ARAP_08.05.2020_00h00 | 2,0816E-05  | 0,000167403 | 2,63149E-12 | 4,6841E-10 | [3, 4, 5, 6]       | Group192 | 4,88  | 49,00 |
| GO:0072359 | circulatory system development                                     | GO_BiologicalProcess-EBI-UniProt-GOA-ACAP-ARAP_08.05.2020_00h00 | 3,81703E-07 | 5,29405E-06 | 2,63149E-12 | 4,6841E-10 | [4, 5]             | Group192 | 5,15  | 60,00 |
| GO:0010631 | epithelial cell migration                                          | GO_BiologicalProcess-EBI-UniProt-GOA-ACAP-ARAP_08.05.2020_00h00 | 0,00018162  | 0,00096028  | 2,63149E-12 | 4,6841E-10 | [4, 5, 6]          | Group192 | 6,51  | 20,00 |
| GO:0010632 | regulation of epithelial cell migration                            | GO_BiologicalProcess-EBI-UniProt-GOA-ACAP-ARAP_08.05.2020_00h00 | 0,000186103 | 0,000978573 | 2,63149E-12 | 4,6841E-10 | [3, 4, 5, 6, 7]    | Group192 | 7,14  | 17,00 |
| GO:0031346 | positive regulation of cell projection organization                | GO_BiologicalProcess-EBI-UniProt-GOA-ACAP-ARAP_08.05.2020_00h00 | 0,009294322 | 0,019420668 | 2,63149E-12 | 4,6841E-10 | [4, 5, 6]          | Group192 | 4,67  | 20,00 |
| GO:0048661 | positive regulation of smooth muscle cell proliferation            | GO_BiologicalProcess-EBI-UniProt-GOA-ACAP-ARAP_08.05.2020_00h00 | 0,00013222  | 0,000762259 | 2,63149E-12 | 4,6841E-10 | [4, 5, 6]          | Group192 | 10,99 | 10,00 |
| GO:0051962 | positive regulation of nervous system development                  | GO_BiologicalProcess-EBI-UniProt-GOA-ACAP-ARAP_08.05.2020_00h00 | 0,024883866 | 0,040431    | 2,63149E-12 | 4,6841E-10 | [3, 4, 5, 6, 7]    | Group192 | 4,03  | 24,00 |
| GO:0060562 | epithelial tube morphogenesis                                      | GO_BiologicalProcess-EBI-UniProt-GOA-ACAP-ARAP_08.05.2020_00h00 | 0,025199339 | 0,040805023 | 2,63149E-12 | 4,6841E-10 | [4, 5, 6]          | Group192 | 4,51  | 16,00 |
| GO:0001944 | vasculature development                                            | GO_BiologicalProcess-EBI-UniProt-GOA-ACAP-ARAP_08.05.2020_00h00 | 3,67366E-09 | 1,46487E-07 | 2,63149E-12 | 4,6841E-10 | [4, 5, 6, 7]       | Group192 | 6,47  | 50,00 |
| GO:0010634 | positive regulation of epithelial cell migration                   | GO_BiologicalProcess-EBI-UniProt-GOA-ACAP-ARAP_08.05.2020_00h00 | 0,000839522 | 0,003066498 | 2,63149E-12 | 4,6841E-10 | [3, 4, 5, 6, 7, 8] | Group192 | 7,69  | 12,00 |
| GO:0010769 | regulation of cell morphogenesis involved in differentiation       | GO_BiologicalProcess-EBI-UniProt-GOA-ACAP-ARAP_08.05.2020_00h00 | 0,014062108 | 0,026284058 | 2,63149E-12 | 4,6841E-10 | [5, 6]             | Group192 | 4,83  | 16,00 |
| GO:0030335 | positive regulation of cell migration                              | GO_BiologicalProcess-EBI-UniProt-GOA-ACAP-ARAP_08.05.2020_00h00 | 8,27203E-10 | 5,65453E-08 | 2,63149E-12 | 4,6841E-10 | [4, 5, 6, 7]       | Group192 | 7,54  | 42,00 |
| GO:0120035 | regulation of plasma membrane bounded cell projection organization | GO_BiologicalProcess-EBI-UniProt-GOA-ACAP-ARAP_08.05.2020_00h00 | 0,012516662 | 0,024396019 | 2,63149E-12 | 4,6841E-10 | [5, 6]             | Group192 | 4,04  | 30,00 |
| GO:0001568 | blood vessel development                                           | GO_BiologicalProcess-EBI-UniProt-GOA-ACAP-ARAP_08.05.2020_00h00 | 7,05492E-09 | 2,10986E-07 | 2,63149E-12 | 4,6841E-10 | [3, 5, 6, 7, 8]    | Group192 | 6,49  | 48,00 |
| GO:0010594 | regulation of endothelial cell migration                           | GO_BiologicalProcess-EBI-UniProt-GOA-ACAP-ARAP_08.05.2020_00h00 | 0,000681572 | 0,002640746 | 2,63149E-12 | 4,6841E-10 | [4, 5, 6, 7, 8]    | Group192 | 7,47  | 13,00 |
| GO:0043542 | endothelial cell migration                                         | GO_BiologicalProcess-EBI-UniProt-GOA-ACAP-ARAP_08.05.2020_00h00 | 0,000331147 | 0,001553468 | 2,63149E-12 | 4,6841E-10 | [5, 6, 7]          | Group192 | 7,05  | 16,00 |

|            |                                                                  |                                                                 |             |             |             |            |                                    |          |       |       |
|------------|------------------------------------------------------------------|-----------------------------------------------------------------|-------------|-------------|-------------|------------|------------------------------------|----------|-------|-------|
| GO:0045937 | positive regulation of phosphate metabolic process               | GO_BiologicalProcess-EBI-UniProt-GOA-ACAP-ARAP_08.05.2020_00h00 | 1,12601E-09 | 6,73495E-08 | 2,63149E-12 | 4,6841E-10 | [5, 6, 7]                          | Group192 | 5,60  | 70,00 |
| GO:0120039 | plasma membrane bounded cell projection morphogenesis            | GO_BiologicalProcess-EBI-UniProt-GOA-ACAP-ARAP_08.05.2020_00h00 | 0,009786652 | 0,020228567 | 2,63149E-12 | 4,6841E-10 | [5, 6, 7]                          | Group192 | 4,12  | 30,00 |
| GO:1901342 | regulation of vasculature development                            | GO_BiologicalProcess-EBI-UniProt-GOA-ACAP-ARAP_08.05.2020_00h00 | 1,26962E-05 | 0,00011147  | 2,63149E-12 | 4,6841E-10 | [4, 5, 6, 7, 8]                    | Group192 | 6,85  | 25,00 |
| GO:1901343 | negative regulation of vasculature development                   | GO_BiologicalProcess-EBI-UniProt-GOA-ACAP-ARAP_08.05.2020_00h00 | 0,028789286 | 0,045166142 | 2,63149E-12 | 4,6841E-10 | [3, 4, 5, 6, 7, 8, 9]              | Group192 | 5,80  | 8,00  |
| GO:1904018 | positive regulation of vasculature development                   | GO_BiologicalProcess-EBI-UniProt-GOA-ACAP-ARAP_08.05.2020_00h00 | 0,000129235 | 0,000758763 | 2,63149E-12 | 4,6841E-10 | [3, 4, 5, 6, 7, 8, 9]              | Group192 | 7,66  | 16,00 |
| GO:1904707 | positive regulation of vascular smooth muscle cell proliferation | GO_BiologicalProcess-EBI-UniProt-GOA-ACAP-ARAP_08.05.2020_00h00 | 0,015443421 | 0,028044315 | 2,63149E-12 | 4,6841E-10 | [5, 6, 7]                          | Group192 | 10,81 | 4,00  |
| GO:0001525 | angiogenesis                                                     | GO_BiologicalProcess-EBI-UniProt-GOA-ACAP-ARAP_08.05.2020_00h00 | 5,95789E-09 | 2,11174E-07 | 2,63149E-12 | 4,6841E-10 | [3, 4, 5, 6, 7, 8, 9, 10]          | Group192 | 7,27  | 40,00 |
| GO:0010595 | positive regulation of endothelial cell migration                | GO_BiologicalProcess-EBI-UniProt-GOA-ACAP-ARAP_08.05.2020_00h00 | 0,00920515  | 0,019361163 | 2,63149E-12 | 4,6841E-10 | [4, 5, 6, 7, 8, 9]                 | Group192 | 7,14  | 8,00  |
| GO:0048514 | blood vessel morphogenesis                                       | GO_BiologicalProcess-EBI-UniProt-GOA-ACAP-ARAP_08.05.2020_00h00 | 9,25827E-09 | 2,60593E-07 | 2,63149E-12 | 4,6841E-10 | [4, 5, 6, 7, 8, 9]                 | Group192 | 6,76  | 44,00 |
| GO:0042327 | positive regulation of phosphorylation                           | GO_BiologicalProcess-EBI-UniProt-GOA-ACAP-ARAP_08.05.2020_00h00 | 3,4551E-08  | 6,74801E-07 | 2,63149E-12 | 4,6841E-10 | [6, 7, 8]                          | Group192 | 5,40  | 63,00 |
| GO:0043534 | blood vessel endothelial cell migration                          | GO_BiologicalProcess-EBI-UniProt-GOA-ACAP-ARAP_08.05.2020_00h00 | 0,00532592  | 0,012492415 | 2,63149E-12 | 4,6841E-10 | [6, 7, 8]                          | Group192 | 7,26  | 9,00  |
| GO:0043535 | regulation of blood vessel endothelial cell migration            | GO_BiologicalProcess-EBI-UniProt-GOA-ACAP-ARAP_08.05.2020_00h00 | 0,004171744 | 0,010316174 | 2,63149E-12 | 4,6841E-10 | [5, 6, 7, 8, 9]                    | Group192 | 8,16  | 8,00  |
| GO:0048667 | cell morphogenesis involved in neuron differentiation            | GO_BiologicalProcess-EBI-UniProt-GOA-ACAP-ARAP_08.05.2020_00h00 | 0,006632533 | 0,014899846 | 2,63149E-12 | 4,6841E-10 | [5, 6, 8, 9, 10]                   | Group192 | 4,33  | 28,00 |
| GO:0002040 | sprouting angiogenesis                                           | GO_BiologicalProcess-EBI-UniProt-GOA-ACAP-ARAP_08.05.2020_00h00 | 0,00041584  | 0,001833911 | 2,63149E-12 | 4,6841E-10 | [4, 5, 6, 7, 8, 9, 10, 11]         | Group192 | 8,87  | 11,00 |
| GO:0043536 | positive regulation of blood vessel endothelial cell migration   | GO_BiologicalProcess-EBI-UniProt-GOA-ACAP-ARAP_08.05.2020_00h00 | 0,02016817  | 0,034589496 | 2,63149E-12 | 4,6841E-10 | [5, 6, 7, 8, 9, 10]                | Group192 | 8,33  | 5,00  |
| GO:0045765 | regulation of angiogenesis                                       | GO_BiologicalProcess-EBI-UniProt-GOA-ACAP-ARAP_08.05.2020_00h00 | 5,97633E-05 | 0,000405628 | 2,63149E-12 | 4,6841E-10 | [4, 5, 6, 7, 8, 9, 10, 11]         | Group192 | 6,69  | 22,00 |
| GO:0045766 | positive regulation of angiogenesis                              | GO_BiologicalProcess-EBI-UniProt-GOA-ACAP-ARAP_08.05.2020_00h00 | 0,00132399  | 0,004430275 | 2,63149E-12 | 4,6841E-10 | [4, 5, 6, 7, 8, 9, 10, 11, 12]     | Group192 | 6,95  | 13,00 |
| GO:0007411 | axon guidance                                                    | GO_BiologicalProcess-EBI-UniProt-GOA-ACAP-ARAP_08.05.2020_00h00 | 0,014432535 | 0,026663968 | 2,63149E-12 | 4,6841E-10 | [4, 5, 6, 7, 8, 9, 10, 11, 12, 13] | Group192 | 4,93  | 15,00 |
| GO:0010975 | regulation of neuron projection development                      | GO_BiologicalProcess-EBI-UniProt-GOA-ACAP-ARAP_08.05.2020_00h00 | 0,011319031 | 0,022567319 | 2,63149E-12 | 4,6841E-10 | [6, 7, 8, 9, 10, 11]               | Group192 | 4,33  | 24,00 |
| GO:1903670 | regulation of sprouting angiogenesis                             | GO_BiologicalProcess-EBI-UniProt-GOA-ACAP-ARAP_08.05.2020_00h00 | 0,003441989 | 0,008951043 | 2,63149E-12 | 4,6841E-10 | [5, 6, 7, 8, 9, 10, 11, 12]        | Group192 | 9,33  | 7,00  |
| GO:0061564 | axon development                                                 | GO_BiologicalProcess-EBI-UniProt-GOA-ACAP-ARAP_08.05.2020_00h00 | 0,00784214  | 0,01709551  | 2,63149E-12 | 4,6841E-10 | [6, 7, 9, 10, 11]                  | Group192 | 4,42  | 25,00 |
| GO:0050770 | regulation of axonogenesis                                       | GO_BiologicalProcess-EBI-UniProt-GOA-ACAP-ARAP_08.05.2020_00h00 | 0,00706902  | 0,015696175 | 2,63149E-12 | 4,6841E-10 | [6, 7, 8, 9, 10, 11, 12, 13]       | Group192 | 5,94  | 12,00 |
| GO:0012501 | programmed cell death                                            | GO_BiologicalProcess-EBI-UniProt-GOA-ACAP-ARAP_08.05.2020_00h00 | 9,88592E-07 | 1,19757E-05 | 1,45453E-11 | 6,4727E-10 | [3]                                | Group187 | 4,27  | 94,00 |

|            |                                                           |                                                                 |             |             |             |            |              |          |       |       |
|------------|-----------------------------------------------------------|-----------------------------------------------------------------|-------------|-------------|-------------|------------|--------------|----------|-------|-------|
| GO:0044092 | negative regulation of molecular function                 | GO_BiologicalProcess-EBI-UniProt-GOA-ACAP-ARAP_08.05.2020_00h00 | 0,001134739 | 0,003864575 | 1,45453E-11 | 6,4727E-10 | [3]          | Group187 | 4,07  | 51,00 |
| GO:0010941 | regulation of cell death                                  | GO_BiologicalProcess-EBI-UniProt-GOA-ACAP-ARAP_08.05.2020_00h00 | 3,69996E-07 | 5,20716E-06 | 1,45453E-11 | 6,4727E-10 | [3, 4]       | Group187 | 4,57  | 82,00 |
| GO:0010942 | positive regulation of cell death                         | GO_BiologicalProcess-EBI-UniProt-GOA-ACAP-ARAP_08.05.2020_00h00 | 5,54439E-06 | 5,52706E-05 | 1,45453E-11 | 6,4727E-10 | [3, 4, 5]    | Group187 | 5,53  | 41,00 |
| GO:0043086 | negative regulation of catalytic activity                 | GO_BiologicalProcess-EBI-UniProt-GOA-ACAP-ARAP_08.05.2020_00h00 | 0,003219853 | 0,008512152 | 1,45453E-11 | 6,4727E-10 | [4]          | Group187 | 4,20  | 37,00 |
| GO:0051336 | regulation of hydrolase activity                          | GO_BiologicalProcess-EBI-UniProt-GOA-ACAP-ARAP_08.05.2020_00h00 | 8,71715E-06 | 7,94506E-05 | 1,45453E-11 | 6,4727E-10 | [4]          | Group187 | 4,59  | 63,00 |
| GO:0097190 | apoptotic signaling pathway                               | GO_BiologicalProcess-EBI-UniProt-GOA-ACAP-ARAP_08.05.2020_00h00 | 1,38238E-06 | 1,63326E-05 | 1,45453E-11 | 6,4727E-10 | [3, 4, 5]    | Group187 | 6,00  | 39,00 |
| GO:0006508 | proteolysis                                               | GO_BiologicalProcess-EBI-UniProt-GOA-ACAP-ARAP_08.05.2020_00h00 | 5,7795E-05  | 0,00039507  | 1,45453E-11 | 6,4727E-10 | [4, 5]       | Group187 | 4,07  | 77,00 |
| GO:0030307 | positive regulation of cell growth                        | GO_BiologicalProcess-EBI-UniProt-GOA-ACAP-ARAP_08.05.2020_00h00 | 0,020310845 | 0,034771878 | 1,45453E-11 | 6,4727E-10 | [3, 4, 5, 6] | Group187 | 5,56  | 10,00 |
| GO:0051248 | negative regulation of protein metabolic process          | GO_BiologicalProcess-EBI-UniProt-GOA-ACAP-ARAP_08.05.2020_00h00 | 0,000265156 | 0,001301303 | 1,45453E-11 | 6,4727E-10 | [4, 5, 6]    | Group187 | 4,34  | 51,00 |
| GO:0051345 | positive regulation of hydrolase activity                 | GO_BiologicalProcess-EBI-UniProt-GOA-ACAP-ARAP_08.05.2020_00h00 | 9,69574E-06 | 8,7536E-05  | 1,45453E-11 | 6,4727E-10 | [5]          | Group187 | 5,30  | 43,00 |
| GO:0001836 | release of cytochrome c from mitochondria                 | GO_BiologicalProcess-EBI-UniProt-GOA-ACAP-ARAP_08.05.2020_00h00 | 0,001802429 | 0,005618646 | 1,45453E-11 | 6,4727E-10 | [4, 5, 6, 7] | Group187 | 10,45 | 7,00  |
| GO:0008233 | peptidase activity                                        | GO_BiologicalProcess-EBI-UniProt-GOA-ACAP-ARAP_08.05.2020_00h00 | 0,0002754   | 0,001331101 | 1,45453E-11 | 6,4727E-10 | [5, 6]       | Group187 | 4,39  | 49,00 |
| GO:0030162 | regulation of proteolysis                                 | GO_BiologicalProcess-EBI-UniProt-GOA-ACAP-ARAP_08.05.2020_00h00 | 0,004999209 | 0,011901102 | 1,45453E-11 | 6,4727E-10 | [5, 6]       | Group187 | 4,21  | 33,00 |
| GO:0032269 | negative regulation of cellular protein metabolic process | GO_BiologicalProcess-EBI-UniProt-GOA-ACAP-ARAP_08.05.2020_00h00 | 0,00020134  | 0,001035927 | 1,45453E-11 | 6,4727E-10 | [4, 5, 6, 7] | Group187 | 4,45  | 49,00 |
| GO:0042177 | negative regulation of protein catabolic process          | GO_BiologicalProcess-EBI-UniProt-GOA-ACAP-ARAP_08.05.2020_00h00 | 0,032142218 | 0,048748184 | 1,45453E-11 | 6,4727E-10 | [4, 5, 6, 7] | Group187 | 5,67  | 8,00  |
| GO:0042981 | regulation of apoptotic process                           | GO_BiologicalProcess-EBI-UniProt-GOA-ACAP-ARAP_08.05.2020_00h00 | 1,11326E-06 | 1,33174E-05 | 1,45453E-11 | 6,4727E-10 | [5, 6]       | Group187 | 4,59  | 75,00 |
| GO:0043065 | positive regulation of apoptotic process                  | GO_BiologicalProcess-EBI-UniProt-GOA-ACAP-ARAP_08.05.2020_00h00 | 5,25908E-05 | 0,000362082 | 1,45453E-11 | 6,4727E-10 | [5, 6, 7]    | Group187 | 5,29  | 36,00 |
| GO:0045861 | negative regulation of proteolysis                        | GO_BiologicalProcess-EBI-UniProt-GOA-ACAP-ARAP_08.05.2020_00h00 | 0,006054374 | 0,013861331 | 1,45453E-11 | 6,4727E-10 | [5, 6, 7, 8] | Group187 | 4,96  | 19,00 |
| GO:0045862 | positive regulation of proteolysis                        | GO_BiologicalProcess-EBI-UniProt-GOA-ACAP-ARAP_08.05.2020_00h00 | 0,023925476 | 0,039273895 | 1,45453E-11 | 6,4727E-10 | [5, 6, 7, 8] | Group187 | 4,45  | 17,00 |
| GO:0070011 | peptidase activity, acting on L-amino acid peptides       | GO_BiologicalProcess-EBI-UniProt-GOA-ACAP-ARAP_08.05.2020_00h00 | 0,00039584  | 0,00177018  | 1,45453E-11 | 6,4727E-10 | [6, 7]       | Group187 | 4,37  | 47,00 |
| GO:0004175 | endopeptidase activity                                    | GO_BiologicalProcess-EBI-UniProt-GOA-ACAP-ARAP_08.05.2020_00h00 | 0,000555813 | 0,002282888 | 1,45453E-11 | 6,4727E-10 | [7, 8]       | Group187 | 4,52  | 40,00 |
| GO:0008234 | cysteine-type peptidase activity                          | GO_BiologicalProcess-EBI-UniProt-GOA-ACAP-ARAP_08.05.2020_00h00 | 0,000334646 | 0,001554642 | 1,45453E-11 | 6,4727E-10 | [7, 8]       | Group187 | 5,49  | 26,00 |
| GO:0010952 | positive regulation of peptidase activity                 | GO_BiologicalProcess-EBI-UniProt-GOA-ACAP-ARAP_08.05.2020_00h00 | 0,000395714 | 0,001777926 | 1,45453E-11 | 6,4727E-10 | [6, 7, 8, 9] | Group187 | 7,21  | 15,00 |

|            |                                                                                           |                                                                 |             |             |             |            |                                 |          |       |       |
|------------|-------------------------------------------------------------------------------------------|-----------------------------------------------------------------|-------------|-------------|-------------|------------|---------------------------------|----------|-------|-------|
| GO:0052548 | regulation of endopeptidase activity                                                      | GO_BiologicalProcess-EBI-UniProt-GOA-ACAP-ARAP_08.05.2020_00h00 | 0,000937128 | 0,003333945 | 1,45453E-11 | 6,4727E-10 | [6, 7, 8, 9]                    | Group187 | 5,29  | 24,00 |
| GO:0097153 | cysteine-type endopeptidase activity involved in apoptotic process                        | GO_BiologicalProcess-EBI-UniProt-GOA-ACAP-ARAP_08.05.2020_00h00 | 0,000249894 | 0,001232725 | 1,45453E-11 | 6,4727E-10 | [5, 9, 10]                      | Group187 | 6,97  | 17,00 |
| GO:0004197 | cysteine-type endopeptidase activity                                                      | GO_BiologicalProcess-EBI-UniProt-GOA-ACAP-ARAP_08.05.2020_00h00 | 0,000848939 | 0,003089106 | 1,45453E-11 | 6,4727E-10 | [8, 9]                          | Group187 | 5,65  | 21,00 |
| GO:0010951 | negative regulation of endopeptidase activity                                             | GO_BiologicalProcess-EBI-UniProt-GOA-ACAP-ARAP_08.05.2020_00h00 | 0,013479644 | 0,025748543 | 1,45453E-11 | 6,4727E-10 | [7, 8, 9, 10]                   | Group187 | 5,11  | 14,00 |
| GO:0033135 | regulation of peptidyl-serine phosphorylation                                             | GO_BiologicalProcess-EBI-UniProt-GOA-ACAP-ARAP_08.05.2020_00h00 | 0,011230711 | 0,022437977 | 1,45453E-11 | 6,4727E-10 | [7, 8, 9, 10]                   | Group187 | 6,10  | 10,00 |
| GO:0043281 | regulation of cysteine-type endopeptidase activity involved in apoptotic process          | GO_BiologicalProcess-EBI-UniProt-GOA-ACAP-ARAP_08.05.2020_00h00 | 0,000159916 | 0,000884625 | 1,45453E-11 | 6,4727E-10 | [6, 7, 8, 9, 10, 11]            | Group187 | 7,23  | 17,00 |
| GO:0043027 | cysteine-type endopeptidase inhibitor activity involved in apoptotic process              | GO_BiologicalProcess-EBI-UniProt-GOA-ACAP-ARAP_08.05.2020_00h00 | 0,032678593 | 0,04924947  | 1,45453E-11 | 6,4727E-10 | [5, 6, 7, 8, 9, 10, 11, 12, 13] | Group187 | 11,11 | 3,00  |
| GO:0043154 | negative regulation of cysteine-type endopeptidase activity involved in apoptotic process | GO_BiologicalProcess-EBI-UniProt-GOA-ACAP-ARAP_08.05.2020_00h00 | 0,000993196 | 0,003468936 | 1,45453E-11 | 6,4727E-10 | [6, 7, 8, 9, 10, 11, 12]        | Group187 | 9,28  | 9,00  |
| GO:0043280 | positive regulation of cysteine-type endopeptidase activity involved in apoptotic process | GO_BiologicalProcess-EBI-UniProt-GOA-ACAP-ARAP_08.05.2020_00h00 | 0,000360827 | 0,001652209 | 1,45453E-11 | 6,4727E-10 | [6, 7, 8, 9, 10, 11, 12]        | Group187 | 8,45  | 12,00 |
| GO:1902895 | positive regulation of pri-miRNA transcription by RNA polymerase II                       | GO_BiologicalProcess-EBI-UniProt-GOA-ACAP-ARAP_08.05.2020_00h00 | 0,000732948 | 0,002794546 | 1,11787E-11 | 6,6327E-10 | [7, 8, 9, 10, 11, 12, 13]       | Group191 | 14,29 | 6,00  |
| GO:0033002 | muscle cell proliferation                                                                 | GO_BiologicalProcess-EBI-UniProt-GOA-ACAP-ARAP_08.05.2020_00h00 | 3,12928E-05 | 0,000233963 | 1,11787E-11 | 6,6327E-10 | [3]                             | Group191 | 8,25  | 17,00 |
| GO:0050673 | epithelial cell proliferation                                                             | GO_BiologicalProcess-EBI-UniProt-GOA-ACAP-ARAP_08.05.2020_00h00 | 3,83793E-06 | 3,94935E-05 | 1,11787E-11 | 6,6327E-10 | [3]                             | Group191 | 6,71  | 29,00 |
| GO:0035019 | somatic stem cell population maintenance                                                  | GO_BiologicalProcess-EBI-UniProt-GOA-ACAP-ARAP_08.05.2020_00h00 | 0,020465165 | 0,034911167 | 1,11787E-11 | 6,6327E-10 | [3, 4]                          | Group191 | 7,32  | 6,00  |
| GO:0001935 | endothelial cell proliferation                                                            | GO_BiologicalProcess-EBI-UniProt-GOA-ACAP-ARAP_08.05.2020_00h00 | 0,003633375 | 0,00934715  | 1,11787E-11 | 6,6327E-10 | [4]                             | Group191 | 6,79  | 11,00 |
| GO:0008284 | positive regulation of cell population proliferation                                      | GO_BiologicalProcess-EBI-UniProt-GOA-ACAP-ARAP_08.05.2020_00h00 | 8,18119E-08 | 1,37358E-06 | 1,11787E-11 | 6,6327E-10 | [3, 4, 5]                       | Group191 | 5,61  | 55,00 |
| GO:0046620 | regulation of organ growth                                                                | GO_BiologicalProcess-EBI-UniProt-GOA-ACAP-ARAP_08.05.2020_00h00 | 0,024403341 | 0,039853238 | 1,11787E-11 | 6,6327E-10 | [3, 4, 5]                       | Group191 | 6,42  | 7,00  |
| GO:0048659 | smooth muscle cell proliferation                                                          | GO_BiologicalProcess-EBI-UniProt-GOA-ACAP-ARAP_08.05.2020_00h00 | 0,000131848 | 0,000764721 | 1,11787E-11 | 6,6327E-10 | [4]                             | Group191 | 8,84  | 13,00 |
| GO:0062013 | positive regulation of small molecule metabolic process                                   | GO_BiologicalProcess-EBI-UniProt-GOA-ACAP-ARAP_08.05.2020_00h00 | 0,008775524 | 0,018580036 | 1,11787E-11 | 6,6327E-10 | [3, 4, 5]                       | Group191 | 6,33  | 10,00 |
| GO:0006109 | regulation of carbohydrate metabolic process                                              | GO_BiologicalProcess-EBI-UniProt-GOA-ACAP-ARAP_08.05.2020_00h00 | 0,006973192 | 0,015555582 | 1,11787E-11 | 6,6327E-10 | [4, 5]                          | Group191 | 5,73  | 13,00 |
| GO:0045913 | positive regulation of carbohydrate metabolic process                                     | GO_BiologicalProcess-EBI-UniProt-GOA-ACAP-ARAP_08.05.2020_00h00 | 0,002461149 | 0,007094337 | 1,11787E-11 | 6,6327E-10 | [3, 4, 5, 6]                    | Group191 | 8,89  | 8,00  |
| GO:0048660 | regulation of smooth muscle cell proliferation                                            | GO_BiologicalProcess-EBI-UniProt-GOA-ACAP-ARAP_08.05.2020_00h00 | 0,000114782 | 0,000695231 | 1,11787E-11 | 6,6327E-10 | [4, 5]                          | Group191 | 8,97  | 13,00 |
| GO:0050678 | regulation of epithelial cell proliferation                                               | GO_BiologicalProcess-EBI-UniProt-GOA-ACAP-ARAP_08.05.2020_00h00 | 4,34628E-05 | 0,000310403 | 1,11787E-11 | 6,6327E-10 | [4, 5]                          | Group191 | 6,50  | 24,00 |

|            |                                                                    |                                                                 |             |             |             |            |                       |          |       |       |
|------------|--------------------------------------------------------------------|-----------------------------------------------------------------|-------------|-------------|-------------|------------|-----------------------|----------|-------|-------|
| GO:1903035 | negative regulation of response to wounding                        | GO_BiologicalProcess-EBI-UniProt-GOA-ACAP-ARAP_08.05.2020_00h00 | 0,005007775 | 0,011891912 | 1,11787E-11 | 6,6327E-10 | [3, 4, 5, 6]          | Group191 | 7,92  | 8,00  |
| GO:0010631 | epithelial cell migration                                          | GO_BiologicalProcess-EBI-UniProt-GOA-ACAP-ARAP_08.05.2020_00h00 | 0,00018162  | 0,00096028  | 1,11787E-11 | 6,6327E-10 | [4, 5, 6]             | Group191 | 6,51  | 20,00 |
| GO:0010632 | regulation of epithelial cell migration                            | GO_BiologicalProcess-EBI-UniProt-GOA-ACAP-ARAP_08.05.2020_00h00 | 0,000186103 | 0,000978573 | 1,11787E-11 | 6,6327E-10 | [3, 4, 5, 6, 7]       | Group191 | 7,14  | 17,00 |
| GO:0030193 | regulation of blood coagulation                                    | GO_BiologicalProcess-EBI-UniProt-GOA-ACAP-ARAP_08.05.2020_00h00 | 0,000625023 | 0,002481938 | 1,11787E-11 | 6,6327E-10 | [3, 4, 5, 6, 7]       | Group191 | 9,89  | 9,00  |
| GO:0043255 | regulation of carbohydrate biosynthetic process                    | GO_BiologicalProcess-EBI-UniProt-GOA-ACAP-ARAP_08.05.2020_00h00 | 0,024403341 | 0,039853238 | 1,11787E-11 | 6,6327E-10 | [4, 5, 6]             | Group191 | 6,42  | 7,00  |
| GO:0044344 | cellular response to fibroblast growth factor stimulus             | GO_BiologicalProcess-EBI-UniProt-GOA-ACAP-ARAP_08.05.2020_00h00 | 0,033316683 | 0,049818851 | 1,11787E-11 | 6,6327E-10 | [4, 6]                | Group191 | 5,63  | 8,00  |
| GO:0048661 | positive regulation of smooth muscle cell proliferation            | GO_BiologicalProcess-EBI-UniProt-GOA-ACAP-ARAP_08.05.2020_00h00 | 0,00013222  | 0,000762259 | 1,11787E-11 | 6,6327E-10 | [4, 5, 6]             | Group191 | 10,99 | 10,00 |
| GO:0050679 | positive regulation of epithelial cell proliferation               | GO_BiologicalProcess-EBI-UniProt-GOA-ACAP-ARAP_08.05.2020_00h00 | 0,00018895  | 0,000982745 | 1,11787E-11 | 6,6327E-10 | [4, 5, 6]             | Group191 | 7,41  | 16,00 |
| GO:0090288 | negative regulation of cellular response to growth factor stimulus | GO_BiologicalProcess-EBI-UniProt-GOA-ACAP-ARAP_08.05.2020_00h00 | 0,012154936 | 0,023885572 | 1,11787E-11 | 6,6327E-10 | [3, 4, 5, 6, 7]       | Group191 | 6,02  | 10,00 |
| GO:0101023 | vascular endothelial cell proliferation                            | GO_BiologicalProcess-EBI-UniProt-GOA-ACAP-ARAP_08.05.2020_00h00 | 0,026696119 | 0,042651396 | 1,11787E-11 | 6,6327E-10 | [5]                   | Group191 | 12,00 | 3,00  |
| GO:1990874 | vascular smooth muscle cell proliferation                          | GO_BiologicalProcess-EBI-UniProt-GOA-ACAP-ARAP_08.05.2020_00h00 | 0,003044682 | 0,008138997 | 1,11787E-11 | 6,6327E-10 | [5]                   | Group191 | 10,91 | 6,00  |
| GO:0001936 | regulation of endothelial cell proliferation                       | GO_BiologicalProcess-EBI-UniProt-GOA-ACAP-ARAP_08.05.2020_00h00 | 0,014143549 | 0,026282284 | 1,11787E-11 | 6,6327E-10 | [5, 6]                | Group191 | 6,21  | 9,00  |
| GO:0010634 | positive regulation of epithelial cell migration                   | GO_BiologicalProcess-EBI-UniProt-GOA-ACAP-ARAP_08.05.2020_00h00 | 0,000839522 | 0,003066498 | 1,11787E-11 | 6,6327E-10 | [3, 4, 5, 6, 7, 8]    | Group191 | 7,69  | 12,00 |
| GO:0014909 | smooth muscle cell migration                                       | GO_BiologicalProcess-EBI-UniProt-GOA-ACAP-ARAP_08.05.2020_00h00 | 0,000144714 | 0,000819473 | 1,11787E-11 | 6,6327E-10 | [5, 6]                | Group191 | 12,00 | 9,00  |
| GO:1904705 | regulation of vascular smooth muscle cell proliferation            | GO_BiologicalProcess-EBI-UniProt-GOA-ACAP-ARAP_08.05.2020_00h00 | 0,003044682 | 0,008138997 | 1,11787E-11 | 6,6327E-10 | [5, 6]                | Group191 | 10,91 | 6,00  |
| GO:0001938 | positive regulation of endothelial cell proliferation              | GO_BiologicalProcess-EBI-UniProt-GOA-ACAP-ARAP_08.05.2020_00h00 | 0,02131371  | 0,036101274 | 1,11787E-11 | 6,6327E-10 | [5, 6, 7]             | Group191 | 6,60  | 7,00  |
| GO:0010594 | regulation of endothelial cell migration                           | GO_BiologicalProcess-EBI-UniProt-GOA-ACAP-ARAP_08.05.2020_00h00 | 0,000681572 | 0,002640746 | 1,11787E-11 | 6,6327E-10 | [4, 5, 6, 7, 8]       | Group191 | 7,47  | 13,00 |
| GO:0014910 | regulation of smooth muscle cell migration                         | GO_BiologicalProcess-EBI-UniProt-GOA-ACAP-ARAP_08.05.2020_00h00 | 0,000348865 | 0,001605114 | 1,11787E-11 | 6,6327E-10 | [5, 6, 7]             | Group191 | 11,94 | 8,00  |
| GO:0043542 | endothelial cell migration                                         | GO_BiologicalProcess-EBI-UniProt-GOA-ACAP-ARAP_08.05.2020_00h00 | 0,000331147 | 0,001553468 | 1,11787E-11 | 6,6327E-10 | [5, 6, 7]             | Group191 | 7,05  | 16,00 |
| GO:1901343 | negative regulation of vasculature development                     | GO_BiologicalProcess-EBI-UniProt-GOA-ACAP-ARAP_08.05.2020_00h00 | 0,028789286 | 0,045166142 | 1,11787E-11 | 6,6327E-10 | [3, 4, 5, 6, 7, 8, 9] | Group191 | 5,80  | 8,00  |
| GO:1904707 | positive regulation of vascular smooth muscle cell proliferation   | GO_BiologicalProcess-EBI-UniProt-GOA-ACAP-ARAP_08.05.2020_00h00 | 0,015443421 | 0,028044315 | 1,11787E-11 | 6,6327E-10 | [5, 6, 7]             | Group191 | 10,81 | 4,00  |
| GO:0010595 | positive regulation of endothelial cell migration                  | GO_BiologicalProcess-EBI-UniProt-GOA-ACAP-ARAP_08.05.2020_00h00 | 0,00920515  | 0,019361163 | 1,11787E-11 | 6,6327E-10 | [4, 5, 6, 7, 8, 9]    | Group191 | 7,14  | 8,00  |
| GO:0014911 | positive regulation of smooth muscle cell migration                | GO_BiologicalProcess-EBI-UniProt-GOA-ACAP-ARAP_08.05.2020_00h00 | 0,000943803 | 0,003345259 | 1,11787E-11 | 6,6327E-10 | [5, 6, 7, 8]          | Group191 | 13,64 | 6,00  |



|            |                                                                                |                                                                 |             |             |             |            |                             |          |       |        |
|------------|--------------------------------------------------------------------------------|-----------------------------------------------------------------|-------------|-------------|-------------|------------|-----------------------------|----------|-------|--------|
| GO:0030212 | hyaluronan metabolic process                                                   | GO_BiologicalProcess-EBI-UniProt-GOA-ACAP-ARAP_08.05.2020_00h00 | 0,005625159 | 0,013066206 | 1,11787E-11 | 6,6327E-10 | [6, 7]                      | Group191 | 11,36 | 5,00   |
| GO:0042730 | fibrinolysis                                                                   | GO_BiologicalProcess-EBI-UniProt-GOA-ACAP-ARAP_08.05.2020_00h00 | 0,007393209 | 0,016265061 | 1,11787E-11 | 6,6327E-10 | [4, 5, 6, 7, 8, 9]          | Group191 | 13,33 | 4,00   |
| GO:0040037 | negative regulation of fibroblast growth factor receptor signaling pathway     | GO_BiologicalProcess-EBI-UniProt-GOA-ACAP-ARAP_08.05.2020_00h00 | 0,012620698 | 0,024499003 | 1,11787E-11 | 6,6327E-10 | [4, 5, 6, 7, 8, 9, 10]      | Group191 | 15,79 | 3,00   |
| GO:0043535 | regulation of blood vessel endothelial cell migration                          | GO_BiologicalProcess-EBI-UniProt-GOA-ACAP-ARAP_08.05.2020_00h00 | 0,004171744 | 0,010316174 | 1,11787E-11 | 6,6327E-10 | [5, 6, 7, 8, 9]             | Group191 | 8,16  | 8,00   |
| GO:0043550 | regulation of lipid kinase activity                                            | GO_BiologicalProcess-EBI-UniProt-GOA-ACAP-ARAP_08.05.2020_00h00 | 0,030797191 | 0,047081329 | 1,11787E-11 | 6,6327E-10 | [5, 6, 7, 8, 9]             | Group191 | 7,46  | 5,00   |
| GO:0055024 | regulation of cardiac muscle tissue development                                | GO_BiologicalProcess-EBI-UniProt-GOA-ACAP-ARAP_08.05.2020_00h00 | 0,008760029 | 0,018588355 | 1,11787E-11 | 6,6327E-10 | [5, 6, 7, 8, 9]             | Group191 | 7,87  | 7,00   |
| GO:1905564 | positive regulation of vascular endothelial cell proliferation                 | GO_BiologicalProcess-EBI-UniProt-GOA-ACAP-ARAP_08.05.2020_00h00 | 0,014564467 | 0,026855865 | 1,11787E-11 | 6,6327E-10 | [6, 7, 8]                   | Group191 | 15,00 | 3,00   |
| GO:0002040 | sprouting angiogenesis                                                         | GO_BiologicalProcess-EBI-UniProt-GOA-ACAP-ARAP_08.05.2020_00h00 | 0,00041584  | 0,001833911 | 1,11787E-11 | 6,6327E-10 | [4, 5, 6, 7, 8, 9, 10, 11]  | Group191 | 8,87  | 11,00  |
| GO:0031639 | plasminogen activation                                                         | GO_BiologicalProcess-EBI-UniProt-GOA-ACAP-ARAP_08.05.2020_00h00 | 0,003242962 | 0,008549627 | 1,11787E-11 | 6,6327E-10 | [7, 8]                      | Group191 | 16,67 | 4,00   |
| GO:0043536 | positive regulation of blood vessel endothelial cell migration                 | GO_BiologicalProcess-EBI-UniProt-GOA-ACAP-ARAP_08.05.2020_00h00 | 0,02016817  | 0,034589496 | 1,11787E-11 | 6,6327E-10 | [5, 6, 7, 8, 9, 10]         | Group191 | 8,33  | 5,00   |
| GO:0002043 | blood vessel endothelial cell proliferation involved in sprouting angiogenesis | GO_BiologicalProcess-EBI-UniProt-GOA-ACAP-ARAP_08.05.2020_00h00 | 0,00033793  | 0,001562316 | 1,11787E-11 | 6,6327E-10 | [5, 6, 7, 8, 9, 10, 11, 12] | Group191 | 20,83 | 5,00   |
| GO:0048583 | regulation of response to stimulus                                             | GO_BiologicalProcess-EBI-UniProt-GOA-ACAP-ARAP_08.05.2020_00h00 | 6,27191E-11 | 2,00074E-08 | 3,1323E-11  | 1,1151E-09 | [2, 3]                      | Group133 | 4,02  | 182,00 |
| GO:0033554 | cellular response to stress                                                    | GO_BiologicalProcess-EBI-UniProt-GOA-ACAP-ARAP_08.05.2020_00h00 | 1,66634E-08 | 3,98672E-07 | 3,1323E-11  | 1,1151E-09 | [3]                         | Group133 | 4,55  | 100,00 |
| GO:0048585 | negative regulation of response to stimulus                                    | GO_BiologicalProcess-EBI-UniProt-GOA-ACAP-ARAP_08.05.2020_00h00 | 1,4974E-08  | 3,67438E-07 | 3,1323E-11  | 1,1151E-09 | [2, 3, 4]                   | Group133 | 4,85  | 85,00  |
| GO:0080134 | regulation of response to stress                                               | GO_BiologicalProcess-EBI-UniProt-GOA-ACAP-ARAP_08.05.2020_00h00 | 1,20431E-08 | 3,20146E-07 | 3,1323E-11  | 1,1151E-09 | [3, 4]                      | Group133 | 5,05  | 78,00  |
| GO:0006974 | cellular response to DNA damage stimulus                                       | GO_BiologicalProcess-EBI-UniProt-GOA-ACAP-ARAP_08.05.2020_00h00 | 0,001050609 | 0,003642874 | 3,1323E-11  | 1,1151E-09 | [4]                         | Group133 | 4,38  | 40,00  |
| GO:0080135 | regulation of cellular response to stress                                      | GO_BiologicalProcess-EBI-UniProt-GOA-ACAP-ARAP_08.05.2020_00h00 | 5,18829E-08 | 9,54845E-07 | 3,1323E-11  | 1,1151E-09 | [3, 4, 5]                   | Group133 | 6,08  | 48,00  |
| GO:2001020 | regulation of response to DNA damage stimulus                                  | GO_BiologicalProcess-EBI-UniProt-GOA-ACAP-ARAP_08.05.2020_00h00 | 0,004286675 | 0,010465174 | 3,1323E-11  | 1,1151E-09 | [4, 5, 6]                   | Group133 | 5,86  | 14,00  |
| GO:0000187 | activation of MAPK activity                                                    | GO_BiologicalProcess-EBI-UniProt-GOA-ACAP-ARAP_08.05.2020_00h00 | 0,001091557 | 0,003744156 | 4,56071E-11 | 1,353E-09  | [7, 8, 9, 10, 11, 12, 13]   | Group193 | 6,80  | 14,00  |
| GO:0023051 | regulation of signaling                                                        | GO_BiologicalProcess-EBI-UniProt-GOA-ACAP-ARAP_08.05.2020_00h00 | 4,33256E-10 | 3,76933E-08 | 4,56071E-11 | 1,353E-09  | [2, 3]                      | Group193 | 4,12  | 158,00 |
| GO:0048583 | regulation of response to stimulus                                             | GO_BiologicalProcess-EBI-UniProt-GOA-ACAP-ARAP_08.05.2020_00h00 | 6,27191E-11 | 2,00074E-08 | 4,56071E-11 | 1,353E-09  | [2, 3]                      | Group193 | 4,02  | 182,00 |
| GO:0051239 | regulation of multicellular organismal process                                 | GO_BiologicalProcess-EBI-UniProt-GOA-ACAP-ARAP_08.05.2020_00h00 | 8,97701E-09 | 2,60333E-07 | 4,56071E-11 | 1,353E-09  | [2, 3]                      | Group193 | 4,10  | 140,00 |
| GO:0006793 | phosphorus metabolic process                                                   | GO_BiologicalProcess-EBI-UniProt-GOA-ACAP-ARAP_08.05.2020_00h00 | 6,13427E-09 | 2,09661E-07 | 4,56071E-11 | 1,353E-09  | [3]                         | Group193 | 4,09  | 144,00 |

|            |                                                                 |                                                                 |             |             |             |           |           |          |      |        |
|------------|-----------------------------------------------------------------|-----------------------------------------------------------------|-------------|-------------|-------------|-----------|-----------|----------|------|--------|
| GO:0010033 | response to organic substance                                   | GO_BiologicalProcess-EBI-UniProt-GOA-ACAP-ARAP_08.05.2020_00h00 | 4,09467E-08 | 7,68353E-07 | 4,56071E-11 | 1,353E-09 | [3]       | Group193 | 4,00 | 141,00 |
| GO:0016772 | transferase activity, transferring phosphorus-containing groups | GO_MolecularFunction-EBI-UniProt-GOA-ACAP-ARAP_08.05.2020_00h00 | 2,30551E-06 | 2,53606E-05 | 4,56071E-11 | 1,353E-09 | [3]       | Group193 | 4,42 | 79,00  |
| GO:0023056 | positive regulation of signaling                                | GO_BiologicalProcess-EBI-UniProt-GOA-ACAP-ARAP_08.05.2020_00h00 | 6,42911E-11 | 1,53817E-08 | 4,56071E-11 | 1,353E-09 | [2, 3, 4] | Group193 | 5,00 | 102,00 |
| GO:0023057 | negative regulation of signaling                                | GO_BiologicalProcess-EBI-UniProt-GOA-ACAP-ARAP_08.05.2020_00h00 | 8,40763E-06 | 7,73663E-05 | 4,56071E-11 | 1,353E-09 | [2, 3, 4] | Group193 | 4,48 | 68,00  |
| GO:0044092 | negative regulation of molecular function                       | GO_BiologicalProcess-EBI-UniProt-GOA-ACAP-ARAP_08.05.2020_00h00 | 0,001134739 | 0,003864575 | 4,56071E-11 | 1,353E-09 | [3]       | Group193 | 4,07 | 51,00  |
| GO:0044093 | positive regulation of molecular function                       | GO_BiologicalProcess-EBI-UniProt-GOA-ACAP-ARAP_08.05.2020_00h00 | 6,68997E-11 | 1,28046E-08 | 4,56071E-11 | 1,353E-09 | [3]       | Group193 | 5,07 | 99,00  |
| GO:0048584 | positive regulation of response to stimulus                     | GO_BiologicalProcess-EBI-UniProt-GOA-ACAP-ARAP_08.05.2020_00h00 | 2,07976E-07 | 3,15925E-06 | 4,56071E-11 | 1,353E-09 | [2, 3, 4] | Group193 | 4,21 | 109,00 |
| GO:0048585 | negative regulation of response to stimulus                     | GO_BiologicalProcess-EBI-UniProt-GOA-ACAP-ARAP_08.05.2020_00h00 | 1,4974E-08  | 3,67438E-07 | 4,56071E-11 | 1,353E-09 | [2, 3, 4] | Group193 | 4,85 | 85,00  |
| GO:0050790 | regulation of catalytic activity                                | GO_BiologicalProcess-EBI-UniProt-GOA-ACAP-ARAP_08.05.2020_00h00 | 1,121E-08   | 3,06514E-07 | 4,56071E-11 | 1,353E-09 | [3]       | Group193 | 4,41 | 112,00 |
| GO:0051240 | positive regulation of multicellular organismal process         | GO_BiologicalProcess-EBI-UniProt-GOA-ACAP-ARAP_08.05.2020_00h00 | 3,52846E-07 | 5,03991E-06 | 4,56071E-11 | 1,353E-09 | [2, 3, 4] | Group193 | 4,50 | 86,00  |
| GO:0051241 | negative regulation of multicellular organismal process         | GO_BiologicalProcess-EBI-UniProt-GOA-ACAP-ARAP_08.05.2020_00h00 | 0,001074145 | 0,003697685 | 4,56071E-11 | 1,353E-09 | [2, 3, 4] | Group193 | 4,04 | 53,00  |
| GO:0010646 | regulation of cell communication                                | GO_BiologicalProcess-EBI-UniProt-GOA-ACAP-ARAP_08.05.2020_00h00 | 3,57848E-10 | 3,4246E-08  | 4,56071E-11 | 1,353E-09 | [3, 4]    | Group193 | 4,14 | 157,00 |
| GO:0010941 | regulation of cell death                                        | GO_BiologicalProcess-EBI-UniProt-GOA-ACAP-ARAP_08.05.2020_00h00 | 3,69996E-07 | 5,20716E-06 | 4,56071E-11 | 1,353E-09 | [3, 4]    | Group193 | 4,57 | 82,00  |
| GO:0019637 | organophosphate metabolic process                               | GO_BiologicalProcess-EBI-UniProt-GOA-ACAP-ARAP_08.05.2020_00h00 | 0,000611052 | 0,002436569 | 4,56071E-11 | 1,353E-09 | [3, 4]    | Group193 | 4,26 | 48,00  |
| GO:0042127 | regulation of cell population proliferation                     | GO_BiologicalProcess-EBI-UniProt-GOA-ACAP-ARAP_08.05.2020_00h00 | 9,02399E-10 | 5,75731E-08 | 4,56071E-11 | 1,353E-09 | [3, 4]    | Group193 | 5,05 | 89,00  |
| GO:0080134 | regulation of response to stress                                | GO_BiologicalProcess-EBI-UniProt-GOA-ACAP-ARAP_08.05.2020_00h00 | 1,20431E-08 | 3,20146E-07 | 4,56071E-11 | 1,353E-09 | [3, 4]    | Group193 | 5,05 | 78,00  |
| GO:2000026 | regulation of multicellular organismal development              | GO_BiologicalProcess-EBI-UniProt-GOA-ACAP-ARAP_08.05.2020_00h00 | 3,43602E-09 | 1,42968E-07 | 4,56071E-11 | 1,353E-09 | [3, 4]    | Group193 | 4,64 | 103,00 |
| GO:0006796 | phosphate-containing compound metabolic process                 | GO_BiologicalProcess-EBI-UniProt-GOA-ACAP-ARAP_08.05.2020_00h00 | 2,32844E-08 | 5,06435E-07 | 4,56071E-11 | 1,353E-09 | [4]       | Group193 | 4,04 | 141,00 |
| GO:0007166 | cell surface receptor signaling pathway                         | GO_BiologicalProcess-EBI-UniProt-GOA-ACAP-ARAP_08.05.2020_00h00 | 2,092E-08   | 4,76678E-07 | 4,56071E-11 | 1,353E-09 | [3, 4, 5] | Group193 | 4,08 | 137,00 |
| GO:0009966 | regulation of signal transduction                               | GO_BiologicalProcess-EBI-UniProt-GOA-ACAP-ARAP_08.05.2020_00h00 | 2,92397E-09 | 1,27193E-07 | 4,56071E-11 | 1,353E-09 | [3, 4, 5] | Group193 | 4,19 | 138,00 |
| GO:0010647 | positive regulation of cell communication                       | GO_BiologicalProcess-EBI-UniProt-GOA-ACAP-ARAP_08.05.2020_00h00 | 1,14659E-10 | 1,56756E-08 | 4,56071E-11 | 1,353E-09 | [3, 4, 5] | Group193 | 4,98 | 101,00 |
| GO:0010648 | negative regulation of cell communication                       | GO_BiologicalProcess-EBI-UniProt-GOA-ACAP-ARAP_08.05.2020_00h00 | 7,87514E-06 | 7,317E-05   | 4,56071E-11 | 1,353E-09 | [3, 4, 5] | Group193 | 4,49 | 68,00  |
| GO:0016773 | phosphotransferase activity, alcohol group as acceptor          | GO_MolecularFunction-EBI-UniProt-GOA-ACAP-ARAP_08.05.2020_00h00 | 3,23306E-05 | 0,000239848 | 4,56071E-11 | 1,353E-09 | [4]       | Group193 | 4,40 | 63,00  |

|            |                                                   |                                                                 |             |             |             |           |              |          |      |        |
|------------|---------------------------------------------------|-----------------------------------------------------------------|-------------|-------------|-------------|-----------|--------------|----------|------|--------|
| GO:0030234 | enzyme regulator activity                         | GO_BiologicalProcess-EBI-UniProt-GOA-ACAP-ARAP_08.05.2020_00h00 | 0,000976118 | 0,003447031 | 4,56071E-11 | 1,353E-09 | [4]          | Group193 | 4,17 | 48,00  |
| GO:0035556 | intracellular signal transduction                 | GO_BiologicalProcess-EBI-UniProt-GOA-ACAP-ARAP_08.05.2020_00h00 | 1,26934E-09 | 6,39346E-08 | 4,56071E-11 | 1,353E-09 | [3, 4, 5]    | Group193 | 4,34 | 130,00 |
| GO:0043085 | positive regulation of catalytic activity         | GO_BiologicalProcess-EBI-UniProt-GOA-ACAP-ARAP_08.05.2020_00h00 | 1,27347E-09 | 6,09358E-08 | 4,56071E-11 | 1,353E-09 | [4]          | Group193 | 5,20 | 82,00  |
| GO:0043086 | negative regulation of catalytic activity         | GO_BiologicalProcess-EBI-UniProt-GOA-ACAP-ARAP_08.05.2020_00h00 | 0,003219853 | 0,008512152 | 4,56071E-11 | 1,353E-09 | [4]          | Group193 | 4,20 | 37,00  |
| GO:0051336 | regulation of hydrolase activity                  | GO_BiologicalProcess-EBI-UniProt-GOA-ACAP-ARAP_08.05.2020_00h00 | 8,71715E-06 | 7,94506E-05 | 4,56071E-11 | 1,353E-09 | [4]          | Group193 | 4,59 | 63,00  |
| GO:0051338 | regulation of transferase activity                | GO_BiologicalProcess-EBI-UniProt-GOA-ACAP-ARAP_08.05.2020_00h00 | 2,2116E-07  | 3,30703E-06 | 4,56071E-11 | 1,353E-09 | [4]          | Group193 | 5,31 | 58,00  |
| GO:0071310 | cellular response to organic substance            | GO_BiologicalProcess-EBI-UniProt-GOA-ACAP-ARAP_08.05.2020_00h00 | 3,0656E-08  | 6,24208E-07 | 4,56071E-11 | 1,353E-09 | [4]          | Group193 | 4,21 | 122,00 |
| GO:0009967 | positive regulation of signal transduction        | GO_BiologicalProcess-EBI-UniProt-GOA-ACAP-ARAP_08.05.2020_00h00 | 4,99385E-09 | 1,91165E-07 | 4,56071E-11 | 1,353E-09 | [3, 4, 5, 6] | Group193 | 4,92 | 87,00  |
| GO:0009968 | negative regulation of signal transduction        | GO_BiologicalProcess-EBI-UniProt-GOA-ACAP-ARAP_08.05.2020_00h00 | 6,11198E-07 | 8,01255E-06 | 4,56071E-11 | 1,353E-09 | [3, 4, 5, 6] | Group193 | 4,89 | 66,00  |
| GO:0051246 | regulation of protein metabolic process           | GO_BiologicalProcess-EBI-UniProt-GOA-ACAP-ARAP_08.05.2020_00h00 | 1,25694E-08 | 3,25106E-07 | 4,56071E-11 | 1,353E-09 | [4, 5]       | Group193 | 4,21 | 127,00 |
| GO:0007167 | enzyme linked receptor protein signaling pathway  | GO_BiologicalProcess-EBI-UniProt-GOA-ACAP-ARAP_08.05.2020_00h00 | 3,81246E-06 | 3,96579E-05 | 4,56071E-11 | 1,353E-09 | [4, 5, 6]    | Group193 | 4,96 | 55,00  |
| GO:0008047 | enzyme activator activity                         | GO_BiologicalProcess-EBI-UniProt-GOA-ACAP-ARAP_08.05.2020_00h00 | 0,000987177 | 0,003460544 | 4,56071E-11 | 1,353E-09 | [5]          | Group193 | 4,96 | 28,00  |
| GO:0016310 | phosphorylation                                   | GO_BiologicalProcess-EBI-UniProt-GOA-ACAP-ARAP_08.05.2020_00h00 | 8,61421E-08 | 1,42135E-06 | 4,56071E-11 | 1,353E-09 | [5]          | Group193 | 4,27 | 110,00 |
| GO:0031098 | stress-activated protein kinase signaling cascade | GO_BiologicalProcess-EBI-UniProt-GOA-ACAP-ARAP_08.05.2020_00h00 | 0,011678319 | 0,023091221 | 4,56071E-11 | 1,353E-09 | [4, 5, 6]    | Group193 | 4,94 | 16,00  |
| GO:0032268 | regulation of cellular protein metabolic process  | GO_BiologicalProcess-EBI-UniProt-GOA-ACAP-ARAP_08.05.2020_00h00 | 6,44939E-09 | 2,1283E-07  | 4,56071E-11 | 1,353E-09 | [4, 5, 6]    | Group193 | 4,32 | 122,00 |
| GO:0043087 | regulation of GTPase activity                     | GO_BiologicalProcess-EBI-UniProt-GOA-ACAP-ARAP_08.05.2020_00h00 | 0,000172834 | 0,000924034 | 4,56071E-11 | 1,353E-09 | [5]          | Group193 | 5,53 | 28,00  |
| GO:0043491 | protein kinase B signaling                        | GO_BiologicalProcess-EBI-UniProt-GOA-ACAP-ARAP_08.05.2020_00h00 | 7,17147E-05 | 0,000466877 | 4,56071E-11 | 1,353E-09 | [4, 5, 6]    | Group193 | 7,20 | 19,00  |
| GO:0051247 | positive regulation of protein metabolic process  | GO_BiologicalProcess-EBI-UniProt-GOA-ACAP-ARAP_08.05.2020_00h00 | 6,97002E-09 | 2,15171E-07 | 4,56071E-11 | 1,353E-09 | [4, 5, 6]    | Group193 | 4,84 | 89,00  |
| GO:0051248 | negative regulation of protein metabolic process  | GO_BiologicalProcess-EBI-UniProt-GOA-ACAP-ARAP_08.05.2020_00h00 | 0,000265156 | 0,001301303 | 4,56071E-11 | 1,353E-09 | [4, 5, 6]    | Group193 | 4,34 | 51,00  |
| GO:0051345 | positive regulation of hydrolase activity         | GO_BiologicalProcess-EBI-UniProt-GOA-ACAP-ARAP_08.05.2020_00h00 | 9,69574E-06 | 8,7536E-05  | 4,56071E-11 | 1,353E-09 | [5]          | Group193 | 5,30 | 43,00  |
| GO:0051347 | positive regulation of transferase activity       | GO_BiologicalProcess-EBI-UniProt-GOA-ACAP-ARAP_08.05.2020_00h00 | 1,65631E-06 | 1,93304E-05 | 4,56071E-11 | 1,353E-09 | [5]          | Group193 | 5,68 | 43,00  |
| GO:0051348 | negative regulation of transferase activity       | GO_BiologicalProcess-EBI-UniProt-GOA-ACAP-ARAP_08.05.2020_00h00 | 0,005998993 | 0,013800568 | 4,56071E-11 | 1,353E-09 | [5]          | Group193 | 5,32 | 16,00  |
| GO:1902531 | regulation of intracellular signal transduction   | GO_BiologicalProcess-EBI-UniProt-GOA-ACAP-ARAP_08.05.2020_00h00 | 7,94893E-07 | 1,01428E-05 | 4,56071E-11 | 1,353E-09 | [4, 5, 6]    | Group193 | 4,43 | 85,00  |

|            |                                                           |                                                                 |             |             |             |           |                  |          |      |       |
|------------|-----------------------------------------------------------|-----------------------------------------------------------------|-------------|-------------|-------------|-----------|------------------|----------|------|-------|
| GO:0023014 | signal transduction by protein phosphorylation            | GO_BiologicalProcess-EBI-UniProt-GOA-ACAP-ARAP_08.05.2020_00h00 | 6,64101E-07 | 8,58844E-06 | 4,56071E-11 | 1,353E-09 | [3, 4, 5, 7, 8]  | Group193 | 5,34 | 53,00 |
| GO:0019220 | regulation of phosphate metabolic process                 | GO_BiologicalProcess-EBI-UniProt-GOA-ACAP-ARAP_08.05.2020_00h00 | 1,73471E-08 | 4,04906E-07 | 4,56071E-11 | 1,353E-09 | [5, 6]           | Group193 | 4,71 | 91,00 |
| GO:0032269 | negative regulation of cellular protein metabolic process | GO_BiologicalProcess-EBI-UniProt-GOA-ACAP-ARAP_08.05.2020_00h00 | 0,00020134  | 0,001035927 | 4,56071E-11 | 1,353E-09 | [4, 5, 6, 7]     | Group193 | 4,45 | 49,00 |
| GO:0032270 | positive regulation of cellular protein metabolic process | GO_BiologicalProcess-EBI-UniProt-GOA-ACAP-ARAP_08.05.2020_00h00 | 5,27485E-09 | 1,94155E-07 | 4,56071E-11 | 1,353E-09 | [4, 5, 6, 7]     | Group193 | 4,96 | 85,00 |
| GO:0042981 | regulation of apoptotic process                           | GO_BiologicalProcess-EBI-UniProt-GOA-ACAP-ARAP_08.05.2020_00h00 | 1,11326E-06 | 1,33174E-05 | 4,56071E-11 | 1,353E-09 | [5, 6]           | Group193 | 4,59 | 75,00 |
| GO:1902532 | negative regulation of intracellular signal transduction  | GO_BiologicalProcess-EBI-UniProt-GOA-ACAP-ARAP_08.05.2020_00h00 | 4,25172E-05 | 0,000305932 | 4,56071E-11 | 1,353E-09 | [4, 5, 6, 7]     | Group193 | 5,72 | 31,00 |
| GO:1902533 | positive regulation of intracellular signal transduction  | GO_BiologicalProcess-EBI-UniProt-GOA-ACAP-ARAP_08.05.2020_00h00 | 3,51826E-06 | 3,69997E-05 | 4,56071E-11 | 1,353E-09 | [4, 5, 6, 7]     | Group193 | 4,97 | 55,00 |
| GO:0016301 | kinase activity                                           | GO_BiologicalProcess-EBI-UniProt-GOA-ACAP-ARAP_08.05.2020_00h00 | 5,86806E-06 | 5,78942E-05 | 4,56071E-11 | 1,353E-09 | [6]              | Group193 | 4,48 | 70,00 |
| GO:0031399 | regulation of protein modification process                | GO_BiologicalProcess-EBI-UniProt-GOA-ACAP-ARAP_08.05.2020_00h00 | 1,07623E-07 | 1,68845E-06 | 4,56071E-11 | 1,353E-09 | [5, 6, 7]        | Group193 | 4,55 | 90,00 |
| GO:0043547 | positive regulation of GTPase activity                    | GO_BiologicalProcess-EBI-UniProt-GOA-ACAP-ARAP_08.05.2020_00h00 | 0,000437988 | 0,001896626 | 4,56071E-11 | 1,353E-09 | [6]              | Group193 | 5,58 | 24,00 |
| GO:0045936 | negative regulation of phosphate metabolic process        | GO_BiologicalProcess-EBI-UniProt-GOA-ACAP-ARAP_08.05.2020_00h00 | 0,000540563 | 0,002239477 | 4,56071E-11 | 1,353E-09 | [5, 6, 7]        | Group193 | 5,02 | 30,00 |
| GO:0045937 | positive regulation of phosphate metabolic process        | GO_BiologicalProcess-EBI-UniProt-GOA-ACAP-ARAP_08.05.2020_00h00 | 1,12601E-09 | 6,73495E-08 | 4,56071E-11 | 1,353E-09 | [5, 6, 7]        | Group193 | 5,60 | 70,00 |
| GO:0051896 | regulation of protein kinase B signaling                  | GO_BiologicalProcess-EBI-UniProt-GOA-ACAP-ARAP_08.05.2020_00h00 | 0,000195626 | 0,001011969 | 4,56071E-11 | 1,353E-09 | [5, 6, 7]        | Group193 | 7,11 | 17,00 |
| GO:0000165 | MAPK cascade                                              | GO_BiologicalProcess-EBI-UniProt-GOA-ACAP-ARAP_08.05.2020_00h00 | 1,91283E-06 | 2,15362E-05 | 4,56071E-11 | 1,353E-09 | [4, 5, 6, 8, 9]  | Group193 | 5,24 | 51,00 |
| GO:0006468 | protein phosphorylation                                   | GO_BiologicalProcess-EBI-UniProt-GOA-ACAP-ARAP_08.05.2020_00h00 | 3,55363E-08 | 6,80165E-07 | 4,56071E-11 | 1,353E-09 | [6, 7]           | Group193 | 4,55 | 96,00 |
| GO:0031401 | positive regulation of protein modification process       | GO_BiologicalProcess-EBI-UniProt-GOA-ACAP-ARAP_08.05.2020_00h00 | 7,84556E-08 | 1,34075E-06 | 4,56071E-11 | 1,353E-09 | [5, 6, 7, 8]     | Group193 | 5,11 | 68,00 |
| GO:0042325 | regulation of phosphorylation                             | GO_BiologicalProcess-EBI-UniProt-GOA-ACAP-ARAP_08.05.2020_00h00 | 6,23797E-08 | 1,10551E-06 | 4,56071E-11 | 1,353E-09 | [6, 7]           | Group193 | 4,77 | 82,00 |
| GO:0051897 | positive regulation of protein kinase B signaling         | GO_BiologicalProcess-EBI-UniProt-GOA-ACAP-ARAP_08.05.2020_00h00 | 8,10058E-05 | 0,000506683 | 4,56071E-11 | 1,353E-09 | [5, 6, 7, 8]     | Group193 | 8,33 | 15,00 |
| GO:0043549 | regulation of kinase activity                             | GO_BiologicalProcess-EBI-UniProt-GOA-ACAP-ARAP_08.05.2020_00h00 | 1,8027E-06  | 2,05379E-05 | 4,56071E-11 | 1,353E-09 | [5, 7, 8]        | Group193 | 5,25 | 51,00 |
| GO:0001932 | regulation of protein phosphorylation                     | GO_BiologicalProcess-EBI-UniProt-GOA-ACAP-ARAP_08.05.2020_00h00 | 1,20031E-07 | 1,85273E-06 | 4,56071E-11 | 1,353E-09 | [6, 7, 8]        | Group193 | 4,86 | 75,00 |
| GO:0042326 | negative regulation of phosphorylation                    | GO_BiologicalProcess-EBI-UniProt-GOA-ACAP-ARAP_08.05.2020_00h00 | 0,001627748 | 0,005192518 | 4,56071E-11 | 1,353E-09 | [6, 7, 8]        | Group193 | 5,07 | 24,00 |
| GO:0042327 | positive regulation of phosphorylation                    | GO_BiologicalProcess-EBI-UniProt-GOA-ACAP-ARAP_08.05.2020_00h00 | 3,4551E-08  | 6,74801E-07 | 4,56071E-11 | 1,353E-09 | [6, 7, 8]        | Group193 | 5,40 | 63,00 |
| GO:0004707 | MAP kinase activity                                       | GO_BiologicalProcess-EBI-UniProt-GOA-ACAP-ARAP_08.05.2020_00h00 | 0,004993279 | 0,011916628 | 4,56071E-11 | 1,353E-09 | [5, 6, 7, 9, 10] | Group193 | 5,05 | 19,00 |

|            |                                                                         |                                                                 |             |             |             |            |                          |          |      |        |
|------------|-------------------------------------------------------------------------|-----------------------------------------------------------------|-------------|-------------|-------------|------------|--------------------------|----------|------|--------|
| GO:0070371 | ERK1 and ERK2 cascade                                                   | GO_BiologicalProcess-EBI-UniProt-GOA-ACAP-ARAP_08.05.2020_00h00 | 7,46413E-05 | 0,000479408 | 4,56071E-11 | 1,353E-09  | [5, 6, 7, 9, 10]         | Group193 | 6,59 | 22,00  |
| GO:0001933 | negative regulation of protein phosphorylation                          | GO_BiologicalProcess-EBI-UniProt-GOA-ACAP-ARAP_08.05.2020_00h00 | 0,004805825 | 0,011555714 | 4,56071E-11 | 1,353E-09  | [6, 7, 8, 9]             | Group193 | 4,88 | 21,00  |
| GO:0001934 | positive regulation of protein phosphorylation                          | GO_BiologicalProcess-EBI-UniProt-GOA-ACAP-ARAP_08.05.2020_00h00 | 4,44036E-07 | 6,07061E-06 | 4,56071E-11 | 1,353E-09  | [6, 7, 8, 9]             | Group193 | 5,24 | 57,00  |
| GO:0004672 | protein kinase activity                                                 | GO_BiologicalProcess-EBI-UniProt-GOA-ACAP-ARAP_08.05.2020_00h00 | 4,63941E-05 | 0,000324081 | 4,56071E-11 | 1,353E-09  | [7, 8]                   | Group193 | 4,46 | 58,00  |
| GO:0004693 | cyclin-dependent protein serine/threonine kinase activity               | GO_BiologicalProcess-EBI-UniProt-GOA-ACAP-ARAP_08.05.2020_00h00 | 0,000545112 | 0,002248586 | 4,56071E-11 | 1,353E-09  | [5, 6, 9, 10]            | Group193 | 8,59 | 11,00  |
| GO:0018209 | peptidyl-serine modification                                            | GO_BiologicalProcess-EBI-UniProt-GOA-ACAP-ARAP_08.05.2020_00h00 | 0,000275328 | 0,001337508 | 4,56071E-11 | 1,353E-09  | [7, 8]                   | Group193 | 6,01 | 22,00  |
| GO:0018212 | peptidyl-tyrosine modification                                          | GO_BiologicalProcess-EBI-UniProt-GOA-ACAP-ARAP_08.05.2020_00h00 | 0,00348192  | 0,00900594  | 4,56071E-11 | 1,353E-09  | [7, 8]                   | Group193 | 5,02 | 21,00  |
| GO:0033674 | positive regulation of kinase activity                                  | GO_BiologicalProcess-EBI-UniProt-GOA-ACAP-ARAP_08.05.2020_00h00 | 1,62283E-05 | 0,000136232 | 4,56071E-11 | 1,353E-09  | [6, 7, 8, 9]             | Group193 | 5,53 | 37,00  |
| GO:0043408 | regulation of MAPK cascade                                              | GO_BiologicalProcess-EBI-UniProt-GOA-ACAP-ARAP_08.05.2020_00h00 | 3,12878E-06 | 3,36432E-05 | 4,56071E-11 | 1,353E-09  | [5, 6, 7, 8, 9, 10]      | Group193 | 5,54 | 43,00  |
| GO:0045859 | regulation of protein kinase activity                                   | GO_BiologicalProcess-EBI-UniProt-GOA-ACAP-ARAP_08.05.2020_00h00 | 1,77981E-05 | 0,000148111 | 4,56071E-11 | 1,353E-09  | [6, 7, 8, 9]             | Group193 | 5,12 | 44,00  |
| GO:0000079 | regulation of cyclin-dependent protein serine/threonine kinase activity | GO_BiologicalProcess-EBI-UniProt-GOA-ACAP-ARAP_08.05.2020_00h00 | 0,001520331 | 0,004948833 | 4,56071E-11 | 1,353E-09  | [5, 6, 7, 8, 9, 10, 11]  | Group193 | 8,74 | 9,00   |
| GO:0018105 | peptidyl-serine phosphorylation                                         | GO_BiologicalProcess-EBI-UniProt-GOA-ACAP-ARAP_08.05.2020_00h00 | 0,000650843 | 0,00255269  | 4,56071E-11 | 1,353E-09  | [7, 8, 9]                | Group193 | 5,90 | 20,00  |
| GO:0043410 | positive regulation of MAPK cascade                                     | GO_BiologicalProcess-EBI-UniProt-GOA-ACAP-ARAP_08.05.2020_00h00 | 2,28998E-07 | 3,37156E-06 | 4,56071E-11 | 1,353E-09  | [5, 6, 7, 8, 9, 10, 11]  | Group193 | 6,54 | 38,00  |
| GO:0004674 | protein serine/threonine kinase activity                                | GO_BiologicalProcess-EBI-UniProt-GOA-ACAP-ARAP_08.05.2020_00h00 | 7,87337E-05 | 0,000495711 | 4,56071E-11 | 1,353E-09  | [8, 9]                   | Group193 | 4,80 | 44,00  |
| GO:0006469 | negative regulation of protein kinase activity                          | GO_BiologicalProcess-EBI-UniProt-GOA-ACAP-ARAP_08.05.2020_00h00 | 0,012703408 | 0,02460964  | 4,56071E-11 | 1,353E-09  | [7, 8, 9, 10]            | Group193 | 5,31 | 13,00  |
| GO:0043405 | regulation of MAP kinase activity                                       | GO_BiologicalProcess-EBI-UniProt-GOA-ACAP-ARAP_08.05.2020_00h00 | 0,00374708  | 0,009486654 | 4,56071E-11 | 1,353E-09  | [6, 7, 8, 9, 10, 11]     | Group193 | 5,19 | 19,00  |
| GO:0045860 | positive regulation of protein kinase activity                          | GO_BiologicalProcess-EBI-UniProt-GOA-ACAP-ARAP_08.05.2020_00h00 | 9,04722E-05 | 0,00056222  | 4,56071E-11 | 1,353E-09  | [7, 8, 9, 10]            | Group193 | 5,41 | 32,00  |
| GO:0070372 | regulation of ERK1 and ERK2 cascade                                     | GO_BiologicalProcess-EBI-UniProt-GOA-ACAP-ARAP_08.05.2020_00h00 | 0,001373574 | 0,004564272 | 4,56071E-11 | 1,353E-09  | [6, 7, 8, 9, 10, 11]     | Group193 | 5,83 | 18,00  |
| GO:0071900 | regulation of protein serine/threonine kinase activity                  | GO_BiologicalProcess-EBI-UniProt-GOA-ACAP-ARAP_08.05.2020_00h00 | 6,17963E-05 | 0,00041356  | 4,56071E-11 | 1,353E-09  | [7, 8, 9, 10]            | Group193 | 5,61 | 31,00  |
| GO:0070374 | positive regulation of ERK1 and ERK2 cascade                            | GO_BiologicalProcess-EBI-UniProt-GOA-ACAP-ARAP_08.05.2020_00h00 | 0,005401376 | 0,012638426 | 4,56071E-11 | 1,353E-09  | [6, 7, 8, 9, 10, 11, 12] | Group193 | 5,91 | 13,00  |
| GO:0032147 | activation of protein kinase activity                                   | GO_BiologicalProcess-EBI-UniProt-GOA-ACAP-ARAP_08.05.2020_00h00 | 2,21901E-05 | 0,000176966 | 4,56071E-11 | 1,353E-09  | [8, 9, 10, 11]           | Group193 | 6,48 | 26,00  |
| GO:0071902 | positive regulation of protein serine/threonine kinase activity         | GO_BiologicalProcess-EBI-UniProt-GOA-ACAP-ARAP_08.05.2020_00h00 | 0,000370646 | 0,00168108  | 4,56071E-11 | 1,353E-09  | [8, 9, 10, 11]           | Group193 | 5,88 | 22,00  |
| GO:0032879 | regulation of localization                                              | GO_BiologicalProcess-EBI-UniProt-GOA-ACAP-ARAP_08.05.2020_00h00 | 1,28192E-10 | 1,5335E-08  | 6,27813E-11 | 1,3969E-09 | [2, 3]                   | Group148 | 4,45 | 133,00 |

|            |                                                                             |                                                                 |             |             |             |            |                        |          |      |        |
|------------|-----------------------------------------------------------------------------|-----------------------------------------------------------------|-------------|-------------|-------------|------------|------------------------|----------|------|--------|
| GO:0040012 | regulation of locomotion                                                    | GO_BiologicalProcess-EBI-UniProt-GOA-ACAP-ARAP_08.05.2020_00h00 | 1,89996E-12 | 1,81826E-09 | 6,27813E-11 | 1,3969E-09 | [2, 3]                 | Group148 | 6,58 | 68,00  |
| GO:0048870 | cell motility                                                               | GO_BiologicalProcess-EBI-UniProt-GOA-ACAP-ARAP_08.05.2020_00h00 | 1,18486E-09 | 6,29948E-08 | 6,27813E-11 | 1,3969E-09 | [2, 3]                 | Group148 | 5,00 | 90,00  |
| GO:0051239 | regulation of multicellular organismal process                              | GO_BiologicalProcess-EBI-UniProt-GOA-ACAP-ARAP_08.05.2020_00h00 | 8,97701E-09 | 2,60333E-07 | 6,27813E-11 | 1,3969E-09 | [2, 3]                 | Group148 | 4,10 | 140,00 |
| GO:0032880 | regulation of protein localization                                          | GO_BiologicalProcess-EBI-UniProt-GOA-ACAP-ARAP_08.05.2020_00h00 | 0,001417178 | 0,004660617 | 6,27813E-11 | 1,3969E-09 | [3, 4]                 | Group148 | 4,12 | 47,00  |
| GO:0051049 | regulation of transport                                                     | GO_BiologicalProcess-EBI-UniProt-GOA-ACAP-ARAP_08.05.2020_00h00 | 6,30185E-05 | 0,00041881  | 6,27813E-11 | 1,3969E-09 | [3, 4]                 | Group148 | 4,00 | 81,00  |
| GO:0051050 | positive regulation of transport                                            | GO_BiologicalProcess-EBI-UniProt-GOA-ACAP-ARAP_08.05.2020_00h00 | 0,001033711 | 0,003597314 | 6,27813E-11 | 1,3969E-09 | [2, 3, 4, 5]           | Group148 | 4,20 | 46,00  |
| GO:0051270 | regulation of cellular component movement                                   | GO_BiologicalProcess-EBI-UniProt-GOA-ACAP-ARAP_08.05.2020_00h00 | 4,42024E-11 | 2,11509E-08 | 6,27813E-11 | 1,3969E-09 | [3, 4]                 | Group148 | 6,18 | 67,00  |
| GO:0060341 | regulation of cellular localization                                         | GO_BiologicalProcess-EBI-UniProt-GOA-ACAP-ARAP_08.05.2020_00h00 | 0,000142641 | 0,000812543 | 6,27813E-11 | 1,3969E-09 | [3, 4]                 | Group148 | 4,51 | 49,00  |
| GO:0040013 | negative regulation of locomotion                                           | GO_BiologicalProcess-EBI-UniProt-GOA-ACAP-ARAP_08.05.2020_00h00 | 0,002997997 | 0,008104755 | 5,61565E-11 | 1,428E-09  | [2, 3, 4]              | Group082 | 5,42 | 18,00  |
| GO:0051270 | regulation of cellular component movement                                   | GO_BiologicalProcess-EBI-UniProt-GOA-ACAP-ARAP_08.05.2020_00h00 | 4,42024E-11 | 2,11509E-08 | 5,61565E-11 | 1,428E-09  | [3, 4]                 | Group082 | 6,18 | 67,00  |
| GO:0051271 | negative regulation of cellular component movement                          | GO_BiologicalProcess-EBI-UniProt-GOA-ACAP-ARAP_08.05.2020_00h00 | 0,001396025 | 0,004606881 | 5,61565E-11 | 1,428E-09  | [3, 4, 5]              | Group082 | 5,67 | 19,00  |
| GO:0030336 | negative regulation of cell migration                                       | GO_BiologicalProcess-EBI-UniProt-GOA-ACAP-ARAP_08.05.2020_00h00 | 0,001381399 | 0,00457439  | 5,61565E-11 | 1,428E-09  | [4, 5, 6, 7]           | Group082 | 5,99 | 17,00  |
| GO:0002294 | CD4-positive, alpha-beta T cell differentiation involved in immune response | GO_BiologicalProcess-EBI-UniProt-GOA-ACAP-ARAP_08.05.2020_00h00 | 0,02291313  | 0,038135417 | 7,38011E-11 | 1,4596E-09 | [8, 9, 10, 11, 12, 13] | Group190 | 8,06 | 5,00   |
| GO:0040012 | regulation of locomotion                                                    | GO_BiologicalProcess-EBI-UniProt-GOA-ACAP-ARAP_08.05.2020_00h00 | 1,89996E-12 | 1,81826E-09 | 7,38011E-11 | 1,4596E-09 | [2, 3]                 | Group190 | 6,58 | 68,00  |
| GO:0045321 | leukocyte activation                                                        | GO_BiologicalProcess-EBI-UniProt-GOA-ACAP-ARAP_08.05.2020_00h00 | 7,48312E-05 | 0,000477423 | 7,38011E-11 | 1,4596E-09 | [2, 3]                 | Group190 | 4,32 | 61,00  |
| GO:0048870 | cell motility                                                               | GO_BiologicalProcess-EBI-UniProt-GOA-ACAP-ARAP_08.05.2020_00h00 | 1,18486E-09 | 6,29948E-08 | 7,38011E-11 | 1,4596E-09 | [2, 3]                 | Group190 | 5,00 | 90,00  |
| GO:0031589 | cell-substrate adhesion                                                     | GO_BiologicalProcess-EBI-UniProt-GOA-ACAP-ARAP_08.05.2020_00h00 | 3,26496E-10 | 3,47175E-08 | 7,38011E-11 | 1,4596E-09 | [3]                    | Group190 | 9,07 | 34,00  |
| GO:0051241 | negative regulation of multicellular organismal process                     | GO_BiologicalProcess-EBI-UniProt-GOA-ACAP-ARAP_08.05.2020_00h00 | 0,001074145 | 0,003697685 | 7,38011E-11 | 1,4596E-09 | [2, 3, 4]              | Group190 | 4,04 | 53,00  |
| GO:0098609 | cell-cell adhesion                                                          | GO_BiologicalProcess-EBI-UniProt-GOA-ACAP-ARAP_08.05.2020_00h00 | 3,39098E-08 | 6,76077E-07 | 7,38011E-11 | 1,4596E-09 | [3]                    | Group190 | 5,86 | 53,00  |
| GO:0002262 | myeloid cell homeostasis                                                    | GO_BiologicalProcess-EBI-UniProt-GOA-ACAP-ARAP_08.05.2020_00h00 | 0,000130379 | 0,000760808 | 7,38011E-11 | 1,4596E-09 | [2, 5]                 | Group190 | 8,38 | 14,00  |
| GO:0030155 | regulation of cell adhesion                                                 | GO_BiologicalProcess-EBI-UniProt-GOA-ACAP-ARAP_08.05.2020_00h00 | 1,32928E-08 | 3,34768E-07 | 7,38011E-11 | 1,4596E-09 | [3, 4]                 | Group190 | 6,36 | 48,00  |
| GO:0045595 | regulation of cell differentiation                                          | GO_BiologicalProcess-EBI-UniProt-GOA-ACAP-ARAP_08.05.2020_00h00 | 5,09874E-05 | 0,000353586 | 7,38011E-11 | 1,4596E-09 | [3, 4]                 | Group190 | 4,04 | 80,00  |
| GO:0046649 | lymphocyte activation                                                       | GO_BiologicalProcess-EBI-UniProt-GOA-ACAP-ARAP_08.05.2020_00h00 | 0,001648926 | 0,0052426   | 7,38011E-11 | 1,4596E-09 | [3, 4]                 | Group190 | 4,41 | 36,00  |

|            |                                                   |                                                                 |             |             |             |            |                    |          |       |       |
|------------|---------------------------------------------------|-----------------------------------------------------------------|-------------|-------------|-------------|------------|--------------------|----------|-------|-------|
| GO:0051270 | regulation of cellular component movement         | GO_BiologicalProcess-EBI-UniProt-GOA-ACAP-ARAP_08.05.2020_00h00 | 4,42024E-11 | 2,11509E-08 | 7,38011E-11 | 1,4596E-09 | [3, 4]             | Group190 | 6,18  | 67,00 |
| GO:0002520 | immune system development                         | GO_BiologicalProcess-EBI-UniProt-GOA-ACAP-ARAP_08.05.2020_00h00 | 5,84203E-07 | 7,76503E-06 | 7,38011E-11 | 1,4596E-09 | [2, 4, 5]          | Group190 | 5,23  | 56,00 |
| GO:0007159 | leukocyte cell-cell adhesion                      | GO_BiologicalProcess-EBI-UniProt-GOA-ACAP-ARAP_08.05.2020_00h00 | 0,000792809 | 0,002952212 | 7,38011E-11 | 1,4596E-09 | [4]                | Group190 | 5,68  | 21,00 |
| GO:0007160 | cell-matrix adhesion                              | GO_BiologicalProcess-EBI-UniProt-GOA-ACAP-ARAP_08.05.2020_00h00 | 2,11574E-08 | 4,70876E-07 | 7,38011E-11 | 1,4596E-09 | [4]                | Group190 | 10,00 | 24,00 |
| GO:0007162 | negative regulation of cell adhesion              | GO_BiologicalProcess-EBI-UniProt-GOA-ACAP-ARAP_08.05.2020_00h00 | 0,000116516 | 0,000701296 | 7,38011E-11 | 1,4596E-09 | [3, 4, 5]          | Group190 | 6,73  | 20,00 |
| GO:0045785 | positive regulation of cell adhesion              | GO_BiologicalProcess-EBI-UniProt-GOA-ACAP-ARAP_08.05.2020_00h00 | 2,56997E-05 | 0,000201595 | 7,38011E-11 | 1,4596E-09 | [3, 4, 5]          | Group190 | 6,18  | 28,00 |
| GO:0048872 | homeostasis of number of cells                    | GO_BiologicalProcess-EBI-UniProt-GOA-ACAP-ARAP_08.05.2020_00h00 | 0,00023294  | 0,001161058 | 7,38011E-11 | 1,4596E-09 | [4]                | Group190 | 6,57  | 19,00 |
| GO:0050866 | negative regulation of cell activation            | GO_BiologicalProcess-EBI-UniProt-GOA-ACAP-ARAP_08.05.2020_00h00 | 0,024882277 | 0,040497176 | 7,38011E-11 | 1,4596E-09 | [3, 4, 5]          | Group190 | 5,16  | 11,00 |
| GO:0002285 | lymphocyte activation involved in immune response | GO_BiologicalProcess-EBI-UniProt-GOA-ACAP-ARAP_08.05.2020_00h00 | 0,004762104 | 0,01147943  | 7,38011E-11 | 1,4596E-09 | [4, 5]             | Group190 | 6,25  | 12,00 |
| GO:0010810 | regulation of cell-substrate adhesion             | GO_BiologicalProcess-EBI-UniProt-GOA-ACAP-ARAP_08.05.2020_00h00 | 3,73914E-05 | 0,000273157 | 7,38011E-11 | 1,4596E-09 | [4, 5]             | Group190 | 7,83  | 18,00 |
| GO:0022407 | regulation of cell-cell adhesion                  | GO_BiologicalProcess-EBI-UniProt-GOA-ACAP-ARAP_08.05.2020_00h00 | 9,88883E-08 | 1,57727E-06 | 7,38011E-11 | 1,4596E-09 | [4, 5]             | Group190 | 7,37  | 33,00 |
| GO:0034101 | erythrocyte homeostasis                           | GO_BiologicalProcess-EBI-UniProt-GOA-ACAP-ARAP_08.05.2020_00h00 | 0,000242113 | 0,00120053  | 7,38011E-11 | 1,4596E-09 | [3, 6]             | Group190 | 8,82  | 12,00 |
| GO:0042110 | T cell activation                                 | GO_BiologicalProcess-EBI-UniProt-GOA-ACAP-ARAP_08.05.2020_00h00 | 0,002095667 | 0,006306772 | 7,38011E-11 | 1,4596E-09 | [4, 5]             | Group190 | 4,90  | 25,00 |
| GO:0048534 | hematopoietic or lymphoid organ development       | GO_BiologicalProcess-EBI-UniProt-GOA-ACAP-ARAP_08.05.2020_00h00 | 2,0816E-05  | 0,000167403 | 7,38011E-11 | 1,4596E-09 | [3, 4, 5, 6]       | Group190 | 4,88  | 49,00 |
| GO:0010811 | positive regulation of cell-substrate adhesion    | GO_BiologicalProcess-EBI-UniProt-GOA-ACAP-ARAP_08.05.2020_00h00 | 0,002776    | 0,007700383 | 7,38011E-11 | 1,4596E-09 | [4, 5, 6]          | Group190 | 7,46  | 10,00 |
| GO:0022408 | negative regulation of cell-cell adhesion         | GO_BiologicalProcess-EBI-UniProt-GOA-ACAP-ARAP_08.05.2020_00h00 | 0,000468324 | 0,001983124 | 7,38011E-11 | 1,4596E-09 | [4, 5, 6]          | Group190 | 7,41  | 14,00 |
| GO:0022409 | positive regulation of cell-cell adhesion         | GO_BiologicalProcess-EBI-UniProt-GOA-ACAP-ARAP_08.05.2020_00h00 | 0,000265458 | 0,001296139 | 7,38011E-11 | 1,4596E-09 | [4, 5, 6]          | Group190 | 6,51  | 19,00 |
| GO:0051249 | regulation of lymphocyte activation               | GO_BiologicalProcess-EBI-UniProt-GOA-ACAP-ARAP_08.05.2020_00h00 | 0,021119829 | 0,035836305 | 7,38011E-11 | 1,4596E-09 | [4, 5, 6]          | Group190 | 4,14  | 23,00 |
| GO:0030097 | hemopoiesis                                       | GO_BiologicalProcess-EBI-UniProt-GOA-ACAP-ARAP_08.05.2020_00h00 | 2,93906E-05 | 0,000225015 | 7,38011E-11 | 1,4596E-09 | [4, 5, 6, 7]       | Group190 | 4,89  | 47,00 |
| GO:0051250 | negative regulation of lymphocyte activation      | GO_BiologicalProcess-EBI-UniProt-GOA-ACAP-ARAP_08.05.2020_00h00 | 0,02252461  | 0,037685405 | 7,38011E-11 | 1,4596E-09 | [4, 5, 6, 7]       | Group190 | 5,73  | 9,00  |
| GO:1903037 | regulation of leukocyte cell-cell adhesion        | GO_BiologicalProcess-EBI-UniProt-GOA-ACAP-ARAP_08.05.2020_00h00 | 0,000205795 | 0,001042039 | 7,38011E-11 | 1,4596E-09 | [5, 6]             | Group190 | 6,29  | 21,00 |
| GO:1903706 | regulation of hemopoiesis                         | GO_BiologicalProcess-EBI-UniProt-GOA-ACAP-ARAP_08.05.2020_00h00 | 0,007959014 | 0,017271601 | 7,38011E-11 | 1,4596E-09 | [3, 4, 5, 6, 7, 8] | Group190 | 4,53  | 23,00 |
| GO:0002521 | leukocyte differentiation                         | GO_BiologicalProcess-EBI-UniProt-GOA-ACAP-ARAP_08.05.2020_00h00 | 0,00341803  | 0,008912955 | 7,38011E-11 | 1,4596E-09 | [4, 5, 6, 7, 8]    | Group190 | 4,66  | 26,00 |

|            |                                                                              |                                                                 |             |             |             |            |                                |          |       |        |
|------------|------------------------------------------------------------------------------|-----------------------------------------------------------------|-------------|-------------|-------------|------------|--------------------------------|----------|-------|--------|
| GO:0030099 | myeloid cell differentiation                                                 | GO_BiologicalProcess-EBI-UniProt-GOA-ACAP-ARAP_08.05.2020_00h00 | 6,2456E-06  | 5,97704E-05 | 7,38011E-11 | 1,4596E-09 | [4, 5, 6, 7, 8]                | Group190 | 6,55  | 29,00  |
| GO:0050863 | regulation of T cell activation                                              | GO_BiologicalProcess-EBI-UniProt-GOA-ACAP-ARAP_08.05.2020_00h00 | 0,011387548 | 0,022656724 | 7,38011E-11 | 1,4596E-09 | [5, 6, 7]                      | Group190 | 4,84  | 17,00  |
| GO:1903038 | negative regulation of leukocyte cell-cell adhesion                          | GO_BiologicalProcess-EBI-UniProt-GOA-ACAP-ARAP_08.05.2020_00h00 | 0,023751667 | 0,039055575 | 7,38011E-11 | 1,4596E-09 | [5, 6, 7]                      | Group190 | 6,02  | 8,00   |
| GO:1903039 | positive regulation of leukocyte cell-cell adhesion                          | GO_BiologicalProcess-EBI-UniProt-GOA-ACAP-ARAP_08.05.2020_00h00 | 0,005321251 | 0,012512132 | 7,38011E-11 | 1,4596E-09 | [5, 6, 7]                      | Group190 | 5,71  | 14,00  |
| GO:1903556 | negative regulation of tumor necrosis factor superfamily cytokine production | GO_BiologicalProcess-EBI-UniProt-GOA-ACAP-ARAP_08.05.2020_00h00 | 0,029100992 | 0,045283981 | 7,38011E-11 | 1,4596E-09 | [4, 5, 6, 7, 8]                | Group190 | 7,58  | 5,00   |
| GO:0030098 | lymphocyte differentiation                                                   | GO_BiologicalProcess-EBI-UniProt-GOA-ACAP-ARAP_08.05.2020_00h00 | 0,005579029 | 0,013022271 | 7,38011E-11 | 1,4596E-09 | [4, 5, 6, 7, 8, 9]             | Group190 | 5,00  | 19,00  |
| GO:0030218 | erythrocyte differentiation                                                  | GO_BiologicalProcess-EBI-UniProt-GOA-ACAP-ARAP_08.05.2020_00h00 | 0,001763233 | 0,005550702 | 7,38011E-11 | 1,4596E-09 | [4, 5, 6, 7, 8, 9]             | Group190 | 7,94  | 10,00  |
| GO:0045637 | regulation of myeloid cell differentiation                                   | GO_BiologicalProcess-EBI-UniProt-GOA-ACAP-ARAP_08.05.2020_00h00 | 0,023358641 | 0,038541757 | 7,38011E-11 | 1,4596E-09 | [4, 5, 6, 7, 8, 9]             | Group190 | 4,89  | 13,00  |
| GO:0061515 | myeloid cell development                                                     | GO_BiologicalProcess-EBI-UniProt-GOA-ACAP-ARAP_08.05.2020_00h00 | 0,000976749 | 0,003436575 | 7,38011E-11 | 1,4596E-09 | [4, 5, 6, 7, 8, 9]             | Group190 | 10,26 | 8,00   |
| GO:0002573 | myeloid leukocyte differentiation                                            | GO_BiologicalProcess-EBI-UniProt-GOA-ACAP-ARAP_08.05.2020_00h00 | 0,002206373 | 0,00653715  | 7,38011E-11 | 1,4596E-09 | [5, 6, 7, 8, 9]                | Group190 | 6,31  | 14,00  |
| GO:0030183 | B cell differentiation                                                       | GO_BiologicalProcess-EBI-UniProt-GOA-ACAP-ARAP_08.05.2020_00h00 | 0,029878801 | 0,04604511  | 7,38011E-11 | 1,4596E-09 | [5, 6, 7, 8, 9, 10]            | Group190 | 5,76  | 8,00   |
| GO:0030316 | osteoclast differentiation                                                   | GO_BiologicalProcess-EBI-UniProt-GOA-ACAP-ARAP_08.05.2020_00h00 | 0,02034726  | 0,034772012 | 7,38011E-11 | 1,4596E-09 | [6, 7, 8, 9, 10]               | Group190 | 6,67  | 7,00   |
| GO:0050860 | negative regulation of T cell receptor signaling pathway                     | GO_BiologicalProcess-EBI-UniProt-GOA-ACAP-ARAP_08.05.2020_00h00 | 0,00033793  | 0,001562316 | 7,38011E-11 | 1,4596E-09 | [4, 5, 6, 7, 8, 9, 10, 11, 12] | Group190 | 20,83 | 5,00   |
| GO:0044092 | negative regulation of molecular function                                    | GO_BiologicalProcess-EBI-UniProt-GOA-ACAP-ARAP_08.05.2020_00h00 | 0,001134739 | 0,003864575 | 8,69098E-11 | 1,547E-09  | [3]                            | Group188 | 4,07  | 51,00  |
| GO:0050790 | regulation of catalytic activity                                             | GO_BiologicalProcess-EBI-UniProt-GOA-ACAP-ARAP_08.05.2020_00h00 | 1,121E-08   | 3,06514E-07 | 8,69098E-11 | 1,547E-09  | [3]                            | Group188 | 4,41  | 112,00 |
| GO:0016773 | phosphotransferase activity, alcohol group as acceptor                       | GO_MolecularFunction-EBI-UniProt-GOA-ACAP-ARAP_08.05.2020_00h00 | 3,23306E-05 | 0,000239848 | 8,69098E-11 | 1,547E-09  | [4]                            | Group188 | 4,40  | 63,00  |
| GO:0019900 | kinase binding                                                               | GO_MolecularFunction-EBI-UniProt-GOA-ACAP-ARAP_08.05.2020_00h00 | 0,00272406  | 0,007600365 | 8,69098E-11 | 1,547E-09  | [4]                            | Group188 | 4,35  | 34,00  |
| GO:0030234 | enzyme regulator activity                                                    | GO_BiologicalProcess-EBI-UniProt-GOA-ACAP-ARAP_08.05.2020_00h00 | 0,000976118 | 0,003447031 | 8,69098E-11 | 1,547E-09  | [4]                            | Group188 | 4,17  | 48,00  |
| GO:0043086 | negative regulation of catalytic activity                                    | GO_BiologicalProcess-EBI-UniProt-GOA-ACAP-ARAP_08.05.2020_00h00 | 0,003219853 | 0,008512152 | 8,69098E-11 | 1,547E-09  | [4]                            | Group188 | 4,20  | 37,00  |
| GO:0051336 | regulation of hydrolase activity                                             | GO_BiologicalProcess-EBI-UniProt-GOA-ACAP-ARAP_08.05.2020_00h00 | 8,71715E-06 | 7,94506E-05 | 8,69098E-11 | 1,547E-09  | [4]                            | Group188 | 4,59  | 63,00  |
| GO:0051338 | regulation of transferase activity                                           | GO_BiologicalProcess-EBI-UniProt-GOA-ACAP-ARAP_08.05.2020_00h00 | 2,2116E-07  | 3,30703E-06 | 8,69098E-11 | 1,547E-09  | [4]                            | Group188 | 5,31  | 58,00  |
| GO:0051246 | regulation of protein metabolic process                                      | GO_BiologicalProcess-EBI-UniProt-GOA-ACAP-ARAP_08.05.2020_00h00 | 1,25694E-08 | 3,25106E-07 | 8,69098E-11 | 1,547E-09  | [4, 5]                         | Group188 | 4,21  | 127,00 |
| GO:0032268 | regulation of cellular protein metabolic process                             | GO_BiologicalProcess-EBI-UniProt-GOA-ACAP-ARAP_08.05.2020_00h00 | 6,44939E-09 | 2,1283E-07  | 8,69098E-11 | 1,547E-09  | [4, 5, 6]                      | Group188 | 4,32  | 122,00 |



|            |                                                                                  |                                                                 |             |             |             |           |                                |          |       |       |
|------------|----------------------------------------------------------------------------------|-----------------------------------------------------------------|-------------|-------------|-------------|-----------|--------------------------------|----------|-------|-------|
| GO:0051248 | negative regulation of protein metabolic process                                 | GO_BiologicalProcess-EBI-UniProt-GOA-ACAP-ARAP_08.05.2020_00h00 | 0,000265156 | 0,001301303 | 8,69098E-11 | 1,547E-09 | [4, 5, 6]                      | Group188 | 4,34  | 51,00 |
| GO:0051348 | negative regulation of transferase activity                                      | GO_BiologicalProcess-EBI-UniProt-GOA-ACAP-ARAP_08.05.2020_00h00 | 0,005998993 | 0,013800568 | 8,69098E-11 | 1,547E-09 | [5]                            | Group188 | 5,32  | 16,00 |
| GO:0019220 | regulation of phosphate metabolic process                                        | GO_BiologicalProcess-EBI-UniProt-GOA-ACAP-ARAP_08.05.2020_00h00 | 1,73471E-08 | 4,04906E-07 | 8,69098E-11 | 1,547E-09 | [5, 6]                         | Group188 | 4,71  | 91,00 |
| GO:0030162 | regulation of proteolysis                                                        | GO_BiologicalProcess-EBI-UniProt-GOA-ACAP-ARAP_08.05.2020_00h00 | 0,004999209 | 0,011901102 | 8,69098E-11 | 1,547E-09 | [5, 6]                         | Group188 | 4,21  | 33,00 |
| GO:0032269 | negative regulation of cellular protein metabolic process                        | GO_BiologicalProcess-EBI-UniProt-GOA-ACAP-ARAP_08.05.2020_00h00 | 0,00020134  | 0,001035927 | 8,69098E-11 | 1,547E-09 | [4, 5, 6, 7]                   | Group188 | 4,45  | 49,00 |
| GO:0031399 | regulation of protein modification process                                       | GO_BiologicalProcess-EBI-UniProt-GOA-ACAP-ARAP_08.05.2020_00h00 | 1,07623E-07 | 1,68845E-06 | 8,69098E-11 | 1,547E-09 | [5, 6, 7]                      | Group188 | 4,55  | 90,00 |
| GO:0045936 | negative regulation of phosphate metabolic process                               | GO_BiologicalProcess-EBI-UniProt-GOA-ACAP-ARAP_08.05.2020_00h00 | 0,000540563 | 0,002239477 | 8,69098E-11 | 1,547E-09 | [5, 6, 7]                      | Group188 | 5,02  | 30,00 |
| GO:0042325 | regulation of phosphorylation                                                    | GO_BiologicalProcess-EBI-UniProt-GOA-ACAP-ARAP_08.05.2020_00h00 | 6,23797E-08 | 1,10551E-06 | 8,69098E-11 | 1,547E-09 | [6, 7]                         | Group188 | 4,77  | 82,00 |
| GO:0045861 | negative regulation of proteolysis                                               | GO_BiologicalProcess-EBI-UniProt-GOA-ACAP-ARAP_08.05.2020_00h00 | 0,006054374 | 0,013861331 | 8,69098E-11 | 1,547E-09 | [5, 6, 7, 8]                   | Group188 | 4,96  | 19,00 |
| GO:0043549 | regulation of kinase activity                                                    | GO_BiologicalProcess-EBI-UniProt-GOA-ACAP-ARAP_08.05.2020_00h00 | 1,8027E-06  | 2,05379E-05 | 8,69098E-11 | 1,547E-09 | [5, 7, 8]                      | Group188 | 5,25  | 51,00 |
| GO:0001932 | regulation of protein phosphorylation                                            | GO_BiologicalProcess-EBI-UniProt-GOA-ACAP-ARAP_08.05.2020_00h00 | 1,20031E-07 | 1,85273E-06 | 8,69098E-11 | 1,547E-09 | [6, 7, 8]                      | Group188 | 4,86  | 75,00 |
| GO:0042326 | negative regulation of phosphorylation                                           | GO_BiologicalProcess-EBI-UniProt-GOA-ACAP-ARAP_08.05.2020_00h00 | 0,001627748 | 0,005192518 | 8,69098E-11 | 1,547E-09 | [6, 7, 8]                      | Group188 | 5,07  | 24,00 |
| GO:0001933 | negative regulation of protein phosphorylation                                   | GO_BiologicalProcess-EBI-UniProt-GOA-ACAP-ARAP_08.05.2020_00h00 | 0,004805825 | 0,011555714 | 8,69098E-11 | 1,547E-09 | [6, 7, 8, 9]                   | Group188 | 4,88  | 21,00 |
| GO:0004672 | protein kinase activity                                                          | GO_BiologicalProcess-EBI-UniProt-GOA-ACAP-ARAP_08.05.2020_00h00 | 4,63941E-05 | 0,000324081 | 8,69098E-11 | 1,547E-09 | [7, 8]                         | Group188 | 4,46  | 58,00 |
| GO:0004693 | cyclin-dependent protein serine/threonine kinase activity                        | GO_BiologicalProcess-EBI-UniProt-GOA-ACAP-ARAP_08.05.2020_00h00 | 0,000545112 | 0,002248586 | 8,69098E-11 | 1,547E-09 | [5, 6, 9, 10]                  | Group188 | 8,59  | 11,00 |
| GO:0045859 | regulation of protein kinase activity                                            | GO_BiologicalProcess-EBI-UniProt-GOA-ACAP-ARAP_08.05.2020_00h00 | 1,77981E-05 | 0,000148111 | 8,69098E-11 | 1,547E-09 | [6, 7, 8, 9]                   | Group188 | 5,12  | 44,00 |
| GO:0052548 | regulation of endopeptidase activity                                             | GO_BiologicalProcess-EBI-UniProt-GOA-ACAP-ARAP_08.05.2020_00h00 | 0,000937128 | 0,003333945 | 8,69098E-11 | 1,547E-09 | [6, 7, 8, 9]                   | Group188 | 5,29  | 24,00 |
| GO:2000134 | negative regulation of G1/S transition of mitotic cell cycle                     | GO_BiologicalProcess-EBI-UniProt-GOA-ACAP-ARAP_08.05.2020_00h00 | 0,022311579 | 0,037394363 | 8,69098E-11 | 1,547E-09 | [6, 7, 8, 9]                   | Group188 | 6,54  | 7,00  |
| GO:0000079 | regulation of cyclin-dependent protein serine/threonine kinase activity          | GO_BiologicalProcess-EBI-UniProt-GOA-ACAP-ARAP_08.05.2020_00h00 | 0,001520331 | 0,004948833 | 8,69098E-11 | 1,547E-09 | [5, 6, 7, 8, 9, 10, 11]        | Group188 | 8,74  | 9,00  |
| GO:0045736 | negative regulation of cyclin-dependent protein serine/threonine kinase activity | GO_BiologicalProcess-EBI-UniProt-GOA-ACAP-ARAP_08.05.2020_00h00 | 0,007393209 | 0,016265061 | 8,69098E-11 | 1,547E-09 | [4, 5, 6, 7, 8, 9, 10, 11, 12] | Group188 | 13,33 | 4,00  |
| GO:0006469 | negative regulation of protein kinase activity                                   | GO_BiologicalProcess-EBI-UniProt-GOA-ACAP-ARAP_08.05.2020_00h00 | 0,012703408 | 0,02460964  | 8,69098E-11 | 1,547E-09 | [7, 8, 9, 10]                  | Group188 | 5,31  | 13,00 |
| GO:0010951 | negative regulation of endopeptidase activity                                    | GO_BiologicalProcess-EBI-UniProt-GOA-ACAP-ARAP_08.05.2020_00h00 | 0,013479644 | 0,025748543 | 8,69098E-11 | 1,547E-09 | [7, 8, 9, 10]                  | Group188 | 5,11  | 14,00 |
| GO:0071900 | regulation of protein serine/threonine kinase activity                           | GO_BiologicalProcess-EBI-UniProt-GOA-ACAP-ARAP_08.05.2020_00h00 | 6,17963E-05 | 0,00041356  | 8,69098E-11 | 1,547E-09 | [7, 8, 9, 10]                  | Group188 | 5,61  | 31,00 |

|            |                                                              |                                                                 |             |             |             |            |                 |          |      |        |
|------------|--------------------------------------------------------------|-----------------------------------------------------------------|-------------|-------------|-------------|------------|-----------------|----------|------|--------|
| GO:0012501 | programmed cell death                                        | GO_BiologicalProcess-EBI-UniProt-GOA-ACAP-ARAP_08.05.2020_00h00 | 9,88592E-07 | 1,19757E-05 | 1,12394E-10 | 1,6672E-09 | [3]             | Group180 | 4,27 | 94,00  |
| GO:0048584 | positive regulation of response to stimulus                  | GO_BiologicalProcess-EBI-UniProt-GOA-ACAP-ARAP_08.05.2020_00h00 | 2,07976E-07 | 3,15925E-06 | 1,12394E-10 | 1,6672E-09 | [2, 3, 4]       | Group180 | 4,21 | 109,00 |
| GO:0051094 | positive regulation of developmental process                 | GO_BiologicalProcess-EBI-UniProt-GOA-ACAP-ARAP_08.05.2020_00h00 | 8,57256E-07 | 1,07947E-05 | 1,12394E-10 | 1,6672E-09 | [2, 3, 4]       | Group180 | 4,74 | 70,00  |
| GO:0010941 | regulation of cell death                                     | GO_BiologicalProcess-EBI-UniProt-GOA-ACAP-ARAP_08.05.2020_00h00 | 3,69996E-07 | 5,20716E-06 | 1,12394E-10 | 1,6672E-09 | [3, 4]          | Group180 | 4,57 | 82,00  |
| GO:0042127 | regulation of cell population proliferation                  | GO_BiologicalProcess-EBI-UniProt-GOA-ACAP-ARAP_08.05.2020_00h00 | 9,02399E-10 | 5,75731E-08 | 1,12394E-10 | 1,6672E-09 | [3, 4]          | Group180 | 5,05 | 89,00  |
| GO:0008284 | positive regulation of cell population proliferation         | GO_BiologicalProcess-EBI-UniProt-GOA-ACAP-ARAP_08.05.2020_00h00 | 8,18119E-08 | 1,37358E-06 | 1,12394E-10 | 1,6672E-09 | [3, 4, 5]       | Group180 | 5,61 | 55,00  |
| GO:0010942 | positive regulation of cell death                            | GO_BiologicalProcess-EBI-UniProt-GOA-ACAP-ARAP_08.05.2020_00h00 | 5,54439E-06 | 5,52706E-05 | 1,12394E-10 | 1,6672E-09 | [3, 4, 5]       | Group180 | 5,53 | 41,00  |
| GO:0045597 | positive regulation of cell differentiation                  | GO_BiologicalProcess-EBI-UniProt-GOA-ACAP-ARAP_08.05.2020_00h00 | 0,00015702  | 0,000878762 | 1,12394E-10 | 1,6672E-09 | [3, 4, 5]       | Group180 | 4,52 | 48,00  |
| GO:0060548 | negative regulation of cell death                            | GO_BiologicalProcess-EBI-UniProt-GOA-ACAP-ARAP_08.05.2020_00h00 | 6,67908E-06 | 6,3286E-05  | 1,12394E-10 | 1,6672E-09 | [3, 4, 5]       | Group180 | 4,93 | 53,00  |
| GO:0097190 | apoptotic signaling pathway                                  | GO_BiologicalProcess-EBI-UniProt-GOA-ACAP-ARAP_08.05.2020_00h00 | 1,38238E-06 | 1,63326E-05 | 1,12394E-10 | 1,6672E-09 | [3, 4, 5]       | Group180 | 6,00 | 39,00  |
| GO:0097191 | extrinsic apoptotic signaling pathway                        | GO_BiologicalProcess-EBI-UniProt-GOA-ACAP-ARAP_08.05.2020_00h00 | 0,000831256 | 0,00305966  | 1,12394E-10 | 1,6672E-09 | [4, 5, 6]       | Group180 | 6,48 | 16,00  |
| GO:0097193 | intrinsic apoptotic signaling pathway                        | GO_BiologicalProcess-EBI-UniProt-GOA-ACAP-ARAP_08.05.2020_00h00 | 0,000166499 | 0,000895165 | 1,12394E-10 | 1,6672E-09 | [4, 5, 6]       | Group180 | 6,56 | 20,00  |
| GO:0042981 | regulation of apoptotic process                              | GO_BiologicalProcess-EBI-UniProt-GOA-ACAP-ARAP_08.05.2020_00h00 | 1,11326E-06 | 1,33174E-05 | 1,12394E-10 | 1,6672E-09 | [5, 6]          | Group180 | 4,59 | 75,00  |
| GO:2001233 | regulation of apoptotic signaling pathway                    | GO_BiologicalProcess-EBI-UniProt-GOA-ACAP-ARAP_08.05.2020_00h00 | 0,003071183 | 0,008186971 | 1,12394E-10 | 1,6672E-09 | [4, 5, 6, 7]    | Group180 | 4,99 | 22,00  |
| GO:0043065 | positive regulation of apoptotic process                     | GO_BiologicalProcess-EBI-UniProt-GOA-ACAP-ARAP_08.05.2020_00h00 | 5,25908E-05 | 0,000362082 | 1,12394E-10 | 1,6672E-09 | [5, 6, 7]       | Group180 | 5,29 | 36,00  |
| GO:0043066 | negative regulation of apoptotic process                     | GO_BiologicalProcess-EBI-UniProt-GOA-ACAP-ARAP_08.05.2020_00h00 | 2,58132E-05 | 0,000200839 | 1,12394E-10 | 1,6672E-09 | [5, 6, 7]       | Group180 | 4,91 | 47,00  |
| GO:2001234 | negative regulation of apoptotic signaling pathway           | GO_BiologicalProcess-EBI-UniProt-GOA-ACAP-ARAP_08.05.2020_00h00 | 0,001539791 | 0,004978311 | 1,12394E-10 | 1,6672E-09 | [4, 5, 6, 7, 8] | Group180 | 6,11 | 16,00  |
| GO:2001236 | regulation of extrinsic apoptotic signaling pathway          | GO_BiologicalProcess-EBI-UniProt-GOA-ACAP-ARAP_08.05.2020_00h00 | 0,01962244  | 0,034081079 | 1,12394E-10 | 1,6672E-09 | [5, 6, 7, 8]    | Group180 | 5,59 | 10,00  |
| GO:2001242 | regulation of intrinsic apoptotic signaling pathway          | GO_BiologicalProcess-EBI-UniProt-GOA-ACAP-ARAP_08.05.2020_00h00 | 0,01703891  | 0,03036543  | 1,12394E-10 | 1,6672E-09 | [5, 6, 7, 8]    | Group180 | 5,71 | 10,00  |
| GO:2001237 | negative regulation of extrinsic apoptotic signaling pathway | GO_BiologicalProcess-EBI-UniProt-GOA-ACAP-ARAP_08.05.2020_00h00 | 0,012383579 | 0,024285011 | 1,12394E-10 | 1,6672E-09 | [5, 6, 7, 8, 9] | Group180 | 6,78 | 8,00   |
| GO:2001243 | negative regulation of intrinsic apoptotic signaling pathway | GO_BiologicalProcess-EBI-UniProt-GOA-ACAP-ARAP_08.05.2020_00h00 | 0,00920515  | 0,019361163 | 1,12394E-10 | 1,6672E-09 | [5, 6, 7, 8, 9] | Group180 | 7,14 | 8,00   |
| GO:0050673 | epithelial cell proliferation                                | GO_BiologicalProcess-EBI-UniProt-GOA-ACAP-ARAP_08.05.2020_00h00 | 3,83793E-06 | 3,94935E-05 | 1,07725E-10 | 1,7432E-09 | [3]             | Group163 | 6,71 | 29,00  |
| GO:0048729 | tissue morphogenesis                                         | GO_BiologicalProcess-EBI-UniProt-GOA-ACAP-ARAP_08.05.2020_00h00 | 7,67653E-05 | 0,000486519 | 1,07725E-10 | 1,7432E-09 | [3, 4]          | Group163 | 5,14 | 37,00  |

|            |                                                                  |                                                                 |             |             |             |            |                              |          |       |        |
|------------|------------------------------------------------------------------|-----------------------------------------------------------------|-------------|-------------|-------------|------------|------------------------------|----------|-------|--------|
| GO:0035239 | tube morphogenesis                                               | GO_BiologicalProcess-EBI-UniProt-GOA-ACAP-ARAP_08.05.2020_00h00 | 6,64249E-09 | 2,11896E-07 | 1,07725E-10 | 1,7432E-09 | [3, 4, 5]                    | Group163 | 6,04  | 55,00  |
| GO:0001655 | urogenital system development                                    | GO_BiologicalProcess-EBI-UniProt-GOA-ACAP-ARAP_08.05.2020_00h00 | 0,00374708  | 0,009486654 | 1,07725E-10 | 1,7432E-09 | [4, 5]                       | Group163 | 5,19  | 19,00  |
| GO:0002009 | morphogenesis of an epithelium                                   | GO_BiologicalProcess-EBI-UniProt-GOA-ACAP-ARAP_08.05.2020_00h00 | 0,000210357 | 0,001059536 | 1,07725E-10 | 1,7432E-09 | [4, 5]                       | Group163 | 5,24  | 31,00  |
| GO:0050679 | positive regulation of epithelial cell proliferation             | GO_BiologicalProcess-EBI-UniProt-GOA-ACAP-ARAP_08.05.2020_00h00 | 0,00018895  | 0,000982745 | 1,07725E-10 | 1,7432E-09 | [4, 5, 6]                    | Group163 | 7,41  | 16,00  |
| GO:0060562 | epithelial tube morphogenesis                                    | GO_BiologicalProcess-EBI-UniProt-GOA-ACAP-ARAP_08.05.2020_00h00 | 0,025199339 | 0,040805023 | 1,07725E-10 | 1,7432E-09 | [4, 5, 6]                    | Group163 | 4,51  | 16,00  |
| GO:0072001 | renal system development                                         | GO_BiologicalProcess-EBI-UniProt-GOA-ACAP-ARAP_08.05.2020_00h00 | 0,010179704 | 0,02081619  | 1,07725E-10 | 1,7432E-09 | [4, 5, 6]                    | Group163 | 5,02  | 16,00  |
| GO:0001822 | kidney development                                               | GO_BiologicalProcess-EBI-UniProt-GOA-ACAP-ARAP_08.05.2020_00h00 | 0,032703687 | 0,049209792 | 1,07725E-10 | 1,7432E-09 | [4, 5, 6, 7]                 | Group163 | 4,55  | 14,00  |
| GO:0072073 | kidney epithelium development                                    | GO_BiologicalProcess-EBI-UniProt-GOA-ACAP-ARAP_08.05.2020_00h00 | 0,008775524 | 0,018580036 | 1,07725E-10 | 1,7432E-09 | [5, 6, 7, 8]                 | Group163 | 6,33  | 10,00  |
| GO:0035850 | epithelial cell differentiation involved in kidney development   | GO_BiologicalProcess-EBI-UniProt-GOA-ACAP-ARAP_08.05.2020_00h00 | 0,002283362 | 0,006702997 | 1,07725E-10 | 1,7432E-09 | [5, 6, 7, 8, 9]              | Group163 | 11,54 | 6,00   |
| GO:0072015 | glomerular visceral epithelial cell development                  | GO_BiologicalProcess-EBI-UniProt-GOA-ACAP-ARAP_08.05.2020_00h00 | 0,005222608 | 0,012340829 | 1,07725E-10 | 1,7432E-09 | [6, 7, 8, 9, 10, 11, 12, 13] | Group163 | 21,43 | 3,00   |
| GO:0007166 | cell surface receptor signaling pathway                          | GO_BiologicalProcess-EBI-UniProt-GOA-ACAP-ARAP_08.05.2020_00h00 | 2,092E-08   | 4,76678E-07 | 1,63315E-10 | 1,938E-09  | [3, 4, 5]                    | Group171 | 4,08  | 137,00 |
| GO:0070848 | response to growth factor                                        | GO_BiologicalProcess-EBI-UniProt-GOA-ACAP-ARAP_08.05.2020_00h00 | 1,15067E-05 | 0,000101962 | 1,63315E-10 | 1,938E-09  | [4]                          | Group171 | 5,37  | 41,00  |
| GO:0090287 | regulation of cellular response to growth factor stimulus        | GO_BiologicalProcess-EBI-UniProt-GOA-ACAP-ARAP_08.05.2020_00h00 | 0,00110216  | 0,003767027 | 1,63315E-10 | 1,938E-09  | [3, 4, 6]                    | Group171 | 5,94  | 18,00  |
| GO:0009967 | positive regulation of signal transduction                       | GO_BiologicalProcess-EBI-UniProt-GOA-ACAP-ARAP_08.05.2020_00h00 | 4,99385E-09 | 1,91165E-07 | 1,63315E-10 | 1,938E-09  | [3, 4, 5, 6]                 | Group171 | 4,92  | 87,00  |
| GO:0007167 | enzyme linked receptor protein signaling pathway                 | GO_BiologicalProcess-EBI-UniProt-GOA-ACAP-ARAP_08.05.2020_00h00 | 3,81246E-06 | 3,96579E-05 | 1,63315E-10 | 1,938E-09  | [4, 5, 6]                    | Group171 | 4,96  | 55,00  |
| GO:0071363 | cellular response to growth factor stimulus                      | GO_BiologicalProcess-EBI-UniProt-GOA-ACAP-ARAP_08.05.2020_00h00 | 2,22323E-05 | 0,000175837 | 1,63315E-10 | 1,938E-09  | [5]                          | Group171 | 5,33  | 39,00  |
| GO:0007169 | transmembrane receptor protein tyrosine kinase signaling pathway | GO_BiologicalProcess-EBI-UniProt-GOA-ACAP-ARAP_08.05.2020_00h00 | 0,00012082  | 0,000718164 | 1,63315E-10 | 1,938E-09  | [5, 6, 7]                    | Group171 | 4,97  | 38,00  |
| GO:0045937 | positive regulation of phosphate metabolic process               | GO_BiologicalProcess-EBI-UniProt-GOA-ACAP-ARAP_08.05.2020_00h00 | 1,12601E-09 | 6,73495E-08 | 1,63315E-10 | 1,938E-09  | [5, 6, 7]                    | Group171 | 5,60  | 70,00  |
| GO:0031401 | positive regulation of protein modification process              | GO_BiologicalProcess-EBI-UniProt-GOA-ACAP-ARAP_08.05.2020_00h00 | 7,84556E-08 | 1,34075E-06 | 1,63315E-10 | 1,938E-09  | [5, 6, 7, 8]                 | Group171 | 5,11  | 68,00  |
| GO:0042325 | regulation of phosphorylation                                    | GO_BiologicalProcess-EBI-UniProt-GOA-ACAP-ARAP_08.05.2020_00h00 | 6,23797E-08 | 1,10551E-06 | 1,63315E-10 | 1,938E-09  | [6, 7]                       | Group171 | 4,77  | 82,00  |
| GO:0001932 | regulation of protein phosphorylation                            | GO_BiologicalProcess-EBI-UniProt-GOA-ACAP-ARAP_08.05.2020_00h00 | 1,20031E-07 | 1,85273E-06 | 1,63315E-10 | 1,938E-09  | [6, 7, 8]                    | Group171 | 4,86  | 75,00  |
| GO:0042327 | positive regulation of phosphorylation                           | GO_BiologicalProcess-EBI-UniProt-GOA-ACAP-ARAP_08.05.2020_00h00 | 3,4551E-08  | 6,74801E-07 | 1,63315E-10 | 1,938E-09  | [6, 7, 8]                    | Group171 | 5,40  | 63,00  |
| GO:0001934 | positive regulation of protein phosphorylation                   | GO_BiologicalProcess-EBI-UniProt-GOA-ACAP-ARAP_08.05.2020_00h00 | 4,44036E-07 | 6,07061E-06 | 1,63315E-10 | 1,938E-09  | [6, 7, 8, 9]                 | Group171 | 5,24  | 57,00  |

|            |                                                              |                                                                 |             |             |             |            |                         |          |      |        |
|------------|--------------------------------------------------------------|-----------------------------------------------------------------|-------------|-------------|-------------|------------|-------------------------|----------|------|--------|
| GO:0043408 | regulation of MAPK cascade                                   | GO_BiologicalProcess-EBI-UniProt-GOA-ACAP-ARAP_08.05.2020_00h00 | 3,12878E-06 | 3,36432E-05 | 1,63315E-10 | 1,938E-09  | [5, 6, 7, 8, 9, 10]     | Group171 | 5,54 | 43,00  |
| GO:0043410 | positive regulation of MAPK cascade                          | GO_BiologicalProcess-EBI-UniProt-GOA-ACAP-ARAP_08.05.2020_00h00 | 2,28998E-07 | 3,37156E-06 | 1,63315E-10 | 1,938E-09  | [5, 6, 7, 8, 9, 10, 11] | Group171 | 6,54 | 38,00  |
| GO:0051239 | regulation of multicellular organismal process               | GO_BiologicalProcess-EBI-UniProt-GOA-ACAP-ARAP_08.05.2020_00h00 | 8,97701E-09 | 2,60333E-07 | 1,42071E-10 | 1,9453E-09 | [2, 3]                  | Group127 | 4,10 | 140,00 |
| GO:0048585 | negative regulation of response to stimulus                  | GO_BiologicalProcess-EBI-UniProt-GOA-ACAP-ARAP_08.05.2020_00h00 | 1,4974E-08  | 3,67438E-07 | 1,42071E-10 | 1,9453E-09 | [2, 3, 4]               | Group127 | 4,85 | 85,00  |
| GO:0051093 | negative regulation of developmental process                 | GO_BiologicalProcess-EBI-UniProt-GOA-ACAP-ARAP_08.05.2020_00h00 | 0,002781123 | 0,007692298 | 1,42071E-10 | 1,9453E-09 | [2, 3, 4]               | Group127 | 4,07 | 43,00  |
| GO:0051241 | negative regulation of multicellular organismal process      | GO_BiologicalProcess-EBI-UniProt-GOA-ACAP-ARAP_08.05.2020_00h00 | 0,001074145 | 0,003697685 | 1,42071E-10 | 1,9453E-09 | [2, 3, 4]               | Group127 | 4,04 | 53,00  |
| GO:2000026 | regulation of multicellular organismal development           | GO_BiologicalProcess-EBI-UniProt-GOA-ACAP-ARAP_08.05.2020_00h00 | 3,43602E-09 | 1,42968E-07 | 1,42071E-10 | 1,9453E-09 | [3, 4]                  | Group127 | 4,64 | 103,00 |
| GO:0002521 | leukocyte differentiation                                    | GO_BiologicalProcess-EBI-UniProt-GOA-ACAP-ARAP_08.05.2020_00h00 | 0,00341803  | 0,008912955 | 1,42071E-10 | 1,9453E-09 | [4, 5, 6, 7, 8]         | Group127 | 4,66 | 26,00  |
| GO:0050793 | regulation of developmental process                          | GO_BiologicalProcess-EBI-UniProt-GOA-ACAP-ARAP_08.05.2020_00h00 | 1,13592E-09 | 6,39455E-08 | 1,53186E-10 | 1,9476E-09 | [2, 3]                  | Group126 | 4,42 | 124,00 |
| GO:0051093 | negative regulation of developmental process                 | GO_BiologicalProcess-EBI-UniProt-GOA-ACAP-ARAP_08.05.2020_00h00 | 0,002781123 | 0,007692298 | 1,53186E-10 | 1,9476E-09 | [2, 3, 4]               | Group126 | 4,07 | 43,00  |
| GO:0051241 | negative regulation of multicellular organismal process      | GO_BiologicalProcess-EBI-UniProt-GOA-ACAP-ARAP_08.05.2020_00h00 | 0,001074145 | 0,003697685 | 1,53186E-10 | 1,9476E-09 | [2, 3, 4]               | Group126 | 4,04 | 53,00  |
| GO:2000026 | regulation of multicellular organismal development           | GO_BiologicalProcess-EBI-UniProt-GOA-ACAP-ARAP_08.05.2020_00h00 | 3,43602E-09 | 1,42968E-07 | 1,53186E-10 | 1,9476E-09 | [3, 4]                  | Group126 | 4,64 | 103,00 |
| GO:0035239 | tube morphogenesis                                           | GO_BiologicalProcess-EBI-UniProt-GOA-ACAP-ARAP_08.05.2020_00h00 | 6,64249E-09 | 2,11896E-07 | 1,53186E-10 | 1,9476E-09 | [3, 4, 5]               | Group126 | 6,04 | 55,00  |
| GO:0048514 | blood vessel morphogenesis                                   | GO_BiologicalProcess-EBI-UniProt-GOA-ACAP-ARAP_08.05.2020_00h00 | 9,25827E-09 | 2,60593E-07 | 1,53186E-10 | 1,9476E-09 | [4, 5, 6, 7, 8, 9]      | Group126 | 6,76 | 44,00  |
| GO:0032879 | regulation of localization                                   | GO_BiologicalProcess-EBI-UniProt-GOA-ACAP-ARAP_08.05.2020_00h00 | 1,28192E-10 | 1,5335E-08  | 1,94136E-10 | 2,1598E-09 | [2, 3]                  | Group179 | 4,45 | 133,00 |
| GO:0140352 | export from cell                                             | GO_BiologicalProcess-EBI-UniProt-GOA-ACAP-ARAP_08.05.2020_00h00 | 9,53733E-05 | 0,000588853 | 1,94136E-10 | 2,1598E-09 | [2, 4]                  | Group179 | 4,10 | 71,00  |
| GO:0032880 | regulation of protein localization                           | GO_BiologicalProcess-EBI-UniProt-GOA-ACAP-ARAP_08.05.2020_00h00 | 0,001417178 | 0,004660617 | 1,94136E-10 | 2,1598E-09 | [3, 4]                  | Group179 | 4,12 | 47,00  |
| GO:0051049 | regulation of transport                                      | GO_BiologicalProcess-EBI-UniProt-GOA-ACAP-ARAP_08.05.2020_00h00 | 6,30185E-05 | 0,00041881  | 1,94136E-10 | 2,1598E-09 | [3, 4]                  | Group179 | 4,00 | 81,00  |
| GO:0051050 | positive regulation of transport                             | GO_BiologicalProcess-EBI-UniProt-GOA-ACAP-ARAP_08.05.2020_00h00 | 0,001033711 | 0,003597314 | 1,94136E-10 | 2,1598E-09 | [2, 3, 4, 5]            | Group179 | 4,20 | 46,00  |
| GO:0060341 | regulation of cellular localization                          | GO_BiologicalProcess-EBI-UniProt-GOA-ACAP-ARAP_08.05.2020_00h00 | 0,000142641 | 0,000812543 | 1,94136E-10 | 2,1598E-09 | [3, 4]                  | Group179 | 4,51 | 49,00  |
| GO:0034762 | regulation of transmembrane transport                        | GO_BiologicalProcess-EBI-UniProt-GOA-ACAP-ARAP_08.05.2020_00h00 | 0,009670558 | 0,020031869 | 1,94136E-10 | 2,1598E-09 | [3, 4, 5]               | Group179 | 4,29 | 26,00  |
| GO:1904951 | positive regulation of establishment of protein localization | GO_BiologicalProcess-EBI-UniProt-GOA-ACAP-ARAP_08.05.2020_00h00 | 0,032269876 | 0,048864357 | 1,94136E-10 | 2,1598E-09 | [2, 3, 4, 5, 6]         | Group179 | 4,05 | 21,00  |
| GO:0043269 | regulation of ion transport                                  | GO_BiologicalProcess-EBI-UniProt-GOA-ACAP-ARAP_08.05.2020_00h00 | 0,013630096 | 0,025880955 | 1,94136E-10 | 2,1598E-09 | [4, 5]                  | Group179 | 4,02 | 30,00  |

|            |                                                                      |                                                                 |             |             |             |            |                       |          |      |        |
|------------|----------------------------------------------------------------------|-----------------------------------------------------------------|-------------|-------------|-------------|------------|-----------------------|----------|------|--------|
| GO:0043270 | positive regulation of ion transport                                 | GO_BiologicalProcess-EBI-UniProt-GOA-ACAP-ARAP_08.05.2020_00h00 | 0,029049521 | 0,045351375 | 1,94136E-10 | 2,1598E-09 | [3, 4, 5, 6]          | Group179 | 4,62 | 14,00  |
| GO:0070201 | regulation of establishment of protein localization                  | GO_BiologicalProcess-EBI-UniProt-GOA-ACAP-ARAP_08.05.2020_00h00 | 0,004486383 | 0,01086954  | 1,94136E-10 | 2,1598E-09 | [4, 5]                | Group179 | 4,18 | 35,00  |
| GO:1903827 | regulation of cellular protein localization                          | GO_BiologicalProcess-EBI-UniProt-GOA-ACAP-ARAP_08.05.2020_00h00 | 0,014565298 | 0,026805751 | 1,94136E-10 | 2,1598E-09 | [4, 5]                | Group179 | 4,19 | 25,00  |
| GO:1903829 | positive regulation of cellular protein localization                 | GO_BiologicalProcess-EBI-UniProt-GOA-ACAP-ARAP_08.05.2020_00h00 | 0,025775954 | 0,04145813  | 1,94136E-10 | 2,1598E-09 | [3, 4, 5, 6]          | Group179 | 4,49 | 16,00  |
| GO:0072657 | protein localization to membrane                                     | GO_BiologicalProcess-EBI-UniProt-GOA-ACAP-ARAP_08.05.2020_00h00 | 0,00820952  | 0,017734786 | 1,94136E-10 | 2,1598E-09 | [5]                   | Group179 | 4,22 | 29,00  |
| GO:0090087 | regulation of peptide transport                                      | GO_BiologicalProcess-EBI-UniProt-GOA-ACAP-ARAP_08.05.2020_00h00 | 0,009193194 | 0,019378606 | 1,94136E-10 | 2,1598E-09 | [4, 5, 6, 7]          | Group179 | 4,01 | 34,00  |
| GO:0009306 | protein secretion                                                    | GO_BiologicalProcess-EBI-UniProt-GOA-ACAP-ARAP_08.05.2020_00h00 | 0,017033646 | 0,030412685 | 1,94136E-10 | 2,1598E-09 | [4, 5, 6, 7, 8]       | Group179 | 4,05 | 27,00  |
| GO:0050663 | cytokine secretion                                                   | GO_BiologicalProcess-EBI-UniProt-GOA-ACAP-ARAP_08.05.2020_00h00 | 0,028077139 | 0,044266593 | 1,94136E-10 | 2,1598E-09 | [3, 4, 5, 6, 7, 8, 9] | Group179 | 4,76 | 13,00  |
| GO:0072659 | protein localization to plasma membrane                              | GO_BiologicalProcess-EBI-UniProt-GOA-ACAP-ARAP_08.05.2020_00h00 | 0,010597887 | 0,021351954 | 1,94136E-10 | 2,1598E-09 | [6]                   | Group179 | 5,12 | 15,00  |
| GO:1903747 | regulation of establishment of protein localization to mitochondrion | GO_BiologicalProcess-EBI-UniProt-GOA-ACAP-ARAP_08.05.2020_00h00 | 0,016363574 | 0,029491413 | 1,94136E-10 | 2,1598E-09 | [5, 6, 7, 8]          | Group179 | 7,69 | 6,00   |
| GO:0070838 | divalent metal ion transport                                         | GO_BiologicalProcess-EBI-UniProt-GOA-ACAP-ARAP_08.05.2020_00h00 | 0,001574539 | 0,005056488 | 1,94136E-10 | 2,1598E-09 | [7]                   | Group179 | 4,93 | 26,00  |
| GO:0060402 | calcium ion transport into cytosol                                   | GO_BiologicalProcess-EBI-UniProt-GOA-ACAP-ARAP_08.05.2020_00h00 | 0,000377397 | 0,001703626 | 1,94136E-10 | 2,1598E-09 | [4, 10, 12]           | Group179 | 7,57 | 14,00  |
| GO:0030198 | extracellular matrix organization                                    | GO_BiologicalProcess-EBI-UniProt-GOA-ACAP-ARAP_08.05.2020_00h00 | 4,35711E-10 | 3,4748E-08  | 4,35711E-10 | 4,5622E-09 | [5]                   | Group042 | 8,77 | 35,00  |
| GO:0009653 | anatomical structure morphogenesis                                   | GO_BiologicalProcess-EBI-UniProt-GOA-ACAP-ARAP_08.05.2020_00h00 | 9,29458E-11 | 1,48249E-08 | 4,8189E-10  | 4,7654E-09 | [2, 3]                | Group184 | 4,51 | 130,00 |
| GO:0009888 | tissue development                                                   | GO_BiologicalProcess-EBI-UniProt-GOA-ACAP-ARAP_08.05.2020_00h00 | 5,58784E-08 | 1,00898E-06 | 4,8189E-10  | 4,7654E-09 | [3]                   | Group184 | 4,48 | 98,00  |
| GO:0048646 | anatomical structure formation involved in morphogenesis             | GO_BiologicalProcess-EBI-UniProt-GOA-ACAP-ARAP_08.05.2020_00h00 | 2,69379E-08 | 5,60425E-07 | 4,8189E-10  | 4,7654E-09 | [2, 3, 4]             | Group184 | 5,40 | 64,00  |
| GO:0051093 | negative regulation of developmental process                         | GO_BiologicalProcess-EBI-UniProt-GOA-ACAP-ARAP_08.05.2020_00h00 | 0,002781123 | 0,007692298 | 4,8189E-10  | 4,7654E-09 | [2, 3, 4]             | Group184 | 4,07 | 43,00  |
| GO:0009790 | embryo development                                                   | GO_BiologicalProcess-EBI-UniProt-GOA-ACAP-ARAP_08.05.2020_00h00 | 0,000211308 | 0,001058752 | 4,8189E-10  | 4,7654E-09 | [3, 4]                | Group184 | 4,41 | 50,00  |
| GO:0022603 | regulation of anatomical structure morphogenesis                     | GO_BiologicalProcess-EBI-UniProt-GOA-ACAP-ARAP_08.05.2020_00h00 | 5,07994E-07 | 6,84718E-06 | 4,8189E-10  | 4,7654E-09 | [3, 4]                | Group184 | 5,11 | 60,00  |
| GO:0035295 | tube development                                                     | GO_BiologicalProcess-EBI-UniProt-GOA-ACAP-ARAP_08.05.2020_00h00 | 2,65621E-08 | 5,64888E-07 | 4,8189E-10  | 4,7654E-09 | [3, 4]                | Group184 | 5,48 | 62,00  |
| GO:0048729 | tissue morphogenesis                                                 | GO_BiologicalProcess-EBI-UniProt-GOA-ACAP-ARAP_08.05.2020_00h00 | 7,67653E-05 | 0,000486519 | 4,8189E-10  | 4,7654E-09 | [3, 4]                | Group184 | 5,14 | 37,00  |
| GO:2000026 | regulation of multicellular organismal development                   | GO_BiologicalProcess-EBI-UniProt-GOA-ACAP-ARAP_08.05.2020_00h00 | 3,43602E-09 | 1,42968E-07 | 4,8189E-10  | 4,7654E-09 | [3, 4]                | Group184 | 4,64 | 103,00 |
| GO:0035239 | tube morphogenesis                                                   | GO_BiologicalProcess-EBI-UniProt-GOA-ACAP-ARAP_08.05.2020_00h00 | 6,64249E-09 | 2,11896E-07 | 4,8189E-10  | 4,7654E-09 | [3, 4, 5]             | Group184 | 6,04 | 55,00  |

|            |                                           |                                                                 |             |             |             |            |                            |          |      |        |
|------------|-------------------------------------------|-----------------------------------------------------------------|-------------|-------------|-------------|------------|----------------------------|----------|------|--------|
| GO:0048598 | embryonic morphogenesis                   | GO_BiologicalProcess-EBI-UniProt-GOA-ACAP-ARAP_08.05.2020_00h00 | 0,000934627 | 0,003362548 | 4,8189E-10  | 4,7654E-09 | [3, 4, 5]                  | Group184 | 4,79 | 31,00  |
| GO:0060429 | epithelium development                    | GO_BiologicalProcess-EBI-UniProt-GOA-ACAP-ARAP_08.05.2020_00h00 | 5,08926E-06 | 5,18131E-05 | 4,8189E-10  | 4,7654E-09 | [4]                        | Group184 | 4,64 | 64,00  |
| GO:0002009 | morphogenesis of an epithelium            | GO_BiologicalProcess-EBI-UniProt-GOA-ACAP-ARAP_08.05.2020_00h00 | 0,000210357 | 0,001059536 | 4,8189E-10  | 4,7654E-09 | [4, 5]                     | Group184 | 5,24 | 31,00  |
| GO:0009887 | animal organ morphogenesis                | GO_BiologicalProcess-EBI-UniProt-GOA-ACAP-ARAP_08.05.2020_00h00 | 0,000679847 | 0,002644772 | 4,8189E-10  | 4,7654E-09 | [3, 4, 5, 6]               | Group184 | 4,21 | 49,00  |
| GO:0030855 | epithelial cell differentiation           | GO_BiologicalProcess-EBI-UniProt-GOA-ACAP-ARAP_08.05.2020_00h00 | 0,00043345  | 0,001885508 | 4,8189E-10  | 4,7654E-09 | [4, 5]                     | Group184 | 4,66 | 38,00  |
| GO:0072359 | circulatory system development            | GO_BiologicalProcess-EBI-UniProt-GOA-ACAP-ARAP_08.05.2020_00h00 | 3,81703E-07 | 5,29405E-06 | 4,8189E-10  | 4,7654E-09 | [4, 5]                     | Group184 | 5,15 | 60,00  |
| GO:0001704 | formation of primary germ layer           | GO_BiologicalProcess-EBI-UniProt-GOA-ACAP-ARAP_08.05.2020_00h00 | 0,008327947 | 0,017869608 | 4,8189E-10  | 4,7654E-09 | [3, 4, 5, 6, 7]            | Group184 | 6,77 | 9,00   |
| GO:0002064 | epithelial cell development               | GO_BiologicalProcess-EBI-UniProt-GOA-ACAP-ARAP_08.05.2020_00h00 | 3,30027E-06 | 3,50928E-05 | 4,8189E-10  | 4,7654E-09 | [4, 5, 6]                  | Group184 | 8,62 | 20,00  |
| GO:0007369 | gastrulation                              | GO_BiologicalProcess-EBI-UniProt-GOA-ACAP-ARAP_08.05.2020_00h00 | 0,00706902  | 0,015696175 | 4,8189E-10  | 4,7654E-09 | [4, 5, 6]                  | Group184 | 5,94 | 12,00  |
| GO:0060562 | epithelial tube morphogenesis             | GO_BiologicalProcess-EBI-UniProt-GOA-ACAP-ARAP_08.05.2020_00h00 | 0,025199339 | 0,040805023 | 4,8189E-10  | 4,7654E-09 | [4, 5, 6]                  | Group184 | 4,51 | 16,00  |
| GO:0001944 | vasculature development                   | GO_BiologicalProcess-EBI-UniProt-GOA-ACAP-ARAP_08.05.2020_00h00 | 3,67366E-09 | 1,46487E-07 | 4,8189E-10  | 4,7654E-09 | [4, 5, 6, 7]               | Group184 | 6,47 | 50,00  |
| GO:0001568 | blood vessel development                  | GO_BiologicalProcess-EBI-UniProt-GOA-ACAP-ARAP_08.05.2020_00h00 | 7,05492E-09 | 2,10986E-07 | 4,8189E-10  | 4,7654E-09 | [3, 5, 6, 7, 8]            | Group184 | 6,49 | 48,00  |
| GO:1901342 | regulation of vasculature development     | GO_BiologicalProcess-EBI-UniProt-GOA-ACAP-ARAP_08.05.2020_00h00 | 1,26962E-05 | 0,00011147  | 4,8189E-10  | 4,7654E-09 | [4, 5, 6, 7, 8]            | Group184 | 6,85 | 25,00  |
| GO:0001525 | angiogenesis                              | GO_BiologicalProcess-EBI-UniProt-GOA-ACAP-ARAP_08.05.2020_00h00 | 5,95789E-09 | 2,11174E-07 | 4,8189E-10  | 4,7654E-09 | [3, 4, 5, 6, 7, 8, 9, 10]  | Group184 | 7,27 | 40,00  |
| GO:0048514 | blood vessel morphogenesis                | GO_BiologicalProcess-EBI-UniProt-GOA-ACAP-ARAP_08.05.2020_00h00 | 9,25827E-09 | 2,60593E-07 | 4,8189E-10  | 4,7654E-09 | [4, 5, 6, 7, 8, 9]         | Group184 | 6,76 | 44,00  |
| GO:0045765 | regulation of angiogenesis                | GO_BiologicalProcess-EBI-UniProt-GOA-ACAP-ARAP_08.05.2020_00h00 | 5,97633E-05 | 0,000405628 | 4,8189E-10  | 4,7654E-09 | [4, 5, 6, 7, 8, 9, 10, 11] | Group184 | 6,69 | 22,00  |
| GO:0044092 | negative regulation of molecular function | GO_BiologicalProcess-EBI-UniProt-GOA-ACAP-ARAP_08.05.2020_00h00 | 0,001134739 | 0,003864575 | 6,09514E-10 | 5,7102E-09 | [3]                        | Group177 | 4,07 | 51,00  |
| GO:0044093 | positive regulation of molecular function | GO_BiologicalProcess-EBI-UniProt-GOA-ACAP-ARAP_08.05.2020_00h00 | 6,68997E-11 | 1,28046E-08 | 6,09514E-10 | 5,7102E-09 | [3]                        | Group177 | 5,07 | 99,00  |
| GO:0050790 | regulation of catalytic activity          | GO_BiologicalProcess-EBI-UniProt-GOA-ACAP-ARAP_08.05.2020_00h00 | 1,121E-08   | 3,06514E-07 | 6,09514E-10 | 5,7102E-09 | [3]                        | Group177 | 4,41 | 112,00 |
| GO:0030234 | enzyme regulator activity                 | GO_BiologicalProcess-EBI-UniProt-GOA-ACAP-ARAP_08.05.2020_00h00 | 0,000976118 | 0,003447031 | 6,09514E-10 | 5,7102E-09 | [4]                        | Group177 | 4,17 | 48,00  |
| GO:0043085 | positive regulation of catalytic activity | GO_BiologicalProcess-EBI-UniProt-GOA-ACAP-ARAP_08.05.2020_00h00 | 1,27347E-09 | 6,09358E-08 | 6,09514E-10 | 5,7102E-09 | [4]                        | Group177 | 5,20 | 82,00  |
| GO:0043086 | negative regulation of catalytic activity | GO_BiologicalProcess-EBI-UniProt-GOA-ACAP-ARAP_08.05.2020_00h00 | 0,003219853 | 0,008512152 | 6,09514E-10 | 5,7102E-09 | [4]                        | Group177 | 4,20 | 37,00  |
| GO:0051020 | GTPase binding                            | GO_MolecularFunction-EBI-UniProt-GOA-ACAP-ARAP_08.05.2020_00h00 | 0,012022416 | 0,023673771 | 6,09514E-10 | 5,7102E-09 | [4]                        | Group177 | 4,26 | 25,00  |
| GO:0051336 | regulation of hydrolase activity          | GO_BiologicalProcess-EBI-UniProt-GOA-ACAP-ARAP_08.05.2020_00h00 | 8,71715E-06 | 7,94506E-05 | 6,09514E-10 | 5,7102E-09 | [4]                        | Group177 | 4,59 | 63,00  |

|            |                                                                                           |                                                                 |             |             |             |            |                          |          |      |        |
|------------|-------------------------------------------------------------------------------------------|-----------------------------------------------------------------|-------------|-------------|-------------|------------|--------------------------|----------|------|--------|
| GO:0007264 | small GTPase mediated signal transduction                                                 | GO_BiologicalProcess-EBI-UniProt-GOA-ACAP-ARAP_08.05.2020_00h00 | 0,002490827 | 0,007158323 | 6,09514E-10 | 5,7102E-09 | [4, 5, 6]                | Group177 | 4,65 | 28,00  |
| GO:0008047 | enzyme activator activity                                                                 | GO_BiologicalProcess-EBI-UniProt-GOA-ACAP-ARAP_08.05.2020_00h00 | 0,000987177 | 0,003460544 | 6,09514E-10 | 5,7102E-09 | [5]                      | Group177 | 4,96 | 28,00  |
| GO:0043087 | regulation of GTPase activity                                                             | GO_BiologicalProcess-EBI-UniProt-GOA-ACAP-ARAP_08.05.2020_00h00 | 0,000172834 | 0,000924034 | 6,09514E-10 | 5,7102E-09 | [5]                      | Group177 | 5,53 | 28,00  |
| GO:0051345 | positive regulation of hydrolase activity                                                 | GO_BiologicalProcess-EBI-UniProt-GOA-ACAP-ARAP_08.05.2020_00h00 | 9,69574E-06 | 8,7536E-05  | 6,09514E-10 | 5,7102E-09 | [5]                      | Group177 | 5,30 | 43,00  |
| GO:0060589 | nucleoside-triphosphatase regulator activity                                              | GO_BiologicalProcess-EBI-UniProt-GOA-ACAP-ARAP_08.05.2020_00h00 | 0,003531843 | 0,009110441 | 6,09514E-10 | 5,7102E-09 | [5]                      | Group177 | 5,22 | 19,00  |
| GO:0030162 | regulation of proteolysis                                                                 | GO_BiologicalProcess-EBI-UniProt-GOA-ACAP-ARAP_08.05.2020_00h00 | 0,004999209 | 0,011901102 | 6,09514E-10 | 5,7102E-09 | [5, 6]                   | Group177 | 4,21 | 33,00  |
| GO:0043547 | positive regulation of GTPase activity                                                    | GO_BiologicalProcess-EBI-UniProt-GOA-ACAP-ARAP_08.05.2020_00h00 | 0,000437988 | 0,001896626 | 6,09514E-10 | 5,7102E-09 | [6]                      | Group177 | 5,58 | 24,00  |
| GO:0005096 | GTPase activator activity                                                                 | GO_BiologicalProcess-EBI-UniProt-GOA-ACAP-ARAP_08.05.2020_00h00 | 0,004219768 | 0,010354661 | 6,09514E-10 | 5,7102E-09 | [6, 7]                   | Group177 | 5,52 | 16,00  |
| GO:0045862 | positive regulation of proteolysis                                                        | GO_BiologicalProcess-EBI-UniProt-GOA-ACAP-ARAP_08.05.2020_00h00 | 0,023925476 | 0,039273895 | 6,09514E-10 | 5,7102E-09 | [5, 6, 7, 8]             | Group177 | 4,45 | 17,00  |
| GO:0010952 | positive regulation of peptidase activity                                                 | GO_BiologicalProcess-EBI-UniProt-GOA-ACAP-ARAP_08.05.2020_00h00 | 0,000395714 | 0,001777926 | 6,09514E-10 | 5,7102E-09 | [6, 7, 8, 9]             | Group177 | 7,21 | 15,00  |
| GO:0052548 | regulation of endopeptidase activity                                                      | GO_BiologicalProcess-EBI-UniProt-GOA-ACAP-ARAP_08.05.2020_00h00 | 0,000937128 | 0,003333945 | 6,09514E-10 | 5,7102E-09 | [6, 7, 8, 9]             | Group177 | 5,29 | 24,00  |
| GO:0043280 | positive regulation of cysteine-type endopeptidase activity involved in apoptotic process | GO_BiologicalProcess-EBI-UniProt-GOA-ACAP-ARAP_08.05.2020_00h00 | 0,000360827 | 0,001652209 | 6,09514E-10 | 5,7102E-09 | [6, 7, 8, 9, 10, 11, 12] | Group177 | 8,45 | 12,00  |
| GO:0023051 | regulation of signaling                                                                   | GO_BiologicalProcess-EBI-UniProt-GOA-ACAP-ARAP_08.05.2020_00h00 | 4,33256E-10 | 3,76933E-08 | 6,94518E-10 | 6,1812E-09 | [2, 3]                   | Group154 | 4,12 | 158,00 |
| GO:0010033 | response to organic substance                                                             | GO_BiologicalProcess-EBI-UniProt-GOA-ACAP-ARAP_08.05.2020_00h00 | 4,09467E-08 | 7,68353E-07 | 6,94518E-10 | 6,1812E-09 | [3]                      | Group154 | 4,00 | 141,00 |
| GO:0010646 | regulation of cell communication                                                          | GO_BiologicalProcess-EBI-UniProt-GOA-ACAP-ARAP_08.05.2020_00h00 | 3,57848E-10 | 3,4246E-08  | 6,94518E-10 | 6,1812E-09 | [3, 4]                   | Group154 | 4,14 | 157,00 |
| GO:0007166 | cell surface receptor signaling pathway                                                   | GO_BiologicalProcess-EBI-UniProt-GOA-ACAP-ARAP_08.05.2020_00h00 | 2,092E-08   | 4,76678E-07 | 6,94518E-10 | 6,1812E-09 | [3, 4, 5]                | Group154 | 4,08 | 137,00 |
| GO:0034097 | response to cytokine                                                                      | GO_BiologicalProcess-EBI-UniProt-GOA-ACAP-ARAP_08.05.2020_00h00 | 2,97291E-07 | 4,31072E-06 | 6,94518E-10 | 6,1812E-09 | [4]                      | Group154 | 5,05 | 64,00  |
| GO:0071310 | cellular response to organic substance                                                    | GO_BiologicalProcess-EBI-UniProt-GOA-ACAP-ARAP_08.05.2020_00h00 | 3,0656E-08  | 6,24208E-07 | 6,94518E-10 | 6,1812E-09 | [4]                      | Group154 | 4,21 | 122,00 |
| GO:0019221 | cytokine-mediated signaling pathway                                                       | GO_BiologicalProcess-EBI-UniProt-GOA-ACAP-ARAP_08.05.2020_00h00 | 0,000164126 | 0,000887395 | 6,94518E-10 | 6,1812E-09 | [4, 5, 6]                | Group154 | 4,81 | 40,00  |
| GO:0070555 | response to interleukin-1                                                                 | GO_BiologicalProcess-EBI-UniProt-GOA-ACAP-ARAP_08.05.2020_00h00 | 1,33456E-05 | 0,000114034 | 6,94518E-10 | 6,1812E-09 | [5]                      | Group154 | 8,45 | 18,00  |
| GO:0071345 | cellular response to cytokine stimulus                                                    | GO_BiologicalProcess-EBI-UniProt-GOA-ACAP-ARAP_08.05.2020_00h00 | 2,34572E-06 | 2,55097E-05 | 6,94518E-10 | 6,1812E-09 | [5]                      | Group154 | 4,94 | 58,00  |
| GO:0071363 | cellular response to growth factor stimulus                                               | GO_BiologicalProcess-EBI-UniProt-GOA-ACAP-ARAP_08.05.2020_00h00 | 2,22323E-05 | 0,000175837 | 6,94518E-10 | 6,1812E-09 | [5]                      | Group154 | 5,33 | 39,00  |
| GO:0048870 | cell motility                                                                             | GO_BiologicalProcess-EBI-UniProt-GOA-ACAP-ARAP_08.05.2020_00h00 | 1,18486E-09 | 6,29948E-08 | 7,52287E-10 | 6,3765E-09 | [2, 3]                   | Group175 | 5,00 | 90,00  |

|            |                                                          |                                                                 |             |             |             |            |                                |          |       |       |
|------------|----------------------------------------------------------|-----------------------------------------------------------------|-------------|-------------|-------------|------------|--------------------------------|----------|-------|-------|
| GO:0031589 | cell-substrate adhesion                                  | GO_BiologicalProcess-EBI-UniProt-GOA-ACAP-ARAP_08.05.2020_00h00 | 3,26496E-10 | 3,47175E-08 | 7,52287E-10 | 6,3765E-09 | [3]                            | Group175 | 9,07  | 34,00 |
| GO:0030155 | regulation of cell adhesion                              | GO_BiologicalProcess-EBI-UniProt-GOA-ACAP-ARAP_08.05.2020_00h00 | 1,32928E-08 | 3,34768E-07 | 7,52287E-10 | 6,3765E-09 | [3, 4]                         | Group175 | 6,36  | 48,00 |
| GO:0007160 | cell-matrix adhesion                                     | GO_BiologicalProcess-EBI-UniProt-GOA-ACAP-ARAP_08.05.2020_00h00 | 2,11574E-08 | 4,70876E-07 | 7,52287E-10 | 6,3765E-09 | [4]                            | Group175 | 10,00 | 24,00 |
| GO:0034330 | cell junction organization                               | GO_BiologicalProcess-EBI-UniProt-GOA-ACAP-ARAP_08.05.2020_00h00 | 6,16658E-05 | 0,000415593 | 7,52287E-10 | 6,3765E-09 | [4]                            | Group175 | 5,08  | 39,00 |
| GO:0045785 | positive regulation of cell adhesion                     | GO_BiologicalProcess-EBI-UniProt-GOA-ACAP-ARAP_08.05.2020_00h00 | 2,56997E-05 | 0,000201595 | 7,52287E-10 | 6,3765E-09 | [3, 4, 5]                      | Group175 | 6,18  | 28,00 |
| GO:0010810 | regulation of cell-substrate adhesion                    | GO_BiologicalProcess-EBI-UniProt-GOA-ACAP-ARAP_08.05.2020_00h00 | 3,73914E-05 | 0,000273157 | 7,52287E-10 | 6,3765E-09 | [4, 5]                         | Group175 | 7,83  | 18,00 |
| GO:0010811 | positive regulation of cell-substrate adhesion           | GO_BiologicalProcess-EBI-UniProt-GOA-ACAP-ARAP_08.05.2020_00h00 | 0,002776    | 0,007700383 | 7,52287E-10 | 6,3765E-09 | [4, 5, 6]                      | Group175 | 7,46  | 10,00 |
| GO:0010812 | negative regulation of cell-substrate adhesion           | GO_BiologicalProcess-EBI-UniProt-GOA-ACAP-ARAP_08.05.2020_00h00 | 0,032554209 | 0,04921703  | 7,52287E-10 | 6,3765E-09 | [4, 5, 6]                      | Group175 | 7,35  | 5,00  |
| GO:0034329 | cell junction assembly                                   | GO_BiologicalProcess-EBI-UniProt-GOA-ACAP-ARAP_08.05.2020_00h00 | 0,000284442 | 0,001361054 | 7,52287E-10 | 6,3765E-09 | [5]                            | Group175 | 5,54  | 26,00 |
| GO:1901888 | regulation of cell junction assembly                     | GO_BiologicalProcess-EBI-UniProt-GOA-ACAP-ARAP_08.05.2020_00h00 | 0,029677309 | 0,045956612 | 7,52287E-10 | 6,3765E-09 | [4, 5, 6]                      | Group175 | 5,02  | 11,00 |
| GO:0001952 | regulation of cell-matrix adhesion                       | GO_BiologicalProcess-EBI-UniProt-GOA-ACAP-ARAP_08.05.2020_00h00 | 4,35039E-05 | 0,000308394 | 7,52287E-10 | 6,3765E-09 | [5, 6]                         | Group175 | 9,85  | 13,00 |
| GO:1901890 | positive regulation of cell junction assembly            | GO_BiologicalProcess-EBI-UniProt-GOA-ACAP-ARAP_08.05.2020_00h00 | 0,023341313 | 0,038579684 | 7,52287E-10 | 6,3765E-09 | [4, 5, 6, 7]                   | Group175 | 6,48  | 7,00  |
| GO:0001954 | positive regulation of cell-matrix adhesion              | GO_BiologicalProcess-EBI-UniProt-GOA-ACAP-ARAP_08.05.2020_00h00 | 0,000936067 | 0,003342597 | 7,52287E-10 | 6,3765E-09 | [5, 6, 7]                      | Group175 | 11,67 | 7,00  |
| GO:0007044 | cell-substrate junction assembly                         | GO_BiologicalProcess-EBI-UniProt-GOA-ACAP-ARAP_08.05.2020_00h00 | 6,03086E-06 | 5,82983E-05 | 7,52287E-10 | 6,3765E-09 | [6]                            | Group175 | 11,82 | 13,00 |
| GO:0048041 | focal adhesion assembly                                  | GO_BiologicalProcess-EBI-UniProt-GOA-ACAP-ARAP_08.05.2020_00h00 | 0,00302181  | 0,00814612  | 7,52287E-10 | 6,3765E-09 | [5, 7]                         | Group175 | 8,60  | 8,00  |
| GO:0031581 | hemidesmosome assembly                                   | GO_BiologicalProcess-EBI-UniProt-GOA-ACAP-ARAP_08.05.2020_00h00 | 1,29834E-05 | 0,000111938 | 7,52287E-10 | 6,3765E-09 | [7]                            | Group175 | 38,46 | 5,00  |
| GO:0050860 | negative regulation of T cell receptor signaling pathway | GO_BiologicalProcess-EBI-UniProt-GOA-ACAP-ARAP_08.05.2020_00h00 | 0,00033793  | 0,001562316 | 7,52287E-10 | 6,3765E-09 | [4, 5, 6, 7, 8, 9, 10, 11, 12] | Group175 | 20,83 | 5,00  |
| GO:0004713 | protein tyrosine kinase activity                         | GO_BiologicalProcess-EBI-UniProt-GOA-ACAP-ARAP_08.05.2020_00h00 | 0,017674305 | 0,031322796 | 7,52287E-10 | 6,3765E-09 | [8, 9, 10]                     | Group175 | 5,08  | 13,00 |
| GO:0033002 | muscle cell proliferation                                | GO_BiologicalProcess-EBI-UniProt-GOA-ACAP-ARAP_08.05.2020_00h00 | 3,12928E-05 | 0,000233963 | 1,83274E-09 | 1,4829E-08 | [3]                            | Group122 | 8,25  | 17,00 |
| GO:0042127 | regulation of cell population proliferation              | GO_BiologicalProcess-EBI-UniProt-GOA-ACAP-ARAP_08.05.2020_00h00 | 9,02399E-10 | 5,75731E-08 | 1,83274E-09 | 1,4829E-08 | [3, 4]                         | Group122 | 5,05  | 89,00 |
| GO:0008284 | positive regulation of cell population proliferation     | GO_BiologicalProcess-EBI-UniProt-GOA-ACAP-ARAP_08.05.2020_00h00 | 8,18119E-08 | 1,37358E-06 | 1,83274E-09 | 1,4829E-08 | [3, 4, 5]                      | Group122 | 5,61  | 55,00 |
| GO:0060548 | negative regulation of cell death                        | GO_BiologicalProcess-EBI-UniProt-GOA-ACAP-ARAP_08.05.2020_00h00 | 6,67908E-06 | 6,3286E-05  | 1,83274E-09 | 1,4829E-08 | [3, 4, 5]                      | Group122 | 4,93  | 53,00 |
| GO:0050678 | regulation of epithelial cell proliferation              | GO_BiologicalProcess-EBI-UniProt-GOA-ACAP-ARAP_08.05.2020_00h00 | 4,34628E-05 | 0,000310403 | 1,83274E-09 | 1,4829E-08 | [4, 5]                         | Group122 | 6,50  | 24,00 |



|            |                                                                                        |                                                                 |             |             |             |            |                             |          |       |        |
|------------|----------------------------------------------------------------------------------------|-----------------------------------------------------------------|-------------|-------------|-------------|------------|-----------------------------|----------|-------|--------|
| GO:0050679 | positive regulation of epithelial cell proliferation                                   | GO_BiologicalProcess-EBI-UniProt-GOA-ACAP-ARAP_08.05.2020_00h00 | 0,00018895  | 0,000982745 | 1,83274E-09 | 1,4829E-08 | [4, 5, 6]                   | Group122 | 7,41  | 16,00  |
| GO:0070848 | response to growth factor                                                              | GO_BiologicalProcess-EBI-UniProt-GOA-ACAP-ARAP_08.05.2020_00h00 | 1,15067E-05 | 0,000101962 | 2,70404E-09 | 2,0927E-08 | [4]                         | Group160 | 5,37  | 41,00  |
| GO:0071310 | cellular response to organic substance                                                 | GO_BiologicalProcess-EBI-UniProt-GOA-ACAP-ARAP_08.05.2020_00h00 | 3,0656E-08  | 6,24208E-07 | 2,70404E-09 | 2,0927E-08 | [4]                         | Group160 | 4,21  | 122,00 |
| GO:0090287 | regulation of cellular response to growth factor stimulus                              | GO_BiologicalProcess-EBI-UniProt-GOA-ACAP-ARAP_08.05.2020_00h00 | 0,00110216  | 0,003767027 | 2,70404E-09 | 2,0927E-08 | [3, 4, 6]                   | Group160 | 5,94  | 18,00  |
| GO:0007167 | enzyme linked receptor protein signaling pathway                                       | GO_BiologicalProcess-EBI-UniProt-GOA-ACAP-ARAP_08.05.2020_00h00 | 3,81246E-06 | 3,96579E-05 | 2,70404E-09 | 2,0927E-08 | [4, 5, 6]                   | Group160 | 4,96  | 55,00  |
| GO:0071363 | cellular response to growth factor stimulus                                            | GO_BiologicalProcess-EBI-UniProt-GOA-ACAP-ARAP_08.05.2020_00h00 | 2,22323E-05 | 0,000175837 | 2,70404E-09 | 2,0927E-08 | [5]                         | Group160 | 5,33  | 39,00  |
| GO:0071560 | cellular response to transforming growth factor beta stimulus                          | GO_BiologicalProcess-EBI-UniProt-GOA-ACAP-ARAP_08.05.2020_00h00 | 0,006329319 | 0,014387551 | 2,70404E-09 | 2,0927E-08 | [4, 6]                      | Group160 | 5,60  | 14,00  |
| GO:0090288 | negative regulation of cellular response to growth factor stimulus                     | GO_BiologicalProcess-EBI-UniProt-GOA-ACAP-ARAP_08.05.2020_00h00 | 0,012154936 | 0,023885572 | 2,70404E-09 | 2,0927E-08 | [3, 4, 5, 6, 7]             | Group160 | 6,02  | 10,00  |
| GO:0007169 | transmembrane receptor protein tyrosine kinase signaling pathway                       | GO_BiologicalProcess-EBI-UniProt-GOA-ACAP-ARAP_08.05.2020_00h00 | 0,00012082  | 0,000718164 | 2,70404E-09 | 2,0927E-08 | [5, 6, 7]                   | Group160 | 4,97  | 38,00  |
| GO:0090092 | regulation of transmembrane receptor protein serine/threonine kinase signaling pathway | GO_BiologicalProcess-EBI-UniProt-GOA-ACAP-ARAP_08.05.2020_00h00 | 0,018717377 | 0,032806829 | 2,70404E-09 | 2,0927E-08 | [4, 5, 6, 7, 8]             | Group160 | 5,04  | 13,00  |
| GO:0030510 | regulation of BMP signaling pathway                                                    | GO_BiologicalProcess-EBI-UniProt-GOA-ACAP-ARAP_08.05.2020_00h00 | 0,013690378 | 0,025892671 | 2,70404E-09 | 2,0927E-08 | [4, 5, 6, 7, 8, 9]          | Group160 | 7,22  | 7,00   |
| GO:0030513 | positive regulation of BMP signaling pathway                                           | GO_BiologicalProcess-EBI-UniProt-GOA-ACAP-ARAP_08.05.2020_00h00 | 0,016912684 | 0,030253155 | 2,70404E-09 | 2,0927E-08 | [5, 6, 7, 8, 9, 10]         | Group160 | 10,53 | 4,00   |
| GO:0001935 | endothelial cell proliferation                                                         | GO_BiologicalProcess-EBI-UniProt-GOA-ACAP-ARAP_08.05.2020_00h00 | 0,003633375 | 0,00934715  | 3,62156E-09 | 2,686E-08  | [4]                         | Group161 | 6,79  | 11,00  |
| GO:1901342 | regulation of vasculature development                                                  | GO_BiologicalProcess-EBI-UniProt-GOA-ACAP-ARAP_08.05.2020_00h00 | 1,26962E-05 | 0,00011147  | 3,62156E-09 | 2,686E-08  | [4, 5, 6, 7, 8]             | Group161 | 6,85  | 25,00  |
| GO:1901343 | negative regulation of vasculature development                                         | GO_BiologicalProcess-EBI-UniProt-GOA-ACAP-ARAP_08.05.2020_00h00 | 0,028789286 | 0,045166142 | 3,62156E-09 | 2,686E-08  | [3, 4, 5, 6, 7, 8, 9]       | Group161 | 5,80  | 8,00   |
| GO:0001525 | angiogenesis                                                                           | GO_BiologicalProcess-EBI-UniProt-GOA-ACAP-ARAP_08.05.2020_00h00 | 5,95789E-09 | 2,11174E-07 | 3,62156E-09 | 2,686E-08  | [3, 4, 5, 6, 7, 8, 9, 10]   | Group161 | 7,27  | 40,00  |
| GO:0043534 | blood vessel endothelial cell migration                                                | GO_BiologicalProcess-EBI-UniProt-GOA-ACAP-ARAP_08.05.2020_00h00 | 0,00532592  | 0,012492415 | 3,62156E-09 | 2,686E-08  | [6, 7, 8]                   | Group161 | 7,26  | 9,00   |
| GO:0043535 | regulation of blood vessel endothelial cell migration                                  | GO_BiologicalProcess-EBI-UniProt-GOA-ACAP-ARAP_08.05.2020_00h00 | 0,004171744 | 0,010316174 | 3,62156E-09 | 2,686E-08  | [5, 6, 7, 8, 9]             | Group161 | 8,16  | 8,00   |
| GO:0002040 | sprouting angiogenesis                                                                 | GO_BiologicalProcess-EBI-UniProt-GOA-ACAP-ARAP_08.05.2020_00h00 | 0,00041584  | 0,001833911 | 3,62156E-09 | 2,686E-08  | [4, 5, 6, 7, 8, 9, 10, 11]  | Group161 | 8,87  | 11,00  |
| GO:0045765 | regulation of angiogenesis                                                             | GO_BiologicalProcess-EBI-UniProt-GOA-ACAP-ARAP_08.05.2020_00h00 | 5,97633E-05 | 0,000405628 | 3,62156E-09 | 2,686E-08  | [4, 5, 6, 7, 8, 9, 10, 11]  | Group161 | 6,69  | 22,00  |
| GO:0002043 | blood vessel endothelial cell proliferation involved in sprouting angiogenesis         | GO_BiologicalProcess-EBI-UniProt-GOA-ACAP-ARAP_08.05.2020_00h00 | 0,00033793  | 0,001562316 | 3,62156E-09 | 2,686E-08  | [5, 6, 7, 8, 9, 10, 11, 12] | Group161 | 20,83 | 5,00   |
| GO:1903670 | regulation of sprouting angiogenesis                                                   | GO_BiologicalProcess-EBI-UniProt-GOA-ACAP-ARAP_08.05.2020_00h00 | 0,003441989 | 0,008951043 | 3,62156E-09 | 2,686E-08  | [5, 6, 7, 8, 9, 10, 11, 12] | Group161 | 9,33  | 7,00   |

|            |                                                        |                                                                 |             |             |             |            |                                    |          |       |        |
|------------|--------------------------------------------------------|-----------------------------------------------------------------|-------------|-------------|-------------|------------|------------------------------------|----------|-------|--------|
| GO:1903671 | negative regulation of sprouting angiogenesis          | GO_BiologicalProcess-EBI-UniProt-GOA-ACAP-ARAP_08.05.2020_00h00 | 0,032678593 | 0,04924947  | 3,62156E-09 | 2,686E-08  | [5, 6, 7, 8, 9, 10, 11, 12, 13]    | Group161 | 11,11 | 3,00   |
| GO:0050839 | cell adhesion molecule binding                         | GO_MolecularFunction-EBI-UniProt-GOA-ACAP-ARAP_08.05.2020_00h00 | 5,04854E-10 | 3,7165E-08  | 4,39417E-09 | 3,1286E-08 | [3]                                | Group074 | 7,66  | 42,00  |
| GO:0005178 | integrin binding                                       | GO_MolecularFunction-EBI-UniProt-GOA-ACAP-ARAP_08.05.2020_00h00 | 8,79082E-07 | 1,09257E-05 | 4,39417E-09 | 3,1286E-08 | [3, 4]                             | Group074 | 10,76 | 17,00  |
| GO:0045296 | cadherin binding                                       | GO_MolecularFunction-EBI-UniProt-GOA-ACAP-ARAP_08.05.2020_00h00 | 0,000159296 | 0,000886316 | 4,39417E-09 | 3,1286E-08 | [4]                                | Group074 | 6,25  | 22,00  |
| GO:0007229 | integrin-mediated signaling pathway                    | GO_BiologicalProcess-EBI-UniProt-GOA-ACAP-ARAP_08.05.2020_00h00 | 0,001144356 | 0,003883505 | 4,39417E-09 | 3,1286E-08 | [4, 5, 6]                          | Group074 | 8,40  | 10,00  |
| GO:0040012 | regulation of locomotion                               | GO_BiologicalProcess-EBI-UniProt-GOA-ACAP-ARAP_08.05.2020_00h00 | 1,89996E-12 | 1,81826E-09 | 9,46731E-09 | 6,4815E-08 | [2, 3]                             | Group152 | 6,58  | 68,00  |
| GO:0040017 | positive regulation of locomotion                      | GO_BiologicalProcess-EBI-UniProt-GOA-ACAP-ARAP_08.05.2020_00h00 | 2,08823E-09 | 9,51635E-08 | 9,46731E-09 | 6,4815E-08 | [2, 3, 4]                          | Group152 | 7,20  | 43,00  |
| GO:0006935 | chemotaxis                                             | GO_BiologicalProcess-EBI-UniProt-GOA-ACAP-ARAP_08.05.2020_00h00 | 0,001700784 | 0,00538957  | 9,46731E-09 | 6,4815E-08 | [3, 4]                             | Group152 | 4,56  | 32,00  |
| GO:0051270 | regulation of cellular component movement              | GO_BiologicalProcess-EBI-UniProt-GOA-ACAP-ARAP_08.05.2020_00h00 | 4,42024E-11 | 2,11509E-08 | 9,46731E-09 | 6,4815E-08 | [3, 4]                             | Group152 | 6,18  | 67,00  |
| GO:0000904 | cell morphogenesis involved in differentiation         | GO_BiologicalProcess-EBI-UniProt-GOA-ACAP-ARAP_08.05.2020_00h00 | 0,000202059 | 0,001034068 | 9,46731E-09 | 6,4815E-08 | [4, 5]                             | Group152 | 4,80  | 39,00  |
| GO:0120039 | plasma membrane bounded cell projection morphogenesis  | GO_BiologicalProcess-EBI-UniProt-GOA-ACAP-ARAP_08.05.2020_00h00 | 0,009786652 | 0,020228567 | 9,46731E-09 | 6,4815E-08 | [5, 6, 7]                          | Group152 | 4,12  | 30,00  |
| GO:0048667 | cell morphogenesis involved in neuron differentiation  | GO_BiologicalProcess-EBI-UniProt-GOA-ACAP-ARAP_08.05.2020_00h00 | 0,006632533 | 0,014899846 | 9,46731E-09 | 6,4815E-08 | [5, 6, 8, 9, 10]                   | Group152 | 4,33  | 28,00  |
| GO:0007411 | axon guidance                                          | GO_BiologicalProcess-EBI-UniProt-GOA-ACAP-ARAP_08.05.2020_00h00 | 0,014432535 | 0,026663968 | 9,46731E-09 | 6,4815E-08 | [4, 5, 6, 7, 8, 9, 10, 11, 12, 13] | Group152 | 4,93  | 15,00  |
| GO:0061564 | axon development                                       | GO_BiologicalProcess-EBI-UniProt-GOA-ACAP-ARAP_08.05.2020_00h00 | 0,00784214  | 0,01709551  | 9,46731E-09 | 6,4815E-08 | [6, 7, 9, 10, 11]                  | Group152 | 4,42  | 25,00  |
| GO:0048584 | positive regulation of response to stimulus            | GO_BiologicalProcess-EBI-UniProt-GOA-ACAP-ARAP_08.05.2020_00h00 | 2,07976E-07 | 3,15925E-06 | 1,09679E-08 | 7,2307E-08 | [2, 3, 4]                          | Group100 | 4,21  | 109,00 |
| GO:0042127 | regulation of cell population proliferation            | GO_BiologicalProcess-EBI-UniProt-GOA-ACAP-ARAP_08.05.2020_00h00 | 9,02399E-10 | 5,75731E-08 | 1,09679E-08 | 7,2307E-08 | [3, 4]                             | Group100 | 5,05  | 89,00  |
| GO:0008284 | positive regulation of cell population proliferation   | GO_BiologicalProcess-EBI-UniProt-GOA-ACAP-ARAP_08.05.2020_00h00 | 8,18119E-08 | 1,37358E-06 | 1,09679E-08 | 7,2307E-08 | [3, 4, 5]                          | Group100 | 5,61  | 55,00  |
| GO:0008285 | negative regulation of cell population proliferation   | GO_BiologicalProcess-EBI-UniProt-GOA-ACAP-ARAP_08.05.2020_00h00 | 0,002655257 | 0,007430061 | 1,09679E-08 | 7,2307E-08 | [3, 4, 5]                          | Group100 | 4,39  | 33,00  |
| GO:0042981 | regulation of apoptotic process                        | GO_BiologicalProcess-EBI-UniProt-GOA-ACAP-ARAP_08.05.2020_00h00 | 1,11326E-06 | 1,33174E-05 | 1,09679E-08 | 7,2307E-08 | [5, 6]                             | Group100 | 4,59  | 75,00  |
| GO:0006793 | phosphorus metabolic process                           | GO_BiologicalProcess-EBI-UniProt-GOA-ACAP-ARAP_08.05.2020_00h00 | 6,13427E-09 | 2,09661E-07 | 1,17301E-08 | 7,457E-08  | [3]                                | Group173 | 4,09  | 144,00 |
| GO:0019637 | organophosphate metabolic process                      | GO_BiologicalProcess-EBI-UniProt-GOA-ACAP-ARAP_08.05.2020_00h00 | 0,000611052 | 0,002436569 | 1,17301E-08 | 7,457E-08  | [3, 4]                             | Group173 | 4,26  | 48,00  |
| GO:0006796 | phosphate-containing compound metabolic process        | GO_BiologicalProcess-EBI-UniProt-GOA-ACAP-ARAP_08.05.2020_00h00 | 2,32844E-08 | 5,06435E-07 | 1,17301E-08 | 7,457E-08  | [4]                                | Group173 | 4,04  | 141,00 |
| GO:0055086 | nucleobase-containing small molecule metabolic process | GO_BiologicalProcess-EBI-UniProt-GOA-ACAP-ARAP_08.05.2020_00h00 | 0,003933324 | 0,009853902 | 1,17301E-08 | 7,457E-08  | [3, 4, 5]                          | Group173 | 4,41  | 30,00  |

|            |                                                        |                                                                 |             |             |             |            |                     |          |       |        |
|------------|--------------------------------------------------------|-----------------------------------------------------------------|-------------|-------------|-------------|------------|---------------------|----------|-------|--------|
| GO:0006644 | phospholipid metabolic process                         | GO_BiologicalProcess-EBI-UniProt-GOA-ACAP-ARAP_08.05.2020_00h00 | 0,002634456 | 0,007393474 | 1,17301E-08 | 7,457E-08  | [4, 5]              | Group173 | 4,97  | 23,00  |
| GO:0030258 | lipid modification                                     | GO_BiologicalProcess-EBI-UniProt-GOA-ACAP-ARAP_08.05.2020_00h00 | 0,027085837 | 0,043130025 | 1,17301E-08 | 7,457E-08  | [4, 5]              | Group173 | 4,56  | 15,00  |
| GO:0046486 | glycerolipid metabolic process                         | GO_BiologicalProcess-EBI-UniProt-GOA-ACAP-ARAP_08.05.2020_00h00 | 0,004992535 | 0,01194464  | 1,17301E-08 | 7,457E-08  | [4, 5]              | Group173 | 4,71  | 23,00  |
| GO:0090407 | organophosphate biosynthetic process                   | GO_BiologicalProcess-EBI-UniProt-GOA-ACAP-ARAP_08.05.2020_00h00 | 0,000779392 | 0,002936529 | 1,17301E-08 | 7,457E-08  | [4, 5]              | Group173 | 4,79  | 32,00  |
| GO:0008654 | phospholipid biosynthetic process                      | GO_BiologicalProcess-EBI-UniProt-GOA-ACAP-ARAP_08.05.2020_00h00 | 0,002142059 | 0,006386139 | 1,17301E-08 | 7,457E-08  | [4, 5, 6]           | Group173 | 5,74  | 17,00  |
| GO:0045017 | glycerolipid biosynthetic process                      | GO_BiologicalProcess-EBI-UniProt-GOA-ACAP-ARAP_08.05.2020_00h00 | 0,010909148 | 0,021886906 | 1,17301E-08 | 7,457E-08  | [4, 5, 6]           | Group173 | 5,10  | 15,00  |
| GO:0006650 | glycerophospholipid metabolic process                  | GO_BiologicalProcess-EBI-UniProt-GOA-ACAP-ARAP_08.05.2020_00h00 | 0,003137021 | 0,008339248 | 1,17301E-08 | 7,457E-08  | [5, 6]              | Group173 | 5,17  | 20,00  |
| GO:0046834 | lipid phosphorylation                                  | GO_BiologicalProcess-EBI-UniProt-GOA-ACAP-ARAP_08.05.2020_00h00 | 0,005052869 | 0,011969296 | 1,17301E-08 | 7,457E-08  | [5, 6]              | Group173 | 7,32  | 9,00   |
| GO:0009117 | nucleotide metabolic process                           | GO_BiologicalProcess-EBI-UniProt-GOA-ACAP-ARAP_08.05.2020_00h00 | 0,022016035 | 0,036963765 | 1,17301E-08 | 7,457E-08  | [5, 6, 7]           | Group173 | 4,07  | 24,00  |
| GO:0046488 | phosphatidylinositol metabolic process                 | GO_BiologicalProcess-EBI-UniProt-GOA-ACAP-ARAP_08.05.2020_00h00 | 0,017771911 | 0,031437557 | 1,17301E-08 | 7,457E-08  | [6, 7]              | Group173 | 5,24  | 12,00  |
| GO:0043550 | regulation of lipid kinase activity                    | GO_BiologicalProcess-EBI-UniProt-GOA-ACAP-ARAP_08.05.2020_00h00 | 0,030797191 | 0,047081329 | 1,17301E-08 | 7,457E-08  | [5, 6, 7, 8, 9]     | Group173 | 7,46  | 5,00   |
| GO:0046856 | phosphatidylinositol dephosphorylation                 | GO_BiologicalProcess-EBI-UniProt-GOA-ACAP-ARAP_08.05.2020_00h00 | 0,007393209 | 0,016265061 | 1,17301E-08 | 7,457E-08  | [6, 7, 8]           | Group173 | 13,33 | 4,00   |
| GO:0006974 | cellular response to DNA damage stimulus               | GO_BiologicalProcess-EBI-UniProt-GOA-ACAP-ARAP_08.05.2020_00h00 | 0,001050609 | 0,003642874 | 1,34163E-08 | 8,2348E-08 | [4]                 | Group140 | 4,38  | 40,00  |
| GO:0080135 | regulation of cellular response to stress              | GO_BiologicalProcess-EBI-UniProt-GOA-ACAP-ARAP_08.05.2020_00h00 | 5,18829E-08 | 9,54845E-07 | 1,34163E-08 | 8,2348E-08 | [3, 4, 5]           | Group140 | 6,08  | 48,00  |
| GO:2001020 | regulation of response to DNA damage stimulus          | GO_BiologicalProcess-EBI-UniProt-GOA-ACAP-ARAP_08.05.2020_00h00 | 0,004286675 | 0,010465174 | 1,34163E-08 | 8,2348E-08 | [4, 5, 6]           | Group140 | 5,86  | 14,00  |
| GO:2001021 | negative regulation of response to DNA damage stimulus | GO_BiologicalProcess-EBI-UniProt-GOA-ACAP-ARAP_08.05.2020_00h00 | 0,030644687 | 0,046923146 | 1,34163E-08 | 8,2348E-08 | [3, 4, 5, 6, 7]     | Group140 | 6,67  | 6,00   |
| GO:0051052 | regulation of DNA metabolic process                    | GO_BiologicalProcess-EBI-UniProt-GOA-ACAP-ARAP_08.05.2020_00h00 | 0,002958667 | 0,008043876 | 1,34163E-08 | 8,2348E-08 | [4, 5, 6, 7]        | Group140 | 5,19  | 20,00  |
| GO:0051053 | negative regulation of DNA metabolic process           | GO_BiologicalProcess-EBI-UniProt-GOA-ACAP-ARAP_08.05.2020_00h00 | 0,02470557  | 0,040278073 | 1,34163E-08 | 8,2348E-08 | [4, 5, 6, 7, 8]     | Group140 | 5,97  | 8,00   |
| GO:2000780 | negative regulation of double-strand break repair      | GO_BiologicalProcess-EBI-UniProt-GOA-ACAP-ARAP_08.05.2020_00h00 | 0,014057252 | 0,026326399 | 1,34163E-08 | 8,2348E-08 | [5, 6, 7, 8, 9, 10] | Group140 | 11,11 | 4,00   |
| GO:0032970 | regulation of actin filament-based process             | GO_BiologicalProcess-EBI-UniProt-GOA-ACAP-ARAP_08.05.2020_00h00 | 0,000145525 | 0,000819218 | 1,52233E-08 | 9,0325E-08 | [3, 4]              | Group182 | 5,90  | 25,00  |
| GO:0044087 | regulation of cellular component biogenesis            | GO_BiologicalProcess-EBI-UniProt-GOA-ACAP-ARAP_08.05.2020_00h00 | 0,003717563 | 0,00943689  | 1,52233E-08 | 9,0325E-08 | [3, 4]              | Group182 | 4,03  | 42,00  |
| GO:0051128 | regulation of cellular component organization          | GO_BiologicalProcess-EBI-UniProt-GOA-ACAP-ARAP_08.05.2020_00h00 | 9,5472E-08  | 1,54859E-06 | 1,52233E-08 | 9,0325E-08 | [3, 4]              | Group182 | 4,27  | 109,00 |
| GO:0044089 | positive regulation of cellular component biogenesis   | GO_BiologicalProcess-EBI-UniProt-GOA-ACAP-ARAP_08.05.2020_00h00 | 0,006975319 | 0,01552414  | 1,52233E-08 | 9,0325E-08 | [3, 4, 5]           | Group182 | 4,41  | 26,00  |

|            |                                                                        |                                                                 |             |             |             |            |                                                |          |       |       |
|------------|------------------------------------------------------------------------|-----------------------------------------------------------------|-------------|-------------|-------------|------------|------------------------------------------------|----------|-------|-------|
| GO:0051130 | positive regulation of cellular component organization                 | GO_BiologicalProcess-EBI-UniProt-GOA-ACAP-ARAP_08.05.2020_00h00 | 7,13305E-08 | 1,24115E-06 | 1,52233E-08 | 9,0325E-08 | [3, 4, 5]                                      | Group182 | 5,15  | 67,00 |
| GO:0097435 | supramolecular fiber organization                                      | GO_BiologicalProcess-EBI-UniProt-GOA-ACAP-ARAP_08.05.2020_00h00 | 0,002547205 | 0,007233459 | 1,52233E-08 | 9,0325E-08 | [4]                                            | Group182 | 4,41  | 33,00 |
| GO:0030036 | actin cytoskeleton organization                                        | GO_BiologicalProcess-EBI-UniProt-GOA-ACAP-ARAP_08.05.2020_00h00 | 0,000141026 | 0,000808154 | 1,52233E-08 | 9,0325E-08 | [3, 6]                                         | Group182 | 4,99  | 37,00 |
| GO:0033043 | regulation of organelle organization                                   | GO_BiologicalProcess-EBI-UniProt-GOA-ACAP-ARAP_08.05.2020_00h00 | 0,000797572 | 0,002958436 | 1,52233E-08 | 9,0325E-08 | [4, 5]                                         | Group182 | 4,03  | 56,00 |
| GO:1902903 | regulation of supramolecular fiber organization                        | GO_BiologicalProcess-EBI-UniProt-GOA-ACAP-ARAP_08.05.2020_00h00 | 0,000770037 | 0,002912747 | 1,52233E-08 | 9,0325E-08 | [4, 5]                                         | Group182 | 5,57  | 22,00 |
| GO:0010638 | positive regulation of organelle organization                          | GO_BiologicalProcess-EBI-UniProt-GOA-ACAP-ARAP_08.05.2020_00h00 | 0,002543105 | 0,007243308 | 1,52233E-08 | 9,0325E-08 | [4, 5, 6]                                      | Group182 | 4,49  | 31,00 |
| GO:1902905 | positive regulation of supramolecular fiber organization               | GO_BiologicalProcess-EBI-UniProt-GOA-ACAP-ARAP_08.05.2020_00h00 | 0,002495378 | 0,007149931 | 1,52233E-08 | 9,0325E-08 | [4, 5, 6]                                      | Group182 | 6,22  | 14,00 |
| GO:0007015 | actin filament organization                                            | GO_BiologicalProcess-EBI-UniProt-GOA-ACAP-ARAP_08.05.2020_00h00 | 0,002237182 | 0,006607973 | 1,52233E-08 | 9,0325E-08 | [4, 5, 7]                                      | Group182 | 5,03  | 23,00 |
| GO:0031032 | actomyosin structure organization                                      | GO_BiologicalProcess-EBI-UniProt-GOA-ACAP-ARAP_08.05.2020_00h00 | 0,000129235 | 0,000758763 | 1,52233E-08 | 9,0325E-08 | [4, 7]                                         | Group182 | 7,66  | 16,00 |
| GO:0032956 | regulation of actin cytoskeleton organization                          | GO_BiologicalProcess-EBI-UniProt-GOA-ACAP-ARAP_08.05.2020_00h00 | 0,000413217 | 0,001830783 | 1,52233E-08 | 9,0325E-08 | [4, 5, 6, 7]                                   | Group182 | 5,84  | 22,00 |
| GO:0051493 | regulation of cytoskeleton organization                                | GO_BiologicalProcess-EBI-UniProt-GOA-ACAP-ARAP_08.05.2020_00h00 | 0,003203749 | 0,008493042 | 1,52233E-08 | 9,0325E-08 | [5, 6]                                         | Group182 | 4,62  | 27,00 |
| GO:1901890 | positive regulation of cell junction assembly                          | GO_BiologicalProcess-EBI-UniProt-GOA-ACAP-ARAP_08.05.2020_00h00 | 0,023341313 | 0,038579684 | 1,52233E-08 | 9,0325E-08 | [4, 5, 6, 7]                                   | Group182 | 6,48  | 7,00  |
| GO:0051495 | positive regulation of cytoskeleton organization                       | GO_BiologicalProcess-EBI-UniProt-GOA-ACAP-ARAP_08.05.2020_00h00 | 0,013936384 | 0,026202591 | 1,52233E-08 | 9,0325E-08 | [5, 6, 7]                                      | Group182 | 5,24  | 13,00 |
| GO:0110053 | regulation of actin filament organization                              | GO_BiologicalProcess-EBI-UniProt-GOA-ACAP-ARAP_08.05.2020_00h00 | 0,000781211 | 0,002931841 | 1,52233E-08 | 9,0325E-08 | [5, 6, 7, 8]                                   | Group182 | 6,12  | 18,00 |
| GO:0051017 | actin filament bundle assembly                                         | GO_BiologicalProcess-EBI-UniProt-GOA-ACAP-ARAP_08.05.2020_00h00 | 2,96766E-05 | 0,000225401 | 1,52233E-08 | 9,0325E-08 | [5, 6, 7, 9]                                   | Group182 | 9,09  | 15,00 |
| GO:0032231 | regulation of actin filament bundle assembly                           | GO_BiologicalProcess-EBI-UniProt-GOA-ACAP-ARAP_08.05.2020_00h00 | 5,44583E-06 | 5,48596E-05 | 1,52233E-08 | 9,0325E-08 | [4, 5, 6, 7, 8, 9, 10]                         | Group182 | 11,93 | 13,00 |
| GO:0032232 | negative regulation of actin filament bundle assembly                  | GO_BiologicalProcess-EBI-UniProt-GOA-ACAP-ARAP_08.05.2020_00h00 | 0,010381774 | 0,021094177 | 1,52233E-08 | 9,0325E-08 | [5, 6, 7, 8, 9, 10, 11]                        | Group182 | 12,12 | 4,00  |
| GO:0043149 | stress fiber assembly                                                  | GO_BiologicalProcess-EBI-UniProt-GOA-ACAP-ARAP_08.05.2020_00h00 | 7,36972E-06 | 6,91454E-05 | 1,52233E-08 | 9,0325E-08 | [5, 7, 8, 9, 11]                               | Group182 | 11,61 | 13,00 |
| GO:0051496 | positive regulation of stress fiber assembly                           | GO_BiologicalProcess-EBI-UniProt-GOA-ACAP-ARAP_08.05.2020_00h00 | 0,00011102  | 0,000676726 | 1,52233E-08 | 9,0325E-08 | [5, 6, 7, 8, 9, 10, 11, 12, 13]                | Group182 | 14,04 | 8,00  |
| GO:0015278 | calcium-release channel activity                                       | GO_BiologicalProcess-EBI-UniProt-GOA-ACAP-ARAP_08.05.2020_00h00 | 0,010487842 | 0,021219587 | 1,8002E-08  | 1,0337E-07 | [5, 6, 7, 8, 9, 10, 11, 12, 13, 14, 15]        | Group189 | 9,80  | 5,00  |
| GO:0051281 | positive regulation of release of sequestered calcium ion into cytosol | GO_BiologicalProcess-EBI-UniProt-GOA-ACAP-ARAP_08.05.2020_00h00 | 0,025549145 | 0,041231927 | 1,8002E-08  | 1,0337E-07 | [4, 5, 6, 7, 8, 9, 10, 11, 12, 13, 14, 15, 16] | Group189 | 9,30  | 4,00  |
| GO:0051235 | maintenance of location                                                | GO_BiologicalProcess-EBI-UniProt-GOA-ACAP-ARAP_08.05.2020_00h00 | 0,002857794 | 0,007836415 | 1,8002E-08  | 1,0337E-07 | [2, 3]                                         | Group189 | 5,32  | 19,00 |
| GO:0019725 | cellular homeostasis                                                   | GO_BiologicalProcess-EBI-UniProt-GOA-ACAP-ARAP_08.05.2020_00h00 | 4,43303E-05 | 0,000311942 | 1,8002E-08  | 1,0337E-07 | [2, 4]                                         | Group189 | 4,70  | 50,00 |

|            |                                                      |                                                                 |             |             |            |            |              |          |      |       |
|------------|------------------------------------------------------|-----------------------------------------------------------------|-------------|-------------|------------|------------|--------------|----------|------|-------|
| GO:0042592 | homeostatic process                                  | GO_BiologicalProcess-EBI-UniProt-GOA-ACAP-ARAP_08.05.2020_00h00 | 9,1536E-07  | 1,12308E-05 | 1,8002E-08 | 1,0337E-07 | [3]          | Group189 | 4,32 | 91,00 |
| GO:0051651 | maintenance of location in cell                      | GO_BiologicalProcess-EBI-UniProt-GOA-ACAP-ARAP_08.05.2020_00h00 | 0,00192218  | 0,005914877 | 1,8002E-08 | 1,0337E-07 | [2, 3, 4]    | Group189 | 6,17 | 15,00 |
| GO:0051049 | regulation of transport                              | GO_BiologicalProcess-EBI-UniProt-GOA-ACAP-ARAP_08.05.2020_00h00 | 6,30185E-05 | 0,00041881  | 1,8002E-08 | 1,0337E-07 | [3, 4]       | Group189 | 4,00 | 81,00 |
| GO:0051050 | positive regulation of transport                     | GO_BiologicalProcess-EBI-UniProt-GOA-ACAP-ARAP_08.05.2020_00h00 | 0,001033711 | 0,003597314 | 1,8002E-08 | 1,0337E-07 | [2, 3, 4, 5] | Group189 | 4,20 | 46,00 |
| GO:0051051 | negative regulation of transport                     | GO_BiologicalProcess-EBI-UniProt-GOA-ACAP-ARAP_08.05.2020_00h00 | 0,020912321 | 0,035610486 | 1,8002E-08 | 1,0337E-07 | [2, 3, 4, 5] | Group189 | 4,19 | 22,00 |
| GO:0060341 | regulation of cellular localization                  | GO_BiologicalProcess-EBI-UniProt-GOA-ACAP-ARAP_08.05.2020_00h00 | 0,000142641 | 0,000812543 | 1,8002E-08 | 1,0337E-07 | [3, 4]       | Group189 | 4,51 | 49,00 |
| GO:0034762 | regulation of transmembrane transport                | GO_BiologicalProcess-EBI-UniProt-GOA-ACAP-ARAP_08.05.2020_00h00 | 0,009670558 | 0,020031869 | 1,8002E-08 | 1,0337E-07 | [3, 4, 5]    | Group189 | 4,29 | 26,00 |
| GO:0048878 | chemical homeostasis                                 | GO_BiologicalProcess-EBI-UniProt-GOA-ACAP-ARAP_08.05.2020_00h00 | 0,000636798 | 0,002507882 | 1,8002E-08 | 1,0337E-07 | [4]          | Group189 | 4,13 | 53,00 |
| GO:0055082 | cellular chemical homeostasis                        | GO_BiologicalProcess-EBI-UniProt-GOA-ACAP-ARAP_08.05.2020_00h00 | 2,01483E-05 | 0,000163406 | 1,8002E-08 | 1,0337E-07 | [3, 5]       | Group189 | 5,04 | 45,00 |
| GO:0019751 | polyol metabolic process                             | GO_BiologicalProcess-EBI-UniProt-GOA-ACAP-ARAP_08.05.2020_00h00 | 0,006168251 | 0,014088344 | 1,8002E-08 | 1,0337E-07 | [4, 5]       | Group189 | 6,67 | 10,00 |
| GO:0034763 | negative regulation of transmembrane transport       | GO_BiologicalProcess-EBI-UniProt-GOA-ACAP-ARAP_08.05.2020_00h00 | 0,021045569 | 0,035773728 | 1,8002E-08 | 1,0337E-07 | [3, 4, 5, 6] | Group189 | 6,15 | 8,00  |
| GO:0034764 | positive regulation of transmembrane transport       | GO_BiologicalProcess-EBI-UniProt-GOA-ACAP-ARAP_08.05.2020_00h00 | 0,031413406 | 0,047870431 | 1,8002E-08 | 1,0337E-07 | [3, 4, 5, 6] | Group189 | 4,98 | 11,00 |
| GO:0043269 | regulation of ion transport                          | GO_BiologicalProcess-EBI-UniProt-GOA-ACAP-ARAP_08.05.2020_00h00 | 0,013630096 | 0,025880955 | 1,8002E-08 | 1,0337E-07 | [4, 5]       | Group189 | 4,02 | 30,00 |
| GO:0043270 | positive regulation of ion transport                 | GO_BiologicalProcess-EBI-UniProt-GOA-ACAP-ARAP_08.05.2020_00h00 | 0,029049521 | 0,045351375 | 1,8002E-08 | 1,0337E-07 | [3, 4, 5, 6] | Group189 | 4,62 | 14,00 |
| GO:0043271 | negative regulation of ion transport                 | GO_BiologicalProcess-EBI-UniProt-GOA-ACAP-ARAP_08.05.2020_00h00 | 0,011685916 | 0,023058603 | 1,8002E-08 | 1,0337E-07 | [3, 4, 5, 6] | Group189 | 6,06 | 10,00 |
| GO:0046165 | alcohol biosynthetic process                         | GO_BiologicalProcess-EBI-UniProt-GOA-ACAP-ARAP_08.05.2020_00h00 | 0,029087059 | 0,045336019 | 1,8002E-08 | 1,0337E-07 | [4, 5]       | Group189 | 5,24 | 10,00 |
| GO:0034765 | regulation of ion transmembrane transport            | GO_BiologicalProcess-EBI-UniProt-GOA-ACAP-ARAP_08.05.2020_00h00 | 0,028976446 | 0,045385364 | 1,8002E-08 | 1,0337E-07 | [4, 5, 6]    | Group189 | 4,10 | 21,00 |
| GO:0044070 | regulation of anion transport                        | GO_BiologicalProcess-EBI-UniProt-GOA-ACAP-ARAP_08.05.2020_00h00 | 0,032775592 | 0,049240567 | 1,8002E-08 | 1,0337E-07 | [5, 6]       | Group189 | 6,03 | 7,00  |
| GO:0046173 | polyol biosynthetic process                          | GO_BiologicalProcess-EBI-UniProt-GOA-ACAP-ARAP_08.05.2020_00h00 | 0,00929126  | 0,019456752 | 1,8002E-08 | 1,0337E-07 | [5, 6]       | Group189 | 7,78 | 7,00  |
| GO:0010959 | regulation of metal ion transport                    | GO_BiologicalProcess-EBI-UniProt-GOA-ACAP-ARAP_08.05.2020_00h00 | 0,008230304 | 0,017739642 | 1,8002E-08 | 1,0337E-07 | [5, 6, 7]    | Group189 | 4,73 | 20,00 |
| GO:0030001 | metal ion transport                                  | GO_BiologicalProcess-EBI-UniProt-GOA-ACAP-ARAP_08.05.2020_00h00 | 0,00093562  | 0,003353513 | 1,8002E-08 | 1,0337E-07 | [6]          | Group189 | 4,31 | 43,00 |
| GO:0030003 | cellular cation homeostasis                          | GO_BiologicalProcess-EBI-UniProt-GOA-ACAP-ARAP_08.05.2020_00h00 | 2,90438E-05 | 0,000224153 | 1,8002E-08 | 1,0337E-07 | [5, 7]       | Group189 | 5,32 | 38,00 |
| GO:0032412 | regulation of ion transmembrane transporter activity | GO_BiologicalProcess-EBI-UniProt-GOA-ACAP-ARAP_08.05.2020_00h00 | 0,00381815  | 0,009641081 | 1,8002E-08 | 1,0337E-07 | [5, 6, 7]    | Group189 | 5,57 | 16,00 |

|            |                                                      |                                                                 |             |             |             |            |                                     |          |      |       |
|------------|------------------------------------------------------|-----------------------------------------------------------------|-------------|-------------|-------------|------------|-------------------------------------|----------|------|-------|
| GO:0050806 | positive regulation of synaptic transmission         | GO_BiologicalProcess-EBI-UniProt-GOA-ACAP-ARAP_08.05.2020_00h00 | 0,010380722 | 0,021136915 | 1,8002E-08  | 1,0337E-07 | [3, 4, 5, 6, 7, 8, 9]               | Group189 | 5,88 | 11,00 |
| GO:0051208 | sequestering of calcium ion                          | GO_BiologicalProcess-EBI-UniProt-GOA-ACAP-ARAP_08.05.2020_00h00 | 0,000410002 | 0,001824987 | 1,8002E-08  | 1,0337E-07 | [3, 4, 5, 8, 10]                    | Group189 | 8,33 | 12,00 |
| GO:0098771 | inorganic ion homeostasis                            | GO_BiologicalProcess-EBI-UniProt-GOA-ACAP-ARAP_08.05.2020_00h00 | 0,000333665 | 0,001557644 | 1,8002E-08  | 1,0337E-07 | [6]                                 | Group189 | 4,73 | 38,00 |
| GO:1904062 | regulation of cation transmembrane transport         | GO_BiologicalProcess-EBI-UniProt-GOA-ACAP-ARAP_08.05.2020_00h00 | 0,004210313 | 0,010358021 | 1,8002E-08  | 1,0337E-07 | [5, 6, 7]                           | Group189 | 5,14 | 19,00 |
| GO:0006875 | cellular metal ion homeostasis                       | GO_BiologicalProcess-EBI-UniProt-GOA-ACAP-ARAP_08.05.2020_00h00 | 0,000161235 | 0,000881727 | 1,8002E-08  | 1,0337E-07 | [6, 8]                              | Group189 | 5,18 | 33,00 |
| GO:0070838 | divalent metal ion transport                         | GO_BiologicalProcess-EBI-UniProt-GOA-ACAP-ARAP_08.05.2020_00h00 | 0,001574539 | 0,005056488 | 1,8002E-08  | 1,0337E-07 | [7]                                 | Group189 | 4,93 | 26,00 |
| GO:0070588 | calcium ion transmembrane transport                  | GO_BiologicalProcess-EBI-UniProt-GOA-ACAP-ARAP_08.05.2020_00h00 | 0,003038352 | 0,008144826 | 1,8002E-08  | 1,0337E-07 | [6, 8, 9]                           | Group189 | 5,29 | 19,00 |
| GO:0010522 | regulation of calcium ion transport into cytosol     | GO_BiologicalProcess-EBI-UniProt-GOA-ACAP-ARAP_08.05.2020_00h00 | 0,007866058 | 0,017108677 | 1,8002E-08  | 1,0337E-07 | [3, 4, 5, 7, 8, 9, 10, 11, 13]      | Group189 | 7,34 | 8,00  |
| GO:0006874 | cellular calcium ion homeostasis                     | GO_BiologicalProcess-EBI-UniProt-GOA-ACAP-ARAP_08.05.2020_00h00 | 6,50747E-05 | 0,000426551 | 1,8002E-08  | 1,0337E-07 | [7, 9]                              | Group189 | 5,77 | 29,00 |
| GO:2001257 | regulation of cation channel activity                | GO_BiologicalProcess-EBI-UniProt-GOA-ACAP-ARAP_08.05.2020_00h00 | 0,002512984 | 0,007178881 | 1,8002E-08  | 1,0337E-07 | [6, 7, 8, 9, 10]                    | Group189 | 6,47 | 13,00 |
| GO:0060402 | calcium ion transport into cytosol                   | GO_BiologicalProcess-EBI-UniProt-GOA-ACAP-ARAP_08.05.2020_00h00 | 0,000377397 | 0,001703626 | 1,8002E-08  | 1,0337E-07 | [4, 10, 12]                         | Group189 | 7,57 | 14,00 |
| GO:0051209 | release of sequestered calcium ion into cytosol      | GO_BiologicalProcess-EBI-UniProt-GOA-ACAP-ARAP_08.05.2020_00h00 | 0,0002773   | 0,001333548 | 1,8002E-08  | 1,0337E-07 | [4, 5, 6, 7, 8, 10, 11, 12, 13, 14] | Group189 | 8,70 | 12,00 |
| GO:0051480 | regulation of cytosolic calcium ion concentration    | GO_BiologicalProcess-EBI-UniProt-GOA-ACAP-ARAP_08.05.2020_00h00 | 0,002075759 | 0,006286397 | 1,8002E-08  | 1,0337E-07 | [8, 10]                             | Group189 | 5,25 | 21,00 |
| GO:0033002 | muscle cell proliferation                            | GO_BiologicalProcess-EBI-UniProt-GOA-ACAP-ARAP_08.05.2020_00h00 | 3,12928E-05 | 0,000233963 | 2,73016E-08 | 1,5187E-07 | [3]                                 | Group176 | 8,25 | 17,00 |
| GO:0050673 | epithelial cell proliferation                        | GO_BiologicalProcess-EBI-UniProt-GOA-ACAP-ARAP_08.05.2020_00h00 | 3,83793E-06 | 3,94935E-05 | 2,73016E-08 | 1,5187E-07 | [3]                                 | Group176 | 6,71 | 29,00 |
| GO:0035019 | somatic stem cell population maintenance             | GO_BiologicalProcess-EBI-UniProt-GOA-ACAP-ARAP_08.05.2020_00h00 | 0,020465165 | 0,034911167 | 2,73016E-08 | 1,5187E-07 | [3, 4]                              | Group176 | 7,32 | 6,00  |
| GO:0001935 | endothelial cell proliferation                       | GO_BiologicalProcess-EBI-UniProt-GOA-ACAP-ARAP_08.05.2020_00h00 | 0,003633375 | 0,00934715  | 2,73016E-08 | 1,5187E-07 | [4]                                 | Group176 | 6,79 | 11,00 |
| GO:0008284 | positive regulation of cell population proliferation | GO_BiologicalProcess-EBI-UniProt-GOA-ACAP-ARAP_08.05.2020_00h00 | 8,18119E-08 | 1,37358E-06 | 2,73016E-08 | 1,5187E-07 | [3, 4, 5]                           | Group176 | 5,61 | 55,00 |
| GO:0046620 | regulation of organ growth                           | GO_BiologicalProcess-EBI-UniProt-GOA-ACAP-ARAP_08.05.2020_00h00 | 0,024403341 | 0,039853238 | 2,73016E-08 | 1,5187E-07 | [3, 4, 5]                           | Group176 | 6,42 | 7,00  |
| GO:0048659 | smooth muscle cell proliferation                     | GO_BiologicalProcess-EBI-UniProt-GOA-ACAP-ARAP_08.05.2020_00h00 | 0,000131848 | 0,000764721 | 2,73016E-08 | 1,5187E-07 | [4]                                 | Group176 | 8,84 | 13,00 |
| GO:0001655 | urogenital system development                        | GO_BiologicalProcess-EBI-UniProt-GOA-ACAP-ARAP_08.05.2020_00h00 | 0,00374708  | 0,009486654 | 2,73016E-08 | 1,5187E-07 | [4, 5]                              | Group176 | 5,19 | 19,00 |
| GO:0048660 | regulation of smooth muscle cell proliferation       | GO_BiologicalProcess-EBI-UniProt-GOA-ACAP-ARAP_08.05.2020_00h00 | 0,000114782 | 0,000695231 | 2,73016E-08 | 1,5187E-07 | [4, 5]                              | Group176 | 8,97 | 13,00 |
| GO:0050678 | regulation of epithelial cell proliferation          | GO_BiologicalProcess-EBI-UniProt-GOA-ACAP-ARAP_08.05.2020_00h00 | 4,34628E-05 | 0,000310403 | 2,73016E-08 | 1,5187E-07 | [4, 5]                              | Group176 | 6,50 | 24,00 |

|            |                                                         |                                                                 |             |             |             |            |                 |          |       |        |
|------------|---------------------------------------------------------|-----------------------------------------------------------------|-------------|-------------|-------------|------------|-----------------|----------|-------|--------|
| GO:0048661 | positive regulation of smooth muscle cell proliferation | GO_BiologicalProcess-EBI-UniProt-GOA-ACAP-ARAP_08.05.2020_00h00 | 0,00013222  | 0,000762259 | 2,73016E-08 | 1,5187E-07 | [4, 5, 6]       | Group176 | 10,99 | 10,00  |
| GO:0050679 | positive regulation of epithelial cell proliferation    | GO_BiologicalProcess-EBI-UniProt-GOA-ACAP-ARAP_08.05.2020_00h00 | 0,00018895  | 0,000982745 | 2,73016E-08 | 1,5187E-07 | [4, 5, 6]       | Group176 | 7,41  | 16,00  |
| GO:0072001 | renal system development                                | GO_BiologicalProcess-EBI-UniProt-GOA-ACAP-ARAP_08.05.2020_00h00 | 0,010179704 | 0,02081619  | 2,73016E-08 | 1,5187E-07 | [4, 5, 6]       | Group176 | 5,02  | 16,00  |
| GO:1990874 | vascular smooth muscle cell proliferation               | GO_BiologicalProcess-EBI-UniProt-GOA-ACAP-ARAP_08.05.2020_00h00 | 0,003044682 | 0,008138997 | 2,73016E-08 | 1,5187E-07 | [5]             | Group176 | 10,91 | 6,00   |
| GO:0001822 | kidney development                                      | GO_BiologicalProcess-EBI-UniProt-GOA-ACAP-ARAP_08.05.2020_00h00 | 0,032703687 | 0,049209792 | 2,73016E-08 | 1,5187E-07 | [4, 5, 6, 7]    | Group176 | 4,55  | 14,00  |
| GO:0001936 | regulation of endothelial cell proliferation            | GO_BiologicalProcess-EBI-UniProt-GOA-ACAP-ARAP_08.05.2020_00h00 | 0,014143549 | 0,026282284 | 2,73016E-08 | 1,5187E-07 | [5, 6]          | Group176 | 6,21  | 9,00   |
| GO:1904705 | regulation of vascular smooth muscle cell proliferation | GO_BiologicalProcess-EBI-UniProt-GOA-ACAP-ARAP_08.05.2020_00h00 | 0,003044682 | 0,008138997 | 2,73016E-08 | 1,5187E-07 | [5, 6]          | Group176 | 10,91 | 6,00   |
| GO:0001938 | positive regulation of endothelial cell proliferation   | GO_BiologicalProcess-EBI-UniProt-GOA-ACAP-ARAP_08.05.2020_00h00 | 0,02131371  | 0,036101274 | 2,73016E-08 | 1,5187E-07 | [5, 6, 7]       | Group176 | 6,60  | 7,00   |
| GO:0055024 | regulation of cardiac muscle tissue development         | GO_BiologicalProcess-EBI-UniProt-GOA-ACAP-ARAP_08.05.2020_00h00 | 0,008760029 | 0,018588355 | 2,73016E-08 | 1,5187E-07 | [5, 6, 7, 8, 9] | Group176 | 7,87  | 7,00   |
| GO:0033554 | cellular response to stress                             | GO_BiologicalProcess-EBI-UniProt-GOA-ACAP-ARAP_08.05.2020_00h00 | 1,66634E-08 | 3,98672E-07 | 3,63422E-08 | 1,9026E-07 | [3]             | Group141 | 4,55  | 100,00 |
| GO:0006974 | cellular response to DNA damage stimulus                | GO_BiologicalProcess-EBI-UniProt-GOA-ACAP-ARAP_08.05.2020_00h00 | 0,001050609 | 0,003642874 | 3,63422E-08 | 1,9026E-07 | [4]             | Group141 | 4,38  | 40,00  |
| GO:0000075 | cell cycle checkpoint                                   | GO_BiologicalProcess-EBI-UniProt-GOA-ACAP-ARAP_08.05.2020_00h00 | 0,003692508 | 0,00942328  | 3,63422E-08 | 1,9026E-07 | [2, 4, 5, 6]    | Group141 | 5,96  | 14,00  |
| GO:0042770 | signal transduction in response to DNA damage           | GO_BiologicalProcess-EBI-UniProt-GOA-ACAP-ARAP_08.05.2020_00h00 | 0,001526183 | 0,004951043 | 3,63422E-08 | 1,9026E-07 | [4, 5, 6]       | Group141 | 7,59  | 11,00  |
| GO:0072331 | signal transduction by p53 class mediator               | GO_BiologicalProcess-EBI-UniProt-GOA-ACAP-ARAP_08.05.2020_00h00 | 0,010597887 | 0,021351954 | 3,63422E-08 | 1,9026E-07 | [4, 5, 6]       | Group141 | 5,12  | 15,00  |
| GO:2001020 | regulation of response to DNA damage stimulus           | GO_BiologicalProcess-EBI-UniProt-GOA-ACAP-ARAP_08.05.2020_00h00 | 0,004286675 | 0,010465174 | 3,63422E-08 | 1,9026E-07 | [4, 5, 6]       | Group141 | 5,86  | 14,00  |
| GO:0000077 | DNA damage checkpoint                                   | GO_BiologicalProcess-EBI-UniProt-GOA-ACAP-ARAP_08.05.2020_00h00 | 0,003633375 | 0,00934715  | 3,63422E-08 | 1,9026E-07 | [4, 5, 6, 7, 8] | Group141 | 6,79  | 11,00  |
| GO:0009611 | response to wounding                                    | GO_BiologicalProcess-EBI-UniProt-GOA-ACAP-ARAP_08.05.2020_00h00 | 2,09631E-06 | 2,33275E-05 | 3,54375E-08 | 1,9115E-07 | [3]             | Group165 | 5,69  | 42,00  |
| GO:0050878 | regulation of body fluid levels                         | GO_BiologicalProcess-EBI-UniProt-GOA-ACAP-ARAP_08.05.2020_00h00 | 0,001702964 | 0,005378668 | 3,54375E-08 | 1,9115E-07 | [3]             | Group165 | 4,84  | 27,00  |
| GO:0007599 | hemostasis                                              | GO_BiologicalProcess-EBI-UniProt-GOA-ACAP-ARAP_08.05.2020_00h00 | 0,001814493 | 0,00563789  | 3,54375E-08 | 1,9115E-07 | [4]             | Group165 | 5,42  | 20,00  |
| GO:0042060 | wound healing                                           | GO_BiologicalProcess-EBI-UniProt-GOA-ACAP-ARAP_08.05.2020_00h00 | 7,38149E-05 | 0,000477303 | 3,54375E-08 | 1,9115E-07 | [4]             | Group165 | 5,40  | 33,00  |
| GO:0033628 | regulation of cell adhesion mediated by integrin        | GO_BiologicalProcess-EBI-UniProt-GOA-ACAP-ARAP_08.05.2020_00h00 | 0,009662041 | 0,020057641 | 3,54375E-08 | 1,9115E-07 | [4, 5]          | Group165 | 10,00 | 5,00   |
| GO:0051604 | protein maturation                                      | GO_BiologicalProcess-EBI-UniProt-GOA-ACAP-ARAP_08.05.2020_00h00 | 0,029049521 | 0,045351375 | 3,54375E-08 | 1,9115E-07 | [4, 5]          | Group165 | 4,62  | 14,00  |
| GO:1903034 | regulation of response to wounding                      | GO_BiologicalProcess-EBI-UniProt-GOA-ACAP-ARAP_08.05.2020_00h00 | 0,000707064 | 0,00271751  | 3,54375E-08 | 1,9115E-07 | [4, 5]          | Group165 | 7,11  | 14,00  |

|            |                                                                                        |                                                                 |             |             |             |            |                       |          |       |        |
|------------|----------------------------------------------------------------------------------------|-----------------------------------------------------------------|-------------|-------------|-------------|------------|-----------------------|----------|-------|--------|
| GO:1903035 | negative regulation of response to wounding                                            | GO_BiologicalProcess-EBI-UniProt-GOA-ACAP-ARAP_08.05.2020_00h00 | 0,005007775 | 0,011891912 | 3,54375E-08 | 1,9115E-07 | [3, 4, 5, 6]          | Group165 | 7,92  | 8,00   |
| GO:0030193 | regulation of blood coagulation                                                        | GO_BiologicalProcess-EBI-UniProt-GOA-ACAP-ARAP_08.05.2020_00h00 | 0,000625023 | 0,002481938 | 3,54375E-08 | 1,9115E-07 | [3, 4, 5, 6, 7]       | Group165 | 9,89  | 9,00   |
| GO:0014909 | smooth muscle cell migration                                                           | GO_BiologicalProcess-EBI-UniProt-GOA-ACAP-ARAP_08.05.2020_00h00 | 0,000144714 | 0,000819473 | 3,54375E-08 | 1,9115E-07 | [5, 6]                | Group165 | 12,00 | 9,00   |
| GO:0061041 | regulation of wound healing                                                            | GO_BiologicalProcess-EBI-UniProt-GOA-ACAP-ARAP_08.05.2020_00h00 | 0,001230309 | 0,004145795 | 3,54375E-08 | 1,9115E-07 | [5, 6]                | Group165 | 7,36  | 12,00  |
| GO:0042730 | fibrinolysis                                                                           | GO_BiologicalProcess-EBI-UniProt-GOA-ACAP-ARAP_08.05.2020_00h00 | 0,007393209 | 0,016265061 | 3,54375E-08 | 1,9115E-07 | [4, 5, 6, 7, 8, 9]    | Group165 | 13,33 | 4,00   |
| GO:0031639 | plasminogen activation                                                                 | GO_BiologicalProcess-EBI-UniProt-GOA-ACAP-ARAP_08.05.2020_00h00 | 0,003242962 | 0,008549627 | 3,54375E-08 | 1,9115E-07 | [7, 8]                | Group165 | 16,67 | 4,00   |
| GO:0044087 | regulation of cellular component biogenesis                                            | GO_BiologicalProcess-EBI-UniProt-GOA-ACAP-ARAP_08.05.2020_00h00 | 0,003717563 | 0,00943689  | 8,61421E-08 | 4,3809E-07 | [3, 4]                | Group150 | 4,03  | 42,00  |
| GO:0051128 | regulation of cellular component organization                                          | GO_BiologicalProcess-EBI-UniProt-GOA-ACAP-ARAP_08.05.2020_00h00 | 9,5472E-08  | 1,54859E-06 | 8,61421E-08 | 4,3809E-07 | [3, 4]                | Group150 | 4,27  | 109,00 |
| GO:0044089 | positive regulation of cellular component biogenesis                                   | GO_BiologicalProcess-EBI-UniProt-GOA-ACAP-ARAP_08.05.2020_00h00 | 0,006975319 | 0,01552414  | 8,61421E-08 | 4,3809E-07 | [3, 4, 5]             | Group150 | 4,41  | 26,00  |
| GO:0051130 | positive regulation of cellular component organization                                 | GO_BiologicalProcess-EBI-UniProt-GOA-ACAP-ARAP_08.05.2020_00h00 | 7,13305E-08 | 1,24115E-06 | 8,61421E-08 | 4,3809E-07 | [3, 4, 5]             | Group150 | 5,15  | 67,00  |
| GO:0031344 | regulation of cell projection organization                                             | GO_BiologicalProcess-EBI-UniProt-GOA-ACAP-ARAP_08.05.2020_00h00 | 0,004833171 | 0,011592343 | 8,61421E-08 | 4,3809E-07 | [4, 5]                | Group150 | 4,26  | 32,00  |
| GO:0033043 | regulation of organelle organization                                                   | GO_BiologicalProcess-EBI-UniProt-GOA-ACAP-ARAP_08.05.2020_00h00 | 0,000797572 | 0,002958436 | 8,61421E-08 | 4,3809E-07 | [4, 5]                | Group150 | 4,03  | 56,00  |
| GO:0010638 | positive regulation of organelle organization                                          | GO_BiologicalProcess-EBI-UniProt-GOA-ACAP-ARAP_08.05.2020_00h00 | 0,002543105 | 0,007243308 | 8,61421E-08 | 4,3809E-07 | [4, 5, 6]             | Group150 | 4,49  | 31,00  |
| GO:0031346 | positive regulation of cell projection organization                                    | GO_BiologicalProcess-EBI-UniProt-GOA-ACAP-ARAP_08.05.2020_00h00 | 0,009294322 | 0,019420668 | 8,61421E-08 | 4,3809E-07 | [4, 5, 6]             | Group150 | 4,67  | 20,00  |
| GO:0120035 | regulation of plasma membrane bounded cell projection organization                     | GO_BiologicalProcess-EBI-UniProt-GOA-ACAP-ARAP_08.05.2020_00h00 | 0,012516662 | 0,024396019 | 8,61421E-08 | 4,3809E-07 | [5, 6]                | Group150 | 4,04  | 30,00  |
| GO:0090287 | regulation of cellular response to growth factor stimulus                              | GO_BiologicalProcess-EBI-UniProt-GOA-ACAP-ARAP_08.05.2020_00h00 | 0,00110216  | 0,003767027 | 9,16346E-08 | 4,5308E-07 | [3, 4, 6]             | Group169 | 5,94  | 18,00  |
| GO:0032633 | interleukin-4 production                                                               | GO_BiologicalProcess-EBI-UniProt-GOA-ACAP-ARAP_08.05.2020_00h00 | 0,002621352 | 0,007400101 | 9,16346E-08 | 4,5308E-07 | [3, 6]                | Group169 | 13,51 | 5,00   |
| GO:0003170 | heart valve development                                                                | GO_BiologicalProcess-EBI-UniProt-GOA-ACAP-ARAP_08.05.2020_00h00 | 0,029100992 | 0,045283981 | 9,16346E-08 | 4,5308E-07 | [3, 5, 6, 7]          | Group169 | 7,58  | 5,00   |
| GO:0001890 | placenta development                                                                   | GO_BiologicalProcess-EBI-UniProt-GOA-ACAP-ARAP_08.05.2020_00h00 | 0,00194322  | 0,005960454 | 9,16346E-08 | 4,5308E-07 | [4, 5, 6, 7]          | Group169 | 6,98  | 12,00  |
| GO:0001892 | embryonic placenta development                                                         | GO_BiologicalProcess-EBI-UniProt-GOA-ACAP-ARAP_08.05.2020_00h00 | 0,017631847 | 0,031363714 | 9,16346E-08 | 4,5308E-07 | [3, 4, 5, 6, 7, 8]    | Group169 | 6,86  | 7,00   |
| GO:0002011 | morphogenesis of an epithelial sheet                                                   | GO_BiologicalProcess-EBI-UniProt-GOA-ACAP-ARAP_08.05.2020_00h00 | 0,000160526 | 0,000882894 | 9,16346E-08 | 4,5308E-07 | [5, 6]                | Group169 | 13,33 | 8,00   |
| GO:0060674 | placenta blood vessel development                                                      | GO_BiologicalProcess-EBI-UniProt-GOA-ACAP-ARAP_08.05.2020_00h00 | 0,003317585 | 0,008674669 | 9,16346E-08 | 4,5308E-07 | [3, 4, 5, 6, 7, 8, 9] | Group169 | 12,82 | 5,00   |
| GO:0090092 | regulation of transmembrane receptor protein serine/threonine kinase signaling pathway | GO_BiologicalProcess-EBI-UniProt-GOA-ACAP-ARAP_08.05.2020_00h00 | 0,018717377 | 0,032806829 | 9,16346E-08 | 4,5308E-07 | [4, 5, 6, 7, 8]       | Group169 | 5,04  | 13,00  |



|            |                                                                              |                                                                 |             |             |             |            |                        |          |       |       |
|------------|------------------------------------------------------------------------------|-----------------------------------------------------------------|-------------|-------------|-------------|------------|------------------------|----------|-------|-------|
| GO:1903556 | negative regulation of tumor necrosis factor superfamily cytokine production | GO_BiologicalProcess-EBI-UniProt-GOA-ACAP-ARAP_08.05.2020_00h00 | 0,029100992 | 0,045283981 | 9,16346E-08 | 4,5308E-07 | [4, 5, 6, 7, 8]        | Group169 | 7,58  | 5,00  |
| GO:0030510 | regulation of BMP signaling pathway                                          | GO_BiologicalProcess-EBI-UniProt-GOA-ACAP-ARAP_08.05.2020_00h00 | 0,013690378 | 0,025892671 | 9,16346E-08 | 4,5308E-07 | [4, 5, 6, 7, 8, 9]     | Group169 | 7,22  | 7,00  |
| GO:0072602 | interleukin-4 secretion                                                      | GO_BiologicalProcess-EBI-UniProt-GOA-ACAP-ARAP_08.05.2020_00h00 | 0,000575675 | 0,002344345 | 9,16346E-08 | 4,5308E-07 | [4, 5, 6, 7, 8, 9, 10] | Group169 | 42,86 | 3,00  |
| GO:0097028 | dendritic cell differentiation                                               | GO_BiologicalProcess-EBI-UniProt-GOA-ACAP-ARAP_08.05.2020_00h00 | 0,029624119 | 0,045948595 | 9,16346E-08 | 4,5308E-07 | [5, 6, 7, 8, 9]        | Group169 | 8,89  | 4,00  |
| GO:0030513 | positive regulation of BMP signaling pathway                                 | GO_BiologicalProcess-EBI-UniProt-GOA-ACAP-ARAP_08.05.2020_00h00 | 0,016912684 | 0,030253155 | 9,16346E-08 | 4,5308E-07 | [5, 6, 7, 8, 9, 10]    | Group169 | 10,53 | 4,00  |
| GO:2000725 | regulation of cardiac muscle cell differentiation                            | GO_BiologicalProcess-EBI-UniProt-GOA-ACAP-ARAP_08.05.2020_00h00 | 0,020105848 | 0,034731582 | 9,16346E-08 | 4,5308E-07 | [5, 6, 7, 8, 9, 10]    | Group169 | 10,00 | 4,00  |
| GO:0034097 | response to cytokine                                                         | GO_BiologicalProcess-EBI-UniProt-GOA-ACAP-ARAP_08.05.2020_00h00 | 2,97291E-07 | 4,31072E-06 | 1,8928E-07  | 9,1059E-07 | [4]                    | Group115 | 5,05  | 64,00 |
| GO:0070555 | response to interleukin-1                                                    | GO_BiologicalProcess-EBI-UniProt-GOA-ACAP-ARAP_08.05.2020_00h00 | 1,33456E-05 | 0,000114034 | 1,8928E-07  | 9,1059E-07 | [5]                    | Group115 | 8,45  | 18,00 |
| GO:1904019 | epithelial cell apoptotic process                                            | GO_BiologicalProcess-EBI-UniProt-GOA-ACAP-ARAP_08.05.2020_00h00 | 3,38977E-05 | 0,000249539 | 1,8928E-07  | 9,1059E-07 | [5]                    | Group115 | 10,81 | 12,00 |
| GO:0071347 | cellular response to interleukin-1                                           | GO_BiologicalProcess-EBI-UniProt-GOA-ACAP-ARAP_08.05.2020_00h00 | 0,000117157 | 0,000700744 | 1,8928E-07  | 9,1059E-07 | [6]                    | Group115 | 8,06  | 15,00 |
| GO:0071356 | cellular response to tumor necrosis factor                                   | GO_BiologicalProcess-EBI-UniProt-GOA-ACAP-ARAP_08.05.2020_00h00 | 0,012930495 | 0,024948554 | 1,8928E-07  | 9,1059E-07 | [6]                    | Group115 | 5,00  | 15,00 |
| GO:0071222 | cellular response to lipopolysaccharide                                      | GO_BiologicalProcess-EBI-UniProt-GOA-ACAP-ARAP_08.05.2020_00h00 | 0,006491162 | 0,014651042 | 1,8928E-07  | 9,1059E-07 | [5, 6, 8]              | Group115 | 5,78  | 13,00 |
| GO:0043491 | protein kinase B signaling                                                   | GO_BiologicalProcess-EBI-UniProt-GOA-ACAP-ARAP_08.05.2020_00h00 | 7,17147E-05 | 0,000466877 | 4,96615E-07 | 2,3262E-06 | [4, 5, 6]              | Group172 | 7,20  | 19,00 |
| GO:1901888 | regulation of cell junction assembly                                         | GO_BiologicalProcess-EBI-UniProt-GOA-ACAP-ARAP_08.05.2020_00h00 | 0,029677309 | 0,045956612 | 4,96615E-07 | 2,3262E-06 | [4, 5, 6]              | Group172 | 5,02  | 11,00 |
| GO:0051896 | regulation of protein kinase B signaling                                     | GO_BiologicalProcess-EBI-UniProt-GOA-ACAP-ARAP_08.05.2020_00h00 | 0,000195626 | 0,001011969 | 4,96615E-07 | 2,3262E-06 | [5, 6, 7]              | Group172 | 7,11  | 17,00 |
| GO:0051897 | positive regulation of protein kinase B signaling                            | GO_BiologicalProcess-EBI-UniProt-GOA-ACAP-ARAP_08.05.2020_00h00 | 8,10058E-05 | 0,000506683 | 4,96615E-07 | 2,3262E-06 | [5, 6, 7, 8]           | Group172 | 8,33  | 15,00 |
| GO:0043549 | regulation of kinase activity                                                | GO_BiologicalProcess-EBI-UniProt-GOA-ACAP-ARAP_08.05.2020_00h00 | 1,8027E-06  | 2,05379E-05 | 4,96615E-07 | 2,3262E-06 | [5, 7, 8]              | Group172 | 5,25  | 51,00 |
| GO:0042327 | positive regulation of phosphorylation                                       | GO_BiologicalProcess-EBI-UniProt-GOA-ACAP-ARAP_08.05.2020_00h00 | 3,4551E-08  | 6,74801E-07 | 4,96615E-07 | 2,3262E-06 | [6, 7, 8]              | Group172 | 5,40  | 63,00 |
| GO:0004707 | MAP kinase activity                                                          | GO_BiologicalProcess-EBI-UniProt-GOA-ACAP-ARAP_08.05.2020_00h00 | 0,004993279 | 0,011916628 | 4,96615E-07 | 2,3262E-06 | [5, 6, 7, 9, 10]       | Group172 | 5,05  | 19,00 |
| GO:0004672 | protein kinase activity                                                      | GO_BiologicalProcess-EBI-UniProt-GOA-ACAP-ARAP_08.05.2020_00h00 | 4,63941E-05 | 0,000324081 | 4,96615E-07 | 2,3262E-06 | [7, 8]                 | Group172 | 4,46  | 58,00 |
| GO:0018212 | peptidyl-tyrosine modification                                               | GO_BiologicalProcess-EBI-UniProt-GOA-ACAP-ARAP_08.05.2020_00h00 | 0,00348192  | 0,00900594  | 4,96615E-07 | 2,3262E-06 | [7, 8]                 | Group172 | 5,02  | 21,00 |
| GO:0033674 | positive regulation of kinase activity                                       | GO_BiologicalProcess-EBI-UniProt-GOA-ACAP-ARAP_08.05.2020_00h00 | 1,62283E-05 | 0,000136232 | 4,96615E-07 | 2,3262E-06 | [6, 7, 8, 9]           | Group172 | 5,53  | 37,00 |
| GO:0043408 | regulation of MAPK cascade                                                   | GO_BiologicalProcess-EBI-UniProt-GOA-ACAP-ARAP_08.05.2020_00h00 | 3,12878E-06 | 3,36432E-05 | 4,96615E-07 | 2,3262E-06 | [5, 6, 7, 8, 9, 10]    | Group172 | 5,54  | 43,00 |

|            |                                                   |                                                                 |             |             |             |            |                            |          |       |       |
|------------|---------------------------------------------------|-----------------------------------------------------------------|-------------|-------------|-------------|------------|----------------------------|----------|-------|-------|
| GO:0043410 | positive regulation of MAPK cascade               | GO_BiologicalProcess-EBI-UniProt-GOA-ACAP-ARAP_08.05.2020_00h00 | 2,28998E-07 | 3,37156E-06 | 4,96615E-07 | 2,3262E-06 | [5, 6, 7, 8, 9, 10, 11]    | Group172 | 6,54  | 38,00 |
| GO:0019199 | transmembrane receptor protein kinase activity    | GO_BiologicalProcess-EBI-UniProt-GOA-ACAP-ARAP_08.05.2020_00h00 | 0,003846464 | 0,009687016 | 4,96615E-07 | 2,3262E-06 | [8, 9]                     | Group172 | 7,63  | 9,00  |
| GO:0043405 | regulation of MAP kinase activity                 | GO_BiologicalProcess-EBI-UniProt-GOA-ACAP-ARAP_08.05.2020_00h00 | 0,00374708  | 0,009486654 | 4,96615E-07 | 2,3262E-06 | [6, 7, 8, 9, 10, 11]       | Group172 | 5,19  | 19,00 |
| GO:0004713 | protein tyrosine kinase activity                  | GO_BiologicalProcess-EBI-UniProt-GOA-ACAP-ARAP_08.05.2020_00h00 | 0,017674305 | 0,031322796 | 4,96615E-07 | 2,3262E-06 | [8, 9, 10]                 | Group172 | 5,08  | 13,00 |
| GO:0032147 | activation of protein kinase activity             | GO_BiologicalProcess-EBI-UniProt-GOA-ACAP-ARAP_08.05.2020_00h00 | 2,21901E-05 | 0,000176966 | 4,96615E-07 | 2,3262E-06 | [8, 9, 10, 11]             | Group172 | 6,48  | 26,00 |
| GO:0031098 | stress-activated protein kinase signaling cascade | GO_BiologicalProcess-EBI-UniProt-GOA-ACAP-ARAP_08.05.2020_00h00 | 0,011678319 | 0,023091221 | 7,73732E-07 | 3,5314E-06 | [4, 5, 6]                  | Group132 | 4,94  | 16,00 |
| GO:0023014 | signal transduction by protein phosphorylation    | GO_BiologicalProcess-EBI-UniProt-GOA-ACAP-ARAP_08.05.2020_00h00 | 6,64101E-07 | 8,58844E-06 | 7,73732E-07 | 3,5314E-06 | [3, 4, 5, 7, 8]            | Group132 | 5,34  | 53,00 |
| GO:0000165 | MAPK cascade                                      | GO_BiologicalProcess-EBI-UniProt-GOA-ACAP-ARAP_08.05.2020_00h00 | 1,91283E-06 | 2,15362E-05 | 7,73732E-07 | 3,5314E-06 | [4, 5, 6, 8, 9]            | Group132 | 5,24  | 51,00 |
| GO:0043408 | regulation of MAPK cascade                        | GO_BiologicalProcess-EBI-UniProt-GOA-ACAP-ARAP_08.05.2020_00h00 | 3,12878E-06 | 3,36432E-05 | 7,73732E-07 | 3,5314E-06 | [5, 6, 7, 8, 9, 10]        | Group132 | 5,54  | 43,00 |
| GO:0043410 | positive regulation of MAPK cascade               | GO_BiologicalProcess-EBI-UniProt-GOA-ACAP-ARAP_08.05.2020_00h00 | 2,28998E-07 | 3,37156E-06 | 7,73732E-07 | 3,5314E-06 | [5, 6, 7, 8, 9, 10, 11]    | Group132 | 6,54  | 38,00 |
| GO:0007254 | JNK cascade                                       | GO_BiologicalProcess-EBI-UniProt-GOA-ACAP-ARAP_08.05.2020_00h00 | 0,030536547 | 0,046832494 | 7,73732E-07 | 3,5314E-06 | [6, 7, 8, 10, 11]          | Group132 | 5,00  | 11,00 |
| GO:0001776 | leukocyte homeostasis                             | GO_BiologicalProcess-EBI-UniProt-GOA-ACAP-ARAP_08.05.2020_00h00 | 0,015182317 | 0,02772801  | 8,12637E-07 | 3,6162E-06 | [2, 5]                     | Group136 | 7,07  | 7,00  |
| GO:0002262 | myeloid cell homeostasis                          | GO_BiologicalProcess-EBI-UniProt-GOA-ACAP-ARAP_08.05.2020_00h00 | 0,000130379 | 0,000760808 | 8,12637E-07 | 3,6162E-06 | [2, 5]                     | Group136 | 8,38  | 14,00 |
| GO:0048872 | homeostasis of number of cells                    | GO_BiologicalProcess-EBI-UniProt-GOA-ACAP-ARAP_08.05.2020_00h00 | 0,00023294  | 0,001161058 | 8,12637E-07 | 3,6162E-06 | [4]                        | Group136 | 6,57  | 19,00 |
| GO:0034101 | erythrocyte homeostasis                           | GO_BiologicalProcess-EBI-UniProt-GOA-ACAP-ARAP_08.05.2020_00h00 | 0,000242113 | 0,00120053  | 8,12637E-07 | 3,6162E-06 | [3, 6]                     | Group136 | 8,82  | 12,00 |
| GO:0030099 | myeloid cell differentiation                      | GO_BiologicalProcess-EBI-UniProt-GOA-ACAP-ARAP_08.05.2020_00h00 | 6,2456E-06  | 5,97704E-05 | 8,12637E-07 | 3,6162E-06 | [4, 5, 6, 7, 8]            | Group136 | 6,55  | 29,00 |
| GO:0030218 | erythrocyte differentiation                       | GO_BiologicalProcess-EBI-UniProt-GOA-ACAP-ARAP_08.05.2020_00h00 | 0,001763233 | 0,005550702 | 8,12637E-07 | 3,6162E-06 | [4, 5, 6, 7, 8, 9]         | Group136 | 7,94  | 10,00 |
| GO:0043249 | erythrocyte maturation                            | GO_BiologicalProcess-EBI-UniProt-GOA-ACAP-ARAP_08.05.2020_00h00 | 0,012620698 | 0,024499003 | 8,12637E-07 | 3,6162E-06 | [4, 5, 6, 7, 8, 9, 10, 11] | Group136 | 15,79 | 3,00  |
| GO:0042592 | homeostatic process                               | GO_BiologicalProcess-EBI-UniProt-GOA-ACAP-ARAP_08.05.2020_00h00 | 9,1536E-07  | 1,12308E-05 | 9,1536E-07  | 3,974E-06  | [3]                        | Group097 | 4,32  | 91,00 |
| GO:0048871 | multicellular organismal homeostasis              | GO_BiologicalProcess-EBI-UniProt-GOA-ACAP-ARAP_08.05.2020_00h00 | 0,002410506 | 0,006969347 | 9,1536E-07  | 3,974E-06  | [2, 4]                     | Group097 | 4,72  | 27,00 |
| GO:0001894 | tissue homeostasis                                | GO_BiologicalProcess-EBI-UniProt-GOA-ACAP-ARAP_08.05.2020_00h00 | 0,023241255 | 0,038480762 | 9,1536E-07  | 3,974E-06  | [3, 5]                     | Group097 | 4,76  | 14,00 |
| GO:0060249 | anatomical structure homeostasis                  | GO_BiologicalProcess-EBI-UniProt-GOA-ACAP-ARAP_08.05.2020_00h00 | 0,020128882 | 0,03470872  | 9,1536E-07  | 3,974E-06  | [4]                        | Group097 | 4,21  | 22,00 |
| GO:0035633 | maintenance of blood-brain barrier                | GO_BiologicalProcess-EBI-UniProt-GOA-ACAP-ARAP_08.05.2020_00h00 | 0,000421301 | 0,001849472 | 9,1536E-07  | 3,974E-06  | [4, 6]                     | Group097 | 15,79 | 6,00  |
| GO:0019725 | cellular homeostasis                              | GO_BiologicalProcess-EBI-UniProt-GOA-ACAP-ARAP_08.05.2020_00h00 | 4,43303E-05 | 0,000311942 | 9,1536E-07  | 3,974E-06  | [2, 4]                     | Group149 | 4,70  | 50,00 |

|            |                                                     |                                                                 |             |             |             |            |                    |          |      |       |
|------------|-----------------------------------------------------|-----------------------------------------------------------------|-------------|-------------|-------------|------------|--------------------|----------|------|-------|
| GO:0042592 | homeostatic process                                 | GO_BiologicalProcess-EBI-UniProt-GOA-ACAP-ARAP_08.05.2020_00h00 | 9,1536E-07  | 1,12308E-05 | 9,1536E-07  | 3,974E-06  | [3]                | Group149 | 4,32 | 91,00 |
| GO:0048871 | multicellular organismal homeostasis                | GO_BiologicalProcess-EBI-UniProt-GOA-ACAP-ARAP_08.05.2020_00h00 | 0,002410506 | 0,006969347 | 9,1536E-07  | 3,974E-06  | [2, 4]             | Group149 | 4,72 | 27,00 |
| GO:0048878 | chemical homeostasis                                | GO_BiologicalProcess-EBI-UniProt-GOA-ACAP-ARAP_08.05.2020_00h00 | 0,000636798 | 0,002507882 | 9,1536E-07  | 3,974E-06  | [4]                | Group149 | 4,13 | 53,00 |
| GO:0055082 | cellular chemical homeostasis                       | GO_BiologicalProcess-EBI-UniProt-GOA-ACAP-ARAP_08.05.2020_00h00 | 2,01483E-05 | 0,000163406 | 9,1536E-07  | 3,974E-06  | [3, 5]             | Group149 | 5,04 | 45,00 |
| GO:0030003 | cellular cation homeostasis                         | GO_BiologicalProcess-EBI-UniProt-GOA-ACAP-ARAP_08.05.2020_00h00 | 2,90438E-05 | 0,000224153 | 9,1536E-07  | 3,974E-06  | [5, 7]             | Group149 | 5,32 | 38,00 |
| GO:0098771 | inorganic ion homeostasis                           | GO_BiologicalProcess-EBI-UniProt-GOA-ACAP-ARAP_08.05.2020_00h00 | 0,000333665 | 0,001557644 | 9,1536E-07  | 3,974E-06  | [6]                | Group149 | 4,73 | 38,00 |
| GO:0006875 | cellular metal ion homeostasis                      | GO_BiologicalProcess-EBI-UniProt-GOA-ACAP-ARAP_08.05.2020_00h00 | 0,000161235 | 0,000881727 | 9,1536E-07  | 3,974E-06  | [6, 8]             | Group149 | 5,18 | 33,00 |
| GO:0006874 | cellular calcium ion homeostasis                    | GO_BiologicalProcess-EBI-UniProt-GOA-ACAP-ARAP_08.05.2020_00h00 | 6,50747E-05 | 0,000426551 | 9,1536E-07  | 3,974E-06  | [7, 9]             | Group149 | 5,77 | 29,00 |
| GO:0045321 | leukocyte activation                                | GO_BiologicalProcess-EBI-UniProt-GOA-ACAP-ARAP_08.05.2020_00h00 | 7,48312E-05 | 0,000477423 | 9,40576E-07 | 3,9863E-06 | [2, 3]             | Group178 | 4,32 | 61,00 |
| GO:0002263 | cell activation involved in immune response         | GO_BiologicalProcess-EBI-UniProt-GOA-ACAP-ARAP_08.05.2020_00h00 | 1,98211E-05 | 0,000163524 | 9,40576E-07 | 3,9863E-06 | [3]                | Group178 | 5,24 | 41,00 |
| GO:0140352 | export from cell                                    | GO_BiologicalProcess-EBI-UniProt-GOA-ACAP-ARAP_08.05.2020_00h00 | 9,53733E-05 | 0,000588853 | 9,40576E-07 | 3,9863E-06 | [2, 4]             | Group178 | 4,10 | 71,00 |
| GO:0002274 | myeloid leukocyte activation                        | GO_BiologicalProcess-EBI-UniProt-GOA-ACAP-ARAP_08.05.2020_00h00 | 0,001295747 | 0,004350983 | 9,40576E-07 | 3,9863E-06 | [3, 4]             | Group178 | 4,60 | 33,00 |
| GO:0046649 | lymphocyte activation                               | GO_BiologicalProcess-EBI-UniProt-GOA-ACAP-ARAP_08.05.2020_00h00 | 0,001648926 | 0,0052426   | 9,40576E-07 | 3,9863E-06 | [3, 4]             | Group178 | 4,41 | 36,00 |
| GO:0051049 | regulation of transport                             | GO_BiologicalProcess-EBI-UniProt-GOA-ACAP-ARAP_08.05.2020_00h00 | 6,30185E-05 | 0,00041881  | 9,40576E-07 | 3,9863E-06 | [3, 4]             | Group178 | 4,00 | 81,00 |
| GO:0002520 | immune system development                           | GO_BiologicalProcess-EBI-UniProt-GOA-ACAP-ARAP_08.05.2020_00h00 | 5,84203E-07 | 7,76503E-06 | 9,40576E-07 | 3,9863E-06 | [2, 4, 5]          | Group178 | 5,23 | 56,00 |
| GO:0002444 | myeloid leukocyte mediated immunity                 | GO_BiologicalProcess-EBI-UniProt-GOA-ACAP-ARAP_08.05.2020_00h00 | 0,000784727 | 0,00293353  | 9,40576E-07 | 3,9863E-06 | [4]                | Group178 | 4,90 | 30,00 |
| GO:0002275 | myeloid cell activation involved in immune response | GO_BiologicalProcess-EBI-UniProt-GOA-ACAP-ARAP_08.05.2020_00h00 | 0,001343737 | 0,004480686 | 9,40576E-07 | 3,9863E-06 | [4, 5]             | Group178 | 4,79 | 29,00 |
| GO:0002285 | lymphocyte activation involved in immune response   | GO_BiologicalProcess-EBI-UniProt-GOA-ACAP-ARAP_08.05.2020_00h00 | 0,004762104 | 0,01147943  | 9,40576E-07 | 3,9863E-06 | [4, 5]             | Group178 | 6,25 | 12,00 |
| GO:0006887 | exocytosis                                          | GO_BiologicalProcess-EBI-UniProt-GOA-ACAP-ARAP_08.05.2020_00h00 | 0,000864268 | 0,003132973 | 9,40576E-07 | 3,9863E-06 | [3, 4, 5, 6]       | Group178 | 4,33 | 43,00 |
| GO:0042110 | T cell activation                                   | GO_BiologicalProcess-EBI-UniProt-GOA-ACAP-ARAP_08.05.2020_00h00 | 0,002095667 | 0,006306772 | 9,40576E-07 | 3,9863E-06 | [4, 5]             | Group178 | 4,90 | 25,00 |
| GO:0051249 | regulation of lymphocyte activation                 | GO_BiologicalProcess-EBI-UniProt-GOA-ACAP-ARAP_08.05.2020_00h00 | 0,021119829 | 0,035836305 | 9,40576E-07 | 3,9863E-06 | [4, 5, 6]          | Group178 | 4,14 | 23,00 |
| GO:0030097 | hemopoiesis                                         | GO_BiologicalProcess-EBI-UniProt-GOA-ACAP-ARAP_08.05.2020_00h00 | 2,93906E-05 | 0,000225015 | 9,40576E-07 | 3,9863E-06 | [4, 5, 6, 7]       | Group178 | 4,89 | 47,00 |
| GO:0043299 | leukocyte degranulation                             | GO_BiologicalProcess-EBI-UniProt-GOA-ACAP-ARAP_08.05.2020_00h00 | 0,000458366 | 0,001958285 | 9,40576E-07 | 3,9863E-06 | [3, 4, 5, 6, 7, 8] | Group178 | 5,07 | 30,00 |
| GO:0045055 | regulated exocytosis                                | GO_BiologicalProcess-EBI-UniProt-GOA-ACAP-ARAP_08.05.2020_00h00 | 0,000882685 | 0,00318766  | 9,40576E-07 | 3,9863E-06 | [4, 5, 6, 7]       | Group178 | 4,45 | 39,00 |

|            |                                                                                   |                                                                 |             |             |             |            |                          |          |       |       |
|------------|-----------------------------------------------------------------------------------|-----------------------------------------------------------------|-------------|-------------|-------------|------------|--------------------------|----------|-------|-------|
| GO:0002521 | leukocyte differentiation                                                         | GO_BiologicalProcess-EBI-UniProt-GOA-ACAP-ARAP_08.05.2020_00h00 | 0,00341803  | 0,008912955 | 9,40576E-07 | 3,9863E-06 | [4, 5, 6, 7, 8]          | Group178 | 4,66  | 26,00 |
| GO:0009306 | protein secretion                                                                 | GO_BiologicalProcess-EBI-UniProt-GOA-ACAP-ARAP_08.05.2020_00h00 | 0,017033646 | 0,030412685 | 9,40576E-07 | 3,9863E-06 | [4, 5, 6, 7, 8]          | Group178 | 4,05  | 27,00 |
| GO:0030098 | lymphocyte differentiation                                                        | GO_BiologicalProcess-EBI-UniProt-GOA-ACAP-ARAP_08.05.2020_00h00 | 0,005579029 | 0,013022271 | 9,40576E-07 | 3,9863E-06 | [4, 5, 6, 7, 8, 9]       | Group178 | 5,00  | 19,00 |
| GO:0043312 | neutrophil degranulation                                                          | GO_BiologicalProcess-EBI-UniProt-GOA-ACAP-ARAP_08.05.2020_00h00 | 0,000478491 | 0,00201725  | 9,40576E-07 | 3,9863E-06 | [4, 5, 6, 7, 8, 9]       | Group178 | 5,19  | 28,00 |
| GO:0097190 | apoptotic signaling pathway                                                       | GO_BiologicalProcess-EBI-UniProt-GOA-ACAP-ARAP_08.05.2020_00h00 | 1,38238E-06 | 1,63326E-05 | 9,79782E-07 | 4,0558E-06 | [3, 4, 5]                | Group145 | 6,00  | 39,00 |
| GO:0072331 | signal transduction by p53 class mediator                                         | GO_BiologicalProcess-EBI-UniProt-GOA-ACAP-ARAP_08.05.2020_00h00 | 0,010597887 | 0,021351954 | 9,79782E-07 | 4,0558E-06 | [4, 5, 6]                | Group145 | 5,12  | 15,00 |
| GO:0097193 | intrinsic apoptotic signaling pathway                                             | GO_BiologicalProcess-EBI-UniProt-GOA-ACAP-ARAP_08.05.2020_00h00 | 0,000166499 | 0,000895165 | 9,79782E-07 | 4,0558E-06 | [4, 5, 6]                | Group145 | 6,56  | 20,00 |
| GO:1905897 | regulation of response to endoplasmic reticulum stress                            | GO_BiologicalProcess-EBI-UniProt-GOA-ACAP-ARAP_08.05.2020_00h00 | 0,009845688 | 0,020263061 | 9,79782E-07 | 4,0558E-06 | [4, 5, 6]                | Group145 | 7,69  | 7,00  |
| GO:2001233 | regulation of apoptotic signaling pathway                                         | GO_BiologicalProcess-EBI-UniProt-GOA-ACAP-ARAP_08.05.2020_00h00 | 0,003071183 | 0,008186971 | 9,79782E-07 | 4,0558E-06 | [4, 5, 6, 7]             | Group145 | 4,99  | 22,00 |
| GO:0008630 | intrinsic apoptotic signaling pathway in response to DNA damage                   | GO_BiologicalProcess-EBI-UniProt-GOA-ACAP-ARAP_08.05.2020_00h00 | 0,002549824 | 0,007219472 | 9,79782E-07 | 4,0558E-06 | [5, 6, 7]                | Group145 | 8,11  | 9,00  |
| GO:2001234 | negative regulation of apoptotic signaling pathway                                | GO_BiologicalProcess-EBI-UniProt-GOA-ACAP-ARAP_08.05.2020_00h00 | 0,001539791 | 0,004978311 | 9,79782E-07 | 4,0558E-06 | [4, 5, 6, 7, 8]          | Group145 | 6,11  | 16,00 |
| GO:2001242 | regulation of intrinsic apoptotic signaling pathway                               | GO_BiologicalProcess-EBI-UniProt-GOA-ACAP-ARAP_08.05.2020_00h00 | 0,01703891  | 0,03036543  | 9,79782E-07 | 4,0558E-06 | [5, 6, 7, 8]             | Group145 | 5,71  | 10,00 |
| GO:2001243 | negative regulation of intrinsic apoptotic signaling pathway                      | GO_BiologicalProcess-EBI-UniProt-GOA-ACAP-ARAP_08.05.2020_00h00 | 0,00920515  | 0,019361163 | 9,79782E-07 | 4,0558E-06 | [5, 6, 7, 8, 9]          | Group145 | 7,14  | 8,00  |
| GO:0070482 | response to oxygen levels                                                         | GO_BiologicalProcess-EBI-UniProt-GOA-ACAP-ARAP_08.05.2020_00h00 | 1,73753E-06 | 2,00339E-05 | 1,0316E-06  | 4,1733E-06 | [3]                      | Group099 | 6,99  | 29,00 |
| GO:0001666 | response to hypoxia                                                               | GO_BiologicalProcess-EBI-UniProt-GOA-ACAP-ARAP_08.05.2020_00h00 | 2,00466E-05 | 0,000163971 | 1,0316E-06  | 4,1733E-06 | [3, 5]                   | Group099 | 6,67  | 25,00 |
| GO:0036294 | cellular response to decreased oxygen levels                                      | GO_BiologicalProcess-EBI-UniProt-GOA-ACAP-ARAP_08.05.2020_00h00 | 6,02248E-06 | 5,88114E-05 | 1,0316E-06  | 4,1733E-06 | [5]                      | Group099 | 8,60  | 19,00 |
| GO:0071456 | cellular response to hypoxia                                                      | GO_BiologicalProcess-EBI-UniProt-GOA-ACAP-ARAP_08.05.2020_00h00 | 4,2432E-05  | 0,000307632 | 1,0316E-06  | 4,1733E-06 | [4, 6]                   | Group099 | 8,06  | 17,00 |
| GO:0043618 | regulation of transcription from RNA polymerase II promoter in response to stress | GO_BiologicalProcess-EBI-UniProt-GOA-ACAP-ARAP_08.05.2020_00h00 | 0,016302135 | 0,029436117 | 1,0316E-06  | 4,1733E-06 | [5, 7, 8, 9, 10, 11, 12] | Group099 | 6,45  | 8,00  |
| GO:0001894 | tissue homeostasis                                                                | GO_BiologicalProcess-EBI-UniProt-GOA-ACAP-ARAP_08.05.2020_00h00 | 0,023241255 | 0,038480762 | 1,73712E-06 | 6,8713E-06 | [3, 5]                   | Group159 | 4,76  | 14,00 |
| GO:0043114 | regulation of vascular permeability                                               | GO_BiologicalProcess-EBI-UniProt-GOA-ACAP-ARAP_08.05.2020_00h00 | 0,008146646 | 0,017638776 | 1,73712E-06 | 6,8713E-06 | [3, 5]                   | Group159 | 10,42 | 5,00  |
| GO:0060249 | anatomical structure homeostasis                                                  | GO_BiologicalProcess-EBI-UniProt-GOA-ACAP-ARAP_08.05.2020_00h00 | 0,020128882 | 0,03470872  | 1,73712E-06 | 6,8713E-06 | [4]                      | Group159 | 4,21  | 22,00 |
| GO:0002064 | epithelial cell development                                                       | GO_BiologicalProcess-EBI-UniProt-GOA-ACAP-ARAP_08.05.2020_00h00 | 3,30027E-06 | 3,50928E-05 | 1,73712E-06 | 6,8713E-06 | [4, 5, 6]                | Group159 | 8,62  | 20,00 |
| GO:0003158 | endothelium development                                                           | GO_BiologicalProcess-EBI-UniProt-GOA-ACAP-ARAP_08.05.2020_00h00 | 0,000445457 | 0,001920282 | 1,73712E-06 | 6,8713E-06 | [5]                      | Group159 | 8,80  | 11,00 |

|            |                                                                 |                                                                 |             |             |             |            |                 |          |       |       |
|------------|-----------------------------------------------------------------|-----------------------------------------------------------------|-------------|-------------|-------------|------------|-----------------|----------|-------|-------|
| GO:0035329 | hippo signaling                                                 | GO_BiologicalProcess-EBI-UniProt-GOA-ACAP-ARAP_08.05.2020_00h00 | 0,000833247 | 0,003055238 | 1,73712E-06 | 6,8713E-06 | [4, 5, 6]       | Group159 | 13,95 | 6,00  |
| GO:0035633 | maintenance of blood-brain barrier                              | GO_BiologicalProcess-EBI-UniProt-GOA-ACAP-ARAP_08.05.2020_00h00 | 0,000421301 | 0,001849472 | 1,73712E-06 | 6,8713E-06 | [4, 6]          | Group159 | 15,79 | 6,00  |
| GO:0043116 | negative regulation of vascular permeability                    | GO_BiologicalProcess-EBI-UniProt-GOA-ACAP-ARAP_08.05.2020_00h00 | 0,009205425 | 0,019319279 | 1,73712E-06 | 6,8713E-06 | [4, 6]          | Group159 | 17,65 | 3,00  |
| GO:0043117 | positive regulation of vascular permeability                    | GO_BiologicalProcess-EBI-UniProt-GOA-ACAP-ARAP_08.05.2020_00h00 | 0,007729088 | 0,016887529 | 1,73712E-06 | 6,8713E-06 | [4, 6]          | Group159 | 18,75 | 3,00  |
| GO:0001885 | endothelial cell development                                    | GO_BiologicalProcess-EBI-UniProt-GOA-ACAP-ARAP_08.05.2020_00h00 | 0,000314285 | 0,001481627 | 1,73712E-06 | 6,8713E-06 | [5, 6, 7]       | Group159 | 12,12 | 8,00  |
| GO:0071320 | cellular response to cAMP                                       | GO_BiologicalProcess-EBI-UniProt-GOA-ACAP-ARAP_08.05.2020_00h00 | 0,003981134 | 0,009921734 | 1,73712E-06 | 6,8713E-06 | [5, 6, 7]       | Group159 | 10,34 | 6,00  |
| GO:0051726 | regulation of cell cycle                                        | GO_BiologicalProcess-EBI-UniProt-GOA-ACAP-ARAP_08.05.2020_00h00 | 0,000162478 | 0,000883473 | 2,1903E-06  | 8,4755E-06 | [3, 4]          | Group183 | 4,30  | 56,00 |
| GO:0006974 | cellular response to DNA damage stimulus                        | GO_BiologicalProcess-EBI-UniProt-GOA-ACAP-ARAP_08.05.2020_00h00 | 0,001050609 | 0,003642874 | 2,1903E-06  | 8,4755E-06 | [4]             | Group183 | 4,38  | 40,00 |
| GO:0045786 | negative regulation of cell cycle                               | GO_BiologicalProcess-EBI-UniProt-GOA-ACAP-ARAP_08.05.2020_00h00 | 0,000479548 | 0,002012839 | 2,1903E-06  | 8,4755E-06 | [3, 4, 5]       | Group183 | 4,93  | 32,00 |
| GO:0045787 | positive regulation of cell cycle                               | GO_BiologicalProcess-EBI-UniProt-GOA-ACAP-ARAP_08.05.2020_00h00 | 0,018188933 | 0,032056738 | 2,1903E-06  | 8,4755E-06 | [3, 4, 5]       | Group183 | 4,51  | 18,00 |
| GO:0000075 | cell cycle checkpoint                                           | GO_BiologicalProcess-EBI-UniProt-GOA-ACAP-ARAP_08.05.2020_00h00 | 0,003692508 | 0,00942328  | 2,1903E-06  | 8,4755E-06 | [2, 4, 5, 6]    | Group183 | 5,96  | 14,00 |
| GO:0007050 | cell cycle arrest                                               | GO_BiologicalProcess-EBI-UniProt-GOA-ACAP-ARAP_08.05.2020_00h00 | 1,01457E-05 | 9,07426E-05 | 2,1903E-06  | 8,4755E-06 | [3, 4, 5, 6]    | Group183 | 8,00  | 20,00 |
| GO:0007346 | regulation of mitotic cell cycle                                | GO_BiologicalProcess-EBI-UniProt-GOA-ACAP-ARAP_08.05.2020_00h00 | 0,003878796 | 0,009742802 | 2,1903E-06  | 8,4755E-06 | [4, 5]          | Group183 | 4,37  | 31,00 |
| GO:0090068 | positive regulation of cell cycle process                       | GO_BiologicalProcess-EBI-UniProt-GOA-ACAP-ARAP_08.05.2020_00h00 | 0,028356241 | 0,044633094 | 2,1903E-06  | 8,4755E-06 | [3, 4, 5, 6]    | Group183 | 4,64  | 14,00 |
| GO:0007093 | mitotic cell cycle checkpoint                                   | GO_BiologicalProcess-EBI-UniProt-GOA-ACAP-ARAP_08.05.2020_00h00 | 0,002140553 | 0,00640159  | 2,1903E-06  | 8,4755E-06 | [3, 4, 5, 6, 7] | Group183 | 6,90  | 12,00 |
| GO:0042770 | signal transduction in response to DNA damage                   | GO_BiologicalProcess-EBI-UniProt-GOA-ACAP-ARAP_08.05.2020_00h00 | 0,001526183 | 0,004951043 | 2,1903E-06  | 8,4755E-06 | [4, 5, 6]       | Group183 | 7,59  | 11,00 |
| GO:0045930 | negative regulation of mitotic cell cycle                       | GO_BiologicalProcess-EBI-UniProt-GOA-ACAP-ARAP_08.05.2020_00h00 | 0,000464017 | 0,001973621 | 2,1903E-06  | 8,4755E-06 | [4, 5, 6]       | Group183 | 6,06  | 20,00 |
| GO:0072331 | signal transduction by p53 class mediator                       | GO_BiologicalProcess-EBI-UniProt-GOA-ACAP-ARAP_08.05.2020_00h00 | 0,010597887 | 0,021351954 | 2,1903E-06  | 8,4755E-06 | [4, 5, 6]       | Group183 | 5,12  | 15,00 |
| GO:0097193 | intrinsic apoptotic signaling pathway                           | GO_BiologicalProcess-EBI-UniProt-GOA-ACAP-ARAP_08.05.2020_00h00 | 0,000166499 | 0,000895165 | 2,1903E-06  | 8,4755E-06 | [4, 5, 6]       | Group183 | 6,56  | 20,00 |
| GO:1901988 | negative regulation of cell cycle phase transition              | GO_BiologicalProcess-EBI-UniProt-GOA-ACAP-ARAP_08.05.2020_00h00 | 0,001211727 | 0,004097606 | 2,1903E-06  | 8,4755E-06 | [4, 5, 6, 7]    | Group183 | 6,25  | 16,00 |
| GO:0000077 | DNA damage checkpoint                                           | GO_BiologicalProcess-EBI-UniProt-GOA-ACAP-ARAP_08.05.2020_00h00 | 0,003633375 | 0,00934715  | 2,1903E-06  | 8,4755E-06 | [4, 5, 6, 7, 8] | Group183 | 6,79  | 11,00 |
| GO:0008630 | intrinsic apoptotic signaling pathway in response to DNA damage | GO_BiologicalProcess-EBI-UniProt-GOA-ACAP-ARAP_08.05.2020_00h00 | 0,002549824 | 0,007219472 | 2,1903E-06  | 8,4755E-06 | [5, 6, 7]       | Group183 | 8,11  | 9,00  |
| GO:0071158 | positive regulation of cell cycle arrest                        | GO_BiologicalProcess-EBI-UniProt-GOA-ACAP-ARAP_08.05.2020_00h00 | 0,002135142 | 0,006405427 | 2,1903E-06  | 8,4755E-06 | [4, 5, 6, 7, 8] | Group183 | 9,09  | 8,00  |

|            |                                                                                               |                                                                 |             |             |             |            |                                 |          |       |       |
|------------|-----------------------------------------------------------------------------------------------|-----------------------------------------------------------------|-------------|-------------|-------------|------------|---------------------------------|----------|-------|-------|
| GO:0031572 | G2 DNA damage checkpoint                                                                      | GO_BiologicalProcess-EBI-UniProt-GOA-ACAP-ARAP_08.05.2020_00h00 | 0,015443421 | 0,028044315 | 2,1903E-06  | 8,4755E-06 | [5, 6, 7, 8, 9]                 | Group183 | 10,81 | 4,00  |
| GO:0044773 | mitotic DNA damage checkpoint                                                                 | GO_BiologicalProcess-EBI-UniProt-GOA-ACAP-ARAP_08.05.2020_00h00 | 0,001520331 | 0,004948833 | 2,1903E-06  | 8,4755E-06 | [5, 6, 7, 8, 9]                 | Group183 | 8,74  | 9,00  |
| GO:0072422 | signal transduction involved in DNA damage checkpoint                                         | GO_BiologicalProcess-EBI-UniProt-GOA-ACAP-ARAP_08.05.2020_00h00 | 0,003707789 | 0,009437113 | 2,1903E-06  | 8,4755E-06 | [5, 6, 7, 8, 9]                 | Group183 | 9,21  | 7,00  |
| GO:0004693 | cyclin-dependent protein serine/threonine kinase activity                                     | GO_BiologicalProcess-EBI-UniProt-GOA-ACAP-ARAP_08.05.2020_00h00 | 0,000545112 | 0,002248586 | 2,1903E-06  | 8,4755E-06 | [5, 6, 9, 10]                   | Group183 | 8,59  | 11,00 |
| GO:2000134 | negative regulation of G1/S transition of mitotic cell cycle                                  | GO_BiologicalProcess-EBI-UniProt-GOA-ACAP-ARAP_08.05.2020_00h00 | 0,022311579 | 0,037394363 | 2,1903E-06  | 8,4755E-06 | [6, 7, 8, 9]                    | Group183 | 6,54  | 7,00  |
| GO:0006977 | DNA damage response, signal transduction by p53 class mediator resulting in cell cycle arrest | GO_BiologicalProcess-EBI-UniProt-GOA-ACAP-ARAP_08.05.2020_00h00 | 0,003648136 | 0,009359963 | 2,1903E-06  | 8,4755E-06 | [5, 6, 7, 8, 9, 10, 11, 12, 13] | Group183 | 10,53 | 6,00  |
| GO:0001934 | positive regulation of protein phosphorylation                                                | GO_BiologicalProcess-EBI-UniProt-GOA-ACAP-ARAP_08.05.2020_00h00 | 4,44036E-07 | 6,07061E-06 | 2,47322E-06 | 9,1715E-06 | [6, 7, 8, 9]                    | Group112 | 5,24  | 57,00 |
| GO:0018209 | peptidyl-serine modification                                                                  | GO_BiologicalProcess-EBI-UniProt-GOA-ACAP-ARAP_08.05.2020_00h00 | 0,000275328 | 0,001337508 | 2,47322E-06 | 9,1715E-06 | [7, 8]                          | Group112 | 6,01  | 22,00 |
| GO:0018105 | peptidyl-serine phosphorylation                                                               | GO_BiologicalProcess-EBI-UniProt-GOA-ACAP-ARAP_08.05.2020_00h00 | 0,000650843 | 0,00255269  | 2,47322E-06 | 9,1715E-06 | [7, 8, 9]                       | Group112 | 5,90  | 20,00 |
| GO:0033135 | regulation of peptidyl-serine phosphorylation                                                 | GO_BiologicalProcess-EBI-UniProt-GOA-ACAP-ARAP_08.05.2020_00h00 | 0,011230711 | 0,022437977 | 2,47322E-06 | 9,1715E-06 | [7, 8, 9, 10]                   | Group112 | 6,10  | 10,00 |
| GO:0032147 | activation of protein kinase activity                                                         | GO_BiologicalProcess-EBI-UniProt-GOA-ACAP-ARAP_08.05.2020_00h00 | 2,21901E-05 | 0,000176966 | 2,47322E-06 | 9,1715E-06 | [8, 9, 10, 11]                  | Group112 | 6,48  | 26,00 |
| GO:0070848 | response to growth factor                                                                     | GO_BiologicalProcess-EBI-UniProt-GOA-ACAP-ARAP_08.05.2020_00h00 | 1,15067E-05 | 0,000101962 | 2,4491E-06  | 9,2753E-06 | [4]                             | Group079 | 5,37  | 41,00 |
| GO:1901652 | response to peptide                                                                           | GO_BiologicalProcess-EBI-UniProt-GOA-ACAP-ARAP_08.05.2020_00h00 | 0,00784214  | 0,01709551  | 2,4491E-06  | 9,2753E-06 | [4, 5]                          | Group079 | 4,42  | 25,00 |
| GO:0007167 | enzyme linked receptor protein signaling pathway                                              | GO_BiologicalProcess-EBI-UniProt-GOA-ACAP-ARAP_08.05.2020_00h00 | 3,81246E-06 | 3,96579E-05 | 2,4491E-06  | 9,2753E-06 | [4, 5, 6]                       | Group079 | 4,96  | 55,00 |
| GO:0007169 | transmembrane receptor protein tyrosine kinase signaling pathway                              | GO_BiologicalProcess-EBI-UniProt-GOA-ACAP-ARAP_08.05.2020_00h00 | 0,00012082  | 0,000718164 | 2,4491E-06  | 9,2753E-06 | [5, 6, 7]                       | Group079 | 4,97  | 38,00 |
| GO:0010810 | regulation of cell-substrate adhesion                                                         | GO_BiologicalProcess-EBI-UniProt-GOA-ACAP-ARAP_08.05.2020_00h00 | 3,73914E-05 | 0,000273157 | 2,73209E-06 | 9,9247E-06 | [4, 5]                          | Group109 | 7,83  | 18,00 |
| GO:0010812 | negative regulation of cell-substrate adhesion                                                | GO_BiologicalProcess-EBI-UniProt-GOA-ACAP-ARAP_08.05.2020_00h00 | 0,032554209 | 0,04921703  | 2,73209E-06 | 9,9247E-06 | [4, 5, 6]                       | Group109 | 7,35  | 5,00  |
| GO:0001952 | regulation of cell-matrix adhesion                                                            | GO_BiologicalProcess-EBI-UniProt-GOA-ACAP-ARAP_08.05.2020_00h00 | 4,35039E-05 | 0,000308394 | 2,73209E-06 | 9,9247E-06 | [5, 6]                          | Group109 | 9,85  | 13,00 |
| GO:0048041 | focal adhesion assembly                                                                       | GO_BiologicalProcess-EBI-UniProt-GOA-ACAP-ARAP_08.05.2020_00h00 | 0,00302181  | 0,00814612  | 2,73209E-06 | 9,9247E-06 | [5, 7]                          | Group109 | 8,60  | 8,00  |
| GO:0032232 | negative regulation of actin filament bundle assembly                                         | GO_BiologicalProcess-EBI-UniProt-GOA-ACAP-ARAP_08.05.2020_00h00 | 0,010381774 | 0,021094177 | 2,73209E-06 | 9,9247E-06 | [5, 6, 7, 8, 9, 10, 11]         | Group109 | 12,12 | 4,00  |
| GO:0009057 | macromolecule catabolic process                                                               | GO_BiologicalProcess-EBI-UniProt-GOA-ACAP-ARAP_08.05.2020_00h00 | 0,000587955 | 0,002364171 | 3,0958E-06  | 1,0805E-05 | [4]                             | Group168 | 4,01  | 60,00 |
| GO:0006508 | proteolysis                                                                                   | GO_BiologicalProcess-EBI-UniProt-GOA-ACAP-ARAP_08.05.2020_00h00 | 5,7795E-05  | 0,00039507  | 3,0958E-06  | 1,0805E-05 | [4, 5]                          | Group168 | 4,07  | 77,00 |
| GO:0030163 | protein catabolic process                                                                     | GO_BiologicalProcess-EBI-UniProt-GOA-ACAP-ARAP_08.05.2020_00h00 | 0,003023085 | 0,008126664 | 3,0958E-06  | 1,0805E-05 | [4, 5]                          | Group168 | 4,10  | 41,00 |

|            |                                                            |                                                                 |             |             |             |            |              |          |      |       |
|------------|------------------------------------------------------------|-----------------------------------------------------------------|-------------|-------------|-------------|------------|--------------|----------|------|-------|
| GO:0044265 | cellular macromolecule catabolic process                   | GO_BiologicalProcess-EBI-UniProt-GOA-ACAP-ARAP_08.05.2020_00h00 | 0,000537689 | 0,002237255 | 3,0958E-06  | 1,0805E-05 | [4, 5]       | Group168 | 4,19 | 52,00 |
| GO:0008233 | peptidase activity                                         | GO_BiologicalProcess-EBI-UniProt-GOA-ACAP-ARAP_08.05.2020_00h00 | 0,0002754   | 0,001331101 | 3,0958E-06  | 1,0805E-05 | [5, 6]       | Group168 | 4,39 | 49,00 |
| GO:0030162 | regulation of proteolysis                                  | GO_BiologicalProcess-EBI-UniProt-GOA-ACAP-ARAP_08.05.2020_00h00 | 0,004999209 | 0,011901102 | 3,0958E-06  | 1,0805E-05 | [5, 6]       | Group168 | 4,21 | 33,00 |
| GO:0044257 | cellular protein catabolic process                         | GO_BiologicalProcess-EBI-UniProt-GOA-ACAP-ARAP_08.05.2020_00h00 | 0,003651367 | 0,009343204 | 3,0958E-06  | 1,0805E-05 | [5, 6]       | Group168 | 4,23 | 35,00 |
| GO:0051603 | proteolysis involved in cellular protein catabolic process | GO_BiologicalProcess-EBI-UniProt-GOA-ACAP-ARAP_08.05.2020_00h00 | 0,003256541 | 0,00856184  | 3,0958E-06  | 1,0805E-05 | [5, 6, 7]    | Group168 | 4,34 | 33,00 |
| GO:0010498 | proteasomal protein catabolic process                      | GO_BiologicalProcess-EBI-UniProt-GOA-ACAP-ARAP_08.05.2020_00h00 | 0,006044001 | 0,013870765 | 3,0958E-06  | 1,0805E-05 | [5, 6, 7, 8] | Group168 | 4,64 | 23,00 |
| GO:0070011 | peptidase activity, acting on L-amino acid peptides        | GO_BiologicalProcess-EBI-UniProt-GOA-ACAP-ARAP_08.05.2020_00h00 | 0,00039584  | 0,00177018  | 3,0958E-06  | 1,0805E-05 | [6, 7]       | Group168 | 4,37 | 47,00 |
| GO:0004175 | endopeptidase activity                                     | GO_BiologicalProcess-EBI-UniProt-GOA-ACAP-ARAP_08.05.2020_00h00 | 0,000555813 | 0,002282888 | 3,0958E-06  | 1,0805E-05 | [7, 8]       | Group168 | 4,52 | 40,00 |
| GO:0008234 | cysteine-type peptidase activity                           | GO_BiologicalProcess-EBI-UniProt-GOA-ACAP-ARAP_08.05.2020_00h00 | 0,000334646 | 0,001554642 | 3,0958E-06  | 1,0805E-05 | [7, 8]       | Group168 | 5,49 | 26,00 |
| GO:0052548 | regulation of endopeptidase activity                       | GO_BiologicalProcess-EBI-UniProt-GOA-ACAP-ARAP_08.05.2020_00h00 | 0,000937128 | 0,003333945 | 3,0958E-06  | 1,0805E-05 | [6, 7, 8, 9] | Group168 | 5,29 | 24,00 |
| GO:0009894 | regulation of catabolic process                            | GO_BiologicalProcess-EBI-UniProt-GOA-ACAP-ARAP_08.05.2020_00h00 | 0,002341402 | 0,006810703 | 3,09319E-06 | 1,1012E-05 | [3, 4]       | Group186 | 4,08 | 44,00 |
| GO:0009057 | macromolecule catabolic process                            | GO_BiologicalProcess-EBI-UniProt-GOA-ACAP-ARAP_08.05.2020_00h00 | 0,000587955 | 0,002364171 | 3,09319E-06 | 1,1012E-05 | [4]          | Group186 | 4,01 | 60,00 |
| GO:0019439 | aromatic compound catabolic process                        | GO_BiologicalProcess-EBI-UniProt-GOA-ACAP-ARAP_08.05.2020_00h00 | 0,012572658 | 0,024455354 | 3,09319E-06 | 1,1012E-05 | [4]          | Group186 | 4,15 | 27,00 |
| GO:0044270 | cellular nitrogen compound catabolic process               | GO_BiologicalProcess-EBI-UniProt-GOA-ACAP-ARAP_08.05.2020_00h00 | 0,009469164 | 0,019699978 | 3,09319E-06 | 1,1012E-05 | [4]          | Group186 | 4,25 | 27,00 |
| GO:0046700 | heterocycle catabolic process                              | GO_BiologicalProcess-EBI-UniProt-GOA-ACAP-ARAP_08.05.2020_00h00 | 0,008757261 | 0,018623775 | 3,09319E-06 | 1,1012E-05 | [4]          | Group186 | 4,28 | 27,00 |
| GO:1901361 | organic cyclic compound catabolic process                  | GO_BiologicalProcess-EBI-UniProt-GOA-ACAP-ARAP_08.05.2020_00h00 | 0,013598622 | 0,025872527 | 3,09319E-06 | 1,1012E-05 | [4]          | Group186 | 4,09 | 28,00 |
| GO:0006508 | proteolysis                                                | GO_BiologicalProcess-EBI-UniProt-GOA-ACAP-ARAP_08.05.2020_00h00 | 5,7795E-05  | 0,00039507  | 3,09319E-06 | 1,1012E-05 | [4, 5]       | Group186 | 4,07 | 77,00 |
| GO:0006518 | peptide metabolic process                                  | GO_BiologicalProcess-EBI-UniProt-GOA-ACAP-ARAP_08.05.2020_00h00 | 0,002876424 | 0,007864966 | 3,09319E-06 | 1,1012E-05 | [4, 5]       | Group186 | 4,23 | 37,00 |
| GO:0030163 | protein catabolic process                                  | GO_BiologicalProcess-EBI-UniProt-GOA-ACAP-ARAP_08.05.2020_00h00 | 0,003023085 | 0,008126664 | 3,09319E-06 | 1,1012E-05 | [4, 5]       | Group186 | 4,10 | 41,00 |
| GO:0031329 | regulation of cellular catabolic process                   | GO_BiologicalProcess-EBI-UniProt-GOA-ACAP-ARAP_08.05.2020_00h00 | 0,00275227  | 0,007656751 | 3,09319E-06 | 1,1012E-05 | [4, 5]       | Group186 | 4,21 | 38,00 |
| GO:0034248 | regulation of cellular amide metabolic process             | GO_BiologicalProcess-EBI-UniProt-GOA-ACAP-ARAP_08.05.2020_00h00 | 0,000700788 | 0,00270425  | 3,09319E-06 | 1,1012E-05 | [4, 5]       | Group186 | 5,22 | 26,00 |
| GO:0034655 | nucleobase-containing compound catabolic process           | GO_BiologicalProcess-EBI-UniProt-GOA-ACAP-ARAP_08.05.2020_00h00 | 0,009850574 | 0,020229612 | 3,09319E-06 | 1,1012E-05 | [4, 5]       | Group186 | 4,33 | 25,00 |
| GO:0044265 | cellular macromolecule catabolic process                   | GO_BiologicalProcess-EBI-UniProt-GOA-ACAP-ARAP_08.05.2020_00h00 | 0,000537689 | 0,002237255 | 3,09319E-06 | 1,1012E-05 | [4, 5]       | Group186 | 4,19 | 52,00 |

|            |                                                                           |                                                                 |             |             |             |            |                 |          |       |       |
|------------|---------------------------------------------------------------------------|-----------------------------------------------------------------|-------------|-------------|-------------|------------|-----------------|----------|-------|-------|
| GO:0034250 | positive regulation of cellular amide metabolic process                   | GO_BiologicalProcess-EBI-UniProt-GOA-ACAP-ARAP_08.05.2020_00h00 | 0,002245195 | 0,006611236 | 3,09319E-06 | 1,1012E-05 | [4, 5, 6]       | Group186 | 6,86  | 12,00 |
| GO:0043604 | amide biosynthetic process                                                | GO_BiologicalProcess-EBI-UniProt-GOA-ACAP-ARAP_08.05.2020_00h00 | 0,00857806  | 0,018283304 | 3,09319E-06 | 1,1012E-05 | [5]             | Group186 | 4,00  | 35,00 |
| GO:0010608 | posttranscriptional regulation of gene expression                         | GO_BiologicalProcess-EBI-UniProt-GOA-ACAP-ARAP_08.05.2020_00h00 | 0,000370525 | 0,001688533 | 3,09319E-06 | 1,1012E-05 | [5, 6]          | Group186 | 4,89  | 34,00 |
| GO:0043043 | peptide biosynthetic process                                              | GO_BiologicalProcess-EBI-UniProt-GOA-ACAP-ARAP_08.05.2020_00h00 | 0,013397908 | 0,025694987 | 3,09319E-06 | 1,1012E-05 | [5, 6]          | Group186 | 4,06  | 29,00 |
| GO:0044257 | cellular protein catabolic process                                        | GO_BiologicalProcess-EBI-UniProt-GOA-ACAP-ARAP_08.05.2020_00h00 | 0,003651367 | 0,009343204 | 3,09319E-06 | 1,1012E-05 | [5, 6]          | Group186 | 4,23  | 35,00 |
| GO:0043487 | regulation of RNA stability                                               | GO_BiologicalProcess-EBI-UniProt-GOA-ACAP-ARAP_08.05.2020_00h00 | 0,014361648 | 0,026584327 | 3,09319E-06 | 1,1012E-05 | [3, 5, 6, 7, 8] | Group186 | 5,61  | 11,00 |
| GO:0006401 | RNA catabolic process                                                     | GO_BiologicalProcess-EBI-UniProt-GOA-ACAP-ARAP_08.05.2020_00h00 | 0,009984245 | 0,020460218 | 3,09319E-06 | 1,1012E-05 | [5, 6, 7]       | Group186 | 4,64  | 20,00 |
| GO:0006413 | translational initiation                                                  | GO_BiologicalProcess-EBI-UniProt-GOA-ACAP-ARAP_08.05.2020_00h00 | 0,002980064 | 0,008079099 | 3,09319E-06 | 1,1012E-05 | [3, 6, 7, 8]    | Group186 | 6,34  | 13,00 |
| GO:0051603 | proteolysis involved in cellular protein catabolic process                | GO_BiologicalProcess-EBI-UniProt-GOA-ACAP-ARAP_08.05.2020_00h00 | 0,003256541 | 0,00856184  | 3,09319E-06 | 1,1012E-05 | [5, 6, 7]       | Group186 | 4,34  | 33,00 |
| GO:0006402 | mRNA catabolic process                                                    | GO_BiologicalProcess-EBI-UniProt-GOA-ACAP-ARAP_08.05.2020_00h00 | 0,014094888 | 0,026242817 | 3,09319E-06 | 1,1012E-05 | [5, 6, 7, 8]    | Group186 | 4,64  | 18,00 |
| GO:0006417 | regulation of translation                                                 | GO_BiologicalProcess-EBI-UniProt-GOA-ACAP-ARAP_08.05.2020_00h00 | 0,000423629 | 0,001851203 | 3,09319E-06 | 1,1012E-05 | [5, 6, 7, 8]    | Group186 | 5,59  | 24,00 |
| GO:0010498 | proteasomal protein catabolic process                                     | GO_BiologicalProcess-EBI-UniProt-GOA-ACAP-ARAP_08.05.2020_00h00 | 0,006044001 | 0,013870765 | 3,09319E-06 | 1,1012E-05 | [5, 6, 7, 8]    | Group186 | 4,64  | 23,00 |
| GO:0006446 | regulation of translational initiation                                    | GO_BiologicalProcess-EBI-UniProt-GOA-ACAP-ARAP_08.05.2020_00h00 | 0,019380657 | 0,033783767 | 3,09319E-06 | 1,1012E-05 | [4, 6, 7, 8, 9] | Group186 | 7,41  | 6,00  |
| GO:0017148 | negative regulation of translation                                        | GO_BiologicalProcess-EBI-UniProt-GOA-ACAP-ARAP_08.05.2020_00h00 | 0,012469945 | 0,024354564 | 3,09319E-06 | 1,1012E-05 | [5, 6, 7, 8, 9] | Group186 | 6,34  | 9,00  |
| GO:0045727 | positive regulation of translation                                        | GO_BiologicalProcess-EBI-UniProt-GOA-ACAP-ARAP_08.05.2020_00h00 | 0,011439243 | 0,022712355 | 3,09319E-06 | 1,1012E-05 | [5, 6, 7, 8, 9] | Group186 | 6,43  | 9,00  |
| GO:0000956 | nuclear-transcribed mRNA catabolic process                                | GO_BiologicalProcess-EBI-UniProt-GOA-ACAP-ARAP_08.05.2020_00h00 | 0,029677309 | 0,045956612 | 3,09319E-06 | 1,1012E-05 | [6, 7, 8, 9]    | Group186 | 5,02  | 11,00 |
| GO:0000288 | nuclear-transcribed mRNA catabolic process, deadenylation-dependent decay | GO_BiologicalProcess-EBI-UniProt-GOA-ACAP-ARAP_08.05.2020_00h00 | 0,0039889   | 0,009915266 | 3,09319E-06 | 1,1012E-05 | [7, 8, 9, 10]   | Group186 | 9,09  | 7,00  |
| GO:0043928 | exonucleolytic catabolism of deadenylated mRNA                            | GO_BiologicalProcess-EBI-UniProt-GOA-ACAP-ARAP_08.05.2020_00h00 | 0,010381774 | 0,021094177 | 3,09319E-06 | 1,1012E-05 | [8, 9, 10, 11]  | Group186 | 12,12 | 4,00  |
| GO:0007044 | cell-substrate junction assembly                                          | GO_BiologicalProcess-EBI-UniProt-GOA-ACAP-ARAP_08.05.2020_00h00 | 6,03086E-06 | 5,82983E-05 | 3,77865E-06 | 1,2935E-05 | [6]             | Group057 | 11,82 | 13,00 |
| GO:0070831 | basement membrane assembly                                                | GO_BiologicalProcess-EBI-UniProt-GOA-ACAP-ARAP_08.05.2020_00h00 | 0,009205425 | 0,019319279 | 3,77865E-06 | 1,2935E-05 | [6, 7]          | Group057 | 17,65 | 3,00  |
| GO:0031581 | hemidesmosome assembly                                                    | GO_BiologicalProcess-EBI-UniProt-GOA-ACAP-ARAP_08.05.2020_00h00 | 1,29834E-05 | 0,000111938 | 3,77865E-06 | 1,2935E-05 | [7]             | Group057 | 38,46 | 5,00  |
| GO:0036294 | cellular response to decreased oxygen levels                              | GO_BiologicalProcess-EBI-UniProt-GOA-ACAP-ARAP_08.05.2020_00h00 | 6,02248E-06 | 5,88114E-05 | 4,39587E-06 | 1,4763E-05 | [5]             | Group060 | 8,60  | 19,00 |



|            |                                                                                            |                                                                 |             |             |             |            |                              |          |       |       |
|------------|--------------------------------------------------------------------------------------------|-----------------------------------------------------------------|-------------|-------------|-------------|------------|------------------------------|----------|-------|-------|
| GO:0043618 | regulation of transcription from RNA polymerase II promoter in response to stress          | GO_BiologicalProcess-EBI-UniProt-GOA-ACAP-ARAP_08.05.2020_00h00 | 0,016302135 | 0,029436117 | 4,39587E-06 | 1,4763E-05 | [5, 7, 8, 9, 10, 11, 12]     | Group060 | 6,45  | 8,00  |
| GO:0036003 | positive regulation of transcription from RNA polymerase II promoter in response to stress | GO_BiologicalProcess-EBI-UniProt-GOA-ACAP-ARAP_08.05.2020_00h00 | 0,008316356 | 0,017884837 | 4,39587E-06 | 1,4763E-05 | [6, 7, 8, 9, 10, 11, 12, 13] | Group060 | 12,90 | 4,00  |
| GO:0060429 | epithelium development                                                                     | GO_BiologicalProcess-EBI-UniProt-GOA-ACAP-ARAP_08.05.2020_00h00 | 5,08926E-06 | 5,18131E-05 | 5,08926E-06 | 1,6776E-05 | [4]                          | Group102 | 4,64  | 64,00 |
| GO:0030855 | epithelial cell differentiation                                                            | GO_BiologicalProcess-EBI-UniProt-GOA-ACAP-ARAP_08.05.2020_00h00 | 0,00043345  | 0,001885508 | 5,08926E-06 | 1,6776E-05 | [4, 5]                       | Group102 | 4,66  | 38,00 |
| GO:0002064 | epithelial cell development                                                                | GO_BiologicalProcess-EBI-UniProt-GOA-ACAP-ARAP_08.05.2020_00h00 | 3,30027E-06 | 3,50928E-05 | 5,08926E-06 | 1,6776E-05 | [4, 5, 6]                    | Group102 | 8,62  | 20,00 |
| GO:0003158 | endothelium development                                                                    | GO_BiologicalProcess-EBI-UniProt-GOA-ACAP-ARAP_08.05.2020_00h00 | 0,000445457 | 0,001920282 | 5,08926E-06 | 1,6776E-05 | [5]                          | Group102 | 8,80  | 11,00 |
| GO:0001885 | endothelial cell development                                                               | GO_BiologicalProcess-EBI-UniProt-GOA-ACAP-ARAP_08.05.2020_00h00 | 0,000314285 | 0,001481627 | 5,08926E-06 | 1,6776E-05 | [5, 6, 7]                    | Group102 | 12,12 | 8,00  |
| GO:0098751 | bone cell development                                                                      | GO_BiologicalProcess-EBI-UniProt-GOA-ACAP-ARAP_08.05.2020_00h00 | 0,014057252 | 0,026326399 | 6,2456E-06  | 2,0213E-05 | [4, 5, 6, 7]                 | Group084 | 11,11 | 4,00  |
| GO:0030099 | myeloid cell differentiation                                                               | GO_BiologicalProcess-EBI-UniProt-GOA-ACAP-ARAP_08.05.2020_00h00 | 6,2456E-06  | 5,97704E-05 | 6,2456E-06  | 2,0213E-05 | [4, 5, 6, 7, 8]              | Group084 | 6,55  | 29,00 |
| GO:0061515 | myeloid cell development                                                                   | GO_BiologicalProcess-EBI-UniProt-GOA-ACAP-ARAP_08.05.2020_00h00 | 0,000976749 | 0,003436575 | 6,2456E-06  | 2,0213E-05 | [4, 5, 6, 7, 8, 9]           | Group084 | 10,26 | 8,00  |
| GO:0043249 | erythrocyte maturation                                                                     | GO_BiologicalProcess-EBI-UniProt-GOA-ACAP-ARAP_08.05.2020_00h00 | 0,012620698 | 0,024499003 | 6,2456E-06  | 2,0213E-05 | [4, 5, 6, 7, 8, 9, 10, 11]   | Group084 | 15,79 | 3,00  |
| GO:0044089 | positive regulation of cellular component biogenesis                                       | GO_BiologicalProcess-EBI-UniProt-GOA-ACAP-ARAP_08.05.2020_00h00 | 0,006975319 | 0,01552414  | 1,18322E-05 | 3,761E-05  | [3, 4, 5]                    | Group130 | 4,41  | 26,00 |
| GO:0034329 | cell junction assembly                                                                     | GO_BiologicalProcess-EBI-UniProt-GOA-ACAP-ARAP_08.05.2020_00h00 | 0,000284442 | 0,001361054 | 1,18322E-05 | 3,761E-05  | [5]                          | Group130 | 5,54  | 26,00 |
| GO:1901888 | regulation of cell junction assembly                                                       | GO_BiologicalProcess-EBI-UniProt-GOA-ACAP-ARAP_08.05.2020_00h00 | 0,029677309 | 0,045956612 | 1,18322E-05 | 3,761E-05  | [4, 5, 6]                    | Group130 | 5,02  | 11,00 |
| GO:1901890 | positive regulation of cell junction assembly                                              | GO_BiologicalProcess-EBI-UniProt-GOA-ACAP-ARAP_08.05.2020_00h00 | 0,023341313 | 0,038579684 | 1,18322E-05 | 3,761E-05  | [4, 5, 6, 7]                 | Group130 | 6,48  | 7,00  |
| GO:0001954 | positive regulation of cell-matrix adhesion                                                | GO_BiologicalProcess-EBI-UniProt-GOA-ACAP-ARAP_08.05.2020_00h00 | 0,000936067 | 0,003342597 | 1,18322E-05 | 3,761E-05  | [5, 6, 7]                    | Group130 | 11,67 | 7,00  |
| GO:0099068 | postsynapse assembly                                                                       | GO_BiologicalProcess-EBI-UniProt-GOA-ACAP-ARAP_08.05.2020_00h00 | 0,009311849 | 0,0194149   | 1,18322E-05 | 3,761E-05  | [5, 6, 7]                    | Group130 | 12,50 | 4,00  |
| GO:0001816 | cytokine production                                                                        | GO_BiologicalProcess-EBI-UniProt-GOA-ACAP-ARAP_08.05.2020_00h00 | 0,000179184 | 0,00095266  | 1,64661E-05 | 5,142E-05  | [2, 5]                       | Group072 | 4,75  | 41,00 |
| GO:0006954 | inflammatory response                                                                      | GO_BiologicalProcess-EBI-UniProt-GOA-ACAP-ARAP_08.05.2020_00h00 | 0,000333665 | 0,001557644 | 1,64661E-05 | 5,142E-05  | [4]                          | Group072 | 4,73  | 38,00 |
| GO:0050727 | regulation of inflammatory response                                                        | GO_BiologicalProcess-EBI-UniProt-GOA-ACAP-ARAP_08.05.2020_00h00 | 0,005733951 | 0,013254566 | 1,64661E-05 | 5,142E-05  | [4, 5, 6]                    | Group072 | 4,99  | 19,00 |
| GO:0001816 | cytokine production                                                                        | GO_BiologicalProcess-EBI-UniProt-GOA-ACAP-ARAP_08.05.2020_00h00 | 0,000179184 | 0,00095266  | 1,64661E-05 | 5,142E-05  | [2, 5]                       | Group144 | 4,75  | 41,00 |
| GO:0006954 | inflammatory response                                                                      | GO_BiologicalProcess-EBI-UniProt-GOA-ACAP-ARAP_08.05.2020_00h00 | 0,000333665 | 0,001557644 | 1,64661E-05 | 5,142E-05  | [4]                          | Group144 | 4,73  | 38,00 |

|            |                                                                             |                                                                 |             |             |             |            |                            |          |       |       |
|------------|-----------------------------------------------------------------------------|-----------------------------------------------------------------|-------------|-------------|-------------|------------|----------------------------|----------|-------|-------|
| GO:0001817 | regulation of cytokine production                                           | GO_BiologicalProcess-EBI-UniProt-GOA-ACAP-ARAP_08.05.2020_00h00 | 0,001565843 | 0,005045494 | 1,64661E-05 | 5,142E-05  | [3, 4, 5, 6]               | Group144 | 4,46  | 35,00 |
| GO:0032635 | interleukin-6 production                                                    | GO_BiologicalProcess-EBI-UniProt-GOA-ACAP-ARAP_08.05.2020_00h00 | 0,001438689 | 0,004715156 | 1,64661E-05 | 5,142E-05  | [3, 6]                     | Group144 | 7,23  | 12,00 |
| GO:0001819 | positive regulation of cytokine production                                  | GO_BiologicalProcess-EBI-UniProt-GOA-ACAP-ARAP_08.05.2020_00h00 | 0,013490905 | 0,025718717 | 1,64661E-05 | 5,142E-05  | [3, 4, 5, 6, 7]            | Group144 | 4,37  | 22,00 |
| GO:0032652 | regulation of interleukin-1 production                                      | GO_BiologicalProcess-EBI-UniProt-GOA-ACAP-ARAP_08.05.2020_00h00 | 0,023341313 | 0,038579684 | 1,64661E-05 | 5,142E-05  | [4, 5, 6, 7]               | Group144 | 6,48  | 7,00  |
| GO:0032675 | regulation of interleukin-6 production                                      | GO_BiologicalProcess-EBI-UniProt-GOA-ACAP-ARAP_08.05.2020_00h00 | 0,000707176 | 0,002707069 | 1,64661E-05 | 5,142E-05  | [4, 5, 6, 7]               | Group144 | 7,84  | 12,00 |
| GO:0032715 | negative regulation of interleukin-6 production                             | GO_BiologicalProcess-EBI-UniProt-GOA-ACAP-ARAP_08.05.2020_00h00 | 0,007454556 | 0,016362408 | 1,64661E-05 | 5,142E-05  | [4, 5, 6, 7, 8]            | Group144 | 10,64 | 5,00  |
| GO:0050663 | cytokine secretion                                                          | GO_BiologicalProcess-EBI-UniProt-GOA-ACAP-ARAP_08.05.2020_00h00 | 0,028077139 | 0,044266593 | 1,64661E-05 | 5,142E-05  | [3, 4, 5, 6, 7, 8, 9]      | Group144 | 4,76  | 13,00 |
| GO:0030218 | erythrocyte differentiation                                                 | GO_BiologicalProcess-EBI-UniProt-GOA-ACAP-ARAP_08.05.2020_00h00 | 0,001763233 | 0,005550702 | 2,06316E-05 | 6,3318E-05 | [4, 5, 6, 7, 8, 9]         | Group059 | 7,94  | 10,00 |
| GO:0061515 | myeloid cell development                                                    | GO_BiologicalProcess-EBI-UniProt-GOA-ACAP-ARAP_08.05.2020_00h00 | 0,000976749 | 0,003436575 | 2,06316E-05 | 6,3318E-05 | [4, 5, 6, 7, 8, 9]         | Group059 | 10,26 | 8,00  |
| GO:0043249 | erythrocyte maturation                                                      | GO_BiologicalProcess-EBI-UniProt-GOA-ACAP-ARAP_08.05.2020_00h00 | 0,012620698 | 0,024499003 | 2,06316E-05 | 6,3318E-05 | [4, 5, 6, 7, 8, 9, 10, 11] | Group059 | 15,79 | 3,00  |
| GO:0043616 | keratinocyte proliferation                                                  | GO_BiologicalProcess-EBI-UniProt-GOA-ACAP-ARAP_08.05.2020_00h00 | 0,000302994 | 0,001435473 | 2,58225E-05 | 7,7905E-05 | [4]                        | Group117 | 14,00 | 7,00  |
| GO:0030856 | regulation of epithelial cell differentiation                               | GO_BiologicalProcess-EBI-UniProt-GOA-ACAP-ARAP_08.05.2020_00h00 | 0,02252461  | 0,037685405 | 2,58225E-05 | 7,7905E-05 | [4, 5, 6]                  | Group117 | 5,73  | 9,00  |
| GO:0010837 | regulation of keratinocyte proliferation                                    | GO_BiologicalProcess-EBI-UniProt-GOA-ACAP-ARAP_08.05.2020_00h00 | 0,000487032 | 0,002035325 | 2,58225E-05 | 7,7905E-05 | [5, 6]                     | Group117 | 15,38 | 6,00  |
| GO:0030858 | positive regulation of epithelial cell differentiation                      | GO_BiologicalProcess-EBI-UniProt-GOA-ACAP-ARAP_08.05.2020_00h00 | 0,025888894 | 0,041569918 | 2,58225E-05 | 7,7905E-05 | [4, 5, 6, 7]               | Group117 | 7,81  | 5,00  |
| GO:1904035 | regulation of epithelial cell apoptotic process                             | GO_BiologicalProcess-EBI-UniProt-GOA-ACAP-ARAP_08.05.2020_00h00 | 9,95666E-05 | 0,000610803 | 2,58225E-05 | 7,7905E-05 | [6, 7]                     | Group117 | 11,36 | 10,00 |
| GO:0001570 | vasculogenesis                                                              | GO_BiologicalProcess-EBI-UniProt-GOA-ACAP-ARAP_08.05.2020_00h00 | 0,002293606 | 0,006712479 | 2,58225E-05 | 7,7905E-05 | [4, 5, 6, 7, 8, 9, 10]     | Group117 | 8,99  | 8,00  |
| GO:0002294 | CD4-positive, alpha-beta T cell differentiation involved in immune response | GO_BiologicalProcess-EBI-UniProt-GOA-ACAP-ARAP_08.05.2020_00h00 | 0,02291313  | 0,038135417 | 2,68601E-05 | 7,8379E-05 | [8, 9, 10, 11, 12, 13]     | Group125 | 8,06  | 5,00  |
| GO:0002263 | cell activation involved in immune response                                 | GO_BiologicalProcess-EBI-UniProt-GOA-ACAP-ARAP_08.05.2020_00h00 | 1,98211E-05 | 0,000163524 | 2,68601E-05 | 7,8379E-05 | [3]                        | Group125 | 5,24  | 41,00 |
| GO:0046649 | lymphocyte activation                                                       | GO_BiologicalProcess-EBI-UniProt-GOA-ACAP-ARAP_08.05.2020_00h00 | 0,001648926 | 0,0052426   | 2,68601E-05 | 7,8379E-05 | [3, 4]                     | Group125 | 4,41  | 36,00 |
| GO:0002285 | lymphocyte activation involved in immune response                           | GO_BiologicalProcess-EBI-UniProt-GOA-ACAP-ARAP_08.05.2020_00h00 | 0,004762104 | 0,01147943  | 2,68601E-05 | 7,8379E-05 | [4, 5]                     | Group125 | 6,25  | 12,00 |
| GO:0042110 | T cell activation                                                           | GO_BiologicalProcess-EBI-UniProt-GOA-ACAP-ARAP_08.05.2020_00h00 | 0,002095667 | 0,006306772 | 2,68601E-05 | 7,8379E-05 | [4, 5]                     | Group125 | 4,90  | 25,00 |
| GO:0030098 | lymphocyte differentiation                                                  | GO_BiologicalProcess-EBI-UniProt-GOA-ACAP-ARAP_08.05.2020_00h00 | 0,005579029 | 0,013022271 | 2,68601E-05 | 7,8379E-05 | [4, 5, 6, 7, 8, 9]         | Group125 | 5,00  | 19,00 |

|            |                                                                             |                                                                 |             |             |             |            |                                     |          |       |       |
|------------|-----------------------------------------------------------------------------|-----------------------------------------------------------------|-------------|-------------|-------------|------------|-------------------------------------|----------|-------|-------|
| GO:0002294 | CD4-positive, alpha-beta T cell differentiation involved in immune response | GO_BiologicalProcess-EBI-UniProt-GOA-ACAP-ARAP_08.05.2020_00h00 | 0,02291313  | 0,038135417 | 2,66407E-05 | 7,9034E-05 | [8, 9, 10, 11, 12, 13]              | Group174 | 8,06  | 5,00  |
| GO:0072539 | T-helper 17 cell differentiation                                            | GO_BiologicalProcess-EBI-UniProt-GOA-ACAP-ARAP_08.05.2020_00h00 | 0,029607117 | 0,045996774 | 2,66407E-05 | 7,9034E-05 | [6, 10, 11, 12, 13, 14, 15]         | Group174 | 11,54 | 3,00  |
| GO:0002285 | lymphocyte activation involved in immune response                           | GO_BiologicalProcess-EBI-UniProt-GOA-ACAP-ARAP_08.05.2020_00h00 | 0,004762104 | 0,01147943  | 2,66407E-05 | 7,9034E-05 | [4, 5]                              | Group174 | 6,25  | 12,00 |
| GO:0032616 | interleukin-13 production                                                   | GO_BiologicalProcess-EBI-UniProt-GOA-ACAP-ARAP_08.05.2020_00h00 | 0,032678593 | 0,04924947  | 2,66407E-05 | 7,9034E-05 | [3, 6]                              | Group174 | 11,11 | 3,00  |
| GO:0032633 | interleukin-4 production                                                    | GO_BiologicalProcess-EBI-UniProt-GOA-ACAP-ARAP_08.05.2020_00h00 | 0,002621352 | 0,007400101 | 2,66407E-05 | 7,9034E-05 | [3, 6]                              | Group174 | 13,51 | 5,00  |
| GO:0032634 | interleukin-5 production                                                    | GO_BiologicalProcess-EBI-UniProt-GOA-ACAP-ARAP_08.05.2020_00h00 | 0,021358484 | 0,036113199 | 2,66407E-05 | 7,9034E-05 | [3, 6]                              | Group174 | 13,04 | 3,00  |
| GO:0001819 | positive regulation of cytokine production                                  | GO_BiologicalProcess-EBI-UniProt-GOA-ACAP-ARAP_08.05.2020_00h00 | 0,013490905 | 0,025718717 | 2,66407E-05 | 7,9034E-05 | [3, 4, 5, 6, 7]                     | Group174 | 4,37  | 22,00 |
| GO:0070528 | protein kinase C signaling                                                  | GO_BiologicalProcess-EBI-UniProt-GOA-ACAP-ARAP_08.05.2020_00h00 | 0,002037594 | 0,006210119 | 2,66407E-05 | 7,9034E-05 | [4, 5, 6]                           | Group174 | 14,29 | 5,00  |
| GO:0032736 | positive regulation of interleukin-13 production                            | GO_BiologicalProcess-EBI-UniProt-GOA-ACAP-ARAP_08.05.2020_00h00 | 0,006402782 | 0,014520053 | 2,66407E-05 | 7,9034E-05 | [4, 5, 6, 7, 8]                     | Group174 | 20,00 | 3,00  |
| GO:0032754 | positive regulation of interleukin-5 production                             | GO_BiologicalProcess-EBI-UniProt-GOA-ACAP-ARAP_08.05.2020_00h00 | 0,004184007 | 0,010319832 | 2,66407E-05 | 7,9034E-05 | [4, 5, 6, 7, 8]                     | Group174 | 23,08 | 3,00  |
| GO:0050663 | cytokine secretion                                                          | GO_BiologicalProcess-EBI-UniProt-GOA-ACAP-ARAP_08.05.2020_00h00 | 0,028077139 | 0,044266593 | 2,66407E-05 | 7,9034E-05 | [3, 4, 5, 6, 7, 8, 9]               | Group174 | 4,76  | 13,00 |
| GO:0030098 | lymphocyte differentiation                                                  | GO_BiologicalProcess-EBI-UniProt-GOA-ACAP-ARAP_08.05.2020_00h00 | 0,005579029 | 0,013022271 | 2,66407E-05 | 7,9034E-05 | [4, 5, 6, 7, 8, 9]                  | Group174 | 5,00  | 19,00 |
| GO:0035745 | T-helper 2 cell cytokine production                                         | GO_BiologicalProcess-EBI-UniProt-GOA-ACAP-ARAP_08.05.2020_00h00 | 0,007729088 | 0,016887529 | 2,66407E-05 | 7,9034E-05 | [4, 6, 8, 9]                        | Group174 | 18,75 | 3,00  |
| GO:0072602 | interleukin-4 secretion                                                     | GO_BiologicalProcess-EBI-UniProt-GOA-ACAP-ARAP_08.05.2020_00h00 | 0,000575675 | 0,002344345 | 2,66407E-05 | 7,9034E-05 | [4, 5, 6, 7, 8, 9, 10]              | Group174 | 42,86 | 3,00  |
| GO:0097028 | dendritic cell differentiation                                              | GO_BiologicalProcess-EBI-UniProt-GOA-ACAP-ARAP_08.05.2020_00h00 | 0,029624119 | 0,045948595 | 2,66407E-05 | 7,9034E-05 | [5, 6, 7, 8, 9]                     | Group174 | 8,89  | 4,00  |
| GO:0030513 | positive regulation of BMP signaling pathway                                | GO_BiologicalProcess-EBI-UniProt-GOA-ACAP-ARAP_08.05.2020_00h00 | 0,016912684 | 0,030253155 | 2,66407E-05 | 7,9034E-05 | [5, 6, 7, 8, 9, 10]                 | Group174 | 10,53 | 4,00  |
| GO:0051091 | positive regulation of DNA-binding transcription factor activity            | GO_BiologicalProcess-EBI-UniProt-GOA-ACAP-ARAP_08.05.2020_00h00 | 0,018849541 | 0,03297808  | 2,66407E-05 | 7,9034E-05 | [2, 3, 4, 7, 8, 9, 10, 11, 12, 13]  | Group174 | 4,90  | 14,00 |
| GO:0051092 | positive regulation of NF-kappaB transcription factor activity              | GO_BiologicalProcess-EBI-UniProt-GOA-ACAP-ARAP_08.05.2020_00h00 | 0,012154936 | 0,023885572 | 2,66407E-05 | 7,9034E-05 | [3, 4, 5, 8, 9, 10, 11, 12, 13, 14] | Group174 | 6,02  | 10,00 |
| GO:0090559 | regulation of membrane permeability                                         | GO_BiologicalProcess-EBI-UniProt-GOA-ACAP-ARAP_08.05.2020_00h00 | 0,030644687 | 0,046923146 | 2,84964E-05 | 8,1812E-05 | [3]                                 | Group131 | 6,67  | 6,00  |
| GO:0001836 | release of cytochrome c from mitochondria                                   | GO_BiologicalProcess-EBI-UniProt-GOA-ACAP-ARAP_08.05.2020_00h00 | 0,001802429 | 0,005618646 | 2,84964E-05 | 8,1812E-05 | [4, 5, 6, 7]                        | Group131 | 10,45 | 7,00  |
| GO:1903747 | regulation of establishment of protein localization to mitochondrion        | GO_BiologicalProcess-EBI-UniProt-GOA-ACAP-ARAP_08.05.2020_00h00 | 0,016363574 | 0,029491413 | 2,84964E-05 | 8,1812E-05 | [5, 6, 7, 8]                        | Group131 | 7,69  | 6,00  |
| GO:0097153 | cysteine-type endopeptidase activity involved in apoptotic process          | GO_BiologicalProcess-EBI-UniProt-GOA-ACAP-ARAP_08.05.2020_00h00 | 0,000249894 | 0,001232725 | 2,84964E-05 | 8,1812E-05 | [5, 9, 10]                          | Group131 | 6,97  | 17,00 |

|            |                                                                                           |                                                                 |             |             |             |            |                          |          |       |       |
|------------|-------------------------------------------------------------------------------------------|-----------------------------------------------------------------|-------------|-------------|-------------|------------|--------------------------|----------|-------|-------|
| GO:0043281 | regulation of cysteine-type endopeptidase activity involved in apoptotic process          | GO_BiologicalProcess-EBI-UniProt-GOA-ACAP-ARAP_08.05.2020_00h00 | 0,000159916 | 0,000884625 | 2,84964E-05 | 8,1812E-05 | [6, 7, 8, 9, 10, 11]     | Group131 | 7,23  | 17,00 |
| GO:0043154 | negative regulation of cysteine-type endopeptidase activity involved in apoptotic process | GO_BiologicalProcess-EBI-UniProt-GOA-ACAP-ARAP_08.05.2020_00h00 | 0,000993196 | 0,003468936 | 2,84964E-05 | 8,1812E-05 | [6, 7, 8, 9, 10, 11, 12] | Group131 | 9,28  | 9,00  |
| GO:0006914 | autophagy                                                                                 | GO_BiologicalProcess-EBI-UniProt-GOA-ACAP-ARAP_08.05.2020_00h00 | 0,030111073 | 0,046254087 | 3,29155E-05 | 9,2999E-05 | [3, 4]                   | Group162 | 4,04  | 22,00 |
| GO:0009894 | regulation of catabolic process                                                           | GO_BiologicalProcess-EBI-UniProt-GOA-ACAP-ARAP_08.05.2020_00h00 | 0,002341402 | 0,006810703 | 3,29155E-05 | 9,2999E-05 | [3, 4]                   | Group162 | 4,08  | 44,00 |
| GO:0009057 | macromolecule catabolic process                                                           | GO_BiologicalProcess-EBI-UniProt-GOA-ACAP-ARAP_08.05.2020_00h00 | 0,000587955 | 0,002364171 | 3,29155E-05 | 9,2999E-05 | [4]                      | Group162 | 4,01  | 60,00 |
| GO:0009895 | negative regulation of catabolic process                                                  | GO_BiologicalProcess-EBI-UniProt-GOA-ACAP-ARAP_08.05.2020_00h00 | 0,004089869 | 0,010139908 | 3,29155E-05 | 9,2999E-05 | [3, 4, 5]                | Group162 | 5,26  | 18,00 |
| GO:0030163 | protein catabolic process                                                                 | GO_BiologicalProcess-EBI-UniProt-GOA-ACAP-ARAP_08.05.2020_00h00 | 0,003023085 | 0,008126664 | 3,29155E-05 | 9,2999E-05 | [4, 5]                   | Group162 | 4,10  | 41,00 |
| GO:0031329 | regulation of cellular catabolic process                                                  | GO_BiologicalProcess-EBI-UniProt-GOA-ACAP-ARAP_08.05.2020_00h00 | 0,00275227  | 0,007656751 | 3,29155E-05 | 9,2999E-05 | [4, 5]                   | Group162 | 4,21  | 38,00 |
| GO:0044265 | cellular macromolecule catabolic process                                                  | GO_BiologicalProcess-EBI-UniProt-GOA-ACAP-ARAP_08.05.2020_00h00 | 0,000537689 | 0,002237255 | 3,29155E-05 | 9,2999E-05 | [4, 5]                   | Group162 | 4,19  | 52,00 |
| GO:0031330 | negative regulation of cellular catabolic process                                         | GO_BiologicalProcess-EBI-UniProt-GOA-ACAP-ARAP_08.05.2020_00h00 | 0,006713833 | 0,015047162 | 3,29155E-05 | 9,2999E-05 | [4, 5, 6]                | Group162 | 5,40  | 15,00 |
| GO:0010608 | posttranscriptional regulation of gene expression                                         | GO_BiologicalProcess-EBI-UniProt-GOA-ACAP-ARAP_08.05.2020_00h00 | 0,000370525 | 0,001688533 | 3,29155E-05 | 9,2999E-05 | [5, 6]                   | Group162 | 4,89  | 34,00 |
| GO:0043487 | regulation of RNA stability                                                               | GO_BiologicalProcess-EBI-UniProt-GOA-ACAP-ARAP_08.05.2020_00h00 | 0,014361648 | 0,026584327 | 3,29155E-05 | 9,2999E-05 | [3, 5, 6, 7, 8]          | Group162 | 5,61  | 11,00 |
| GO:0006401 | RNA catabolic process                                                                     | GO_BiologicalProcess-EBI-UniProt-GOA-ACAP-ARAP_08.05.2020_00h00 | 0,009984245 | 0,020460218 | 3,29155E-05 | 9,2999E-05 | [5, 6, 7]                | Group162 | 4,64  | 20,00 |
| GO:0007264 | small GTPase mediated signal transduction                                                 | GO_BiologicalProcess-EBI-UniProt-GOA-ACAP-ARAP_08.05.2020_00h00 | 0,002490827 | 0,007158323 | 3,86397E-05 | 0,00010747 | [4, 5, 6]                | Group120 | 4,65  | 28,00 |
| GO:0043087 | regulation of GTPase activity                                                             | GO_BiologicalProcess-EBI-UniProt-GOA-ACAP-ARAP_08.05.2020_00h00 | 0,000172834 | 0,000924034 | 3,86397E-05 | 0,00010747 | [5]                      | Group120 | 5,53  | 28,00 |
| GO:0051345 | positive regulation of hydrolase activity                                                 | GO_BiologicalProcess-EBI-UniProt-GOA-ACAP-ARAP_08.05.2020_00h00 | 9,69574E-06 | 8,7536E-05  | 3,86397E-05 | 0,00010747 | [5]                      | Group120 | 5,30  | 43,00 |
| GO:0007265 | Ras protein signal transduction                                                           | GO_BiologicalProcess-EBI-UniProt-GOA-ACAP-ARAP_08.05.2020_00h00 | 0,009073091 | 0,019167656 | 3,86397E-05 | 0,00010747 | [5, 6, 7]                | Group120 | 4,68  | 20,00 |
| GO:0043547 | positive regulation of GTPase activity                                                    | GO_BiologicalProcess-EBI-UniProt-GOA-ACAP-ARAP_08.05.2020_00h00 | 0,000437988 | 0,001896626 | 3,86397E-05 | 0,00010747 | [6]                      | Group120 | 5,58  | 24,00 |
| GO:0005096 | GTPase activator activity                                                                 | GO_BiologicalProcess-EBI-UniProt-GOA-ACAP-ARAP_08.05.2020_00h00 | 0,004219768 | 0,010354661 | 3,86397E-05 | 0,00010747 | [6, 7]                   | Group120 | 5,52  | 16,00 |
| GO:0007492 | endoderm development                                                                      | GO_BiologicalProcess-EBI-UniProt-GOA-ACAP-ARAP_08.05.2020_00h00 | 0,000448379 | 0,001924211 | 4,22951E-05 | 0,00011582 | [4]                      | Group153 | 10,34 | 9,00  |
| GO:0048598 | embryonic morphogenesis                                                                   | GO_BiologicalProcess-EBI-UniProt-GOA-ACAP-ARAP_08.05.2020_00h00 | 0,000934627 | 0,003362548 | 4,22951E-05 | 0,00011582 | [3, 4, 5]                | Group153 | 4,79  | 31,00 |
| GO:0001704 | formation of primary germ layer                                                           | GO_BiologicalProcess-EBI-UniProt-GOA-ACAP-ARAP_08.05.2020_00h00 | 0,008327947 | 0,017869608 | 4,22951E-05 | 0,00011582 | [3, 4, 5, 6, 7]          | Group153 | 6,77  | 9,00  |

|            |                                                       |                                                                 |             |             |             |            |                          |          |       |       |
|------------|-------------------------------------------------------|-----------------------------------------------------------------|-------------|-------------|-------------|------------|--------------------------|----------|-------|-------|
| GO:0007369 | gastrulation                                          | GO_BiologicalProcess-EBI-UniProt-GOA-ACAP-ARAP_08.05.2020_00h00 | 0,00706902  | 0,015696175 | 4,22951E-05 | 0,00011582 | [4, 5, 6]                | Group153 | 5,94  | 12,00 |
| GO:0034446 | substrate adhesion-dependent cell spreading           | GO_BiologicalProcess-EBI-UniProt-GOA-ACAP-ARAP_08.05.2020_00h00 | 0,007866058 | 0,017108677 | 4,22951E-05 | 0,00011582 | [4, 5, 6]                | Group153 | 7,34  | 8,00  |
| GO:0085029 | extracellular matrix assembly                         | GO_BiologicalProcess-EBI-UniProt-GOA-ACAP-ARAP_08.05.2020_00h00 | 0,001065304 | 0,003680489 | 4,22951E-05 | 0,00011582 | [5, 6]                   | Group153 | 13,33 | 6,00  |
| GO:0001706 | endoderm formation                                    | GO_BiologicalProcess-EBI-UniProt-GOA-ACAP-ARAP_08.05.2020_00h00 | 0,000936067 | 0,003342597 | 4,22951E-05 | 0,00011582 | [4, 5, 6, 7, 8]          | Group153 | 11,67 | 7,00  |
| GO:0035987 | endodermal cell differentiation                       | GO_BiologicalProcess-EBI-UniProt-GOA-ACAP-ARAP_08.05.2020_00h00 | 0,009662041 | 0,020057641 | 4,22951E-05 | 0,00011582 | [4, 5, 6, 7, 8, 9]       | Group153 | 10,00 | 5,00  |
| GO:0070831 | basement membrane assembly                            | GO_BiologicalProcess-EBI-UniProt-GOA-ACAP-ARAP_08.05.2020_00h00 | 0,009205425 | 0,019319279 | 4,22951E-05 | 0,00011582 | [6, 7]                   | Group153 | 17,65 | 3,00  |
| GO:0031581 | hemidesmosome assembly                                | GO_BiologicalProcess-EBI-UniProt-GOA-ACAP-ARAP_08.05.2020_00h00 | 1,29834E-05 | 0,000111938 | 4,22951E-05 | 0,00011582 | [7]                      | Group153 | 38,46 | 5,00  |
| GO:0010812 | negative regulation of cell-substrate adhesion        | GO_BiologicalProcess-EBI-UniProt-GOA-ACAP-ARAP_08.05.2020_00h00 | 0,032554209 | 0,04921703  | 5,06855E-05 | 0,0001367  | [4, 5, 6]                | Group078 | 7,35  | 5,00  |
| GO:0051017 | actin filament bundle assembly                        | GO_BiologicalProcess-EBI-UniProt-GOA-ACAP-ARAP_08.05.2020_00h00 | 2,96766E-05 | 0,000225401 | 5,06855E-05 | 0,0001367  | [5, 6, 7, 9]             | Group078 | 9,09  | 15,00 |
| GO:0032231 | regulation of actin filament bundle assembly          | GO_BiologicalProcess-EBI-UniProt-GOA-ACAP-ARAP_08.05.2020_00h00 | 5,44583E-06 | 5,48596E-05 | 5,06855E-05 | 0,0001367  | [4, 5, 6, 7, 8, 9, 10]   | Group078 | 11,93 | 13,00 |
| GO:0032232 | negative regulation of actin filament bundle assembly | GO_BiologicalProcess-EBI-UniProt-GOA-ACAP-ARAP_08.05.2020_00h00 | 0,010381774 | 0,021094177 | 5,06855E-05 | 0,0001367  | [5, 6, 7, 8, 9, 10, 11]  | Group078 | 12,12 | 4,00  |
| GO:0031644 | regulation of nervous system process                  | GO_BiologicalProcess-EBI-UniProt-GOA-ACAP-ARAP_08.05.2020_00h00 | 0,003465883 | 0,008988754 | 6,46096E-05 | 0,00017165 | [4, 5]                   | Group158 | 6,83  | 11,00 |
| GO:0031646 | positive regulation of nervous system process         | GO_BiologicalProcess-EBI-UniProt-GOA-ACAP-ARAP_08.05.2020_00h00 | 0,000627276 | 0,00248059  | 6,46096E-05 | 0,00017165 | [3, 4, 5, 6]             | Group158 | 10,96 | 8,00  |
| GO:1901890 | positive regulation of cell junction assembly         | GO_BiologicalProcess-EBI-UniProt-GOA-ACAP-ARAP_08.05.2020_00h00 | 0,023341313 | 0,038579684 | 6,46096E-05 | 0,00017165 | [4, 5, 6, 7]             | Group158 | 6,48  | 7,00  |
| GO:0050806 | positive regulation of synaptic transmission          | GO_BiologicalProcess-EBI-UniProt-GOA-ACAP-ARAP_08.05.2020_00h00 | 0,010380722 | 0,021136915 | 6,46096E-05 | 0,00017165 | [3, 4, 5, 6, 7, 8, 9]    | Group158 | 5,88  | 11,00 |
| GO:0099068 | postsynapse assembly                                  | GO_BiologicalProcess-EBI-UniProt-GOA-ACAP-ARAP_08.05.2020_00h00 | 0,009311849 | 0,0194149   | 6,46096E-05 | 0,00017165 | [5, 6, 7]                | Group158 | 12,50 | 4,00  |
| GO:0106027 | neuron projection organization                        | GO_BiologicalProcess-EBI-UniProt-GOA-ACAP-ARAP_08.05.2020_00h00 | 0,015182317 | 0,02772801  | 6,46096E-05 | 0,00017165 | [6]                      | Group158 | 7,07  | 7,00  |
| GO:1904646 | cellular response to amyloid-beta                     | GO_BiologicalProcess-EBI-UniProt-GOA-ACAP-ARAP_08.05.2020_00h00 | 0,018466409 | 0,032485943 | 6,46096E-05 | 0,00017165 | [6, 7]                   | Group158 | 10,26 | 4,00  |
| GO:0060291 | long-term synaptic potentiation                       | GO_BiologicalProcess-EBI-UniProt-GOA-ACAP-ARAP_08.05.2020_00h00 | 0,012985187 | 0,02500367  | 6,46096E-05 | 0,00017165 | [4, 5, 6, 7, 8, 9, 10]   | Group158 | 7,29  | 7,00  |
| GO:0098815 | modulation of excitatory postsynaptic potential       | GO_BiologicalProcess-EBI-UniProt-GOA-ACAP-ARAP_08.05.2020_00h00 | 0,008146646 | 0,017638776 | 6,46096E-05 | 0,00017165 | [4, 5, 6, 7, 8, 9, 10]   | Group158 | 10,42 | 5,00  |
| GO:0060996 | dendritic spine development                           | GO_BiologicalProcess-EBI-UniProt-GOA-ACAP-ARAP_08.05.2020_00h00 | 0,031476401 | 0,047890171 | 6,46096E-05 | 0,00017165 | [3, 4, 7, 8, 10, 11, 12] | Group158 | 6,09  | 7,00  |
| GO:2001257 | regulation of cation channel activity                 | GO_BiologicalProcess-EBI-UniProt-GOA-ACAP-ARAP_08.05.2020_00h00 | 0,002512984 | 0,007178881 | 6,46096E-05 | 0,00017165 | [6, 7, 8, 9, 10]         | Group158 | 6,47  | 13,00 |
| GO:0019637 | organophosphate metabolic process                     | GO_BiologicalProcess-EBI-UniProt-GOA-ACAP-ARAP_08.05.2020_00h00 | 0,000611052 | 0,002436569 | 7,36423E-05 | 0,00019277 | [3, 4]                   | Group124 | 4,26  | 48,00 |

|            |                                                                                           |                                                                 |             |             |             |            |                                 |          |       |       |
|------------|-------------------------------------------------------------------------------------------|-----------------------------------------------------------------|-------------|-------------|-------------|------------|---------------------------------|----------|-------|-------|
| GO:0055086 | nucleobase-containing small molecule metabolic process                                    | GO_BiologicalProcess-EBI-UniProt-GOA-ACAP-ARAP_08.05.2020_00h00 | 0,003933324 | 0,009853902 | 7,36423E-05 | 0,00019277 | [3, 4, 5]                       | Group124 | 4,41  | 30,00 |
| GO:0090407 | organophosphate biosynthetic process                                                      | GO_BiologicalProcess-EBI-UniProt-GOA-ACAP-ARAP_08.05.2020_00h00 | 0,000779392 | 0,002936529 | 7,36423E-05 | 0,00019277 | [4, 5]                          | Group124 | 4,79  | 32,00 |
| GO:0006140 | regulation of nucleotide metabolic process                                                | GO_BiologicalProcess-EBI-UniProt-GOA-ACAP-ARAP_08.05.2020_00h00 | 0,023751667 | 0,039055575 | 7,36423E-05 | 0,00019277 | [4, 5, 6, 7, 8]                 | Group124 | 6,02  | 8,00  |
| GO:0009117 | nucleotide metabolic process                                                              | GO_BiologicalProcess-EBI-UniProt-GOA-ACAP-ARAP_08.05.2020_00h00 | 0,022016035 | 0,036963765 | 7,36423E-05 | 0,00019277 | [5, 6, 7]                       | Group124 | 4,07  | 24,00 |
| GO:0009179 | purine ribonucleoside diphosphate metabolic process                                       | GO_BiologicalProcess-EBI-UniProt-GOA-ACAP-ARAP_08.05.2020_00h00 | 0,007714132 | 0,01689342  | 7,36423E-05 | 0,00019277 | [7, 8, 9]                       | Group124 | 6,45  | 10,00 |
| GO:0098801 | regulation of renal system process                                                        | GO_BiologicalProcess-EBI-UniProt-GOA-ACAP-ARAP_08.05.2020_00h00 | 0,003317585 | 0,008674669 | 8,34554E-05 | 0,00021529 | [4, 5]                          | Group101 | 12,82 | 5,00  |
| GO:0032715 | negative regulation of interleukin-6 production                                           | GO_BiologicalProcess-EBI-UniProt-GOA-ACAP-ARAP_08.05.2020_00h00 | 0,007454556 | 0,016362408 | 8,34554E-05 | 0,00021529 | [4, 5, 6, 7, 8]                 | Group101 | 10,64 | 5,00  |
| GO:0033135 | regulation of peptidyl-serine phosphorylation                                             | GO_BiologicalProcess-EBI-UniProt-GOA-ACAP-ARAP_08.05.2020_00h00 | 0,011230711 | 0,022437977 | 8,34554E-05 | 0,00021529 | [7, 8, 9, 10]                   | Group101 | 6,10  | 10,00 |
| GO:0043027 | cysteine-type endopeptidase inhibitor activity involved in apoptotic process              | GO_BiologicalProcess-EBI-UniProt-GOA-ACAP-ARAP_08.05.2020_00h00 | 0,032678593 | 0,04924947  | 8,34554E-05 | 0,00021529 | [5, 6, 7, 8, 9, 10, 11, 12, 13] | Group101 | 11,11 | 3,00  |
| GO:0043154 | negative regulation of cysteine-type endopeptidase activity involved in apoptotic process | GO_BiologicalProcess-EBI-UniProt-GOA-ACAP-ARAP_08.05.2020_00h00 | 0,000993196 | 0,003468936 | 8,34554E-05 | 0,00021529 | [6, 7, 8, 9, 10, 11, 12]        | Group101 | 9,28  | 9,00  |
| GO:0001816 | cytokine production                                                                       | GO_BiologicalProcess-EBI-UniProt-GOA-ACAP-ARAP_08.05.2020_00h00 | 0,000179184 | 0,00095266  | 0,000101219 | 0,00025738 | [2, 5]                          | Group123 | 4,75  | 41,00 |
| GO:1904951 | positive regulation of establishment of protein localization                              | GO_BiologicalProcess-EBI-UniProt-GOA-ACAP-ARAP_08.05.2020_00h00 | 0,032269876 | 0,048864357 | 0,000101219 | 0,00025738 | [2, 3, 4, 5, 6]                 | Group123 | 4,05  | 21,00 |
| GO:0001817 | regulation of cytokine production                                                         | GO_BiologicalProcess-EBI-UniProt-GOA-ACAP-ARAP_08.05.2020_00h00 | 0,001565843 | 0,005045494 | 0,000101219 | 0,00025738 | [3, 4, 5, 6]                    | Group123 | 4,46  | 35,00 |
| GO:0032633 | interleukin-4 production                                                                  | GO_BiologicalProcess-EBI-UniProt-GOA-ACAP-ARAP_08.05.2020_00h00 | 0,002621352 | 0,007400101 | 0,000101219 | 0,00025738 | [3, 6]                          | Group123 | 13,51 | 5,00  |
| GO:0009306 | protein secretion                                                                         | GO_BiologicalProcess-EBI-UniProt-GOA-ACAP-ARAP_08.05.2020_00h00 | 0,017033646 | 0,030412685 | 0,000101219 | 0,00025738 | [4, 5, 6, 7, 8]                 | Group123 | 4,05  | 27,00 |
| GO:0050663 | cytokine secretion                                                                        | GO_BiologicalProcess-EBI-UniProt-GOA-ACAP-ARAP_08.05.2020_00h00 | 0,028077139 | 0,044266593 | 0,000101219 | 0,00025738 | [3, 4, 5, 6, 7, 8, 9]           | Group123 | 4,76  | 13,00 |
| GO:0016032 | viral process                                                                             | GO_BiologicalProcess-EBI-UniProt-GOA-ACAP-ARAP_08.05.2020_00h00 | 6,47297E-05 | 0,000427216 | 0,00012331  | 0,00030914 | [3]                             | Group091 | 4,77  | 46,00 |
| GO:0051701 | interaction with host                                                                     | GO_BiologicalProcess-EBI-UniProt-GOA-ACAP-ARAP_08.05.2020_00h00 | 0,013796489 | 0,026041893 | 0,00012331  | 0,00030914 | [3]                             | Group091 | 5,43  | 12,00 |
| GO:0019058 | viral life cycle                                                                          | GO_BiologicalProcess-EBI-UniProt-GOA-ACAP-ARAP_08.05.2020_00h00 | 0,010250798 | 0,020916874 | 0,00012331  | 0,00030914 | [4]                             | Group091 | 4,90  | 17,00 |
| GO:0046718 | viral entry into host cell                                                                | GO_BiologicalProcess-EBI-UniProt-GOA-ACAP-ARAP_08.05.2020_00h00 | 0,023751667 | 0,039055575 | 0,00012331  | 0,00030914 | [5, 6]                          | Group091 | 6,02  | 8,00  |
| GO:0001885 | endothelial cell development                                                              | GO_BiologicalProcess-EBI-UniProt-GOA-ACAP-ARAP_08.05.2020_00h00 | 0,000314285 | 0,001481627 | 0,000126811 | 0,00031351 | [5, 6, 7]                       | Group064 | 12,12 | 8,00  |
| GO:0071287 | cellular response to manganese ion                                                        | GO_BiologicalProcess-EBI-UniProt-GOA-ACAP-ARAP_08.05.2020_00h00 | 0,004184007 | 0,010319832 | 0,000126811 | 0,00031351 | [6]                             | Group064 | 23,08 | 3,00  |
| GO:0071320 | cellular response to cAMP                                                                 | GO_BiologicalProcess-EBI-UniProt-GOA-ACAP-ARAP_08.05.2020_00h00 | 0,003981134 | 0,009921734 | 0,000126811 | 0,00031351 | [5, 6, 7]                       | Group064 | 10,34 | 6,00  |

|            |                                                                                |                                                                 |             |             |             |            |                                                |          |       |       |
|------------|--------------------------------------------------------------------------------|-----------------------------------------------------------------|-------------|-------------|-------------|------------|------------------------------------------------|----------|-------|-------|
| GO:0001935 | endothelial cell proliferation                                                 | GO_BiologicalProcess-EBI-UniProt-GOA-ACAP-ARAP_08.05.2020_00h00 | 0,003633375 | 0,00934715  | 0,000148303 | 0,00036162 | [4]                                            | Group137 | 6,79  | 11,00 |
| GO:0001936 | regulation of endothelial cell proliferation                                   | GO_BiologicalProcess-EBI-UniProt-GOA-ACAP-ARAP_08.05.2020_00h00 | 0,014143549 | 0,026282284 | 0,000148303 | 0,00036162 | [5, 6]                                         | Group137 | 6,21  | 9,00  |
| GO:0040037 | negative regulation of fibroblast growth factor receptor signaling pathway     | GO_BiologicalProcess-EBI-UniProt-GOA-ACAP-ARAP_08.05.2020_00h00 | 0,012620698 | 0,024499003 | 0,000148303 | 0,00036162 | [4, 5, 6, 7, 8, 9, 10]                         | Group137 | 15,79 | 3,00  |
| GO:0070306 | lens fiber cell differentiation                                                | GO_BiologicalProcess-EBI-UniProt-GOA-ACAP-ARAP_08.05.2020_00h00 | 0,015443421 | 0,028044315 | 0,000148303 | 0,00036162 | [4, 5, 6, 8, 9, 10]                            | Group137 | 10,81 | 4,00  |
| GO:0002040 | sprouting angiogenesis                                                         | GO_BiologicalProcess-EBI-UniProt-GOA-ACAP-ARAP_08.05.2020_00h00 | 0,00041584  | 0,001833911 | 0,000148303 | 0,00036162 | [4, 5, 6, 7, 8, 9, 10, 11]                     | Group137 | 8,87  | 11,00 |
| GO:0002043 | blood vessel endothelial cell proliferation involved in sprouting angiogenesis | GO_BiologicalProcess-EBI-UniProt-GOA-ACAP-ARAP_08.05.2020_00h00 | 0,00033793  | 0,001562316 | 0,000148303 | 0,00036162 | [5, 6, 7, 8, 9, 10, 11, 12]                    | Group137 | 20,83 | 5,00  |
| GO:1903670 | regulation of sprouting angiogenesis                                           | GO_BiologicalProcess-EBI-UniProt-GOA-ACAP-ARAP_08.05.2020_00h00 | 0,003441989 | 0,008951043 | 0,000148303 | 0,00036162 | [5, 6, 7, 8, 9, 10, 11, 12]                    | Group137 | 9,33  | 7,00  |
| GO:0015278 | calcium-release channel activity                                               | GO_BiologicalProcess-EBI-UniProt-GOA-ACAP-ARAP_08.05.2020_00h00 | 0,010487842 | 0,021219587 | 0,000158836 | 0,00038206 | [5, 6, 7, 8, 9, 10, 11, 12, 13, 14, 15]        | Group151 | 9,80  | 5,00  |
| GO:0051281 | positive regulation of release of sequestered calcium ion into cytosol         | GO_BiologicalProcess-EBI-UniProt-GOA-ACAP-ARAP_08.05.2020_00h00 | 0,025549145 | 0,041231927 | 0,000158836 | 0,00038206 | [4, 5, 6, 7, 8, 9, 10, 11, 12, 13, 14, 15, 16] | Group151 | 9,30  | 4,00  |
| GO:0051651 | maintenance of location in cell                                                | GO_BiologicalProcess-EBI-UniProt-GOA-ACAP-ARAP_08.05.2020_00h00 | 0,00192218  | 0,005914877 | 0,000158836 | 0,00038206 | [2, 3, 4]                                      | Group151 | 6,17  | 15,00 |
| GO:0034764 | positive regulation of transmembrane transport                                 | GO_BiologicalProcess-EBI-UniProt-GOA-ACAP-ARAP_08.05.2020_00h00 | 0,031413406 | 0,047870431 | 0,000158836 | 0,00038206 | [3, 4, 5, 6]                                   | Group151 | 4,98  | 11,00 |
| GO:0043270 | positive regulation of ion transport                                           | GO_BiologicalProcess-EBI-UniProt-GOA-ACAP-ARAP_08.05.2020_00h00 | 0,029049521 | 0,045351375 | 0,000158836 | 0,00038206 | [3, 4, 5, 6]                                   | Group151 | 4,62  | 14,00 |
| GO:0051208 | sequestering of calcium ion                                                    | GO_BiologicalProcess-EBI-UniProt-GOA-ACAP-ARAP_08.05.2020_00h00 | 0,000410002 | 0,001824987 | 0,000158836 | 0,00038206 | [3, 4, 5, 8, 10]                               | Group151 | 8,33  | 12,00 |
| GO:0010522 | regulation of calcium ion transport into cytosol                               | GO_BiologicalProcess-EBI-UniProt-GOA-ACAP-ARAP_08.05.2020_00h00 | 0,007866058 | 0,017108677 | 0,000158836 | 0,00038206 | [3, 4, 5, 7, 8, 9, 10, 11, 13]                 | Group151 | 7,34  | 8,00  |
| GO:0060402 | calcium ion transport into cytosol                                             | GO_BiologicalProcess-EBI-UniProt-GOA-ACAP-ARAP_08.05.2020_00h00 | 0,000377397 | 0,001703626 | 0,000158836 | 0,00038206 | [4, 10, 12]                                    | Group151 | 7,57  | 14,00 |
| GO:0051209 | release of sequestered calcium ion into cytosol                                | GO_BiologicalProcess-EBI-UniProt-GOA-ACAP-ARAP_08.05.2020_00h00 | 0,0002773   | 0,001333548 | 0,000158836 | 0,00038206 | [4, 5, 6, 7, 8, 10, 11, 12, 13, 14]            | Group151 | 8,70  | 12,00 |
| GO:1903053 | regulation of extracellular matrix organization                                | GO_BiologicalProcess-EBI-UniProt-GOA-ACAP-ARAP_08.05.2020_00h00 | 0,006195141 | 0,01411607  | 0,000184808 | 0,00043861 | [4, 5, 6]                                      | Group067 | 11,11 | 5,00  |
| GO:0022617 | extracellular matrix disassembly                                               | GO_BiologicalProcess-EBI-UniProt-GOA-ACAP-ARAP_08.05.2020_00h00 | 0,000448379 | 0,001924211 | 0,000184808 | 0,00043861 | [5, 6]                                         | Group067 | 10,34 | 9,00  |
| GO:0010715 | regulation of extracellular matrix disassembly                                 | GO_BiologicalProcess-EBI-UniProt-GOA-ACAP-ARAP_08.05.2020_00h00 | 0,012620698 | 0,024499003 | 0,000184808 | 0,00043861 | [5, 6, 7]                                      | Group067 | 15,79 | 3,00  |
| GO:0040008 | regulation of growth                                                           | GO_BiologicalProcess-EBI-UniProt-GOA-ACAP-ARAP_08.05.2020_00h00 | 0,002803932 | 0,007710812 | 0,000192469 | 0,00045078 | [2, 3]                                         | Group166 | 4,42  | 32,00 |
| GO:0045927 | positive regulation of growth                                                  | GO_BiologicalProcess-EBI-UniProt-GOA-ACAP-ARAP_08.05.2020_00h00 | 0,01690525  | 0,030296486 | 0,000192469 | 0,00045078 | [2, 3, 4]                                      | Group166 | 4,96  | 14,00 |
| GO:0048638 | regulation of developmental growth                                             | GO_BiologicalProcess-EBI-UniProt-GOA-ACAP-ARAP_08.05.2020_00h00 | 0,014668097 | 0,026943127 | 0,000192469 | 0,00045078 | [3, 4]                                         | Group166 | 4,71  | 17,00 |

|            |                                                                                           |                                                                 |             |             |             |            |                                     |          |       |       |
|------------|-------------------------------------------------------------------------------------------|-----------------------------------------------------------------|-------------|-------------|-------------|------------|-------------------------------------|----------|-------|-------|
| GO:0001558 | regulation of cell growth                                                                 | GO_BiologicalProcess-EBI-UniProt-GOA-ACAP-ARAP_08.05.2020_00h00 | 0,028421564 | 0,044662461 | 0,000192469 | 0,00045078 | [3, 4, 5]                           | Group166 | 4,22  | 19,00 |
| GO:0046620 | regulation of organ growth                                                                | GO_BiologicalProcess-EBI-UniProt-GOA-ACAP-ARAP_08.05.2020_00h00 | 0,024403341 | 0,039853238 | 0,000192469 | 0,00045078 | [3, 4, 5]                           | Group166 | 6,42  | 7,00  |
| GO:0048588 | developmental cell growth                                                                 | GO_BiologicalProcess-EBI-UniProt-GOA-ACAP-ARAP_08.05.2020_00h00 | 0,01525921  | 0,027815361 | 0,000192469 | 0,00045078 | [3, 4, 5]                           | Group166 | 5,18  | 13,00 |
| GO:0030307 | positive regulation of cell growth                                                        | GO_BiologicalProcess-EBI-UniProt-GOA-ACAP-ARAP_08.05.2020_00h00 | 0,020310845 | 0,034771878 | 0,000192469 | 0,00045078 | [3, 4, 5, 6]                        | Group166 | 5,56  | 10,00 |
| GO:0120039 | plasma membrane bounded cell projection morphogenesis                                     | GO_BiologicalProcess-EBI-UniProt-GOA-ACAP-ARAP_08.05.2020_00h00 | 0,009786652 | 0,020228567 | 0,000192469 | 0,00045078 | [5, 6, 7]                           | Group166 | 4,12  | 30,00 |
| GO:0055024 | regulation of cardiac muscle tissue development                                           | GO_BiologicalProcess-EBI-UniProt-GOA-ACAP-ARAP_08.05.2020_00h00 | 0,008760029 | 0,018588355 | 0,000192469 | 0,00045078 | [5, 6, 7, 8, 9]                     | Group166 | 7,87  | 7,00  |
| GO:0048667 | cell morphogenesis involved in neuron differentiation                                     | GO_BiologicalProcess-EBI-UniProt-GOA-ACAP-ARAP_08.05.2020_00h00 | 0,006632533 | 0,014899846 | 0,000192469 | 0,00045078 | [5, 6, 8, 9, 10]                    | Group166 | 4,33  | 28,00 |
| GO:0060043 | regulation of cardiac muscle cell proliferation                                           | GO_BiologicalProcess-EBI-UniProt-GOA-ACAP-ARAP_08.05.2020_00h00 | 0,031797417 | 0,04830179  | 0,000192469 | 0,00045078 | [4, 5, 6, 7, 8, 9, 10, 11]          | Group166 | 8,70  | 4,00  |
| GO:0061564 | axon development                                                                          | GO_BiologicalProcess-EBI-UniProt-GOA-ACAP-ARAP_08.05.2020_00h00 | 0,00784214  | 0,01709551  | 0,000192469 | 0,00045078 | [6, 7, 9, 10, 11]                   | Group166 | 4,42  | 25,00 |
| GO:0043154 | negative regulation of cysteine-type endopeptidase activity involved in apoptotic process | GO_BiologicalProcess-EBI-UniProt-GOA-ACAP-ARAP_08.05.2020_00h00 | 0,000993196 | 0,003468936 | 0,000192469 | 0,00045078 | [6, 7, 8, 9, 10, 11, 12]            | Group166 | 9,28  | 9,00  |
| GO:0001816 | cytokine production                                                                       | GO_BiologicalProcess-EBI-UniProt-GOA-ACAP-ARAP_08.05.2020_00h00 | 0,000179184 | 0,00095266  | 0,000205909 | 0,000476   | [2, 5]                              | Group113 | 4,75  | 41,00 |
| GO:0001817 | regulation of cytokine production                                                         | GO_BiologicalProcess-EBI-UniProt-GOA-ACAP-ARAP_08.05.2020_00h00 | 0,001565843 | 0,005045494 | 0,000205909 | 0,000476   | [3, 4, 5, 6]                        | Group113 | 4,46  | 35,00 |
| GO:0001819 | positive regulation of cytokine production                                                | GO_BiologicalProcess-EBI-UniProt-GOA-ACAP-ARAP_08.05.2020_00h00 | 0,013490905 | 0,025718717 | 0,000205909 | 0,000476   | [3, 4, 5, 6, 7]                     | Group113 | 4,37  | 22,00 |
| GO:0051091 | positive regulation of DNA-binding transcription factor activity                          | GO_BiologicalProcess-EBI-UniProt-GOA-ACAP-ARAP_08.05.2020_00h00 | 0,018849541 | 0,03297808  | 0,000205909 | 0,000476   | [2, 3, 4, 7, 8, 9, 10, 11, 12, 13]  | Group113 | 4,90  | 14,00 |
| GO:0051092 | positive regulation of NF-kappaB transcription factor activity                            | GO_BiologicalProcess-EBI-UniProt-GOA-ACAP-ARAP_08.05.2020_00h00 | 0,012154936 | 0,023885572 | 0,000205909 | 0,000476   | [3, 4, 5, 8, 9, 10, 11, 12, 13, 14] | Group113 | 6,02  | 10,00 |
| GO:0033002 | muscle cell proliferation                                                                 | GO_BiologicalProcess-EBI-UniProt-GOA-ACAP-ARAP_08.05.2020_00h00 | 3,12928E-05 | 0,000233963 | 0,000281373 | 0,00064211 | [3]                                 | Group156 | 8,25  | 17,00 |
| GO:0035019 | somatic stem cell population maintenance                                                  | GO_BiologicalProcess-EBI-UniProt-GOA-ACAP-ARAP_08.05.2020_00h00 | 0,020465165 | 0,034911167 | 0,000281373 | 0,00064211 | [3, 4]                              | Group156 | 7,32  | 6,00  |
| GO:0046620 | regulation of organ growth                                                                | GO_BiologicalProcess-EBI-UniProt-GOA-ACAP-ARAP_08.05.2020_00h00 | 0,024403341 | 0,039853238 | 0,000281373 | 0,00064211 | [3, 4, 5]                           | Group156 | 6,42  | 7,00  |
| GO:0050679 | positive regulation of epithelial cell proliferation                                      | GO_BiologicalProcess-EBI-UniProt-GOA-ACAP-ARAP_08.05.2020_00h00 | 0,00018895  | 0,000982745 | 0,000281373 | 0,00064211 | [4, 5, 6]                           | Group156 | 7,41  | 16,00 |
| GO:0101023 | vascular endothelial cell proliferation                                                   | GO_BiologicalProcess-EBI-UniProt-GOA-ACAP-ARAP_08.05.2020_00h00 | 0,026696119 | 0,042651396 | 0,000281373 | 0,00064211 | [5]                                 | Group156 | 12,00 | 3,00  |
| GO:0055024 | regulation of cardiac muscle tissue development                                           | GO_BiologicalProcess-EBI-UniProt-GOA-ACAP-ARAP_08.05.2020_00h00 | 0,008760029 | 0,018588355 | 0,000281373 | 0,00064211 | [5, 6, 7, 8, 9]                     | Group156 | 7,87  | 7,00  |
| GO:0060487 | lung epithelial cell differentiation                                                      | GO_BiologicalProcess-EBI-UniProt-GOA-ACAP-ARAP_08.05.2020_00h00 | 0,018932438 | 0,03306267  | 0,000281373 | 0,00064211 | [5, 6, 7, 8, 9]                     | Group156 | 13,64 | 3,00  |
| GO:1905564 | positive regulation of vascular endothelial cell proliferation                            | GO_BiologicalProcess-EBI-UniProt-GOA-ACAP-ARAP_08.05.2020_00h00 | 0,014564467 | 0,026855865 | 0,000281373 | 0,00064211 | [6, 7, 8]                           | Group156 | 15,00 | 3,00  |



|            |                                                                            |                                                                 |             |             |             |            |                             |          |       |       |
|------------|----------------------------------------------------------------------------|-----------------------------------------------------------------|-------------|-------------|-------------|------------|-----------------------------|----------|-------|-------|
| GO:0060043 | regulation of cardiac muscle cell proliferation                            | GO_BiologicalProcess-EBI-UniProt-GOA-ACAP-ARAP_08.05.2020_00h00 | 0,031797417 | 0,04830179  | 0,000281373 | 0,00064211 | [4, 5, 6, 7, 8, 9, 10, 11]  | Group156 | 8,70  | 4,00  |
| GO:2001169 | regulation of ATP biosynthetic process                                     | GO_BiologicalProcess-EBI-UniProt-GOA-ACAP-ARAP_08.05.2020_00h00 | 0,014564467 | 0,026855865 | 0,000281373 | 0,00064211 | [4, 5, 7, 8, 9, 10, 11, 12] | Group156 | 15,00 | 3,00  |
| GO:1903320 | regulation of protein modification by small protein conjugation or removal | GO_BiologicalProcess-EBI-UniProt-GOA-ACAP-ARAP_08.05.2020_00h00 | 0,000302301 | 0,001439316 | 0,000302301 | 0,00068113 | [6, 7, 8]                   | Group052 | 6,85  | 17,00 |
| GO:0031398 | positive regulation of protein ubiquitination                              | GO_BiologicalProcess-EBI-UniProt-GOA-ACAP-ARAP_08.05.2020_00h00 | 0,001763233 | 0,005550702 | 0,000302301 | 0,00068113 | [7, 8, 9, 10, 11]           | Group052 | 7,94  | 10,00 |
| GO:0051020 | GTPase binding                                                             | GO_MolecularFunction-EBI-UniProt-GOA-ACAP-ARAP_08.05.2020_00h00 | 0,012022416 | 0,023673771 | 0,000323321 | 0,00071939 | [4]                         | Group106 | 4,26  | 25,00 |
| GO:0005088 | Ras guanyl-nucleotide exchange factor activity                             | GO_BiologicalProcess-EBI-UniProt-GOA-ACAP-ARAP_08.05.2020_00h00 | 0,018565632 | 0,03260057  | 0,000323321 | 0,00071939 | [5]                         | Group106 | 6,30  | 8,00  |
| GO:0031267 | small GTPase binding                                                       | GO_MolecularFunction-EBI-UniProt-GOA-ACAP-ARAP_08.05.2020_00h00 | 0,001787578 | 0,005590562 | 0,000323321 | 0,00071939 | [5]                         | Group106 | 5,12  | 23,00 |
| GO:0043087 | regulation of GTPase activity                                              | GO_BiologicalProcess-EBI-UniProt-GOA-ACAP-ARAP_08.05.2020_00h00 | 0,000172834 | 0,000924034 | 0,000323321 | 0,00071939 | [5]                         | Group106 | 5,53  | 28,00 |
| GO:0043547 | positive regulation of GTPase activity                                     | GO_BiologicalProcess-EBI-UniProt-GOA-ACAP-ARAP_08.05.2020_00h00 | 0,000437988 | 0,001896626 | 0,000323321 | 0,00071939 | [6]                         | Group106 | 5,58  | 24,00 |
| GO:0009894 | regulation of catabolic process                                            | GO_BiologicalProcess-EBI-UniProt-GOA-ACAP-ARAP_08.05.2020_00h00 | 0,002341402 | 0,006810703 | 0,000329505 | 0,0007241  | [3, 4]                      | Group114 | 4,08  | 44,00 |
| GO:0009895 | negative regulation of catabolic process                                   | GO_BiologicalProcess-EBI-UniProt-GOA-ACAP-ARAP_08.05.2020_00h00 | 0,004089869 | 0,010139908 | 0,000329505 | 0,0007241  | [3, 4, 5]                   | Group114 | 5,26  | 18,00 |
| GO:0031329 | regulation of cellular catabolic process                                   | GO_BiologicalProcess-EBI-UniProt-GOA-ACAP-ARAP_08.05.2020_00h00 | 0,00275227  | 0,007656751 | 0,000329505 | 0,0007241  | [4, 5]                      | Group114 | 4,21  | 38,00 |
| GO:0031330 | negative regulation of cellular catabolic process                          | GO_BiologicalProcess-EBI-UniProt-GOA-ACAP-ARAP_08.05.2020_00h00 | 0,006713833 | 0,015047162 | 0,000329505 | 0,0007241  | [4, 5, 6]                   | Group114 | 5,40  | 15,00 |
| GO:0042177 | negative regulation of protein catabolic process                           | GO_BiologicalProcess-EBI-UniProt-GOA-ACAP-ARAP_08.05.2020_00h00 | 0,032142218 | 0,048748184 | 0,000329505 | 0,0007241  | [4, 5, 6, 7]                | Group114 | 5,67  | 8,00  |
| GO:0045861 | negative regulation of proteolysis                                         | GO_BiologicalProcess-EBI-UniProt-GOA-ACAP-ARAP_08.05.2020_00h00 | 0,006054374 | 0,013861331 | 0,000329505 | 0,0007241  | [5, 6, 7, 8]                | Group114 | 4,96  | 19,00 |
| GO:0010035 | response to inorganic substance                                            | GO_BiologicalProcess-EBI-UniProt-GOA-ACAP-ARAP_08.05.2020_00h00 | 0,01391736  | 0,026218332 | 0,000336764 | 0,00073102 | [3]                         | Group170 | 4,16  | 26,00 |
| GO:0042493 | response to drug                                                           | GO_BiologicalProcess-EBI-UniProt-GOA-ACAP-ARAP_08.05.2020_00h00 | 0,000187942 | 0,000982845 | 0,000336764 | 0,00073102 | [3]                         | Group170 | 4,38  | 52,00 |
| GO:0046677 | response to antibiotic                                                     | GO_BiologicalProcess-EBI-UniProt-GOA-ACAP-ARAP_08.05.2020_00h00 | 0,003973101 | 0,009927566 | 0,000336764 | 0,00073102 | [3]                         | Group170 | 5,16  | 19,00 |
| GO:0071216 | cellular response to biotic stimulus                                       | GO_BiologicalProcess-EBI-UniProt-GOA-ACAP-ARAP_08.05.2020_00h00 | 0,008525003 | 0,018251516 | 0,000336764 | 0,00073102 | [3]                         | Group170 | 5,41  | 14,00 |
| GO:0000302 | response to reactive oxygen species                                        | GO_BiologicalProcess-EBI-UniProt-GOA-ACAP-ARAP_08.05.2020_00h00 | 0,033104222 | 0,049656335 | 0,000336764 | 0,00073102 | [4]                         | Group170 | 4,78  | 12,00 |
| GO:0062197 | cellular response to chemical stress                                       | GO_BiologicalProcess-EBI-UniProt-GOA-ACAP-ARAP_08.05.2020_00h00 | 0,013435385 | 0,025715327 | 0,000336764 | 0,00073102 | [4]                         | Group170 | 4,66  | 18,00 |
| GO:0071236 | cellular response to antibiotic                                            | GO_BiologicalProcess-EBI-UniProt-GOA-ACAP-ARAP_08.05.2020_00h00 | 0,011685916 | 0,023058603 | 0,000336764 | 0,00073102 | [4]                         | Group170 | 6,06  | 10,00 |
| GO:0097237 | cellular response to toxic substance                                       | GO_BiologicalProcess-EBI-UniProt-GOA-ACAP-ARAP_08.05.2020_00h00 | 0,015992491 | 0,028931595 | 0,000336764 | 0,00073102 | [4]                         | Group170 | 5,00  | 14,00 |

|            |                                                                              |                                                                 |             |             |             |            |                            |          |       |       |
|------------|------------------------------------------------------------------------------|-----------------------------------------------------------------|-------------|-------------|-------------|------------|----------------------------|----------|-------|-------|
| GO:0042542 | response to hydrogen peroxide                                                | GO_BiologicalProcess-EBI-UniProt-GOA-ACAP-ARAP_08.05.2020_00h00 | 0,02252461  | 0,037685405 | 0,000336764 | 0,00073102 | [4, 5]                     | Group170 | 5,73  | 9,00  |
| GO:0034614 | cellular response to reactive oxygen species                                 | GO_BiologicalProcess-EBI-UniProt-GOA-ACAP-ARAP_08.05.2020_00h00 | 0,01962244  | 0,034081079 | 0,000336764 | 0,00073102 | [5, 6]                     | Group170 | 5,59  | 10,00 |
| GO:0032715 | negative regulation of interleukin-6 production                              | GO_BiologicalProcess-EBI-UniProt-GOA-ACAP-ARAP_08.05.2020_00h00 | 0,007454556 | 0,016362408 | 0,000336764 | 0,00073102 | [4, 5, 6, 7, 8]            | Group170 | 10,64 | 5,00  |
| GO:0070301 | cellular response to hydrogen peroxide                                       | GO_BiologicalProcess-EBI-UniProt-GOA-ACAP-ARAP_08.05.2020_00h00 | 0,02034726  | 0,034772012 | 0,000336764 | 0,00073102 | [5, 6, 7]                  | Group170 | 6,67  | 7,00  |
| GO:1903556 | negative regulation of tumor necrosis factor superfamily cytokine production | GO_BiologicalProcess-EBI-UniProt-GOA-ACAP-ARAP_08.05.2020_00h00 | 0,029100992 | 0,045283981 | 0,000336764 | 0,00073102 | [4, 5, 6, 7, 8]            | Group170 | 7,58  | 5,00  |
| GO:0071222 | cellular response to lipopolysaccharide                                      | GO_BiologicalProcess-EBI-UniProt-GOA-ACAP-ARAP_08.05.2020_00h00 | 0,006491162 | 0,014651042 | 0,000336764 | 0,00073102 | [5, 6, 8]                  | Group170 | 5,78  | 13,00 |
| GO:0033002 | muscle cell proliferation                                                    | GO_BiologicalProcess-EBI-UniProt-GOA-ACAP-ARAP_08.05.2020_00h00 | 3,12928E-05 | 0,000233963 | 0,000403892 | 0,00086618 | [3]                        | Group157 | 8,25  | 17,00 |
| GO:0045927 | positive regulation of growth                                                | GO_BiologicalProcess-EBI-UniProt-GOA-ACAP-ARAP_08.05.2020_00h00 | 0,01690525  | 0,030296486 | 0,000403892 | 0,00086618 | [2, 3, 4]                  | Group157 | 4,96  | 14,00 |
| GO:0035019 | somatic stem cell population maintenance                                     | GO_BiologicalProcess-EBI-UniProt-GOA-ACAP-ARAP_08.05.2020_00h00 | 0,020465165 | 0,034911167 | 0,000403892 | 0,00086618 | [3, 4]                     | Group157 | 7,32  | 6,00  |
| GO:0048638 | regulation of developmental growth                                           | GO_BiologicalProcess-EBI-UniProt-GOA-ACAP-ARAP_08.05.2020_00h00 | 0,014668097 | 0,026943127 | 0,000403892 | 0,00086618 | [3, 4]                     | Group157 | 4,71  | 17,00 |
| GO:0046620 | regulation of organ growth                                                   | GO_BiologicalProcess-EBI-UniProt-GOA-ACAP-ARAP_08.05.2020_00h00 | 0,024403341 | 0,039853238 | 0,000403892 | 0,00086618 | [3, 4, 5]                  | Group157 | 6,42  | 7,00  |
| GO:0001938 | positive regulation of endothelial cell proliferation                        | GO_BiologicalProcess-EBI-UniProt-GOA-ACAP-ARAP_08.05.2020_00h00 | 0,02131371  | 0,036101274 | 0,000403892 | 0,00086618 | [5, 6, 7]                  | Group157 | 6,60  | 7,00  |
| GO:0002088 | lens development in camera-type eye                                          | GO_BiologicalProcess-EBI-UniProt-GOA-ACAP-ARAP_08.05.2020_00h00 | 0,009845688 | 0,020263061 | 0,000403892 | 0,00086618 | [3, 7, 8, 9]               | Group157 | 7,69  | 7,00  |
| GO:0055024 | regulation of cardiac muscle tissue development                              | GO_BiologicalProcess-EBI-UniProt-GOA-ACAP-ARAP_08.05.2020_00h00 | 0,008760029 | 0,018588355 | 0,000403892 | 0,00086618 | [5, 6, 7, 8, 9]            | Group157 | 7,87  | 7,00  |
| GO:0060043 | regulation of cardiac muscle cell proliferation                              | GO_BiologicalProcess-EBI-UniProt-GOA-ACAP-ARAP_08.05.2020_00h00 | 0,031797417 | 0,04830179  | 0,000403892 | 0,00086618 | [4, 5, 6, 7, 8, 9, 10, 11] | Group157 | 8,70  | 4,00  |
| GO:2000725 | regulation of cardiac muscle cell differentiation                            | GO_BiologicalProcess-EBI-UniProt-GOA-ACAP-ARAP_08.05.2020_00h00 | 0,020105848 | 0,034731582 | 0,000403892 | 0,00086618 | [5, 6, 7, 8, 9, 10]        | Group157 | 10,00 | 4,00  |
| GO:0030856 | regulation of epithelial cell differentiation                                | GO_BiologicalProcess-EBI-UniProt-GOA-ACAP-ARAP_08.05.2020_00h00 | 0,02252461  | 0,037685405 | 0,000427715 | 0,00090635 | [4, 5, 6]                  | Group164 | 5,73  | 9,00  |
| GO:1904019 | epithelial cell apoptotic process                                            | GO_BiologicalProcess-EBI-UniProt-GOA-ACAP-ARAP_08.05.2020_00h00 | 3,38977E-05 | 0,000249539 | 0,000427715 | 0,00090635 | [5]                        | Group164 | 10,81 | 12,00 |
| GO:0030858 | positive regulation of epithelial cell differentiation                       | GO_BiologicalProcess-EBI-UniProt-GOA-ACAP-ARAP_08.05.2020_00h00 | 0,025888894 | 0,041569918 | 0,000427715 | 0,00090635 | [4, 5, 6, 7]               | Group164 | 7,81  | 5,00  |
| GO:0032715 | negative regulation of interleukin-6 production                              | GO_BiologicalProcess-EBI-UniProt-GOA-ACAP-ARAP_08.05.2020_00h00 | 0,007454556 | 0,016362408 | 0,000427715 | 0,00090635 | [4, 5, 6, 7, 8]            | Group164 | 10,64 | 5,00  |
| GO:0071356 | cellular response to tumor necrosis factor                                   | GO_BiologicalProcess-EBI-UniProt-GOA-ACAP-ARAP_08.05.2020_00h00 | 0,012930495 | 0,024948554 | 0,000427715 | 0,00090635 | [6]                        | Group164 | 5,00  | 15,00 |
| GO:0072577 | endothelial cell apoptotic process                                           | GO_BiologicalProcess-EBI-UniProt-GOA-ACAP-ARAP_08.05.2020_00h00 | 0,003648136 | 0,009359963 | 0,000427715 | 0,00090635 | [6]                        | Group164 | 10,53 | 6,00  |
| GO:1903556 | negative regulation of tumor necrosis factor superfamily cytokine production | GO_BiologicalProcess-EBI-UniProt-GOA-ACAP-ARAP_08.05.2020_00h00 | 0,029100992 | 0,045283981 | 0,000427715 | 0,00090635 | [4, 5, 6, 7, 8]            | Group164 | 7,58  | 5,00  |

|            |                                                                                           |                                                                 |             |             |             |            |                                 |          |       |       |
|------------|-------------------------------------------------------------------------------------------|-----------------------------------------------------------------|-------------|-------------|-------------|------------|---------------------------------|----------|-------|-------|
| GO:1904035 | regulation of epithelial cell apoptotic process                                           | GO_BiologicalProcess-EBI-UniProt-GOA-ACAP-ARAP_08.05.2020_00h00 | 9,95666E-05 | 0,000610803 | 0,000427715 | 0,00090635 | [6, 7]                          | Group164 | 11,36 | 10,00 |
| GO:1904036 | negative regulation of epithelial cell apoptotic process                                  | GO_BiologicalProcess-EBI-UniProt-GOA-ACAP-ARAP_08.05.2020_00h00 | 0,000302994 | 0,001435473 | 0,000427715 | 0,00090635 | [6, 7, 8]                       | Group164 | 14,00 | 7,00  |
| GO:0060055 | angiogenesis involved in wound healing                                                    | GO_BiologicalProcess-EBI-UniProt-GOA-ACAP-ARAP_08.05.2020_00h00 | 0,032678593 | 0,04924947  | 0,000427715 | 0,00090635 | [4, 5, 6, 7, 8, 9, 10, 11]      | Group164 | 11,11 | 3,00  |
| GO:2000351 | regulation of endothelial cell apoptotic process                                          | GO_BiologicalProcess-EBI-UniProt-GOA-ACAP-ARAP_08.05.2020_00h00 | 0,002064665 | 0,006272649 | 0,000427715 | 0,00090635 | [7, 8]                          | Group164 | 11,76 | 6,00  |
| GO:2000352 | negative regulation of endothelial cell apoptotic process                                 | GO_BiologicalProcess-EBI-UniProt-GOA-ACAP-ARAP_08.05.2020_00h00 | 0,008316356 | 0,017884837 | 0,000427715 | 0,00090635 | [7, 8, 9]                       | Group164 | 12,90 | 4,00  |
| GO:0019838 | growth factor binding                                                                     | GO_MolecularFunction-EBI-UniProt-GOA-ACAP-ARAP_08.05.2020_00h00 | 0,000592761 | 0,002373526 | 0,000592761 | 0,00124131 | [3]                             | Group071 | 8,00  | 12,00 |
| GO:0005520 | insulin-like growth factor binding                                                        | GO_MolecularFunction-EBI-UniProt-GOA-ACAP-ARAP_08.05.2020_00h00 | 1,53255E-05 | 0,000129792 | 0,000592761 | 0,00124131 | [4]                             | Group071 | 21,88 | 7,00  |
| GO:0031994 | insulin-like growth factor I binding                                                      | GO_MolecularFunction-EBI-UniProt-GOA-ACAP-ARAP_08.05.2020_00h00 | 0,004184007 | 0,010319832 | 0,000592761 | 0,00124131 | [5]                             | Group071 | 23,08 | 3,00  |
| GO:0005165 | neurotrophin receptor binding                                                             | GO_MolecularFunction-EBI-UniProt-GOA-ACAP-ARAP_08.05.2020_00h00 | 0,004184007 | 0,010319832 | 0,000625023 | 0,00129365 | [5]                             | Group070 | 23,08 | 3,00  |
| GO:0030159 | signaling receptor complex adaptor activity                                               | GO_MolecularFunction-EBI-UniProt-GOA-ACAP-ARAP_08.05.2020_00h00 | 0,031797417 | 0,04830179  | 0,000625023 | 0,00129365 | [5]                             | Group070 | 8,70  | 4,00  |
| GO:0038179 | neurotrophin signaling pathway                                                            | GO_BiologicalProcess-EBI-UniProt-GOA-ACAP-ARAP_08.05.2020_00h00 | 0,001065304 | 0,003680489 | 0,000625023 | 0,00129365 | [4, 5, 6]                       | Group070 | 13,33 | 6,00  |
| GO:0018209 | peptidyl-serine modification                                                              | GO_BiologicalProcess-EBI-UniProt-GOA-ACAP-ARAP_08.05.2020_00h00 | 0,000275328 | 0,001337508 | 0,000670247 | 0,00135573 | [7, 8]                          | Group119 | 6,01  | 22,00 |
| GO:0018105 | peptidyl-serine phosphorylation                                                           | GO_BiologicalProcess-EBI-UniProt-GOA-ACAP-ARAP_08.05.2020_00h00 | 0,000650843 | 0,00255269  | 0,000670247 | 0,00135573 | [7, 8, 9]                       | Group119 | 5,90  | 20,00 |
| GO:0010951 | negative regulation of endopeptidase activity                                             | GO_BiologicalProcess-EBI-UniProt-GOA-ACAP-ARAP_08.05.2020_00h00 | 0,013479644 | 0,025748543 | 0,000670247 | 0,00135573 | [7, 8, 9, 10]                   | Group119 | 5,11  | 14,00 |
| GO:0033135 | regulation of peptidyl-serine phosphorylation                                             | GO_BiologicalProcess-EBI-UniProt-GOA-ACAP-ARAP_08.05.2020_00h00 | 0,011230711 | 0,022437977 | 0,000670247 | 0,00135573 | [7, 8, 9, 10]                   | Group119 | 6,10  | 10,00 |
| GO:0043027 | cysteine-type endopeptidase inhibitor activity involved in apoptotic process              | GO_BiologicalProcess-EBI-UniProt-GOA-ACAP-ARAP_08.05.2020_00h00 | 0,032678593 | 0,04924947  | 0,000670247 | 0,00135573 | [5, 6, 7, 8, 9, 10, 11, 12, 13] | Group119 | 11,11 | 3,00  |
| GO:0043154 | negative regulation of cysteine-type endopeptidase activity involved in apoptotic process | GO_BiologicalProcess-EBI-UniProt-GOA-ACAP-ARAP_08.05.2020_00h00 | 0,000993196 | 0,003468936 | 0,000670247 | 0,00135573 | [6, 7, 8, 9, 10, 11, 12]        | Group119 | 9,28  | 9,00  |
| GO:0002088 | lens development in camera-type eye                                                       | GO_BiologicalProcess-EBI-UniProt-GOA-ACAP-ARAP_08.05.2020_00h00 | 0,009845688 | 0,020263061 | 0,000666914 | 0,00136449 | [3, 7, 8, 9]                    | Group062 | 7,69  | 7,00  |
| GO:0070306 | lens fiber cell differentiation                                                           | GO_BiologicalProcess-EBI-UniProt-GOA-ACAP-ARAP_08.05.2020_00h00 | 0,015443421 | 0,028044315 | 0,000666914 | 0,00136449 | [4, 5, 6, 8, 9, 10]             | Group062 | 10,81 | 4,00  |
| GO:0002043 | blood vessel endothelial cell proliferation involved in sprouting angiogenesis            | GO_BiologicalProcess-EBI-UniProt-GOA-ACAP-ARAP_08.05.2020_00h00 | 0,00033793  | 0,001562316 | 0,000666914 | 0,00136449 | [5, 6, 7, 8, 9, 10, 11, 12]     | Group062 | 20,83 | 5,00  |
| GO:0071216 | cellular response to biotic stimulus                                                      | GO_BiologicalProcess-EBI-UniProt-GOA-ACAP-ARAP_08.05.2020_00h00 | 0,008525003 | 0,018251516 | 0,000731504 | 0,00146301 | [3]                             | Group167 | 5,41  | 14,00 |
| GO:0032635 | interleukin-6 production                                                                  | GO_BiologicalProcess-EBI-UniProt-GOA-ACAP-ARAP_08.05.2020_00h00 | 0,001438689 | 0,004715156 | 0,000731504 | 0,00146301 | [3, 6]                          | Group167 | 7,23  | 12,00 |

|            |                                                                              |                                                                 |             |             |             |            |                                 |          |       |       |
|------------|------------------------------------------------------------------------------|-----------------------------------------------------------------|-------------|-------------|-------------|------------|---------------------------------|----------|-------|-------|
| GO:0042542 | response to hydrogen peroxide                                                | GO_BiologicalProcess-EBI-UniProt-GOA-ACAP-ARAP_08.05.2020_00h00 | 0,02252461  | 0,037685405 | 0,000731504 | 0,00146301 | [4, 5]                          | Group167 | 5,73  | 9,00  |
| GO:0032652 | regulation of interleukin-1 production                                       | GO_BiologicalProcess-EBI-UniProt-GOA-ACAP-ARAP_08.05.2020_00h00 | 0,023341313 | 0,038579684 | 0,000731504 | 0,00146301 | [4, 5, 6, 7]                    | Group167 | 6,48  | 7,00  |
| GO:0032675 | regulation of interleukin-6 production                                       | GO_BiologicalProcess-EBI-UniProt-GOA-ACAP-ARAP_08.05.2020_00h00 | 0,000707176 | 0,002707069 | 0,000731504 | 0,00146301 | [4, 5, 6, 7]                    | Group167 | 7,84  | 12,00 |
| GO:0051250 | negative regulation of lymphocyte activation                                 | GO_BiologicalProcess-EBI-UniProt-GOA-ACAP-ARAP_08.05.2020_00h00 | 0,02252461  | 0,037685405 | 0,000731504 | 0,00146301 | [4, 5, 6, 7]                    | Group167 | 5,73  | 9,00  |
| GO:0032715 | negative regulation of interleukin-6 production                              | GO_BiologicalProcess-EBI-UniProt-GOA-ACAP-ARAP_08.05.2020_00h00 | 0,007454556 | 0,016362408 | 0,000731504 | 0,00146301 | [4, 5, 6, 7, 8]                 | Group167 | 10,64 | 5,00  |
| GO:0070301 | cellular response to hydrogen peroxide                                       | GO_BiologicalProcess-EBI-UniProt-GOA-ACAP-ARAP_08.05.2020_00h00 | 0,02034726  | 0,034772012 | 0,000731504 | 0,00146301 | [5, 6, 7]                       | Group167 | 6,67  | 7,00  |
| GO:1903556 | negative regulation of tumor necrosis factor superfamily cytokine production | GO_BiologicalProcess-EBI-UniProt-GOA-ACAP-ARAP_08.05.2020_00h00 | 0,029100992 | 0,045283981 | 0,000731504 | 0,00146301 | [4, 5, 6, 7, 8]                 | Group167 | 7,58  | 5,00  |
| GO:0071222 | cellular response to lipopolysaccharide                                      | GO_BiologicalProcess-EBI-UniProt-GOA-ACAP-ARAP_08.05.2020_00h00 | 0,006491162 | 0,014651042 | 0,000731504 | 0,00146301 | [5, 6, 8]                       | Group167 | 5,78  | 13,00 |
| GO:0097028 | dendritic cell differentiation                                               | GO_BiologicalProcess-EBI-UniProt-GOA-ACAP-ARAP_08.05.2020_00h00 | 0,029624119 | 0,045948595 | 0,000731504 | 0,00146301 | [5, 6, 7, 8, 9]                 | Group167 | 8,89  | 4,00  |
| GO:2000352 | negative regulation of endothelial cell apoptotic process                    | GO_BiologicalProcess-EBI-UniProt-GOA-ACAP-ARAP_08.05.2020_00h00 | 0,008316356 | 0,017884837 | 0,000731504 | 0,00146301 | [7, 8, 9]                       | Group167 | 12,90 | 4,00  |
| GO:0043027 | cysteine-type endopeptidase inhibitor activity involved in apoptotic process | GO_BiologicalProcess-EBI-UniProt-GOA-ACAP-ARAP_08.05.2020_00h00 | 0,032678593 | 0,04924947  | 0,000731504 | 0,00146301 | [5, 6, 7, 8, 9, 10, 11, 12, 13] | Group167 | 11,11 | 3,00  |
| GO:0051098 | regulation of binding                                                        | GO_BiologicalProcess-EBI-UniProt-GOA-ACAP-ARAP_08.05.2020_00h00 | 0,000744828 | 0,002828573 | 0,000744828 | 0,0014731  | [3]                             | Group107 | 5,58  | 22,00 |
| GO:0043393 | regulation of protein binding                                                | GO_BiologicalProcess-EBI-UniProt-GOA-ACAP-ARAP_08.05.2020_00h00 | 0,000816717 | 0,003017755 | 0,000744828 | 0,0014731  | [4]                             | Group107 | 6,73  | 15,00 |
| GO:0051099 | positive regulation of binding                                               | GO_BiologicalProcess-EBI-UniProt-GOA-ACAP-ARAP_08.05.2020_00h00 | 0,000577287 | 0,002340946 | 0,000744828 | 0,0014731  | [4]                             | Group107 | 7,25  | 14,00 |
| GO:0051101 | regulation of DNA binding                                                    | GO_BiologicalProcess-EBI-UniProt-GOA-ACAP-ARAP_08.05.2020_00h00 | 0,02470557  | 0,040278073 | 0,000744828 | 0,0014731  | [4]                             | Group107 | 5,97  | 8,00  |
| GO:0032092 | positive regulation of protein binding                                       | GO_BiologicalProcess-EBI-UniProt-GOA-ACAP-ARAP_08.05.2020_00h00 | 0,000677081 | 0,00264476  | 0,000744828 | 0,0014731  | [5]                             | Group107 | 9,78  | 9,00  |
| GO:0051219 | phosphoprotein binding                                                       | GO_MolecularFunction-EBI-UniProt-GOA-ACAP-ARAP_08.05.2020_00h00 | 0,011026364 | 0,022075796 | 0,000753237 | 0,00147337 | [3]                             | Group118 | 7,53  | 7,00  |
| GO:0090559 | regulation of membrane permeability                                          | GO_BiologicalProcess-EBI-UniProt-GOA-ACAP-ARAP_08.05.2020_00h00 | 0,030644687 | 0,046923146 | 0,000753237 | 0,00147337 | [3]                             | Group118 | 6,67  | 6,00  |
| GO:0006839 | mitochondrial transport                                                      | GO_BiologicalProcess-EBI-UniProt-GOA-ACAP-ARAP_08.05.2020_00h00 | 0,033457808 | 0,049951829 | 0,000753237 | 0,00147337 | [4]                             | Group118 | 4,64  | 13,00 |
| GO:1903829 | positive regulation of cellular protein localization                         | GO_BiologicalProcess-EBI-UniProt-GOA-ACAP-ARAP_08.05.2020_00h00 | 0,025775954 | 0,04145813  | 0,000753237 | 0,00147337 | [3, 4, 5, 6]                    | Group118 | 4,49  | 16,00 |
| GO:0001836 | release of cytochrome c from mitochondria                                    | GO_BiologicalProcess-EBI-UniProt-GOA-ACAP-ARAP_08.05.2020_00h00 | 0,001802429 | 0,005618646 | 0,000753237 | 0,00147337 | [4, 5, 6, 7]                    | Group118 | 10,45 | 7,00  |
| GO:1903747 | regulation of establishment of protein localization to mitochondrion         | GO_BiologicalProcess-EBI-UniProt-GOA-ACAP-ARAP_08.05.2020_00h00 | 0,016363574 | 0,029491413 | 0,000753237 | 0,00147337 | [5, 6, 7, 8]                    | Group118 | 7,69  | 6,00  |
| GO:0042149 | cellular response to glucose starvation                                      | GO_BiologicalProcess-EBI-UniProt-GOA-ACAP-ARAP_08.05.2020_00h00 | 0,025549145 | 0,041231927 | 0,00079609  | 0,00150749 | [5, 6, 7]                       | Group116 | 9,30  | 4,00  |

|            |                                                                                            |                                                                 |             |             |             |            |                              |          |       |       |
|------------|--------------------------------------------------------------------------------------------|-----------------------------------------------------------------|-------------|-------------|-------------|------------|------------------------------|----------|-------|-------|
| GO:0071287 | cellular response to manganese ion                                                         | GO_BiologicalProcess-EBI-UniProt-GOA-ACAP-ARAP_08.05.2020_00h00 | 0,004184007 | 0,010319832 | 0,00079609  | 0,00150749 | [6]                          | Group116 | 23,08 | 3,00  |
| GO:0071320 | cellular response to cAMP                                                                  | GO_BiologicalProcess-EBI-UniProt-GOA-ACAP-ARAP_08.05.2020_00h00 | 0,003981134 | 0,009921734 | 0,00079609  | 0,00150749 | [5, 6, 7]                    | Group116 | 10,34 | 6,00  |
| GO:0060487 | lung epithelial cell differentiation                                                       | GO_BiologicalProcess-EBI-UniProt-GOA-ACAP-ARAP_08.05.2020_00h00 | 0,018932438 | 0,03306267  | 0,00079609  | 0,00150749 | [5, 6, 7, 8, 9]              | Group116 | 13,64 | 3,00  |
| GO:0043618 | regulation of transcription from RNA polymerase II promoter in response to stress          | GO_BiologicalProcess-EBI-UniProt-GOA-ACAP-ARAP_08.05.2020_00h00 | 0,016302135 | 0,029436117 | 0,00079609  | 0,00150749 | [5, 7, 8, 9, 10, 11, 12]     | Group116 | 6,45  | 8,00  |
| GO:0036003 | positive regulation of transcription from RNA polymerase II promoter in response to stress | GO_BiologicalProcess-EBI-UniProt-GOA-ACAP-ARAP_08.05.2020_00h00 | 0,008316356 | 0,017884837 | 0,00079609  | 0,00150749 | [6, 7, 8, 9, 10, 11, 12, 13] | Group116 | 12,90 | 4,00  |
| GO:2001020 | regulation of response to DNA damage stimulus                                              | GO_BiologicalProcess-EBI-UniProt-GOA-ACAP-ARAP_08.05.2020_00h00 | 0,004286675 | 0,010465174 | 0,000795422 | 0,00152242 | [4, 5, 6]                    | Group138 | 5,86  | 14,00 |
| GO:0051052 | regulation of DNA metabolic process                                                        | GO_BiologicalProcess-EBI-UniProt-GOA-ACAP-ARAP_08.05.2020_00h00 | 0,002958667 | 0,008043876 | 0,000795422 | 0,00152242 | [4, 5, 6, 7]                 | Group138 | 5,19  | 20,00 |
| GO:0051053 | negative regulation of DNA metabolic process                                               | GO_BiologicalProcess-EBI-UniProt-GOA-ACAP-ARAP_08.05.2020_00h00 | 0,02470557  | 0,040278073 | 0,000795422 | 0,00152242 | [4, 5, 6, 7, 8]              | Group138 | 5,97  | 8,00  |
| GO:0051054 | positive regulation of DNA metabolic process                                               | GO_BiologicalProcess-EBI-UniProt-GOA-ACAP-ARAP_08.05.2020_00h00 | 0,009825587 | 0,020265274 | 0,000795422 | 0,00152242 | [4, 5, 6, 7, 8]              | Group138 | 5,69  | 12,00 |
| GO:0071897 | DNA biosynthetic process                                                                   | GO_BiologicalProcess-EBI-UniProt-GOA-ACAP-ARAP_08.05.2020_00h00 | 0,006491162 | 0,014651042 | 0,000795422 | 0,00152242 | [5, 6, 7]                    | Group138 | 5,78  | 13,00 |
| GO:2000278 | regulation of DNA biosynthetic process                                                     | GO_BiologicalProcess-EBI-UniProt-GOA-ACAP-ARAP_08.05.2020_00h00 | 0,005610256 | 0,013063299 | 0,000795422 | 0,00152242 | [5, 6, 7, 8]                 | Group138 | 7,20  | 9,00  |
| GO:2000573 | positive regulation of DNA biosynthetic process                                            | GO_BiologicalProcess-EBI-UniProt-GOA-ACAP-ARAP_08.05.2020_00h00 | 0,004285873 | 0,010489975 | 0,000795422 | 0,00152242 | [5, 6, 7, 8, 9]              | Group138 | 8,97  | 7,00  |
| GO:1904645 | response to amyloid-beta                                                                   | GO_BiologicalProcess-EBI-UniProt-GOA-ACAP-ARAP_08.05.2020_00h00 | 0,001862162 | 0,005748675 | 0,000791828 | 0,00153201 | [5, 6]                       | Group068 | 12,00 | 6,00  |
| GO:1904646 | cellular response to amyloid-beta                                                          | GO_BiologicalProcess-EBI-UniProt-GOA-ACAP-ARAP_08.05.2020_00h00 | 0,018466409 | 0,032485943 | 0,000791828 | 0,00153201 | [6, 7]                       | Group068 | 10,26 | 4,00  |
| GO:0098815 | modulation of excitatory postsynaptic potential                                            | GO_BiologicalProcess-EBI-UniProt-GOA-ACAP-ARAP_08.05.2020_00h00 | 0,008146646 | 0,017638776 | 0,000791828 | 0,00153201 | [4, 5, 6, 7, 8, 9, 10]       | Group068 | 10,42 | 5,00  |
| GO:0034976 | response to endoplasmic reticulum stress                                                   | GO_BiologicalProcess-EBI-UniProt-GOA-ACAP-ARAP_08.05.2020_00h00 | 0,014044944 | 0,026354926 | 0,000886187 | 0,00166043 | [4]                          | Group142 | 4,95  | 15,00 |
| GO:0035967 | cellular response to topologically incorrect protein                                       | GO_BiologicalProcess-EBI-UniProt-GOA-ACAP-ARAP_08.05.2020_00h00 | 0,000578597 | 0,00233636  | 0,000886187 | 0,00166043 | [4, 5]                       | Group142 | 7,60  | 13,00 |
| GO:0030968 | endoplasmic reticulum unfolded protein response                                            | GO_BiologicalProcess-EBI-UniProt-GOA-ACAP-ARAP_08.05.2020_00h00 | 0,021922005 | 0,03687058  | 0,000886187 | 0,00166043 | [3, 4, 5, 6, 7]              | Group142 | 6,11  | 8,00  |
| GO:1905897 | regulation of response to endoplasmic reticulum stress                                     | GO_BiologicalProcess-EBI-UniProt-GOA-ACAP-ARAP_08.05.2020_00h00 | 0,009845688 | 0,020263061 | 0,000886187 | 0,00166043 | [4, 5, 6]                    | Group142 | 7,69  | 7,00  |
| GO:0034620 | cellular response to unfolded protein                                                      | GO_BiologicalProcess-EBI-UniProt-GOA-ACAP-ARAP_08.05.2020_00h00 | 0,006754607 | 0,015103176 | 0,000886187 | 0,00166043 | [5, 6]                       | Group142 | 6,58  | 10,00 |
| GO:0042149 | cellular response to glucose starvation                                                    | GO_BiologicalProcess-EBI-UniProt-GOA-ACAP-ARAP_08.05.2020_00h00 | 0,025549145 | 0,041231927 | 0,000886187 | 0,00166043 | [5, 6, 7]                    | Group142 | 9,30  | 4,00  |
| GO:0070059 | intrinsic apoptotic signaling pathway in response to endoplasmic reticulum stress          | GO_BiologicalProcess-EBI-UniProt-GOA-ACAP-ARAP_08.05.2020_00h00 | 0,032554209 | 0,04921703  | 0,000886187 | 0,00166043 | [5, 6, 7]                    | Group142 | 7,35  | 5,00  |

|            |                                                                                        |                                                                 |             |             |             |            |                        |          |       |       |
|------------|----------------------------------------------------------------------------------------|-----------------------------------------------------------------|-------------|-------------|-------------|------------|------------------------|----------|-------|-------|
| GO:2001242 | regulation of intrinsic apoptotic signaling pathway                                    | GO_BiologicalProcess-EBI-UniProt-GOA-ACAP-ARAP_08.05.2020_00h00 | 0,01703891  | 0,03036543  | 0,000886187 | 0,00166043 | [5, 6, 7, 8]           | Group142 | 5,71  | 10,00 |
| GO:0001935 | endothelial cell proliferation                                                         | GO_BiologicalProcess-EBI-UniProt-GOA-ACAP-ARAP_08.05.2020_00h00 | 0,003633375 | 0,00934715  | 0,000912621 | 0,00169215 | [4]                    | Group129 | 6,79  | 11,00 |
| GO:0090287 | regulation of cellular response to growth factor stimulus                              | GO_BiologicalProcess-EBI-UniProt-GOA-ACAP-ARAP_08.05.2020_00h00 | 0,00110216  | 0,003767027 | 0,000912621 | 0,00169215 | [3, 4, 6]              | Group129 | 5,94  | 18,00 |
| GO:0090288 | negative regulation of cellular response to growth factor stimulus                     | GO_BiologicalProcess-EBI-UniProt-GOA-ACAP-ARAP_08.05.2020_00h00 | 0,012154936 | 0,023885572 | 0,000912621 | 0,00169215 | [3, 4, 5, 6, 7]        | Group129 | 6,02  | 10,00 |
| GO:0001936 | regulation of endothelial cell proliferation                                           | GO_BiologicalProcess-EBI-UniProt-GOA-ACAP-ARAP_08.05.2020_00h00 | 0,014143549 | 0,026282284 | 0,000912621 | 0,00169215 | [5, 6]                 | Group129 | 6,21  | 9,00  |
| GO:0090092 | regulation of transmembrane receptor protein serine/threonine kinase signaling pathway | GO_BiologicalProcess-EBI-UniProt-GOA-ACAP-ARAP_08.05.2020_00h00 | 0,018717377 | 0,032806829 | 0,000912621 | 0,00169215 | [4, 5, 6, 7, 8]        | Group129 | 5,04  | 13,00 |
| GO:0040037 | negative regulation of fibroblast growth factor receptor signaling pathway             | GO_BiologicalProcess-EBI-UniProt-GOA-ACAP-ARAP_08.05.2020_00h00 | 0,012620698 | 0,024499003 | 0,000912621 | 0,00169215 | [4, 5, 6, 7, 8, 9, 10] | Group129 | 15,79 | 3,00  |
| GO:0003170 | heart valve development                                                                | GO_BiologicalProcess-EBI-UniProt-GOA-ACAP-ARAP_08.05.2020_00h00 | 0,029100992 | 0,045283981 | 0,001004703 | 0,00184368 | [3, 5, 6, 7]           | Group080 | 7,58  | 5,00  |
| GO:0002011 | morphogenesis of an epithelial sheet                                                   | GO_BiologicalProcess-EBI-UniProt-GOA-ACAP-ARAP_08.05.2020_00h00 | 0,000160526 | 0,000882894 | 0,001004703 | 0,00184368 | [5, 6]                 | Group080 | 13,33 | 8,00  |
| GO:0044319 | wound healing, spreading of cells                                                      | GO_BiologicalProcess-EBI-UniProt-GOA-ACAP-ARAP_08.05.2020_00h00 | 0,001784321 | 0,005598672 | 0,001004703 | 0,00184368 | [4, 5, 6, 8, 9]        | Group080 | 14,71 | 5,00  |
| GO:0035313 | wound healing, spreading of epidermal cells                                            | GO_BiologicalProcess-EBI-UniProt-GOA-ACAP-ARAP_08.05.2020_00h00 | 0,009205425 | 0,019319279 | 0,001004703 | 0,00184368 | [5, 6, 7, 9, 10]       | Group080 | 17,65 | 3,00  |
| GO:0005975 | carbohydrate metabolic process                                                         | GO_BiologicalProcess-EBI-UniProt-GOA-ACAP-ARAP_08.05.2020_00h00 | 0,014086824 | 0,02627893  | 0,001067563 | 0,00193904 | [3]                    | Group181 | 4,08  | 28,00 |
| GO:0072593 | reactive oxygen species metabolic process                                              | GO_BiologicalProcess-EBI-UniProt-GOA-ACAP-ARAP_08.05.2020_00h00 | 0,031204019 | 0,047627185 | 0,001067563 | 0,00193904 | [3]                    | Group181 | 4,58  | 14,00 |
| GO:0044262 | cellular carbohydrate metabolic process                                                | GO_BiologicalProcess-EBI-UniProt-GOA-ACAP-ARAP_08.05.2020_00h00 | 0,000464017 | 0,001973621 | 0,001067563 | 0,00193904 | [3, 4]                 | Group181 | 6,06  | 20,00 |
| GO:0062012 | regulation of small molecule metabolic process                                         | GO_BiologicalProcess-EBI-UniProt-GOA-ACAP-ARAP_08.05.2020_00h00 | 0,027698154 | 0,043958761 | 0,001067563 | 0,00193904 | [3, 4]                 | Group181 | 4,18  | 20,00 |
| GO:0005976 | polysaccharide metabolic process                                                       | GO_BiologicalProcess-EBI-UniProt-GOA-ACAP-ARAP_08.05.2020_00h00 | 0,00532592  | 0,012492415 | 0,001067563 | 0,00193904 | [4]                    | Group181 | 7,26  | 9,00  |
| GO:0006022 | aminoglycan metabolic process                                                          | GO_BiologicalProcess-EBI-UniProt-GOA-ACAP-ARAP_08.05.2020_00h00 | 0,01962244  | 0,034081079 | 0,001067563 | 0,00193904 | [4]                    | Group181 | 5,59  | 10,00 |
| GO:0016051 | carbohydrate biosynthetic process                                                      | GO_BiologicalProcess-EBI-UniProt-GOA-ACAP-ARAP_08.05.2020_00h00 | 0,029786352 | 0,046050951 | 0,001067563 | 0,00193904 | [4]                    | Group181 | 4,86  | 12,00 |
| GO:0062013 | positive regulation of small molecule metabolic process                                | GO_BiologicalProcess-EBI-UniProt-GOA-ACAP-ARAP_08.05.2020_00h00 | 0,008775524 | 0,018580036 | 0,001067563 | 0,00193904 | [3, 4, 5]              | Group181 | 6,33  | 10,00 |
| GO:0006109 | regulation of carbohydrate metabolic process                                           | GO_BiologicalProcess-EBI-UniProt-GOA-ACAP-ARAP_08.05.2020_00h00 | 0,006973192 | 0,015555582 | 0,001067563 | 0,00193904 | [4, 5]                 | Group181 | 5,73  | 13,00 |
| GO:0045913 | positive regulation of carbohydrate metabolic process                                  | GO_BiologicalProcess-EBI-UniProt-GOA-ACAP-ARAP_08.05.2020_00h00 | 0,002461149 | 0,007094337 | 0,001067563 | 0,00193904 | [3, 4, 5, 6]           | Group181 | 8,89  | 8,00  |
| GO:0000271 | polysaccharide biosynthetic process                                                    | GO_BiologicalProcess-EBI-UniProt-GOA-ACAP-ARAP_08.05.2020_00h00 | 0,007299894 | 0,016133945 | 0,001067563 | 0,00193904 | [5]                    | Group181 | 8,14  | 7,00  |
| GO:0043255 | regulation of carbohydrate biosynthetic process                                        | GO_BiologicalProcess-EBI-UniProt-GOA-ACAP-ARAP_08.05.2020_00h00 | 0,024403341 | 0,039853238 | 0,001067563 | 0,00193904 | [4, 5, 6]              | Group181 | 6,42  | 7,00  |

|            |                                                     |                                                                 |             |             |             |            |                    |          |       |       |
|------------|-----------------------------------------------------|-----------------------------------------------------------------|-------------|-------------|-------------|------------|--------------------|----------|-------|-------|
| GO:0014909 | smooth muscle cell migration                        | GO_BiologicalProcess-EBI-UniProt-GOA-ACAP-ARAP_08.05.2020_00h00 | 0,000144714 | 0,000819473 | 0,001067563 | 0,00193904 | [5, 6]             | Group181 | 12,00 | 9,00  |
| GO:0044070 | regulation of anion transport                       | GO_BiologicalProcess-EBI-UniProt-GOA-ACAP-ARAP_08.05.2020_00h00 | 0,032775592 | 0,049240567 | 0,001067563 | 0,00193904 | [5, 6]             | Group181 | 6,03  | 7,00  |
| GO:0006140 | regulation of nucleotide metabolic process          | GO_BiologicalProcess-EBI-UniProt-GOA-ACAP-ARAP_08.05.2020_00h00 | 0,023751667 | 0,039055575 | 0,001067563 | 0,00193904 | [4, 5, 6, 7, 8]    | Group181 | 6,02  | 8,00  |
| GO:0014910 | regulation of smooth muscle cell migration          | GO_BiologicalProcess-EBI-UniProt-GOA-ACAP-ARAP_08.05.2020_00h00 | 0,000348865 | 0,001605114 | 0,001067563 | 0,00193904 | [5, 6, 7]          | Group181 | 11,94 | 8,00  |
| GO:0032885 | regulation of polysaccharide biosynthetic process   | GO_BiologicalProcess-EBI-UniProt-GOA-ACAP-ARAP_08.05.2020_00h00 | 0,023646265 | 0,038949184 | 0,001067563 | 0,00193904 | [5, 6, 7]          | Group181 | 9,52  | 4,00  |
| GO:0051546 | keratinocyte migration                              | GO_BiologicalProcess-EBI-UniProt-GOA-ACAP-ARAP_08.05.2020_00h00 | 0,012620698 | 0,024499003 | 0,001067563 | 0,00193904 | [5, 6, 7]          | Group181 | 15,79 | 3,00  |
| GO:0014911 | positive regulation of smooth muscle cell migration | GO_BiologicalProcess-EBI-UniProt-GOA-ACAP-ARAP_08.05.2020_00h00 | 0,000943803 | 0,003345259 | 0,001067563 | 0,00193904 | [5, 6, 7, 8]       | Group181 | 13,64 | 6,00  |
| GO:0030212 | hyaluronan metabolic process                        | GO_BiologicalProcess-EBI-UniProt-GOA-ACAP-ARAP_08.05.2020_00h00 | 0,005625159 | 0,013066206 | 0,001067563 | 0,00193904 | [6, 7]             | Group181 | 11,36 | 5,00  |
| GO:0051549 | positive regulation of keratinocyte migration       | GO_BiologicalProcess-EBI-UniProt-GOA-ACAP-ARAP_08.05.2020_00h00 | 0,003281716 | 0,008604389 | 0,001067563 | 0,00193904 | [4, 5, 6, 7, 8, 9] | Group181 | 25,00 | 3,00  |
| GO:0009179 | purine ribonucleoside diphosphate metabolic process | GO_BiologicalProcess-EBI-UniProt-GOA-ACAP-ARAP_08.05.2020_00h00 | 0,007714132 | 0,01689342  | 0,001067563 | 0,00193904 | [7, 8, 9]          | Group181 | 6,45  | 10,00 |
| GO:0019751 | polyol metabolic process                            | GO_BiologicalProcess-EBI-UniProt-GOA-ACAP-ARAP_08.05.2020_00h00 | 0,006168251 | 0,014088344 | 0,001366218 | 0,00245643 | [4, 5]             | Group065 | 6,67  | 10,00 |
| GO:0071545 | inositol phosphate catabolic process                | GO_BiologicalProcess-EBI-UniProt-GOA-ACAP-ARAP_08.05.2020_00h00 | 0,001606011 | 0,005140308 | 0,001366218 | 0,00245643 | [5, 6, 7]          | Group065 | 20,00 | 4,00  |
| GO:0046856 | phosphatidylinositol dephosphorylation              | GO_BiologicalProcess-EBI-UniProt-GOA-ACAP-ARAP_08.05.2020_00h00 | 0,007393209 | 0,016265061 | 0,001366218 | 0,00245643 | [6, 7, 8]          | Group065 | 13,33 | 4,00  |
| GO:0098751 | bone cell development                               | GO_BiologicalProcess-EBI-UniProt-GOA-ACAP-ARAP_08.05.2020_00h00 | 0,014057252 | 0,026326399 | 0,001366218 | 0,00245643 | [4, 5, 6, 7]       | Group066 | 11,11 | 4,00  |
| GO:0061515 | myeloid cell development                            | GO_BiologicalProcess-EBI-UniProt-GOA-ACAP-ARAP_08.05.2020_00h00 | 0,000976749 | 0,003436575 | 0,001366218 | 0,00245643 | [4, 5, 6, 7, 8, 9] | Group066 | 10,26 | 8,00  |
| GO:0030316 | osteoclast differentiation                          | GO_BiologicalProcess-EBI-UniProt-GOA-ACAP-ARAP_08.05.2020_00h00 | 0,02034726  | 0,034772012 | 0,001366218 | 0,00245643 | [6, 7, 8, 9, 10]   | Group066 | 6,67  | 7,00  |
| GO:0006914 | autophagy                                           | GO_BiologicalProcess-EBI-UniProt-GOA-ACAP-ARAP_08.05.2020_00h00 | 0,030111073 | 0,046254087 | 0,001519263 | 0,00270429 | [3, 4]             | Group090 | 4,04  | 22,00 |
| GO:0009894 | regulation of catabolic process                     | GO_BiologicalProcess-EBI-UniProt-GOA-ACAP-ARAP_08.05.2020_00h00 | 0,002341402 | 0,006810703 | 0,001519263 | 0,00270429 | [3, 4]             | Group090 | 4,08  | 44,00 |
| GO:0016236 | macroautophagy                                      | GO_BiologicalProcess-EBI-UniProt-GOA-ACAP-ARAP_08.05.2020_00h00 | 0,033472851 | 0,049896449 | 0,001519263 | 0,00270429 | [4, 5]             | Group090 | 4,53  | 14,00 |
| GO:0031329 | regulation of cellular catabolic process            | GO_BiologicalProcess-EBI-UniProt-GOA-ACAP-ARAP_08.05.2020_00h00 | 0,00275227  | 0,007656751 | 0,001519263 | 0,00270429 | [4, 5]             | Group090 | 4,21  | 38,00 |
| GO:0006458 | 'de novo' protein folding                           | GO_BiologicalProcess-EBI-UniProt-GOA-ACAP-ARAP_08.05.2020_00h00 | 0,004597845 | 0,011111458 | 0,001563882 | 0,00275615 | [3]                | Group134 | 11,90 | 5,00  |
| GO:0061077 | chaperone-mediated protein folding                  | GO_BiologicalProcess-EBI-UniProt-GOA-ACAP-ARAP_08.05.2020_00h00 | 0,027465085 | 0,04366127  | 0,001563882 | 0,00275615 | [3]                | Group134 | 7,69  | 5,00  |
| GO:0003756 | protein disulfide isomerase activity                | GO_MolecularFunction-EBI-UniProt-GOA-ACAP-ARAP_08.05.2020_00h00 | 0,012620698 | 0,024499003 | 0,001563882 | 0,00275615 | [3, 5]             | Group134 | 15,79 | 3,00  |

|            |                                                                                            |                                                                 |             |             |             |            |                              |          |       |       |
|------------|--------------------------------------------------------------------------------------------|-----------------------------------------------------------------|-------------|-------------|-------------|------------|------------------------------|----------|-------|-------|
| GO:0022417 | protein maturation by protein folding                                                      | GO_BiologicalProcess-EBI-UniProt-GOA-ACAP-ARAP_08.05.2020_00h00 | 0,00186122  | 0,005764362 | 0,001563882 | 0,00275615 | [3, 5, 6]                    | Group134 | 30,00 | 3,00  |
| GO:0015036 | disulfide oxidoreductase activity                                                          | GO_BiologicalProcess-EBI-UniProt-GOA-ACAP-ARAP_08.05.2020_00h00 | 0,000560477 | 0,002292205 | 0,001563882 | 0,00275615 | [5]                          | Group134 | 15,00 | 6,00  |
| GO:0015035 | protein disulfide oxidoreductase activity                                                  | GO_BiologicalProcess-EBI-UniProt-GOA-ACAP-ARAP_08.05.2020_00h00 | 0,002326542 | 0,006788111 | 0,001563882 | 0,00275615 | [6]                          | Group134 | 18,18 | 4,00  |
| GO:0015037 | peptide disulfide oxidoreductase activity                                                  | GO_BiologicalProcess-EBI-UniProt-GOA-ACAP-ARAP_08.05.2020_00h00 | 0,005222608 | 0,012340829 | 0,001563882 | 0,00275615 | [6]                          | Group134 | 21,43 | 3,00  |
| GO:0007219 | Notch signaling pathway                                                                    | GO_BiologicalProcess-EBI-UniProt-GOA-ACAP-ARAP_08.05.2020_00h00 | 0,002203569 | 0,006549115 | 0,001884013 | 0,00325587 | [4, 5, 6]                    | Group135 | 6,57  | 13,00 |
| GO:0008366 | axon ensheathment                                                                          | GO_BiologicalProcess-EBI-UniProt-GOA-ACAP-ARAP_08.05.2020_00h00 | 0,020160235 | 0,034637965 | 0,001884013 | 0,00325587 | [3, 6, 7]                    | Group135 | 5,84  | 9,00  |
| GO:0042063 | gliogenesis                                                                                | GO_BiologicalProcess-EBI-UniProt-GOA-ACAP-ARAP_08.05.2020_00h00 | 0,010466523 | 0,021221317 | 0,001884013 | 0,00325587 | [5, 6, 7]                    | Group135 | 5,00  | 16,00 |
| GO:0010001 | glial cell differentiation                                                                 | GO_BiologicalProcess-EBI-UniProt-GOA-ACAP-ARAP_08.05.2020_00h00 | 0,023210056 | 0,038495708 | 0,001884013 | 0,00325587 | [4, 6, 7, 8]                 | Group135 | 5,04  | 12,00 |
| GO:0021782 | glial cell development                                                                     | GO_BiologicalProcess-EBI-UniProt-GOA-ACAP-ARAP_08.05.2020_00h00 | 0,015593992 | 0,028264109 | 0,001884013 | 0,00325587 | [4, 5, 7, 8, 9]              | Group135 | 6,50  | 8,00  |
| GO:0048708 | astrocyte differentiation                                                                  | GO_BiologicalProcess-EBI-UniProt-GOA-ACAP-ARAP_08.05.2020_00h00 | 0,027841724 | 0,043967873 | 0,001884013 | 0,00325587 | [5, 6, 7, 8, 9]              | Group135 | 6,82  | 6,00  |
| GO:0014002 | astrocyte development                                                                      | GO_BiologicalProcess-EBI-UniProt-GOA-ACAP-ARAP_08.05.2020_00h00 | 0,031797417 | 0,04830179  | 0,001884013 | 0,00325587 | [5, 6, 7, 8, 9, 10]          | Group135 | 8,70  | 4,00  |
| GO:0031668 | cellular response to extracellular stimulus                                                | GO_BiologicalProcess-EBI-UniProt-GOA-ACAP-ARAP_08.05.2020_00h00 | 0,019883081 | 0,034471214 | 0,001872875 | 0,00326835 | [3, 4]                       | Group121 | 4,86  | 14,00 |
| GO:0009267 | cellular response to starvation                                                            | GO_BiologicalProcess-EBI-UniProt-GOA-ACAP-ARAP_08.05.2020_00h00 | 0,026896063 | 0,042899221 | 0,001872875 | 0,00326835 | [4, 5, 6]                    | Group121 | 5,56  | 9,00  |
| GO:0042149 | cellular response to glucose starvation                                                    | GO_BiologicalProcess-EBI-UniProt-GOA-ACAP-ARAP_08.05.2020_00h00 | 0,025549145 | 0,041231927 | 0,001872875 | 0,00326835 | [5, 6, 7]                    | Group121 | 9,30  | 4,00  |
| GO:0070059 | intrinsic apoptotic signaling pathway in response to endoplasmic reticulum stress          | GO_BiologicalProcess-EBI-UniProt-GOA-ACAP-ARAP_08.05.2020_00h00 | 0,032554209 | 0,04921703  | 0,001872875 | 0,00326835 | [5, 6, 7]                    | Group121 | 7,35  | 5,00  |
| GO:0071287 | cellular response to manganese ion                                                         | GO_BiologicalProcess-EBI-UniProt-GOA-ACAP-ARAP_08.05.2020_00h00 | 0,004184007 | 0,010319832 | 0,001872875 | 0,00326835 | [6]                          | Group121 | 23,08 | 3,00  |
| GO:0036003 | positive regulation of transcription from RNA polymerase II promoter in response to stress | GO_BiologicalProcess-EBI-UniProt-GOA-ACAP-ARAP_08.05.2020_00h00 | 0,008316356 | 0,017884837 | 0,001872875 | 0,00326835 | [6, 7, 8, 9, 10, 11, 12, 13] | Group121 | 12,90 | 4,00  |
| GO:0019900 | kinase binding                                                                             | GO_MolecularFunction-EBI-UniProt-GOA-ACAP-ARAP_08.05.2020_00h00 | 0,00272406  | 0,007600365 | 0,001970044 | 0,00337181 | [4]                          | Group075 | 4,35  | 34,00 |
| GO:0019901 | protein kinase binding                                                                     | GO_MolecularFunction-EBI-UniProt-GOA-ACAP-ARAP_08.05.2020_00h00 | 0,00820952  | 0,017734786 | 0,001970044 | 0,00337181 | [5]                          | Group075 | 4,22  | 29,00 |
| GO:1990782 | protein tyrosine kinase binding                                                            | GO_MolecularFunction-EBI-UniProt-GOA-ACAP-ARAP_08.05.2020_00h00 | 0,004437468 | 0,010778317 | 0,001970044 | 0,00337181 | [6]                          | Group075 | 8,08  | 8,00  |
| GO:0042326 | negative regulation of phosphorylation                                                     | GO_BiologicalProcess-EBI-UniProt-GOA-ACAP-ARAP_08.05.2020_00h00 | 0,001627748 | 0,005192518 | 0,001970044 | 0,00337181 | [6, 7, 8]                    | Group075 | 5,07  | 24,00 |
| GO:0051651 | maintenance of location in cell                                                            | GO_BiologicalProcess-EBI-UniProt-GOA-ACAP-ARAP_08.05.2020_00h00 | 0,00192218  | 0,005914877 | 0,002095667 | 0,00351914 | [2, 3, 4]                    | Group147 | 6,17  | 15,00 |



|            |                                                          |                                                                 |             |             |             |            |                                     |          |       |       |
|------------|----------------------------------------------------------|-----------------------------------------------------------------|-------------|-------------|-------------|------------|-------------------------------------|----------|-------|-------|
| GO:0019751 | polyol metabolic process                                 | GO_BiologicalProcess-EBI-UniProt-GOA-ACAP-ARAP_08.05.2020_00h00 | 0,006168251 | 0,014088344 | 0,002095667 | 0,00351914 | [4, 5]                              | Group147 | 6,67  | 10,00 |
| GO:0046165 | alcohol biosynthetic process                             | GO_BiologicalProcess-EBI-UniProt-GOA-ACAP-ARAP_08.05.2020_00h00 | 0,029087059 | 0,045336019 | 0,002095667 | 0,00351914 | [4, 5]                              | Group147 | 5,24  | 10,00 |
| GO:0046173 | polyol biosynthetic process                              | GO_BiologicalProcess-EBI-UniProt-GOA-ACAP-ARAP_08.05.2020_00h00 | 0,00929126  | 0,019456752 | 0,002095667 | 0,00351914 | [5, 6]                              | Group147 | 7,78  | 7,00  |
| GO:0051208 | sequestering of calcium ion                              | GO_BiologicalProcess-EBI-UniProt-GOA-ACAP-ARAP_08.05.2020_00h00 | 0,000410002 | 0,001824987 | 0,002095667 | 0,00351914 | [3, 4, 5, 8, 10]                    | Group147 | 8,33  | 12,00 |
| GO:0071545 | inositol phosphate catabolic process                     | GO_BiologicalProcess-EBI-UniProt-GOA-ACAP-ARAP_08.05.2020_00h00 | 0,001606011 | 0,005140308 | 0,002095667 | 0,00351914 | [5, 6, 7]                           | Group147 | 20,00 | 4,00  |
| GO:0032959 | inositol triphosphate biosynthetic process               | GO_BiologicalProcess-EBI-UniProt-GOA-ACAP-ARAP_08.05.2020_00h00 | 0,026696119 | 0,042651396 | 0,002095667 | 0,00351914 | [6, 7, 8]                           | Group147 | 12,00 | 3,00  |
| GO:0060402 | calcium ion transport into cytosol                       | GO_BiologicalProcess-EBI-UniProt-GOA-ACAP-ARAP_08.05.2020_00h00 | 0,000377397 | 0,001703626 | 0,002095667 | 0,00351914 | [4, 10, 12]                         | Group147 | 7,57  | 14,00 |
| GO:0051209 | release of sequestered calcium ion into cytosol          | GO_BiologicalProcess-EBI-UniProt-GOA-ACAP-ARAP_08.05.2020_00h00 | 0,0002773   | 0,001333548 | 0,002095667 | 0,00351914 | [4, 5, 6, 7, 8, 10, 11, 12, 13, 14] | Group147 | 8,70  | 12,00 |
| GO:0048608 | reproductive structure development                       | GO_BiologicalProcess-EBI-UniProt-GOA-ACAP-ARAP_08.05.2020_00h00 | 0,00208441  | 0,006292682 | 0,00208441  | 0,00353357 | [3, 4, 5, 6]                        | Group076 | 4,98  | 24,00 |
| GO:0001890 | placenta development                                     | GO_BiologicalProcess-EBI-UniProt-GOA-ACAP-ARAP_08.05.2020_00h00 | 0,00194322  | 0,005960454 | 0,00208441  | 0,00353357 | [4, 5, 6, 7]                        | Group076 | 6,98  | 12,00 |
| GO:0001892 | embryonic placenta development                           | GO_BiologicalProcess-EBI-UniProt-GOA-ACAP-ARAP_08.05.2020_00h00 | 0,017631847 | 0,031363714 | 0,00208441  | 0,00353357 | [3, 4, 5, 6, 7, 8]                  | Group076 | 6,86  | 7,00  |
| GO:0060674 | placenta blood vessel development                        | GO_BiologicalProcess-EBI-UniProt-GOA-ACAP-ARAP_08.05.2020_00h00 | 0,003317585 | 0,008674669 | 0,00208441  | 0,00353357 | [3, 4, 5, 6, 7, 8, 9]               | Group076 | 12,82 | 5,00  |
| GO:0098751 | bone cell development                                    | GO_BiologicalProcess-EBI-UniProt-GOA-ACAP-ARAP_08.05.2020_00h00 | 0,014057252 | 0,026326399 | 0,002186506 | 0,00363737 | [4, 5, 6, 7]                        | Group094 | 11,11 | 4,00  |
| GO:0002521 | leukocyte differentiation                                | GO_BiologicalProcess-EBI-UniProt-GOA-ACAP-ARAP_08.05.2020_00h00 | 0,00341803  | 0,008912955 | 0,002186506 | 0,00363737 | [4, 5, 6, 7, 8]                     | Group094 | 4,66  | 26,00 |
| GO:0002573 | myeloid leukocyte differentiation                        | GO_BiologicalProcess-EBI-UniProt-GOA-ACAP-ARAP_08.05.2020_00h00 | 0,002206373 | 0,00653715  | 0,002186506 | 0,00363737 | [5, 6, 7, 8, 9]                     | Group094 | 6,31  | 14,00 |
| GO:0030316 | osteoclast differentiation                               | GO_BiologicalProcess-EBI-UniProt-GOA-ACAP-ARAP_08.05.2020_00h00 | 0,02034726  | 0,034772012 | 0,002186506 | 0,00363737 | [6, 7, 8, 9, 10]                    | Group094 | 6,67  | 7,00  |
| GO:0051250 | negative regulation of lymphocyte activation             | GO_BiologicalProcess-EBI-UniProt-GOA-ACAP-ARAP_08.05.2020_00h00 | 0,02252461  | 0,037685405 | 0,002327856 | 0,00380145 | [4, 5, 6, 7]                        | Group105 | 5,73  | 9,00  |
| GO:0048041 | focal adhesion assembly                                  | GO_BiologicalProcess-EBI-UniProt-GOA-ACAP-ARAP_08.05.2020_00h00 | 0,00302181  | 0,00814612  | 0,002327856 | 0,00380145 | [5, 7]                              | Group105 | 8,60  | 8,00  |
| GO:1903038 | negative regulation of leukocyte cell-cell adhesion      | GO_BiologicalProcess-EBI-UniProt-GOA-ACAP-ARAP_08.05.2020_00h00 | 0,023751667 | 0,039055575 | 0,002327856 | 0,00380145 | [5, 6, 7]                           | Group105 | 6,02  | 8,00  |
| GO:0050860 | negative regulation of T cell receptor signaling pathway | GO_BiologicalProcess-EBI-UniProt-GOA-ACAP-ARAP_08.05.2020_00h00 | 0,00033793  | 0,001562316 | 0,002327856 | 0,00380145 | [4, 5, 6, 7, 8, 9, 10, 11, 12]      | Group105 | 20,83 | 5,00  |
| GO:0004725 | protein tyrosine phosphatase activity                    | GO_BiologicalProcess-EBI-UniProt-GOA-ACAP-ARAP_08.05.2020_00h00 | 0,032775592 | 0,049240567 | 0,002327856 | 0,00380145 | [8, 9]                              | Group105 | 6,03  | 7,00  |
| GO:0003013 | circulatory system process                               | GO_BiologicalProcess-EBI-UniProt-GOA-ACAP-ARAP_08.05.2020_00h00 | 0,002791696 | 0,007699287 | 0,002315196 | 0,00381579 | [3]                                 | Group146 | 4,51  | 30,00 |
| GO:0008015 | blood circulation                                        | GO_BiologicalProcess-EBI-UniProt-GOA-ACAP-ARAP_08.05.2020_00h00 | 0,00145709  | 0,004759166 | 0,002315196 | 0,00381579 | [4]                                 | Group146 | 4,83  | 28,00 |

|            |                                                                              |                                                                 |             |             |             |            |                                 |          |       |       |
|------------|------------------------------------------------------------------------------|-----------------------------------------------------------------|-------------|-------------|-------------|------------|---------------------------------|----------|-------|-------|
| GO:0008217 | regulation of blood pressure                                                 | GO_BiologicalProcess-EBI-UniProt-GOA-ACAP-ARAP_08.05.2020_00h00 | 0,019399151 | 0,033754524 | 0,002315196 | 0,00381579 | [3, 5]                          | Group146 | 5,37  | 11,00 |
| GO:0098801 | regulation of renal system process                                           | GO_BiologicalProcess-EBI-UniProt-GOA-ACAP-ARAP_08.05.2020_00h00 | 0,003317585 | 0,008674669 | 0,002315196 | 0,00381579 | [4, 5]                          | Group146 | 12,82 | 5,00  |
| GO:0003073 | regulation of systemic arterial blood pressure                               | GO_BiologicalProcess-EBI-UniProt-GOA-ACAP-ARAP_08.05.2020_00h00 | 0,002397156 | 0,006951752 | 0,002315196 | 0,00381579 | [4, 6]                          | Group146 | 8,18  | 9,00  |
| GO:0003094 | glomerular filtration                                                        | GO_BiologicalProcess-EBI-UniProt-GOA-ACAP-ARAP_08.05.2020_00h00 | 0,026696119 | 0,042651396 | 0,002315196 | 0,00381579 | [5]                             | Group146 | 12,00 | 3,00  |
| GO:0003093 | regulation of glomerular filtration                                          | GO_BiologicalProcess-EBI-UniProt-GOA-ACAP-ARAP_08.05.2020_00h00 | 0,003281716 | 0,008604389 | 0,002315196 | 0,00381579 | [5, 6, 7, 9]                    | Group146 | 25,00 | 3,00  |
| GO:0090280 | positive regulation of calcium ion import                                    | GO_BiologicalProcess-EBI-UniProt-GOA-ACAP-ARAP_08.05.2020_00h00 | 0,016667997 | 0,029927343 | 0,002315196 | 0,00381579 | [5, 6, 7, 8, 9, 10, 11]         | Group146 | 14,29 | 3,00  |
| GO:0043027 | cysteine-type endopeptidase inhibitor activity involved in apoptotic process | GO_BiologicalProcess-EBI-UniProt-GOA-ACAP-ARAP_08.05.2020_00h00 | 0,032678593 | 0,04924947  | 0,002315196 | 0,00381579 | [5, 6, 7, 8, 9, 10, 11, 12, 13] | Group146 | 11,11 | 3,00  |
| GO:0046677 | response to antibiotic                                                       | GO_BiologicalProcess-EBI-UniProt-GOA-ACAP-ARAP_08.05.2020_00h00 | 0,003973101 | 0,009927566 | 0,002769187 | 0,00448105 | [3]                             | Group143 | 5,16  | 19,00 |
| GO:0071216 | cellular response to biotic stimulus                                         | GO_BiologicalProcess-EBI-UniProt-GOA-ACAP-ARAP_08.05.2020_00h00 | 0,008525003 | 0,018251516 | 0,002769187 | 0,00448105 | [3]                             | Group143 | 5,41  | 14,00 |
| GO:0071236 | cellular response to antibiotic                                              | GO_BiologicalProcess-EBI-UniProt-GOA-ACAP-ARAP_08.05.2020_00h00 | 0,011685916 | 0,023058603 | 0,002769187 | 0,00448105 | [4]                             | Group143 | 6,06  | 10,00 |
| GO:0042542 | response to hydrogen peroxide                                                | GO_BiologicalProcess-EBI-UniProt-GOA-ACAP-ARAP_08.05.2020_00h00 | 0,02252461  | 0,037685405 | 0,002769187 | 0,00448105 | [4, 5]                          | Group143 | 5,73  | 9,00  |
| GO:0002237 | response to molecule of bacterial origin                                     | GO_BiologicalProcess-EBI-UniProt-GOA-ACAP-ARAP_08.05.2020_00h00 | 0,027832035 | 0,044098109 | 0,002769187 | 0,00448105 | [4, 6]                          | Group143 | 4,37  | 17,00 |
| GO:0071347 | cellular response to interleukin-1                                           | GO_BiologicalProcess-EBI-UniProt-GOA-ACAP-ARAP_08.05.2020_00h00 | 0,000117157 | 0,000700744 | 0,002769187 | 0,00448105 | [6]                             | Group143 | 8,06  | 15,00 |
| GO:1903556 | negative regulation of tumor necrosis factor superfamily cytokine production | GO_BiologicalProcess-EBI-UniProt-GOA-ACAP-ARAP_08.05.2020_00h00 | 0,029100992 | 0,045283981 | 0,002769187 | 0,00448105 | [4, 5, 6, 7, 8]                 | Group143 | 7,58  | 5,00  |
| GO:0071222 | cellular response to lipopolysaccharide                                      | GO_BiologicalProcess-EBI-UniProt-GOA-ACAP-ARAP_08.05.2020_00h00 | 0,006491162 | 0,014651042 | 0,002769187 | 0,00448105 | [5, 6, 8]                       | Group143 | 5,78  | 13,00 |
| GO:0070997 | neuron death                                                                 | GO_BiologicalProcess-EBI-UniProt-GOA-ACAP-ARAP_08.05.2020_00h00 | 0,002958667 | 0,008043876 | 0,002958667 | 0,00470217 | [3]                             | Group050 | 5,19  | 20,00 |
| GO:1901214 | regulation of neuron death                                                   | GO_BiologicalProcess-EBI-UniProt-GOA-ACAP-ARAP_08.05.2020_00h00 | 0,01810614  | 0,031969696 | 0,002958667 | 0,00470217 | [4, 5]                          | Group050 | 4,69  | 16,00 |
| GO:0008536 | Ran GTPase binding                                                           | GO_MolecularFunction-EBI-UniProt-GOA-ACAP-ARAP_08.05.2020_00h00 | 0,002954694 | 0,008055959 | 0,002954694 | 0,00473816 | [7]                             | Group018 | 13,16 | 5,00  |
| GO:0007565 | female pregnancy                                                             | GO_BiologicalProcess-EBI-UniProt-GOA-ACAP-ARAP_08.05.2020_00h00 | 0,002029531 | 0,006205307 | 0,003226102 | 0,00508182 | [3, 4]                          | Group058 | 6,36  | 14,00 |
| GO:0007566 | embryo implantation                                                          | GO_BiologicalProcess-EBI-UniProt-GOA-ACAP-ARAP_08.05.2020_00h00 | 0,000936067 | 0,003342597 | 0,003226102 | 0,00508182 | [2, 3, 4, 5]                    | Group058 | 11,67 | 7,00  |
| GO:0033273 | response to vitamin                                                          | GO_BiologicalProcess-EBI-UniProt-GOA-ACAP-ARAP_08.05.2020_00h00 | 0,023341313 | 0,038579684 | 0,003226102 | 0,00508182 | [4, 6]                          | Group058 | 6,48  | 7,00  |
| GO:0002521 | leukocyte differentiation                                                    | GO_BiologicalProcess-EBI-UniProt-GOA-ACAP-ARAP_08.05.2020_00h00 | 0,00341803  | 0,008912955 | 0,00341803  | 0,00529052 | [4, 5, 6, 7, 8]                 | Group092 | 4,66  | 26,00 |
| GO:0030098 | lymphocyte differentiation                                                   | GO_BiologicalProcess-EBI-UniProt-GOA-ACAP-ARAP_08.05.2020_00h00 | 0,005579029 | 0,013022271 | 0,00341803  | 0,00529052 | [4, 5, 6, 7, 8, 9]              | Group092 | 5,00  | 19,00 |
| GO:0030183 | B cell differentiation                                                       | GO_BiologicalProcess-EBI-UniProt-GOA-ACAP-ARAP_08.05.2020_00h00 | 0,029878801 | 0,04604511  | 0,00341803  | 0,00529052 | [5, 6, 7, 8, 9, 10]             | Group092 | 5,76  | 8,00  |

|            |                                                                   |                                                                 |             |             |             |            |                                |          |       |       |
|------------|-------------------------------------------------------------------|-----------------------------------------------------------------|-------------|-------------|-------------|------------|--------------------------------|----------|-------|-------|
| GO:0002335 | mature B cell differentiation                                     | GO_BiologicalProcess-EBI-UniProt-GOA-ACAP-ARAP_08.05.2020_00h00 | 0,029607117 | 0,045996774 | 0,00341803  | 0,00529052 | [6, 7, 8, 9, 10, 11]           | Group092 | 11,54 | 3,00  |
| GO:0042578 | phosphoric ester hydrolase activity                               | GO_MolecularFunction-EBI-UniProt-GOA-ACAP-ARAP_08.05.2020_00h00 | 0,01470738  | 0,026911974 | 0,003392755 | 0,00529746 | [4]                            | Group095 | 4,14  | 26,00 |
| GO:0035303 | regulation of dephosphorylation                                   | GO_BiologicalProcess-EBI-UniProt-GOA-ACAP-ARAP_08.05.2020_00h00 | 0,033220664 | 0,04975301  | 0,003392755 | 0,00529746 | [6, 7]                         | Group095 | 4,93  | 11,00 |
| GO:0035306 | positive regulation of dephosphorylation                          | GO_BiologicalProcess-EBI-UniProt-GOA-ACAP-ARAP_08.05.2020_00h00 | 0,006470072 | 0,014637965 | 0,003392755 | 0,00529746 | [6, 7, 8]                      | Group095 | 9,38  | 6,00  |
| GO:0050860 | negative regulation of T cell receptor signaling pathway          | GO_BiologicalProcess-EBI-UniProt-GOA-ACAP-ARAP_08.05.2020_00h00 | 0,00033793  | 0,001562316 | 0,003392755 | 0,00529746 | [4, 5, 6, 7, 8, 9, 10, 11, 12] | Group095 | 20,83 | 5,00  |
| GO:0004725 | protein tyrosine phosphatase activity                             | GO_BiologicalProcess-EBI-UniProt-GOA-ACAP-ARAP_08.05.2020_00h00 | 0,032775592 | 0,049240567 | 0,003392755 | 0,00529746 | [8, 9]                         | Group095 | 6,03  | 7,00  |
| GO:0015931 | nucleobase-containing compound transport                          | GO_BiologicalProcess-EBI-UniProt-GOA-ACAP-ARAP_08.05.2020_00h00 | 0,032646921 | 0,04927934  | 0,004215118 | 0,00646803 | [5]                            | Group110 | 4,66  | 13,00 |
| GO:0015932 | nucleobase-containing compound transmembrane transporter activity | GO_BiologicalProcess-EBI-UniProt-GOA-ACAP-ARAP_08.05.2020_00h00 | 0,017647753 | 0,031333763 | 0,004215118 | 0,00646803 | [4, 6]                         | Group110 | 8,62  | 5,00  |
| GO:1901505 | carbohydrate derivative transmembrane transporter activity        | GO_BiologicalProcess-EBI-UniProt-GOA-ACAP-ARAP_08.05.2020_00h00 | 0,021512173 | 0,036308907 | 0,004215118 | 0,00646803 | [4, 6]                         | Group110 | 8,20  | 5,00  |
| GO:0006862 | nucleotide transport                                              | GO_BiologicalProcess-EBI-UniProt-GOA-ACAP-ARAP_08.05.2020_00h00 | 0,023646265 | 0,038949184 | 0,004215118 | 0,00646803 | [6]                            | Group110 | 9,52  | 4,00  |
| GO:0006611 | protein export from nucleus                                       | GO_BiologicalProcess-EBI-UniProt-GOA-ACAP-ARAP_08.05.2020_00h00 | 0,030000042 | 0,046157621 | 0,004215118 | 0,00646803 | [5, 6, 7, 8, 9]                | Group110 | 5,21  | 10,00 |
| GO:0006493 | protein O-linked glycosylation                                    | GO_BiologicalProcess-EBI-UniProt-GOA-ACAP-ARAP_08.05.2020_00h00 | 0,004298435 | 0,010467182 | 0,004298435 | 0,0065395  | [5, 7, 8]                      | Group055 | 7,50  | 9,00  |
| GO:0016266 | O-glycan processing                                               | GO_BiologicalProcess-EBI-UniProt-GOA-ACAP-ARAP_08.05.2020_00h00 | 0,029100992 | 0,045283981 | 0,004298435 | 0,0065395  | [6, 8, 9]                      | Group055 | 7,58  | 5,00  |
| GO:0005976 | polysaccharide metabolic process                                  | GO_BiologicalProcess-EBI-UniProt-GOA-ACAP-ARAP_08.05.2020_00h00 | 0,00532592  | 0,012492415 | 0,004358792 | 0,00657513 | [4]                            | Group089 | 7,26  | 9,00  |
| GO:0006022 | aminoglycan metabolic process                                     | GO_BiologicalProcess-EBI-UniProt-GOA-ACAP-ARAP_08.05.2020_00h00 | 0,01962244  | 0,034081079 | 0,004358792 | 0,00657513 | [4]                            | Group089 | 5,59  | 10,00 |
| GO:0000271 | polysaccharide biosynthetic process                               | GO_BiologicalProcess-EBI-UniProt-GOA-ACAP-ARAP_08.05.2020_00h00 | 0,007299894 | 0,016133945 | 0,004358792 | 0,00657513 | [5]                            | Group089 | 8,14  | 7,00  |
| GO:0030212 | hyaluronan metabolic process                                      | GO_BiologicalProcess-EBI-UniProt-GOA-ACAP-ARAP_08.05.2020_00h00 | 0,005625159 | 0,013066206 | 0,004358792 | 0,00657513 | [6, 7]                         | Group089 | 11,36 | 5,00  |
| GO:0062012 | regulation of small molecule metabolic process                    | GO_BiologicalProcess-EBI-UniProt-GOA-ACAP-ARAP_08.05.2020_00h00 | 0,027698154 | 0,043958761 | 0,004643952 | 0,00694642 | [3, 4]                         | Group155 | 4,18  | 20,00 |
| GO:0055086 | nucleobase-containing small molecule metabolic process            | GO_BiologicalProcess-EBI-UniProt-GOA-ACAP-ARAP_08.05.2020_00h00 | 0,003933324 | 0,009853902 | 0,004643952 | 0,00694642 | [3, 4, 5]                      | Group155 | 4,41  | 30,00 |
| GO:0062013 | positive regulation of small molecule metabolic process           | GO_BiologicalProcess-EBI-UniProt-GOA-ACAP-ARAP_08.05.2020_00h00 | 0,008775524 | 0,018580036 | 0,004643952 | 0,00694642 | [3, 4, 5]                      | Group155 | 6,33  | 10,00 |
| GO:0006109 | regulation of carbohydrate metabolic process                      | GO_BiologicalProcess-EBI-UniProt-GOA-ACAP-ARAP_08.05.2020_00h00 | 0,006973192 | 0,015555582 | 0,004643952 | 0,00694642 | [4, 5]                         | Group155 | 5,73  | 13,00 |
| GO:0006140 | regulation of nucleotide metabolic process                        | GO_BiologicalProcess-EBI-UniProt-GOA-ACAP-ARAP_08.05.2020_00h00 | 0,023751667 | 0,039055575 | 0,004643952 | 0,00694642 | [4, 5, 6, 7, 8]                | Group155 | 6,02  | 8,00  |
| GO:0009117 | nucleotide metabolic process                                      | GO_BiologicalProcess-EBI-UniProt-GOA-ACAP-ARAP_08.05.2020_00h00 | 0,022016035 | 0,036963765 | 0,004643952 | 0,00694642 | [5, 6, 7]                      | Group155 | 4,07  | 24,00 |

|            |                                                                  |                                                                 |             |             |             |            |                             |          |       |       |
|------------|------------------------------------------------------------------|-----------------------------------------------------------------|-------------|-------------|-------------|------------|-----------------------------|----------|-------|-------|
| GO:0045980 | negative regulation of nucleotide metabolic process              | GO_BiologicalProcess-EBI-UniProt-GOA-ACAP-ARAP_08.05.2020_00h00 | 0,021358484 | 0,036113199 | 0,004643952 | 0,00694642 | [4, 5, 6, 7, 8, 9]          | Group155 | 13,04 | 3,00  |
| GO:0009167 | purine ribonucleoside monophosphate metabolic process            | GO_BiologicalProcess-EBI-UniProt-GOA-ACAP-ARAP_08.05.2020_00h00 | 0,020105848 | 0,034731582 | 0,004643952 | 0,00694642 | [7, 8, 9]                   | Group155 | 10,00 | 4,00  |
| GO:0009179 | purine ribonucleoside diphosphate metabolic process              | GO_BiologicalProcess-EBI-UniProt-GOA-ACAP-ARAP_08.05.2020_00h00 | 0,007714132 | 0,01689342  | 0,004643952 | 0,00694642 | [7, 8, 9]                   | Group155 | 6,45  | 10,00 |
| GO:2001169 | regulation of ATP biosynthetic process                           | GO_BiologicalProcess-EBI-UniProt-GOA-ACAP-ARAP_08.05.2020_00h00 | 0,014564467 | 0,026855865 | 0,004643952 | 0,00694642 | [4, 5, 7, 8, 9, 10, 11, 12] | Group155 | 15,00 | 3,00  |
| GO:0045992 | negative regulation of embryonic development                     | GO_BiologicalProcess-EBI-UniProt-GOA-ACAP-ARAP_08.05.2020_00h00 | 0,032678593 | 0,04924947  | 0,004808458 | 0,00713255 | [3, 4, 5, 6]                | Group096 | 11,11 | 3,00  |
| GO:0007219 | Notch signaling pathway                                          | GO_BiologicalProcess-EBI-UniProt-GOA-ACAP-ARAP_08.05.2020_00h00 | 0,002203569 | 0,006549115 | 0,004808458 | 0,00713255 | [4, 5, 6]                   | Group096 | 6,57  | 13,00 |
| GO:0008593 | regulation of Notch signaling pathway                            | GO_BiologicalProcess-EBI-UniProt-GOA-ACAP-ARAP_08.05.2020_00h00 | 0,007866058 | 0,017108677 | 0,004808458 | 0,00713255 | [4, 5, 6, 7]                | Group096 | 7,34  | 8,00  |
| GO:0045746 | negative regulation of Notch signaling pathway                   | GO_BiologicalProcess-EBI-UniProt-GOA-ACAP-ARAP_08.05.2020_00h00 | 0,004597845 | 0,011111458 | 0,004808458 | 0,00713255 | [4, 5, 6, 7, 8]             | Group096 | 11,90 | 5,00  |
| GO:0048708 | astrocyte differentiation                                        | GO_BiologicalProcess-EBI-UniProt-GOA-ACAP-ARAP_08.05.2020_00h00 | 0,027841724 | 0,043967873 | 0,004808458 | 0,00713255 | [5, 6, 7, 8, 9]             | Group096 | 6,82  | 6,00  |
| GO:0006022 | aminoglycan metabolic process                                    | GO_BiologicalProcess-EBI-UniProt-GOA-ACAP-ARAP_08.05.2020_00h00 | 0,01962244  | 0,034081079 | 0,005321251 | 0,00776379 | [4]                         | Group093 | 5,59  | 10,00 |
| GO:0032885 | regulation of polysaccharide biosynthetic process                | GO_BiologicalProcess-EBI-UniProt-GOA-ACAP-ARAP_08.05.2020_00h00 | 0,023646265 | 0,038949184 | 0,005321251 | 0,00776379 | [5, 6, 7]                   | Group093 | 9,52  | 4,00  |
| GO:1904707 | positive regulation of vascular smooth muscle cell proliferation | GO_BiologicalProcess-EBI-UniProt-GOA-ACAP-ARAP_08.05.2020_00h00 | 0,015443421 | 0,028044315 | 0,005321251 | 0,00776379 | [5, 6, 7]                   | Group093 | 10,81 | 4,00  |
| GO:0030212 | hyaluronan metabolic process                                     | GO_BiologicalProcess-EBI-UniProt-GOA-ACAP-ARAP_08.05.2020_00h00 | 0,005625159 | 0,013066206 | 0,005321251 | 0,00776379 | [6, 7]                      | Group093 | 11,36 | 5,00  |
| GO:0050764 | regulation of phagocytosis                                       | GO_BiologicalProcess-EBI-UniProt-GOA-ACAP-ARAP_08.05.2020_00h00 | 0,005313152 | 0,012523859 | 0,005313152 | 0,00781604 | [4, 5, 6]                   | Group021 | 7,84  | 8,00  |
| GO:0050918 | positive chemotaxis                                              | GO_BiologicalProcess-EBI-UniProt-GOA-ACAP-ARAP_08.05.2020_00h00 | 0,005643533 | 0,013077145 | 0,005643533 | 0,0081012  | [4, 5]                      | Group023 | 8,54  | 7,00  |
| GO:0048592 | eye morphogenesis                                                | GO_BiologicalProcess-EBI-UniProt-GOA-ACAP-ARAP_08.05.2020_00h00 | 0,027837381 | 0,044033676 | 0,005636813 | 0,00815734 | [5, 6, 7, 8]                | Group103 | 5,52  | 9,00  |
| GO:0002088 | lens development in camera-type eye                              | GO_BiologicalProcess-EBI-UniProt-GOA-ACAP-ARAP_08.05.2020_00h00 | 0,009845688 | 0,020263061 | 0,005636813 | 0,00815734 | [3, 7, 8, 9]                | Group103 | 7,69  | 7,00  |
| GO:0002089 | lens morphogenesis in camera-type eye                            | GO_BiologicalProcess-EBI-UniProt-GOA-ACAP-ARAP_08.05.2020_00h00 | 0,018932438 | 0,03306267  | 0,005636813 | 0,00815734 | [3, 4, 7, 8, 9, 10]         | Group103 | 13,64 | 3,00  |
| GO:0055024 | regulation of cardiac muscle tissue development                  | GO_BiologicalProcess-EBI-UniProt-GOA-ACAP-ARAP_08.05.2020_00h00 | 0,008760029 | 0,018588355 | 0,005636813 | 0,00815734 | [5, 6, 7, 8, 9]             | Group103 | 7,87  | 7,00  |
| GO:0070306 | lens fiber cell differentiation                                  | GO_BiologicalProcess-EBI-UniProt-GOA-ACAP-ARAP_08.05.2020_00h00 | 0,015443421 | 0,028044315 | 0,005636813 | 0,00815734 | [4, 5, 6, 8, 9, 10]         | Group103 | 10,81 | 4,00  |
| GO:2000249 | regulation of actin cytoskeleton reorganization                  | GO_BiologicalProcess-EBI-UniProt-GOA-ACAP-ARAP_08.05.2020_00h00 | 0,006195141 | 0,01411607  | 0,006195141 | 0,00882188 | [5, 6, 7, 8]                | Group035 | 11,11 | 5,00  |
| GO:0010661 | positive regulation of muscle cell apoptotic process             | GO_BiologicalProcess-EBI-UniProt-GOA-ACAP-ARAP_08.05.2020_00h00 | 0,00654021  | 0,014727013 | 0,00654021  | 0,00923934 | [6, 7, 8]                   | Group038 | 13,79 | 4,00  |
| GO:0035019 | somatic stem cell population maintenance                         | GO_BiologicalProcess-EBI-UniProt-GOA-ACAP-ARAP_08.05.2020_00h00 | 0,020465165 | 0,034911167 | 0,006930633 | 0,0097138  | [3, 4]                      | Group088 | 7,32  | 6,00  |

|            |                                                                            |                                                                 |             |             |             |            |                             |          |       |       |
|------------|----------------------------------------------------------------------------|-----------------------------------------------------------------|-------------|-------------|-------------|------------|-----------------------------|----------|-------|-------|
| GO:0006140 | regulation of nucleotide metabolic process                                 | GO_BiologicalProcess-EBI-UniProt-GOA-ACAP-ARAP_08.05.2020_00h00 | 0,023751667 | 0,039055575 | 0,006930633 | 0,0097138  | [4, 5, 6, 7, 8]             | Group088 | 6,02  | 8,00  |
| GO:0009179 | purine ribonucleoside diphosphate metabolic process                        | GO_BiologicalProcess-EBI-UniProt-GOA-ACAP-ARAP_08.05.2020_00h00 | 0,007714132 | 0,01689342  | 0,006930633 | 0,0097138  | [7, 8, 9]                   | Group088 | 6,45  | 10,00 |
| GO:2001169 | regulation of ATP biosynthetic process                                     | GO_BiologicalProcess-EBI-UniProt-GOA-ACAP-ARAP_08.05.2020_00h00 | 0,014564467 | 0,026855865 | 0,006930633 | 0,0097138  | [4, 5, 7, 8, 9, 10, 11, 12] | Group088 | 15,00 | 3,00  |
| GO:0001501 | skeletal system development                                                | GO_BiologicalProcess-EBI-UniProt-GOA-ACAP-ARAP_08.05.2020_00h00 | 0,007357109 | 0,016222933 | 0,007357109 | 0,01023098 | [4, 5]                      | Group037 | 4,44  | 25,00 |
| GO:0051817 | modulation of process of other organism involved in symbiotic interaction  | GO_BiologicalProcess-EBI-UniProt-GOA-ACAP-ARAP_08.05.2020_00h00 | 0,007866058 | 0,017108677 | 0,007866058 | 0,01085394 | [3]                         | Group044 | 7,34  | 8,00  |
| GO:0044794 | positive regulation by host of viral process                               | GO_BiologicalProcess-EBI-UniProt-GOA-ACAP-ARAP_08.05.2020_00h00 | 0,010835065 | 0,021783942 | 0,007866058 | 0,01085394 | [3, 4, 5, 6]                | Group044 | 16,67 | 3,00  |
| GO:0048863 | stem cell differentiation                                                  | GO_BiologicalProcess-EBI-UniProt-GOA-ACAP-ARAP_08.05.2020_00h00 | 0,014694748 | 0,02694037  | 0,008115702 | 0,01111227 | [4]                         | Group045 | 5,05  | 14,00 |
| GO:0060485 | mesenchyme development                                                     | GO_BiologicalProcess-EBI-UniProt-GOA-ACAP-ARAP_08.05.2020_00h00 | 0,022654012 | 0,037835758 | 0,008115702 | 0,01111227 | [4, 5, 6]                   | Group045 | 4,78  | 14,00 |
| GO:0007569 | cell aging                                                                 | GO_BiologicalProcess-EBI-UniProt-GOA-ACAP-ARAP_08.05.2020_00h00 | 0,032775592 | 0,049240567 | 0,008240161 | 0,01119655 | [3]                         | Group087 | 6,03  | 7,00  |
| GO:2000772 | regulation of cellular senescence                                          | GO_BiologicalProcess-EBI-UniProt-GOA-ACAP-ARAP_08.05.2020_00h00 | 0,005625159 | 0,013066206 | 0,008240161 | 0,01119655 | [4, 5, 6]                   | Group087 | 11,36 | 5,00  |
| GO:2000773 | negative regulation of cellular senescence                                 | GO_BiologicalProcess-EBI-UniProt-GOA-ACAP-ARAP_08.05.2020_00h00 | 0,012620698 | 0,024499003 | 0,008240161 | 0,01119655 | [3, 4, 5, 6, 7]             | Group087 | 15,79 | 3,00  |
| GO:0071479 | cellular response to ionizing radiation                                    | GO_BiologicalProcess-EBI-UniProt-GOA-ACAP-ARAP_08.05.2020_00h00 | 0,020465165 | 0,034911167 | 0,008240161 | 0,01119655 | [5, 6]                      | Group087 | 7,32  | 6,00  |
| GO:0071218 | cellular response to misfolded protein                                     | GO_BiologicalProcess-EBI-UniProt-GOA-ACAP-ARAP_08.05.2020_00h00 | 0,018932438 | 0,03306267  | 0,008316356 | 0,01121448 | [5, 6]                      | Group047 | 13,64 | 3,00  |
| GO:0006515 | protein quality control for misfolded or incompletely synthesized proteins | GO_BiologicalProcess-EBI-UniProt-GOA-ACAP-ARAP_08.05.2020_00h00 | 0,005755048 | 0,013271279 | 0,008316356 | 0,01121448 | [6, 7, 8]                   | Group047 | 14,29 | 4,00  |
| GO:0046620 | regulation of organ growth                                                 | GO_BiologicalProcess-EBI-UniProt-GOA-ACAP-ARAP_08.05.2020_00h00 | 0,024403341 | 0,039853238 | 0,008570778 | 0,01138506 | [3, 4, 5]                   | Group086 | 6,42  | 7,00  |
| GO:0003170 | heart valve development                                                    | GO_BiologicalProcess-EBI-UniProt-GOA-ACAP-ARAP_08.05.2020_00h00 | 0,029100992 | 0,045283981 | 0,008570778 | 0,01138506 | [3, 5, 6, 7]                | Group086 | 7,58  | 5,00  |
| GO:0055024 | regulation of cardiac muscle tissue development                            | GO_BiologicalProcess-EBI-UniProt-GOA-ACAP-ARAP_08.05.2020_00h00 | 0,008760029 | 0,018588355 | 0,008570778 | 0,01138506 | [5, 6, 7, 8, 9]             | Group086 | 7,87  | 7,00  |
| GO:2000725 | regulation of cardiac muscle cell differentiation                          | GO_BiologicalProcess-EBI-UniProt-GOA-ACAP-ARAP_08.05.2020_00h00 | 0,020105848 | 0,034731582 | 0,008570778 | 0,01138506 | [5, 6, 7, 8, 9, 10]         | Group086 | 10,00 | 4,00  |
| GO:0071496 | cellular response to external stimulus                                     | GO_BiologicalProcess-EBI-UniProt-GOA-ACAP-ARAP_08.05.2020_00h00 | 0,008531612 | 0,018224895 | 0,008531612 | 0,01141825 | [3]                         | Group077 | 4,89  | 18,00 |
| GO:0031668 | cellular response to extracellular stimulus                                | GO_BiologicalProcess-EBI-UniProt-GOA-ACAP-ARAP_08.05.2020_00h00 | 0,019883081 | 0,034471214 | 0,008531612 | 0,01141825 | [3, 4]                      | Group077 | 4,86  | 14,00 |
| GO:0009267 | cellular response to starvation                                            | GO_BiologicalProcess-EBI-UniProt-GOA-ACAP-ARAP_08.05.2020_00h00 | 0,026896063 | 0,042899221 | 0,008531612 | 0,01141825 | [4, 5, 6]                   | Group077 | 5,56  | 9,00  |
| GO:0042149 | cellular response to glucose starvation                                    | GO_BiologicalProcess-EBI-UniProt-GOA-ACAP-ARAP_08.05.2020_00h00 | 0,025549145 | 0,041231927 | 0,008531612 | 0,01141825 | [5, 6, 7]                   | Group077 | 9,30  | 4,00  |
| GO:0048145 | regulation of fibroblast proliferation                                     | GO_BiologicalProcess-EBI-UniProt-GOA-ACAP-ARAP_08.05.2020_00h00 | 0,008760029 | 0,018588355 | 0,008760029 | 0,01155026 | [4, 5]                      | Group017 | 7,87  | 7,00  |

|            |                                                                         |                                                                 |             |             |             |            |                     |          |       |       |
|------------|-------------------------------------------------------------------------|-----------------------------------------------------------------|-------------|-------------|-------------|------------|---------------------|----------|-------|-------|
| GO:0120193 | tight junction organization                                             | GO_BiologicalProcess-EBI-UniProt-GOA-ACAP-ARAP_08.05.2020_00h00 | 0,00929126  | 0,019456752 | 0,00929126  | 0,01198438 | [6]                 | Group049 | 7,78  | 7,00  |
| GO:0070830 | bicellular tight junction assembly                                      | GO_BiologicalProcess-EBI-UniProt-GOA-ACAP-ARAP_08.05.2020_00h00 | 0,022756126 | 0,037940092 | 0,00929126  | 0,01198438 | [8]                 | Group049 | 7,14  | 6,00  |
| GO:0030856 | regulation of epithelial cell differentiation                           | GO_BiologicalProcess-EBI-UniProt-GOA-ACAP-ARAP_08.05.2020_00h00 | 0,02252461  | 0,037685405 | 0,009262776 | 0,01203485 | [4, 5, 6]           | Group073 | 5,73  | 9,00  |
| GO:0030858 | positive regulation of epithelial cell differentiation                  | GO_BiologicalProcess-EBI-UniProt-GOA-ACAP-ARAP_08.05.2020_00h00 | 0,025888894 | 0,041569918 | 0,009262776 | 0,01203485 | [4, 5, 6, 7]        | Group073 | 7,81  | 5,00  |
| GO:2000352 | negative regulation of endothelial cell apoptotic process               | GO_BiologicalProcess-EBI-UniProt-GOA-ACAP-ARAP_08.05.2020_00h00 | 0,008316356 | 0,017884837 | 0,009262776 | 0,01203485 | [7, 8, 9]           | Group073 | 12,90 | 4,00  |
| GO:0051782 | negative regulation of cell division                                    | GO_BiologicalProcess-EBI-UniProt-GOA-ACAP-ARAP_08.05.2020_00h00 | 0,009205425 | 0,019319279 | 0,009205425 | 0,01204828 | [3, 4, 5]           | Group027 | 17,65 | 3,00  |
| GO:0019211 | phosphatase activator activity                                          | GO_BiologicalProcess-EBI-UniProt-GOA-ACAP-ARAP_08.05.2020_00h00 | 0,009205425 | 0,019319279 | 0,009205425 | 0,01204828 | [6, 8]              | Group040 | 17,65 | 3,00  |
| GO:0019751 | polyol metabolic process                                                | GO_BiologicalProcess-EBI-UniProt-GOA-ACAP-ARAP_08.05.2020_00h00 | 0,006168251 | 0,014088344 | 0,009676366 | 0,01239132 | [4, 5]              | Group098 | 6,67  | 10,00 |
| GO:0046165 | alcohol biosynthetic process                                            | GO_BiologicalProcess-EBI-UniProt-GOA-ACAP-ARAP_08.05.2020_00h00 | 0,029087059 | 0,045336019 | 0,009676366 | 0,01239132 | [4, 5]              | Group098 | 5,24  | 10,00 |
| GO:0046173 | polyol biosynthetic process                                             | GO_BiologicalProcess-EBI-UniProt-GOA-ACAP-ARAP_08.05.2020_00h00 | 0,00929126  | 0,019456752 | 0,009676366 | 0,01239132 | [5, 6]              | Group098 | 7,78  | 7,00  |
| GO:0004435 | phosphatidylinositol phospholipase C activity                           | GO_MolecularFunction-EBI-UniProt-GOA-ACAP-ARAP_08.05.2020_00h00 | 0,032678593 | 0,04924947  | 0,009676366 | 0,01239132 | [7]                 | Group098 | 11,11 | 3,00  |
| GO:0032959 | inositol trisphosphate biosynthetic process                             | GO_BiologicalProcess-EBI-UniProt-GOA-ACAP-ARAP_08.05.2020_00h00 | 0,026696119 | 0,042651396 | 0,009676366 | 0,01239132 | [6, 7, 8]           | Group098 | 12,00 | 3,00  |
| GO:1905114 | cell surface receptor signaling pathway involved in cell-cell signaling | GO_BiologicalProcess-EBI-UniProt-GOA-ACAP-ARAP_08.05.2020_00h00 | 0,010511293 | 0,021222169 | 0,010511293 | 0,01336436 | [3, 4, 5, 6]        | Group139 | 4,10  | 30,00 |
| GO:0016055 | Wnt signaling pathway                                                   | GO_BiologicalProcess-EBI-UniProt-GOA-ACAP-ARAP_08.05.2020_00h00 | 0,002622226 | 0,007380795 | 0,010511293 | 0,01336436 | [4, 5, 6, 7]        | Group139 | 4,75  | 26,00 |
| GO:0030111 | regulation of Wnt signaling pathway                                     | GO_BiologicalProcess-EBI-UniProt-GOA-ACAP-ARAP_08.05.2020_00h00 | 0,007104552 | 0,015738556 | 0,010511293 | 0,01336436 | [4, 5, 6, 7, 8]     | Group139 | 4,88  | 19,00 |
| GO:0030177 | positive regulation of Wnt signaling pathway                            | GO_BiologicalProcess-EBI-UniProt-GOA-ACAP-ARAP_08.05.2020_00h00 | 0,000124381 | 0,000734769 | 0,010511293 | 0,01336436 | [4, 5, 6, 7, 8, 9]  | Group139 | 8,02  | 15,00 |
| GO:0060070 | canonical Wnt signaling pathway                                         | GO_BiologicalProcess-EBI-UniProt-GOA-ACAP-ARAP_08.05.2020_00h00 | 0,022989346 | 0,038195841 | 0,010511293 | 0,01336436 | [5, 6, 7, 8]        | Group139 | 4,56  | 16,00 |
| GO:0060828 | regulation of canonical Wnt signaling pathway                           | GO_BiologicalProcess-EBI-UniProt-GOA-ACAP-ARAP_08.05.2020_00h00 | 0,013665481 | 0,025896763 | 0,010511293 | 0,01336436 | [5, 6, 7, 8, 9]     | Group139 | 4,97  | 15,00 |
| GO:0090263 | positive regulation of canonical Wnt signaling pathway                  | GO_BiologicalProcess-EBI-UniProt-GOA-ACAP-ARAP_08.05.2020_00h00 | 0,000592761 | 0,002373526 | 0,010511293 | 0,01336436 | [5, 6, 7, 8, 9, 10] | Group139 | 8,00  | 12,00 |
| GO:1903209 | positive regulation of oxidative stress-induced cell death              | GO_BiologicalProcess-EBI-UniProt-GOA-ACAP-ARAP_08.05.2020_00h00 | 0,010835065 | 0,021783942 | 0,010835065 | 0,01367831 | [4, 5, 6, 7, 8]     | Group034 | 16,67 | 3,00  |
| GO:0071850 | mitotic cell cycle arrest                                               | GO_BiologicalProcess-EBI-UniProt-GOA-ACAP-ARAP_08.05.2020_00h00 | 0,016667997 | 0,029927343 | 0,011528101 | 0,01445072 | [4, 5, 6, 7]        | Group048 | 14,29 | 3,00  |
| GO:0007096 | regulation of exit from mitosis                                         | GO_BiologicalProcess-EBI-UniProt-GOA-ACAP-ARAP_08.05.2020_00h00 | 0,012620698 | 0,024499003 | 0,011528101 | 0,01445072 | [5, 6, 7, 8, 9]     | Group048 | 15,79 | 3,00  |
| GO:0045927 | positive regulation of growth                                           | GO_BiologicalProcess-EBI-UniProt-GOA-ACAP-ARAP_08.05.2020_00h00 | 0,01690525  | 0,030296486 | 0,011754811 | 0,01463186 | [2, 3, 4]           | Group128 | 4,96  | 14,00 |

|            |                                                                                            |                                                                 |             |             |             |            |                              |          |       |       |
|------------|--------------------------------------------------------------------------------------------|-----------------------------------------------------------------|-------------|-------------|-------------|------------|------------------------------|----------|-------|-------|
| GO:0035019 | somatic stem cell population maintenance                                                   | GO_BiologicalProcess-EBI-UniProt-GOA-ACAP-ARAP_08.05.2020_00h00 | 0,020465165 | 0,034911167 | 0,011754811 | 0,01463186 | [3, 4]                       | Group128 | 7,32  | 6,00  |
| GO:0046620 | regulation of organ growth                                                                 | GO_BiologicalProcess-EBI-UniProt-GOA-ACAP-ARAP_08.05.2020_00h00 | 0,024403341 | 0,039853238 | 0,011754811 | 0,01463186 | [3, 4, 5]                    | Group128 | 6,42  | 7,00  |
| GO:0055024 | regulation of cardiac muscle tissue development                                            | GO_BiologicalProcess-EBI-UniProt-GOA-ACAP-ARAP_08.05.2020_00h00 | 0,008760029 | 0,018588355 | 0,011754811 | 0,01463186 | [5, 6, 7, 8, 9]              | Group128 | 7,87  | 7,00  |
| GO:0060487 | lung epithelial cell differentiation                                                       | GO_BiologicalProcess-EBI-UniProt-GOA-ACAP-ARAP_08.05.2020_00h00 | 0,018932438 | 0,03306267  | 0,011754811 | 0,01463186 | [5, 6, 7, 8, 9]              | Group128 | 13,64 | 3,00  |
| GO:0060043 | regulation of cardiac muscle cell proliferation                                            | GO_BiologicalProcess-EBI-UniProt-GOA-ACAP-ARAP_08.05.2020_00h00 | 0,031797417 | 0,04830179  | 0,011754811 | 0,01463186 | [4, 5, 6, 7, 8, 9, 10, 11]   | Group128 | 8,70  | 4,00  |
| GO:0035019 | somatic stem cell population maintenance                                                   | GO_BiologicalProcess-EBI-UniProt-GOA-ACAP-ARAP_08.05.2020_00h00 | 0,020465165 | 0,034911167 | 0,012154936 | 0,01502485 | [3, 4]                       | Group083 | 7,32  | 6,00  |
| GO:0060487 | lung epithelial cell differentiation                                                       | GO_BiologicalProcess-EBI-UniProt-GOA-ACAP-ARAP_08.05.2020_00h00 | 0,018932438 | 0,03306267  | 0,012154936 | 0,01502485 | [5, 6, 7, 8, 9]              | Group083 | 13,64 | 3,00  |
| GO:0060043 | regulation of cardiac muscle cell proliferation                                            | GO_BiologicalProcess-EBI-UniProt-GOA-ACAP-ARAP_08.05.2020_00h00 | 0,031797417 | 0,04830179  | 0,012154936 | 0,01502485 | [4, 5, 6, 7, 8, 9, 10, 11]   | Group083 | 8,70  | 4,00  |
| GO:0036003 | positive regulation of transcription from RNA polymerase II promoter in response to stress | GO_BiologicalProcess-EBI-UniProt-GOA-ACAP-ARAP_08.05.2020_00h00 | 0,008316356 | 0,017884837 | 0,012154936 | 0,01502485 | [6, 7, 8, 9, 10, 11, 12, 13] | Group083 | 12,90 | 4,00  |
| GO:0071214 | cellular response to abiotic stimulus                                                      | GO_BiologicalProcess-EBI-UniProt-GOA-ACAP-ARAP_08.05.2020_00h00 | 0,011601744 | 0,022987306 | 0,012251197 | 0,0150394  | [3, 4]                       | Group085 | 4,74  | 18,00 |
| GO:0010212 | response to ionizing radiation                                                             | GO_BiologicalProcess-EBI-UniProt-GOA-ACAP-ARAP_08.05.2020_00h00 | 0,029789085 | 0,045980893 | 0,012251197 | 0,0150394  | [4]                          | Group085 | 5,45  | 9,00  |
| GO:2000773 | negative regulation of cellular senescence                                                 | GO_BiologicalProcess-EBI-UniProt-GOA-ACAP-ARAP_08.05.2020_00h00 | 0,012620698 | 0,024499003 | 0,012251197 | 0,0150394  | [3, 4, 5, 6, 7]              | Group085 | 15,79 | 3,00  |
| GO:0071479 | cellular response to ionizing radiation                                                    | GO_BiologicalProcess-EBI-UniProt-GOA-ACAP-ARAP_08.05.2020_00h00 | 0,020465165 | 0,034911167 | 0,012251197 | 0,0150394  | [5, 6]                       | Group085 | 7,32  | 6,00  |
| GO:0008544 | epidermis development                                                                      | GO_BiologicalProcess-EBI-UniProt-GOA-ACAP-ARAP_08.05.2020_00h00 | 0,012401821 | 0,024271049 | 0,012401821 | 0,01512003 | [4]                          | Group020 | 4,41  | 22,00 |
| GO:0034501 | protein localization to kinetochore                                                        | GO_BiologicalProcess-EBI-UniProt-GOA-ACAP-ARAP_08.05.2020_00h00 | 0,012620698 | 0,024499003 | 0,012620698 | 0,01528221 | [8]                          | Group004 | 15,79 | 3,00  |
| GO:0009415 | response to water                                                                          | GO_BiologicalProcess-EBI-UniProt-GOA-ACAP-ARAP_08.05.2020_00h00 | 0,012620698 | 0,024499003 | 0,012620698 | 0,01528221 | [3, 4]                       | Group028 | 15,79 | 3,00  |
| GO:0050873 | brown fat cell differentiation                                                             | GO_BiologicalProcess-EBI-UniProt-GOA-ACAP-ARAP_08.05.2020_00h00 | 0,013251976 | 0,025466148 | 0,013251976 | 0,01593819 | [5]                          | Group022 | 9,26  | 5,00  |
| GO:0019956 | chemokine binding                                                                          | GO_MolecularFunction-EBI-UniProt-GOA-ACAP-ARAP_08.05.2020_00h00 | 0,014057252 | 0,026326399 | 0,014057252 | 0,01646178 | [4]                          | Group041 | 11,11 | 4,00  |
| GO:0043276 | anoikis                                                                                    | GO_BiologicalProcess-EBI-UniProt-GOA-ACAP-ARAP_08.05.2020_00h00 | 0,014057252 | 0,026326399 | 0,014057252 | 0,01646178 | [5]                          | Group054 | 11,11 | 4,00  |
| GO:2000209 | regulation of anoikis                                                                      | GO_BiologicalProcess-EBI-UniProt-GOA-ACAP-ARAP_08.05.2020_00h00 | 0,029607117 | 0,045996774 | 0,014057252 | 0,01646178 | [6, 7]                       | Group054 | 11,54 | 3,00  |
| GO:0008191 | metalloendopeptidase inhibitor activity                                                    | GO_BiologicalProcess-EBI-UniProt-GOA-ACAP-ARAP_08.05.2020_00h00 | 0,009205425 | 0,019319279 | 0,013796489 | 0,01648171 | [8, 9, 10, 11, 12]           | Group069 | 17,65 | 3,00  |
| GO:0008237 | metallopeptidase activity                                                                  | GO_BiologicalProcess-EBI-UniProt-GOA-ACAP-ARAP_08.05.2020_00h00 | 0,013796489 | 0,026041893 | 0,013796489 | 0,01648171 | [7, 8]                       | Group069 | 5,43  | 12,00 |
| GO:1905048 | regulation of metallopeptidase activity                                                    | GO_BiologicalProcess-EBI-UniProt-GOA-ACAP-ARAP_08.05.2020_00h00 | 0,001606011 | 0,005140308 | 0,013796489 | 0,01648171 | [6, 7, 8, 9]                 | Group069 | 20,00 | 4,00  |

|            |                                                                        |                                                                 |             |             |             |            |                      |          |       |       |
|------------|------------------------------------------------------------------------|-----------------------------------------------------------------|-------------|-------------|-------------|------------|----------------------|----------|-------|-------|
| GO:0030258 | lipid modification                                                     | GO_BiologicalProcess-EBI-UniProt-GOA-ACAP-ARAP_08.05.2020_00h00 | 0,027085837 | 0,043130025 | 0,014310171 | 0,01654033 | [4, 5]               | Group081 | 4,56  | 15,00 |
| GO:0046834 | lipid phosphorylation                                                  | GO_BiologicalProcess-EBI-UniProt-GOA-ACAP-ARAP_08.05.2020_00h00 | 0,005052869 | 0,011969296 | 0,014310171 | 0,01654033 | [5, 6]               | Group081 | 7,32  | 9,00  |
| GO:1904707 | positive regulation of vascular smooth muscle cell proliferation       | GO_BiologicalProcess-EBI-UniProt-GOA-ACAP-ARAP_08.05.2020_00h00 | 0,015443421 | 0,028044315 | 0,014310171 | 0,01654033 | [5, 6, 7]            | Group081 | 10,81 | 4,00  |
| GO:0043550 | regulation of lipid kinase activity                                    | GO_BiologicalProcess-EBI-UniProt-GOA-ACAP-ARAP_08.05.2020_00h00 | 0,030797191 | 0,047081329 | 0,014310171 | 0,01654033 | [5, 6, 7, 8, 9]      | Group081 | 7,46  | 5,00  |
| GO:0016051 | carbohydrate biosynthetic process                                      | GO_BiologicalProcess-EBI-UniProt-GOA-ACAP-ARAP_08.05.2020_00h00 | 0,029786352 | 0,046050951 | 0,013954064 | 0,01655882 | [4]                  | Group061 | 4,86  | 12,00 |
| GO:0043271 | negative regulation of ion transport                                   | GO_BiologicalProcess-EBI-UniProt-GOA-ACAP-ARAP_08.05.2020_00h00 | 0,011685916 | 0,023058603 | 0,013954064 | 0,01655882 | [3, 4, 5, 6]         | Group061 | 6,06  | 10,00 |
| GO:0044070 | regulation of anion transport                                          | GO_BiologicalProcess-EBI-UniProt-GOA-ACAP-ARAP_08.05.2020_00h00 | 0,032775592 | 0,049240567 | 0,013954064 | 0,01655882 | [5, 6]               | Group061 | 6,03  | 7,00  |
| GO:0034248 | regulation of cellular amide metabolic process                         | GO_BiologicalProcess-EBI-UniProt-GOA-ACAP-ARAP_08.05.2020_00h00 | 0,000700788 | 0,00270425  | 0,014053418 | 0,01656628 | [4, 5]               | Group111 | 5,22  | 26,00 |
| GO:0043043 | peptide biosynthetic process                                           | GO_BiologicalProcess-EBI-UniProt-GOA-ACAP-ARAP_08.05.2020_00h00 | 0,013397908 | 0,025694987 | 0,014053418 | 0,01656628 | [5, 6]               | Group111 | 4,06  | 29,00 |
| GO:0006417 | regulation of translation                                              | GO_BiologicalProcess-EBI-UniProt-GOA-ACAP-ARAP_08.05.2020_00h00 | 0,000423629 | 0,001851203 | 0,014053418 | 0,01656628 | [5, 6, 7, 8]         | Group111 | 5,59  | 24,00 |
| GO:0017148 | negative regulation of translation                                     | GO_BiologicalProcess-EBI-UniProt-GOA-ACAP-ARAP_08.05.2020_00h00 | 0,012469945 | 0,024354564 | 0,014053418 | 0,01656628 | [5, 6, 7, 8, 9]      | Group111 | 6,34  | 9,00  |
| GO:0035278 | miRNA mediated inhibition of translation                               | GO_BiologicalProcess-EBI-UniProt-GOA-ACAP-ARAP_08.05.2020_00h00 | 0,005222608 | 0,012340829 | 0,014053418 | 0,01656628 | [6, 7, 8, 9, 10, 11] | Group111 | 21,43 | 3,00  |
| GO:0031099 | regeneration                                                           | GO_BiologicalProcess-EBI-UniProt-GOA-ACAP-ARAP_08.05.2020_00h00 | 0,014252392 | 0,026433215 | 0,014252392 | 0,01658121 | [3]                  | Group000 | 5,41  | 12,00 |
| GO:0044346 | fibroblast apoptotic process                                           | GO_BiologicalProcess-EBI-UniProt-GOA-ACAP-ARAP_08.05.2020_00h00 | 0,014564467 | 0,026855865 | 0,014564467 | 0,01672565 | [5]                  | Group010 | 15,00 | 3,00  |
| GO:0045655 | regulation of monocyte differentiation                                 | GO_BiologicalProcess-EBI-UniProt-GOA-ACAP-ARAP_08.05.2020_00h00 | 0,014564467 | 0,026855865 | 0,014564467 | 0,01672565 | [6, 7, 8, 9, 10, 11] | Group011 | 15,00 | 3,00  |
| GO:1904872 | regulation of telomerase RNA localization to Cajal body                | GO_BiologicalProcess-EBI-UniProt-GOA-ACAP-ARAP_08.05.2020_00h00 | 0,012620698 | 0,024499003 | 0,014564467 | 0,01672565 | [3, 4, 6, 7]         | Group053 | 15,79 | 3,00  |
| GO:0090671 | telomerase RNA localization to Cajal body                              | GO_BiologicalProcess-EBI-UniProt-GOA-ACAP-ARAP_08.05.2020_00h00 | 0,014564467 | 0,026855865 | 0,014564467 | 0,01672565 | [5, 6]               | Group053 | 15,00 | 3,00  |
| GO:0038061 | NIK/NF-kappaB signaling                                                | GO_BiologicalProcess-EBI-UniProt-GOA-ACAP-ARAP_08.05.2020_00h00 | 0,015273142 | 0,027787827 | 0,015273142 | 0,01742705 | [4, 5, 6]            | Group051 | 5,81  | 10,00 |
| GO:1901222 | regulation of NIK/NF-kappaB signaling                                  | GO_BiologicalProcess-EBI-UniProt-GOA-ACAP-ARAP_08.05.2020_00h00 | 0,025498083 | 0,04121903  | 0,015273142 | 0,01742705 | [5, 6, 7]            | Group051 | 6,36  | 7,00  |
| GO:0042698 | ovulation cycle                                                        | GO_BiologicalProcess-EBI-UniProt-GOA-ACAP-ARAP_08.05.2020_00h00 | 0,016363574 | 0,029491413 | 0,016363574 | 0,01855233 | [2, 3, 4]            | Group006 | 7,69  | 6,00  |
| GO:0005080 | protein kinase C binding                                               | GO_MolecularFunction-EBI-UniProt-GOA-ACAP-ARAP_08.05.2020_00h00 | 0,016469596 | 0,029626697 | 0,016469596 | 0,01855435 | [6]                  | Group036 | 8,77  | 5,00  |
| GO:0034162 | toll-like receptor 9 signaling pathway                                 | GO_BiologicalProcess-EBI-UniProt-GOA-ACAP-ARAP_08.05.2020_00h00 | 0,026696119 | 0,042651396 | 0,016469596 | 0,01855435 | [5, 6, 7]            | Group046 | 12,00 | 3,00  |
| GO:0070423 | nucleotide-binding oligomerization domain containing signaling pathway | GO_BiologicalProcess-EBI-UniProt-GOA-ACAP-ARAP_08.05.2020_00h00 | 0,014057252 | 0,026326399 | 0,016469596 | 0,01855435 | [5, 6, 7]            | Group046 | 11,11 | 4,00  |



|            |                                                                  |                                                                 |             |             |             |            |                      |          |       |       |
|------------|------------------------------------------------------------------|-----------------------------------------------------------------|-------------|-------------|-------------|------------|----------------------|----------|-------|-------|
| GO:0071243 | cellular response to arsenic-containing substance                | GO_BiologicalProcess-EBI-UniProt-GOA-ACAP-ARAP_08.05.2020_00h00 | 0,016667997 | 0,029927343 | 0,016667997 | 0,01865977 | [4]                  | Group029 | 14,29 | 3,00  |
| GO:0071349 | cellular response to interleukin-12                              | GO_BiologicalProcess-EBI-UniProt-GOA-ACAP-ARAP_08.05.2020_00h00 | 0,017647753 | 0,031333763 | 0,017647753 | 0,01963312 | [6]                  | Group030 | 8,62  | 5,00  |
| GO:0043243 | positive regulation of protein-containing complex disassembly    | GO_BiologicalProcess-EBI-UniProt-GOA-ACAP-ARAP_08.05.2020_00h00 | 0,018466409 | 0,032485943 | 0,018466409 | 0,02041628 | [4, 5, 6, 7]         | Group007 | 10,26 | 4,00  |
| GO:0030258 | lipid modification                                               | GO_BiologicalProcess-EBI-UniProt-GOA-ACAP-ARAP_08.05.2020_00h00 | 0,027085837 | 0,043130025 | 0,018857107 | 0,02071954 | [4, 5]               | Group104 | 4,56  | 15,00 |
| GO:0071545 | inositol phosphate catabolic process                             | GO_BiologicalProcess-EBI-UniProt-GOA-ACAP-ARAP_08.05.2020_00h00 | 0,001606011 | 0,005140308 | 0,018857107 | 0,02071954 | [5, 6, 7]            | Group104 | 20,00 | 4,00  |
| GO:0046488 | phosphatidylinositol metabolic process                           | GO_BiologicalProcess-EBI-UniProt-GOA-ACAP-ARAP_08.05.2020_00h00 | 0,017771911 | 0,031437557 | 0,018857107 | 0,02071954 | [6, 7]               | Group104 | 5,24  | 12,00 |
| GO:0046856 | phosphatidylinositol dephosphorylation                           | GO_BiologicalProcess-EBI-UniProt-GOA-ACAP-ARAP_08.05.2020_00h00 | 0,007393209 | 0,016265061 | 0,018857107 | 0,02071954 | [6, 7, 8]            | Group104 | 13,33 | 4,00  |
| GO:0052866 | phosphatidylinositol phosphate phosphatase activity              | GO_BiologicalProcess-EBI-UniProt-GOA-ACAP-ARAP_08.05.2020_00h00 | 0,012752683 | 0,024655186 | 0,018857107 | 0,02071954 | [7]                  | Group104 | 11,43 | 4,00  |
| GO:0030545 | receptor regulator activity                                      | GO_BiologicalProcess-EBI-UniProt-GOA-ACAP-ARAP_08.05.2020_00h00 | 0,020130254 | 0,034648661 | 0,020130254 | 0,02184869 | [4]                  | Group056 | 4,11  | 24,00 |
| GO:0030546 | signaling receptor activator activity                            | GO_BiologicalProcess-EBI-UniProt-GOA-ACAP-ARAP_08.05.2020_00h00 | 0,026597006 | 0,042564105 | 0,020130254 | 0,02184869 | [5]                  | Group056 | 4,09  | 22,00 |
| GO:0048015 | phosphatidylinositol-mediated signaling                          | GO_BiologicalProcess-EBI-UniProt-GOA-ACAP-ARAP_08.05.2020_00h00 | 0,020030504 | 0,034664001 | 0,020030504 | 0,0218738  | [5, 6, 7]            | Group016 | 5,34  | 11,00 |
| GO:0048012 | hepatocyte growth factor receptor signaling pathway              | GO_BiologicalProcess-EBI-UniProt-GOA-ACAP-ARAP_08.05.2020_00h00 | 0,021358484 | 0,036113199 | 0,021358484 | 0,02304127 | [6, 7, 8]            | Group015 | 13,04 | 3,00  |
| GO:0046777 | protein autophosphorylation                                      | GO_BiologicalProcess-EBI-UniProt-GOA-ACAP-ARAP_08.05.2020_00h00 | 0,021527739 | 0,036271207 | 0,021527739 | 0,02308396 | [7, 8]               | Group014 | 4,94  | 13,00 |
| GO:0032799 | low-density lipoprotein receptor particle metabolic process      | GO_BiologicalProcess-EBI-UniProt-GOA-ACAP-ARAP_08.05.2020_00h00 | 0,023946417 | 0,03924096  | 0,023946417 | 0,02552373 | [5, 6]               | Group002 | 12,50 | 3,00  |
| GO:0009226 | nucleotide-sugar biosynthetic process                            | GO_BiologicalProcess-EBI-UniProt-GOA-ACAP-ARAP_08.05.2020_00h00 | 0,023946417 | 0,03924096  | 0,023946417 | 0,02552373 | [5, 6, 7]            | Group025 | 12,50 | 3,00  |
| GO:0072574 | hepatocyte proliferation                                         | GO_BiologicalProcess-EBI-UniProt-GOA-ACAP-ARAP_08.05.2020_00h00 | 0,023946417 | 0,03924096  | 0,023946417 | 0,02552373 | [5, 7, 8, 9, 10]     | Group031 | 12,50 | 3,00  |
| GO:0046324 | regulation of glucose import                                     | GO_BiologicalProcess-EBI-UniProt-GOA-ACAP-ARAP_08.05.2020_00h00 | 0,024371797 | 0,039869763 | 0,024371797 | 0,0258225  | [5, 6, 7, 8, 10, 11] | Group013 | 7,94  | 5,00  |
| GO:0051058 | negative regulation of small GTPase mediated signal transduction | GO_BiologicalProcess-EBI-UniProt-GOA-ACAP-ARAP_08.05.2020_00h00 | 0,024371797 | 0,039869763 | 0,024371797 | 0,0258225  | [5, 6, 7, 8]         | Group024 | 7,94  | 5,00  |
| GO:0016579 | protein deubiquitination                                         | GO_BiologicalProcess-EBI-UniProt-GOA-ACAP-ARAP_08.05.2020_00h00 | 0,025704479 | 0,041412771 | 0,025704479 | 0,02707336 | [6, 7, 8, 9]         | Group063 | 4,70  | 14,00 |
| GO:0071108 | protein K48-linked deubiquitination                              | GO_BiologicalProcess-EBI-UniProt-GOA-ACAP-ARAP_08.05.2020_00h00 | 0,003317585 | 0,008674669 | 0,025704479 | 0,02707336 | [7, 8, 9, 10]        | Group063 | 12,82 | 5,00  |
| GO:0061578 | Lys63-specific deubiquitinase activity                           | GO_BiologicalProcess-EBI-UniProt-GOA-ACAP-ARAP_08.05.2020_00h00 | 0,006402782 | 0,014520053 | 0,025704479 | 0,02707336 | [8, 9, 10, 11]       | Group063 | 20,00 | 3,00  |
| GO:0098631 | cell adhesion mediator activity                                  | GO_BiologicalProcess-EBI-UniProt-GOA-ACAP-ARAP_08.05.2020_00h00 | 0,025888894 | 0,041569918 | 0,025888894 | 0,02710719 | [3]                  | Group032 | 7,81  | 5,00  |
| GO:1900034 | regulation of cellular response to heat                          | GO_BiologicalProcess-EBI-UniProt-GOA-ACAP-ARAP_08.05.2020_00h00 | 0,026506023 | 0,042489555 | 0,026506023 | 0,02759106 | [4, 5, 6]            | Group033 | 6,90  | 6,00  |

|            |                                                                     |                                                                 |             |             |             |            |                    |          |       |      |
|------------|---------------------------------------------------------------------|-----------------------------------------------------------------|-------------|-------------|-------------|------------|--------------------|----------|-------|------|
| GO:0032469 | endoplasmic reticulum calcium ion homeostasis                       | GO_BiologicalProcess-EBI-UniProt-GOA-ACAP-ARAP_08.05.2020_00h00 | 0,026696119 | 0,042651396 | 0,026696119 | 0,02762738 | [8, 10]            | Group001 | 12,00 | 3,00 |
| GO:0032967 | positive regulation of collagen biosynthetic process                | GO_BiologicalProcess-EBI-UniProt-GOA-ACAP-ARAP_08.05.2020_00h00 | 0,026696119 | 0,042651396 | 0,026696119 | 0,02762738 | [4, 5, 6]          | Group003 | 12,00 | 3,00 |
| GO:0048305 | immunoglobulin secretion                                            | GO_BiologicalProcess-EBI-UniProt-GOA-ACAP-ARAP_08.05.2020_00h00 | 0,026696119 | 0,042651396 | 0,026696119 | 0,02762738 | [4, 5, 6, 7, 8, 9] | Group019 | 12,00 | 3,00 |
| GO:0016780 | phosphotransferase activity, for other substituted phosphate groups | GO_MolecularFunction-EBI-UniProt-GOA-ACAP-ARAP_08.05.2020_00h00 | 0,026696119 | 0,042651396 | 0,026696119 | 0,02762738 | [4]                | Group039 | 12,00 | 3,00 |
| GO:0045807 | positive regulation of endocytosis                                  | GO_BiologicalProcess-EBI-UniProt-GOA-ACAP-ARAP_08.05.2020_00h00 | 0,028982626 | 0,045320872 | 0,028982626 | 0,02982027 | [3, 4, 5, 6, 7]    | Group012 | 6,19  | 7,00 |
| GO:0002029 | desensitization of G protein-coupled receptor signaling pathway     | GO_BiologicalProcess-EBI-UniProt-GOA-ACAP-ARAP_08.05.2020_00h00 | 0,029607117 | 0,045996774 | 0,029607117 | 0,03028774 | [5, 6, 7, 8]       | Group008 | 11,54 | 3,00 |
| GO:0007617 | mating behavior                                                     | GO_BiologicalProcess-EBI-UniProt-GOA-ACAP-ARAP_08.05.2020_00h00 | 0,029607117 | 0,045996774 | 0,029607117 | 0,03028774 | [3, 4, 5, 6]       | Group009 | 11,54 | 3,00 |
| GO:0007040 | lysosome organization                                               | GO_BiologicalProcess-EBI-UniProt-GOA-ACAP-ARAP_08.05.2020_00h00 | 0,030797191 | 0,047081329 | 0,030797191 | 0,03114716 | [7]                | Group043 | 7,46  | 5,00 |
| GO:0051453 | regulation of intracellular pH                                      | GO_BiologicalProcess-EBI-UniProt-GOA-ACAP-ARAP_08.05.2020_00h00 | 0,030644687 | 0,046923146 | 0,030644687 | 0,03117002 | [8, 10]            | Group026 | 6,67  | 6,00 |
| GO:0035270 | endocrine system development                                        | GO_BiologicalProcess-EBI-UniProt-GOA-ACAP-ARAP_08.05.2020_00h00 | 0,032142218 | 0,048748184 | 0,032142218 | 0,03232381 | [4, 5]             | Group005 | 5,67  | 8,00 |
| GO:0072527 | pyrimidine-containing compound metabolic process                    | GO_BiologicalProcess-EBI-UniProt-GOA-ACAP-ARAP_08.05.2020_00h00 | 0,023341313 | 0,038579684 | 0,034110095 | 0,0341101  | [4]                | Group108 | 6,48  | 7,00 |
| GO:0072528 | pyrimidine-containing compound biosynthetic process                 | GO_BiologicalProcess-EBI-UniProt-GOA-ACAP-ARAP_08.05.2020_00h00 | 0,02291313  | 0,038135417 | 0,034110095 | 0,0341101  | [5]                | Group108 | 8,06  | 5,00 |
| GO:0006220 | pyrimidine nucleotide metabolic process                             | GO_BiologicalProcess-EBI-UniProt-GOA-ACAP-ARAP_08.05.2020_00h00 | 0,030797191 | 0,047081329 | 0,034110095 | 0,0341101  | [5, 6, 7, 8]       | Group108 | 7,46  | 5,00 |
| GO:0003841 | 1-acylglycerol-3-phosphate O-acyltransferase activity               | GO_MolecularFunction-EBI-UniProt-GOA-ACAP-ARAP_08.05.2020_00h00 | 0,007729088 | 0,016887529 | 0,034110095 | 0,0341101  | [7]                | Group108 | 18,75 | 3,00 |
| GO:0016024 | CDP-diacylglycerol biosynthetic process                             | GO_BiologicalProcess-EBI-UniProt-GOA-ACAP-ARAP_08.05.2020_00h00 | 0,005222608 | 0,012340829 | 0,034110095 | 0,0341101  | [6, 7, 8, 9, 10]   | Group108 | 21,43 | 3,00 |
