# Supplementary material for: Analysis of the Role of FRMD5 in the Biology of Papillary Thyroid Carcinoma
Source: MDPI journal article supplement (doi:10.3390/ijms22136726), 2021-06-23
Supplement: s1 [file s1]

Supplementary Table S1. Genes upregulated in TPC1 siFRMD5 (in comparison with TPC1 siNEG).

| gene      | TPC1 siNEG 1 | TPC1 siNEG 2 | TPC1 siNEG 3 | TPC1 siFRMD5 1 | TPC1 siFRMD5 2 | TPC1 siFRMD5 3 | baseMean    | log2FoldChange | lfcSE       | stat        | pvalue      | padj        | Fold-change |
|-----------|--------------|--------------|--------------|----------------|----------------|----------------|-------------|----------------|-------------|-------------|-------------|-------------|-------------|
| ANXA2     | 6946,955331  | 7694,709845  | 8070,733485  | 29182,39744    | 33450,37831    | 26534,48526    | 14085,86744 | 1,972926093    | 0,150180308 | 13,13704922 | 2,01949E-39 | 2,2687E-35  | 3,925635146 |
| GALNT7    | 708,025101   | 706,0935042  | 777,030009   | 1690,146684    | 1758,420035    | 1630,501492    | 767,8733723 | 1,212479562    | 0,126807172 | 9,561600852 | 1,15949E-21 | 3,25643E-18 | 2,317355789 |
| CD2AP     | 1322,570115  | 1334,608765  | 1260,454654  | 3093,99094     | 3511,229285    | 3899,503942    | 1672,570136 | 1,423040004    | 0,155165371 | 9,171118498 | 4,68136E-20 | 8,76507E-17 | 2,681499536 |
| CLDN12    | 95,2111994   | 92,04198379  | 84,66759324  | 380,1326349    | 374,8004414    | 311,9113881    | 228,1662748 | 1,974563893    | 0,220890625 | 8,939102276 | 3,92345E-19 | 5,5095E-16  | 3,930094199 |
| SETD7     | 311,6002889  | 327,4064852  | 333,2079476  | 891,3869699    | 862,9387407    | 941,8500739    | 640,8412132 | 1,470453403    | 0,165643797 | 8,877201724 | 6,85634E-19 | 7,00219E-16 | 2,771089685 |
| ZC3HAV1L  | 19,04223988  | 34,18702255  | 39,60258394  | 253,8227404    | 221,064931     | 194,4859243    | 67,82308783 | 2,827712671    | 0,318485559 | 8,878621297 | 6,76942E-19 | 7,00219E-16 | 7,099476615 |
| TFPI      | 765,1518206  | 845,4713654  | 786,5892534  | 1746,685399    | 1949,186726    | 2206,620173    | 1128,357036 | 1,299320433    | 0,156997439 | 8,276061331 | 1,27316E-16 | 1,19189E-13 | 2,461129263 |
| RBM8A     | 1718,994927  | 1857,933187  | 1928,236156  | 3985,37791     | 4674,906104    | 5659,662717    | 2818,5264   | 1,378865323    | 0,174774328 | 7,889404229 | 3,03633E-15 | 2,49807E-12 | 2,60063751  |
| UBE2V2    | 971,1542339  | 1376,6851    | 1104,775531  | 2875,05379     | 3239,667288    | 2621,278842    | 1853,02205  | 1,338058467    | 0,169669033 | 7,886285709 | 3,11313E-15 | 2,49807E-12 | 2,52810865  |
| ELL2      | 955,5742194  | 1268,864491  | 998,2582365  | 2408,308656    | 2383,461489    | 2681,214756    | 1441,608305 | 1,212180857    | 0,159131675 | 7,61747062  | 2,58695E-14 | 1,93745E-11 | 2,316876039 |
| LCLAT1    | 128,102341   | 207,7519063  | 118,8077518  | 522,0808973    | 528,5359517    | 563,8868624    | 356,9871129 | 1,822939895    | 0,239748429 | 7,603553035 | 2,88109E-14 | 2,02289E-11 | 3,538014338 |
| ITGB8     | 31,16002889  | 35,50190803  | 73,7427425   | 161,1954844    | 209,8433609    | 218,9495626    | 435,496939  | 2,055611686    | 0,273269254 | 7,522294052 | 5,38234E-14 | 3,55677E-11 | 4,157198643 |
| PAWR      | 79,63118495  | 173,5648837  | 196,6473133  | 537,7192652    | 574,5443892    | 606,6982294    | 371,984813  | 1,923169504    | 0,257132885 | 7,479282564 | 7,47294E-14 | 4,66395E-11 | 3,792553426 |
| AR5J      | 58,85783236  | 77,57824348  | 83,3019869   | 246,6050322    | 219,942774     | 324,1432072    | 268,4491754 | 1,837469043    | 0,248701589 | 7,388248104 | 1,48776E-13 | 8,35674E-11 | 3,573825128 |
| CAV2      | 1355,461257  | 1425,335863  | 1384,724831  | 3405,555347    | 4233,898399    | 5189,960862    | 1958,901565 | 1,622776265    | 0,225265871 | 7,203826546 | 5,85458E-13 | 3,0574E-10  | 3,07967106  |
| HMG2A     | 2560,315707  | 1806,652653  | 1410,671352  | 4983,827552    | 6710,49892     | 6599,066427    | 4877,473187 | 1,663579024    | 0,231032625 | 7,200623828 | 5,99377E-13 | 3,0574E-10  | 3,168014687 |
| PLAC8     | 62,32005779  | 85,46755638  | 106,5172947  | 334,4204826    | 309,7153348    | 286,2245679    | 100,2905725 | 1,861754148    | 0,26003188  | 7,159714974 | 8,0845E-13  | 3,78422E-10 | 3,634493054 |
| CXADR     | 110,7912138  | 180,1393111  | 147,485485   | 433,0624955    | 526,2916377    | 599,3591379    | 166,5607224 | 1,82365635     | 0,256813979 | 7,101078995 | 1,23787E-12 | 5,34853E-10 | 3,539771784 |
| EIF4EBP2  | 941,7253177  | 1033,499989  | 1051,516884  | 2411,91751     | 2622,480933    | 3647,528468    | 1541,989431 | 1,519835738    | 0,217653066 | 6,982836349 | 2,89279E-12 | 1,08325E-09 | 2,86758398  |
| AKIRIN1   | 536,6449421  | 394,4656448  | 419,2411472  | 1065,814919    | 1336,488999    | 1283,117828    | 1007,416904 | 1,450996674    | 0,211981411 | 6,844924122 | 7,65164E-12 | 2,6048E-09  | 2,7339686   |
| PLAGL1    | 320,2558525  | 287,9599207  | 241,7123226  | 637,5642295    | 879,7710959    | 917,3864356    | 285,1056414 | 1,520439463    | 0,226244213 | 6,720346318 | 1,81293E-11 | 5,81899E-09 | 2,868784231 |
| APOL1     | 467,4004334  | 595,6431237  | 487,5214643  | 976,7965176    | 1158,066034    | 1051,936446    | 522,763663  | 1,037394835    | 0,15658831  | 6,62498262  | 3,47289E-11 | 1,08373E-08 | 2,052517944 |
| MAMDC2    | 67,51339594  | 139,3778612  | 143,388666   | 421,0329817    | 356,8459292    | 512,513222     | 196,6026473 | 1,870401448    | 0,283428052 | 6,59921076  | 4,13352E-11 | 1,20075E-08 | 3,656343084 |
| PON2      | 167,9179335  | 165,6755708  | 234,8842909  | 455,9185716    | 504,9706545    | 519,8523135    | 243,0489077 | 1,378774695    | 0,215024648 | 6,412170463 | 1,43462E-10 | 3,74804E-08 | 2,600474147 |
| PIK3R1    | 72,70673409  | 142,0076321  | 195,281707   | 446,2949606    | 393,8771105    | 458,6932178    | 334,3870225 | 1,652107741    | 0,259168255 | 6,374653181 | 1,83377E-10 | 4,57792E-08 | 3,142924772 |
| ZNF652    | 173,1112716  | 156,4713724  | 185,7224626  | 359,6824615    | 449,984961     | 371,8473019    | 262,1077073 | 1,198529255    | 0,190493025 | 6,291722519 | 3,13962E-10 | 7,34803E-08 | 2,29505584  |
| DCP2      | 200,8090751  | 222,2156466  | 262,1964178  | 981,6083231    | 1037,955234    | 627,4923219    | 485,860211  | 1,948705863    | 0,312018443 | 6,245482944 | 4,22493E-10 | 9,68629E-08 | 3,860280983 |
| RECK      | 19,04223988  | 32,87213707  | 20,48409514  | 134,7305542    | 112,215701     | 133,3268286    | 48,56974882 | 2,378575031    | 0,383187006 | 6,207347837 | 5,38862E-10 | 1,21072E-07 | 5,200228551 |
| CPOX      | 76,16895952  | 61,79961769  | 75,10834885  | 203,2987826    | 164,9570805    | 232,4045637    | 140,3782916 | 1,498371029    | 0,243669241 | 6,149200543 | 7,78745E-10 | 1,65064E-07 | 2,825235302 |
| UHMK1     | 292,5580491  | 311,6278594  | 397,3914457  | 773,497735     | 819,1746174    | 978,5455313    | 541,1150542 | 1,358467066    | 0,221680698 | 6,128034946 | 8,8971E-10  | 1,85093E-07 | 2,564125838 |
| YOD1      | 228,5068786  | 152,526716   | 120,1733582  | 485,9923561    | 471,3059442    | 642,1705049    | 295,7553129 | 1,680667134    | 0,276516626 | 6,077996675 | 1,21693E-09 | 2,2785E-07  | 3,205761582 |
| DENND1B   | 115,984552   | 111,765266   | 116,0765391  | 239,3873239    | 249,1188562    | 300,9027509    | 124,5372784 | 1,199265375    | 0,198901817 | 6,029433979 | 1,64535E-09 | 2,98127E-07 | 2,296227165 |
| GFRA1     | 344,4914306  | 273,4961804  | 262,1964178  | 698,9147497    | 687,8822472    | 634,8314134    | 241,8177033 | 1,203290078    | 0,199841032 | 6,021236312 | 1,7309E-09  | 3,08649E-07 | 2,30264192  |
| C12orf73  | 27,69780346  | 34,18702255  | 28,6777332   | 117,8892349    | 86,40608978    | 97,85455313    | 112,7878032 | 1,72985506     | 0,289088211 | 5,98383122  | 2,17949E-09 | 3,70976E-07 | 3,316944929 |
| TMEM237   | 110,7912138  | 166,9904563  | 203,4753451  | 441,4831551    | 453,3514321    | 527,191405     | 363,4072375 | 1,556533748    | 0,261474856 | 5,952900287 | 2,63432E-09 | 4,417E-07   | 2,941462713 |
| GALNT1    | 406,8114883  | 344,4999965  | 438,359636   | 868,5308937    | 717,0583294    | 980,9918951    | 516,2749932 | 1,109653601    | 0,186560544 | 5,947954361 | 2,71514E-09 | 4,48558E-07 | 2,157938279 |
| DPY19L3   | 143,6823555  | 190,658395   | 191,184888   | 446,2949606    | 379,2890694    | 549,2086794    | 219,7371262 | 1,382356803    | 0,2325238   | 5,945012095 | 2,76436E-09 | 4,48571E-07 | 2,60693896  |
| RASA2     | 76,16895952  | 69,68893058  | 91,49562496  | 242,996178     | 198,6217908    | 214,056835     | 152,1862722 | 1,464739826    | 0,247877477 | 5,909128345 | 3,43923E-09 | 5,36615E-07 | 2,760136901 |
| MT1E      | 2742,082543  | 2435,167914  | 1996,516473  | 4667,45134     | 4638,130975    | 5050,158123    | 2098,755644 | 0,981112207    | 0,166662479 | 5,886821152 | 3,93694E-09 | 6,05858E-07 | 1,973986614 |
| CRNKL1    | 3,462225433  | 36,81679352  | 46,43061565  | 159,9925331    | 125,6815851    | 121,0950095    | 97,86538189 | 2,186962833    | 0,371736607 | 5,883097849 | 4,02658E-09 | 6,11278E-07 | 4,553458807 |
| EIF5A2    | 160,9934826  | 165,6755708  | 170,7007928  | 359,6824615    | 295,1272936    | 402,4268497    | 231,7421017 | 1,085858965    | 0,186204554 | 5,831538181 | 5,49187E-09 | 7,90971E-07 | 2,122638903 |
| NUFIP2    | 493,3671242  | 704,7786187  | 736,0618187  | 1441,135749    | 1159,188191    | 1546,101939    | 771,4501338 | 1,09735936     | 0,188096318 | 5,834028935 | 5,41047E-09 | 7,90971E-07 | 2,139627067 |
| GCC2      | 207,733526   | 282,7003788  | 288,1429383  | 467,9480854    | 507,2149686    | 514,9595858    | 432,9467502 | 0,929637201    | 0,159759471 | 5,818980211 | 5,92077E-09 | 8,41949E-07 | 1,90479693  |
| ARL5B     | 259,6669075  | 376,0572481  | 375,5417442  | 720,5678745    | 738,3793126    | 622,5995943    | 434,1035868 | 1,036683207    | 0,180963612 | 5,728683208 | 1,01213E-08 | 1,33768E-06 | 2,051505763 |
| PTHF2     | 126,3712283  | 149,896945   | 222,5938339  | 440,2802038    | 438,7633909    | 669,080507     | 230,1930142 | 1,629715292    | 0,285037971 | 5,717537505 | 1,08079E-08 | 1,39558E-06 | 3,094519239 |
| FAM46A    | 131,5645664  | 153,8416015  | 137,9262406  | 295,9260386    | 366,9453423    | 270,323203     | 237,5979604 | 1,138380488    | 0,199317412 | 5,711395097 | 1,12054E-08 | 1,4144E-06  | 2,20133771  |
| ANXA3     | 759,9584825  | 976,9599137  | 801,6109231  | 1692,552587    | 1500,323922    | 1604,814671    | 897,5267277 | 0,916945911    | 0,161567626 | 5,675307192 | 1,3844E-08  | 1,70905E-06 | 1,888114049 |
| HIST1H2BI | 704,5628756  | 749,4847251  | 651,3942254  | 1211,372036    | 1522,767063    | 1341,83056     | 738,6246163 | 0,953131866    | 0,167910718 | 5,676420629 | 1,37542E-08 | 1,70905E-06 | 1,936071007 |

|          |             |             |             |             |             |             |             |             |             |             |             |             |             |
|----------|-------------|-------------|-------------|-------------|-------------|-------------|-------------|-------------|-------------|-------------|-------------|-------------|-------------|
| RP2      | 377,3825722 | 355,0190803 | 344,1327983 | 624,3317643 | 647,4845948 | 775,4973336 | 418,5405529 | 0,928316769 | 0,163650398 | 5,672560395 | 1,40679E-08 | 1,71781E-06 | 1,903054355 |
| C4orf29  | 77,90007224 | 90,72709831 | 80,57077422 | 190,0663175 | 206,4768899 | 161,4600127 | 140,7596026 | 1,159942039 | 0,206026552 | 5,63006092  | 1,80146E-08 | 2,15294E-06 | 2,234484503 |
| SAA1     | 22,7733526  | 26,29770965 | 42,33379662 | 97,43906149 | 176,1245466 | 171,2454685 | 142,9164855 | 2,304157252 | 0,413117482 | 5,577486676 | 2,44018E-08 | 2,88558E-06 | 4,93878872  |
| JAK1     | 858,6319073 | 940,1431201 | 1003,720662 | 1599,925331 | 2025,493403 | 1681,875132 | 1943,063852 | 0,920689647 | 0,165681678 | 5,556979242 | 2,74483E-08 | 3,21203E-06 | 1,893019991 |
| ZMYM2    | 154,0690318 | 206,4370208 | 281,3149066 | 476,368745  | 471,3059442 | 477,0409465 | 286,5131198 | 1,143737637 | 0,206372469 | 5,542103757 | 2,98859E-08 | 3,46122E-06 | 2,209527117 |
| FOXE1    | 138,4890173 | 178,8244256 | 143,388666  | 288,7083303 | 454,4735891 | 340,0445721 | 365,0168686 | 1,23083353  | 0,222963524 | 5,520335834 | 3,38352E-08 | 3,87862E-06 | 2,347025521 |
| MTMR9    | 53,66449421 | 77,57824348 | 57,35546639 | 155,1807276 | 171,6900225 | 173,6918318 | 126,2017616 | 1,399511862 | 0,254545141 | 5,498089092 | 3,83929E-08 | 4,35662E-06 | 2,638123058 |
| OPTN     | 517,6027022 | 564,0858721 | 633,641343  | 970,7817607 | 1035,75092  | 1010,348261 | 532,922359  | 0,812953321 | 0,148340224 | 5,480329605 | 4,24534E-08 | 4,76922E-06 | 1,756804094 |
| PGM2L1   | 69,24450865 | 60,4847322  | 64,1834981  | 192,4722202 | 161,5906095 | 187,1468329 | 76,85184834 | 1,483702635 | 0,271872769 | 5,457341829 | 4,83315E-08 | 5,37581E-06 | 2,796655667 |
| OAT      | 685,5206357 | 821,8034267 | 690,9968094 | 1260,693042 | 1439,727444 | 1752,819683 | 857,4109048 | 1,017625095 | 0,18752953  | 5,4264792   | 5,74765E-08 | 6,20857E-06 | 2,024583429 |
| RUFY2    | 167,9179335 | 170,9351128 | 210,3033768 | 387,3503432 | 331,036318  | 451,3541263 | 245,7170272 | 1,088050827 | 0,201491802 | 5,399975663 | 6,66499E-08 | 7,06364E-06 | 2,125866243 |
| KRT7     | 112,5223266 | 61,79961769 | 69,64592348 | 205,7046854 | 209,8433609 | 272,7695669 | 3083,894417 | 1,51007438  | 0,280171218 | 5,389826947 | 7,05256E-08 | 7,40453E-06 | 2,848247233 |
| NFIB     | 417,1981646 | 550,9370173 | 487,5214643 | 946,7227332 | 890,992666  | 1067,837811 | 369,0885854 | 0,994749541 | 0,185539627 | 5,361385907 | 8,25859E-08 | 8,51165E-06 | 1,992734547 |
| UBE2B    | 341,0292051 | 370,7977061 | 447,9188804 | 694,1029442 | 839,3734435 | 851,3346122 | 736,6131915 | 1,038371024 | 0,194226229 | 5,34619361  | 8,98231E-08 | 9,17339E-06 | 2,053907236 |
| MYLK     | 334,1047543 | 261,6622111 | 223,9594402 | 487,1953074 | 694,6151892 | 687,4282357 | 427,088995  | 1,19325259  | 0,22357921  | 5,337046265 | 9,44729E-08 | 9,47597E-06 | 2,286676992 |
| NIPAL3   | 254,4735693 | 372,1125916 | 255,3683861 | 535,3133675 | 637,3851817 | 618,9300485 | 349,9593231 | 1,019011339 | 0,223303624 | 5,332244965 | 9,7006E-08  | 9,64394E-06 | 2,026529728 |
| BRWD1    | 604,158338  | 525,9541931 | 501,1775278 | 855,2984286 | 912,3136492 | 954,081893  | 652,6718832 | 0,740983344 | 0,139044575 | 5,329106472 | 9,86971E-08 | 9,68591E-06 | 1,671314622 |
| GNPNAT1  | 1088,869899 | 1150,524797 | 1103,409925 | 2549,053967 | 3016,358043 | 1932,627424 | 1579,318414 | 1,165451563 | 0,219509481 | 5,309344985 | 1,1002E-07  | 1,04743E-05 | 2,243034115 |
| LEPREL1  | 36,35336704 | 31,55725159 | 58,72107273 | 121,498089  | 138,0253122 | 181,0309233 | 75,92420072 | 1,794076211 | 0,338678293 | 5,29728728  | 1,17536E-07 | 1,09124E-05 | 3,467933444 |
| CCNT2    | 121,1778901 | 181,4541966 | 187,0880689 | 374,1178781 | 449,984961  | 514,9595858 | 242,4250094 | 1,446089598 | 0,273555361 | 5,286277672 | 1,2483E-07  | 1,13605E-05 | 2,724685279 |
| KCNJ16   | 39,81559248 | 48,65076286 | 75,10834885 | 162,3984358 | 180,6672786 | 172,4686499 | 56,66724539 | 1,646553121 | 0,311612347 | 5,283979073 | 1,26408E-07 | 1,13605E-05 | 3,130847245 |
| TULP3    | 406,8114883 | 495,711827  | 439,7252423 | 1011,682108 | 1026,773664 | 1283,117828 | 676,2442686 | 1,306207975 | 0,24715953  | 5,284878052 | 1,25789E-07 | 1,13605E-05 | 2,472906983 |
| COL12A1  | 574,7294218 | 594,3282382 | 660,9534698 | 1004,464399 | 1071,659945 | 1049,490082 | 1507,889938 | 0,771409012 | 0,147033585 | 5,246481681 | 1,55031E-07 | 1,33971E-05 | 1,706936053 |
| INPP5A   | 154,0690318 | 169,6202273 | 154,3135167 | 413,8152735 | 374,8004414 | 281,3318402 | 233,2916555 | 1,161614531 | 0,223380219 | 5,200167383 | 1,99109E-07 | 1,65688E-05 | 2,237076405 |
| PLS3     | 3891,541386 | 3640,917902 | 4176,024196 | 5709,207232 | 6017,005888 | 5755,070906 | 3572,68714  | 0,578316458 | 0,111194967 | 5,200922967 | 1,98301E-07 | 1,65688E-05 | 1,493105863 |
| TBC1D5   | 152,337919  | 173,5648837 | 222,5938339 | 319,9850661 | 394,9992675 | 421,9977604 | 265,9201753 | 1,0470565   | 0,202079377 | 5,181411968 | 2,20213E-07 | 1,81902E-05 | 2,066309697 |
| TRAPPC11 | 20,7733526  | 27,61259514 | 54,62425371 | 108,2656239 | 100,9941309 | 117,4254638 | 60,59173348 | 1,645006942 | 0,318447832 | 5,165703074 | 2,39537E-07 | 1,9642E-05  | 3,127493622 |
| TDG      | 302,9447254 | 326,0915997 | 345,4984047 | 556,9664873 | 644,1181238 | 672,4781151 | 497,4781151 | 0,905602846 | 0,176188407 | 5,139968413 | 2,74785E-07 | 2,23691E-05 | 2,727327122 |
| KRT80    | 406,8114883 | 326,0915997 | 181,6256436 | 661,623257  | 738,3793126 | 867,2359771 | 1147,395958 | 1,313564506 | 0,256290881 | 5,125287728 | 2,97084E-07 | 2,38388E-05 | 2,485548934 |
| SSH2     | 261,3980202 | 330,0362562 | 344,1327983 | 607,4904451 | 737,2571556 | 968,760076  | 363,5880476 | 1,304091844 | 0,254866013 | 5,116774205 | 3,10805E-07 | 2,44167E-05 | 2,469282406 |
| ARRDC3   | 38,08447976 | 53,91030479 | 62,81789176 | 105,8597211 | 159,3462954 | 144,3354659 | 93,65473635 | 1,390891768 | 0,272577041 | 5,102747329 | 3,34758E-07 | 2,57371E-05 | 2,622407286 |
| SPP1     | 855,1696819 | 710,0381607 | 868,5256339 | 1648,043386 | 2088,334196 | 1791,961504 | 676,0097717 | 1,184144519 | 0,232111953 | 5,101609398 | 3,36777E-07 | 2,57371E-05 | 2,272286139 |
| PLCB4    | 114,2534393 | 234,0496159 | 279,9493002 | 591,8520772 | 401,7322096 | 618,9300485 | 682,8397405 | 1,352396769 | 0,269493545 | 5,018290017 | 5,21334E-07 | 3,82789E-05 | 2,553359664 |
| TOP2A    | 1919,804002 | 2049,906468 | 2184,970148 | 2962,86924  | 3153,261198 | 3141,131155 | 2641,827977 | 0,588386612 | 0,11764761  | 5,001262758 | 5,6956E-07  | 4,10156E-05 | 1,503564348 |
| OSTM1    | 115,984552  | 265,6068675 | 234,8842909 | 513,6602377 | 504,9706545 | 570,002772  | 306,0912466 | 1,358450647 | 0,272981516 | 4,976346622 | 6,47956E-07 | 4,54306E-05 | 2,564096656 |
| TNFRSF19 | 12,11778901 | 22,35305321 | 25,94652051 | 60,14756882 | 74,06236266 | 75,83727868 | 33,06520219 | 1,77035699  | 0,357852044 | 4,947175852 | 7,52979E-07 | 5,18955E-05 | 3,411383597 |
| CYP51A1  | 761,6895952 | 816,5438848 | 970,9461096 | 1373,770472 | 1577,752756 | 1522,861483 | 920,1379684 | 0,810717007 | 0,163945316 | 4,945045254 | 7,61262E-07 | 5,21464E-05 | 1,75408299  |
| AOX1     | 844,7830056 | 752,1144961 | 680,0719586 | 1254,678286 | 1273,648206 | 1641,510129 | 600,2844388 | 0,873849324 | 0,176915327 | 4,939364725 | 7,83775E-07 | 5,33632E-05 | 1,832545887 |
| ATP6V1B2 | 1345,074581 | 1719,870211 | 1988,322835 | 3097,599794 | 2935,562738 | 3454,265726 | 1855,248974 | 0,907890209 | 0,183929548 | 4,93607589  | 7,97101E-07 | 5,39436E-05 | 1,876299599 |
| CSNK1A1  | 2236,59763  | 2365,478983 | 2590,555232 | 3750,802392 | 4135,148582 | 4317,832157 | 4353,800378 | 0,762463898 | 0,154752185 | 4,926999231 | 8,35021E-07 | 5,5837E-05  | 1,696385313 |
| ARHGEF28 | 268,322471  | 256,4026691 | 247,174748  | 449,9038148 | 494,8712414 | 640,947323  | 571,5414026 | 1,039231242 | 0,211105216 | 4,922811757 | 8,53095E-07 | 5,67081E-05 | 2,055132258 |
| DKK1     | 27,69780346 | 42,07633545 | 20,48409514 | 87,81545048 | 85,28393277 | 101,5240989 | 200,8479562 | 1,596399459 | 0,327547621 | 4,873793482 | 1,09475E-06 | 7,02928E-05 | 3,023877003 |
| EPDR1    | 458,7448698 | 487,8225141 | 427,4347853 | 917,8519002 | 1123,279167 | 1305,135102 | 394,7430064 | 1,284086147 | 0,263469899 | 4,873748958 | 1,095E-06   | 7,02928E-05 | 2,435277449 |
| SAMD4A   | 96,94231212 | 103,8759531 | 95,59244399 | 223,748956  | 265,9512114 | 362,0618466 | 136,0112418 | 1,52196723  | 0,312247866 | 4,874227812 | 1,09235E-06 | 7,02928E-05 | 2,871823789 |
| LIPA     | 316,7936271 | 297,1641191 | 387,8322013 | 696,5088469 | 684,5157761 | 764,4886963 | 531,9532656 | 1,09816605  | 0,225818991 | 4,863036734 | 1,15598E-06 | 7,30279E-05 | 2,140823786 |
| SERINC2  | 2420,095577 | 2270,807229 | 1868,149477 | 3810,94996  | 3855,731487 | 3459,158453 | 1994,464184 | 0,762840933 | 0,157146728 | 4,854322715 | 1,20799E-06 | 7,58131E-05 | 1,696828706 |
| PPP1CC   | 2392,397774 | 2537,728982 | 2429,413684 | 3827,79128  | 4672,66179  | 5652,323625 | 3604,543207 | 0,943303039 | 0,195084029 | 4,835367846 | 1,329E-06   | 8,20327E-05 | 1,922925727 |
| TROVE2   | 212,9268641 | 380,0019045 | 296,3365764 | 803,5715194 | 766,4332379 | 611,5909571 | 422,884233  | 1,291268222 | 0,267784826 | 4,822036573 | 1,421E-06   | 8,72322E-05 | 2,44743106  |
| ZNF92    | 41,54670519 | 73,63358703 | 58,72107273 | 139,5423597 | 139,1474692 | 156,567285  | 82,55688143 | 1,308148918 | 0,271495771 | 4,818303114 | 1,44784E-06 | 8,79193E-05 | 2,476236171 |
| CBL      | 235,4313294 | 390,5209884 | 412,4131155 | 671,246868  | 651,9732229 | 670,3036889 | 448,8395984 | 0,935037785 | 0,194134472 | 4,816443844 | 1,46139E-06 | 8,8265E-05  | 1,911940709 |

|           |             |             |             |             |             |             |             |             |             |             |             |             |             |
|-----------|-------------|-------------|-------------|-------------|-------------|-------------|-------------|-------------|-------------|-------------|-------------|-------------|-------------|
| FDF1      | 758,2273698 | 811,2843428 | 798,8797105 | 1322,043563 | 1402,696263 | 1224,405096 | 904,4555628 | 0,737232848 | 0,15343435  | 4,804874833 | 1,54848E-06 | 9,20405E-05 | 1,666975439 |
| KLHL28    | 32,89114161 | 31,55725159 | 50,52743468 | 86,6124991  | 102,1162879 | 116,2022818 | 68,39741516 | 1,400371503 | 0,292290338 | 4,791029059 | 1,65928E-06 | 9,65822E-05 | 2,639695472 |
| PPWD1     | 230,2379913 | 327,4064852 | 349,5952237 | 540,125168  | 530,7802658 | 533,3073146 | 489,5334112 | 0,815922066 | 0,197399032 | 4,788302248 | 1,68198E-06 | 9,73989E-05 | 1,760422927 |
| ATP10A    | 109,0601011 | 67,05915962 | 90,13001862 | 197,2840257 | 215,4541459 | 283,7782041 | 80,23047126 | 1,394640315 | 0,292551167 | 4,767167152 | 1,86834E-06 | 0,000106543 | 2,629229933 |
| ARL6IP1   | 1165,038858 | 2247,13929  | 2288,75623  | 4047,931382 | 4472,917842 | 3833,452119 | 2242,510623 | 1,114813373 | 0,234400118 | 4,756027362 | 1,9744E-06  | 0,000111459 | 2,165669922 |
| ANKRD13C  | 242,3557803 | 344,4999965 | 284,0461193 | 505,2395781 | 628,4079256 | 530,8609507 | 482,8766939 | 0,930995968 | 0,196266104 | 4,743557595 | 2,09997E-06 | 0,000117369 | 1,90659652  |
| UCA1      | 254,4735693 | 245,8835853 | 184,3568563 | 394,5680515 | 350,1129871 | 418,3282146 | 713,401105  | 0,767342009 | 0,162266314 | 4,728905173 | 2,25734E-06 | 0,000125539 | 1,702130923 |
| ATPIF1    | 503,7538005 | 583,8091543 | 640,4693747 | 882,9663103 | 990,8646399 | 995,6700781 | 1233,333587 | 0,729595558 | 0,154566557 | 4,720267903 | 2,35534E-06 | 0,000129705 | 1,658174177 |
| SGTB      | 133,2956792 | 101,2461822 | 94,22683764 | 228,5607615 | 189,6445347 | 313,13457   | 173,4620429 | 1,15973871  | 0,245776122 | 4,718679344 | 2,37381E-06 | 0,000130085 | 2,234169604 |
| C10orf12  | 271,7846965 | 347,1297674 | 249,9059607 | 558,1694386 | 572,3000751 | 455,0236721 | 381,2038481 | 0,866099031 | 0,184201354 | 4,701914567 | 2,57733E-06 | 0,000139201 | 1,822727674 |
| KCNIP1    | 287,3647109 | 322,1469433 | 344,1327983 | 771,0918323 | 686,7600902 | 519,8523135 | 244,4974996 | 1,051040907 | 0,223754471 | 4,697295658 | 2,63629E-06 | 0,000141704 | 2,072024278 |
| ARF4      | 4661,886545 | 5262,171702 | 4384,961966 | 7617,088115 | 9381,232604 | 10849,62358 | 6260,399059 | 0,960596939 | 0,205411262 | 4,676457031 | 2,91874E-06 | 0,000153939 | 1,946114966 |
| HNRNPA3   | 2091,184161 | 2912,471344 | 2295,584262 | 5683,945253 | 4089,140145 | 4463,390805 | 2848,848447 | 0,963347593 | 0,206114361 | 4,673849945 | 2,95605E-06 | 0,000155179 | 1,949828984 |
| PLK2      | 3467,418771 | 3318,770958 | 3033,011687 | 7227,331869 | 7136,918584 | 5004,037211 | 4636,916012 | 0,980145443 | 0,21051034  | 4,656044169 | 3,22343E-06 | 0,000167648 | 1,97266427  |
| CREBRF    | 90,01786125 | 124,9141209 | 98,32365667 | 176,8338523 | 225,553559  | 249,5291105 | 195,2845298 | 1,050766294 | 0,225902747 | 4,651409995 | 3,29673E-06 | 0,000169888 | 2,071629911 |
| MIB1      | 432,7781791 | 549,6221318 | 667,7815016 | 959,9551984 | 1048,094647 | 1012,794625 | 709,0685819 | 0,869808245 | 0,187303603 | 4,64384149  | 3,4199E-06  | 0,00017543  | 1,827419993 |
| CNOT6     | 283,9024855 | 470,7290028 | 525,7584419 | 798,7597139 | 850,5950136 | 1082,515994 | 717,3400405 | 1,089709145 | 0,235177344 | 4,633563447 | 3,59425E-06 | 0,000181882 | 2,128311242 |
| C9orf41   | 12,11778901 | 39,44656448 | 60,08667908 | 150,368922  | 112,215701  | 140,6659201 | 77,72284352 | 1,828267438 | 0,395157481 | 4,62668057  | 3,71573E-06 | 0,000187174 | 3,551103569 |
| LINC00630 | 29,42891618 | 43,39122093 | 27,31212685 | 67,36527708 | 98,74981689 | 111,3095542 | 57,49827316 | 1,46094801  | 0,316211602 | 4,62015941  | 3,83445E-06 | 0,000189763 | 2,752891996 |
| MAPK6     | 297,7513872 | 486,5076286 | 636,3725557 | 1166,862835 | 1092,980928 | 1751,596501 | 874,241773  | 1,495700266 | 0,325434157 | 4,596014996 | 4,30648E-06 | 0,000210343 | 2,820009976 |
| PDCD4     | 694,1761993 | 574,6049559 | 452,0156994 | 1178,892349 | 1516,034121 | 1060,49872  | 877,5567032 | 1,127520419 | 0,24611778  | 4,581222935 | 4,62265E-06 | 0,00022384  | 2,184829076 |
| CEP85L    | 48,47115606 | 86,78244186 | 68,28031713 | 141,9482624 | 163,8349235 | 151,6745574 | 92,76675951 | 1,153646508 | 0,252377894 | 4,571107599 | 4,85153E-06 | 0,000233915 | 2,224755061 |
| LSM14A    | 1203,123338 | 1137,375943 | 1103,409925 | 1605,940087 | 1588,974326 | 1746,703773 | 1379,084924 | 0,521575534 | 0,114277517 | 4,564113306 | 5,0161E-06  | 0,000240816 | 1,435522093 |
| CSDE1     | 51,93338149 | 101,2461822 | 103,786082  | 232,1696156 | 188,5223777 | 220,1727445 | 86,30133909 | 1,305281735 | 0,286917511 | 4,549327543 | 5,38176E-06 | 0,000251911 | 2,471319835 |
| PCMTD1    | 12,11778901 | 26,29770965 | 20,48409514 | 63,75642295 | 80,79530473 | 62,38227762 | 49,94981369 | 1,788425725 | 0,393665353 | 4,543010225 | 5,54566E-06 | 0,000258431 | 3,454377437 |
| B3GNT5    | 36,35336704 | 55,22519027 | 20,48409514 | 103,4538184 | 117,8264861 | 105,1936446 | 112,1169696 | 1,538461425 | 0,33885049  | 4,540236688 | 5,61911E-06 | 0,000259774 | 2,904845484 |
| STARD3NL  | 476,055997  | 544,3625898 | 648,6630128 | 923,8666571 | 972,9101277 | 902,7082526 | 636,2542311 | 0,7440345   | 0,164067932 | 4,534917288 | 5,76261E-06 | 0,000265316 | 1,674853026 |
| PIK3R3    | 79,63118495 | 119,6545789 | 208,9377704 | 329,6086771 | 348,9908301 | 308,2418424 | 163,8078665 | 1,308538541 | 0,286775113 | 4,53162358  | 5,85321E-06 | 0,000268388 | 2,476905008 |
| DNAJB4    | 107,3289884 | 151,2118305 | 178,8944309 | 233,372567  | 328,792004  | 358,3923008 | 198,1605292 | 1,066233007 | 0,235384512 | 4,529750061 | 5,90535E-06 | 0,000269678 | 2,093958728 |
| EPHB2     | 192,1535115 | 237,9942724 | 237,6155036 | 351,2618019 | 373,6782844 | 370,62412   | 1004,20505  | 0,708669743 | 0,157159136 | 4,509249431 | 6,50574E-06 | 0,000295893 | 1,634296496 |
| FAM104B   | 150,6068063 | 185,3988531 | 204,8409514 | 324,7968716 | 298,4937647 | 382,8559391 | 226,9035824 | 0,889669109 | 0,197606848 | 4,502218014 | 6,72479E-06 | 0,000303399 | 1,852751135 |
| PGRMC2    | 148,8756936 | 188,028624  | 342,767192  | 555,7635359 | 592,4989013 | 573,6723177 | 352,7606611 | 1,337469018 | 0,297725589 | 4,492287755 | 7,04621E-06 | 0,000316629 | 2,527075939 |
| NNMT      | 1603,010375 | 1467,412199 | 1895,461604 | 2514,168377 | 3012,991572 | 2541,772018 | 1234,537103 | 0,700346043 | 0,156284649 | 4,481220961 | 7,42172E-06 | 0,000326963 | 1,624894491 |
| BTAF1     | 173,1112716 | 142,0076321 | 166,6039738 | 257,4315945 | 337,76926   | 371,8473019 | 223,4821993 | 1,008009612 | 0,225327448 | 4,473532281 | 7,69379E-06 | 0,000337625 | 2,01113456  |
| SDC2      | 292,5580491 | 327,4064852 | 292,2397573 | 525,6897515 | 534,1467368 | 546,7623156 | 272,719506  | 0,81546319  | 0,182886207 | 4,458855603 | 8,23984E-06 | 0,000358784 | 1,75986308  |
| ATP8B1    | 242,3557803 | 365,5381642 | 385,1009886 | 561,7782928 | 574,5443892 | 746,1409676 | 511,5739162 | 0,917867163 | 0,206125006 | 4,452963672 | 8,46931E-06 | 0,000367352 | 1,889320114 |
| GLT8D2    | 57,12671964 | 38,131679   | 58,72107273 | 110,6715266 | 124,5594281 | 118,6486457 | 51,31214368 | 1,208950172 | 0,272492937 | 4,436629383 | 9,13784E-06 | 0,000391811 | 2,31169357  |
| KIAA1430  | 1075,020997 | 1075,576325 | 1061,076128 | 1489,253804 | 1661,914532 | 1694,106951 | 949,6407276 | 0,593328306 | 0,134044549 | 4,426351623 | 9,58403E-06 | 0,00040938  | 1,50872337  |
| GLCL      | 200,8090751 | 278,7557223 | 255,3683861 | 443,8890579 | 509,4592826 | 362,0618466 | 255,5576968 | 0,835474701 | 0,18897072  | 4,421185995 | 9,81606E-06 | 0,00041301  | 1,784444091 |
| FAM217B   | 166,1868208 | 119,6545789 | 117,4421455 | 226,1548588 | 377,76926   | 275,2159307 | 290,6763158 | 1,065041148 | 0,24111288  | 4,417188948 | 9,99928E-06 | 0,000418474 | 2,092229552 |
| SOD2      | 4440,304117 | 3635,65836  | 3191,422023 | 5829,50237  | 7807,968476 | 9283,950728 | 5462,360106 | 1,024763988 | 0,232018585 | 4,416732336 | 1,00204E-05 | 0,000418474 | 2,034626511 |
| NUAK1     | 114,2534393 | 172,2499982 | 152,9479104 | 291,1142331 | 250,2410132 | 254,4218381 | 262,6470023 | 0,846718886 | 0,191865895 | 4,413076564 | 1,01912E-05 | 0,000424029 | 1,798406165 |
| IKBIP     | 488,173786  | 545,6774753 | 599,5011844 | 939,505025  | 839,3734435 | 916,1632537 | 613,0428885 | 0,72065869  | 0,163622045 | 4,404410714 | 1,06072E-05 | 0,000439709 | 1,647934259 |
| OPN3      | 493,3671242 | 453,6354915 | 438,359636  | 680,870479  | 682,2714621 | 759,5959687 | 385,3053066 | 0,617212824 | 0,140250547 | 4,400787292 | 1,07859E-05 | 0,000445473 | 1,533908923 |
| HAT1      | 995,3898119 | 1153,154568 | 1412,036958 | 1951,187132 | 1935,720842 | 2106,319256 | 1387,595859 | 0,750097123 | 0,170975823 | 4,387153165 | 1,14844E-05 | 0,000469148 | 1,681906054 |
| INADL     | 100,4045375 | 118,3396934 | 120,1733582 | 214,125345  | 227,797873  | 292,3404775 | 90,97228606 | 1,111376081 | 0,253390572 | 4,386019861 | 1,15444E-05 | 0,000469889 | 2,160516249 |
| PMM2      | 682,0584102 | 635,0896882 | 669,1471079 | 1032,132281 | 1192,852902 | 1229,297824 | 791,9608825 | 0,798719537 | 0,182206427 | 4,383596941 | 1,16736E-05 | 0,000473433 | 1,739556499 |
| NCBP2     | 500,291575  | 585,1240398 | 536,6832927 | 784,3242974 | 840,4956005 | 825,647792  | 834,8138732 | 0,593304592 | 0,135416358 | 4,381336195 | 1,17954E-05 | 0,000476652 | 1,50869857  |
| KLHL2     | 344,4914306 | 436,5419803 | 443,8220614 | 739,8150965 | 736,1349986 | 705,7759645 | 463,2305146 | 0,830287698 | 0,189731903 | 4,376110108 | 1,20816E-05 | 0,000486468 | 1,778039899 |
| RPS13     | 11049,69247 | 11233,06668 | 13213,60697 | 18649,35519 | 19561,441   | 22754,85315 | 16885,97211 | 0,780281442 | 0,178433677 | 4,372949412 | 1,22579E-05 | 0,000488317 | 1,717465884 |

|           |             |             |             |             |             |             |             |             |             |             |             |             |             |
|-----------|-------------|-------------|-------------|-------------|-------------|-------------|-------------|-------------|-------------|-------------|-------------|-------------|-------------|
| SEMA3C    | 758,2273698 | 796,8206025 | 867,1600276 | 1362,943909 | 1233,250554 | 1871,468329 | 983,8070586 | 0,88255916  | 0,202274254 | 4,363180898 | 1,28185E-05 | 0,000508844 | 1,843642793 |
| SETD8     | 57,12671964 | 76,263358   | 116,0765391 | 218,9371505 | 176,1786506 | 256,868202  | 122,9424151 | 1,377485055 | 0,316436324 | 4,353119256 | 1,34214E-05 | 0,000529039 | 2,598150595 |
| DSG2      | 569,5360837 | 1019,036249 | 1261,820261 | 1903,069077 | 2156,785773 | 2282,457452 | 1280,985642 | 1,152367961 | 0,264947952 | 4,349412601 | 1,36503E-05 | 0,000536179 | 2,222784309 |
| MGLL      | 725,3362281 | 853,3606783 | 673,2439269 | 1119,947731 | 1293,847033 | 1378,526017 | 764,1803503 | 0,751355121 | 0,173013916 | 4,34274386  | 1,40714E-05 | 0,000548883 | 1,683373278 |
| GANC      | 29,42891618 | 64,42938865 | 77,83956153 | 128,7157973 | 135,7809982 | 144,3354659 | 79,617298   | 1,229547329 | 0,283406607 | 4,338456827 | 1,43487E-05 | 0,000557761 | 2,344934019 |
| SLC7A11   | 155,8001445 | 201,1774789 | 217,1314085 | 393,3651001 | 311,9596488 | 355,945937  | 223,2039818 | 0,880517659 | 0,203137915 | 4,334580564 | 1,46038E-05 | 0,000565722 | 1,841035772 |
| TRIM55    | 1054,247644 | 1015,091593 | 1196,271156 | 2054,640951 | 1620,394723 | 1913,056514 | 745,4545699 | 0,774726753 | 0,178915902 | 4,33011681  | 1,4903E-05  | 0,000573358 | 1,710865982 |
| ZNF323    | 140,22013   | 119,6545789 | 176,1632182 | 242,996178  | 320,9369049 | 267,8768392 | 137,8032524 | 0,932282206 | 0,215399914 | 4,328145672 | 1,5037E-05  | 0,000576538 | 1,908292346 |
| SLC2A3    | 327,1803034 | 470,7290028 | 621,3508859 | 870,9367965 | 890,992666  | 903,9314345 | 635,1326307 | 0,906005167 | 0,20991216  | 4,316115693 | 1,58799E-05 | 0,000600655 | 1,873849605 |
| PPP2CA    | 931,3386414 | 1192,601133 | 1417,499384 | 1947,578278 | 1948,064569 | 2533,209744 | 1877,37084  | 0,859049586 | 0,199087586 | 4,314932949 | 1,59651E-05 | 0,000601853 | 1,813842999 |
| NADKD1    | 1104,449913 | 844,1564799 | 890,3753354 | 1489,253804 | 1969,385553 | 1669,643313 | 1203,061231 | 0,854403945 | 0,198187194 | 4,311095631 | 1,62448E-05 | 0,000608312 | 1,808011614 |
| CENPQ     | 162,7245953 | 220,9007611 | 255,3683861 | 396,9739542 | 397,2435816 | 393,8645763 | 379,9529488 | 0,888845712 | 0,206425962 | 4,305881404 | 1,66322E-05 | 0,000614839 | 1,851694007 |
| MAN2A1    | 424,1226155 | 412,8740416 | 486,155858  | 639,9701322 | 683,3936191 | 768,1582421 | 706,0560714 | 0,659779791 | 0,153362738 | 4,302086678 | 1,69197E-05 | 0,000620125 | 1,579841463 |
| NUAK2     | 3,462225433 | 7,889312896 | 4,096819028 | 30,07378441 | 21,32098319 | 30,57954785 | 35,21754968 | 2,366851993 | 0,551917384 | 4,288417181 | 1,79951E-05 | 0,000651563 | 5,158143799 |
| WDR75     | 695,907312  | 775,7824348 | 853,5039642 | 1194,530717 | 1246,716438 | 1236,636915 | 1124,308913 | 0,660251041 | 0,154113519 | 4,284186403 | 1,83409E-05 | 0,000658063 | 1,580357596 |
| AMOTL2    | 699,3695374 | 636,4045736 | 574,9202703 | 945,5197818 | 1009,941309 | 1115,541906 | 1011,043133 | 0,685936136 | 0,160549994 | 4,272414592 | 1,93368E-05 | 0,00068482  | 1,608745525 |
| CHRD1     | 2728,233641 | 3100,499968 | 2322,896389 | 4121,311415 | 4268,685266 | 4601,610361 | 2198,669231 | 0,672348083 | 0,157453592 | 4,270134917 | 1,95355E-05 | 0,000687967 | 1,593664654 |
| TENM2     | 195,6157369 | 176,1946547 | 146,1198787 | 315,1732606 | 291,7608226 | 335,1518445 | 145,0198498 | 0,866725774 | 0,203059812 | 4,268327468 | 1,96944E-05 | 0,000691397 | 1,823519685 |
| LPP       | 289,0958236 | 310,3129739 | 278,5836939 | 501,630724  | 424,1753498 | 538,2000422 | 290,0399471 | 0,736479201 | 0,172663568 | 4,265400103 | 1,99544E-05 | 0,000698343 | 1,666104858 |
| ZMYM6     | 107,3248984 | 142,0076321 | 124,2701772 | 202,0958312 | 231,1643441 | 209,1641073 | 187,7069134 | 0,774823461 | 0,181914298 | 4,259277416 | 2,05089E-05 | 0,000715518 | 1,71098067  |
| BMI1      | 115,984552  | 213,0114482 | 188,4536753 | 325,999823  | 345,6243591 | 380,4095753 | 248,0725537 | 1,015361467 | 0,238498527 | 4,257307079 | 2,06904E-05 | 0,000719616 | 2,021409293 |
| RHEB      | 1661,868208 | 1593,641205 | 1470,758031 | 2223,054144 | 2196,061269 | 2407,222007 | 1426,140716 | 0,530848014 | 0,124971133 | 4,247765064 | 2,15914E-05 | 0,00074633  | 1,444778184 |
| SRSF5     | 1798,626112 | 1743,53815  | 1642,82443  | 2470,862127 | 2451,913067 | 2609,047023 | 2038,742988 | 0,538949614 | 0,12710707  | 4,240123013 | 2,23397E-05 | 0,000765136 | 1,452914306 |
| MTF2      | 152,337919  | 228,790074  | 279,9493002 | 412,6123221 | 412,9537797 | 499,058221  | 365,405318  | 0,99661823  | 0,235301767 | 4,235489774 | 2,28054E-05 | 0,000778711 | 1,995317361 |
| KIF5B     | 2655,526907 | 3000,568672 | 2485,403544 | 4336,639712 | 5248,328336 | 4725,151734 | 2893,042371 | 0,813613448 | 0,192148077 | 4,234304396 | 2,2926E-05  | 0,000780457 | 1,75760813  |
| FLG       | 1055,978757 | 834,9522815 | 1160,765391 | 1987,275674 | 1686,601986 | 1734,471954 | 705,8378581 | 0,825923558 | 0,195312869 | 4,228720619 | 2,35024E-05 | 0,000797661 | 1,77266947  |
| MT1L      | 995,3898119 | 861,2499912 | 711,4809045 | 1373,770472 | 1550,820988 | 1763,82832  | 604,7527105 | 0,869420504 | 0,2060557   | 4,219347022 | 2,45011E-05 | 0,000821628 | 1,826928919 |
| FNTA      | 638,7805923 | 658,7576268 | 611,7916415 | 937,0991222 | 962,8107146 | 1058,052356 | 990,972153  | 0,631409265 | 0,149820909 | 4,214426877 | 2,50413E-05 | 0,00083476  | 1,549077437 |
| SLC11A2   | 361,8025577 | 493,082056  | 523,0272292 | 685,6822845 | 844,9842286 | 933,2878005 | 738,2080079 | 0,835607436 | 0,198315776 | 4,21351974  | 2,51422E-05 | 0,000835642 | 1,784608277 |
| EHD2      | 100,4045375 | 95,98664024 | 98,32365667 | 175,630901  | 151,4911964 | 173,6918318 | 610,2586136 | 0,765310639 | 0,181664476 | 4,212769921 | 2,52258E-05 | 0,000835949 | 1,699735943 |
| RCHY1     | 143,6823555 | 243,2538143 | 267,6588432 | 457,121523  | 421,9310358 | 470,9250369 | 241,3180145 | 1,037994223 | 0,247417027 | 4,195322511 | 2,72484E-05 | 0,000892443 | 2,053370868 |
| NEDD4     | 2783,629248 | 2218,211809 | 1898,192816 | 3582,389199 | 4163,202507 | 4722,70537  | 2360,37581  | 0,854123756 | 0,203884769 | 4,189247491 | 2,79881E-05 | 0,000911358 | 1,80766051  |
| DICER1    | 290,8269363 | 377,3721335 | 452,0156994 | 590,6491258 | 740,6236266 | 648,2864145 | 395,9156928 | 0,818085998 | 0,195389454 | 4,186950623 | 2,82727E-05 | 0,000917965 | 1,763065408 |
| FUCA1     | 96,94231212 | 89,41221282 | 106,5172947 | 204,501734  | 199,7439478 | 157,7904669 | 260,022888  | 0,941320567 | 0,225740996 | 4,16991413  | 3,04714E-05 | 0,000967232 | 1,920285162 |
| LOC152217 | 202,5401878 | 205,1221353 | 185,7224626 | 289,9112817 | 302,9823927 | 331,4822987 | 308,7893643 | 0,640044853 | 0,153486269 | 4,170046341 | 3,04538E-05 | 0,000967232 | 1,558377608 |
| COL4A3BP  | 195,6157369 | 261,6622111 | 355,0576491 | 443,8890579 | 500,4820265 | 517,4059497 | 405,1234285 | 0,842019011 | 0,201994324 | 4,168528084 | 3,06573E-05 | 0,000970152 | 1,79255702  |
| THRB      | 32,89114161 | 43,39122093 | 62,81789176 | 115,4833321 | 113,337858  | 122,3181914 | 47,6251035  | 1,323603433 | 0,317885808 | 4,163770139 | 3,13035E-05 | 0,00098782  | 2,502904826 |
| CLDN16    | 3585,134436 | 4169,501866 | 3285,64886  | 5438,543173 | 7176,194079 | 6931,771907 | 2564,802115 | 0,824077202 | 0,198197447 | 4,15785983  | 3,21243E-05 | 0,001010881 | 1,770402265 |
| ABCB10    | 257,9357947 | 285,3301497 | 292,2397573 | 464,3392313 | 452,2292751 | 456,246854  | 254,8201477 | 0,714266822 | 0,171895927 | 4,155228308 | 3,24963E-05 | 0,00101973  | 1,640649227 |
| CYBRD1    | 931,3386414 | 781,0419767 | 865,7944212 | 1234,228112 | 1318,534487 | 1439,685113 | 1348,36886  | 0,632013501 | 0,152363303 | 4,148069059 | 3,35291E-05 | 0,001046295 | 1,549726365 |
| WEE1      | 851,7074564 | 694,2595349 | 708,7496918 | 1156,036273 | 1009,941309 | 1296,572829 | 833,1818887 | 0,620555036 | 0,150020346 | 4,136472496 | 3,52686E-05 | 0,001092824 | 1,537466565 |
| FIGN      | 282,1713728 | 502,2862544 | 419,2411472 | 868,5308937 | 815,8081463 | 742,4714219 | 347,804712  | 1,008361482 | 0,244440328 | 4,125184615 | 3,70437E-05 | 0,001130841 | 2,011625131 |
| MYL12B    | 5577,645172 | 4081,404538 | 3861,934737 | 7490,778221 | 8392,612278 | 9226,461178 | 5426,878397 | 0,893338481 | 0,216531924 | 4,125666383 | 3,69663E-05 | 0,001130841 | 1,857469448 |
| TMEM2     | 579,922276  | 1041,389302 | 1633,265186 | 2585,142508 | 2136,586947 | 3207,182979 | 1160,69927  | 1,283543144 | 0,311144436 | 4,125232511 | 3,7036E-05  | 0,001130841 | 2,434361029 |
| EIF4B     | 2833,831517 | 2703,404552 | 3226,927788 | 6393,686565 | 6878,822472 | 4530,66581  | 3950,492614 | 1,022452024 | 0,248611434 | 4,112650848 | 3,91142E-05 | 0,001181206 | 2,031368569 |
| TINAGL1   | 1071,558771 | 727,1316719 | 625,4477049 | 1353,320298 | 1435,238816 | 1569,342396 | 1896,871975 | 0,84849467  | 0,206462856 | 4,109672258 | 3,96221E-05 | 0,001190146 | 1,800621149 |
| FZD2      | 60,58894507 | 56,54007576 | 35,50576491 | 109,4685753 | 125,6815851 | 94,18500739 | 86,53537342 | 1,120050162 | 0,272994297 | 4,102833557 | 4,08121E-05 | 0,001209718 | 2,173545297 |
| TJP1      | 476,055997  | 624,5706043 | 663,6846825 | 945,5197818 | 951,5891445 | 1031,142354 | 497,6972888 | 0,728346397 | 0,177488761 | 4,103619807 | 4,06736E-05 | 0,001209718 | 1,656739065 |
| HIST1H2BC | 4173,712759 | 3609,36065  | 3912,462172 | 6224,070421 | 7320,952334 | 6267,584128 | 3347,630809 | 0,760635899 | 0,185558042 | 4,099180457 | 4,14616E-05 | 0,001216134 | 1,694237232 |
| KDELR1    | 4715,551039 | 4904,522851 | 4216,992386 | 6197,605491 | 7149,262311 | 7642,440599 | 5241,02755  | 0,60114894  | 0,147057558 | 4,087847962 | 4,35393E-05 | 0,001267153 | 1,516924141 |

|           |             |             |             |             |             |             |              |             |             |             |             |             |             |
|-----------|-------------|-------------|-------------|-------------|-------------|-------------|--------------|-------------|-------------|-------------|-------------|-------------|-------------|
| STC2      | 214,6579768 | 157,7862579 | 90,13001862 | 286,3024276 | 325,4255329 | 324,1432072 | 1364,568561  | 1,02577569  | 0,251193977 | 4,083599869 | 4,43434E-05 | 0,001287218 | 2,03605381  |
| IL1RAP    | 25,96669075 | 28,92748062 | 73,7427425  | 95,03315873 | 107,727073  | 136,9963744 | 89,16373909  | 1,386652846 | 0,34038835  | 4,07373768  | 4,62646E-05 | 0,001332657 | 2,614713446 |
| ATRX      | 53,66449421 | 99,93129669 | 131,0982089 | 224,9519074 | 178,4229646 | 207,9409254 | 169,458446   | 1,088023015 | 0,267195856 | 4,07200558  | 4,66101E-05 | 0,001339175 | 2,125825262 |
| ACO1      | 931,3386414 | 1146,580141 | 781,126828  | 1500,080366 | 1678,746887 | 1727,132863 | 1096,215973  | 0,778663788 | 0,191886645 | 4,057936331 | 4,95083E-05 | 0,001415206 | 1,715541217 |
| CHRN81    | 24,23557803 | 24,98282417 | 20,48409514 | 68,56822845 | 60,59647854 | 45,25773082 | 90,92384507  | 1,326661123 | 0,326994018 | 4,057141869 | 4,96769E-05 | 0,001416422 | 2,50821518  |
| NBN       | 463,938208  | 660,0725123 | 815,2669866 | 1323,246514 | 1131,134266 | 1635,394219 | 786,2019891  | 1,074878853 | 0,265408197 | 4,049908281 | 5,12377E-05 | 0,001451208 | 2,106545173 |
| SLC24A6   | 19,04223988 | 32,87213707 | 25,94652051 | 58,94461744 | 78,55099071 | 106,4168265 | 57,67796266  | 1,63259249  | 0,40313963  | 4,049694872 | 5,12845E-05 | 0,001451208 | 3,100696866 |
| NEXN      | 289,0958236 | 389,2061029 | 363,2512871 | 731,3944368 | 755,2116678 | 1059,275538 | 305,1912518  | 1,288073263 | 0,31825274  | 4,047328111 | 5,18056E-05 | 0,001462272 | 2,442017032 |
| FAM49B    | 363,5336704 | 376,0572481 | 402,8538711 | 595,4609313 | 571,1779181 | 579,7882273 | 441,9696588  | 0,611077072 | 0,151133682 | 4,043288447 | 5,27067E-05 | 0,001483978 | 1,527399093 |
| DPYSL3    | 2020,20854  | 1931,566774 | 2507,253245 | 3279,245452 | 3877,05247  | 4651,760819 | 3064,171643  | 0,870249965 | 0,215303526 | 4,041968013 | 5,30045E-05 | 0,00148863  | 1,827979593 |
| CTGF      | 808,4296385 | 812,5992283 | 946,3651955 | 1329,261271 | 1256,815851 | 1341,83056  | 1418,614786  | 0,612796735 | 0,15180257  | 4,036800797 | 5,4185E-05  | 0,001516669 | 1,529220806 |
| UBLCP1    | 27,69780346 | 69,68893058 | 142,0230596 | 271,8670111 | 200,8661048 | 285,001386  | 130,39554    | 1,651206115 | 0,409076795 | 4,036420875 | 5,42728E-05 | 0,001516669 | 3,140961186 |
| CPM       | 1,731112716 | 13,14885483 | 8,193638056 | 32,47968716 | 20,19882618 | 33,02591168 | 59,58049939  | 1,80676899  | 0,448262509 | 4,030604733 | 5,56335E-05 | 0,001550836 | 3,498578809 |
| PPP1R21   | 145,4134682 | 143,3225176 | 150,2166977 | 249,0109349 | 243,5080712 | 243,4132009 | 156,182491   | 0,745339896 | 0,185051826 | 4,027735963 | 5,63165E-05 | 0,001564129 | 1,676369172 |
| TMEM64    | 297,7513872 | 426,0228964 | 544,8769307 | 994,8407883 | 822,5410884 | 730,2396027 | 440,2654088  | 1,003190583 | 0,249089252 | 4,027434236 | 5,63888E-05 | 0,001564129 | 2,004427981 |
| ZNF564    | 24,23557803 | 22,35305321 | 36,87137125 | 64,95937432 | 74,06236266 | 75,83727868 | 39,46251609  | 1,358649397 | 0,337941712 | 4,020366087 | 5,81078E-05 | 0,001599958 | 2,564449918 |
| LINC00152 | 200,8090751 | 169,6202273 | 196,6473133 | 346,4499964 | 329,914161  | 419,5513965 | 190,566832   | 0,951800741 | 0,236902966 | 4,017681832 | 5,87735E-05 | 0,001614331 | 1,934285485 |
| GIGYF2    | 701,1006501 | 661,3873978 | 716,9433299 | 970,7817607 | 1080,637201 | 1317,366922 | 788,0271402  | 0,696110822 | 0,173298382 | 4,01683395  | 5,89853E-05 | 0,001616196 | 1,620131395 |
| ZBTB4     | 479,5182224 | 507,5457963 | 420,6067535 | 743,4239506 | 814,6859893 | 1026,249626 | 753,5990815  | 0,876467893 | 0,218472445 | 4,011800625 | 6,02574E-05 | 0,001639092 | 1,835875077 |
| CFI2      | 687,2517484 | 1033,499989 | 1487,145307 | 2316,884351 | 1830,238083 | 2530,76338  | 1279,361105  | 1,651544731 | 0,263477954 | 4,00999292  | 6,07206E-05 | 0,001647669 | 2,079944064 |
| VPS33A    | 93,48008668 | 168,3053418 | 243,077929  | 372,9149267 | 411,8316227 | 298,456387  | 405,5950314  | 1,093710606 | 0,273229936 | 4,002894497 | 6,25722E-05 | 0,001693822 | 2,134222524 |
| ZNF599    | 6,924450865 | 13,14885483 | 4,096819028 | 18,04427065 | 39,27549535 | 35,47227551 | 37,14757058  | 1,923307382 | 0,481651121 | 3,993154582 | 6,52E-05    | 0,001743946 | 3,792915897 |
| ARMC1     | 1365,847933 | 1201,805331 | 1100,678712 | 1675,711267 | 2188,20617  | 2065,954253 | 1279,388524  | 0,693735182 | 0,174122381 | 3,984181583 | 6,77131E-05 | 0,00180258  | 1,617465771 |
| THAP6     | 34,62225433 | 72,31870155 | 53,25864736 | 122,7010404 | 102,1162879 | 130,8804648 | 90,19604114  | 1,130886327 | 0,284224505 | 3,97884879  | 6,92498E-05 | 0,001834792 | 2,189932385 |
| CSF1      | 585,1160981 | 403,6698432 | 540,7801117 | 787,9331515 | 848,3506996 | 1084,962358 | 530,1084201  | 0,832857954 | 0,209468888 | 3,976046099 | 7,00705E-05 | 0,001847823 | 1,781210416 |
| GLIPR1    | 368,7270086 | 487,8225141 | 486,155858  | 665,2321111 | 759,7002958 | 1069,060993 | 581,1635603  | 0,89112972  | 0,224108477 | 3,976332051 | 6,99864E-05 | 0,001847823 | 1,854627844 |
| GALNT2    | 1639,363742 | 1738,278608 | 1384,724831 | 2571,910043 | 2613,503676 | 2199,281082 | 2093,484993  | 0,633051659 | 0,159311489 | 3,97367235  | 7,07729E-05 | 0,001861974 | 1,550841943 |
| MYBL1     | 81,36229767 | 98,6164112  | 129,7326026 | 193,6751716 | 197,4996338 | 216,5013988 | 195,51385969 | 0,964988805 | 0,249267212 | 3,971756811 | 7,13445E-05 | 0,001872627 | 1,952048374 |
| CLIP4     | 406,8114883 | 491,7671705 | 449,2844867 | 664,0291598 | 806,8308902 | 1125,327361 | 507,057681   | 0,944557132 | 0,237905934 | 3,970296655 | 7,17832E-05 | 0,001875378 | 1,924597997 |
| ACAT2     | 702,8317628 | 728,4465574 | 1025,570363 | 1408,656062 | 1421,772932 | 1990,116974 | 919,1024113  | 0,971671716 | 0,24483558  | 3,968670384 | 7,22748E-05 | 0,001883839 | 1,961111708 |
| LMNB1     | 869,0185836 | 882,2881589 | 867,1600276 | 1431,512138 | 1649,570805 | 2014,580613 | 1311,500526  | 0,960479002 | 0,242467941 | 3,961261846 | 7,45547E-05 | 0,001929833 | 1,945955882 |
| PIK3CB    | 758,2273698 | 750,7996106 | 738,7930314 | 1176,486446 | 1269,159578 | 1376,079653 | 777,6819639  | 0,765768713 | 0,193946363 | 3,94835304  | 7,86907E-05 | 0,002027549 | 1,700275717 |
| UBE2J1    | 787,6562859 | 674,5362526 | 611,7916415 | 1067,017871 | 1020,040722 | 1301,465557 | 757,9292059  | 0,709559697 | 0,179737686 | 3,947751366 | 7,88887E-05 | 0,002027998 | 1,635304955 |
| TEX15     | 15,58001445 | 11,83396934 | 2,731212685 | 22,85607615 | 43,76412339 | 50,15045848 | 24,57912771  | 1,990461461 | 0,504913387 | 3,942183968 | 8,0743E-05  | 0,002066212 | 3,973640789 |
| CPA4      | 0           | 5,259541931 | 2,731212685 | 10,82656239 | 15,71019814 | 29,35636594 | 3048,740874  | 2,689361256 | 0,682616347 | 3,939784432 | 8,15549E-05 | 0,002073293 | 6,450277622 |
| GIN51     | 251,0113439 | 357,6488513 | 417,8755409 | 670,0439166 | 542,0018359 | 557,7709528 | 445,1694661  | 0,780987869 | 0,198233857 | 3,939729966 | 8,15734E-05 | 0,002073293 | 1,718307061 |
| EIF2C2    | 1035,205404 | 958,5515169 | 740,1586377 | 1442,3387   | 1652,937276 | 2465,934739 | 987,924475   | 1,024845699 | 0,261446918 | 3,919899716 | 8,85858E-05 | 0,00224644  | 2,03474175  |
| HINT3     | 93,48008668 | 109,1354951 | 142,0230596 | 205,7046854 | 273,8063105 | 278,8854764 | 179,5191281  | 1,13388289  | 0,289490446 | 3,916823187 | 8,97235E-05 | 0,002261016 | 2,194485732 |
| SEC11A    | 1410,856864 | 1600,215632 | 1746,610512 | 2173,733137 | 2840,179392 | 2659,197481 | 2038,933249  | 0,68907599  | 0,176077617 | 3,913478616 | 9,0976E-05  | 0,002281303 | 1,612250582 |
| COX10     | 534,9138294 | 482,5629722 | 436,9940296 | 648,3907919 | 712,5697014 | 757,1496048 | 665,0483398  | 0,544765344 | 0,139390486 | 3,908196029 | 9,29878E-05 | 0,00232656  | 1,458783052 |
| CLCN5     | 34,62225433 | 24,98282417 | 46,43061565 | 91,4243046  | 62,84079256 | 96,63137122 | 44,44532415  | 1,241698812 | 0,318609429 | 3,897244391 | 9,72934E-05 | 0,002418129 | 2,364768262 |
| MGST3     | 1357,19237  | 1391,148841 | 1166,227817 | 1747,88835  | 2281,345201 | 2397,436552 | 1109,967754  | 0,715412035 | 0,183859963 | 3,891070265 | 9,9803E-05  | 0,002469575 | 1,641952094 |
| RALGAPB   | 304,6758381 | 374,7423626 | 349,5952237 | 505,2395781 | 511,7035966 | 645,8400507 | 850,5593236  | 0,689312357 | 0,177429033 | 3,885003186 | 0,000102329 | 0,002520962 | 1,612514749 |
| SHISA9    | 48,47115606 | 28,92748062 | 35,50576491 | 125,1069431 | 155,9798244 | 59,93591379 | 39,00514731  | 1,6070168   | 0,413917465 | 3,882457095 | 0,000103406 | 0,002536389 | 3,046212952 |
| CYCS      | 938,2630923 | 1685,683189 | 1958,279495 | 2795,658999 | 2840,179392 | 2736,257942 | 1976,304407  | 0,868292937 | 0,224257367 | 3,87185915  | 0,000108008 | 0,0026073   | 1,825501604 |
| DLEU1     | 119,4467774 | 84,15267089 | 83,3019869  | 172,0220468 | 186,2780637 | 228,7350179 | 100,0341498  | 1,040970285 | 0,268987854 | 3,869952752 | 0,000108856 | 0,0026073   | 2,057611035 |
| EDIL3     | 444,8959681 | 314,2576304 | 337,3047666 | 564,1841955 | 668,805578  | 747,3641495 | 400,8582918  | 0,855988867 | 0,221003252 | 3,873195804 | 0,000107417 | 0,0026073   | 1,809998959 |
| HLA-C     | 22,50446531 | 23,66793869 | 34,14015857 | 89,01840185 | 92,01687483 | 48,92727657 | 873,2822089  | 1,512544345 | 0,390899308 | 3,869396319 | 0,000109105 | 0,0026073   | 2,853127748 |
| IL32      | 290,8269363 | 282,7003788 | 251,271567  | 405,3946138 | 445,496333  | 510,0668582 | 233,7412802  | 0,723597296 | 0,186976366 | 3,869993364 | 0,000108838 | 0,0026073   | 1,651294335 |
| RASA1     | 1487,025823 | 1780,354944 | 1813,525223 | 2374,626017 | 2502,410132 | 2341,170184 | 1508,808122  | 0,505550947 | 0,130565289 | 3,872016455 | 0,000107939 | 0,0026073   | 1,419665405 |

|           |             |             |             |             |              |             |             |             |             |             |             |             |             |
|-----------|-------------|-------------|-------------|-------------|--------------|-------------|-------------|-------------|-------------|-------------|-------------|-------------|-------------|
| TBC1D2B   | 12,11778901 | 11,83396934 | 32,77455222 | 74,58298534 | 66,20726359  | 45,25773082 | 38,24648169 | 1,698789144 | 0,439085108 | 3,868929079 | 0,000109314 | 0,0026073   | 3,24628383  |
| TMEM87B   | 237,1624421 | 323,4618287 | 363,2512871 | 529,2986056 | 480,2832003  | 598,135956  | 495,5829439 | 0,79472105  | 0,205283652 | 3,871331405 | 0,000108243 | 0,0026073   | 1,734741924 |
| CNN3      | 4069,845996 | 2866,450352 | 3707,62122  | 5278,55064  | 5244,961865  | 6192,970031 | 3410,94036  | 0,651630103 | 0,168613762 | 3,864631781 | 0,000111257 | 0,002648009 | 1,670306904 |
| CXCL6     | 0           | 0           | 0           | 0           | 14,58804113  | 7,339091485 | 10336,20346 | 4,7944135   | 1,242803935 | 3,857739233 | 0,000114441 | 0,002712981 | 27,74995449 |
| SFXN1     | 1125,223266 | 1275,438918 | 1170,324636 | 1987,275674 | 1922,254958  | 1601,145126 | 1773,915176 | 0,625503327 | 0,162433051 | 3,850837754 | 0,000117714 | 0,00277816  | 1,542748965 |
| PLOD2     | 1348,536806 | 1638,347311 | 1793,041128 | 2504,544766 | 2814,369781  | 3532,549368 | 2591,744565 | 0,888449802 | 0,231579081 | 3,836485566 | 0,000124808 | 0,002914943 | 1,851185927 |
| DLG1      | 195,6157369 | 270,8664094 | 267,6588432 | 350,0588505 | 390,5106395  | 490,4959476 | 311,4882465 | 0,740113209 | 0,193362658 | 3,827591203 | 0,000129403 | 0,003009769 | 1,670306904 |
| ANKRD33B  | 145,4134682 | 136,7480902 | 135,1950279 | 212,9223936 | 214,3319889  | 324,1432072 | 147,6805428 | 0,848785109 | 0,221957183 | 3,824093902 | 0,000131254 | 0,003040219 | 1,800983681 |
| DCUN1D5   | 500,291575  | 499,6564834 | 559,8986005 | 719,3649231 | 878,6489389  | 798,7377899 | 718,3648161 | 0,61939656  | 0,161950752 | 3,824598229 | 0,000130986 | 0,003040219 | 1,536232482 |
| IPO8      | 782,4629478 | 976,9599137 | 950,4620145 | 1316,028806 | 1335,366842  | 1267,216463 | 1136,691192 | 0,530236354 | 0,13951236  | 3,800640718 | 0,000144322 | 0,003282021 | 1,444165771 |
| TMTC3     | 256,204682  | 458,8950335 | 561,2642068 | 940,7079763 | 859,5722697  | 795,0682442 | 696,4159552 | 1,020760096 | 0,269155595 | 3,792453567 | 0,000149166 | 0,003371695 | 2,028987668 |
| CNOT7     | 1374,503497 | 1103,18892  | 1365,606343 | 1883,821855 | 1964,8986925 | 2486,728831 | 1510,551616 | 0,721498313 | 0,190363018 | 3,790118069 | 0,000150576 | 0,003392459 | 1,648893607 |
| TENM4     | 358,3403323 | 316,8874013 | 400,1226584 | 526,8927029 | 565,5671331  | 655,625506  | 377,7857912 | 0,701107273 | 0,185216126 | 3,785346818 | 0,000153494 | 0,003448711 | 1,625752083 |
| ABLIM1    | 154,0690318 | 168,3053418 | 204,8409514 | 268,2581569 | 319,8147479  | 434,2295795 | 141,1293622 | 0,952634695 | 0,25195302  | 3,781001293 | 0,000156199 | 0,003481623 | 1,935403928 |
| PPP4R2    | 633,5872542 | 765,2633509 | 813,9013802 | 1057,39426  | 1101,958184  | 1367,51738  | 1002,881899 | 0,670905403 | 0,177504765 | 3,779647295 | 0,000157051 | 0,003493678 | 1,592071803 |
| FNDC3A    | 782,4629478 | 746,8549542 | 839,8479007 | 1259,490091 | 1135,6282894 | 1629,27831  | 881,4600113 | 0,764173254 | 0,202345154 | 3,776582921 | 0,000158995 | 0,003516035 | 1,698396442 |
| UPF3A     | 152,337919  | 166,9904563 | 215,7658021 | 287,505379  | 267,0733684  | 319,2504796 | 188,6179942 | 0,702172912 | 0,186563186 | 3,76372706  | 0,0001674   | 0,003651586 | 1,626953381 |
| MCAM      | 2169,084234 | 1237,307239 | 991,4302048 | 2345,755184 | 3074,710208  | 3422,462996 | 1876,886073 | 1,008887937 | 0,268191622 | 3,761817505 | 0,000168683 | 0,003672454 | 2,012359329 |
| SORCS2    | 45,00893063 | 27,61259514 | 50,52743468 | 86,6124991  | 122,3151141  | 83,17637016 | 223,1330765 | 1,254381613 | 0,333770758 | 3,758213037 | 0,000171131 | 0,003716142 | 2,385648698 |
| TGFB2     | 105,5978757 | 210,3816772 | 193,9161007 | 460,7303772 | 478,0388863  | 288,6709317 | 178,8223366 | 1,26268892  | 0,336165821 | 3,756151999 | 0,000172546 | 0,003727656 | 2,399426999 |
| SEC22B    | 829,2029911 | 962,4961733 | 943,6339828 | 1324,449465 | 1257,938008  | 1469,041479 | 1130,13509  | 0,565429597 | 0,150697807 | 3,752075818 | 0,000175376 | 0,003781533 | 1,479828098 |
| CA13      | 135,0267919 | 136,7480902 | 86,03319959 | 217,7341991 | 283,9057235  | 297,2332051 | 106,232781  | 1,161065328 | 0,309548249 | 3,750837975 | 0,000176245 | 0,003792972 | 2,23622496  |
| FAM196B   | 195,6157369 | 252,4580127 | 232,1530783 | 435,4683983 | 390,5106395  | 373,0704838 | 175,8513406 | 0,814523414 | 0,217193266 | 3,750224072 | 0,000176677 | 0,003795    | 1,758717074 |
| RNF138    | 993,6586992 | 907,2709831 | 633,641343  | 1320,840611 | 1574,638285  | 1568,119214 | 896,6391412 | 0,717407047 | 0,218039171 | 3,748899993 | 0,000177612 | 0,003807809 | 1,762235882 |
| PDGFRB    | 48,47115606 | 28,92748062 | 46,43061565 | 70,97413121 | 96,50550287  | 84,39955207 | 63,54355246 | 1,039532419 | 0,277880059 | 3,740939247 | 0,000183334 | 0,003915537 | 2,055561333 |
| ADAM17    | 311,6002889 | 366,8530497 | 484,7902516 | 671,246868  | 622,7971406  | 720,4541474 | 463,6010557 | 0,789560006 | 0,211321994 | 3,736288824 | 0,000186756 | 0,003966009 | 1,728547209 |
| EIF2S3    | 1094,063237 | 1796,133569 | 2776,277695 | 3973,348396 | 3550,50478   | 4776,525375 | 2751,635478 | 1,117559916 | 0,299228415 | 3,734805459 | 0,00018786  | 0,003978095 | 2,169796762 |
| PEG10     | 12,11778901 | 22,35305321 | 21,84970148 | 34,88558992 | 52,741737947 | 48,92727657 | 453,9072678 | 1,249391482 | 0,334879468 | 3,73086917  | 0,00019082  | 0,004029465 | 2,377411244 |
| BRAF      | 273,5158092 | 295,8492336 | 267,6588432 | 440,2802038 | 460,0843741  | 511,2900401 | 375,2454088 | 0,753345358 | 0,202002791 | 3,729380931 | 0,000191951 | 0,004031001 | 1,685697139 |
| RPS6KA3   | 476,055997  | 600,9026656 | 514,8335912 | 744,626902  | 836,0069725  | 895,3691611 | 1005,187511 | 0,635501531 | 0,170405152 | 3,729356313 | 0,00019197  | 0,004031001 | 1,553477699 |
| ZNF100    | 67,51339594 | 57,85496124 | 101,0548694 | 132,3246514 | 158,2241384  | 182,2541052 | 99,32150536 | 1,059590085 | 0,284055513 | 3,730221865 | 0,000191311 | 0,004031001 | 2,084339211 |
| ATG3      | 792,8496241 | 983,5343411 | 1091,119468 | 1396,626548 | 1399,329792  | 1334,491468 | 1152,903161 | 0,524383626 | 0,140750534 | 3,725624422 | 0,000194832 | 0,004083482 | 1,438318944 |
| RFC5      | 223,3135404 | 232,7347304 | 251,271567  | 357,2765588 | 353,4794582  | 384,079121  | 278,9949333 | 0,628361613 | 0,168821054 | 3,722057161 | 0,000197606 | 0,004133909 | 1,54580851  |
| C7orf41   | 53,66449421 | 47,33587738 | 43,69940296 | 74,58298534 | 99,8719739   | 92,96182547 | 113,6652731 | 0,895363203 | 0,240841011 | 3,717652569 | 0,000201083 | 0,004198813 | 1,860078107 |
| SLC9A6    | 226,7757658 | 305,053432  | 180,2600372 | 422,2359331 | 399,4878956  | 573,6723177 | 358,4781059 | 0,968962679 | 0,260794562 | 3,715425167 | 0,000202862 | 0,004228117 | 1,957432663 |
| RPL23AP82 | 29,42891618 | 24,98282417 | 36,87137125 | 68,56822845 | 66,20726359  | 92,96182547 | 32,45988991 | 1,317441965 | 0,354685483 | 3,71439494  | 0,00020369  | 0,004237516 | 2,492238203 |
| IGFBP3    | 915,7586269 | 1029,555333 | 1138,91569  | 1488,050853 | 1732,610424  | 1926,511515 | 802,901828  | 0,738209111 | 0,198902053 | 3,711420273 | 0,0002061   | 0,004263946 | 1,668103853 |
| SEC11C    | 460,4759825 | 443,1164077 | 400,1226584 | 660,4203056 | 613,8198845  | 722,9005113 | 588,5533602 | 0,616095123 | 0,165995776 | 3,711510851 | 0,000206026 | 0,004263946 | 1,532721016 |
| CABIN1    | 264,8602456 | 284,0152643 | 301,7990017 | 372,9149267 | 478,0388863  | 519,8523135 | 293,7617501 | 0,686847389 | 0,185154586 | 3,709588864 | 0,000207596 | 0,004283873 | 1,609761983 |
| LOX       | 38,08447976 | 47,33587738 | 36,87137125 | 95,03315873 | 96,5050287   | 73,39091485 | 133,339309  | 1,111498776 | 0,299651146 | 3,709309273 | 0,000207825 | 0,004283873 | 2,160699999 |
| LSM11     | 24,23557803 | 22,35305321 | 32,77455222 | 57,74166607 | 66,20726359  | 74,61409676 | 46,55010332 | 1,319436593 | 0,355934813 | 3,706961342 | 0,000209761 | 0,004315851 | 2,495686281 |
| MMD       | 425,8537282 | 515,4351092 | 352,3264364 | 588,2432231 | 742,8679407  | 842,7723388 | 687,8988756 | 0,748300508 | 0,202050918 | 3,703524419 | 0,000212625 | 0,004366775 | 1,679812848 |
| FAM160B1  | 46,74004334 | 85,46755638 | 135,1950279 | 190,0663175 | 212,0876749  | 240,9668371 | 128,853023  | 1,255811602 | 0,339215349 | 3,702107247 | 0,000213816 | 0,004375248 | 2,388014509 |
| PHK8      | 178,3046098 | 205,1221353 | 289,5085446 | 340,4352395 | 409,5873087  | 503,9509486 | 214,1602097 | 0,894429003 | 0,241577499 | 3,702451621 | 0,000213526 | 0,004375248 | 1,858874025 |
| HIPK2     | 1440,28578  | 1922,362576 | 1760,266576 | 2788,44129  | 2426,103456  | 2465,934739 | 1419,56532  | 0,583210474 | 0,157679498 | 3,698708342 | 0,000216699 | 0,004426184 | 1,498179487 |
| PRMT6     | 238,8935549 | 245,8835853 | 244,4435353 | 371,7119753 | 366,9453423  | 347,3836636 | 296,0846074 | 0,574105883 | 0,155351627 | 3,695525397 | 0,000219433 | 0,004470382 | 1,488754515 |
| TRIM6     | 115,984552  | 76,263358   | 105,1516884 | 153,9777762 | 252,4853273  | 260,5377477 | 83,33121789 | 1,170142928 | 0,316660239 | 3,695263194 | 0,000219659 | 0,004470382 | 2,250339899 |
| NAAA      | 39,81559248 | 36,81679352 | 53,25864736 | 81,80069359 | 89,77256081  | 117,4254638 | 118,6522984 | 1,150197461 | 0,311870835 | 3,688057148 | 0,000225973 | 0,004578927 | 2,219442697 |
| RAP1A     | 290,8269363 | 389,2061029 | 421,9723599 | 688,0881873 | 705,8367593  | 604,2518656 | 500,1933789 | 0,856118142 | 0,232102334 | 3,68853741  | 0,000225547 | 0,004578927 | 1,810161154 |
| HKDC1     | 685,5206357 | 478,6183157 | 576,2858766 | 885,372213  | 885,3818809  | 1136,335998 | 416,1925332 | 0,742035916 | 0,201260256 | 3,686947102 | 0,000226961 | 0,004585745 | 1,672534437 |

|           |             |             |             |             |             |             |             |             |             |             |             |             |             |
|-----------|-------------|-------------|-------------|-------------|-------------|-------------|-------------|-------------|-------------|-------------|-------------|-------------|-------------|
| PTPLB     | 351,4158814 | 491,7671705 | 479,3278263 | 648,3907919 | 708,0810734 | 673,9732347 | 478,3486809 | 0,614555051 | 0,167034957 | 3,679200222 | 0,000233967 | 0,004701932 | 1,531085715 |
| C1orf116  | 15,58001445 | 18,40839676 | 19,1184888  | 60,14756882 | 51,61922246 | 51,37364039 | 29,27867185 | 1,611939247 | 0,439428766 | 3,668260638 | 0,000244206 | 0,004881516 | 3,056624321 |
| CAP2      | 474,3248843 | 541,7328189 | 573,5546639 | 696,5088469 | 834,8848155 | 817,0855186 | 470,3590801 | 0,561219525 | 0,153323282 | 3,660367291 | 0,000251854 | 0,004989996 | 1,475515959 |
| PODXL     | 180,0357225 | 165,6755708 | 151,582304  | 295,9260386 | 278,2949385 | 305,7954785 | 1031,513989 | 0,825474021 | 0,225878255 | 3,654508576 | 0,000257675 | 0,005087384 | 1,7721172   |
| EZF5      | 228,5068786 | 239,3091579 | 301,7990017 | 507,6454808 | 454,4735891 | 433,0063976 | 189,2168075 | 0,85654657  | 0,234568471 | 3,651584395 | 0,000260627 | 0,005136646 | 1,810698785 |
| GADD45B   | 225,0446531 | 185,3988531 | 143,388666  | 271,8670111 | 318,6925909 | 321,6968434 | 239,9120165 | 0,726801434 | 0,199096474 | 3,650498773 | 0,000261732 | 0,005149374 | 1,654965835 |
| LBR       | 1551,076994 | 1513,433191 | 1705,642322 | 2244,707268 | 2049,0587   | 2458,595647 | 1251,946396 | 0,501070446 | 0,13731358  | 3,649096069 | 0,000263165 | 0,005161756 | 1,415263266 |
| UHRF1BP1L | 107,3289884 | 143,3225176 | 167,9695801 | 245,4020808 | 256,9739553 | 266,6536573 | 210,1342175 | 0,87085248  | 0,238656175 | 3,648983643 | 0,00026328  | 0,005161756 | 1,828743175 |
| USP37     | 84,8245231  | 122,2843499 | 147,485485  | 224,9519074 | 186,2780637 | 288,6709317 | 189,2804766 | 0,972560397 | 0,26728156  | 3,638711169 | 0,000274006 | 0,005325575 | 1,962320098 |
| AP4E1     | 50,20226877 | 82,83778541 | 144,7542723 | 199,6899285 | 185,1559067 | 218,9495626 | 143,2088355 | 1,108459896 | 0,304943156 | 3,634972208 | 0,000278011 | 0,005347896 | 2,156153509 |
| DANCR     | 839,5896674 | 703,4637333 | 662,3190762 | 999,6525938 | 1217,540356 | 1034,811899 | 1059,993702 | 0,562575515 | 0,154765487 | 3,635019186 | 0,00027796  | 0,005347896 | 1,47690345  |
| PSMD1     | 2390,666661 | 2523,265241 | 2062,065577 | 3133,688335 | 3632,422242 | 3815,10439  | 2569,519638 | 0,601100258 | 0,165757421 | 3,626385198 | 0,000287417 | 0,005463345 | 1,516872955 |
| REL       | 110,7912138 | 120,9694644 | 167,9695801 | 253,8227404 | 210,9655179 | 227,511836  | 150,4014686 | 0,786594532 | 0,217018218 | 3,624555292 | 0,000289459 | 0,005474383 | 1,724997811 |
| TAF2      | 328,9114161 | 356,3339658 | 494,349496  | 629,1435698 | 675,5385201 | 792,6218804 | 461,4961968 | 0,828427697 | 0,228549549 | 3,624718142 | 0,000289277 | 0,005474383 | 1,775749029 |
| SYNRG     | 574,7294218 | 798,135488  | 695,0936284 | 1086,265093 | 1106,446812 | 956,5282568 | 1137,408727 | 0,604634946 | 0,166998585 | 3,620599228 | 0,000293921 | 0,005532564 | 1,52059394  |
| TMEM192   | 167,9179335 | 211,6965627 | 297,7021827 | 371,7119753 | 386,0220115 | 366,9545742 | 258,4958462 | 0,725653804 | 0,200437694 | 3,620345993 | 0,000294209 | 0,005532564 | 1,653649871 |
| PATL1     | 1300,06565  | 1316,200368 | 1607,318665 | 2077,497027 | 2288,078144 | 2321,599273 | 1543,422994 | 0,662598328 | 0,183342468 | 3,613992633 | 0,000301518 | 0,005645415 | 1,582930955 |
| KITLG     | 74,4378468  | 128,8587773 | 120,1733582 | 232,1696156 | 168,3235515 | 193,2627424 | 108,3663826 | 0,863730392 | 0,239156474 | 3,611570185 | 0,000304349 | 0,00567949  | 1,819737548 |
| TCF4      | 180,0357225 | 199,8625934 | 240,3467163 | 325,999823  | 355,7237722 | 489,2727657 | 306,490245  | 0,914332834 | 0,253337246 | 3,609152809 | 0,000307199 | 0,005723166 | 1,884697303 |
| GNGL2     | 3050,220606 | 3619,879734 | 3758,148655 | 4302,957073 | 5409,918946 | 5181,398588 | 4275,868975 | 0,51386393  | 0,142426568 | 3,607921863 | 0,000308659 | 0,005739916 | 1,427869302 |
| RPL6      | 10487,08084 | 11079,22508 | 10415,47958 | 14123,85211 | 16867,14202 | 17778,94912 | 17189,06471 | 0,608726022 | 0,168737373 | 3,607535251 | 0,00030912  | 0,005739916 | 1,524912035 |
| ZNF33A    | 162,7245953 | 169,6202273 | 202,1097387 | 306,752601  | 300,7380787 | 244,6363828 | 186,6830841 | 0,670760941 | 0,186123814 | 3,603842656 | 0,000313547 | 0,005786845 | 1,59191239  |
| YTHDF3    | 308,1380635 | 610,106864  | 654,1254381 | 968,375858  | 1063,804846 | 826,870974  | 656,6011342 | 0,859289462 | 0,238490541 | 3,603033727 | 0,000314525 | 0,005792411 | 1,814144611 |
| TNS1      | 441,4337427 | 295,8492336 | 248,5403544 | 505,2395781 | 592,4989013 | 708,2223282 | 700,0650078 | 0,877580619 | 0,243856756 | 3,598754582 | 0,000319745 | 0,005878908 | 1,635291602 |
| C11orf57  | 245,8180057 | 261,6622111 | 304,5302144 | 415,0182249 | 364,7010283 | 435,4527614 | 362,0430478 | 0,578187874 | 0,160780157 | 3,596139513 | 0,000322975 | 0,005918918 | 1,492972792 |
| FAM73A    | 24,23557803 | 36,81679352 | 49,16182834 | 80,59774222 | 59,47432153 | 118,6486457 | 94,75174641 | 1,212298976 | 0,337336941 | 3,593733233 | 0,000325974 | 0,005964149 | 2,317065739 |
| HBP1      | 225,0446531 | 169,6202273 | 254,0027797 | 359,6824615 | 371,4339703 | 335,1518445 | 381,6936056 | 0,719145622 | 0,200143373 | 3,593152297 | 0,000326702 | 0,005967748 | 1,646206846 |
| NTN4      | 41,54670519 | 18,40839676 | 30,04333954 | 61,3505202  | 84,16177576 | 92,96182547 | 59,14699324 | 1,425415219 | 0,397098554 | 3,589575448 | 0,000331217 | 0,00602086  | 2,685917923 |
| GPR126    | 46,74004334 | 76,263358   | 73,7427425  | 109,4685753 | 126,8037421 | 133,3268286 | 134,5098048 | 0,894290306 | 0,249296777 | 3,58725178  | 0,000334182 | 0,006055155 | 1,858695327 |
| ADAMTS12  | 353,1469941 | 270,8664094 | 330,4767349 | 434,2654469 | 503,8484975 | 495,3886752 | 840,4301033 | 0,59040005  | 0,164803872 | 3,582440415 | 0,000340399 | 0,006151773 | 1,5056642   |
| PROSER1   | 408,5426011 | 582,4942688 | 512,1023785 | 739,8150965 | 731,6463706 | 967,5368941 | 494,0620513 | 0,695466281 | 0,1941658   | 3,58181658  | 0,000341213 | 0,006152794 | 1,619407744 |
| PRPF39    | 121,1778901 | 124,9141209 | 94,22683764 | 209,3135395 | 169,4457085 | 210,3872892 | 142,6080672 | 0,792810083 | 0,221422396 | 3,580532496 | 0,000342895 | 0,006163326 | 1,732445638 |
| PSMA4     | 1319,10789  | 1672,534334 | 2236,863189 | 3140,906044 | 2738,063105 | 2607,823841 | 2496,895288 | 0,697951314 | 0,195054963 | 3,578228936 | 0,00034593  | 0,006207958 | 1,622199567 |
| MGC12916  | 34,62225433 | 47,33587738 | 60,08667908 | 90,22135323 | 99,8719739  | 105,1936446 | 55,8182394  | 1,042455435 | 0,291405328 | 3,577338285 | 0,000347111 | 0,006219207 | 2,059730287 |
| GPR180    | 121,1778901 | 272,1812949 | 258,0995988 | 439,0772524 | 432,0304489 | 511,2900401 | 232,0692335 | 1,079704253 | 0,30228309  | 3,571831466 | 0,000354494 | 0,006301234 | 2,113602756 |
| TMEM14C   | 339,2980924 | 552,2519027 | 484,7902516 | 765,0770754 | 703,5924453 | 867,2359771 | 675,5246362 | 0,759676134 | 0,212676322 | 3,571982657 | 0,000354289 | 0,006301234 | 1,693110502 |
| PTCD3     | 784,1940605 | 673,2213671 | 740,1586377 | 1021,305719 | 1024,52935  | 973,6528036 | 1094,976405 | 0,46004747  | 0,128923219 | 3,568383354 | 0,000359191 | 0,006364587 | 1,37558708  |
| SLCO1B3   | 19,04223988 | 48,65076286 | 49,16182834 | 93,83020736 | 78,55099071 | 101,5240989 | 41,3547343  | 1,203358952 | 0,337734858 | 3,563028581 | 0,000366601 | 0,00647546  | 2,302751851 |
| ZFP1      | 93,48008668 | 72,31870155 | 86,03319959 | 155,1807276 | 145,8804113 | 145,5586478 | 91,30272504 | 0,83264073  | 0,233811225 | 3,561166616 | 0,000369211 | 0,006511323 | 1,780942243 |
| E1FAA2    | 1772,659422 | 1884,230897 | 1560,88805  | 2262,751539 | 2602,282106 | 2655,527936 | 2316,573178 | 0,527474585 | 0,148241494 | 3,558211465 | 0,000373389 | 0,006554138 | 1,441403831 |
| TPR       | 1556,270332 | 1713,295784 | 1783,481884 | 2262,751539 | 2607,892891 | 2286,126998 | 1587,235561 | 0,501717178 | 0,141475876 | 3,546309045 | 0,000390668 | 0,006804282 | 1,415897843 |
| PAPSS2    | 171,3801589 | 188,028624  | 236,2498973 | 324,7968716 | 302,9823927 | 338,8213902 | 181,919937  | 0,694349023 | 0,196049338 | 3,541705516 | 0,000397549 | 0,006913415 | 1,61815412  |
| NTPCR     | 337,5669797 | 324,7767142 | 237,6155036 | 441,4831551 | 441,007705  | 503,9509486 | 413,8688372 | 0,625929289 | 0,176780941 | 3,540705713 | 0,000399058 | 0,006928937 | 1,543204536 |
| GNAO1     | 13,84890173 | 9,204198379 | 9,559244399 | 32,47968716 | 30,29823927 | 24,46363828 | 50,53528559 | 1,448091126 | 0,409148764 | 3,539277767 | 0,000401223 | 0,006955778 | 2,728468004 |
| RAB3B     | 301,2136126 | 424,7080109 | 385,1009886 | 600,2727368 | 552,101249  | 615,2605028 | 457,4020341 | 0,666091567 | 0,188437303 | 3,534817974 | 0,000408056 | 0,007052466 | 1,586768394 |
| CAMSAP2   | 79,63118495 | 197,2328224 | 359,1544681 | 547,3428763 | 474,6724153 | 704,5527825 | 369,5612755 | 1,436490806 | 0,406875969 | 3,53053735  | 0,000414716 | 0,007134647 | 2,7066171   |
| DDX17     | 1106,181026 | 1300,421742 | 2122,152256 | 2743,93209  | 2665,122899 | 3219,414798 | 1719,014364 | 0,929391809 | 0,263888753 | 3,521907612 | 0,000428453 | 0,007326097 | 1,904472966 |
| NOP16     | 495,0982369 | 619,3110624 | 499,8119214 | 814,3980818 | 737,2571556 | 848,8882484 | 872,3148032 | 0,570601514 | 0,161999868 | 3,522234433 | 0,000427926 | 0,007326097 | 1,485142654 |
| RAN       | 4377,98406  | 3857,874006 | 4750,944466 | 6272,188476 | 5620,884463 | 5637,645442 | 4786,38512  | 0,432918867 | 0,122982866 | 3,52015596  | 0,000431293 | 0,007363445 | 1,349962065 |
| MGEA5     | 988,465361  | 1245,196552 | 1189,443124 | 1771,947377 | 1738,221209 | 1847,00469  | 1556,801137 | 0,64522079  | 0,183400552 | 3,518096228 | 0,000434655 | 0,007409577 | 1,563978619 |

|           |             |             |             |             |             |             |             |             |             |             |             |             |             |
|-----------|-------------|-------------|-------------|-------------|-------------|-------------|-------------|-------------|-------------|-------------|-------------|-------------|-------------|
| DLC1      | 924,4141905 | 736,3358703 | 600,8667908 | 1352,117347 | 1209,685257 | 1631,724673 | 1035,697949 | 0,891839747 | 0,253587615 | 3,516889993 | 0,000436635 | 0,007432052 | 1,85554083  |
| CREBBP    | 882,8674853 | 698,2041913 | 813,9013802 | 1077,844433 | 1250,082909 | 1289,233737 | 985,4073484 | 0,596156995 | 0,16958179  | 3,515454069 | 0,000439003 | 0,007461053 | 1,511684421 |
| KAT7      | 1544,152543 | 1819,801508 | 1469,392425 | 2100,353103 | 2680,833097 | 3067,740241 | 2566,130781 | 0,699237986 | 0,199149035 | 3,511129176 | 0,000446208 | 0,007560626 | 1,623646976 |
| BRWD3     | 38,08447976 | 46,02099189 | 68,28031713 | 99,84496424 | 97,62765988 | 97,85455313 | 69,33863159 | 0,941869919 | 0,268581088 | 3,506836342 | 0,000453468 | 0,007651569 | 1,921016511 |
| TNRC6A    | 183,4979479 | 294,5343481 | 299,067789  | 398,1769056 | 387,1441685 | 461,1395816 | 386,6944648 | 0,673982423 | 0,192255328 | 3,50566317  | 0,000455471 | 0,007659826 | 1,595471041 |
| INSR      | 15,58001445 | 21,03816772 | 10,92485074 | 32,47968716 | 50,49706545 | 42,81136699 | 37,8480451  | 1,400959327 | 0,399877275 | 3,503473229 | 0,000459233 | 0,007697391 | 2,640771231 |
| SLC35D1   | 76,16895952 | 86,78244186 | 86,03319959 | 138,3394083 | 151,4911964 | 124,7645552 | 115,6862471 | 0,731942999 | 0,20893749  | 3,503167377 | 0,00045976  | 0,007697391 | 1,660874425 |
| TMEM45A   | 22,50446531 | 31,55725159 | 21,84970148 | 49,32100643 | 62,84079256 | 77,06046059 | 32,65952366 | 1,309120766 | 0,374338144 | 3,497161019 | 0,000470238 | 0,00786109  | 2,477904809 |
| B2M       | 8394,165562 | 7973,465567 | 8576,007832 | 10454,85041 | 11194,63833 | 11451,42908 | 9185,353037 | 0,408233754 | 0,116917336 | 3,491644329 | 0,000480057 | 0,007989571 | 1,327060141 |
| SNX14     | 221,5824277 | 314,2576304 | 415,1443282 | 518,4720432 | 565,5671331 | 702,1064187 | 423,3285041 | 0,905935272 | 0,259522717 | 3,490774462 | 0,000481623 | 0,00800377  | 1,873758823 |
| ABCA11P   | 122,9090029 | 186,7137385 | 211,6689831 | 333,2175313 | 262,5847404 | 299,679569  | 202,1287104 | 0,772172566 | 0,221386245 | 3,487897662 | 0,000486834 | 0,00807843  | 1,707839698 |
| METTL14   | 39,81559248 | 67,05915962 | 68,28031713 | 109,4685753 | 134,6588412 | 112,5327361 | 95,62564864 | 1,012581766 | 0,290460544 | 3,486125004 | 0,000490072 | 0,00812016  | 2,017518309 |
| TPM1      | 2241,790968 | 2504,856845 | 3934,311873 | 5527,561574 | 4671,539633 | 4383,88398  | 5789,920111 | 0,747981869 | 0,215032184 | 3,478464739 | 0,000504295 | 0,008292967 | 1,67944188  |
| PRKAB2    | 57,12671964 | 78,89312896 | 43,69940296 | 139,5423597 | 118,9486431 | 99,07773504 | 67,01088974 | 0,988653556 | 0,284371513 | 3,476626563 | 0,000507765 | 0,008327338 | 1,984332181 |
| TAF15     | 2802,671488 | 3201,74615  | 3842,816248 | 4711,960541 | 4908,314762 | 5297,60087  | 3902,034881 | 0,598887344 | 0,172520854 | 3,471391029 | 0,000517769 | 0,008454392 | 1,514548044 |
| C21orf7   | 124,6401156 | 117,024808  | 92,8612313  | 188,8633661 | 172,8121796 | 248,3059286 | 152,771516  | 0,869167021 | 0,250416681 | 3,470883084 | 0,00051875  | 0,008458106 | 1,826607954 |
| MAP3K2    | 244,086893  | 235,3645014 | 170,7007928 | 327,2027744 | 343,3800451 | 440,3454891 | 381,640529  | 0,774948055 | 0,223473758 | 3,46773626  | 0,000524862 | 0,008545364 | 1,71112844  |
| COPS2     | 1223,89669  | 1112,393118 | 1403,84332  | 1970,434355 | 1687,724143 | 1855,566964 | 1881,172664 | 0,559818998 | 0,161465457 | 3,467113091 | 0,000526081 | 0,008552805 | 1,474084266 |
| VCL       | 148,8756936 | 127,5438918 | 102,4204757 | 228,5607615 | 209,8433609 | 335,1518445 | 112,8628791 | 1,032863408 | 0,298305697 | 3,462432728 | 0,000535316 | 0,008652859 | 2,04608121  |
| C20orf194 | 38,08447976 | 22,35305321 | 47,79622199 | 81,80069359 | 63,96294957 | 88,06909782 | 55,6208213  | 1,015763928 | 0,322296848 | 3,461913872 | 0,000536349 | 0,008657101 | 2,167097297 |
| WASF3     | 1,731112716 | 6,574427414 | 12,29045708 | 22,85607615 | 20,19882618 | 25,6868202  | 73,90080875 | 1,670128827 | 0,483345043 | 3,455355236 | 0,000549568 | 0,008819785 | 3,1824301   |
| TUBD1     | 57,12671964 | 53,91030479 | 60,08667908 | 110,6715266 | 89,77256081 | 146,7818297 | 141,303056  | 1,019469639 | 0,295362564 | 3,451587174 | 0,0005573   | 0,008880432 | 2,027173597 |
| NUDT9     | 276,9780346 | 236,6793869 | 284,0461193 | 419,8300304 | 411,8316227 | 431,7832157 | 268,702543  | 0,664667299 | 0,19260381  | 3,450956135 | 0,000558604 | 0,008888614 | 1,585202667 |
| CLDN1     | 2371,624421 | 3593,582024 | 2874,601351 | 4381,148913 | 4613,14768  | 4193,067602 | 4668,751279 | 0,576437953 | 0,16719645  | 3,447668613 | 0,000565447 | 0,008972084 | 1,491162984 |
| ATP6V0A1  | 323,718078  | 295,8492336 | 229,4218656 | 445,0920093 | 637,3851817 | 390,1950306 | 498,1165325 | 0,797470986 | 0,231433055 | 3,445795532 | 0,000569381 | 0,009009051 | 1,738051686 |
| ANXA4     | 391,2314739 | 557,5114447 | 600,8667908 | 830,0364497 | 901,0920791 | 1289,233737 | 559,3288587 | 0,961192447 | 0,2793895   | 3,44033132  | 0,000581002 | 0,009166926 | 1,946918438 |
| DAAM1     | 36,35336704 | 49,96564834 | 53,25864736 | 84,20659635 | 77,42883369 | 84,39955207 | 217,2234769 | 0,799965259 | 0,232509994 | 3,440562898 | 0,000580505 | 0,009166926 | 1,741059201 |
| UBE2V1    | 50,20226877 | 55,22519027 | 51,89304102 | 91,4243046  | 104,3606019 | 124,7645552 | 157,6254464 | 1,024158747 | 0,297757133 | 3,439577539 | 0,000582623 | 0,009166926 | 2,03377312  |
| PSMC6     | 1810,743901 | 1776,410287 | 1887,267966 | 2691,002229 | 2619,114462 | 2867,138407 | 2246,800014 | 0,578854708 | 0,168380668 | 3,437774146 | 0,000586517 | 0,009202414 | 1,493663025 |
| EGFR      | 2373,355534 | 2395,72135  | 1560,88805  | 2865,430179 | 4146,370152 | 4205,299421 | 4781,96567  | 0,825660195 | 0,240486247 | 3,433294861 | 0,000596293 | 0,009342759 | 1,7723459   |
| CD109     | 337,5669797 | 535,1583915 | 555,8017815 | 773,497735  | 801,2201052 | 714,3382379 | 455,770515  | 0,676450067 | 0,197223767 | 3,429860804 | 0,000603891 | 0,009448623 | 1,598202335 |
| KIF11     | 129,8334537 | 218,2709901 | 210,3033768 | 255,0256918 | 379,2890694 | 486,8264018 | 295,6652992 | 1,000708836 | 0,291868565 | 3,42862835  | 0,00060664  | 0,009464942 | 2,000982897 |
| PAM       | 472,5937716 | 453,6354915 | 469,7685819 | 660,4203056 | 680,0271481 | 824,4246101 | 433,3724556 | 0,633056795 | 0,184736079 | 3,42681732  | 0,0006107   | 0,009476201 | 1,550847465 |
| PTK2      | 489,9048987 | 827,0629686 | 867,1600276 | 1153,63037  | 1218,662513 | 1734,471954 | 1124,465762 | 0,909225682 | 0,265327084 | 3,426810663 | 0,000610715 | 0,009476201 | 1,878037255 |
| PLEKHA3   | 299,4824999 | 284,0152643 | 309,9926398 | 423,4388845 | 574,5443892 | 473,3714008 | 383,2994122 | 0,720302494 | 0,210372501 | 3,423938438 | 0,000617206 | 0,009563714 | 1,64752744  |
| DKK3      | 1030,012066 | 721,87213   | 893,1065481 | 1253,475334 | 1256,815851 | 1237,860097 | 3034,301065 | 0,505320838 | 0,147650249 | 3,422417797 | 0,000620669 | 0,009590117 | 1,419438988 |
| NEAT1     | 251,0113439 | 311,6278594 | 206,2065577 | 404,1916625 | 506,0928115 | 554,1014071 | 428,0019279 | 0,928898271 | 0,271551863 | 3,420702992 | 0,000624595 | 0,00959877  | 1,903821568 |
| ARHGAP18  | 936,5319795 | 999,3129669 | 807,0733485 | 1344,899639 | 1332,000371 | 1220,73555  | 744,67921   | 0,507093244 | 0,148983429 | 3,403688906 | 0,000664824 | 0,010051999 | 1,421183894 |
| CRAT      | 152,337919  | 181,4541966 | 195,281707  | 239,3873239 | 305,2267067 | 330,2591168 | 203,1521337 | 0,721729269 | 0,212000119 | 3,404381438 | 0,000663141 | 0,010051999 | 1,649157594 |
| MCTP1     | 173,1112716 | 194,6030514 | 199,378526  | 307,9555524 | 292,8829796 | 473,3714008 | 200,1798683 | 0,919576787 | 0,270142004 | 3,404049618 | 0,000663947 | 0,010051999 | 1,891560325 |
| GTPBP8    | 86,55563582 | 140,6927467 | 122,9045708 | 184,0515606 | 212,0876749 | 190,8163786 | 148,7211343 | 0,734580384 | 0,216063385 | 3,399837429 | 0,000674259 | 0,010153658 | 1,66391344  |
| RAB30     | 50,20226877 | 60,4847322  | 35,50576491 | 101,0479156 | 86,40608978 | 143,112284  | 75,46665616 | 1,175494697 | 0,345940427 | 3,397968573 | 0,000678882 | 0,010209588 | 2,258703182 |
| ANKRD10   | 110,7912138 | 98,6164112  | 125,6357835 | 184,0515606 | 166,0792375 | 192,0395605 | 104,29572   | 0,694077913 | 0,204528216 | 3,393555801 | 0,000689915 | 0,010347804 | 1,617850066 |
| FBX17     | 50,20226877 | 51,28053383 | 73,7427425  | 107,0626725 | 108,84923   | 95,4081893  | 85,3043646  | 0,822962188 | 0,242491298 | 3,393780292 | 0,00068935  | 0,010347804 | 1,769034505 |
| FXR1      | 1121,76104  | 1546,305328 | 1984,226016 | 2449,209002 | 2445,180125 | 2584,583385 | 2106,40238  | 0,683830274 | 0,201870611 | 3,387468198 | 0,000705409 | 0,01052399  | 1,606398997 |
| TMEM56    | 126,3712283 | 168,3053418 | 200,7441324 | 267,0552056 | 270,4398394 | 297,2332051 | 122,1794482 | 0,745887222 | 0,220219425 | 3,387018299 | 0,000706567 | 0,010527282 | 1,67700527  |
| NEK4      | 313,3314017 | 314,2576304 | 356,4232554 | 472,7598909 | 435,3969199 | 492,9423114 | 413,3558383 | 0,508201435 | 0,150131161 | 3,385049658 | 0,000711654 | 0,010589031 | 1,422275981 |
| GCNT1     | 188,6912861 | 207,7519063 | 238,98111   | 298,3319413 | 340,0135741 | 346,1604817 | 171,8833574 | 0,628573481 | 0,185761061 | 3,383774174 | 0,000714968 | 0,010617051 | 1,546035537 |
| SERTAD4   | 67,51339594 | 111,765266  | 121,5389645 | 200,8928799 | 172,8121796 | 207,9409254 | 90,06838424 | 0,94106819  | 0,278126488 | 3,383597867 | 0,000715427 | 0,010617051 | 1,919949268 |
| CDC25B    | 893,2541616 | 963,8110588 | 701,9216601 | 1196,936619 | 1179,387018 | 1421,337384 | 1600,992013 | 0,569668183 | 0,168608911 | 3,378636263 | 0,000728463 | 0,010782023 | 1,484182172 |



|          |             |             |             |             |             |             |             |             |             |             |             |             |             |
|----------|-------------|-------------|-------------|-------------|-------------|-------------|-------------|-------------|-------------|-------------|-------------|-------------|-------------|
| PPARG    | 112,5223266 | 98,6164112  | 161,1415484 | 221,3430533 | 245,7523852 | 327,812753  | 100,6985807 | 1,093015576 | 0,32403922  | 3,373096551 | 0,000743279 | 0,010943636 | 2,133194592 |
| RPL22L1  | 559,1494074 | 873,0839605 | 1341,025428 | 1885,024807 | 1588,974326 | 2261,663359 | 825,0649402 | 1,047265904 | 0,310556402 | 3,37222449  | 0,000745636 | 0,010963979 | 2,066609639 |
| CDC37L1  | 83,09341038 | 84,15267089 | 133,8294216 | 173,2249982 | 160,4684524 | 232,4045637 | 150,7267181 | 0,905573433 | 0,268811883 | 3,368799855 | 0,000754962 | 0,011072123 | 1,87328893  |
| SLC18B1  | 65,78228322 | 80,20801445 | 83,3019869  | 135,9335055 | 115,582172  | 146,7818297 | 107,9648297 | 0,788152271 | 0,234252228 | 3,364545463 | 0,000766699 | 0,011229584 | 1,726861371 |
| LAPTM4B  | 2731,695866 | 2834,893101 | 2742,137536 | 3306,913334 | 4472,917842 | 4793,649921 | 2966,652578 | 0,597651001 | 0,178474864 | 3,34865644  | 0,000812044 | 0,011755805 | 1,513250682 |
| PMAIP1   | 432,7781791 | 345,814882  | 342,767192  | 680,870479  | 599,2318434 | 570,002772  | 523,6752067 | 0,724595685 | 0,216474788 | 3,347252089 | 0,00081617  | 0,01177436  | 1,652437476 |
| PNRC2    | 1402,2013   | 1793,503798 | 2313,337144 | 2579,127751 | 2934,440581 | 3629,180739 | 3137,013139 | 0,730150267 | 0,218206328 | 3,346146169 | 0,000819432 | 0,011786809 | 1,65881186  |
| C12orf4  | 70,97562137 | 94,67175476 | 150,2166977 | 197,2840257 | 191,8888487 | 178,5845595 | 127,8840144 | 0,835910224 | 0,249882197 | 3,345217204 | 0,000822182 | 0,011811237 | 1,784982863 |
| CCDC80   | 34,62225433 | 43,39122093 | 66,91471079 | 115,4833321 | 94,26118885 | 100,300917  | 41,17485833 | 1,085827771 | 0,324784582 | 3,343224501 | 0,000828109 | 0,011881193 | 2,122593008 |
| RCN2     | 486,4426733 | 422,07824   | 639,1037684 | 775,9036378 | 746,2344117 | 903,9314345 | 854,797037  | 0,647995816 | 0,194207605 | 3,336614019 | 0,000848056 | 0,012136389 | 1,566989829 |
| RAB3GAP1 | 557,4182947 | 518,0648802 | 538,048899  | 779,5124919 | 818,0524603 | 1067,837811 | 685,1927209 | 0,724349636 | 0,217157431 | 3,335596811 | 0,000851165 | 0,012149922 | 1,65215568  |
| PTPN13   | 221,5824277 | 344,4999965 | 529,8552609 | 656,8814515 | 641,8738098 | 618,6096175 | 324,0971361 | 1,013770161 | 0,303999294 | 3,334854799 | 0,000853439 | 0,012158068 | 2,019180889 |
| EIF2C4   | 79,63118495 | 90,72709831 | 111,9797201 | 159,9925331 | 152,6133534 | 176,1381956 | 133,43749   | 0,785089632 | 0,235504026 | 3,333656953 | 0,000857123 | 0,012188506 | 1,723199376 |
| WRN      | 133,2956792 | 216,9561046 | 258,0995988 | 316,376212  | 369,1896563 | 523,5218592 | 339,1749515 | 0,986086714 | 0,296025115 | 3,331091396 | 0,000865062 | 0,012285848 | 1,980804798 |
| NAP1L5   | 3,462225433 | 10,51908386 | 19,1184888  | 62,55347157 | 25,80961123 | 46,48091274 | 21,97287905 | 1,992399397 | 0,599128158 | 3,32549784  | 0,000882608 | 0,012487678 | 3,978982067 |
| TMEM229B | 31,16002889 | 17,09351128 | 24,58091417 | 55,33576331 | 51,61922246 | 47,70409467 | 80,34487798 | 1,109739797 | 0,333998757 | 3,322586604 | 0,00089187  | 0,012570275 | 2,158067212 |
| TLR3     | 0           | 15,77862579 | 31,40894588 | 52,92986056 | 51,61922246 | 62,38227762 | 24,28812284 | 1,779901925 | 0,53619832  | 3,319484337 | 0,000901839 | 0,012648259 | 3,434028292 |
| EPS8L2   | 266,5913583 | 414,1889271 | 409,6819028 | 594,2579799 | 607,0869424 | 522,2986773 | 434,4384111 | 0,656064028 | 0,197877947 | 3,315498454 | 0,000914798 | 0,012798065 | 1,575777704 |
| TMEM123  | 2755,931444 | 4137,944614 | 4412,274093 | 5591,317997 | 6184,207283 | 6854,711447 | 4244,070441 | 0,720147524 | 0,217330664 | 3,313602929 | 0,000921022 | 0,012837173 | 1,647350477 |
| FECH     | 896,7163871 | 591,6984672 | 453,3813058 | 929,8814139 | 1135,622894 | 1235,413733 | 690,0032794 | 0,76821056  | 0,203899306 | 3,312690205 | 0,000924033 | 0,012863176 | 1,703155971 |
| STK38    | 238,8935549 | 220,9007611 | 344,1327983 | 452,3097175 | 387,1441685 | 401,2036678 | 288,2004587 | 0,623779334 | 0,18841868  | 3,310602402 | 0,000930954 | 0,012943484 | 1,540906511 |
| SLAIN2   | 682,0584102 | 662,7022833 | 744,2554567 | 992,4348855 | 1245,594281 | 1427,453294 | 1146,38197  | 0,811084412 | 0,245166517 | 3,308298999 | 0,000938645 | 0,013034292 | 1,754529424 |
| AHCYL1   | 2156,966445 | 1922,362576 | 1951,451464 | 2624,839903 | 3145,406099 | 3587,592554 | 2328,262747 | 0,634075116 | 0,191852806 | 3,305008293 | 0,000949736 | 0,013155774 | 1,551942511 |
| SAT1     | 145,4134682 | 138,0629757 | 208,9377704 | 252,619789  | 309,7133348 | 321,6968434 | 172,7345224 | 0,842377168 | 0,2485465   | 3,305323914 | 0,000948667 | 0,013155774 | 1,793002087 |
| ZNF227   | 157,5312572 | 143,3225176 | 139,291847  | 221,3430533 | 302,9823927 | 222,6191084 | 239,0340239 | 0,766251135 | 0,232007799 | 3,302695596 | 0,000957603 | 0,013248411 | 1,700844367 |
| RSPRY1   | 386,0381357 | 403,6698432 | 443,8220614 | 624,3317643 | 553,223406  | 722,9005113 | 362,5836719 | 0,622219504 | 0,188487962 | 3,301110034 | 0,000963031 | 0,013290775 | 1,539241395 |
| ADAMTS9  | 315,0625144 | 330,0362562 | 345,4984047 | 505,2395781 | 451,107118  | 585,9041369 | 336,400754  | 0,637348792 | 0,193117958 | 3,300308255 | 0,000965787 | 0,013296139 | 1,555468083 |
| ADAMTSL3 | 72,70673409 | 73,63358703 | 98,32365667 | 122,7010404 | 187,4002207 | 146,7818297 | 125,8271373 | 0,898963351 | 0,272368585 | 3,300539786 | 0,00096499  | 0,013296139 | 1,864725602 |
| TBCE     | 237,1624421 | 298,4790046 | 290,874151  | 470,3539882 | 372,5561273 | 401,2036678 | 338,7240323 | 0,585672188 | 0,177580968 | 3,298057183 | 0,000973563 | 0,013354099 | 1,500738058 |
| BNIP3    | 4409,144089 | 3598,841566 | 2725,75026  | 5967,841778 | 7627,301197 | 4934,315842 | 3195,69817  | 0,787987127 | 0,239127507 | 3,29525924  | 0,000983309 | 0,013379283 | 1,72666371  |
| SEC14L1  | 1171,963309 | 1167,618309 | 1054,248097 | 1619,172553 | 1448,7047   | 1992,563338 | 1842,523566 | 0,576368378 | 0,174925184 | 3,29494224  | 0,000984419 | 0,013379283 | 1,491091073 |
| SCO1     | 131,5645664 | 195,9179369 | 208,9377704 | 292,3171845 | 325,4255329 | 256,868202  | 284,67842   | 0,698244075 | 0,212108849 | 3,291913936 | 0,000995081 | 0,013456416 | 1,622528788 |
| MXI1     | 251,0113439 | 193,288166  | 193,9161007 | 281,4906221 | 372,5561273 | 360,8386647 | 332,8124178 | 0,674448817 | 0,204933835 | 3,291056443 | 0,000998119 | 0,013471128 | 1,595986908 |
| ANXA5    | 5816,538727 | 7331,801452 | 7095,690556 | 9511,736533 | 8429,64346  | 9198,327994 | 7885,229487 | 0,42255569  | 0,128484068 | 3,288778872 | 0,00100623  | 0,013521523 | 1,340299752 |
| AP4S1    | 70,97562137 | 98,6164112  | 88,76441227 | 174,4279496 | 199,7439478 | 138,2195563 | 110,0752939 | 0,983105152 | 0,299203829 | 3,285737205 | 0,001017159 | 0,013635751 | 1,976715372 |
| AKAP13   | 10,3866763  | 67,05915962 | 91,49562496 | 168,4131927 | 130,1702132 | 173,6918318 | 106,34566   | 1,466097436 | 0,446284645 | 3,285117361 | 0,001019399 | 0,013649498 | 2,762735478 |
| ABHD4    | 140,22013   | 215,6412192 | 221,2282275 | 303,1437468 | 300,7380787 | 407,3195774 | 260,016126  | 0,803058318 | 0,244728108 | 3,281430661 | 0,001032819 | 0,013769517 | 1,74479594  |
| CHP1     | 714,9495519 | 855,9904492 | 737,427425  | 1181,298252 | 1137,867208 | 1628,055128 | 979,9125489 | 0,773333305 | 0,235709723 | 3,28087147  | 0,001034869 | 0,013774547 | 1,709214316 |
| RABGAP1L | 160,9934826 | 164,3606853 | 208,9377704 | 263,4463514 | 305,2267067 | 293,5636594 | 170,4699058 | 0,688315244 | 0,209849571 | 3,280041223 | 0,001037919 | 0,013788778 | 1,611400651 |
| MEGF9    | 545,3005056 | 596,9580092 | 678,7063523 | 908,2282892 | 842,7399146 | 785,2827889 | 437,4458921 | 0,476244546 | 0,145251944 | 3,278748177 | 0,001042686 | 0,013814341 | 1,391117755 |
| ZNF567   | 43,27781791 | 71,00381607 | 42,33379662 | 104,6567697 | 92,01687483 | 103,9704627 | 75,12960711 | 0,929160952 | 0,283391064 | 3,27872354  | 0,001042777 | 0,013814341 | 1,904168241 |
| PLXDC2   | 110,7912138 | 211,6965627 | 218,4970148 | 270,6640597 | 341,1357311 | 415,8818508 | 141,9216194 | 0,91899166  | 0,280827462 | 3,272442283 | 0,001066226 | 0,01402962  | 1,890793304 |
| LMAN1    | 74,4378468  | 151,2118305 | 259,4652051 | 532,9074597 | 408,4651517 | 256,868202  | 289,7668485 | 1,29975197  | 0,397527751 | 3,269588012 | 0,001077042 | 0,014085556 | 2,461865543 |
| ABCF2    | 1085,407673 | 1455,578229 | 1386,090438 | 1916,301543 | 1761,786506 | 2391,320642 | 1371,594801 | 0,627047189 | 0,192264993 | 3,261369524 | 0,001108754 | 0,014399708 | 1,544400782 |
| GGPS1    | 51,93338149 | 123,5992354 | 140,6574533 | 229,7637129 | 175,0564936 | 203,0481977 | 146,8643069 | 0,928818134 | 0,285159751 | 3,257185243 | 0,00112523  | 0,014596802 | 1,90371582  |
| UTP23    | 254,4735693 | 347,1297674 | 447,9188804 | 544,9369735 | 636,2630247 | 686,2050538 | 449,1736209 | 0,828480167 | 0,254505621 | 3,255252923 | 0,001132914 | 0,014662625 | 1,775813614 |
| GPR176   | 413,7359392 | 474,6736593 | 397,3914457 | 658,0144029 | 641,8738098 | 943,0732558 | 618,5169095 | 0,80203288  | 0,246579145 | 3,252638742 | 0,001143388 | 0,014724578 | 1,743556216 |
| PLEKHA8  | 29,42891618 | 36,81679352 | 69,64592348 | 102,250867  | 80,79530473 | 96,63137122 | 78,05554332 | 1,025884594 | 0,315363321 | 3,253024455 | 0,001141837 | 0,014724578 | 2,03620751  |
| API5     | 1724,188265 | 2379,942724 | 2899,182265 | 3802,529301 | 3773,814025 | 5419,919062 | 3085,960233 | 0,891590336 | 0,27426932  | 3,25078407  | 0,001150872 | 0,014775885 | 1,855220074 |
| FKTN     | 195,6157369 | 265,6068675 | 307,2614271 | 411,4093707 | 396,1214246 | 436,6759433 | 322,3539834 | 0,690190289 | 0,212439326 | 3,248881934 | 0,001158596 | 0,014858062 | 1,613496322 |

|           |             |             |             |             |             |             |             |             |             |             |             |             |             |
|-----------|-------------|-------------|-------------|-------------|-------------|-------------|-------------|-------------|-------------|-------------|-------------|-------------|-------------|
| MEMO1     | 1104,449913 | 1084,780523 | 1009,183087 | 1360,538007 | 1525,011377 | 1565,67285  | 1190,25826  | 0,477213227 | 0,147095877 | 3,244232525 | 0,001177676 | 0,014983976 | 1,392052119 |
| NOL10     | 1036,936517 | 900,6965557 | 869,8912403 | 1336,478979 | 1447,582543 | 1733,248772 | 1432,492638 | 0,686752316 | 0,2115965   | 3,24557502  | 0,001172137 | 0,014983976 | 1,609655903 |
| VTA1      | 337,5669797 | 506,2309108 | 510,7367722 | 590,6491258 | 781,021279  | 714,3382379 | 624,5796731 | 0,619385859 | 0,190952304 | 3,24366791  | 0,001180012 | 0,014983976 | 1,536221088 |
| LAPTM4A   | 1609,934826 | 2398,35112  | 3053,495782 | 3421,193714 | 3802,990107 | 4898,843566 | 3495,984748 | 0,779052418 | 0,240481295 | 3,239555148 | 0,001197163 | 0,015128156 | 1,716003407 |
| DDIT4     | 1147,727731 | 999,3129669 | 1175,787061 | 1378,582277 | 1749,442779 | 1714,901044 | 1009,659699 | 0,543931479 | 0,168039536 | 3,236925615 | 0,001208249 | 0,015249883 | 1,457940132 |
| KCTD15    | 214,6579768 | 253,7728982 | 198,0129197 | 339,2322881 | 377,0447554 | 352,2763913 | 144,8069317 | 0,680065801 | 0,210320856 | 3,233468214 | 0,001222969 | 0,015297138 | 1,60221283  |
| KPNA5     | 67,51339594 | 68,3740451  | 64,1834981  | 115,4833321 | 100,9941309 | 139,4427382 | 85,94657359 | 0,829910196 | 0,256606752 | 3,234171312 | 0,001219963 | 0,015297138 | 1,77757471  |
| OPHN1     | 81,36229767 | 90,72709831 | 101,0548694 | 146,7600679 | 138,0253122 | 185,9236509 | 121,4527323 | 0,779830047 | 0,241110031 | 3,234332656 | 0,001219273 | 0,015297138 | 1,716928603 |
| PDE12     | 330,6425288 | 419,448469  | 383,7353823 | 560,5753414 | 632,8965537 | 540,646406  | 405,3120596 | 0,610886605 | 0,188938001 | 3,23326489  | 0,00122384  | 0,015297138 | 1,527197456 |
| CHIC1     | 6,924450865 | 17,09351128 | 62,81789176 | 86,6124991  | 62,84079256 | 119,8718276 | 51,08334127 | 1,611465837 | 0,498626647 | 3,231808503 | 0,001230095 | 0,015354314 | 3,055621478 |
| TGFBR1    | 206,0024132 | 272,1812949 | 318,1862778 | 466,745134  | 411,8316227 | 429,3368519 | 386,8657567 | 0,711557568 | 0,220236281 | 3,230882595 | 0,001234086 | 0,015387041 | 1,637571124 |
| DDX52     | 633,5872542 | 561,4561011 | 532,5864736 | 976,7965176 | 968,4214997 | 891,6996154 | 1213,05668  | 0,716446514 | 0,221830628 | 3,229700616 | 0,001239199 | 0,01541657  | 1,643129872 |
| CRISPLD2  | 6,924450865 | 5,259541931 | 5,462425371 | 20,4501734  | 15,71019814 | 24,46363828 | 18,83666183 | 1,79334233  | 0,555548046 | 3,228059832 | 0,001246329 | 0,01548812  | 3,466169799 |
| CDH4      | 605,8894507 | 879,6583879 | 871,2568466 | 1091,076898 | 1357,809982 | 1625,608764 | 536,1929639 | 0,788500457 | 0,244289744 | 3,227726401 | 0,001247783 | 0,015489049 | 1,72727819  |
| ZBTB37    | 60,58894507 | 40,76144996 | 55,98986005 | 84,20659635 | 96,50550287 | 159,0136488 | 52,12101751 | 1,115869113 | 0,345912364 | 3,225872296 | 0,001255894 | 0,015572529 | 2,167255303 |
| NAP1L3    | 5,193338149 | 2,629770965 | 6,828031713 | 19,24722202 | 22,4431402  | 11,00863723 | 44,13080151 | 1,866635584 | 0,579070295 | 3,223504294 | 0,001266324 | 0,015653917 | 3,646811383 |
| UACA      | 2435,675592 | 2064,370208 | 1709,739141 | 2751,149798 | 3172,337867 | 3131,3457   | 4343,302554 | 0,544893704 | 0,169015604 | 3,223925428 | 0,001264463 | 0,015653917 | 1,458912849 |
| AFG3L2    | 392,9625866 | 489,1373996 | 525,7584419 | 639,9701322 | 740,6236266 | 620,1532305 | 537,086701  | 0,50409856  | 0,156415134 | 3,222824717 | 0,001269332 | 0,015669974 | 1,418236922 |
| GABARAPL1 | 88,28674853 | 86,78244186 | 92,8612313  | 115,4833321 | 178,4229646 | 172,4686499 | 182,0142704 | 0,800111675 | 0,248459729 | 3,220287164 | 0,001280622 | 0,015741167 | 1,741235906 |
| LTN1      | 197,3468497 | 243,2538143 | 275,8524812 | 335,623434  | 455,5957461 | 475,8177646 | 377,3722417 | 0,819972026 | 0,254588678 | 3,220771771 | 0,001278459 | 0,015741167 | 1,643129872 |
| PAFAH1B1  | 903,6408379 | 823,1183122 | 830,2886563 | 1115,135926 | 1251,205066 | 1612,153763 | 1141,385385 | 0,638090435 | 0,198502294 | 3,214524241 | 0,001306609 | 0,01598959  | 1,556267905 |
| BDT       | 486,4426733 | 515,4351092 | 420,6067535 | 645,9848891 | 646,3624378 | 692,3209634 | 455,5205879 | 0,480638898 | 0,149591277 | 3,213014214 | 0,001313498 | 0,016038951 | 1,395361466 |
| MORF4L1   | 240,6246676 | 256,4026691 | 284,0461193 | 346,4499964 | 347,8686731 | 428,1136699 | 279,7259402 | 0,520085602 | 0,161902181 | 3,212344626 | 0,001316563 | 0,016044245 | 1,434040334 |
| AKR1B1    | 1284,484636 | 2007,830132 | 2753,062387 | 3202,256564 | 3162,238454 | 3988,796222 | 2057,999429 | 0,775406296 | 0,261508625 | 3,210012875 | 0,00132729  | 0,01615469  | 1,71167203  |
| RFX3      | 36,35336704 | 35,50190803 | 38,23697759 | 67,36527708 | 62,84079256 | 78,2836425  | 44,83559488 | 0,919505124 | 0,28659936  | 3,208329302 | 0,001335085 | 0,016214431 | 1,891466368 |
| SBDS      | 1319,10789  | 1342,498078 | 1249,529804 | 1842,921509 | 2004,17242  | 2134,45244  | 1253,885063 | 0,612960062 | 0,191173322 | 3,20630544  | 0,001344512 | 0,016293686 | 1,529393939 |
| TBC1D2    | 365,2647831 | 273,4961804 | 267,6588432 | 424,6418359 | 460,0843741 | 566,3332262 | 293,6298466 | 0,682400761 | 0,212889309 | 3,205425222 | 0,001348631 | 0,01632599  | 1,604808064 |
| SPEN      | 441,4337427 | 504,9160254 | 372,8105315 | 552,1546818 | 742,8679407 | 829,3173378 | 725,4105968 | 0,687205799 | 0,215600432 | 3,196240155 | 0,001392312 | 0,016800462 | 1,610161947 |
| TMEM41B   | 31,16002889 | 115,7099225 | 177,5288245 | 245,4020808 | 262,5847404 | 271,5463849 | 184,3364567 | 1,254926194 | 0,392831452 | 3,194566497 | 0,00140041  | 0,016843906 | 2,386549391 |
| HBS1L     | 212,9268641 | 214,3263337 | 346,864011  | 366,9001698 | 449,984961  | 589,5736826 | 321,873091  | 0,859389266 | 0,269100876 | 3,193558042 | 0,001405311 | 0,016884772 | 1,814270116 |
| UGGT1     | 623,2005779 | 682,4255655 | 792,0516787 | 962,3611011 | 951,5891445 | 905,1546165 | 840,1500763 | 0,42454632  | 0,132998272 | 3,192119061 | 0,001412331 | 0,016932899 | 1,342150375 |
| YWHAQ     | 5498,013987 | 6855,812907 | 5936,290772 | 9372,194173 | 8161,447934 | 8011,841538 | 6669,414725 | 0,481794802 | 0,151041049 | 3,189826913 | 0,00142358  | 0,017049574 | 1,396479894 |
| RAB8B     | 640,511705  | 640,3492301 | 996,8926301 | 1372,56752  | 1224,273298 | 1592,582852 | 1195,757055 | 0,878497938 | 0,275558199 | 3,188066775 | 0,001432275 | 0,017135434 | 1,838460191 |
| CENPE     | 6,924450865 | 53,91030479 | 105,1516884 | 262,2434001 | 127,9258991 | 168,7991041 | 79,88314271 | 1,739394637 | 0,545865961 | 3,186486723 | 0,001440121 | 0,017192688 | 3,338950341 |
| TPCN1     | 316,7936271 | 370,7977061 | 432,8972106 | 475,1657937 | 658,7061649 | 688,6514177 | 866,0206023 | 0,699950917 | 0,219767104 | 3,184966737 | 0,001447706 | 0,01724659  | 1,624449526 |
| NAP1L4    | 2672,838034 | 2629,770965 | 2400,73595  | 3369,466805 | 4178,912706 | 3706,2412   | 2922,213094 | 0,547137411 | 0,17186916  | 3,183453103 | 0,001455297 | 0,017318649 | 1,461183544 |
| RAB1A     | 135,0267919 | 255,0877836 | 375,5417442 | 608,6933964 | 525,1694807 | 415,8818508 | 322,4294718 | 1,013046494 | 0,318305071 | 3,182627569 | 0,001459452 | 0,017349719 | 2,018168307 |
| GLS       | 3720,161227 | 3176,763326 | 3338,907508 | 4776,919916 | 5455,927383 | 6970,913729 | 3268,997551 | 0,749206094 | 0,235898329 | 3,175970328 | 0,001493362 | 0,017659402 | 1,680867605 |
| DHX57     | 102,1356503 | 148,5820595 | 114,7109328 | 162,3984358 | 210,9655179 | 243,4132009 | 191,2220706 | 0,748819367 | 0,236264963 | 3,169405047 | 0,001527514 | 0,018006388 | 1,680417095 |
| SPAST     | 70,97562137 | 113,0801515 | 113,3453264 | 174,4279496 | 138,0253122 | 173,6918318 | 145,3110409 | 0,69429126  | 0,219166742 | 3,167867775 | 0,001535613 | 0,018038943 | 1,61808934  |
| CRYZL1    | 817,0852021 | 696,8893058 | 714,2121172 | 1004,464399 | 1115,424068 | 1317,366922 | 728,2376703 | 0,626201125 | 0,197839702 | 3,165194433 | 0,001549794 | 0,018142045 | 1,543495337 |
| IFI30     | 839,5896674 | 615,3664059 | 467,0373692 | 922,6637057 | 1087,370143 | 1421,337384 | 1104,618122 | 0,837797675 | 0,264699105 | 3,165094472 | 0,001550326 | 0,018142045 | 1,787319652 |
| NREP      | 623,2005779 | 869,1393041 | 1199,002369 | 1341,290785 | 1510,423336 | 1787,068777 | 977,6344329 | 0,784071357 | 0,247717222 | 3,165187106 | 0,001549833 | 0,018142045 | 1,721983546 |
| TFDP2     | 100,4045375 | 152,526716  | 187,0880689 | 215,3282964 | 256,9739553 | 380,4095753 | 307,4298814 | 0,948527589 | 0,299839352 | 3,163452642 | 0,001559097 | 0,018213041 | 1,929901999 |
| WDR36     | 765,1518206 | 763,9484655 | 871,2568466 | 976,7965176 | 1279,258991 | 1144,898272 | 1143,209276 | 0,502498162 | 0,158996247 | 3,160440385 | 0,001575308 | 0,018357899 | 1,416664527 |
| ATP8A1    | 10,3866763  | 30,2423661  | 55,98986005 | 66,1623257  | 80,79530473 | 107,6400084 | 38,1859127  | 1,374755617 | 0,43575496  | 3,154883581 | 0,001605622 | 0,018595416 | 2,593240788 |
| ZBTB41    | 112,5223266 | 130,1736628 | 129,7326026 | 197,2840257 | 222,187088  | 269,1000211 | 174,292654  | 0,884082571 | 0,280446763 | 3,152407826 | 0,001619299 | 0,018696001 | 1,845590612 |
| TRAPPC8   | 341,0292051 | 420,7633545 | 488,8870707 | 700,1177011 | 659,8283219 | 535,7536784 | 477,6912136 | 0,597375976 | 0,189545392 | 3,151624898 | 0,001623647 | 0,018726952 | 1,512962234 |
| MFSD9     | 117,7156647 | 124,9141209 | 84,66759324 | 178,0368037 | 160,4684524 | 195,7091063 | 112,2063683 | 0,708216686 | 0,224971838 | 3,148023728 | 0,001643783 | 0,018939758 | 1,63378335  |
| NID2      | 159,2623699 | 106,5057241 | 167,9695801 | 222,5460046 | 237,8972861 | 425,6673061 | 614,2646076 | 1,032200605 | 0,328324035 | 3,143847218 | 0,001667425 | 0,019104578 | 2,045141416 |

|          |             |             |             |             |             |              |             |             |             |             |             |             |             |
|----------|-------------|-------------|-------------|-------------|-------------|--------------|-------------|-------------|-------------|-------------|-------------|-------------|-------------|
| LAMTOR3  | 112,5223266 | 193,288166  | 319,5518842 | 356,0736074 | 363,5788713 | 532,0841326  | 376,3488005 | 0,995892991 | 0,317037409 | 3,141247572 | 0,001682298 | 0,019214339 | 1,994314573 |
| LMCD1    | 136,7579046 | 111,765266  | 81,93638056 | 194,878123  | 181,7894356 | 229,9581999  | 169,320536  | 0,882032779 | 0,280911372 | 3,139897015 | 0,001690072 | 0,019275404 | 1,842970246 |
| ERD1L    | 181,7668352 | 365,5381642 | 680,0719586 | 845,6748176 | 781,021279  | 1006,5323172 | 607,5323172 | 1,098680902 | 0,35011757  | 3,138034185 | 0,00170085  | 0,019378654 | 2,141587914 |
| HIGD1A   | 401,6181502 | 554,8816737 | 603,5980035 | 707,3354093 | 801,2201052 | 1054,38281   | 559,830825  | 0,71393585  | 0,282097818 | 3,129954759 | 0,001748332 | 0,019839156 | 1,640272885 |
| NR1D2    | 479,5182224 | 393,1507593 | 521,6616229 | 713,3501662 | 691,2487182 | 666,6341432  | 644,6674555 | 0,571752602 | 0,182713811 | 3,129224877 | 0,001752681 | 0,019868436 | 1,486328083 |
| INIP     | 275,2462912 | 336,6106836 | 300,4333954 | 395,7710028 | 465,6951592 | 440,3454891  | 324,6961493 | 0,510225947 | 0,16315288  | 3,127287406 | 0,001764274 | 0,019929333 | 1,42427324  |
| HDLBP    | 6631,892816 | 7262,112521 | 6668,255771 | 8089,848006 | 10496,65667 | 11382,93089  | 8729,812902 | 0,543448224 | 0,174168267 | 3,12024821  | 0,001806987 | 0,020311944 | 1,457451852 |
| PRTG     | 76,16895952 | 80,20801445 | 53,25864736 | 126,3098945 | 111,093544  | 121,0950095  | 82,67457728 | 0,776672889 | 0,249348155 | 3,114813056 | 0,001840615 | 0,020554147 | 1,713175427 |
| RPL34    | 128,102341  | 109,1354951 | 147,485485  | 212,9223936 | 205,3547328 | 190,8163786  | 154,8091859 | 0,663811534 | 0,213412726 | 3,110459004 | 0,001867968 | 0,020776985 | 1,584262649 |
| BNIP3L   | 936,5319795 | 1264,919834 | 983,2365667 | 1586,692865 | 1692,212771 | 1554,664213  | 1578,175986 | 0,601117271 | 0,193375386 | 3,108550826 | 0,001880073 | 0,020849695 | 1,516890785 |
| PLCE1    | 93,48008668 | 94,67175476 | 122,9045708 | 162,3984358 | 157,1019814 | 211,6104711  | 143,5735436 | 0,768028561 | 0,247067311 | 3,108580241 | 0,001879886 | 0,020849695 | 1,702941129 |
| ITGAV    | 645,7050432 | 786,3015187 | 1024,204757 | 1431,512138 | 1170,409762 | 1804,193323  | 874,252121  | 0,842118117 | 0,27104969  | 3,106877258 | 0,001890749 | 0,020906174 | 1,792680165 |
| SCLT1    | 36,35336704 | 39,44656448 | 66,91471079 | 97,43906149 | 89,77256081 | 95,4081893   | 56,25444949 | 0,976248443 | 0,314647066 | 3,102677726 | 0,001917784 | 0,02114267  | 1,967342911 |
| SCAMP2   | 569,5360837 | 577,2347269 | 719,6745426 | 828,8334983 | 928,0238473 | 810,9696091  | 699,134628  | 0,459279354 | 0,148046022 | 3,102274185 | 0,0019204   | 0,021150758 | 1,374854887 |
| SCARNA9L | 185,2290606 | 181,4541966 | 238,98111   | 388,5532946 | 398,3657386 | 251,9754743  | 184,7010073 | 0,777796554 | 0,250993403 | 3,098872501 | 0,001942586 | 0,021339168 | 1,714510279 |
| TRIAP1   | 555,6871819 | 666,6469397 | 740,1586377 | 884,1692616 | 833,7626585 | 979,7687132  | 758,1413689 | 0,456257726 | 0,147303073 | 3,097408072 | 0,001952209 | 0,021417109 | 1,37197836  |
| ROR1     | 287,3647109 | 369,4828206 | 413,7787218 | 560,5753414 | 506,0928115 | 607,9214113  | 419,4884983 | 0,642057117 | 0,207344857 | 3,0965664   | 0,00195776  | 0,021436137 | 1,560552742 |
| WBPS     | 557,4182947 | 429,9675528 | 591,3075464 | 780,7154433 | 766,4332379 | 960,1978026  | 911,3833607 | 0,668084669 | 0,215855693 | 3,095052352 | 0,001967782 | 0,021524887 | 1,58896205  |
| AMMECR1  | 256,204682  | 295,8492336 | 255,3683861 | 371,7119753 | 463,4508452 | 567,5564082  | 279,4862425 | 0,795903132 | 0,257390998 | 3,092194898 | 0,001986824 | 0,021678584 | 1,736163879 |
| C9orf85  | 0           | 21,03816772 | 23,21530783 | 69,77117983 | 39,27549535 | 34,2490936   | 27,14184118 | 1,646579768 | 0,533497118 | 3,086389244 | 0,002026034 | 0,021990789 | 3,130905074 |
| DTX3L    | 294,2891618 | 289,2748062 | 393,2946267 | 425,8447872 | 498,2377125 | 567,5564082  | 341,079725  | 0,609126641 | 0,197511077 | 3,084012546 | 0,00204229  | 0,022107493 | 1,525335542 |
| TTC37    | 410,2737138 | 451,0057206 | 532,5864736 | 670,0439166 | 657,5840079 | 634,8314134  | 599,6157671 | 0,491411402 | 0,159359385 | 3,083667782 | 0,002044658 | 0,022107493 | 1,405819529 |
| SLC17A5  | 100,405375  | 122,2843499 | 150,2166977 | 209,3135395 | 218,820617  | 166,3527403  | 126,2813395 | 0,666724133 | 0,216256964 | 3,083018092 | 0,002049127 | 0,022134512 | 1,587464284 |
| HNMT     | 70,97562137 | 71,00381607 | 73,7427425  | 111,874478  | 124,5564281 | 118,6486457  | 79,70166897 | 0,718909583 | 0,232335055 | 3,081018336 | 0,002062939 | 0,022262307 | 1,645937533 |
| MSMO1    | 753,0340316 | 821,8034267 | 1326,003759 | 1586,692865 | 1517,156278 | 1821,31787   | 849,1524424 | 0,762833873 | 0,247753494 | 3,079003493 | 0,002076942 | 0,022370443 | 1,696820403 |
| RCN1     | 6739,221805 | 5740,790018 | 5511,587199 | 8454,342273 | 8696,716828 | 11225,14043  | 6273,83907  | 0,657457345 | 0,213567462 | 3,078452764 | 0,002080785 | 0,022390364 | 1,577300284 |
| SAP30L   | 103,8667631 | 148,5820595 | 118,8077518 | 156,3836789 | 204,2325758 | 286,2245679  | 182,447332  | 0,795343059 | 0,258497661 | 3,07679016  | 0,002092425 | 0,022494074 | 1,735490008 |
| GSTA4    | 22,50446533 | 63,11450317 | 106,5172947 | 139,5423597 | 157,1019814 | 218,9495626  | 63,9456435  | 1,413075321 | 0,459596364 | 3,074600742 | 0,002107845 | 0,022594974 | 2,663042256 |
| HMGCS1   | 822,2785403 | 698,2041913 | 760,6427329 | 1093,482801 | 1179,387018 | 945,5196196  | 706,9694579 | 0,497949442 | 0,161946723 | 3,074773187 | 0,002106627 | 0,022594974 | 1,412204914 |
| RASGRF2  | 76,16895952 | 139,3778612 | 139,291847  | 208,1105881 | 209,8433609 | 309,4650243  | 91,40830953 | 1,02863309  | 0,334735165 | 3,072975886 | 0,002119356 | 0,022696708 | 2,040090412 |
| ZNF395   | 405,0803756 | 389,2061029 | 378,2729569 | 500,4277726 | 520,6808527 | 544,3159518  | 453,7114211 | 0,41796596  | 0,13610865  | 3,070825835 | 0,002134676 | 0,022828019 | 1,336042555 |
| ATP5J2   | 2572,433496 | 2207,692725 | 1782,116277 | 2704,234694 | 3749,126571 | 3986,349858  | 3164,849106 | 0,670240429 | 0,218317062 | 3,070032287 | 0,002140356 | 0,022856238 | 1,591338146 |
| PCNXL4   | 484,7115606 | 811,2843428 | 680,0719586 | 901,0105809 | 1156,943877 | 987,1078047  | 802,9567649 | 0,621433965 | 0,202818503 | 3,063990491 | 0,002184059 | 0,0232566   | 1,538403516 |
| AGPS     | 569,5360837 | 536,4732769 | 749,7178821 | 974,3906149 | 905,5807071 | 906,3777984  | 795,6543954 | 0,585729316 | 0,191259271 | 3,062488498 | 0,002195049 | 0,023351498 | 1,500797486 |
| VCAM1    | 109,0601011 | 164,3606853 | 251,271567  | 323,5939202 | 461,2065311 | 247,0827467  | 408,173517  | 0,971571808 | 0,317978583 | 3,055463035 | 0,002247133 | 0,023703561 | 1,960975904 |
| VCAN     | 398,1559248 | 725,8167865 | 965,4836843 | 1550,604324 | 1707,922969 | 919,8327994  | 673,2898023 | 0,998516575 | 0,326773646 | 3,055682697 | 0,002245488 | 0,023703561 | 1,997944593 |
| THEM4    | 202,5401878 | 132,8034338 | 120,1733582 | 233,372567  | 288,3943516 | 216,5031988  | 219,0158411 | 0,707286047 | 0,231731106 | 3,052184321 | 0,002271826 | 0,023874357 | 1,632729786 |
| LRRFIP1  | 1881,719523 | 1466,097313 | 1436,617872 | 2194,183311 | 2400,293845 | 2747,266579  | 1569,330476 | 0,618452033 | 0,202688646 | 3,051241614 | 0,002278971 | 0,023927066 | 1,535227046 |
| FRMD2    | 538,3760548 | 604,847322  | 790,6860724 | 1380,98818  | 1165,921133 | 818,3087006  | 939,2946041 | 0,798408497 | 0,261695767 | 3,050903375 | 0,00228154  | 0,02393167  | 1,739181498 |
| AP1M2    | 228,5068786 | 181,4541966 | 200,7441324 | 335,623434  | 289,5165086 | 332,7054806  | 130,9121354 | 0,652286928 | 0,213974566 | 3,048432065 | 0,002300389 | 0,024095533 | 1,571657578 |
| CCNJL    | 254,4735693 | 234,0496159 | 258,0995988 | 395,7710028 | 316,4482768 | 358,3923008  | 320,1586169 | 0,520315502 | 0,170887859 | 3,044777456 | 0,002328525 | 0,024333632 | 1,434268873 |
| SLC38A6  | 117,7156647 | 144,6374031 | 155,6791231 | 209,3135395 | 203,1104188 | 366,9545742  | 301,2539612 | 0,894861114 | 0,294230002 | 3,041365968 | 0,002355074 | 0,024519833 | 1,859430873 |
| C7orf23  | 20,7733526  | 63,11450317 | 133,8294216 | 192,4722202 | 158,2241384 | 217,7263807  | 104,4507829 | 1,373572092 | 0,452191523 | 3,037589211 | 0,002384788 | 0,024783264 | 2,591113285 |
| APIP     | 290,8269363 | 483,8778576 | 491,6182834 | 585,8373203 | 629,5300827 | 751,0336953  | 604,8479986 | 0,630507142 | 0,207827792 | 3,03379608  | 0,002414976 | 0,024981438 | 1,548109095 |
| ACTBL2   | 12,11778901 | 26,29770965 | 27,31212685 | 51,72690918 | 39,27549535 | 51,37364039  | 146,7734767 | 1,081705887 | 0,356630108 | 3,033131145 | 0,002420304 | 0,024990528 | 2,116537261 |
| SLFN12   | 145,4134682 | 82,83778541 | 117,4421455 | 168,4131927 | 219,942774  | 214,056835   | 173,4506192 | 0,809884437 | 0,267001228 | 3,033261097 | 0,002419262 | 0,024990528 | 1,753071013 |
| MTRF1    | 5,193338149 | 18,40839676 | 23,21530783 | 33,68263854 | 44,8862804  | 41,58818508  | 24,63533196 | 1,318588787 | 0,434958014 | 3,031531195 | 0,002433168 | 0,025054268 | 2,494220112 |
| UBR4     | 1789,970549 | 1665,959907 | 1917,311305 | 2245,91022  | 2679,71094  | 3630,403921  | 3458,495494 | 0,67112326  | 0,221723009 | 3,026854378 | 0,00247113  | 0,02536608  | 1,592312234 |
| CEP70    | 77,90007224 | 80,20801445 | 79,20516787 | 121,498089  | 139,1474692 | 125,9877372  | 78,93865629 | 0,704081945 | 0,233030563 | 3,021414601 | 0,002515966 | 0,025668025 | 1,629107657 |
| MPC2     | 607,6205634 | 746,8549542 | 831,6542627 | 1024,914573 | 930,2681613 | 1438,461931  | 648,77869   | 0,632922649 | 0,209608674 | 3,019544171 | 0,002531554 | 0,025765085 | 1,550703269 |

|          |             |             |             |             |             |             |             |             |             |             |             |             |             |
|----------|-------------|-------------|-------------|-------------|-------------|-------------|-------------|-------------|-------------|-------------|-------------|-------------|-------------|
| NSD1     | 365,2647831 | 382,6316755 | 385,1009886 | 477,5716964 | 556,589877  | 680,0891443 | 525,174096  | 0,596702457 | 0,19768133  | 3,018506898 | 0,002540236 | 0,025802001 | 1,512256076 |
| EPG5     | 278,7091473 | 358,9637368 | 509,3711658 | 680,870479  | 711,4475444 | 518,6291316 | 406,5994184 | 0,733879651 | 0,243446319 | 3,014544041 | 0,002573658 | 0,026070765 | 1,663105455 |
| POGLUT1  | 83,09341038 | 163,0457999 | 120,1733582 | 214,125345  | 212,0876749 | 193,2627424 | 218,4462608 | 0,747387656 | 0,248102583 | 3,012413845 | 0,00259179  | 0,026183604 | 1,678750299 |
| C11orf54 | 148,8756936 | 170,9351128 | 206,2065577 | 241,7932267 | 253,6074843 | 288,6709317 | 243,6786841 | 0,570414001 | 0,189410222 | 3,011527013 | 0,002599373 | 0,026236616 | 1,484949636 |
| NIPAI    | 166,1868208 | 195,9179369 | 191,184888  | 270,6640597 | 240,1416002 | 321,6968434 | 217,320145  | 0,585040365 | 0,194829181 | 3,002837469 | 0,002674752 | 0,026876716 | 1,500080959 |
| DHCR24   | 2638,21578  | 3324,0305   | 3073,979877 | 4601,289015 | 4312,44939  | 3619,395284 | 3107,141566 | 0,471538666 | 0,157068383 | 3,002123382 | 0,002681035 | 0,026915769 | 1,386587506 |
| FAM129A  | 3012,136126 | 2341,811045 | 2213,647881 | 2997,75483  | 4013,955625 | 3834,675301 | 1955,471174 | 0,520006642 | 0,173331165 | 3,000075841 | 0,002699124 | 0,027073177 | 1,43396185  |
| TTC39B   | 29,42891618 | 44,70610641 | 64,1834981  | 58,94461744 | 103,2384449 | 114,9790999 | 54,64700578 | 0,988393781 | 0,329802083 | 2,996930078 | 0,002727133 | 0,027281039 | 1,983974911 |
| GPAM     | 91,74897397 | 93,35686927 | 102,4204757 | 155,1807276 | 130,1702132 | 162,6831946 | 318,7795021 | 0,63668702  | 0,212669421 | 2,993787336 | 0,002755379 | 0,027490169 | 1,554754744 |
| UBP1     | 545,3005056 | 519,3797657 | 540,7801117 | 766,2800268 | 620,5528266 | 731,4627846 | 637,1147721 | 0,39989275  | 0,133868379 | 2,987208421 | 0,002815377 | 0,027939882 | 1,319409822 |
| RRP1B    | 1081,945448 | 769,2080074 | 872,622453  | 1200,545474 | 1343,212941 | 1461,702387 | 1023,333672 | 0,557952514 | 0,186801664 | 2,986871214 | 0,002818484 | 0,02794603  | 1,472178405 |
| LIMS1    | 1445,479118 | 1220,213728 | 923,1498876 | 1634,810921 | 1863,902794 | 1754,042865 | 1330,760768 | 0,550826767 | 0,18450662  | 2,985403818 | 0,002832042 | 0,028055695 | 1,464924962 |
| LANCL1   | 574,7294218 | 383,946561  | 419,2411472 | 600,2727368 | 789,9985351 | 684,9818719 | 502,4483366 | 0,594639052 | 0,199350808 | 2,982877555 | 0,002855522 | 0,028263379 | 1,510094727 |
| DLAT     | 432,7781791 | 507,5457963 | 640,4693747 | 684,4793332 | 777,654808  | 880,6909782 | 673,6058022 | 0,565381188 | 0,189698349 | 2,98042229  | 0,002878513 | 0,028465855 | 1,479778444 |
| FAM160A1 | 72,70673409 | 123,5992354 | 135,1950279 | 221,3430533 | 185,1559067 | 160,2368308 | 112,9019391 | 0,762901823 | 0,256083708 | 2,97911112  | 0,002890859 | 0,028490116 | 1,696900324 |
| MIS18BP1 | 432,7781791 | 516,7499947 | 472,4997946 | 621,9258616 | 686,7600902 | 835,4332474 | 476,0999546 | 0,591018215 | 0,198407101 | 2,978815845 | 0,002893646 | 0,028490116 | 1,506309485 |
| NAA15    | 192,1535115 | 500,9713689 | 797,5141041 | 1216,183842 | 788,8763781 | 1473,934207 | 783,1310622 | 1,220857701 | 0,40982385  | 2,978981584 | 0,002892082 | 0,028490116 | 2,330852483 |
| PIAS2    | 219,851315  | 419,448469  | 517,5648039 | 623,128813  | 622,7971406 | 724,1236932 | 444,7371961 | 0,763797624 | 0,256384099 | 2,97911464  | 0,002890826 | 0,028490116 | 1,697954294 |
| NSMCE4A  | 245,8180057 | 287,9599207 | 304,5302144 | 389,7562459 | 386,0220115 | 518,6291316 | 331,4778208 | 0,623945536 | 0,209839491 | 2,97344191  | 0,002944801 | 0,028867277 | 1,541084037 |
| CHST9    | 31,16002889 | 30,2423661  | 27,31212685 | 48,11805506 | 80,79530473 | 70,94455102 | 24,10616206 | 1,175138516 | 0,396316785 | 2,965149496 | 0,003025359 | 0,02942587  | 2,258145608 |
| MYOF     | 1196,198887 | 1109,763347 | 1209,92722  | 1539,777762 | 1735,976895 | 2989,456598 | 1237,930674 | 0,833455809 | 0,281174579 | 2,964193318 | 0,003034776 | 0,029466439 | 1,781948706 |
| TPRKB    | 415,4670519 | 543,0477044 | 503,9087404 | 670,0439166 | 781,021279  | 715,5614198 | 743,164025  | 0,565097366 | 0,190666569 | 2,963798896 | 0,003038668 | 0,029478753 | 1,479487355 |
| PLS1     | 199,0779624 | 191,9732805 | 269,0244495 | 299,5348927 | 323,1812189 | 458,6932178 | 207,5625459 | 0,710348373 | 0,239818326 | 2,962027069 | 0,003056209 | 0,029618031 | 1,636199169 |
| CHMP3    | 955,5742194 | 1049,278615 | 1062,441735 | 1163,253981 | 1604,684524 | 1390,757836 | 1200,092034 | 0,438717966 | 0,148159989 | 2,9611096   | 0,003065328 | 0,02966055  | 1,565399332 |
| PSAT1    | 1270,636734 | 1551,56487  | 1511,726221 | 1957,201889 | 1934,598685 | 2330,161546 | 1253,168675 | 0,52090885  | 0,175977115 | 2,960094274 | 0,003075449 | 0,029732871 | 1,434858876 |
| CLTCL1   | 57,12671964 | 38,131679   | 15,02166977 | 80,59774222 | 61,71863555 | 90,51546165 | 59,1137428  | 1,099701845 | 0,371614542 | 2,959254069 | 0,003083847 | 0,029775298 | 2,143103975 |
| DDOST    | 2672,838034 | 2419,389288 | 2602,845689 | 3696,66958  | 3541,527524 | 3505,639366 | 4683,094536 | 0,481676567 | 0,1628314   | 2,958130714 | 0,003095108 | 0,029775298 | 1,396365451 |
| FAM126B  | 60,58894507 | 113,0801515 | 105,1516884 | 143,1512138 | 160,4684524 | 163,9063765 | 126,8582843 | 0,731569403 | 0,247335324 | 2,95780397  | 0,003098391 | 0,029775298 | 1,660444386 |
| IL13RA1  | 67,51339594 | 155,156487  | 255,3683861 | 315,1732606 | 295,1272936 | 386,5254849 | 351,5690899 | 1,053421517 | 0,356034797 | 2,958760005 | 0,003088796 | 0,029775298 | 2,075446175 |
| MED6     | 602,4272253 | 767,8931219 | 655,4910445 | 931,0843653 | 888,748352  | 989,5541685 | 1042,490766 | 0,469849063 | 0,158934714 | 2,956239393 | 0,003114153 | 0,02990119  | 1,384964564 |
| C12orf23 | 292,5580491 | 320,8320578 | 367,3481062 | 488,3982588 | 417,4424077 | 653,1791421 | 487,9063643 | 0,666717315 | 0,225849014 | 2,952048812 | 0,00315673  | 0,030232487 | 1,587456781 |
| ZNF614   | 48,47115606 | 34,18702255 | 40,96819028 | 70,97413121 | 69,57373462 | 75,83727868 | 56,48181929 | 0,819736694 | 0,27768182  | 2,952071887 | 0,003156494 | 0,030232487 | 1,765083818 |
| NAA60    | 379,1136849 | 499,6564834 | 650,0286191 | 756,6564157 | 759,7002958 | 810,9696091 | 550,522967  | 0,603426588 | 0,204678523 | 2,948167595 | 0,003196637 | 0,030505457 | 1,519320868 |
| PPP2R5A  | 93,48008668 | 138,0629757 | 177,5288245 | 257,4315945 | 203,1104188 | 288,6709317 | 187,3866579 | 0,866326047 | 0,29387331  | 2,947957568 | 0,00319881  | 0,030505457 | 1,823014513 |
| ABAT     | 12,11778901 | 7,889312896 | 20,48409514 | 30,07378441 | 30,29823927 | 34,2490936  | 72,17388386 | 1,221251067 | 0,415296943 | 2,940669534 | 0,003275037 | 0,031100396 | 2,331488102 |
| NMT2     | 105,5978757 | 94,67175476 | 116,0765391 | 178,0368037 | 155,9798244 | 170,0222861 | 129,7467473 | 0,672188778 | 0,228739189 | 2,938669063 | 0,003296248 | 0,03124899  | 1,593488688 |
| LMBRD1   | 36,35336704 | 38,131679   | 62,81789176 | 83,00364497 | 90,89471782 | 73,39091485 | 55,78589625 | 0,840503856 | 0,286147447 | 2,937310337 | 0,003310726 | 0,031306984 | 1,790675419 |
| EIF1AX   | 3403,3676   | 3372,681263 | 2776,277695 | 4513,473564 | 4154,225251 | 5466,399974 | 3024,794874 | 0,565331214 | 0,192583397 | 2,935513765 | 0,003329958 | 0,031409532 | 1,479727186 |
| SMURF2   | 1152,921069 | 995,3683104 | 1209,92722  | 1656,464045 | 1527,255691 | 2075,739708 | 1551,067799 | 0,647308598 | 0,220688392 | 2,933133875 | 0,003355592 | 0,031519526 | 1,566243582 |
| TMED5    | 792,8496241 | 1091,354951 | 613,1572479 | 1432,715089 | 1853,803381 | 1497,174663 | 1090,769564 | 0,937520716 | 0,31963164  | 2,933128636 | 0,003355648 | 0,031519526 | 1,915134062 |
| LMAN2L   | 458,7448698 | 441,8015222 | 449,2844867 | 504,0366267 | 715,9361724 | 640,947323  | 680,4370502 | 0,464216782 | 0,15850236  | 2,928768895 | 0,003403073 | 0,031858439 | 1,379568203 |
| EYA4     | 95,2111994  | 181,4541966 | 154,3135167 | 218,9371505 | 226,675716  | 245,8595647 | 159,852307  | 0,670914041 | 0,229155341 | 2,927769595 | 0,003414029 | 0,031934393 | 1,592081335 |
| CCNJ     | 50,20226877 | 77,57824348 | 69,64592348 | 104,6567697 | 106,604916  | 122,3181914 | 95,99247248 | 0,743368948 | 0,253925778 | 2,927504851 | 0,003416937 | 0,031935003 | 1,674080552 |
| TMEM126B | 36,35336704 | 219,5858756 | 319,5518842 | 581,0255148 | 456,7179031 | 440,3454891 | 252,4734107 | 1,356066758 | 0,464001155 | 2,922550393 | 0,003471774 | 0,032339895 | 2,559863279 |
| FBXO21   | 240,6246676 | 343,185111  | 305,8958208 | 363,2913157 | 485,8939854 | 433,0063976 | 404,1617446 | 0,522710734 | 0,17891893  | 2,921494868 | 0,00348356  | 0,032422796 | 1,436652094 |
| LCA5     | 62,32005779 | 74,94847251 | 84,66759324 | 99,84496424 | 151,4911964 | 116,2022818 | 89,14738544 | 0,722455835 | 0,247401283 | 2,920178207 | 0,003498313 | 0,032479377 | 1,649988347 |
| ANKS3    | 103,866763  | 81,52289993 | 81,93638056 | 122,7010404 | 155,9798244 | 133,3268286 | 105,0346597 | 0,634358373 | 0,217346585 | 2,918648911 | 0,003515519 | 0,032584379 | 1,552247247 |
| FAF2     | 159,2623699 | 194,6030514 | 267,6588432 | 336,8263854 | 280,5392525 | 329,0359349 | 309,0761878 | 0,600427476 | 0,205738563 | 2,918400267 | 0,003518324 | 0,032584379 | 1,516165746 |
| ORC2     | 81,36229767 | 207,7519063 | 316,8206715 | 400,5828083 | 361,3345572 | 423,2209423 | 255,1050199 | 0,961287717 | 0,329644249 | 2,916136778 | 0,003543951 | 0,032794683 | 1,947047009 |
| ARID4A   | 93,48008668 | 124,9141209 | 178,8944309 | 193,6751716 | 227,797873  | 335,1518445 | 257,8450438 | 0,924086726 | 0,317339567 | 2,911980802 | 0,003591447 | 0,033125055 | 1,897482691 |

|           |              |             |             |             |             |             |             |             |             |             |             |             |             |
|-----------|--------------|-------------|-------------|-------------|-------------|-------------|-------------|-------------|-------------|-------------|-------------|-------------|-------------|
| CRYAB     | 1,731112716  | 5,259541931 | 5,462425371 | 8,420659635 | 28,05392525 | 7,339091485 | 66,16895957 | 1,777198588 | 0,610517228 | 2,910972051 | 0,003603062 | 0,033150535 | 3,427599598 |
| IFIT1     | 22,50446531  | 64,42938865 | 103,786082  | 104,6567697 | 125,6815851 | 195,7091063 | 198,34868   | 1,144439936 | 0,393116798 | 2,91119571  | 0,003600484 | 0,033150535 | 2,210602969 |
| ZNF280B   | 107,3289884  | 113,0801515 | 83,3019869  | 151,5718734 | 152,6133534 | 172,4686499 | 80,62821965 | 0,651564063 | 0,223802173 | 2,911339308 | 0,00359883  | 0,033150535 | 1,570870294 |
| ANKRD12   | 410,2737138  | 677,1660236 | 690,9968094 | 748,2357561 | 961,6885576 | 1059,275538 | 944,634456  | 0,636118208 | 0,21860247  | 2,909931474 | 0,00361508  | 0,033233887 | 1,554141872 |
| IDH1      | 798,0429622  | 1033,499989 | 1265,91708  | 1356,929153 | 1479,002939 | 1943,636062 | 912,7807414 | 0,624554508 | 0,214691956 | 2,909072699 | 0,003625026 | 0,033270863 | 1,541734677 |
| SRFBP1    | 218,1202023  | 310,3129739 | 309,9926398 | 358,4795102 | 429,7861349 | 468,4786731 | 315,2537993 | 0,579064882 | 0,199089394 | 2,908567202 | 0,003630891 | 0,033297496 | 1,49388064  |
| SUV39H2   | 207,733526   | 243,2538143 | 304,5302144 | 407,8005166 | 351,2351442 | 363,2850285 | 251,2565873 | 0,566699576 | 0,194863843 | 2,90818229  | 0,003635364 | 0,033311317 | 1,481131338 |
| ATL3      | 1628,977066  | 1497,654565 | 1428,424234 | 1802,021162 | 2115,265964 | 2573,574747 | 1677,476008 | 0,511267578 | 0,17589164  | 2,906719035 | 0,003652411 | 0,033371801 | 1,425301942 |
| SPCS2     | 3810,179089  | 3832,891182 | 3501,414663 | 4550,765057 | 5268,527162 | 5304,939962 | 3634,004678 | 0,440607026 | 0,151690338 | 2,904647935 | 0,003676664 | 0,033498495 | 1,35717525  |
| RSL1D1    | 2155,235332  | 1706,721357 | 1745,244906 | 2642,884174 | 2527,097587 | 2269,002451 | 2210,311872 | 0,408940818 | 0,140818656 | 2,904024436 | 0,003683994 | 0,033538079 | 1,327710692 |
| SLC25A23  | 441,4337427  | 523,3244221 | 456,1125184 | 613,505202  | 731,6463706 | 924,7255271 | 419,4924283 | 0,674952652 | 0,232476397 | 2,903316897 | 0,003692328 | 0,033586732 | 1,596544375 |
| CCAR1     | 1225,627803  | 1247,826323 | 1062,441735 | 1521,733491 | 1738,221209 | 1970,546064 | 1264,468195 | 0,565014075 | 0,19463718  | 2,902909266 | 0,003697137 | 0,033603269 | 1,479401942 |
| RNLS      | 39,81559248  | 13,14885483 | 20,48409514 | 50,52395781 | 51,61922246 | 45,25773082 | 75,56331184 | 1,04952006  | 0,361697757 | 2,901649346 | 0,003712038 | 0,033684196 | 2,069841161 |
| ZFR       | 576,4605345  | 573,2900705 | 759,2771265 | 873,3426993 | 857,3279557 | 985,8846228 | 862,8279673 | 0,50782506  | 0,175134067 | 2,899636089 | 0,003735961 | 0,03381933  | 1,421904981 |
| OTUD4     | 493,3671242  | 603,5324366 | 438,359636  | 834,8482552 | 655,3396939 | 697,2136911 | 542,5753524 | 0,509600343 | 0,175785727 | 2,898985891 | 0,003743717 | 0,033862255 | 1,423655758 |
| ZNF451    | 46,74004334  | 77,57824348 | 84,66759324 | 111,874478  | 130,1702132 | 110,0863723 | 110,3228164 | 0,737909954 | 0,254728169 | 2,896852584 | 0,003769268 | 0,034065937 | 1,667757991 |
| SSBP1     | 2778,43591   | 2941,398825 | 3572,426192 | 4270,477386 | 4228,287614 | 3766,177114 | 3370,500905 | 0,400084871 | 0,138150872 | 2,895999609 | 0,003779529 | 0,034115076 | 1,319585538 |
| USP53     | 126,3712283  | 165,6755708 | 174,7976119 | 198,4869771 | 294,0051366 | 240,9668371 | 263,3940091 | 0,647105098 | 0,223455931 | 2,895895821 | 0,003780779 | 0,034115076 | 1,566022671 |
| EVI5      | 53,66449421  | 84,15267089 | 117,4421455 | 192,4722202 | 127,9258991 | 133,3268286 | 146,2665315 | 0,817535429 | 0,282585456 | 2,893055569 | 0,003815138 | 0,034287408 | 1,762392705 |
| TP1       | 14253,326083 | 2945,343481 | 4256,59497  | 6013,553931 | 5597,319166 | 7896,862438 | 5060,918716 | 0,779507727 | 0,269617346 | 2,891163116 | 0,003838188 | 0,034466994 | 1,716545058 |
| APOL3     | 41,54670519  | 36,81679352 | 28,6777332  | 58,94461744 | 52,74137947 | 68,49818719 | 168,1133273 | 0,760787986 | 0,263320515 | 2,889208941 | 0,003862124 | 0,034630646 | 1,694415846 |
| CCBE1     | 53,66449421  | 42,07633545 | 53,25864736 | 97,43906149 | 69,57373462 | 70,94455102 | 493,4945798 | 0,68132968  | 0,235821782 | 2,889171957 | 0,003862578 | 0,034630646 | 1,603617071 |
| RRP15     | 166,1868208  | 243,2538143 | 286,777332  | 372,9149267 | 390,5106395 | 404,8732136 | 309,8716183 | 0,742390102 | 0,256997624 | 2,888704142 | 0,003868328 | 0,034654547 | 1,672945099 |
| NEGR1     | 6,924450865  | 30,2423661  | 47,79622199 | 70,97413121 | 54,98569349 | 59,93591379 | 97,66796254 | 1,09209311  | 0,269706089 | 2,885847109 | 0,003903617 | 0,034755659 | 2,131831053 |
| TMED2     | 5473,778409  | 4871,650713 | 4296,197554 | 6025,583444 | 7399,503324 | 8479,097029 | 6817,042982 | 0,58127523  | 0,201417114 | 2,885927713 | 0,003902618 | 0,034755659 | 1,496171163 |
| BTN3A1    | 25,96669075  | 28,92748062 | 45,06500931 | 50,52395781 | 65,08510658 | 75,83727868 | 57,12700805 | 0,925942795 | 0,321262412 | 2,882200843 | 0,003949079 | 0,035098067 | 1,899925429 |
| LMBR1L    | 323,718078   | 262,9770965 | 238,98111   | 394,5680515 | 435,3969199 | 388,9718487 | 466,8198501 | 0,566225148 | 0,196511961 | 2,881377527 | 0,003959411 | 0,035162072 | 1,48064435  |
| SRGN      | 709,7562137  | 704,7786187 | 820,7294119 | 1081,453287 | 1063,804846 | 1499,621027 | 218,011051  | 0,705074573 | 0,244840167 | 2,879734086 | 0,003980107 | 0,035317949 | 1,63022893  |
| FAM117B   | 41,54670519  | 84,15267089 | 60,08667908 | 92,62725598 | 92,01687483 | 138,2195563 | 104,8576519 | 0,778154768 | 0,270318825 | 2,87865548  | 0,003993744 | 0,035383057 | 1,714936037 |
| RPL35A    | 102,1356503  | 272,1812949 | 424,7035726 | 584,6343689 | 622,7971406 | 433,0063976 | 353,055063  | 1,033654767 | 0,35936795  | 2,876313168 | 0,004023503 | 0,035618624 | 2,047203851 |
| STAU1     | 195,6157369  | 198,5477079 | 223,9594402 | 274,2729138 | 280,5392525 | 347,3836636 | 423,5775432 | 0,543612211 | 0,189058391 | 2,875366743 | 0,004035585 | 0,03566936  | 1,457617526 |
| AK4       | 652,6294941  | 760,003809  | 629,544524  | 1103,106412 | 1115,424068 | 894,1459792 | 740,0395438 | 0,60772466  | 0,211495407 | 2,873465042 | 0,00405996  | 0,035856597 | 1,523853973 |
| ERMP1     | 429,3159537  | 403,6698432 | 480,6934326 | 548,5458276 | 671,049892  | 631,1618677 | 549,4295269 | 0,494605791 | 0,172272972 | 2,871058564 | 0,004090997 | 0,03607399  | 1,408935718 |
| QSER1     | 1997,704075  | 2398,35112  | 2459,457023 | 2930,389553 | 3379,936914 | 4376,544889 | 2679,104946 | 0,640187169 | 0,223034659 | 2,870348365 | 0,004100198 | 0,036126764 | 1,558531343 |
| SLC35B4   | 387,7692485  | 423,3931254 | 326,3799159 | 489,6012102 | 572,3000751 | 708,2223283 | 419,2554332 | 0,637852768 | 0,222361591 | 2,868538421 | 0,004123731 | 0,036248823 | 1,556011548 |
| ZNF627    | 29,42891618  | 26,29770965 | 31,40894588 | 40,9003468  | 68,45157761 | 64,82864145 | 31,73831753 | 1,002208612 | 0,349763861 | 2,865386406 | 0,004165007 | 0,036468968 | 2,003064131 |
| APH1B     | 117,7156647  | 105,1908386 | 87,39880593 | 140,745311  | 159,3462954 | 203,0481977 | 134,6530105 | 0,701454928 | 0,244878303 | 2,864504199 | 0,004176626 | 0,036485395 | 1,626143898 |
| CASP1     | 6,924450865  | 10,51908386 | 8,193638056 | 19,24722202 | 20,19882618 | 25,6868202  | 62,40616703 | 1,322963515 | 0,461797909 | 2,864810534 | 0,004172588 | 0,036485395 | 2,501794891 |
| DNAJC13   | 547,0316184  | 919,1049524 | 1164,86221  | 1591,504671 | 1084,003672 | 1784,622413 | 994,3393107 | 0,759815031 | 0,2652397   | 2,864635393 | 0,004174896 | 0,036485395 | 1,693273515 |
| AHS4      | 798,0429622  | 802,0801445 | 1005,086268 | 1201,748425 | 1130,012109 | 1116,765088 | 1187,935663 | 0,403601087 | 0,140952423 | 2,863385227 | 0,004191406 | 0,036557503 | 1,322805626 |
| FAM102B   | 112,5223266  | 127,5438918 | 142,0230596 | 184,0515606 | 189,6445347 | 294,7868413 | 125,5053723 | 0,80360555  | 0,280681531 | 2,863051047 | 0,00419583  | 0,036557503 | 1,745457888 |
| GDE1      | 403,3492629  | 426,0228964 | 596,7699717 | 606,2874937 | 746,2344117 | 729,0164208 | 561,81558   | 0,54380838  | 0,190086058 | 2,860853587 | 0,004225021 | 0,036651651 | 1,457815737 |
| GSR       | 960,7675576  | 1034,814875 | 1066,538554 | 1267,910751 | 1385,863907 | 1542,432394 | 1077,859601 | 0,453938589 | 0,158665191 | 2,860984112 | 0,004223282 | 0,036651651 | 1,369774672 |
| PRKCI     | 386,0381357  | 489,1373996 | 525,7584419 | 626,7376671 | 732,7685276 | 708,2223283 | 633,1774059 | 0,559417346 | 0,195780522 | 2,857369771 | 0,004271679 | 0,036885503 | 1,473673931 |
| PSMB9     | 209,4646387  | 253,7728982 | 243,077929  | 301,9407955 | 356,8459292 | 307,0186604 | 564,7143451 | 0,447686559 | 0,156671136 | 2,857492271 | 0,00427003  | 0,036885503 | 1,363851491 |
| RNF130    | 640,511705   | 568,0305285 | 577,6514829 | 730,1914855 | 1061,560532 | 890,4764335 | 815,5081345 | 0,587593321 | 0,205710671 | 2,856406608 | 0,00428466  | 0,036940907 | 1,502737814 |
| RSPH3     | 38,08447976  | 44,70610641 | 76,47395519 | 104,6567697 | 107,727073  | 113,755918  | 71,85606796 | 1,025825002 | 0,3591314   | 2,856405769 | 0,004284672 | 0,036940907 | 2,036123405 |
| YY1       | 1047,323193  | 1186,026705 | 1289,132387 | 1522,936442 | 1432,994502 | 1636,617441 | 1444,495027 | 0,381301357 | 0,133540009 | 2,855334225 | 0,004299156 | 0,036997841 | 1,302516237 |
| KLHL15    | 60,58894507  | 60,4847322  | 51,89304102 | 99,84496424 | 92,01687483 | 103,9704627 | 79,85249971 | 0,775699113 | 0,27206516  | 2,851151954 | 0,004356115 | 0,037327683 | 1,712019475 |
| C10orf118 | 223,3135404  | 214,3263337 | 189,8192816 | 268,2581569 | 326,5476899 | 463,5859455 | 299,1952186 | 0,754949755 | 0,264838808 | 2,850600942 | 0,00436367  | 0,037363922 | 1,687572818 |

|              |             |             |             |             |              |             |             |             |              |             |             |             |             |
|--------------|-------------|-------------|-------------|-------------|--------------|-------------|-------------|-------------|--------------|-------------|-------------|-------------|-------------|
| STX3         | 368,7270086 | 378,687019  | 368,7137125 | 504,0366267 | 460,0843741  | 675,1964166 | 291,757007  | 0,553816559 | 0,19442261   | 2,84851931  | 0,004392319 | 0,037551986 | 1,46796397  |
| ZNF718       | 0           | 0           | 0           | 3,608854129 | 4,48862804   | 2,446363828 | 24,00513056 | 3,720508019 | 1,30669205   | 2,847272253 | 0,004409563 | 0,037670749 | 13,18209729 |
| C2orf69      | 93,48008668 | 110,4503805 | 155,6791231 | 186,4574633 | 166,0792375  | 222,6191084 | 170,1006713 | 0,669707415 | 0,235302375  | 2,846156631 | 0,004425042 | 0,037688344 | 1,590750323 |
| TRIM5        | 278,7091473 | 218,2709901 | 218,4970148 | 310,3614551 | 399,4878956  | 441,568671  | 265,2145953 | 0,68944838  | 0,242199711  | 2,846611078 | 0,004418731 | 0,037688344 | 1,621666791 |
| OSBP1L1A     | 225,0446531 | 228,790074  | 263,5620241 | 381,3355863 | 364,7010283  | 381,6327572 | 218,8067888 | 0,651440573 | 0,229327141  | 2,840660591 | 0,00450202  | 0,038170333 | 1,570735838 |
| ROBO1        | 257,9357947 | 403,6698432 | 465,6717628 | 532,9074597 | 570,0557611  | 603,0286837 | 408,4945207 | 0,593134396 | 0,208882689  | 2,839557446 | 0,004517616 | 0,038244837 | 1,508520598 |
| N4BP2        | 88,28674853 | 77,57824348 | 90,13001862 | 159,9925331 | 125,6815851  | 143,112284  | 79,07582765 | 0,745193573 | 0,262567035  | 2,838107884 | 0,004538184 | 0,038361144 | 1,676199158 |
| COL5A2       | 199,0779624 | 273,4961804 | 434,262817  | 470,3539882 | 456,7179031  | 587,1273188 | 2627,404329 | 0,735638126 | 0,259315022  | 2,836851181 | 0,004556084 | 0,038466874 | 1,665133821 |
| DDX19A       | 604,158338  | 883,6030444 | 670,5127142 | 1150,021516 | 1086,247986  | 905,1546165 | 850,0197061 | 0,539897895 | 0,190799891  | 2,829655148 | 0,00465982  | 0,039007764 | 1,453869618 |
| CDV3         | 1478,37026  | 1967,068682 | 1670,136557 | 2362,596503 | 2203,916368  | 2605,377477 | 1571,640879 | 0,486643867 | 0,172169654  | 2,826536816 | 0,004705433 | 0,039330982 | 1,401181521 |
| SPATS2L      | 339,2980924 | 406,2996142 | 434,262817  | 638,7671809 | 566,6892901  | 479,4873103 | 472,6423926 | 0,511673475 | 0,181090684  | 2,825509644 | 0,004720547 | 0,039427971 | 1,425703002 |
| NAP1L1       | 2880,57156  | 2790,186994 | 3982,108095 | 4432,875822 | 4516,681966  | 5921,423646 | 5006,749774 | 0,623305992 | 0,220639223  | 2,825000851 | 0,004728049 | 0,039461295 | 1,540401028 |
| HMBBOX1      | 244,086893  | 227,4751885 | 148,8510913 | 269,4611083 | 353,4794582  | 330,2591168 | 217,1053516 | 0,623677825 | 0,220971928  | 2,822430122 | 0,004766121 | 0,039631828 | 1,540798095 |
| MYO1B        | 1822,86169  | 1631,772884 | 1518,554253 | 2549,053967 | 2487,822091  | 2051,27607  | 1622,662492 | 0,511748947 | 0,181301321  | 2,822643229 | 0,004762954 | 0,039631828 | 1,425777587 |
| GOLT1B       | 292,5580491 | 477,3034302 | 412,4131155 | 590,6491258 | 625,0414546  | 523,5218592 | 523,1972379 | 0,552698504 | 0,195869664  | 2,821766743 | 0,00477599  | 0,039684521 | 1,466826773 |
| PEL1         | 152,337919  | 160,4160289 | 166,6039738 | 232,1696156 | 239,0194431  | 227,511836  | 180,707886  | 0,542043379 | 0,192170451  | 2,820638533 | 0,004792817 | 0,039761225 | 1,456033329 |
| C14orf105    | 384,307023  | 545,6774753 | 651,3942254 | 748,2357561 | 791,1206921  | 1066,614629 | 360,3289618 | 0,718575394 | 0,254818116  | 2,819954111 | 0,004803052 | 0,039791654 | 1,645556308 |
| MFSD12       | 20,7733526  | 19,72328224 | 12,29045708 | 36,08854129 | 33,6647103   | 50,15045848 | 24,12189896 | 1,191318827 | 0,422854955  | 2,817322616 | 0,004842586 | 0,040001181 | 2,283614024 |
| ZNF83        | 20,7733526  | 27,61259514 | 23,21530783 | 43,30624955 | 40,39765236  | 59,93591379 | 37,86030021 | 0,992017447 | 0,35221398   | 2,816519226 | 0,004854714 | 0,040071899 | 1,988964391 |
| CCDC14       | 103,866763  | 172,2499982 | 223,9594402 | 281,4906221 | 318,6952909  | 259,3145648 | 188,1667749 | 0,773806138 | 0,275529349  | 2,812063906 | 0,004922472 | 0,039461284 | 1,710960126 |
| SOGA2        | 1365,847933 | 1312,255712 | 1216,755251 | 1530,154151 | 1840,337497  | 2184,602899 | 1721,134014 | 0,512476149 | 0,182455975  | 2,808766057 | 0,004973177 | 0,040661333 | 1,426496442 |
| ZNF367       | 604,158338  | 312,9427449 | 390,563414  | 633,9553754 | 639,6294957  | 757,1496048 | 412,8250918 | 0,639353078 | 0,22775957   | 2,807140349 | 0,004998346 | 0,040807717 | 1,557630542 |
| PPAP2B       | 167,9179335 | 123,5992354 | 117,4421455 | 162,3984358 | 212,0876749  | 236,0741094 | 333,217654  | 0,587271939 | 0,209253422  | 2,806510568 | 0,005008127 | 0,040857878 | 1,502403094 |
| AKT1P        | 330,6425288 | 159,5935077 | 376,9073506 | 507,6454808 | 429,6461349  | 529,6377688 | 259,7033664 | 0,454042977 | 0,1961970093 | 2,803251943 | 0,005059013 | 0,0411833   | 1,369873787 |
| CES2         | 166,1868208 | 182,7690821 | 195,281707  | 247,8079835 | 295,1272936  | 325,3663892 | 218,6734172 | 0,672068536 | 0,239937103  | 2,801019632 | 0,005094142 | 0,041277992 | 1,593355884 |
| HAUS6        | 1019,62539  | 1091,354951 | 1209,92722  | 1432,715089 | 1504,812551  | 1990,116974 | 687,5332718 | 0,568805825 | 0,203068189  | 2,801058246 | 0,005093532 | 0,041277992 | 1,483295281 |
| LOC100190986 | 8,655563582 | 17,09351128 | 60,08667908 | 92,62725598 | 51,61922246  | 85,62273399 | 50,46593566 | 1,401179173 | 0,5002224047 | 2,801103188 | 0,005092823 | 0,041277992 | 2,641173677 |
| NIPBL        | 619,7383525 | 995,3683104 | 920,4186749 | 1014,08801  | 1392,596849  | 1538,762848 | 1324,530859 | 0,636315077 | 0,22717573   | 2,800981759 | 0,00509474  | 0,041277992 | 1,554353963 |
| OCRL         | 76,16895952 | 106,5057241 | 117,4421455 | 193,6751716 | 196,3774768  | 136,9963744 | 113,6722829 | 0,80646447  | 0,287918919  | 2,801012431 | 0,005094256 | 0,041277992 | 1,748920209 |
| TMEM14B      | 657,8228322 | 894,1221282 | 921,7842813 | 1212,574987 | 1081,759358  | 1225,628278 | 924,5246518 | 0,506858997 | 0,180891187  | 2,802010455 | 0,005078523 | 0,041277992 | 1,420953158 |
| PIGB         | 77,90007224 | 134,1183192 | 152,9479104 | 184,0515606 | 187,4002207  | 242,190019  | 147,6699988 | 0,739299079 | 0,263999603  | 2,800379507 | 0,005104256 | 0,041305838 | 1,669364595 |
| TARSL2       | 169,6490462 | 140,6927467 | 103,786082  | 188,8633661 | 212,0876749  | 238,5204733 | 167,8232246 | 0,633752942 | 0,226324488  | 2,800196067 | 0,005107158 | 0,041305838 | 1,551595979 |
| SGPL1        | 373,9203467 | 289,2748062 | 447,9188804 | 635,1583267 | 557,712034   | 464,8091274 | 353,603241  | 0,577879946 | 0,206737351  | 2,795237261 | 0,005186164 | 0,041794379 | 1,492654166 |
| SYPL1        | 668,2095085 | 649,5534285 | 745,6210631 | 941,9109277 | 960,5664006  | 1292,903283 | 749,0998082 | 0,630681897 | 0,225761967  | 2,793570176 | 0,005212972 | 0,041940433 | 1,548296631 |
| C5orf28      | 195,6157369 | 169,6202273 | 161,1415484 | 223,748956  | 259,2182693  | 259,3145658 | 230,8202346 | 0,500787598 | 0,179460638  | 2,790514978 | 0,005262427 | 0,042189592 | 1,414985823 |
| TMEM30A      | 1191,005549 | 1610,734716 | 2047,043908 | 2338,537476 | 2501,287975  | 2261,663359 | 1679,03728  | 0,54952905  | 0,196972298  | 2,789879873 | 0,00527276  | 0,042189592 | 1,463607842 |
| EGLN3        | 46,74004334 | 49,96564834 | 51,89304102 | 83,00364497 | 141,3917833  | 69,72136911 | 49,69919448 | 0,985475473 | 0,353415278  | 2,788434836 | 0,00529634  | 0,042348103 | 1,979965749 |
| C3orf14      | 176,5734971 | 289,2748062 | 285,4117256 | 386,1473918 | 353,4794582  | 397,5341221 | 227,7431571 | 0,591365749 | 0,212260753  | 2,786034352 | 0,005335722 | 0,0424989   | 1,506672386 |
| CORO2A       | 10,3866763  | 10,51908386 | 10,92485074 | 32,47968716 | 17,95451216  | 24,46363828 | 99,45622393 | 1,228299549 | 0,440946715  | 2,785596325 | 0,005342936 | 0,0424989   | 2,342906773 |
| DCBLD2       | 9076,223972 | 7713,118242 | 7271,853775 | 11409,9938  | 10614,483316 | 14126,52793 | 9688,649976 | 0,58740454  | 0,210853736  | 2,785838899 | 0,00533894  | 0,0424989   | 1,502541189 |
| ZNF280D      | 38,08447976 | 59,16984672 | 64,1834981  | 91,4243046  | 78,55099071  | 114,9790999 | 60,87444265 | 0,80390762  | 0,288610332  | 2,785442965 | 0,005345464 | 0,0424989   | 1,745823388 |
| RP56KA6      | 27,69780346 | 11,83396934 | 24,58091417 | 55,33576331 | 35,90902432  | 39,14182125 | 36,50322107 | 1,046168451 | 0,375655956  | 2,784911126 | 0,00535424  | 0,042511728 | 2,065038173 |
| SEPT10       | 1374,503497 | 1049,278615 | 1203,099188 | 1644,434532 | 1564,286872  | 2056,168798 | 1150,832682 | 0,538375597 | 0,193336384  | 2,784657422 | 0,00535843  | 0,042511728 | 1,452336338 |
| PCYOX1       | 389,5003612 | 544,3625898 | 482,059039  | 591,8520772 | 668,805578   | 752,2568772 | 576,9750818 | 0,504500208 | 0,181263556  | 2,783241267 | 0,005381877 | 0,042667611 | 1,418631816 |
| BTRC         | 178,3046098 | 215,6412192 | 243,077929  | 294,7230872 | 332,158475   | 373,0704838 | 258,204842  | 0,647178673 | 0,232923121  | 2,778507652 | 0,005460923 | 0,043118021 | 1,566102537 |
| FTL          | 15907,19475 | 17689,1544  | 20947,03569 | 30622,33024 | 24969,11563  | 33176,36306 | 20131,70061 | 0,702601587 | 0,25289521   | 2,778232082 | 0,005465557 | 0,043118021 | 1,627436877 |
| IFNGR2       | 270,0535838 | 289,2748062 | 396,0258394 | 413,8152735 | 475,7945723  | 535,7536784 | 382,8045701 | 0,574781204 | 0,206883235  | 2,778287976 | 0,005464616 | 0,043118021 | 1,489451558 |
| FAM63B       | 34,62225433 | 53,91030479 | 110,6141138 | 104,6567697 | 113,337858   | 212,8336531 | 121,728294  | 1,102816753 | 0,397019179  | 2,777741758 | 0,00547381  | 0,04312257  | 2,147736127 |
| PSIMCT-1     | 15,58001445 | 10,51908386 | 20,48409514 | 26,46493028 | 24,68745422  | 47,70409465 | 223,9163225 | 1,084536331 | 0,390552004  | 2,776931929 | 0,005487467 | 0,043169611 | 2,120693801 |
| SLC7A2       | 128,102341  | 159,1011434 | 154,3135167 | 202,0958312 | 218,820617   | 298,456387  | 219,2280151 | 0,700307024 | 0,252167429  | 2,777150985 | 0,00548377  | 0,043169611 | 1,624850545 |

|          |             |             |             |             |             |             |             |             |             |             |             |             |             |
|----------|-------------|-------------|-------------|-------------|-------------|-------------|-------------|-------------|-------------|-------------|-------------|-------------|-------------|
| MRPL3    | 5676,318597 | 4214,207972 | 3866,031556 | 6032,801153 | 6979,816603 | 7806,346976 | 5575,748214 | 0,598059166 | 0,215434491 | 2,776060432 | 0,005502198 | 0,043255208 | 1,513678869 |
| SH3BGR12 | 36,35336704 | 40,76144996 | 50,52743468 | 90,22135323 | 83,03961875 | 59,93591379 | 37,23624341 | 0,863627025 | 0,311170841 | 2,775411162 | 0,005513196 | 0,043310354 | 1,819607171 |
| ERCC8    | 1,731112716 | 39,44656448 | 51,89304102 | 78,19183946 | 78,55099071 | 106,4168265 | 56,72167145 | 1,475025239 | 0,53159708  | 2,774705592 | 0,00552517  | 0,043344804 | 2,779885362 |
| MICALCL  | 36,35336704 | 43,39122093 | 53,25864736 | 78,19183946 | 65,08510658 | 88,06909782 | 80,7566588  | 0,786780913 | 0,283675963 | 2,773519844 | 0,005545346 | 0,043442409 | 1,725220678 |
| ARL6IP5  | 1206,585563 | 1243,881667 | 899,9345798 | 1380,98818  | 1620,394723 | 2246,985176 | 957,7365284 | 0,647707203 | 0,233634652 | 2,772307943 | 0,005566035 | 0,043543761 | 1,566676382 |
| ZNF195   | 76,16895952 | 82,83778541 | 57,35546639 | 108,2656239 | 108,84923   | 149,2281935 | 80,75146055 | 0,759996494 | 0,274562715 | 2,768025125 | 0,005639711 | 0,043972332 | 1,693486509 |
| EFR3A    | 1094,063237 | 1317,515254 | 1544,500774 | 1888,633661 | 1833,604554 | 2178,486989 | 1142,209368 | 0,57604428  | 0,20831923  | 2,765199739 | 0,005688795 | 0,044257565 | 1,490756142 |
| KIAA1432 | 384,307023  | 385,2614464 | 335,9391603 | 514,8631891 | 495,9933985 | 655,625506  | 576,182277  | 0,592269208 | 0,214269468 | 2,764132533 | 0,005707435 | 0,044341167 | 1,507616205 |
| CCNH     | 212,9268641 | 353,7041948 | 445,1876677 | 530,501557  | 500,4820265 | 622,5995943 | 551,7056734 | 0,704423689 | 0,254877504 | 2,763773485 | 0,005713719 | 0,044359307 | 1,629493603 |
| EFHA2    | 6,924450865 | 14,46374031 | 30,04333954 | 28,87083303 | 43,76412339 | 58,71273188 | 27,13311884 | 1,324138115 | 0,479356317 | 2,762325371 | 0,005739125 | 0,044495055 | 2,503832608 |
| LIPC     | 12,11778901 | 6,574427414 | 5,462425371 | 20,4501734  | 25,80961123 | 17,1245468  | 20,3724915  | 1,438846811 | 0,52103016  | 2,761542269 | 0,005752907 | 0,04450975  | 2,711040773 |
| MPP5     | 278,7091473 | 362,9083932 | 375,5417442 | 538,9222166 | 396,1214246 | 740,025058  | 357,7588989 | 0,717190106 | 0,259676348 | 2,761861489 | 0,005747285 | 0,04450975  | 1,643976989 |
| PPT2     | 169,6490462 | 199,8625934 | 173,4320055 | 218,9371505 | 268,1955254 | 289,8941136 | 283,4421297 | 0,514459383 | 0,186329704 | 2,761016477 | 0,005762177 | 0,044550788 | 1,428458757 |
| HAVCR1   | 2364,699971 | 2687,625927 | 3430,403133 | 4455,731898 | 4184,523491 | 3783,30166  | 1742,616456 | 0,550150576 | 0,19943755  | 2,758510498 | 0,005806544 | 0,044789416 | 1,464238512 |
| PDHA1    | 782,4629478 | 850,7309073 | 893,1065481 | 1098,294607 | 1107,568969 | 1174,254638 | 1092,139896 | 0,419111142 | 0,151923364 | 2,758701038 | 0,00580316  | 0,044789416 | 1,337103499 |
| SLC25A16 | 100,4045375 | 76,263358   | 121,5389645 | 174,4279496 | 209,8433609 | 123,5413733 | 123,6280677 | 0,770608144 | 0,279584996 | 2,756257147 | 0,005846701 | 0,045018397 | 1,705988763 |
| ACBD6    | 147,1445809 | 261,6622111 | 385,1009886 | 466,745134  | 445,496333  | 431,7832157 | 273,3533435 | 0,754312306 | 0,273871289 | 2,754258431 | 0,00588253  | 0,045232265 | 1,686827336 |
| LCN2     | 5,193338149 | 6,574427414 | 17,75288245 | 26,46493028 | 22,4431402  | 19,57091063 | 277,6149116 | 1,17783857  | 0,427907871 | 2,752551772 | 0,00591328  | 0,045401145 | 2,262375763 |
| METTL6   | 152,337919  | 138,0629757 | 234,8842909 | 259,8374973 | 311,9596488 | 259,3145658 | 230,3691422 | 0,660216741 | 0,239872349 | 2,752367014 | 0,005916617 | 0,045401145 | 1,580320023 |
| KLF10    | 460,4759825 | 590,3835817 | 628,1789176 | 804,7744708 | 664,31695   | 995,6700781 | 569,9084092 | 0,551459076 | 0,200398967 | 2,751805979 | 0,005926762 | 0,045447951 | 1,643976989 |
| ARPC1A   | 1033,474292 | 990,1087685 | 1080,194617 | 1361,740958 | 1202,952315 | 1336,937832 | 1259,046637 | 0,329890034 | 0,12003013  | 2,748393355 | 0,005988808 | 0,045689964 | 1,256917566 |
| NDUFV2   | 431,0470664 | 549,6221318 | 680,0719586 | 781,9183946 | 837,1291295 | 943,0732558 | 723,7861266 | 0,623617627 | 0,226911867 | 2,748281244 | 0,00599086  | 0,045689964 | 1,540733805 |
| PHC3     | 199,0779624 | 380,0019045 | 546,2425371 | 576,2137093 | 638,5073387 | 746,1409676 | 479,2855576 | 0,79755141  | 0,290143445 | 2,748817609 | 0,005981066 | 0,045689964 | 1,738148578 |
| SNX27    | 225,0446531 | 494,3969415 | 442,456455  | 712,1472148 | 595,675593  | 594,4664103 | 523,2884612 | 0,699329119 | 0,254421634 | 2,748701474 | 0,005983185 | 0,045689964 | 1,623749542 |
| EPSTI1   | 0           | 11,83396934 | 2,731212685 | 14,43541652 | 26,93176824 | 13,45500106 | 29,46714003 | 1,829138824 | 0,66610192  | 2,746034457 | 0,006032043 | 0,045848423 | 3,553249081 |
| ROCK1    | 212,9268641 | 202,4923643 | 266,2932368 | 318,7821147 | 317,5704339 | 388,9718487 | 296,6136081 | 0,587431932 | 0,214003385 | 2,744965615 | 0,006051724 | 0,045966914 | 1,502569718 |
| C9orf72  | 12,11778901 | 28,92748062 | 46,43061565 | 62,55347157 | 46,00843741 | 69,72136911 | 54,70555583 | 0,995393972 | 0,362872864 | 2,743092887 | 0,006086347 | 0,046167467 | 1,993624872 |
| IL15RA   | 51,93338149 | 32,87213707 | 47,79622199 | 105,8597211 | 80,79530473 | 58,71273188 | 61,13751449 | 0,897768826 | 0,327531106 | 2,741018211 | 0,006124911 | 0,046397339 | 1,863182154 |
| KCNN3    | 0           | 1,314885483 | 2,731212685 | 4,811805506 | 7,855099071 | 13,45500106 | 21,98589238 | 2,588311831 | 0,945308516 | 2,738060418 | 0,006180272 | 0,046628057 | 6,013945653 |
| SLC4A7   | 69,24450865 | 320,8320578 | 331,8423413 | 559,37239   | 478,0388863 | 462,3627635 | 386,3807652 | 1,049730255 | 0,383374905 | 2,738129805 | 0,006178968 | 0,046628057 | 2,070142751 |
| IRAK1BP1 | 133,2956792 | 144,6374031 | 120,1733582 | 209,3135395 | 177,3008076 | 238,5204733 | 123,0475126 | 0,649833512 | 0,237439265 | 2,736840984 | 0,006203227 | 0,046738466 | 1,568987124 |
| PPIP5K2  | 64,0511705  | 109,1354951 | 204,8409514 | 273,0699624 | 260,3404263 | 189,5931967 | 173,9653909 | 0,928312614 | 0,339248628 | 2,736378389 | 0,006211955 | 0,046741529 | 1,903048875 |
| CDK6     | 261,3980202 | 420,7633545 | 579,0170893 | 608,6933964 | 630,6522397 | 740,025058  | 655,3511723 | 0,646355606 | 0,236235797 | 2,736061231 | 0,006217945 | 0,046755288 | 1,56520932  |
| ZDHHC7   | 773,8073842 | 640,3492301 | 654,1254381 | 818,0069359 | 1127,767795 | 914,9400718 | 610,6016644 | 0,469861776 | 0,171844069 | 2,734233298 | 0,006252573 | 0,046921443 | 1,384976767 |
| GPR137B  | 171,3801589 | 153,8416015 | 182,9912499 | 249,0109349 | 237,8972861 | 228,7350179 | 190,9008426 | 0,494870909 | 0,181134662 | 2,732060788 | 0,006293953 | 0,047168956 | 1,409194656 |
| PRPF8    | 2266,026546 | 2827,003788 | 2399,370344 | 3087,976183 | 3844,509917 | 3426,132541 | 3423,325028 | 0,467025784 | 0,170964973 | 2,731704479 | 0,006300763 | 0,047188514 | 1,38225691  |
| AASDH    | 10,3866763  | 18,40839676 | 28,6777332  | 44,50920093 | 35,90902432 | 39,14182125 | 34,18916544 | 1,02548792  | 0,376323036 | 2,725020317 | 0,006429753 | 0,04786736  | 2,035647724 |
| AP2A1    | 1130,416604 | 807,3396864 | 606,3292161 | 1257,084188 | 1533,988633 | 1261,100553 | 1050,847935 | 0,673229532 | 0,247139311 | 2,724089213 | 0,006447909 | 0,04791129  | 1,594638639 |
| PCBP2    | 16691,38881 | 13741,86818 | 13601,43917 | 17637,67308 | 20588,21466 | 24577,3942  | 20474,30623 | 0,512263378 | 0,188051322 | 2,724061567 | 0,006448448 | 0,04791129  | 1,426286076 |
| NAPEPLD  | 72,70673409 | 51,28053383 | 75,10834885 | 92,62725598 | 124,5594281 | 103,9704627 | 75,86409179 | 0,697608213 | 0,256392427 | 2,720861227 | 0,006511209 | 0,048313686 | 1,621813822 |
| ATF6B    | 886,3297108 | 683,740451  | 568,0922385 | 920,2578029 | 942,6118885 | 1152,237363 | 835,4829774 | 0,498159223 | 0,183131637 | 2,720224819 | 0,006523755 | 0,048374824 | 1,412410277 |
| CANX     | 13331,29903 | 10878,0476  | 10815,60223 | 15450,70748 | 18990,26308 | 13238,49786 | 13483,55351 | 0,445132942 | 0,163717664 | 2,718906025 | 0,006549821 | 0,048504083 | 1,361439565 |
| SSR1     | 1116,567702 | 1438,484718 | 2098,936949 | 2480,485738 | 2205,038525 | 2216,405628 | 1917,105127 | 0,567554494 | 0,209162731 | 2,713458996 | 0,006658481 | 0,049179075 | 1,482009293 |
| CHD1     | 412,0048265 | 813,9141138 | 849,4071451 | 1169,268738 | 996,4754249 | 1705,115588 | 1027,5107   | 0,89783305  | 0,331019171 | 2,712329462 | 0,006681215 | 0,049314566 | 1,863265227 |
| PLAG1    | 0           | 0           | 0           | 3,608854129 | 2,24431402  | 4,892727657 | 18,2130394  | 3,728330287 | 1,375800655 | 2,709934955 | 0,00672964  | 0,049519389 | 13,25376451 |
| SPNS2    | 32,89114161 | 49,96564834 | 23,21530783 | 68,56822845 | 77,42883369 | 75,83727868 | 27,40003969 | 1,05950794  | 0,391006905 | 2,709691127 | 0,006734589 | 0,049519389 | 2,084220535 |
| GLB1     | 164,4557081 | 351,0744239 | 376,9073506 | 454,7156203 | 415,1980937 | 675,1964166 | 504,0714171 | 0,787113066 | 0,290764701 | 2,707044778 | 0,00678851  | 0,04967931  | 1,725617923 |
| SLC37A3  | 373,9203467 | 361,5935077 | 337,3047666 | 483,5864533 | 479,1610433 | 490,4959476 | 292,800621  | 0,438877963 | 0,162143162 | 2,706731243 | 0,006794924 | 0,04967931  | 1,355549656 |
| IGF1R    | 109,0601011 | 148,5820595 | 127,0013899 | 175,630901  | 175,0564936 | 248,3059286 | 292,0688932 | 0,632599699 | 0,233851044 | 2,70513951  | 0,006827571 | 0,049870566 | 1,55035618  |
| DUT      | 386,0381357 | 636,4045736 | 684,1687777 | 745,8298534 | 811,3195183 | 1050,713264 | 879,2252611 | 0,608801386 | 0,225181572 | 2,703602164 | 0,006859236 | 0,049945017 | 1,524991695 |

|      |             |             |             |             |             |             |             |             |             |             |             |             |             |
|------|-------------|-------------|-------------|-------------|-------------|-------------|-------------|-------------|-------------|-------------|-------------|-------------|-------------|
| PUS7 | 31,16002889 | 105,1908386 | 110,6141138 | 166,0072899 | 138,0253122 | 205,4945616 | 104,9429081 | 1,031874895 | 0,381671871 | 2,703565483 | 0,006859993 | 0,049945017 | 2,044679747 |
|------|-------------|-------------|-------------|-------------|-------------|-------------|-------------|-------------|-------------|-------------|-------------|-------------|-------------|
