# Supplementary material for: Analysis of the Role of FRMD5 in the Biology of Papillary Thyroid Carcinoma
Source: MDPI journal article supplement (doi:10.3390/ijms22136726), 2021-06-23
Supplement: s1 [file s1]

**Supplementary Table S5. Gene ontology (GO) enrichment analysis of the upregulated genes in TPC1 siFRMD5 (in comparison with TPC1 siNEG).**

| GOID       | GO Term                                           | Ontology Source                                                 | Term PValue | Term PValue Corrected with Benjamini-Hochberg | Group PValue | Group PValue Corrected with Benjamini-Hochberg | GO Levels | GO Groups | % Associated Genes | Nr. Genes |
|------------|---------------------------------------------------|-----------------------------------------------------------------|-------------|-----------------------------------------------|--------------|------------------------------------------------|-----------|-----------|--------------------|-----------|
| GO:0044248 | cellular catabolic process                        | GO_BiologicalProcess-EBI-UniProt-GOA-ACAP-ARAP_08.05.2020_00h00 | 3,8443E-07  | 0,000253914                                   | 1,7671E-13   | 1,2547E-11                                     | [3]       | Group73   | 5,66               | 138,00    |
| GO:1901575 | organic substance catabolic process               | GO_BiologicalProcess-EBI-UniProt-GOA-ACAP-ARAP_08.05.2020_00h00 | 2,3971E-05  | 0,002261853                                   | 1,7671E-13   | 1,2547E-11                                     | [3]       | Group73   | 5,34               | 126,00    |
| GO:0009894 | regulation of catabolic process                   | GO_BiologicalProcess-EBI-UniProt-GOA-ACAP-ARAP_08.05.2020_00h00 | 0,0005648   | 0,010972164                                   | 1,7671E-13   | 1,2547E-11                                     | [3, 4]    | Group73   | 5,75               | 62,00     |
| GO:0003723 | RNA binding                                       | GO_MolecularFunction-EBI-UniProt-GOA-ACAP-ARAP_08.05.2020_00h00 | 0,00021632  | 0,006969627                                   | 1,7671E-13   | 1,2547E-11                                     | [4]       | Group73   | 5,39               | 94,00     |
| GO:0009057 | macromolecule catabolic process                   | GO_BiologicalProcess-EBI-UniProt-GOA-ACAP-ARAP_08.05.2020_00h00 | 5,3046E-06  | 0,000875914                                   | 1,7671E-13   | 1,2547E-11                                     | [4]       | Group73   | 6,02               | 90,00     |
| GO:0019439 | aromatic compound catabolic process               | GO_BiologicalProcess-EBI-UniProt-GOA-ACAP-ARAP_08.05.2020_00h00 | 0,00160706  | 0,018786948                                   | 1,7671E-13   | 1,2547E-11                                     | [4]       | Group73   | 6,15               | 40,00     |
| GO:0043603 | cellular amide metabolic process                  | GO_BiologicalProcess-EBI-UniProt-GOA-ACAP-ARAP_08.05.2020_00h00 | 1,4828E-05  | 0,001632299                                   | 1,7671E-13   | 1,2547E-11                                     | [4]       | Group73   | 6,22               | 73,00     |
| GO:0044270 | cellular nitrogen compound catabolic process      | GO_BiologicalProcess-EBI-UniProt-GOA-ACAP-ARAP_08.05.2020_00h00 | 0,0018934   | 0,020009467                                   | 1,7671E-13   | 1,2547E-11                                     | [4]       | Group73   | 6,14               | 39,00     |
| GO:0046700 | heterocycle catabolic process                     | GO_BiologicalProcess-EBI-UniProt-GOA-ACAP-ARAP_08.05.2020_00h00 | 0,00169218  | 0,018784598                                   | 1,7671E-13   | 1,2547E-11                                     | [4]       | Group73   | 6,18               | 39,00     |
| GO:1901361 | organic cyclic compound catabolic process         | GO_BiologicalProcess-EBI-UniProt-GOA-ACAP-ARAP_08.05.2020_00h00 | 0,00403709  | 0,02996067                                    | 1,7671E-13   | 1,2547E-11                                     | [4]       | Group73   | 5,84               | 40,00     |
| GO:1901565 | organonitrogen compound catabolic process         | GO_BiologicalProcess-EBI-UniProt-GOA-ACAP-ARAP_08.05.2020_00h00 | 0,0006443   | 0,01165912                                    | 1,7671E-13   | 1,2547E-11                                     | [4]       | Group73   | 5,44               | 77,00     |
| GO:1901566 | organonitrogen compound biosynthetic process      | GO_BiologicalProcess-EBI-UniProt-GOA-ACAP-ARAP_08.05.2020_00h00 | 1,2533E-06  | 0,000331134                                   | 1,7671E-13   | 1,2547E-11                                     | [4]       | Group73   | 5,85               | 112,00    |
| GO:0006518 | peptide metabolic process                         | GO_BiologicalProcess-EBI-UniProt-GOA-ACAP-ARAP_08.05.2020_00h00 | 0,00024483  | 0,007350477                                   | 1,7671E-13   | 1,2547E-11                                     | [4, 5]    | Group73   | 6,17               | 54,00     |
| GO:0030163 | protein catabolic process                         | GO_BiologicalProcess-EBI-UniProt-GOA-ACAP-ARAP_08.05.2020_00h00 | 0,00303904  | 0,025734456                                   | 1,7671E-13   | 1,2547E-11                                     | [4, 5]    | Group73   | 5,50               | 55,00     |
| GO:0031329 | regulation of cellular catabolic process          | GO_BiologicalProcess-EBI-UniProt-GOA-ACAP-ARAP_08.05.2020_00h00 | 0,00029739  | 0,008017297                                   | 1,7671E-13   | 1,2547E-11                                     | [4, 5]    | Group73   | 6,09               | 55,00     |
| GO:0034248 | regulation of cellular amide metabolic process    | GO_BiologicalProcess-EBI-UniProt-GOA-ACAP-ARAP_08.05.2020_00h00 | 0,00235406  | 0,022212256                                   | 1,7671E-13   | 1,2547E-11                                     | [4, 5]    | Group73   | 6,43               | 32,00     |
| GO:0034655 | nucleobase-containing compound catabolic process  | GO_BiologicalProcess-EBI-UniProt-GOA-ACAP-ARAP_08.05.2020_00h00 | 0,00214339  | 0,021288881                                   | 1,7671E-13   | 1,2547E-11                                     | [4, 5]    | Group73   | 6,24               | 36,00     |
| GO:0044265 | cellular macromolecule catabolic process          | GO_BiologicalProcess-EBI-UniProt-GOA-ACAP-ARAP_08.05.2020_00h00 | 5,3207E-06  | 0,000780953                                   | 1,7671E-13   | 1,2547E-11                                     | [4, 5]    | Group73   | 6,28               | 78,00     |
| GO:0043604 | amide biosynthetic process                        | GO_BiologicalProcess-EBI-UniProt-GOA-ACAP-ARAP_08.05.2020_00h00 | 0,0012976   | 0,016971523                                   | 1,7671E-13   | 1,2547E-11                                     | [5]       | Group73   | 5,83               | 51,00     |
| GO:0010608 | posttranscriptional regulation of gene expression | GO_BiologicalProcess-EBI-UniProt-GOA-ACAP-ARAP_08.05.2020_00h00 | 0,00098194  | 0,014740233                                   | 1,7671E-13   | 1,2547E-11                                     | [5, 6]    | Group73   | 6,19               | 43,00     |

|            |                                                                           |                                                                 |            |             |            |            |                 |         |       |        |
|------------|---------------------------------------------------------------------------|-----------------------------------------------------------------|------------|-------------|------------|------------|-----------------|---------|-------|--------|
| GO:0043043 | peptide biosynthetic process                                              | GO_BiologicalProcess-EBI-UniProt-GOA-ACAP-ARAP_08.05.2020_00h00 | 0,00095896 | 0,014730037 | 1,7671E-13 | 1,2547E-11 | [5, 6]          | Group73 | 6,15  | 44,00  |
| GO:0044257 | cellular protein catabolic process                                        | GO_BiologicalProcess-EBI-UniProt-GOA-ACAP-ARAP_08.05.2020_00h00 | 0,00194158 | 0,020037686 | 1,7671E-13 | 1,2547E-11 | [5, 6]          | Group73 | 5,80  | 48,00  |
| GO:0006412 | translation                                                               | GO_BiologicalProcess-EBI-UniProt-GOA-ACAP-ARAP_08.05.2020_00h00 | 0,00240929 | 0,022572109 | 1,7671E-13 | 1,2547E-11 | [5, 6, 7]       | Group73 | 5,98  | 41,00  |
| GO:0051603 | proteolysis involved in cellular protein catabolic process                | GO_BiologicalProcess-EBI-UniProt-GOA-ACAP-ARAP_08.05.2020_00h00 | 0,00850725 | 0,042730317 | 1,7671E-13 | 1,2547E-11 | [5, 6, 7]       | Group73 | 5,52  | 42,00  |
| GO:0006402 | mRNA catabolic process                                                    | GO_BiologicalProcess-EBI-UniProt-GOA-ACAP-ARAP_08.05.2020_00h00 | 7,0249E-05 | 0,004034745 | 1,7671E-13 | 1,2547E-11 | [5, 6, 7, 8]    | Group73 | 7,99  | 31,00  |
| GO:0016071 | mRNA metabolic process                                                    | GO_BiologicalProcess-EBI-UniProt-GOA-ACAP-ARAP_08.05.2020_00h00 | 0,00452181 | 0,03211461  | 1,7671E-13 | 1,2547E-11 | [6, 7]          | Group73 | 5,53  | 49,00  |
| GO:0016441 | posttranscriptional gene silencing                                        | GO_BiologicalProcess-EBI-UniProt-GOA-ACAP-ARAP_08.05.2020_00h00 | 0,00958268 | 0,045209702 | 1,7671E-13 | 1,2547E-11 | [6, 7]          | Group73 | 7,88  | 13,00  |
| GO:0017148 | negative regulation of translation                                        | GO_BiologicalProcess-EBI-UniProt-GOA-ACAP-ARAP_08.05.2020_00h00 | 0,00273635 | 0,024423774 | 1,7671E-13 | 1,2547E-11 | [5, 6, 7, 8, 9] | Group73 | 9,15  | 13,00  |
| GO:0061013 | regulation of mRNA catabolic process                                      | GO_BiologicalProcess-EBI-UniProt-GOA-ACAP-ARAP_08.05.2020_00h00 | 0,0054584  | 0,034833573 | 1,7671E-13 | 1,2547E-11 | [5, 6, 7, 8, 9] | Group73 | 7,69  | 16,00  |
| GO:0000956 | nuclear-transcribed mRNA catabolic process                                | GO_BiologicalProcess-EBI-UniProt-GOA-ACAP-ARAP_08.05.2020_00h00 | 0,00023791 | 0,007308858 | 1,7671E-13 | 1,2547E-11 | [6, 7, 8, 9]    | Group73 | 9,13  | 20,00  |
| GO:0000288 | nuclear-transcribed mRNA catabolic process, deadenylation-dependent decay | GO_BiologicalProcess-EBI-UniProt-GOA-ACAP-ARAP_08.05.2020_00h00 | 0,00059753 | 0,011117499 | 1,7671E-13 | 1,2547E-11 | [7, 8, 9, 10]   | Group73 | 12,99 | 10,00  |
| GO:0043928 | exonucleolytic catabolism of deadenylated mRNA                            | GO_BiologicalProcess-EBI-UniProt-GOA-ACAP-ARAP_08.05.2020_00h00 | 0,00128489 | 0,016973414 | 1,7671E-13 | 1,2547E-11 | [8, 9, 10, 11]  | Group73 | 18,18 | 6,00   |
| GO:0019787 | ubiquitin-like protein transferase activity                               | GO_MolecularFunction-EBI-UniProt-GOA-ACAP-ARAP_08.05.2020_00h00 | 0,00464497 | 0,032638337 | 1,3695E-07 | 4,8616E-06 | [3]             | Group72 | 6,14  | 32,00  |
| GO:0044248 | cellular catabolic process                                                | GO_BiologicalProcess-EBI-UniProt-GOA-ACAP-ARAP_08.05.2020_00h00 | 3,8443E-07 | 0,000253914 | 1,3695E-07 | 4,8616E-06 | [3]             | Group72 | 5,66  | 138,00 |
| GO:1901575 | organic substance catabolic process                                       | GO_BiologicalProcess-EBI-UniProt-GOA-ACAP-ARAP_08.05.2020_00h00 | 2,3971E-05 | 0,002261853 | 1,3695E-07 | 4,8616E-06 | [3]             | Group72 | 5,34  | 126,00 |
| GO:0006914 | autophagy                                                                 | GO_BiologicalProcess-EBI-UniProt-GOA-ACAP-ARAP_08.05.2020_00h00 | 0,00152075 | 0,018098343 | 1,3695E-07 | 4,8616E-06 | [3, 4]          | Group72 | 6,42  | 35,00  |
| GO:0009894 | regulation of catabolic process                                           | GO_BiologicalProcess-EBI-UniProt-GOA-ACAP-ARAP_08.05.2020_00h00 | 0,0005648  | 0,010972164 | 1,3695E-07 | 4,8616E-06 | [3, 4]          | Group72 | 5,75  | 62,00  |
| GO:0009057 | macromolecule catabolic process                                           | GO_BiologicalProcess-EBI-UniProt-GOA-ACAP-ARAP_08.05.2020_00h00 | 5,3046E-06 | 0,000875914 | 1,3695E-07 | 4,8616E-06 | [4]             | Group72 | 6,02  | 90,00  |
| GO:0009896 | positive regulation of catabolic process                                  | GO_BiologicalProcess-EBI-UniProt-GOA-ACAP-ARAP_08.05.2020_00h00 | 0,00740365 | 0,039436366 | 1,3695E-07 | 4,8616E-06 | [3, 4, 5]       | Group72 | 6,11  | 29,00  |
| GO:1901565 | organonitrogen compound catabolic process                                 | GO_BiologicalProcess-EBI-UniProt-GOA-ACAP-ARAP_08.05.2020_00h00 | 0,0006443  | 0,01165912  | 1,3695E-07 | 4,8616E-06 | [4]             | Group72 | 5,44  | 77,00  |
| GO:0016236 | macroautophagy                                                            | GO_BiologicalProcess-EBI-UniProt-GOA-ACAP-ARAP_08.05.2020_00h00 | 0,00066954 | 0,011952255 | 1,3695E-07 | 4,8616E-06 | [4, 5]          | Group72 | 7,77  | 24,00  |
| GO:0030163 | protein catabolic process                                                 | GO_BiologicalProcess-EBI-UniProt-GOA-ACAP-ARAP_08.05.2020_00h00 | 0,00303904 | 0,025734456 | 1,3695E-07 | 4,8616E-06 | [4, 5]          | Group72 | 5,50  | 55,00  |
| GO:0031329 | regulation of cellular catabolic process                                  | GO_BiologicalProcess-EBI-UniProt-GOA-ACAP-ARAP_08.05.2020_00h00 | 0,00029739 | 0,008017297 | 1,3695E-07 | 4,8616E-06 | [4, 5]          | Group72 | 6,09  | 55,00  |

|            |                                                            |                                                                 |            |             |            |            |                 |         |      |        |
|------------|------------------------------------------------------------|-----------------------------------------------------------------|------------|-------------|------------|------------|-----------------|---------|------|--------|
| GO:0044265 | cellular macromolecule catabolic process                   | GO_BiologicalProcess-EBI-UniProt-GOA-ACAP-ARAP_08.05.2020_00h00 | 5,3207E-06 | 0,000780953 | 1,3695E-07 | 4,8616E-06 | [4, 5]          | Group72 | 6,28 | 78,00  |
| GO:0010506 | regulation of autophagy                                    | GO_BiologicalProcess-EBI-UniProt-GOA-ACAP-ARAP_08.05.2020_00h00 | 0,01094008 | 0,048496123 | 1,3695E-07 | 4,8616E-06 | [4, 5, 6]       | Group72 | 6,32 | 23,00  |
| GO:0031331 | positive regulation of cellular catabolic process          | GO_BiologicalProcess-EBI-UniProt-GOA-ACAP-ARAP_08.05.2020_00h00 | 0,00992724 | 0,046338815 | 1,3695E-07 | 4,8616E-06 | [4, 5, 6]       | Group72 | 6,22 | 25,00  |
| GO:0010508 | positive regulation of autophagy                           | GO_BiologicalProcess-EBI-UniProt-GOA-ACAP-ARAP_08.05.2020_00h00 | 0,00496658 | 0,033645403 | 1,3695E-07 | 4,8616E-06 | [4, 5, 6, 7]    | Group72 | 8,89 | 12,00  |
| GO:0044257 | cellular protein catabolic process                         | GO_BiologicalProcess-EBI-UniProt-GOA-ACAP-ARAP_08.05.2020_00h00 | 0,00194158 | 0,020037686 | 1,3695E-07 | 4,8616E-06 | [5, 6]          | Group72 | 5,80 | 48,00  |
| GO:0051603 | proteolysis involved in cellular protein catabolic process | GO_BiologicalProcess-EBI-UniProt-GOA-ACAP-ARAP_08.05.2020_00h00 | 0,00850725 | 0,042730317 | 1,3695E-07 | 4,8616E-06 | [5, 6, 7]       | Group72 | 5,52 | 42,00  |
| GO:0061013 | regulation of mRNA catabolic process                       | GO_BiologicalProcess-EBI-UniProt-GOA-ACAP-ARAP_08.05.2020_00h00 | 0,0054584  | 0,034833573 | 1,3695E-07 | 4,8616E-06 | [5, 6, 7, 8, 9] | Group72 | 7,69 | 16,00  |
| GO:0048519 | negative regulation of biological process                  | GO_BiologicalProcess-EBI-UniProt-GOA-ACAP-ARAP_08.05.2020_00h00 | 0,00014397 | 0,005943411 | 3,1494E-07 | 7,4537E-06 | [1, 2, 3]       | Group74 | 4,54 | 261,00 |
| GO:0019222 | regulation of metabolic process                            | GO_BiologicalProcess-EBI-UniProt-GOA-ACAP-ARAP_08.05.2020_00h00 | 0,00011434 | 0,005208334 | 3,1494E-07 | 7,4537E-06 | [2, 3]          | Group74 | 4,41 | 322,00 |
| GO:0023051 | regulation of signaling                                    | GO_BiologicalProcess-EBI-UniProt-GOA-ACAP-ARAP_08.05.2020_00h00 | 0,00546368 | 0,034699596 | 3,1494E-07 | 7,4537E-06 | [2, 3]          | Group74 | 4,48 | 172,00 |
| GO:0048583 | regulation of response to stimulus                         | GO_BiologicalProcess-EBI-UniProt-GOA-ACAP-ARAP_08.05.2020_00h00 | 0,00220964 | 0,021462729 | 3,1494E-07 | 7,4537E-06 | [2, 3]          | Group74 | 4,48 | 203,00 |
| GO:0006725 | cellular aromatic compound metabolic process               | GO_BiologicalProcess-EBI-UniProt-GOA-ACAP-ARAP_08.05.2020_00h00 | 0,01084506 | 0,048563812 | 3,1494E-07 | 7,4537E-06 | [3]             | Group74 | 4,23 | 258,00 |
| GO:0006793 | phosphorus metabolic process                               | GO_BiologicalProcess-EBI-UniProt-GOA-ACAP-ARAP_08.05.2020_00h00 | 0,00139501 | 0,01789129  | 3,1494E-07 | 7,4537E-06 | [3]             | Group74 | 4,66 | 164,00 |
| GO:0009892 | negative regulation of metabolic process                   | GO_BiologicalProcess-EBI-UniProt-GOA-ACAP-ARAP_08.05.2020_00h00 | 4,5316E-05 | 0,003150687 | 3,1494E-07 | 7,4537E-06 | [2, 3, 4]       | Group74 | 4,97 | 169,00 |
| GO:0010033 | response to organic substance                              | GO_BiologicalProcess-EBI-UniProt-GOA-ACAP-ARAP_08.05.2020_00h00 | 7,0786E-05 | 0,003896196 | 3,1494E-07 | 7,4537E-06 | [3]             | Group74 | 4,91 | 173,00 |
| GO:0023057 | negative regulation of signaling                           | GO_BiologicalProcess-EBI-UniProt-GOA-ACAP-ARAP_08.05.2020_00h00 | 0,00616829 | 0,036376402 | 3,1494E-07 | 7,4537E-06 | [2, 3, 4]       | Group74 | 5,01 | 76,00  |
| GO:0034641 | cellular nitrogen compound metabolic process               | GO_BiologicalProcess-EBI-UniProt-GOA-ACAP-ARAP_08.05.2020_00h00 | 0,00062952 | 0,011549957 | 3,1494E-07 | 7,4537E-06 | [3]             | Group74 | 4,38 | 290,00 |
| GO:0043170 | macromolecule metabolic process                            | GO_BiologicalProcess-EBI-UniProt-GOA-ACAP-ARAP_08.05.2020_00h00 | 0,00100883 | 0,014807319 | 3,1494E-07 | 7,4537E-06 | [3]             | Group74 | 4,17 | 410,00 |
| GO:0044093 | positive regulation of molecular function                  | GO_BiologicalProcess-EBI-UniProt-GOA-ACAP-ARAP_08.05.2020_00h00 | 6,4609E-05 | 0,004064203 | 3,1494E-07 | 7,4537E-06 | [3]             | Group74 | 5,42 | 106,00 |
| GO:0044249 | cellular biosynthetic process                              | GO_BiologicalProcess-EBI-UniProt-GOA-ACAP-ARAP_08.05.2020_00h00 | 9,566E-05  | 0,004680266 | 3,1494E-07 | 7,4537E-06 | [3]             | Group74 | 4,51 | 284,00 |
| GO:0046483 | heterocycle metabolic process                              | GO_BiologicalProcess-EBI-UniProt-GOA-ACAP-ARAP_08.05.2020_00h00 | 0,00909393 | 0,044165753 | 3,1494E-07 | 7,4537E-06 | [3]             | Group74 | 4,25 | 257,00 |
| GO:0048522 | positive regulation of cellular process                    | GO_BiologicalProcess-EBI-UniProt-GOA-ACAP-ARAP_08.05.2020_00h00 | 0,01040585 | 0,047237542 | 3,1494E-07 | 7,4537E-06 | [2, 3, 4]       | Group74 | 4,24 | 253,00 |
| GO:0048523 | negative regulation of cellular process                    | GO_BiologicalProcess-EBI-UniProt-GOA-ACAP-ARAP_08.05.2020_00h00 | 0,00153646 | 0,018122019 | 3,1494E-07 | 7,4537E-06 | [2, 3, 4]       | Group74 | 4,45 | 230,00 |

|            |                                                        |                                                                 |            |             |            |            |           |         |      |        |
|------------|--------------------------------------------------------|-----------------------------------------------------------------|------------|-------------|------------|------------|-----------|---------|------|--------|
| GO:0048585 | negative regulation of response to stimulus            | GO_BiologicalProcess-EBI-UniProt-GOA-ACAP-ARAP_08.05.2020_00h00 | 0,00602008 | 0,035984259 | 3,1494E-07 | 7,4537E-06 | [2, 3, 4] | Group74 | 4,91 | 86,00  |
| GO:0050790 | regulation of catalytic activity                       | GO_BiologicalProcess-EBI-UniProt-GOA-ACAP-ARAP_08.05.2020_00h00 | 0,00041041 | 0,009511445 | 3,1494E-07 | 7,4537E-06 | [3]       | Group74 | 5,00 | 127,00 |
| GO:0070887 | cellular response to chemical stimulus                 | GO_BiologicalProcess-EBI-UniProt-GOA-ACAP-ARAP_08.05.2020_00h00 | 0,00076148 | 0,012573871 | 3,1494E-07 | 7,4537E-06 | [3]       | Group74 | 4,71 | 167,00 |
| GO:1901360 | organic cyclic compound metabolic process              | GO_BiologicalProcess-EBI-UniProt-GOA-ACAP-ARAP_08.05.2020_00h00 | 0,00144468 | 0,01783571  | 3,1494E-07 | 7,4537E-06 | [3]       | Group74 | 4,35 | 276,00 |
| GO:1901564 | organonitrogen compound metabolic process              | GO_BiologicalProcess-EBI-UniProt-GOA-ACAP-ARAP_08.05.2020_00h00 | 8,9487E-10 | 1,18213E-06 | 3,1494E-07 | 7,4537E-06 | [3]       | Group74 | 4,86 | 343,00 |
| GO:1901576 | organic substance biosynthetic process                 | GO_BiologicalProcess-EBI-UniProt-GOA-ACAP-ARAP_08.05.2020_00h00 | 6,6861E-06 | 0,000883237 | 3,1494E-07 | 7,4537E-06 | [3]       | Group74 | 4,62 | 296,00 |
| GO:0009889 | regulation of biosynthetic process                     | GO_BiologicalProcess-EBI-UniProt-GOA-ACAP-ARAP_08.05.2020_00h00 | 0,0029225  | 0,025398796 | 3,1494E-07 | 7,4537E-06 | [3, 4]    | Group74 | 4,46 | 201,00 |
| GO:0010646 | regulation of cell communication                       | GO_BiologicalProcess-EBI-UniProt-GOA-ACAP-ARAP_08.05.2020_00h00 | 0,00593206 | 0,036111753 | 3,1494E-07 | 7,4537E-06 | [3, 4]    | Group74 | 4,48 | 170,00 |
| GO:0019538 | protein metabolic process                              | GO_BiologicalProcess-EBI-UniProt-GOA-ACAP-ARAP_08.05.2020_00h00 | 9,7509E-06 | 0,001170999 | 3,1494E-07 | 7,4537E-06 | [3, 4]    | Group74 | 4,64 | 282,00 |
| GO:0031323 | regulation of cellular metabolic process               | GO_BiologicalProcess-EBI-UniProt-GOA-ACAP-ARAP_08.05.2020_00h00 | 0,00034921 | 0,008871378 | 3,1494E-07 | 7,4537E-06 | [3, 4]    | Group74 | 4,42 | 290,00 |
| GO:0044260 | cellular macromolecule metabolic process               | GO_BiologicalProcess-EBI-UniProt-GOA-ACAP-ARAP_08.05.2020_00h00 | 0,0004098  | 0,009667003 | 3,1494E-07 | 7,4537E-06 | [3, 4]    | Group74 | 4,28 | 366,00 |
| GO:0051171 | regulation of nitrogen compound metabolic process      | GO_BiologicalProcess-EBI-UniProt-GOA-ACAP-ARAP_08.05.2020_00h00 | 0,00046425 | 0,009734524 | 3,1494E-07 | 7,4537E-06 | [3, 4]    | Group74 | 4,43 | 273,00 |
| GO:0060255 | regulation of macromolecule metabolic process          | GO_BiologicalProcess-EBI-UniProt-GOA-ACAP-ARAP_08.05.2020_00h00 | 0,00015088 | 0,006039631 | 3,1494E-07 | 7,4537E-06 | [3, 4]    | Group74 | 4,45 | 299,00 |
| GO:0080090 | regulation of primary metabolic process                | GO_BiologicalProcess-EBI-UniProt-GOA-ACAP-ARAP_08.05.2020_00h00 | 0,00031975 | 0,008282149 | 3,1494E-07 | 7,4537E-06 | [3, 4]    | Group74 | 4,44 | 282,00 |
| GO:0080134 | regulation of response to stress                       | GO_BiologicalProcess-EBI-UniProt-GOA-ACAP-ARAP_08.05.2020_00h00 | 3,1639E-05 | 0,002458551 | 3,1494E-07 | 7,4537E-06 | [3, 4]    | Group74 | 5,76 | 89,00  |
| GO:0006796 | phosphate-containing compound metabolic process        | GO_BiologicalProcess-EBI-UniProt-GOA-ACAP-ARAP_08.05.2020_00h00 | 0,00248995 | 0,023001596 | 3,1494E-07 | 7,4537E-06 | [4]       | Group74 | 4,61 | 161,00 |
| GO:0007166 | cell surface receptor signaling pathway                | GO_BiologicalProcess-EBI-UniProt-GOA-ACAP-ARAP_08.05.2020_00h00 | 0,01122932 | 0,049446441 | 3,1494E-07 | 7,4537E-06 | [3, 4, 5] | Group74 | 4,47 | 150,00 |
| GO:0009059 | macromolecule biosynthetic process                     | GO_BiologicalProcess-EBI-UniProt-GOA-ACAP-ARAP_08.05.2020_00h00 | 0,00712991 | 0,038759742 | 3,1494E-07 | 7,4537E-06 | [4]       | Group74 | 4,32 | 226,00 |
| GO:0009890 | negative regulation of biosynthetic process            | GO_BiologicalProcess-EBI-UniProt-GOA-ACAP-ARAP_08.05.2020_00h00 | 0,0074441  | 0,039492581 | 3,1494E-07 | 7,4537E-06 | [3, 4, 5] | Group74 | 4,88 | 85,00  |
| GO:0009966 | regulation of signal transduction                      | GO_BiologicalProcess-EBI-UniProt-GOA-ACAP-ARAP_08.05.2020_00h00 | 0,00407019 | 0,030037535 | 3,1494E-07 | 7,4537E-06 | [3, 4, 5] | Group74 | 4,59 | 151,00 |
| GO:0010467 | gene expression                                        | GO_BiologicalProcess-EBI-UniProt-GOA-ACAP-ARAP_08.05.2020_00h00 | 0,00333153 | 0,026999731 | 3,1494E-07 | 7,4537E-06 | [4]       | Group74 | 4,32 | 259,00 |
| GO:0010605 | negative regulation of macromolecule metabolic process | GO_BiologicalProcess-EBI-UniProt-GOA-ACAP-ARAP_08.05.2020_00h00 | 0,00010225 | 0,004824166 | 3,1494E-07 | 7,4537E-06 | [3, 4, 5] | Group74 | 4,97 | 155,00 |
| GO:0010648 | negative regulation of cell communication              | GO_BiologicalProcess-EBI-UniProt-GOA-ACAP-ARAP_08.05.2020_00h00 | 0,00588365 | 0,035982855 | 3,1494E-07 | 7,4537E-06 | [3, 4, 5] | Group74 | 5,02 | 76,00  |

|            |                                                            |                                                                 |            |             |            |            |              |         |      |        |
|------------|------------------------------------------------------------|-----------------------------------------------------------------|------------|-------------|------------|------------|--------------|---------|------|--------|
| GO:0031324 | negative regulation of cellular metabolic process          | GO_BiologicalProcess-EBI-UniProt-GOA-ACAP-ARAP_08.05.2020_00h00 | 0,00378904 | 0,029100727 | 3,1494E-07 | 7,4537E-06 | [3, 4, 5]    | Group74 | 4,69 | 131,00 |
| GO:0034097 | response to cytokine                                       | GO_BiologicalProcess-EBI-UniProt-GOA-ACAP-ARAP_08.05.2020_00h00 | 0,00028832 | 0,00793489  | 3,1494E-07 | 7,4537E-06 | [4]          | Group74 | 5,68 | 72,00  |
| GO:0035556 | intracellular signal transduction                          | GO_BiologicalProcess-EBI-UniProt-GOA-ACAP-ARAP_08.05.2020_00h00 | 0,00738036 | 0,039471455 | 3,1494E-07 | 7,4537E-06 | [3, 4, 5]    | Group74 | 4,57 | 137,00 |
| GO:0043085 | positive regulation of catalytic activity                  | GO_BiologicalProcess-EBI-UniProt-GOA-ACAP-ARAP_08.05.2020_00h00 | 0,00046043 | 0,009810138 | 3,1494E-07 | 7,4537E-06 | [4]          | Group74 | 5,39 | 85,00  |
| GO:0043412 | macromolecule modification                                 | GO_BiologicalProcess-EBI-UniProt-GOA-ACAP-ARAP_08.05.2020_00h00 | 0,00070997 | 0,012505024 | 3,1494E-07 | 7,4537E-06 | [4]          | Group74 | 4,56 | 210,00 |
| GO:0044271 | cellular nitrogen compound biosynthetic process            | GO_BiologicalProcess-EBI-UniProt-GOA-ACAP-ARAP_08.05.2020_00h00 | 0,00350894 | 0,027756326 | 3,1494E-07 | 7,4537E-06 | [4]          | Group74 | 4,39 | 223,00 |
| GO:0051172 | negative regulation of nitrogen compound metabolic process | GO_BiologicalProcess-EBI-UniProt-GOA-ACAP-ARAP_08.05.2020_00h00 | 0,0032815  | 0,027092896 | 3,1494E-07 | 7,4537E-06 | [3, 4, 5]    | Group74 | 4,75 | 122,00 |
| GO:0051336 | regulation of hydrolase activity                           | GO_BiologicalProcess-EBI-UniProt-GOA-ACAP-ARAP_08.05.2020_00h00 | 0,00553121 | 0,034960426 | 3,1494E-07 | 7,4537E-06 | [4]          | Group74 | 5,10 | 70,00  |
| GO:0051338 | regulation of transferase activity                         | GO_BiologicalProcess-EBI-UniProt-GOA-ACAP-ARAP_08.05.2020_00h00 | 0,00758439 | 0,039916255 | 3,1494E-07 | 7,4537E-06 | [4]          | Group74 | 5,22 | 57,00  |
| GO:0070848 | response to growth factor                                  | GO_BiologicalProcess-EBI-UniProt-GOA-ACAP-ARAP_08.05.2020_00h00 | 0,00339685 | 0,02719537  | 3,1494E-07 | 7,4537E-06 | [4]          | Group74 | 5,76 | 44,00  |
| GO:0071310 | cellular response to organic substance                     | GO_BiologicalProcess-EBI-UniProt-GOA-ACAP-ARAP_08.05.2020_00h00 | 0,00166787 | 0,018831223 | 3,1494E-07 | 7,4537E-06 | [4]          | Group74 | 4,76 | 138,00 |
| GO:1901362 | organic cyclic compound biosynthetic process               | GO_BiologicalProcess-EBI-UniProt-GOA-ACAP-ARAP_08.05.2020_00h00 | 0,00641481 | 0,037495423 | 3,1494E-07 | 7,4537E-06 | [4]          | Group74 | 4,39 | 201,00 |
| GO:1901566 | organonitrogen compound biosynthetic process               | GO_BiologicalProcess-EBI-UniProt-GOA-ACAP-ARAP_08.05.2020_00h00 | 1,2533E-06 | 0,000331134 | 3,1494E-07 | 7,4537E-06 | [4]          | Group74 | 5,85 | 112,00 |
| GO:0009968 | negative regulation of signal transduction                 | GO_BiologicalProcess-EBI-UniProt-GOA-ACAP-ARAP_08.05.2020_00h00 | 0,00563198 | 0,035093613 | 3,1494E-07 | 7,4537E-06 | [3, 4, 5, 6] | Group74 | 5,11 | 69,00  |
| GO:0010468 | regulation of gene expression                              | GO_BiologicalProcess-EBI-UniProt-GOA-ACAP-ARAP_08.05.2020_00h00 | 0,0051635  | 0,03410491  | 3,1494E-07 | 7,4537E-06 | [4, 5]       | Group74 | 4,36 | 221,00 |
| GO:0034645 | cellular macromolecule biosynthetic process                | GO_BiologicalProcess-EBI-UniProt-GOA-ACAP-ARAP_08.05.2020_00h00 | 0,00412162 | 0,030248124 | 3,1494E-07 | 7,4537E-06 | [4, 5]       | Group74 | 4,38 | 222,00 |
| GO:0044267 | cellular protein metabolic process                         | GO_BiologicalProcess-EBI-UniProt-GOA-ACAP-ARAP_08.05.2020_00h00 | 3,9564E-07 | 0,000174212 | 3,1494E-07 | 7,4537E-06 | [4, 5]       | Group74 | 4,86 | 266,00 |
| GO:0051246 | regulation of protein metabolic process                    | GO_BiologicalProcess-EBI-UniProt-GOA-ACAP-ARAP_08.05.2020_00h00 | 3,0554E-06 | 0,000672698 | 3,1494E-07 | 7,4537E-06 | [4, 5]       | Group74 | 5,28 | 159,00 |
| GO:0007167 | enzyme linked receptor protein signaling pathway           | GO_BiologicalProcess-EBI-UniProt-GOA-ACAP-ARAP_08.05.2020_00h00 | 0,00289324 | 0,025311073 | 3,1494E-07 | 7,4537E-06 | [4, 5, 6]    | Group74 | 5,41 | 60,00  |
| GO:0010558 | negative regulation of macromolecule biosynthetic process  | GO_BiologicalProcess-EBI-UniProt-GOA-ACAP-ARAP_08.05.2020_00h00 | 0,00486912 | 0,033500541 | 3,1494E-07 | 7,4537E-06 | [4, 5, 6]    | Group74 | 4,99 | 82,00  |
| GO:0010629 | negative regulation of gene expression                     | GO_BiologicalProcess-EBI-UniProt-GOA-ACAP-ARAP_08.05.2020_00h00 | 0,00042099 | 0,009425861 | 3,1494E-07 | 7,4537E-06 | [4, 5, 6]    | Group74 | 5,08 | 115,00 |
| GO:0016310 | phosphorylation                                            | GO_BiologicalProcess-EBI-UniProt-GOA-ACAP-ARAP_08.05.2020_00h00 | 0,00926835 | 0,044521775 | 3,1494E-07 | 7,4537E-06 | [5]          | Group74 | 4,62 | 119,00 |
| GO:0019221 | cytokine-mediated signaling pathway                        | GO_BiologicalProcess-EBI-UniProt-GOA-ACAP-ARAP_08.05.2020_00h00 | 0,00074874 | 0,012520107 | 3,1494E-07 | 7,4537E-06 | [4, 5, 6]    | Group74 | 6,01 | 50,00  |

|            |                                                                    |                                                                 |            |             |            |            |                 |         |      |        |
|------------|--------------------------------------------------------------------|-----------------------------------------------------------------|------------|-------------|------------|------------|-----------------|---------|------|--------|
| GO:0031098 | stress-activated protein kinase signaling cascade                  | GO_BiologicalProcess-EBI-UniProt-GOA-ACAP-ARAP_08.05.2020_00h00 | 0,00570056 | 0,035188999 | 3,1494E-07 | 7,4537E-06 | [4, 5, 6]       | Group74 | 6,79 | 22,00  |
| GO:0032268 | regulation of cellular protein metabolic process                   | GO_BiologicalProcess-EBI-UniProt-GOA-ACAP-ARAP_08.05.2020_00h00 | 4,4564E-06 | 0,000840978 | 3,1494E-07 | 7,4537E-06 | [4, 5, 6]       | Group74 | 5,31 | 150,00 |
| GO:0051247 | positive regulation of protein metabolic process                   | GO_BiologicalProcess-EBI-UniProt-GOA-ACAP-ARAP_08.05.2020_00h00 | 0,00532142 | 0,034290701 | 3,1494E-07 | 7,4537E-06 | [4, 5, 6]       | Group74 | 4,90 | 90,00  |
| GO:0051248 | negative regulation of protein metabolic process                   | GO_BiologicalProcess-EBI-UniProt-GOA-ACAP-ARAP_08.05.2020_00h00 | 0,00654348 | 0,037582349 | 3,1494E-07 | 7,4537E-06 | [4, 5, 6]       | Group74 | 5,19 | 61,00  |
| GO:0051347 | positive regulation of transferase activity                        | GO_BiologicalProcess-EBI-UniProt-GOA-ACAP-ARAP_08.05.2020_00h00 | 0,00168055 | 0,018813601 | 3,1494E-07 | 7,4537E-06 | [5]             | Group74 | 5,94 | 45,00  |
| GO:0071345 | cellular response to cytokine stimulus                             | GO_BiologicalProcess-EBI-UniProt-GOA-ACAP-ARAP_08.05.2020_00h00 | 0,00042874 | 0,009439493 | 3,1494E-07 | 7,4537E-06 | [5]             | Group74 | 5,70 | 67,00  |
| GO:0071363 | cellular response to growth factor stimulus                        | GO_BiologicalProcess-EBI-UniProt-GOA-ACAP-ARAP_08.05.2020_00h00 | 0,00730586 | 0,039553437 | 3,1494E-07 | 7,4537E-06 | [5]             | Group74 | 5,60 | 41,00  |
| GO:1902531 | regulation of intracellular signal transduction                    | GO_BiologicalProcess-EBI-UniProt-GOA-ACAP-ARAP_08.05.2020_00h00 | 0,00851008 | 0,042582653 | 3,1494E-07 | 7,4537E-06 | [4, 5, 6]       | Group74 | 4,80 | 92,00  |
| GO:0023014 | signal transduction by protein phosphorylation                     | GO_BiologicalProcess-EBI-UniProt-GOA-ACAP-ARAP_08.05.2020_00h00 | 0,00262072 | 0,023875622 | 3,1494E-07 | 7,4537E-06 | [3, 4, 5, 7, 8] | Group74 | 5,54 | 55,00  |
| GO:0006464 | cellular protein modification process                              | GO_BiologicalProcess-EBI-UniProt-GOA-ACAP-ARAP_08.05.2020_00h00 | 0,00040415 | 0,009706852 | 3,1494E-07 | 7,4537E-06 | [5, 6]          | Group74 | 4,63 | 203,00 |
| GO:0032269 | negative regulation of cellular protein metabolic process          | GO_BiologicalProcess-EBI-UniProt-GOA-ACAP-ARAP_08.05.2020_00h00 | 0,00601296 | 0,036105122 | 3,1494E-07 | 7,4537E-06 | [4, 5, 6, 7]    | Group74 | 5,26 | 58,00  |
| GO:0032270 | positive regulation of cellular protein metabolic process          | GO_BiologicalProcess-EBI-UniProt-GOA-ACAP-ARAP_08.05.2020_00h00 | 0,00477472 | 0,033196837 | 3,1494E-07 | 7,4537E-06 | [4, 5, 6, 7]    | Group74 | 4,96 | 85,00  |
| GO:2000112 | regulation of cellular macromolecule biosynthetic process          | GO_BiologicalProcess-EBI-UniProt-GOA-ACAP-ARAP_08.05.2020_00h00 | 0,00792705 | 0,041226882 | 3,1494E-07 | 7,4537E-06 | [5, 6]          | Group74 | 4,42 | 181,00 |
| GO:0031399 | regulation of protein modification process                         | GO_BiologicalProcess-EBI-UniProt-GOA-ACAP-ARAP_08.05.2020_00h00 | 0,00182009 | 0,019547418 | 3,1494E-07 | 7,4537E-06 | [5, 6, 7]       | Group74 | 5,01 | 99,00  |
| GO:2000113 | negative regulation of cellular macromolecule biosynthetic process | GO_BiologicalProcess-EBI-UniProt-GOA-ACAP-ARAP_08.05.2020_00h00 | 0,00564347 | 0,035000116 | 3,1494E-07 | 7,4537E-06 | [5, 6, 7]       | Group74 | 5,00 | 78,00  |
| GO:0006468 | protein phosphorylation                                            | GO_BiologicalProcess-EBI-UniProt-GOA-ACAP-ARAP_08.05.2020_00h00 | 0,0061519  | 0,036606602 | 3,1494E-07 | 7,4537E-06 | [6, 7]          | Group74 | 4,79 | 101,00 |
| GO:0031401 | positive regulation of protein modification process                | GO_BiologicalProcess-EBI-UniProt-GOA-ACAP-ARAP_08.05.2020_00h00 | 0,00881382 | 0,043606952 | 3,1494E-07 | 7,4537E-06 | [5, 6, 7, 8]    | Group74 | 5,03 | 67,00  |
| GO:0044249 | cellular biosynthetic process                                      | GO_BiologicalProcess-EBI-UniProt-GOA-ACAP-ARAP_08.05.2020_00h00 | 9,566E-05  | 0,004680266 | 8,6913E-07 | 1,5427E-05 | [3]             | Group61 | 4,51 | 284,00 |
| GO:1901576 | organic substance biosynthetic process                             | GO_BiologicalProcess-EBI-UniProt-GOA-ACAP-ARAP_08.05.2020_00h00 | 6,6861E-06 | 0,000883237 | 8,6913E-07 | 1,5427E-05 | [3]             | Group61 | 4,62 | 296,00 |
| GO:0043603 | cellular amide metabolic process                                   | GO_BiologicalProcess-EBI-UniProt-GOA-ACAP-ARAP_08.05.2020_00h00 | 1,4828E-05 | 0,001632299 | 8,6913E-07 | 1,5427E-05 | [4]             | Group61 | 6,22 | 73,00  |
| GO:1901566 | organonitrogen compound biosynthetic process                       | GO_BiologicalProcess-EBI-UniProt-GOA-ACAP-ARAP_08.05.2020_00h00 | 1,2533E-06 | 0,000331134 | 8,6913E-07 | 1,5427E-05 | [4]             | Group61 | 5,85 | 112,00 |
| GO:0006518 | peptide metabolic process                                          | GO_BiologicalProcess-EBI-UniProt-GOA-ACAP-ARAP_08.05.2020_00h00 | 0,00024483 | 0,007350477 | 8,6913E-07 | 1,5427E-05 | [4, 5]          | Group61 | 6,17 | 54,00  |
| GO:0034248 | regulation of cellular amide metabolic process                     | GO_BiologicalProcess-EBI-UniProt-GOA-ACAP-ARAP_08.05.2020_00h00 | 0,00235406 | 0,022212256 | 8,6913E-07 | 1,5427E-05 | [4, 5]          | Group61 | 6,43 | 32,00  |

|            |                                                                           |                                                                 |            |             |            |            |                           |         |       |        |
|------------|---------------------------------------------------------------------------|-----------------------------------------------------------------|------------|-------------|------------|------------|---------------------------|---------|-------|--------|
| GO:0043604 | amide biosynthetic process                                                | GO_BiologicalProcess-EBI-UniProt-GOA-ACAP-ARAP_08.05.2020_00h00 | 0,0012976  | 0,016971523 | 8,6913E-07 | 1,5427E-05 | [5]                       | Group61 | 5,83  | 51,00  |
| GO:0043043 | peptide biosynthetic process                                              | GO_BiologicalProcess-EBI-UniProt-GOA-ACAP-ARAP_08.05.2020_00h00 | 0,00095896 | 0,014730037 | 8,6913E-07 | 1,5427E-05 | [5, 6]                    | Group61 | 6,15  | 44,00  |
| GO:0006412 | translation                                                               | GO_BiologicalProcess-EBI-UniProt-GOA-ACAP-ARAP_08.05.2020_00h00 | 0,00240929 | 0,022572109 | 8,6913E-07 | 1,5427E-05 | [5, 6, 7]                 | Group61 | 5,98  | 41,00  |
| GO:0060213 | positive regulation of nuclear-transcribed mRNA poly(A) tail shortening   | GO_BiologicalProcess-EBI-UniProt-GOA-ACAP-ARAP_08.05.2020_00h00 | 0,00902835 | 0,044009034 | 1,5636E-06 | 2,2203E-05 | [7, 8, 9, 10, 11, 12, 13] | Group69 | 25,00 | 3,00   |
| GO:0022603 | regulation of anatomical structure morphogenesis                          | GO_BiologicalProcess-EBI-UniProt-GOA-ACAP-ARAP_08.05.2020_00h00 | 0,00042874 | 0,009439493 | 1,5636E-06 | 2,2203E-05 | [3, 4]                    | Group69 | 5,70  | 67,00  |
| GO:0003725 | double-stranded RNA binding                                               | GO_MolecularFunction-EBI-UniProt-GOA-ACAP-ARAP_08.05.2020_00h00 | 0,00059753 | 0,011117499 | 1,5636E-06 | 2,2203E-05 | [5]                       | Group69 | 12,99 | 10,00  |
| GO:0001738 | morphogenesis of a polarized epithelium                                   | GO_BiologicalProcess-EBI-UniProt-GOA-ACAP-ARAP_08.05.2020_00h00 | 0,00641635 | 0,037339181 | 1,5636E-06 | 2,2203E-05 | [5, 6]                    | Group69 | 8,28  | 13,00  |
| GO:0010608 | posttranscriptional regulation of gene expression                         | GO_BiologicalProcess-EBI-UniProt-GOA-ACAP-ARAP_08.05.2020_00h00 | 0,00098194 | 0,014740233 | 1,5636E-06 | 2,2203E-05 | [5, 6]                    | Group69 | 6,19  | 43,00  |
| GO:2000027 | regulation of animal organ morphogenesis                                  | GO_BiologicalProcess-EBI-UniProt-GOA-ACAP-ARAP_08.05.2020_00h00 | 0,01016538 | 0,046626646 | 1,5636E-06 | 2,2203E-05 | [4, 5, 6, 7]              | Group69 | 6,76  | 19,00  |
| GO:0016441 | posttranscriptional gene silencing                                        | GO_BiologicalProcess-EBI-UniProt-GOA-ACAP-ARAP_08.05.2020_00h00 | 0,00958268 | 0,045209702 | 1,5636E-06 | 2,2203E-05 | [6, 7]                    | Group69 | 7,88  | 13,00  |
| GO:0035567 | non-canonical Wnt signaling pathway                                       | GO_BiologicalProcess-EBI-UniProt-GOA-ACAP-ARAP_08.05.2020_00h00 | 0,00230622 | 0,021917373 | 1,5636E-06 | 2,2203E-05 | [5, 6, 7, 8]              | Group69 | 8,97  | 14,00  |
| GO:0017148 | negative regulation of translation                                        | GO_BiologicalProcess-EBI-UniProt-GOA-ACAP-ARAP_08.05.2020_00h00 | 0,00273635 | 0,024423774 | 1,5636E-06 | 2,2203E-05 | [5, 6, 7, 8, 9]           | Group69 | 9,15  | 13,00  |
| GO:0007223 | Wnt signaling pathway, calcium modulating pathway                         | GO_BiologicalProcess-EBI-UniProt-GOA-ACAP-ARAP_08.05.2020_00h00 | 0,00457277 | 0,032302819 | 1,5636E-06 | 2,2203E-05 | [6, 7, 8, 9]              | Group69 | 14,29 | 6,00   |
| GO:0010586 | miRNA metabolic process                                                   | GO_BiologicalProcess-EBI-UniProt-GOA-ACAP-ARAP_08.05.2020_00h00 | 0,00483356 | 0,033430025 | 1,5636E-06 | 2,2203E-05 | [7, 8]                    | Group69 | 16,67 | 5,00   |
| GO:0035280 | miRNA loading onto RISC involved in gene silencing by miRNA               | GO_BiologicalProcess-EBI-UniProt-GOA-ACAP-ARAP_08.05.2020_00h00 | 0,00165342 | 0,018829085 | 1,5636E-06 | 2,2203E-05 | [5, 6, 7, 8, 9, 10, 11]   | Group69 | 42,86 | 3,00   |
| GO:0000288 | nuclear-transcribed mRNA catabolic process, deadenylation-dependent decay | GO_BiologicalProcess-EBI-UniProt-GOA-ACAP-ARAP_08.05.2020_00h00 | 0,00059753 | 0,011117499 | 1,5636E-06 | 2,2203E-05 | [7, 8, 9, 10]             | Group69 | 12,99 | 10,00  |
| GO:0000289 | nuclear-transcribed mRNA poly(A) tail shortening                          | GO_BiologicalProcess-EBI-UniProt-GOA-ACAP-ARAP_08.05.2020_00h00 | 0,01063148 | 0,047769345 | 1,5636E-06 | 2,2203E-05 | [7, 8, 9, 10, 11]         | Group69 | 13,89 | 5,00   |
| GO:0006810 | transport                                                                 | GO_BiologicalProcess-EBI-UniProt-GOA-ACAP-ARAP_08.05.2020_00h00 | 3,0106E-05 | 0,002485606 | 1,1929E-05 | 0,00010587 | [3]                       | Group70 | 4,64  | 258,00 |
| GO:0008104 | protein localization                                                      | GO_BiologicalProcess-EBI-UniProt-GOA-ACAP-ARAP_08.05.2020_00h00 | 0,00059278 | 0,011186681 | 1,1929E-05 | 0,00010587 | [3]                       | Group70 | 4,83  | 148,00 |
| GO:0016192 | vesicle-mediated transport                                                | GO_BiologicalProcess-EBI-UniProt-GOA-ACAP-ARAP_08.05.2020_00h00 | 0,00041163 | 0,009375341 | 1,1929E-05 | 0,00010587 | [2, 4]                    | Group70 | 5,08  | 116,00 |
| GO:0051649 | establishment of localization in cell                                     | GO_BiologicalProcess-EBI-UniProt-GOA-ACAP-ARAP_08.05.2020_00h00 | 0,0002794  | 0,008023772 | 1,1929E-05 | 0,00010587 | [3]                       | Group70 | 4,92  | 146,00 |
| GO:0045184 | establishment of protein localization                                     | GO_BiologicalProcess-EBI-UniProt-GOA-ACAP-ARAP_08.05.2020_00h00 | 0,00102526 | 0,014883237 | 1,1929E-05 | 0,00010587 | [3, 4]                    | Group70 | 4,96  | 116,00 |

|            |                                                    |                                                                 |            |             |            |            |                 |         |      |        |
|------------|----------------------------------------------------|-----------------------------------------------------------------|------------|-------------|------------|------------|-----------------|---------|------|--------|
| GO:0046907 | intracellular transport                            | GO_BiologicalProcess-EBI-UniProt-GOA-ACAP-ARAP_08.05.2020_00h00 | 0,00044702 | 0,009680472 | 1,1929E-05 | 0,00010587 | [3, 4]          | Group70 | 5,21 | 100,00 |
| GO:0060341 | regulation of cellular localization                | GO_BiologicalProcess-EBI-UniProt-GOA-ACAP-ARAP_08.05.2020_00h00 | 0,00680137 | 0,038070355 | 1,1929E-05 | 0,00010587 | [3, 4]          | Group70 | 5,25 | 57,00  |
| GO:0034613 | cellular protein localization                      | GO_BiologicalProcess-EBI-UniProt-GOA-ACAP-ARAP_08.05.2020_00h00 | 0,00303171 | 0,025837982 | 1,1929E-05 | 0,00010587 | [4]             | Group70 | 4,89 | 103,00 |
| GO:0071702 | organic substance transport                        | GO_BiologicalProcess-EBI-UniProt-GOA-ACAP-ARAP_08.05.2020_00h00 | 7,3678E-05 | 0,00389315  | 1,1929E-05 | 0,00010587 | [4]             | Group70 | 5,01 | 154,00 |
| GO:0071705 | nitrogen compound transport                        | GO_BiologicalProcess-EBI-UniProt-GOA-ACAP-ARAP_08.05.2020_00h00 | 0,00040292 | 0,009856539 | 1,1929E-05 | 0,00010587 | [4]             | Group70 | 4,96 | 132,00 |
| GO:1903827 | regulation of cellular protein localization        | GO_BiologicalProcess-EBI-UniProt-GOA-ACAP-ARAP_08.05.2020_00h00 | 0,00649101 | 0,037443761 | 1,1929E-05 | 0,00010587 | [4, 5]          | Group70 | 5,86 | 35,00  |
| GO:0042886 | amide transport                                    | GO_BiologicalProcess-EBI-UniProt-GOA-ACAP-ARAP_08.05.2020_00h00 | 0,00150298 | 0,01821504  | 1,1929E-05 | 0,00010587 | [5]             | Group70 | 4,92 | 114,00 |
| GO:0072657 | protein localization to membrane                   | GO_BiologicalProcess-EBI-UniProt-GOA-ACAP-ARAP_08.05.2020_00h00 | 0,00434593 | 0,031543817 | 1,1929E-05 | 0,00010587 | [5]             | Group70 | 5,81 | 40,00  |
| GO:0015031 | protein transport                                  | GO_BiologicalProcess-EBI-UniProt-GOA-ACAP-ARAP_08.05.2020_00h00 | 0,00092304 | 0,014515868 | 1,1929E-05 | 0,00010587 | [4, 5, 6, 7]    | Group70 | 5,00 | 112,00 |
| GO:0006886 | intracellular protein transport                    | GO_BiologicalProcess-EBI-UniProt-GOA-ACAP-ARAP_08.05.2020_00h00 | 0,00553953 | 0,03484628  | 1,1929E-05 | 0,00010587 | [4, 5, 6, 7, 8] | Group70 | 5,16 | 66,00  |
| GO:0080135 | regulation of cellular response to stress          | GO_BiologicalProcess-EBI-UniProt-GOA-ACAP-ARAP_08.05.2020_00h00 | 3,2327E-05 | 0,002372467 | 1,1611E-05 | 0,00011777 | [3, 4, 5]       | Group46 | 6,72 | 53,00  |
| GO:0031098 | stress-activated protein kinase signaling cascade  | GO_BiologicalProcess-EBI-UniProt-GOA-ACAP-ARAP_08.05.2020_00h00 | 0,00570056 | 0,035188999 | 1,1611E-05 | 0,00011777 | [4, 5, 6]       | Group46 | 6,79 | 22,00  |
| GO:0023014 | signal transduction by protein phosphorylation     | GO_BiologicalProcess-EBI-UniProt-GOA-ACAP-ARAP_08.05.2020_00h00 | 0,00262072 | 0,023875622 | 1,1611E-05 | 0,00011777 | [3, 4, 5, 7, 8] | Group46 | 5,54 | 55,00  |
| GO:0007275 | multicellular organism development                 | GO_BiologicalProcess-EBI-UniProt-GOA-ACAP-ARAP_08.05.2020_00h00 | 0,00186308 | 0,019847836 | 1,5386E-05 | 0,00012138 | [2, 3]          | Group71 | 4,38 | 253,00 |
| GO:0009653 | anatomical structure morphogenesis                 | GO_BiologicalProcess-EBI-UniProt-GOA-ACAP-ARAP_08.05.2020_00h00 | 0,00022289 | 0,007010267 | 1,5386E-05 | 0,00012138 | [2, 3]          | Group71 | 4,96 | 143,00 |
| GO:0050793 | regulation of developmental process                | GO_BiologicalProcess-EBI-UniProt-GOA-ACAP-ARAP_08.05.2020_00h00 | 0,00020963 | 0,006923161 | 1,5386E-05 | 0,00012138 | [2, 3]          | Group71 | 4,99 | 140,00 |
| GO:0051239 | regulation of multicellular organismal process     | GO_BiologicalProcess-EBI-UniProt-GOA-ACAP-ARAP_08.05.2020_00h00 | 0,00397082 | 0,029974045 | 1,5386E-05 | 0,00012138 | [2, 3]          | Group71 | 4,57 | 156,00 |
| GO:0000902 | cell morphogenesis                                 | GO_BiologicalProcess-EBI-UniProt-GOA-ACAP-ARAP_08.05.2020_00h00 | 0,01023283 | 0,046773579 | 1,5386E-05 | 0,00012138 | [3, 4]          | Group71 | 5,12 | 58,00  |
| GO:0022603 | regulation of anatomical structure morphogenesis   | GO_BiologicalProcess-EBI-UniProt-GOA-ACAP-ARAP_08.05.2020_00h00 | 0,00042874 | 0,009439493 | 1,5386E-05 | 0,00012138 | [3, 4]          | Group71 | 5,70 | 67,00  |
| GO:0035295 | tube development                                   | GO_BiologicalProcess-EBI-UniProt-GOA-ACAP-ARAP_08.05.2020_00h00 | 0,00116638 | 0,016391337 | 1,5386E-05 | 0,00012138 | [3, 4]          | Group71 | 5,57 | 63,00  |
| GO:0048731 | system development                                 | GO_BiologicalProcess-EBI-UniProt-GOA-ACAP-ARAP_08.05.2020_00h00 | 0,00093547 | 0,014538361 | 1,5386E-05 | 0,00012138 | [3, 4]          | Group71 | 4,48 | 232,00 |
| GO:2000026 | regulation of multicellular organismal development | GO_BiologicalProcess-EBI-UniProt-GOA-ACAP-ARAP_08.05.2020_00h00 | 0,00279194 | 0,024752729 | 1,5386E-05 | 0,00012138 | [3, 4]          | Group71 | 4,87 | 108,00 |
| GO:0035239 | tube morphogenesis                                 | GO_BiologicalProcess-EBI-UniProt-GOA-ACAP-ARAP_08.05.2020_00h00 | 0,00109299 | 0,015693877 | 1,5386E-05 | 0,00012138 | [3, 4, 5]       | Group71 | 5,82 | 53,00  |



|            |                                                        |                                                                 |            |             |            |            |                           |         |      |        |
|------------|--------------------------------------------------------|-----------------------------------------------------------------|------------|-------------|------------|------------|---------------------------|---------|------|--------|
| GO:0048513 | animal organ development                               | GO_BiologicalProcess-EBI-UniProt-GOA-ACAP-ARAP_08.05.2020_00h00 | 0,00518778 | 0,033926021 | 1,5386E-05 | 0,00012138 | [3, 4, 5]                 | Group71 | 4,49 | 173,00 |
| GO:2000145 | regulation of cell motility                            | GO_BiologicalProcess-EBI-UniProt-GOA-ACAP-ARAP_08.05.2020_00h00 | 0,0097313  | 0,045585286 | 1,5386E-05 | 0,00012138 | [3, 4, 5]                 | Group71 | 5,24 | 52,00  |
| GO:0072359 | circulatory system development                         | GO_BiologicalProcess-EBI-UniProt-GOA-ACAP-ARAP_08.05.2020_00h00 | 0,00358849 | 0,027884666 | 1,5386E-05 | 0,00012138 | [4, 5]                    | Group71 | 5,32 | 62,00  |
| GO:0072358 | cardiovascular system development                      | GO_BiologicalProcess-EBI-UniProt-GOA-ACAP-ARAP_08.05.2020_00h00 | 0,00514764 | 0,03417103  | 1,5386E-05 | 0,00012138 | [4, 5, 6]                 | Group71 | 5,63 | 44,00  |
| GO:2000027 | regulation of animal organ morphogenesis               | GO_BiologicalProcess-EBI-UniProt-GOA-ACAP-ARAP_08.05.2020_00h00 | 0,01016538 | 0,046626646 | 1,5386E-05 | 0,00012138 | [4, 5, 6, 7]              | Group71 | 6,76 | 19,00  |
| GO:0001568 | blood vessel development                               | GO_BiologicalProcess-EBI-UniProt-GOA-ACAP-ARAP_08.05.2020_00h00 | 0,00870441 | 0,04322752  | 1,5386E-05 | 0,00012138 | [3, 5, 6, 7, 8]           | Group71 | 5,54 | 41,00  |
| GO:0001525 | angiogenesis                                           | GO_BiologicalProcess-EBI-UniProt-GOA-ACAP-ARAP_08.05.2020_00h00 | 0,009983   | 0,046435013 | 1,5386E-05 | 0,00012138 | [3, 4, 5, 6, 7, 8, 9, 10] | Group71 | 5,82 | 32,00  |
| GO:0048514 | blood vessel morphogenesis                             | GO_BiologicalProcess-EBI-UniProt-GOA-ACAP-ARAP_08.05.2020_00h00 | 0,00502904 | 0,033552319 | 1,5386E-05 | 0,00012138 | [4, 5, 6, 7, 8, 9]        | Group71 | 5,84 | 38,00  |
| GO:0043168 | anion binding                                          | GO_MolecularFunction-EBI-UniProt-GOA-ACAP-ARAP_08.05.2020_00h00 | 0,00117658 | 0,016023351 | 1,0632E-05 | 0,00012581 | [3]                       | Group63 | 4,77 | 144,00 |
| GO:0044093 | positive regulation of molecular function              | GO_BiologicalProcess-EBI-UniProt-GOA-ACAP-ARAP_08.05.2020_00h00 | 6,4609E-05 | 0,004064203 | 1,0632E-05 | 0,00012581 | [3]                       | Group63 | 5,42 | 106,00 |
| GO:0050790 | regulation of catalytic activity                       | GO_BiologicalProcess-EBI-UniProt-GOA-ACAP-ARAP_08.05.2020_00h00 | 0,00041041 | 0,009511445 | 1,0632E-05 | 0,00012581 | [3]                       | Group63 | 5,00 | 127,00 |
| GO:0035639 | purine ribonucleoside triphosphate binding             | GO_MolecularFunction-EBI-UniProt-GOA-ACAP-ARAP_08.05.2020_00h00 | 0,00734326 | 0,03943269  | 1,0632E-05 | 0,00012581 | [4]                       | Group63 | 4,82 | 93,00  |
| GO:0043085 | positive regulation of catalytic activity              | GO_BiologicalProcess-EBI-UniProt-GOA-ACAP-ARAP_08.05.2020_00h00 | 0,00046043 | 0,009810138 | 1,0632E-05 | 0,00012581 | [4]                       | Group63 | 5,39 | 85,00  |
| GO:0051336 | regulation of hydrolase activity                       | GO_BiologicalProcess-EBI-UniProt-GOA-ACAP-ARAP_08.05.2020_00h00 | 0,00553121 | 0,034960426 | 1,0632E-05 | 0,00012581 | [4]                       | Group63 | 5,10 | 70,00  |
| GO:0016462 | pyrophosphatase activity                               | GO_MolecularFunction-EBI-UniProt-GOA-ACAP-ARAP_08.05.2020_00h00 | 0,00054986 | 0,010841349 | 1,0632E-05 | 0,00012581 | [5]                       | Group63 | 5,44 | 79,00  |
| GO:0017111 | nucleoside-triphosphatase activity                     | GO_MolecularFunction-EBI-UniProt-GOA-ACAP-ARAP_08.05.2020_00h00 | 0,00074854 | 0,012677147 | 1,0632E-05 | 0,00012581 | [6]                       | Group63 | 5,43 | 76,00  |
| GO:0016887 | ATPase activity                                        | GO_MolecularFunction-EBI-UniProt-GOA-ACAP-ARAP_08.05.2020_00h00 | 0,00383025 | 0,029247137 | 1,0632E-05 | 0,00012581 | [7]                       | Group63 | 6,17 | 33,00  |
| GO:0004386 | helicase activity                                      | GO_MolecularFunction-EBI-UniProt-GOA-ACAP-ARAP_08.05.2020_00h00 | 0,00353666 | 0,027644545 | 1,0632E-05 | 0,00012581 | [8]                       | Group63 | 8,29 | 15,00  |
| GO:0032879 | regulation of localization                             | GO_BiologicalProcess-EBI-UniProt-GOA-ACAP-ARAP_08.05.2020_00h00 | 0,00053678 | 0,010909115 | 1,7789E-05 | 0,0001263  | [2, 3]                    | Group64 | 4,85 | 145,00 |
| GO:0016043 | cellular component organization                        | GO_BiologicalProcess-EBI-UniProt-GOA-ACAP-ARAP_08.05.2020_00h00 | 2,4018E-05 | 0,002115194 | 1,7789E-05 | 0,0001263  | [3]                       | Group64 | 4,54 | 302,00 |
| GO:0044085 | cellular component biogenesis                          | GO_BiologicalProcess-EBI-UniProt-GOA-ACAP-ARAP_08.05.2020_00h00 | 0,00492259 | 0,033519275 | 1,7789E-05 | 0,0001263  | [3]                       | Group64 | 4,56 | 153,00 |
| GO:0051128 | regulation of cellular component organization          | GO_BiologicalProcess-EBI-UniProt-GOA-ACAP-ARAP_08.05.2020_00h00 | 6,5914E-05 | 0,003957818 | 1,7789E-05 | 0,0001263  | [3, 4]                    | Group64 | 5,17 | 132,00 |
| GO:0006996 | organelle organization                                 | GO_BiologicalProcess-EBI-UniProt-GOA-ACAP-ARAP_08.05.2020_00h00 | 0,00215967 | 0,021290433 | 1,7789E-05 | 0,0001263  | [4]                       | Group64 | 4,53 | 189,00 |
| GO:0051130 | positive regulation of cellular component organization | GO_BiologicalProcess-EBI-UniProt-GOA-ACAP-ARAP_08.05.2020_00h00 | 0,00526356 | 0,034084134 | 1,7789E-05 | 0,0001263  | [3, 4, 5]                 | Group64 | 5,15 | 67,00  |

|            |                                                                             |                                                                 |            |             |            |            |                            |         |       |       |
|------------|-----------------------------------------------------------------------------|-----------------------------------------------------------------|------------|-------------|------------|------------|----------------------------|---------|-------|-------|
| GO:0097435 | supramolecular fiber organization                                           | GO_BiologicalProcess-EBI-UniProt-GOA-ACAP-ARAP_08.05.2020_00h00 | 0,00397494 | 0,029834643 | 1,7789E-05 | 0,0001263  | [4]                        | Group64 | 5,74  | 43,00 |
| GO:0033043 | regulation of organelle organization                                        | GO_BiologicalProcess-EBI-UniProt-GOA-ACAP-ARAP_08.05.2020_00h00 | 0,00330584 | 0,026956866 | 1,7789E-05 | 0,0001263  | [4, 5]                     | Group64 | 5,19  | 72,00 |
| GO:0007010 | cytoskeleton organization                                                   | GO_BiologicalProcess-EBI-UniProt-GOA-ACAP-ARAP_08.05.2020_00h00 | 0,00829588 | 0,042149432 | 1,7789E-05 | 0,0001263  | [5]                        | Group64 | 4,98  | 73,00 |
| GO:0051017 | actin filament bundle assembly                                              | GO_BiologicalProcess-EBI-UniProt-GOA-ACAP-ARAP_08.05.2020_00h00 | 0,00958268 | 0,045209702 | 1,7789E-05 | 0,0001263  | [5, 6, 7, 9]               | Group64 | 7,88  | 13,00 |
| GO:0043548 | phosphatidylinositol 3-kinase binding                                       | GO_MolecularFunction-EBI-UniProt-GOA-ACAP-ARAP_08.05.2020_00h00 | 0,0015113  | 0,018149337 | 2,3242E-05 | 0,00015002 | [3]                        | Group52 | 17,65 | 6,00  |
| GO:0005520 | insulin-like growth factor binding                                          | GO_MolecularFunction-EBI-UniProt-GOA-ACAP-ARAP_08.05.2020_00h00 | 0,00642184 | 0,037207231 | 2,3242E-05 | 0,00015002 | [4]                        | Group52 | 15,63 | 5,00  |
| GO:0043559 | insulin binding                                                             | GO_MolecularFunction-EBI-UniProt-GOA-ACAP-ARAP_08.05.2020_00h00 | 0,00097195 | 0,01475805  | 2,3242E-05 | 0,00015002 | [3, 4, 5]                  | Group52 | 50,00 | 3,00  |
| GO:0043243 | positive regulation of protein-containing complex disassembly               | GO_BiologicalProcess-EBI-UniProt-GOA-ACAP-ARAP_08.05.2020_00h00 | 0,00312759 | 0,026149014 | 2,3242E-05 | 0,00015002 | [4, 5, 6, 7]               | Group52 | 15,38 | 6,00  |
| GO:0010828 | positive regulation of glucose transmembrane transport                      | GO_BiologicalProcess-EBI-UniProt-GOA-ACAP-ARAP_08.05.2020_00h00 | 0,00885185 | 0,043469477 | 2,3242E-05 | 0,00015002 | [4, 5, 6, 7, 8, 9, 10, 11] | Group52 | 12,50 | 6,00  |
| GO:0014068 | positive regulation of phosphatidylinositol 3-kinase signaling              | GO_BiologicalProcess-EBI-UniProt-GOA-ACAP-ARAP_08.05.2020_00h00 | 0,0013313  | 0,017241579 | 2,3242E-05 | 0,00015002 | [5, 6, 7, 8, 9, 10]        | Group52 | 11,00 | 11,00 |
| GO:0043903 | regulation of interspecies interactions between organisms                   | GO_BiologicalProcess-EBI-UniProt-GOA-ACAP-ARAP_08.05.2020_00h00 | 0,01024824 | 0,046682496 | 5,4863E-05 | 0,00029964 | [2, 3]                     | Group53 | 7,02  | 17,00 |
| GO:0051702 | interaction with symbiont                                                   | GO_BiologicalProcess-EBI-UniProt-GOA-ACAP-ARAP_08.05.2020_00h00 | 0,00616433 | 0,036516078 | 5,4863E-05 | 0,00029964 | [2, 3]                     | Group53 | 9,52  | 10,00 |
| GO:0016032 | viral process                                                               | GO_BiologicalProcess-EBI-UniProt-GOA-ACAP-ARAP_08.05.2020_00h00 | 0,00016263 | 0,006138108 | 5,4863E-05 | 0,00029964 | [3]                        | Group53 | 6,11  | 59,00 |
| GO:0051817 | modulation of process of other organism involved in symbiotic interaction   | GO_BiologicalProcess-EBI-UniProt-GOA-ACAP-ARAP_08.05.2020_00h00 | 0,00797737 | 0,041325882 | 5,4863E-05 | 0,00029964 | [3]                        | Group53 | 9,17  | 10,00 |
| GO:0019058 | viral life cycle                                                            | GO_BiologicalProcess-EBI-UniProt-GOA-ACAP-ARAP_08.05.2020_00h00 | 0,00316945 | 0,026332362 | 5,4863E-05 | 0,00029964 | [4]                        | Group53 | 6,92  | 24,00 |
| GO:1903902 | positive regulation of viral life cycle                                     | GO_BiologicalProcess-EBI-UniProt-GOA-ACAP-ARAP_08.05.2020_00h00 | 0,00387927 | 0,029451212 | 5,4863E-05 | 0,00029964 | [3, 4, 5, 6]               | Group53 | 11,76 | 8,00  |
| GO:0050839 | cell adhesion molecule binding                                              | GO_MolecularFunction-EBI-UniProt-GOA-ACAP-ARAP_08.05.2020_00h00 | 5,1606E-05 | 0,003408561 | 5,1606E-05 | 0,00030533 | [3]                        | Group37 | 7,30  | 40,00 |
| GO:0045296 | cadherin binding                                                            | GO_MolecularFunction-EBI-UniProt-GOA-ACAP-ARAP_08.05.2020_00h00 | 0,00038678 | 0,009640416 | 5,1606E-05 | 0,00030533 | [4]                        | Group37 | 7,67  | 27,00 |
| GO:0016765 | transferase activity, transferring alkyl or aryl (other than methyl) groups | GO_MolecularFunction-EBI-UniProt-GOA-ACAP-ARAP_08.05.2020_00h00 | 0,00999203 | 0,046313923 | 6,8927E-05 | 0,00034956 | [3]                        | Group47 | 10,94 | 7,00  |
| GO:0004659 | prenyltransferase activity                                                  | GO_MolecularFunction-EBI-UniProt-GOA-ACAP-ARAP_08.05.2020_00h00 | 0,00593399 | 0,035957828 | 6,8927E-05 | 0,00034956 | [4]                        | Group47 | 20,00 | 4,00  |
| GO:0045338 | farnesyl diphosphate metabolic process                                      | GO_BiologicalProcess-EBI-UniProt-GOA-ACAP-ARAP_08.05.2020_00h00 | 0,00049996 | 0,010319564 | 6,8927E-05 | 0,00034956 | [5, 6, 7]                  | Group47 | 60,00 | 3,00  |
| GO:0006695 | cholesterol biosynthetic process                                            | GO_BiologicalProcess-EBI-UniProt-GOA-ACAP-ARAP_08.05.2020_00h00 | 0,000154   | 0,005983353 | 6,8927E-05 | 0,00034956 | [6, 7]                     | Group47 | 14,10 | 11,00 |
| GO:0006790 | sulfur compound metabolic process                                           | GO_BiologicalProcess-EBI-UniProt-GOA-ACAP-ARAP_08.05.2020_00h00 | 0,0080568  | 0,041574333 | 0,00011946 | 0,00056543 | [3]                        | Group58 | 6,33  | 25,00 |

|            |                                               |                                                                 |            |             |            |            |                  |         |       |        |
|------------|-----------------------------------------------|-----------------------------------------------------------------|------------|-------------|------------|------------|------------------|---------|-------|--------|
| GO:0046148 | pigment biosynthetic process                  | GO_BiologicalProcess-EBI-UniProt-GOA-ACAP-ARAP_08.05.2020_00h00 | 0,00353662 | 0,027808812 | 0,00011946 | 0,00056543 | [3]              | Group58 | 11,94 | 8,00   |
| GO:0051186 | cofactor metabolic process                    | GO_BiologicalProcess-EBI-UniProt-GOA-ACAP-ARAP_08.05.2020_00h00 | 9,0345E-05 | 0,004590212 | 0,00011946 | 0,00056543 | [3]              | Group58 | 7,41  | 36,00  |
| GO:0006732 | coenzyme metabolic process                    | GO_BiologicalProcess-EBI-UniProt-GOA-ACAP-ARAP_08.05.2020_00h00 | 0,00677903 | 0,038269661 | 0,00011946 | 0,00056543 | [4]              | Group58 | 7,04  | 19,00  |
| GO:0051188 | cofactor biosynthetic process                 | GO_BiologicalProcess-EBI-UniProt-GOA-ACAP-ARAP_08.05.2020_00h00 | 0,00397827 | 0,029690914 | 0,00011946 | 0,00056543 | [4]              | Group58 | 7,56  | 18,00  |
| GO:0051597 | response to methylmercury                     | GO_BiologicalProcess-EBI-UniProt-GOA-ACAP-ARAP_08.05.2020_00h00 | 0,00375033 | 0,028971875 | 0,00011946 | 0,00056543 | [4]              | Group58 | 33,33 | 3,00   |
| GO:0010288 | response to lead ion                          | GO_BiologicalProcess-EBI-UniProt-GOA-ACAP-ARAP_08.05.2020_00h00 | 0,00300434 | 0,025939472 | 0,00011946 | 0,00056543 | [5]              | Group58 | 18,52 | 5,00   |
| GO:0006783 | heme biosynthetic process                     | GO_BiologicalProcess-EBI-UniProt-GOA-ACAP-ARAP_08.05.2020_00h00 | 0,00026534 | 0,007789075 | 0,00011946 | 0,00056543 | [4, 6, 7]        | Group58 | 24,00 | 6,00   |
| GO:0032879 | regulation of localization                    | GO_BiologicalProcess-EBI-UniProt-GOA-ACAP-ARAP_08.05.2020_00h00 | 0,00053678 | 0,010909115 | 0,00013732 | 0,0005735  | [2, 3]           | Group56 | 4,85  | 145,00 |
| GO:0040012 | regulation of locomotion                      | GO_BiologicalProcess-EBI-UniProt-GOA-ACAP-ARAP_08.05.2020_00h00 | 0,00599816 | 0,036180668 | 0,00013732 | 0,0005735  | [2, 3]           | Group56 | 5,32  | 55,00  |
| GO:0051128 | regulation of cellular component organization | GO_BiologicalProcess-EBI-UniProt-GOA-ACAP-ARAP_08.05.2020_00h00 | 6,5914E-05 | 0,003957818 | 0,00013732 | 0,0005735  | [3, 4]           | Group56 | 5,17  | 132,00 |
| GO:0060341 | regulation of cellular localization           | GO_BiologicalProcess-EBI-UniProt-GOA-ACAP-ARAP_08.05.2020_00h00 | 0,00680137 | 0,038070355 | 0,00013732 | 0,0005735  | [3, 4]           | Group56 | 5,25  | 57,00  |
| GO:0035239 | tube morphogenesis                            | GO_BiologicalProcess-EBI-UniProt-GOA-ACAP-ARAP_08.05.2020_00h00 | 0,00109299 | 0,015693877 | 0,00013732 | 0,0005735  | [3, 4, 5]        | Group56 | 5,82  | 53,00  |
| GO:2000145 | regulation of cell motility                   | GO_BiologicalProcess-EBI-UniProt-GOA-ACAP-ARAP_08.05.2020_00h00 | 0,0097313  | 0,045585286 | 0,00013732 | 0,0005735  | [3, 4, 5]        | Group56 | 5,24  | 52,00  |
| GO:0072359 | circulatory system development                | GO_BiologicalProcess-EBI-UniProt-GOA-ACAP-ARAP_08.05.2020_00h00 | 0,00358849 | 0,027884666 | 0,00013732 | 0,0005735  | [4, 5]           | Group56 | 5,32  | 62,00  |
| GO:0042802 | identical protein binding                     | GO_MolecularFunction-EBI-UniProt-GOA-ACAP-ARAP_08.05.2020_00h00 | 0,00013338 | 0,005872969 | 0,00013338 | 0,00059185 | [3]              | Group36 | 5,35  | 104,00 |
| GO:0042803 | protein homodimerization activity             | GO_MolecularFunction-EBI-UniProt-GOA-ACAP-ARAP_08.05.2020_00h00 | 0,00098608 | 0,014636023 | 0,00013338 | 0,00059185 | [4]              | Group36 | 6,15  | 44,00  |
| GO:0070291 | N-acyl ethanolamine metabolic process         | GO_BiologicalProcess-EBI-UniProt-GOA-ACAP-ARAP_08.05.2020_00h00 | 0,00020575 | 0,00715261  | 0,00020575 | 0,00081158 | [5, 6, 7, 8]     | Group24 | 75,00 | 3,00   |
| GO:0002262 | myeloid cell homeostasis                      | GO_BiologicalProcess-EBI-UniProt-GOA-ACAP-ARAP_08.05.2020_00h00 | 0,01053875 | 0,047677021 | 0,00022285 | 0,00083274 | [2, 5]           | Group51 | 7,78  | 13,00  |
| GO:0048872 | homeostasis of number of cells                | GO_BiologicalProcess-EBI-UniProt-GOA-ACAP-ARAP_08.05.2020_00h00 | 0,00142667 | 0,017948925 | 0,00022285 | 0,00083274 | [4]              | Group51 | 7,61  | 22,00  |
| GO:0030099 | myeloid cell differentiation                  | GO_BiologicalProcess-EBI-UniProt-GOA-ACAP-ARAP_08.05.2020_00h00 | 0,00282726 | 0,0248987   | 0,00022285 | 0,00083274 | [4, 5, 6, 7, 8]  | Group51 | 6,55  | 29,00  |
| GO:0030316 | osteoclast differentiation                    | GO_BiologicalProcess-EBI-UniProt-GOA-ACAP-ARAP_08.05.2020_00h00 | 0,00616433 | 0,036516078 | 0,00022285 | 0,00083274 | [6, 7, 8, 9, 10] | Group51 | 9,52  | 10,00  |
| GO:0000278 | mitotic cell cycle                            | GO_BiologicalProcess-EBI-UniProt-GOA-ACAP-ARAP_08.05.2020_00h00 | 0,00954564 | 0,045358974 | 0,00027925 | 0,00099132 | [3]              | Group67 | 5,16  | 57,00  |
| GO:1903047 | mitotic cell cycle process                    | GO_BiologicalProcess-EBI-UniProt-GOA-ACAP-ARAP_08.05.2020_00h00 | 0,00144421 | 0,017998116 | 0,00027925 | 0,00099132 | [3, 4]           | Group67 | 5,77  | 52,00  |
| GO:0006974 | cellular response to DNA damage stimulus      | GO_BiologicalProcess-EBI-UniProt-GOA-ACAP-ARAP_08.05.2020_00h00 | 0,00117532 | 0,016172897 | 0,00027925 | 0,00099132 | [4]              | Group67 | 5,80  | 53,00  |

|            |                                                                |                                                                 |            |             |            |            |                         |         |       |        |
|------------|----------------------------------------------------------------|-----------------------------------------------------------------|------------|-------------|------------|------------|-------------------------|---------|-------|--------|
| GO:0007050 | cell cycle arrest                                              | GO_BiologicalProcess-EBI-UniProt-GOA-ACAP-ARAP_08.05.2020_00h00 | 0,00658446 | 0,037654012 | 0,00027925 | 0,00099132 | [3, 4, 5, 6]            | Group67 | 7,20  | 18,00  |
| GO:0044772 | mitotic cell cycle phase transition                            | GO_BiologicalProcess-EBI-UniProt-GOA-ACAP-ARAP_08.05.2020_00h00 | 0,00557376 | 0,034895413 | 0,00027925 | 0,00099132 | [4, 5]                  | Group67 | 5,92  | 35,00  |
| GO:0090068 | positive regulation of cell cycle process                      | GO_BiologicalProcess-EBI-UniProt-GOA-ACAP-ARAP_08.05.2020_00h00 | 0,01055324 | 0,047579613 | 0,00027925 | 0,00099132 | [3, 4, 5, 6]            | Group67 | 6,62  | 20,00  |
| GO:0042770 | signal transduction in response to DNA damage                  | GO_BiologicalProcess-EBI-UniProt-GOA-ACAP-ARAP_08.05.2020_00h00 | 0,00328226 | 0,026930861 | 0,00027925 | 0,00099132 | [4, 5, 6]               | Group67 | 8,97  | 13,00  |
| GO:0072331 | signal transduction by p53 class mediator                      | GO_BiologicalProcess-EBI-UniProt-GOA-ACAP-ARAP_08.05.2020_00h00 | 0,00770793 | 0,040245749 | 0,00027925 | 0,00099132 | [4, 5, 6]               | Group67 | 6,83  | 20,00  |
| GO:1901990 | regulation of mitotic cell cycle phase transition              | GO_BiologicalProcess-EBI-UniProt-GOA-ACAP-ARAP_08.05.2020_00h00 | 0,00690286 | 0,038153462 | 0,00027925 | 0,00099132 | [5, 6, 7]               | Group67 | 6,26  | 27,00  |
| GO:2000045 | regulation of G1/S transition of mitotic cell cycle            | GO_BiologicalProcess-EBI-UniProt-GOA-ACAP-ARAP_08.05.2020_00h00 | 0,00711597 | 0,038843803 | 0,00027925 | 0,00099132 | [6, 7, 8]               | Group67 | 8,18  | 13,00  |
| GO:0031571 | mitotic G1 DNA damage checkpoint                               | GO_BiologicalProcess-EBI-UniProt-GOA-ACAP-ARAP_08.05.2020_00h00 | 0,01084532 | 0,048400886 | 0,00027925 | 0,00099132 | [5, 6, 7, 8, 9, 10, 11] | Group67 | 10,77 | 7,00   |
| GO:0032879 | regulation of localization                                     | GO_BiologicalProcess-EBI-UniProt-GOA-ACAP-ARAP_08.05.2020_00h00 | 0,00053678 | 0,010909115 | 0,00036152 | 0,00122229 | [2, 3]                  | Group66 | 4,85  | 145,00 |
| GO:0060341 | regulation of cellular localization                            | GO_BiologicalProcess-EBI-UniProt-GOA-ACAP-ARAP_08.05.2020_00h00 | 0,00680137 | 0,038070355 | 0,00036152 | 0,00122229 | [3, 4]                  | Group66 | 5,25  | 57,00  |
| GO:0034613 | cellular protein localization                                  | GO_BiologicalProcess-EBI-UniProt-GOA-ACAP-ARAP_08.05.2020_00h00 | 0,00303171 | 0,025837982 | 0,00036152 | 0,00122229 | [4]                     | Group66 | 4,89  | 103,00 |
| GO:0032386 | regulation of intracellular transport                          | GO_BiologicalProcess-EBI-UniProt-GOA-ACAP-ARAP_08.05.2020_00h00 | 0,0044923  | 0,032077484 | 0,00036152 | 0,00122229 | [4, 5]                  | Group66 | 6,47  | 27,00  |
| GO:1903827 | regulation of cellular protein localization                    | GO_BiologicalProcess-EBI-UniProt-GOA-ACAP-ARAP_08.05.2020_00h00 | 0,00649101 | 0,037443761 | 0,00036152 | 0,00122229 | [4, 5]                  | Group66 | 5,86  | 35,00  |
| GO:0072657 | protein localization to membrane                               | GO_BiologicalProcess-EBI-UniProt-GOA-ACAP-ARAP_08.05.2020_00h00 | 0,00434593 | 0,031543817 | 0,00036152 | 0,00122229 | [5]                     | Group66 | 5,81  | 40,00  |
| GO:1904375 | regulation of protein localization to cell periphery           | GO_BiologicalProcess-EBI-UniProt-GOA-ACAP-ARAP_08.05.2020_00h00 | 0,00302544 | 0,025951985 | 0,00036152 | 0,00122229 | [5, 6]                  | Group66 | 9,45  | 12,00  |
| GO:1905475 | regulation of protein localization to membrane                 | GO_BiologicalProcess-EBI-UniProt-GOA-ACAP-ARAP_08.05.2020_00h00 | 0,00090187 | 0,014528869 | 0,00036152 | 0,00122229 | [5, 6]                  | Group66 | 8,65  | 18,00  |
| GO:1905477 | positive regulation of protein localization to membrane        | GO_BiologicalProcess-EBI-UniProt-GOA-ACAP-ARAP_08.05.2020_00h00 | 0,00174604 | 0,018905882 | 0,00036152 | 0,00122229 | [4, 5, 6, 7]            | Group66 | 9,63  | 13,00  |
| GO:0072659 | protein localization to plasma membrane                        | GO_BiologicalProcess-EBI-UniProt-GOA-ACAP-ARAP_08.05.2020_00h00 | 0,00169805 | 0,018692721 | 0,00036152 | 0,00122229 | [6]                     | Group66 | 7,51  | 22,00  |
| GO:1903078 | positive regulation of protein localization to plasma membrane | GO_BiologicalProcess-EBI-UniProt-GOA-ACAP-ARAP_08.05.2020_00h00 | 0,00194354 | 0,01990249  | 0,00036152 | 0,00122229 | [5, 6, 7, 8]            | Group66 | 13,11 | 8,00   |
| GO:0048583 | regulation of response to stimulus                             | GO_BiologicalProcess-EBI-UniProt-GOA-ACAP-ARAP_08.05.2020_00h00 | 0,00220964 | 0,021462729 | 0,00040729 | 0,00131445 | [2, 3]                  | Group62 | 4,48  | 203,00 |
| GO:0033554 | cellular response to stress                                    | GO_BiologicalProcess-EBI-UniProt-GOA-ACAP-ARAP_08.05.2020_00h00 | 6,7283E-07 | 0,000222203 | 0,00040729 | 0,00131445 | [3]                     | Group62 | 5,74  | 126,00 |
| GO:0048585 | negative regulation of response to stimulus                    | GO_BiologicalProcess-EBI-UniProt-GOA-ACAP-ARAP_08.05.2020_00h00 | 0,00602008 | 0,035984259 | 0,00040729 | 0,00131445 | [2, 3, 4]               | Group62 | 4,91  | 86,00  |
| GO:0080134 | regulation of response to stress                               | GO_BiologicalProcess-EBI-UniProt-GOA-ACAP-ARAP_08.05.2020_00h00 | 3,1639E-05 | 0,002458551 | 0,00040729 | 0,00131445 | [3, 4]                  | Group62 | 5,76  | 89,00  |

|            |                                                                                 |                                                                 |            |             |            |            |                            |         |       |       |
|------------|---------------------------------------------------------------------------------|-----------------------------------------------------------------|------------|-------------|------------|------------|----------------------------|---------|-------|-------|
| GO:0006974 | cellular response to DNA damage stimulus                                        | GO_BiologicalProcess-EBI-UniProt-GOA-ACAP-ARAP_08.05.2020_00h00 | 0,00117532 | 0,016172897 | 0,00040729 | 0,00131445 | [4]                        | Group62 | 5,80  | 53,00 |
| GO:0080135 | regulation of cellular response to stress                                       | GO_BiologicalProcess-EBI-UniProt-GOA-ACAP-ARAP_08.05.2020_00h00 | 3,2327E-05 | 0,002372467 | 0,00040729 | 0,00131445 | [3, 4, 5]                  | Group62 | 6,72  | 53,00 |
| GO:0031098 | stress-activated protein kinase signaling cascade                               | GO_BiologicalProcess-EBI-UniProt-GOA-ACAP-ARAP_08.05.2020_00h00 | 0,00570056 | 0,035188999 | 0,00040729 | 0,00131445 | [4, 5, 6]                  | Group62 | 6,79  | 22,00 |
| GO:0072331 | signal transduction by p53 class mediator                                       | GO_BiologicalProcess-EBI-UniProt-GOA-ACAP-ARAP_08.05.2020_00h00 | 0,00770793 | 0,040245749 | 0,00040729 | 0,00131445 | [4, 5, 6]                  | Group62 | 6,83  | 20,00 |
| GO:2001020 | regulation of response to DNA damage stimulus                                   | GO_BiologicalProcess-EBI-UniProt-GOA-ACAP-ARAP_08.05.2020_00h00 | 0,00415625 | 0,030333709 | 0,00040729 | 0,00131445 | [4, 5, 6]                  | Group62 | 7,53  | 18,00 |
| GO:0006282 | regulation of DNA repair                                                        | GO_BiologicalProcess-EBI-UniProt-GOA-ACAP-ARAP_08.05.2020_00h00 | 0,00496658 | 0,033645403 | 0,00040729 | 0,00131445 | [5, 6, 7, 8]               | Group62 | 8,89  | 12,00 |
| GO:0019221 | cytokine-mediated signaling pathway                                             | GO_BiologicalProcess-EBI-UniProt-GOA-ACAP-ARAP_08.05.2020_00h00 | 0,00074874 | 0,012520107 | 0,00074874 | 0,00204464 | [4, 5, 6]                  | Group43 | 6,01  | 50,00 |
| GO:0001959 | regulation of cytokine-mediated signaling pathway                               | GO_BiologicalProcess-EBI-UniProt-GOA-ACAP-ARAP_08.05.2020_00h00 | 0,00229538 | 0,021972449 | 0,00074874 | 0,00204464 | [4, 5, 6, 7]               | Group43 | 8,67  | 15,00 |
| GO:0001961 | positive regulation of cytokine-mediated signaling pathway                      | GO_BiologicalProcess-EBI-UniProt-GOA-ACAP-ARAP_08.05.2020_00h00 | 0,00435788 | 0,031457711 | 0,00074874 | 0,00204464 | [4, 5, 6, 7, 8]            | Group43 | 12,73 | 7,00  |
| GO:0046661 | male sex differentiation                                                        | GO_BiologicalProcess-EBI-UniProt-GOA-ACAP-ARAP_08.05.2020_00h00 | 0,00074433 | 0,012769634 | 0,00074433 | 0,0021139  | [3, 4, 5]                  | Group12 | 9,36  | 16,00 |
| GO:0055102 | lipase inhibitor activity                                                       | GO_BiologicalProcess-EBI-UniProt-GOA-ACAP-ARAP_08.05.2020_00h00 | 0,00071719 | 0,012465877 | 0,00071719 | 0,00212168 | [6]                        | Group20 | 25,00 | 5,00  |
| GO:0090559 | regulation of membrane permeability                                             | GO_BiologicalProcess-EBI-UniProt-GOA-ACAP-ARAP_08.05.2020_00h00 | 0,00669038 | 0,037931312 | 0,00069836 | 0,00215581 | [3]                        | Group54 | 10,00 | 9,00  |
| GO:0006839 | mitochondrial transport                                                         | GO_BiologicalProcess-EBI-UniProt-GOA-ACAP-ARAP_08.05.2020_00h00 | 0,00472711 | 0,033039756 | 0,00069836 | 0,00215581 | [4]                        | Group54 | 7,14  | 20,00 |
| GO:0010917 | negative regulation of mitochondrial membrane potential                         | GO_BiologicalProcess-EBI-UniProt-GOA-ACAP-ARAP_08.05.2020_00h00 | 0,00077017 | 0,01256045  | 0,00069836 | 0,00215581 | [5]                        | Group54 | 33,33 | 4,00  |
| GO:0008637 | apoptotic mitochondrial changes                                                 | GO_BiologicalProcess-EBI-UniProt-GOA-ACAP-ARAP_08.05.2020_00h00 | 0,00440738 | 0,031642117 | 0,00069836 | 0,00215581 | [5, 6]                     | Group54 | 9,02  | 12,00 |
| GO:1902108 | regulation of mitochondrial membrane permeability involved in apoptotic process | GO_BiologicalProcess-EBI-UniProt-GOA-ACAP-ARAP_08.05.2020_00h00 | 0,00264759 | 0,023955263 | 0,00069836 | 0,00215581 | [5, 6, 7, 8]               | Group54 | 12,50 | 8,00  |
| GO:0097345 | mitochondrial outer membrane permeabilization                                   | GO_BiologicalProcess-EBI-UniProt-GOA-ACAP-ARAP_08.05.2020_00h00 | 0,00532364 | 0,034138508 | 0,00069836 | 0,00215581 | [4, 5, 6, 7, 8, 9, 10, 11] | Group54 | 12,28 | 7,00  |
| GO:0070087 | chromo shadow domain binding                                                    | GO_MolecularFunction-EBI-UniProt-GOA-ACAP-ARAP_08.05.2020_00h00 | 0,00097195 | 0,01475805  | 0,00097195 | 0,00255588 | [4]                        | Group23 | 50,00 | 3,00  |
| GO:1903371 | regulation of endoplasmic reticulum tubular network organization                | GO_BiologicalProcess-EBI-UniProt-GOA-ACAP-ARAP_08.05.2020_00h00 | 0,00097195 | 0,01475805  | 0,00097195 | 0,00255588 | [5, 6, 7]                  | Group29 | 50,00 | 3,00  |
| GO:0010256 | endomembrane system organization                                                | GO_BiologicalProcess-EBI-UniProt-GOA-ACAP-ARAP_08.05.2020_00h00 | 0,00111057 | 0,015774863 | 0,00111057 | 0,00281609 | [4]                        | Group41 | 6,74  | 32,00 |
| GO:0007030 | Golgi organization                                                              | GO_BiologicalProcess-EBI-UniProt-GOA-ACAP-ARAP_08.05.2020_00h00 | 0,00192354 | 0,020166637 | 0,00111057 | 0,00281609 | [5]                        | Group41 | 9,15  | 14,00 |
| GO:0033197 | response to vitamin E                                                           | GO_BiologicalProcess-EBI-UniProt-GOA-ACAP-ARAP_08.05.2020_00h00 | 0,00146665 | 0,017939325 | 0,00146665 | 0,00325413 | [4, 5, 7]                  | Group04 | 28,57 | 4,00  |
| GO:0051058 | negative regulation of small GTPase mediated signal transduction                | GO_BiologicalProcess-EBI-UniProt-GOA-ACAP-ARAP_08.05.2020_00h00 | 0,00918873 | 0,044300407 | 0,00146115 | 0,00334649 | [5, 6, 7, 8]               | Group38 | 11,11 | 7,00  |

|            |                                                                         |                                                                 |            |             |            |            |                            |         |       |        |
|------------|-------------------------------------------------------------------------|-----------------------------------------------------------------|------------|-------------|------------|------------|----------------------------|---------|-------|--------|
| GO:0046578 | regulation of Ras protein signal transduction                           | GO_BiologicalProcess-EBI-UniProt-GOA-ACAP-ARAP_08.05.2020_00h00 | 0,00624691 | 0,036676299 | 0,00146115 | 0,00334649 | [6, 7, 8]                  | Group38 | 7,58  | 16,00  |
| GO:0043559 | insulin binding                                                         | GO_MolecularFunction-EBI-UniProt-GOA-ACAP-ARAP_08.05.2020_00h00 | 0,00097195 | 0,01475805  | 0,00143933 | 0,00340641 | [3, 4, 5]                  | Group45 | 50,00 | 3,00   |
| GO:0008643 | carbohydrate transport                                                  | GO_BiologicalProcess-EBI-UniProt-GOA-ACAP-ARAP_08.05.2020_00h00 | 0,0030825  | 0,025936192 | 0,00143933 | 0,00340641 | [5]                        | Group45 | 8,70  | 14,00  |
| GO:0010828 | positive regulation of glucose transmembrane transport                  | GO_BiologicalProcess-EBI-UniProt-GOA-ACAP-ARAP_08.05.2020_00h00 | 0,00885185 | 0,043469477 | 0,00143933 | 0,00340641 | [4, 5, 6, 7, 8, 9, 10, 11] | Group45 | 12,50 | 6,00   |
| GO:0007569 | cell aging                                                              | GO_BiologicalProcess-EBI-UniProt-GOA-ACAP-ARAP_08.05.2020_00h00 | 0,00140467 | 0,017842019 | 0,00140467 | 0,00343902 | [3]                        | Group44 | 10,34 | 12,00  |
| GO:0090398 | cellular senescence                                                     | GO_BiologicalProcess-EBI-UniProt-GOA-ACAP-ARAP_08.05.2020_00h00 | 0,00119379 | 0,016091736 | 0,00140467 | 0,00343902 | [4]                        | Group44 | 12,86 | 9,00   |
| GO:2000772 | regulation of cellular senescence                                       | GO_BiologicalProcess-EBI-UniProt-GOA-ACAP-ARAP_08.05.2020_00h00 | 0,00020483 | 0,007313081 | 0,00140467 | 0,00343902 | [4, 5, 6]                  | Group44 | 18,18 | 8,00   |
| GO:0048545 | response to steroid hormone                                             | GO_BiologicalProcess-EBI-UniProt-GOA-ACAP-ARAP_08.05.2020_00h00 | 0,00164864 | 0,018937808 | 0,00164864 | 0,00344274 | [4, 5]                     | Group15 | 6,79  | 29,00  |
| GO:0043169 | cation binding                                                          | GO_MolecularFunction-EBI-UniProt-GOA-ACAP-ARAP_08.05.2020_00h00 | 0,00162443 | 0,018823465 | 0,00162443 | 0,00349499 | [3]                        | Group42 | 4,51  | 203,00 |
| GO:0046872 | metal ion binding                                                       | GO_MolecularFunction-EBI-UniProt-GOA-ACAP-ARAP_08.05.2020_00h00 | 0,00120791 | 0,016117612 | 0,00162443 | 0,00349499 | [4]                        | Group42 | 4,55  | 200,00 |
| GO:0046914 | transition metal ion binding                                            | GO_MolecularFunction-EBI-UniProt-GOA-ACAP-ARAP_08.05.2020_00h00 | 0,00058682 | 0,011234617 | 0,00162443 | 0,00349499 | [5]                        | Group42 | 5,68  | 65,00  |
| GO:0070482 | response to oxygen levels                                               | GO_BiologicalProcess-EBI-UniProt-GOA-ACAP-ARAP_08.05.2020_00h00 | 0,0021618  | 0,021153586 | 0,0021618  | 0,00414831 | [3]                        | Group49 | 6,75  | 28,00  |
| GO:0001666 | response to hypoxia                                                     | GO_BiologicalProcess-EBI-UniProt-GOA-ACAP-ARAP_08.05.2020_00h00 | 0,00817135 | 0,042001352 | 0,0021618  | 0,00414831 | [3, 5]                     | Group49 | 6,40  | 24,00  |
| GO:0036293 | response to decreased oxygen levels                                     | GO_BiologicalProcess-EBI-UniProt-GOA-ACAP-ARAP_08.05.2020_00h00 | 0,00334785 | 0,026966546 | 0,0021618  | 0,00414831 | [4]                        | Group49 | 6,70  | 26,00  |
| GO:0071453 | cellular response to oxygen levels                                      | GO_BiologicalProcess-EBI-UniProt-GOA-ACAP-ARAP_08.05.2020_00h00 | 0,00912035 | 0,044131801 | 0,0021618  | 0,00414831 | [4]                        | Group49 | 7,11  | 17,00  |
| GO:0010039 | response to iron ion                                                    | GO_BiologicalProcess-EBI-UniProt-GOA-ACAP-ARAP_08.05.2020_00h00 | 0,00205382 | 0,020553729 | 0,00205382 | 0,00416631 | [5]                        | Group33 | 16,67 | 6,00   |
| GO:0060213 | positive regulation of nuclear-transcribed mRNA poly(A) tail shortening | GO_BiologicalProcess-EBI-UniProt-GOA-ACAP-ARAP_08.05.2020_00h00 | 0,00902835 | 0,044009034 | 0,00214339 | 0,00422725 | [7, 8, 9, 10, 11, 12, 13]  | Group59 | 25,00 | 3,00   |
| GO:0034655 | nucleobase-containing compound catabolic process                        | GO_BiologicalProcess-EBI-UniProt-GOA-ACAP-ARAP_08.05.2020_00h00 | 0,00214339 | 0,021288881 | 0,00214339 | 0,00422725 | [4, 5]                     | Group59 | 6,24  | 36,00  |
| GO:0006402 | mRNA catabolic process                                                  | GO_BiologicalProcess-EBI-UniProt-GOA-ACAP-ARAP_08.05.2020_00h00 | 7,0249E-05 | 0,004034745 | 0,00214339 | 0,00422725 | [5, 6, 7, 8]               | Group59 | 7,99  | 31,00  |
| GO:0061013 | regulation of mRNA catabolic process                                    | GO_BiologicalProcess-EBI-UniProt-GOA-ACAP-ARAP_08.05.2020_00h00 | 0,0054584  | 0,034833573 | 0,00214339 | 0,00422725 | [5, 6, 7, 8, 9]            | Group59 | 7,69  | 16,00  |
| GO:0000956 | nuclear-transcribed mRNA catabolic process                              | GO_BiologicalProcess-EBI-UniProt-GOA-ACAP-ARAP_08.05.2020_00h00 | 0,00023791 | 0,007308858 | 0,00214339 | 0,00422725 | [6, 7, 8, 9]               | Group59 | 9,13  | 20,00  |
| GO:0110156 | methylguanosine-cap decapping                                           | GO_BiologicalProcess-EBI-UniProt-GOA-ACAP-ARAP_08.05.2020_00h00 | 0,00194092 | 0,020188617 | 0,00214339 | 0,00422725 | [7, 8]                     | Group59 | 26,67 | 4,00   |

|            |                                                                           |                                                                 |            |             |            |            |                   |         |       |       |
|------------|---------------------------------------------------------------------------|-----------------------------------------------------------------|------------|-------------|------------|------------|-------------------|---------|-------|-------|
| GO:0000288 | nuclear-transcribed mRNA catabolic process, deadenylation-dependent decay | GO_BiologicalProcess-EBI-UniProt-GOA-ACAP-ARAP_08.05.2020_00h00 | 0,00059753 | 0,011117499 | 0,00214339 | 0,00422725 | [7, 8, 9, 10]     | Group59 | 12,99 | 10,00 |
| GO:0000289 | nuclear-transcribed mRNA poly(A) tail shortening                          | GO_BiologicalProcess-EBI-UniProt-GOA-ACAP-ARAP_08.05.2020_00h00 | 0,01063148 | 0,047769345 | 0,00214339 | 0,00422725 | [7, 8, 9, 10, 11] | Group59 | 13,89 | 5,00  |
| GO:0043928 | exonucleolytic catabolism of deadenylated mRNA                            | GO_BiologicalProcess-EBI-UniProt-GOA-ACAP-ARAP_08.05.2020_00h00 | 0,00128489 | 0,016973414 | 0,00214339 | 0,00422725 | [8, 9, 10, 11]    | Group59 | 18,18 | 6,00  |
| GO:0050680 | negative regulation of epithelial cell proliferation                      | GO_BiologicalProcess-EBI-UniProt-GOA-ACAP-ARAP_08.05.2020_00h00 | 0,00226702 | 0,021859324 | 0,00226702 | 0,00423574 | [4, 5, 6]         | Group16 | 9,35  | 13,00 |
| GO:0034248 | regulation of cellular amide metabolic process                            | GO_BiologicalProcess-EBI-UniProt-GOA-ACAP-ARAP_08.05.2020_00h00 | 0,00235406 | 0,022212256 | 0,00251239 | 0,00445949 | [4, 5]            | Group60 | 6,43  | 32,00 |
| GO:0010608 | posttranscriptional regulation of gene expression                         | GO_BiologicalProcess-EBI-UniProt-GOA-ACAP-ARAP_08.05.2020_00h00 | 0,00098194 | 0,014740233 | 0,00251239 | 0,00445949 | [5, 6]            | Group60 | 6,19  | 43,00 |
| GO:0043043 | peptide biosynthetic process                                              | GO_BiologicalProcess-EBI-UniProt-GOA-ACAP-ARAP_08.05.2020_00h00 | 0,00095896 | 0,014730037 | 0,00251239 | 0,00445949 | [5, 6]            | Group60 | 6,15  | 44,00 |
| GO:0006412 | translation                                                               | GO_BiologicalProcess-EBI-UniProt-GOA-ACAP-ARAP_08.05.2020_00h00 | 0,00240929 | 0,022572109 | 0,00251239 | 0,00445949 | [5, 6, 7]         | Group60 | 5,98  | 41,00 |
| GO:0006402 | mRNA catabolic process                                                    | GO_BiologicalProcess-EBI-UniProt-GOA-ACAP-ARAP_08.05.2020_00h00 | 7,0249E-05 | 0,004034745 | 0,00251239 | 0,00445949 | [5, 6, 7, 8]      | Group60 | 7,99  | 31,00 |
| GO:0016441 | posttranscriptional gene silencing                                        | GO_BiologicalProcess-EBI-UniProt-GOA-ACAP-ARAP_08.05.2020_00h00 | 0,00958268 | 0,045209702 | 0,00251239 | 0,00445949 | [6, 7]            | Group60 | 7,88  | 13,00 |
| GO:0017148 | negative regulation of translation                                        | GO_BiologicalProcess-EBI-UniProt-GOA-ACAP-ARAP_08.05.2020_00h00 | 0,00273635 | 0,024423774 | 0,00251239 | 0,00445949 | [5, 6, 7, 8, 9]   | Group60 | 9,15  | 13,00 |
| GO:0061013 | regulation of mRNA catabolic process                                      | GO_BiologicalProcess-EBI-UniProt-GOA-ACAP-ARAP_08.05.2020_00h00 | 0,0054584  | 0,034833573 | 0,00251239 | 0,00445949 | [5, 6, 7, 8, 9]   | Group60 | 7,69  | 16,00 |
| GO:0000289 | nuclear-transcribed mRNA poly(A) tail shortening                          | GO_BiologicalProcess-EBI-UniProt-GOA-ACAP-ARAP_08.05.2020_00h00 | 0,01063148 | 0,047769345 | 0,00251239 | 0,00445949 | [7, 8, 9, 10, 11] | Group60 | 13,89 | 5,00  |
| GO:0061024 | membrane organization                                                     | GO_BiologicalProcess-EBI-UniProt-GOA-ACAP-ARAP_08.05.2020_00h00 | 0,0024574  | 0,022860711 | 0,0024574  | 0,00447372 | [4]               | Group22 | 5,56  | 55,00 |
| GO:0002474 | antigen processing and presentation of peptide antigen via MHC class I    | GO_BiologicalProcess-EBI-UniProt-GOA-ACAP-ARAP_08.05.2020_00h00 | 0,00502893 | 0,03372189  | 0,00263126 | 0,00455657 | [4]               | Group35 | 9,80  | 10,00 |
| GO:0002478 | antigen processing and presentation of exogenous peptide antigen          | GO_BiologicalProcess-EBI-UniProt-GOA-ACAP-ARAP_08.05.2020_00h00 | 0,00171105 | 0,018680111 | 0,00263126 | 0,00455657 | [4]               | Group35 | 8,65  | 16,00 |
| GO:0060323 | head morphogenesis                                                        | GO_BiologicalProcess-EBI-UniProt-GOA-ACAP-ARAP_08.05.2020_00h00 | 0,00273174 | 0,024548518 | 0,00273174 | 0,00461795 | [3, 4, 5]         | Group21 | 15,79 | 6,00  |
| GO:0006629 | lipid metabolic process                                                   | GO_BiologicalProcess-EBI-UniProt-GOA-ACAP-ARAP_08.05.2020_00h00 | 0,00937805 | 0,044885512 | 0,00287133 | 0,00474103 | [3]               | Group65 | 4,93  | 75,00 |
| GO:1901615 | organic hydroxy compound metabolic process                                | GO_BiologicalProcess-EBI-UniProt-GOA-ACAP-ARAP_08.05.2020_00h00 | 0,00013405 | 0,005712426 | 0,00287133 | 0,00474103 | [3]               | Group65 | 6,86  | 42,00 |
| GO:0006066 | alcohol metabolic process                                                 | GO_BiologicalProcess-EBI-UniProt-GOA-ACAP-ARAP_08.05.2020_00h00 | 1,998E-05  | 0,002030259 | 0,00287133 | 0,00474103 | [3, 4]            | Group65 | 8,17  | 34,00 |
| GO:0008202 | steroid metabolic process                                                 | GO_BiologicalProcess-EBI-UniProt-GOA-ACAP-ARAP_08.05.2020_00h00 | 0,00518595 | 0,034082759 | 0,00287133 | 0,00474103 | [4]               | Group65 | 6,65  | 24,00 |
| GO:1901617 | organic hydroxy compound biosynthetic process                             | GO_BiologicalProcess-EBI-UniProt-GOA-ACAP-ARAP_08.05.2020_00h00 | 0,00201228 | 0,020291785 | 0,00287133 | 0,00474103 | [4]               | Group65 | 7,41  | 22,00 |
| GO:0016125 | sterol metabolic process                                                  | GO_BiologicalProcess-EBI-UniProt-GOA-ACAP-ARAP_08.05.2020_00h00 | 0,00019292 | 0,007079005 | 0,00287133 | 0,00474103 | [4, 5]            | Group65 | 9,84  | 18,00 |

|            |                                                                                 |                                                                 |            |             |            |            |                   |         |       |       |
|------------|---------------------------------------------------------------------------------|-----------------------------------------------------------------|------------|-------------|------------|------------|-------------------|---------|-------|-------|
| GO:0046165 | alcohol biosynthetic process                                                    | GO_BiologicalProcess-EBI-UniProt-GOA-ACAP-ARAP_08.05.2020_00h00 | 0,00090762 | 0,014445367 | 0,00287133 | 0,00474103 | [4, 5]            | Group65 | 8,90  | 17,00 |
| GO:1902652 | secondary alcohol metabolic process                                             | GO_BiologicalProcess-EBI-UniProt-GOA-ACAP-ARAP_08.05.2020_00h00 | 0,00020651 | 0,006994962 | 0,00287133 | 0,00474103 | [4, 5]            | Group65 | 9,78  | 18,00 |
| GO:0045338 | farnesyl diphosphate metabolic process                                          | GO_BiologicalProcess-EBI-UniProt-GOA-ACAP-ARAP_08.05.2020_00h00 | 0,00049996 | 0,010319564 | 0,00287133 | 0,00474103 | [5, 6, 7]         | Group65 | 60,00 | 3,00  |
| GO:0006695 | cholesterol biosynthetic process                                                | GO_BiologicalProcess-EBI-UniProt-GOA-ACAP-ARAP_08.05.2020_00h00 | 0,000154   | 0,005983353 | 0,00287133 | 0,00474103 | [6, 7]            | Group65 | 14,10 | 11,00 |
| GO:0019842 | vitamin binding                                                                 | GO_MolecularFunction-EBI-UniProt-GOA-ACAP-ARAP_08.05.2020_00h00 | 0,01053875 | 0,047677021 | 0,00353469 | 0,0057037  | [3]               | Group50 | 7,78  | 13,00 |
| GO:0048029 | monosaccharide binding                                                          | GO_MolecularFunction-EBI-UniProt-GOA-ACAP-ARAP_08.05.2020_00h00 | 0,00578091 | 0,035518978 | 0,00353469 | 0,0057037  | [3]               | Group50 | 10,23 | 9,00  |
| GO:0050662 | coenzyme binding                                                                | GO_MolecularFunction-EBI-UniProt-GOA-ACAP-ARAP_08.05.2020_00h00 | 0,0067867  | 0,038149916 | 0,00353469 | 0,0057037  | [3]               | Group50 | 6,69  | 22,00 |
| GO:0031418 | L-ascorbic acid binding                                                         | GO_MolecularFunction-EBI-UniProt-GOA-ACAP-ARAP_08.05.2020_00h00 | 0,00844242 | 0,04256656  | 0,00353469 | 0,0057037  | [4, 5]            | Group50 | 18,18 | 4,00  |
| GO:0031122 | cytoplasmic microtubule organization                                            | GO_BiologicalProcess-EBI-UniProt-GOA-ACAP-ARAP_08.05.2020_00h00 | 0,00387927 | 0,029451212 | 0,00387927 | 0,00612062 | [4, 5, 7]         | Group02 | 11,76 | 8,00  |
| GO:0097001 | ceramide binding                                                                | GO_MolecularFunction-EBI-UniProt-GOA-ACAP-ARAP_08.05.2020_00h00 | 0,00489063 | 0,033474229 | 0,00527774 | 0,00797275 | [3, 4]            | Group48 | 21,05 | 4,00  |
| GO:0005319 | lipid transporter activity                                                      | GO_BiologicalProcess-EBI-UniProt-GOA-ACAP-ARAP_08.05.2020_00h00 | 0,00748774 | 0,039565202 | 0,00527774 | 0,00797275 | [5, 6]            | Group48 | 8,13  | 13,00 |
| GO:0035621 | ER to Golgi ceramide transport                                                  | GO_BiologicalProcess-EBI-UniProt-GOA-ACAP-ARAP_08.05.2020_00h00 | 0,00049996 | 0,010319564 | 0,00527774 | 0,00797275 | [5, 6, 7]         | Group48 | 60,00 | 3,00  |
| GO:0046624 | sphingolipid transporter activity                                               | GO_BiologicalProcess-EBI-UniProt-GOA-ACAP-ARAP_08.05.2020_00h00 | 0,00194092 | 0,020188617 | 0,00527774 | 0,00797275 | [6, 7]            | Group48 | 26,67 | 4,00  |
| GO:0034770 | histone H4-K20 methylation                                                      | GO_BiologicalProcess-EBI-UniProt-GOA-ACAP-ARAP_08.05.2020_00h00 | 0,00520889 | 0,033896301 | 0,00520889 | 0,00803982 | [7, 8, 9, 10, 11] | Group05 | 30,00 | 3,00  |
| GO:1905288 | vascular associated smooth muscle cell apoptotic process                        | GO_BiologicalProcess-EBI-UniProt-GOA-ACAP-ARAP_08.05.2020_00h00 | 0,00520889 | 0,033896301 | 0,00520889 | 0,00803982 | [7]               | Group40 | 30,00 | 3,00  |
| GO:1905461 | positive regulation of vascular associated smooth muscle cell apoptotic process | GO_BiologicalProcess-EBI-UniProt-GOA-ACAP-ARAP_08.05.2020_00h00 | 0,00257175 | 0,023592267 | 0,00520889 | 0,00803982 | [8, 9, 10]        | Group40 | 37,50 | 3,00  |
| GO:0044262 | cellular carbohydrate metabolic process                                         | GO_BiologicalProcess-EBI-UniProt-GOA-ACAP-ARAP_08.05.2020_00h00 | 0,00702309 | 0,038495868 | 0,00702309 | 0,00940829 | [3, 4]            | Group10 | 6,67  | 22,00 |
| GO:0045995 | regulation of embryonic development                                             | GO_BiologicalProcess-EBI-UniProt-GOA-ACAP-ARAP_08.05.2020_00h00 | 0,00699011 | 0,038474753 | 0,00699011 | 0,00954419 | [4, 5]            | Group11 | 8,51  | 12,00 |
| GO:0000287 | magnesium ion binding                                                           | GO_MolecularFunction-EBI-UniProt-GOA-ACAP-ARAP_08.05.2020_00h00 | 0,00687178 | 0,038141254 | 0,00687178 | 0,00956659 | [5]               | Group00 | 7,33  | 17,00 |
| GO:0006972 | hyperosmotic response                                                           | GO_BiologicalProcess-EBI-UniProt-GOA-ACAP-ARAP_08.05.2020_00h00 | 0,00733915 | 0,039571501 | 0,00733915 | 0,00964962 | [4]               | Group31 | 15,15 | 5,00  |
| GO:0070555 | response to interleukin-1                                                       | GO_BiologicalProcess-EBI-UniProt-GOA-ACAP-ARAP_08.05.2020_00h00 | 0,00682191 | 0,03802425  | 0,00682191 | 0,00968712 | [5]               | Group25 | 7,51  | 16,00 |
| GO:0120193 | tight junction organization                                                     | GO_BiologicalProcess-EBI-UniProt-GOA-ACAP-ARAP_08.05.2020_00h00 | 0,00669038 | 0,037931312 | 0,00669038 | 0,00969423 | [6]               | Group27 | 10,00 | 9,00  |
| GO:0040014 | regulation of multicellular organism growth                                     | GO_BiologicalProcess-EBI-UniProt-GOA-ACAP-ARAP_08.05.2020_00h00 | 0,00762354 | 0,039963081 | 0,00762354 | 0,0098413  | [3, 4, 5]         | Group07 | 10,53 | 8,00  |



|            |                                                           |                                                                 |            |             |            |            |                     |         |       |        |
|------------|-----------------------------------------------------------|-----------------------------------------------------------------|------------|-------------|------------|------------|---------------------|---------|-------|--------|
| GO:0071346 | cellular response to interferon-gamma                     | GO_BiologicalProcess-EBI-UniProt-GOA-ACAP-ARAP_08.05.2020_00h00 | 0,00668725 | 0,038076986 | 0,00668725 | 0,00989156 | [5, 6, 7, 8]        | Group39 | 7,73  | 15,00  |
| GO:0060333 | interferon-gamma-mediated signaling pathway               | GO_BiologicalProcess-EBI-UniProt-GOA-ACAP-ARAP_08.05.2020_00h00 | 0,00350715 | 0,027909299 | 0,00668725 | 0,00989156 | [5, 6, 7, 8, 9]     | Group39 | 10,31 | 10,00  |
| GO:0001832 | blastocyst growth                                         | GO_BiologicalProcess-EBI-UniProt-GOA-ACAP-ARAP_08.05.2020_00h00 | 0,00844242 | 0,04256656  | 0,00844242 | 0,0099902  | [3, 4, 8, 9]        | Group01 | 18,18 | 4,00   |
| GO:0046686 | response to cadmium ion                                   | GO_BiologicalProcess-EBI-UniProt-GOA-ACAP-ARAP_08.05.2020_00h00 | 0,00823525 | 0,04200295  | 0,00823525 | 0,01008108 | [5]                 | Group13 | 10,39 | 8,00   |
| GO:0051438 | regulation of ubiquitin-protein transferase activity      | GO_BiologicalProcess-EBI-UniProt-GOA-ACAP-ARAP_08.05.2020_00h00 | 0,00843374 | 0,042685699 | 0,00843374 | 0,01014907 | [5, 8, 9, 10, 11]   | Group18 | 11,29 | 7,00   |
| GO:0042592 | homeostatic process                                       | GO_BiologicalProcess-EBI-UniProt-GOA-ACAP-ARAP_08.05.2020_00h00 | 0,00822063 | 0,042090878 | 0,00822063 | 0,01023973 | [3]                 | Group08 | 4,75  | 100,00 |
| GO:0048013 | ephrin receptor signaling pathway                         | GO_BiologicalProcess-EBI-UniProt-GOA-ACAP-ARAP_08.05.2020_00h00 | 0,00883455 | 0,043546427 | 0,00883455 | 0,01028284 | [6, 7, 8]           | Group14 | 9,57  | 9,00   |
| GO:0032966 | negative regulation of collagen biosynthetic process      | GO_BiologicalProcess-EBI-UniProt-GOA-ACAP-ARAP_08.05.2020_00h00 | 0,00902835 | 0,044009034 | 0,00902835 | 0,01033891 | [4, 5, 6]           | Group03 | 25,00 | 3,00   |
| GO:0035457 | cellular response to interferon-alpha                     | GO_BiologicalProcess-EBI-UniProt-GOA-ACAP-ARAP_08.05.2020_00h00 | 0,00902835 | 0,044009034 | 0,00902835 | 0,01033891 | [6]                 | Group06 | 25,00 | 3,00   |
| GO:0006465 | signal peptide processing                                 | GO_BiologicalProcess-EBI-UniProt-GOA-ACAP-ARAP_08.05.2020_00h00 | 0,00902835 | 0,044009034 | 0,00902835 | 0,01033891 | [5, 6, 7]           | Group28 | 25,00 | 3,00   |
| GO:0006334 | nucleosome assembly                                       | GO_BiologicalProcess-EBI-UniProt-GOA-ACAP-ARAP_08.05.2020_00h00 | 0,0096128  | 0,045190427 | 0,0096128  | 0,01034104 | [6, 7, 8, 9]        | Group17 | 8,16  | 12,00  |
| GO:0007166 | cell surface receptor signaling pathway                   | GO_BiologicalProcess-EBI-UniProt-GOA-ACAP-ARAP_08.05.2020_00h00 | 0,01122932 | 0,049446441 | 0,00816427 | 0,01035112 | [3, 4, 5]           | Group55 | 4,47  | 150,00 |
| GO:0034097 | response to cytokine                                      | GO_BiologicalProcess-EBI-UniProt-GOA-ACAP-ARAP_08.05.2020_00h00 | 0,00028832 | 0,00793489  | 0,00816427 | 0,01035112 | [4]                 | Group55 | 5,68  | 72,00  |
| GO:0071310 | cellular response to organic substance                    | GO_BiologicalProcess-EBI-UniProt-GOA-ACAP-ARAP_08.05.2020_00h00 | 0,00166787 | 0,018831223 | 0,00816427 | 0,01035112 | [4]                 | Group55 | 4,76  | 138,00 |
| GO:0019221 | cytokine-mediated signaling pathway                       | GO_BiologicalProcess-EBI-UniProt-GOA-ACAP-ARAP_08.05.2020_00h00 | 0,00074874 | 0,012520107 | 0,00816427 | 0,01035112 | [4, 5, 6]           | Group55 | 6,01  | 50,00  |
| GO:0071345 | cellular response to cytokine stimulus                    | GO_BiologicalProcess-EBI-UniProt-GOA-ACAP-ARAP_08.05.2020_00h00 | 0,00042874 | 0,009439493 | 0,00816427 | 0,01035112 | [5]                 | Group55 | 5,70  | 67,00  |
| GO:0001959 | regulation of cytokine-mediated signaling pathway         | GO_BiologicalProcess-EBI-UniProt-GOA-ACAP-ARAP_08.05.2020_00h00 | 0,00229538 | 0,021972449 | 0,00816427 | 0,01035112 | [4, 5, 6, 7]        | Group55 | 8,67  | 15,00  |
| GO:0014015 | positive regulation of gliogenesis                        | GO_BiologicalProcess-EBI-UniProt-GOA-ACAP-ARAP_08.05.2020_00h00 | 0,00956808 | 0,045302629 | 0,00956808 | 0,01045129 | [5, 6, 7, 8, 9, 10] | Group34 | 10,13 | 8,00   |
| GO:0007166 | cell surface receptor signaling pathway                   | GO_BiologicalProcess-EBI-UniProt-GOA-ACAP-ARAP_08.05.2020_00h00 | 0,01122932 | 0,049446441 | 0,00952971 | 0,01057202 | [3, 4, 5]           | Group68 | 4,47  | 150,00 |
| GO:0070848 | response to growth factor                                 | GO_BiologicalProcess-EBI-UniProt-GOA-ACAP-ARAP_08.05.2020_00h00 | 0,00339685 | 0,02719537  | 0,00952971 | 0,01057202 | [4]                 | Group68 | 5,76  | 44,00  |
| GO:0071310 | cellular response to organic substance                    | GO_BiologicalProcess-EBI-UniProt-GOA-ACAP-ARAP_08.05.2020_00h00 | 0,00166787 | 0,018831223 | 0,00952971 | 0,01057202 | [4]                 | Group68 | 4,76  | 138,00 |
| GO:0071559 | response to transforming growth factor beta               | GO_BiologicalProcess-EBI-UniProt-GOA-ACAP-ARAP_08.05.2020_00h00 | 0,0002821  | 0,007928841 | 0,00952971 | 0,01057202 | [3, 5]              | Group68 | 8,59  | 22,00  |
| GO:0090287 | regulation of cellular response to growth factor stimulus | GO_BiologicalProcess-EBI-UniProt-GOA-ACAP-ARAP_08.05.2020_00h00 | 0,00116796 | 0,016240735 | 0,00952971 | 0,01057202 | [3, 4, 6]           | Group68 | 7,59  | 23,00  |

|            |                                                                                                 |                                                                 |            |             |            |            |                     |         |       |       |
|------------|-------------------------------------------------------------------------------------------------|-----------------------------------------------------------------|------------|-------------|------------|------------|---------------------|---------|-------|-------|
| GO:0007167 | enzyme linked receptor protein signaling pathway                                                | GO_BiologicalProcess-EBI-UniProt-GOA-ACAP-ARAP_08.05.2020_00h00 | 0,00289324 | 0,025311073 | 0,00952971 | 0,01057202 | [4, 5, 6]           | Group68 | 5,41  | 60,00 |
| GO:0071363 | cellular response to growth factor stimulus                                                     | GO_BiologicalProcess-EBI-UniProt-GOA-ACAP-ARAP_08.05.2020_00h00 | 0,00730586 | 0,039553437 | 0,00952971 | 0,01057202 | [5]                 | Group68 | 5,60  | 41,00 |
| GO:0090288 | negative regulation of cellular response to growth factor stimulus                              | GO_BiologicalProcess-EBI-UniProt-GOA-ACAP-ARAP_08.05.2020_00h00 | 0,01005185 | 0,0464283   | 0,00952971 | 0,01057202 | [3, 4, 5, 6, 7]     | Group68 | 7,83  | 13,00 |
| GO:0007169 | transmembrane receptor protein tyrosine kinase signaling pathway                                | GO_BiologicalProcess-EBI-UniProt-GOA-ACAP-ARAP_08.05.2020_00h00 | 0,00339685 | 0,02719537  | 0,00952971 | 0,01057202 | [5, 6, 7]           | Group68 | 5,76  | 44,00 |
| GO:0007179 | transforming growth factor beta receptor signaling pathway                                      | GO_BiologicalProcess-EBI-UniProt-GOA-ACAP-ARAP_08.05.2020_00h00 | 0,00053682 | 0,010744583 | 0,00952971 | 0,01057202 | [5, 6, 7, 8]        | Group68 | 9,05  | 18,00 |
| GO:0090101 | negative regulation of transmembrane receptor protein serine/threonine kinase signaling pathway | GO_BiologicalProcess-EBI-UniProt-GOA-ACAP-ARAP_08.05.2020_00h00 | 0,00893731 | 0,043726634 | 0,00952971 | 0,01057202 | [4, 5, 6, 7, 8, 9]  | Group68 | 8,59  | 11,00 |
| GO:0017015 | regulation of transforming growth factor beta receptor signaling pathway                        | GO_BiologicalProcess-EBI-UniProt-GOA-ACAP-ARAP_08.05.2020_00h00 | 0,00030373 | 0,008024428 | 0,00952971 | 0,01057202 | [5, 6, 7, 8, 9]     | Group68 | 11,02 | 14,00 |
| GO:0051607 | defense response to virus                                                                       | GO_BiologicalProcess-EBI-UniProt-GOA-ACAP-ARAP_08.05.2020_00h00 | 0,01005658 | 0,046288278 | 0,01005658 | 0,01065697 | [3, 4, 5, 6]        | Group19 | 6,90  | 18,00 |
| GO:0007160 | cell-matrix adhesion                                                                            | GO_BiologicalProcess-EBI-UniProt-GOA-ACAP-ARAP_08.05.2020_00h00 | 0,00948471 | 0,045232154 | 0,00948471 | 0,01068912 | [4]                 | Group32 | 7,08  | 17,00 |
| GO:0043090 | amino acid import                                                                               | GO_BiologicalProcess-EBI-UniProt-GOA-ACAP-ARAP_08.05.2020_00h00 | 0,01063148 | 0,047769345 | 0,01063148 | 0,01110052 | [6, 8, 9]           | Group09 | 13,89 | 5,00  |
| GO:0006446 | regulation of translational initiation                                                          | GO_BiologicalProcess-EBI-UniProt-GOA-ACAP-ARAP_08.05.2020_00h00 | 0,01105509 | 0,048842039 | 0,01105509 | 0,01121302 | [4, 6, 7, 8, 9]     | Group26 | 9,88  | 8,00  |
| GO:0043548 | phosphatidylinositol 3-kinase binding                                                           | GO_MolecularFunction-EBI-UniProt-GOA-ACAP-ARAP_08.05.2020_00h00 | 0,0015113  | 0,018149337 | 0,01122656 | 0,01122656 | [3]                 | Group57 | 17,65 | 6,00  |
| GO:0036312 | phosphatidylinositol 3-kinase regulatory subunit binding                                        | GO_MolecularFunction-EBI-UniProt-GOA-ACAP-ARAP_08.05.2020_00h00 | 0,00520889 | 0,033896301 | 0,01122656 | 0,01122656 | [4]                 | Group57 | 30,00 | 3,00  |
| GO:0043559 | insulin binding                                                                                 | GO_MolecularFunction-EBI-UniProt-GOA-ACAP-ARAP_08.05.2020_00h00 | 0,00097195 | 0,01475805  | 0,01122656 | 0,01122656 | [3, 4, 5]           | Group57 | 50,00 | 3,00  |
| GO:0048015 | phosphatidylinositol-mediated signaling                                                         | GO_BiologicalProcess-EBI-UniProt-GOA-ACAP-ARAP_08.05.2020_00h00 | 0,00497913 | 0,033558346 | 0,01122656 | 0,01122656 | [5, 6, 7]           | Group57 | 7,77  | 16,00 |
| GO:0014065 | phosphatidylinositol 3-kinase signaling                                                         | GO_BiologicalProcess-EBI-UniProt-GOA-ACAP-ARAP_08.05.2020_00h00 | 0,00869579 | 0,043347713 | 0,01122656 | 0,01122656 | [6, 7, 8]           | Group57 | 7,98  | 13,00 |
| GO:0014066 | regulation of phosphatidylinositol 3-kinase signaling                                           | GO_BiologicalProcess-EBI-UniProt-GOA-ACAP-ARAP_08.05.2020_00h00 | 0,00199253 | 0,020247202 | 0,01122656 | 0,01122656 | [5, 6, 7, 8, 9]     | Group57 | 9,49  | 13,00 |
| GO:0014068 | positive regulation of phosphatidylinositol 3-kinase signaling                                  | GO_BiologicalProcess-EBI-UniProt-GOA-ACAP-ARAP_08.05.2020_00h00 | 0,0013313  | 0,017241579 | 0,01122656 | 0,01122656 | [5, 6, 7, 8, 9, 10] | Group57 | 11,00 | 11,00 |
| GO:0006915 | apoptotic process                                                                               | GO_BiologicalProcess-EBI-UniProt-GOA-ACAP-ARAP_08.05.2020_00h00 | 0,01091582 | 0,048551518 | 0,01091582 | 0,01123222 | [4]                 | Group30 | 4,72  | 97,00 |
