# Supplementary material for: Analysis of the Role of FRMD5 in the Biology of Papillary Thyroid Carcinoma
Source: MDPI journal article supplement (doi:10.3390/ijms22136726), 2021-06-23

Figure S2. Summary of human phospho-kinase array analysis performed on FRMD5-knocked-down TPC1 and BCPAP cell lines. Cells were transfected with FRMD5-specific siRNA (siFRMD5) or non-targeting siRNA (siNEG; control). Graphical data are presented as mean  $\pm$  SD.

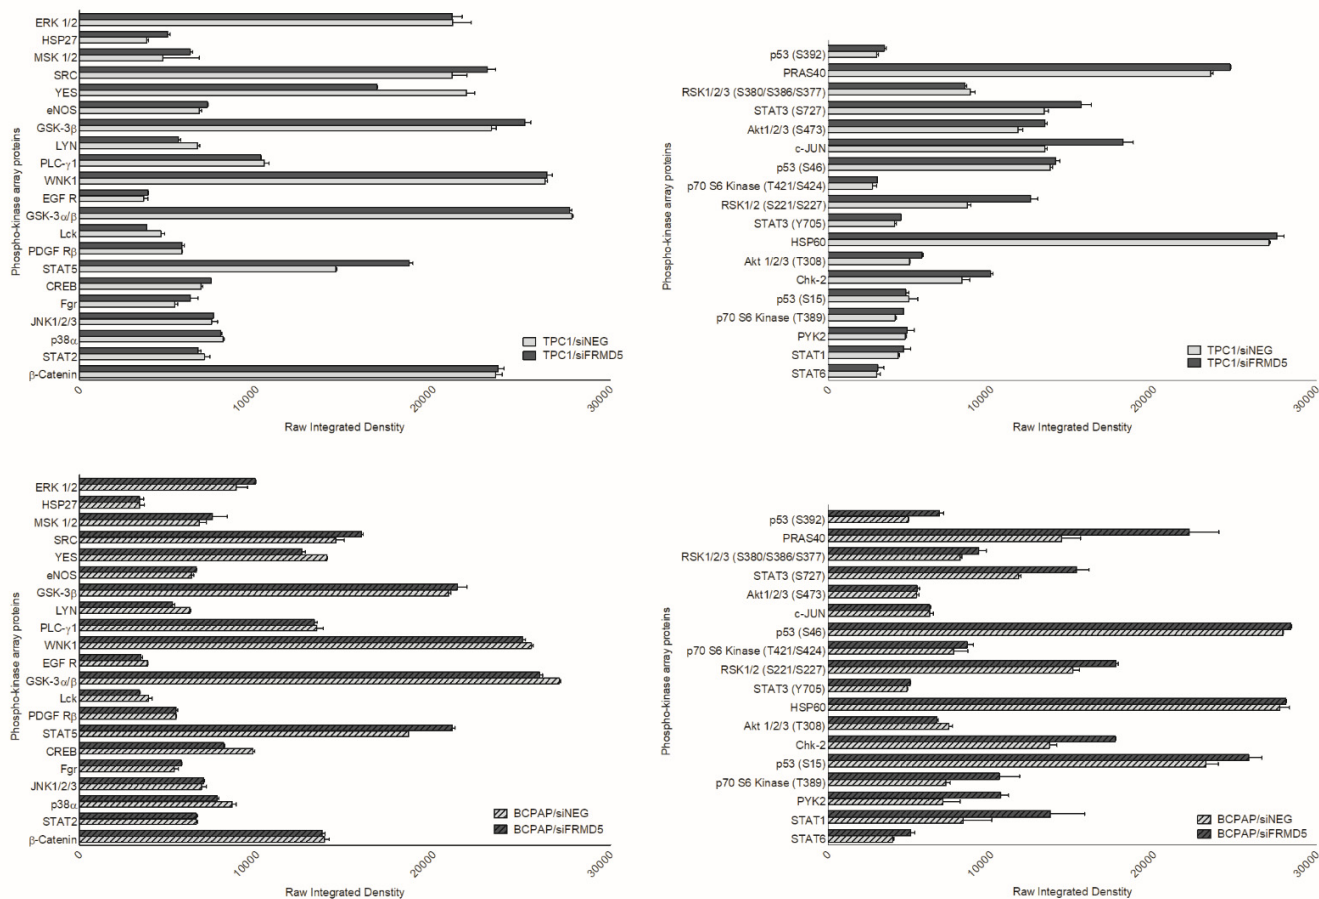

Supplement: s1 [file s1]
