# Supplementary material for: Analysis of the Role of FRMD5 in the Biology of Papillary Thyroid Carcinoma
Source: MDPI journal article supplement (doi:10.3390/ijms22136726), 2021-06-23
Supplement: s1 [file s1]

Supplementary Table S4. Genes downregulated in BCPAP siFRMD5 (in comparison with BCPAP siNEG).

| gene         | BCPAP siNEG 1 | BCPAP siNEG 2 | BCPAP siNEG 3 | BCPAP siFRMD5 1 | BCPAP siFRMD5 2 | BCPAP siFRMD5 3 | baseMean    | log2FoldChange | lfcSE       | stat         | pvalue      | padj        | Fold-change |
|--------------|---------------|---------------|---------------|-----------------|-----------------|-----------------|-------------|----------------|-------------|--------------|-------------|-------------|-------------|
| FRMD5        | 277,798781    | 226,3377961   | 294,4881154   | 49,87134676     | 51,1789431      | 50,96014633     | 94,86368746 | -2,390527682   | 0,225328463 | -10,60907995 | 2,70398E-26 | 1,16073E-22 | 5,243491131 |
| TRIM16       | 165,5568493   | 188,9428559   | 162,827805    | 22,78073864     | 37,71080018     | 45,5959204      | 95,5959204  | -2,314671528   | 0,25359335  | -9,127493015 | 7,01038E-20 | 1,1285E-16  | 4,974913797 |
| AMACR        | 1122,419317   | 874,3527472   | 845,2713483   | 292,4554285     | 366,3334874     | 303,078765      | 492,9189017 | -1,564748475   | 0,190281018 | -8,223355589 | 1,97887E-16 | 1,59274E-13 | 2,958259219 |
| CDH6         | 668,5410057   | 738,5500695   | 588,9762308   | 192,712735      | 148,1495721     | 180,5956063     | 641,4781636 | -1,935605246   | 0,241188178 | -8,025290708 | 1,01286E-15 | 7,24644E-13 | 3,825385776 |
| TNFRSF9      | 242,0216652   | 233,7183764   | 237,1986186   | 82,50321562     | 77,21735274     | 90,29780314     | 210,4052397 | -1,511989453   | 0,190148971 | -7,951604718 | 1,84111E-15 | 1,24788E-12 | 2,852030584 |
| IDO1         | 281,3063413   | 162,3727668   | 205,036094    | 40,02021653     | 38,60867637     | 46,48995805     | 64,48617109 | -2,374607928   | 0,308020388 | -7,709255689 | 1,26554E-14 | 8,14879E-12 | 5,185948675 |
| CYP1B1       | 1122,419317   | 991,9499935   | 1011,109366   | 395,8922959     | 261,2819727     | 364,7673632     | 358,9668833 | -1,610749729   | 0,210444846 | -7,654023193 | 1,94787E-14 | 1,14021E-11 | 3,054105141 |
| ARID5B       | 110,1373955   | 151,055877    | 64,3250491    | 24,62782556     | 21,54902867     | 26,82112965     | 135,1199366 | -2,170912105   | 0,317056529 | -6,847082156 | 7,53714E-12 | 2,94131E-09 | 4,503079991 |
| ADAMTS5      | 890,9203329   | 737,5659922   | 620,1336765   | 312,7733846     | 239,732944      | 260,1649576     | 264,1575869 | -1,467092342   | 0,224302193 | -6,540695485 | 6,12334E-11 | 2,13125E-08 | 2,764641363 |
| ALDH1A1      | 155,0341682   | 212,0686742   | 125,6348615   | 43,09869473     | 39,50655257     | 40,23169447     | 51,41168767 | -2,008034734   | 0,308519108 | -6,508623545 | 7,58425E-11 | 2,44175E-08 | 4,02233916  |
| LCA5         | 122,0631007   | 124,9778266   | 110,5586781   | 37,55743398     | 47,58743832     | 37,54958151     | 89,14738544 | -1,552724335   | 0,24206157  | -6,414584241 | 1,41208E-10 | 4,04105E-08 | 2,933706072 |
| NROB1        | 51,21038134   | 82,17046077   | 63,31997021   | 8,619738946     | 10,77451434     | 7,152301239     | 18,60394724 | -2,896137063   | 0,455015916 | -6,364913759 | 1,95399E-10 | 5,24241E-08 | 7,44430447  |
| Corf4        | 266,5745878   | 202,7199391   | 170,8634117   | 64,03234645     | 70,93221938     | 57,21840991     | 69,47554339 | -1,73817059    | 0,276194069 | -6,293294401 | 3,10798E-10 | 7,69703E-08 | 3,336118629 |
| DYNC2L1      | 202,7369891   | 353,2837774   | 231,1681452   | 85,58169382     | 79,91098133     | 87,61569018     | 143,5867965 | -1,640765927   | 0,263942801 | -6,216369299 | 5,0879E-10  | 1,17003E-07 | 3,118313393 |
| DNAJB4       | 250,4398101   | 277,0177809   | 217,0970407   | 89,89156329     | 98,76638142     | 86,72165252     | 198,1605292 | -1,439068729   | 0,232077104 | -6,200821637 | 5,61691E-10 | 1,24715E-07 | 2,711457822 |
| PTGS2        | 729,5725561   | 675,5691176   | 418,1128192   | 179,1674309     | 166,107096      | 224,4034514     | 203,5044571 | -1,680783986   | 0,272955632 | -6,157718644 | 7,38003E-10 | 1,61085E-07 | 3,206021247 |
| RUNX2        | 221,6778151   | 165,8170376   | 214,081804    | 85,58169382     | 98,76638142     | 70,62897474     | 194,6276718 | -1,233184011   | 0,206961356 | -5,958523044 | 2,54528E-09 | 5,2025E-07  | 2,350852482 |
| RAB2B        | 579,4489724   | 663,2681504   | 524,6511817   | 264,7491248     | 326,8269349     | 337,9462335     | 344,8430108 | -0,932958366   | 0,162342877 | -5,746838927 | 9,09273E-09 | 1,62634E-06 | 1,909186931 |
| HTN3         | 340,9348676   | 287,3505933   | 262,3255909   | 131,1431711     | 113,1324005     | 127,8473846     | 105,4554351 | -1,258635176   | 0,221749076 | -5,675943268 | 1,37926E-08 | 2,36829E-06 | 2,392692794 |
| GABARAPL1    | 317,0834571   | 425,1214258   | 282,4271687   | 146,5355621     | 152,6389531     | 126,0593093     | 182,0142704 | -1,272158427   | 0,224683127 | -5,662011413 | 1,49609E-08 | 2,50216E-06 | 2,415226392 |
| CD68         | 1922,844593   | 1848,589348   | 1764,918535   | 1102,095194     | 1134,017634     | 1188,176043     | 1373,383838 | -0,69380846    | 0,124474406 | -5,573904576 | 2,49092E-08 | 3,81882E-06 | 1,617547928 |
| CDKN2B       | 243,4246894   | 304,0799087   | 247,2494075   | 115,7507801     | 110,4387719     | 75,09916301     | 193,1742342 | -1,397314954   | 0,253606934 | -5,509766355 | 3,5931E-08  | 5,25818E-06 | 2,634108833 |
| RASSF9       | 68,74818317   | 63,47299065   | 43,21299236   | 15,26389531     | 15,26389531     | 21,45620372     | 36,56425396 | -1,773458739   | 0,328103384 | -5,405182709 | 6,47424E-08 | 8,77634E-06 | 3,418725856 |
| STBD1        | 119,2570524   | 141,7071419   | 106,5383626   | 30,78478195     | 45,79168593     | 61,68859819     | 118,0188546 | -1,434576418   | 0,265347553 | -5,406405301 | 6,43022E-08 | 8,77634E-06 | 2,703027928 |
| TMEM167B     | 454,5798234   | 499,9113062   | 474,3972371   | 259,207864      | 279,2394965     | 277,151673      | 394,4298556 | -0,811107428   | 0,150855091 | -5,376732205 | 7,58499E-08 | 9,86661E-06 | 1,754557743 |
| TFAP2B       | 132,5857818   | 96,4395827    | 110,5586781   | 27,09060811     | 35,01717159     | 41,12573212     | 36,90146288 | -1,726635278   | 0,321888918 | -5,364071827 | 8,13665E-08 | 1,04784E-05 | 3,309550484 |
| TUBB1        | 37,88165195   | 53,63221691   | 22,11173563   | 1,847086917     | 3,57613026      | 11,0613026      | -3,45747446 | 0,648462341    | 0,221749076 | -5,331804549 | 9,72416E-08 | 1,18139E-05 | 10,98508753 |
| ANKRD5       | 159,2432406   | 183,0383917   | 161,8177016   | 62,80095518     | 89,78761947     | 68,84089943     | 85,33288631 | -1,196658743   | 0,225099151 | -5,316140644 | 1,05991E-07 | 1,25225E-05 | 2,292082136 |
| DYX1C1       | 108,7343713   | 108,2485112   | 87,44186362   | 40,02021653     | 47,58743832     | 36,65554385     | 56,10919447 | -1,301586178   | 0,250146228 | -5,203301244 | 1,95779E-07 | 2,25111E-05 | 2,464997491 |
| LRIG3        | 296,739607    | 333,1101913   | 294,4881154   | 155,7709967     | 177,7794865     | 132,3175729     | 169,6541498 | -0,990340958   | 0,192584968 | -5,142358566 | 2,71311E-07 | 3,01020E-05 | 1,986654449 |
| PCDH10       | 65,24062281   | 111,2007433   | 52,26410239   | 17,23947789     | 12,57026673     | 20,56286606     | 23,78912636 | -2,191351568   | 0,435877075 | -5,027453132 | 4,97037E-07 | 5,08003E-05 | 4,567331698 |
| HCFC1R1      | 406,8770024   | 422,6612323   | 331,6760344   | 213,0306911     | 183,1667437     | 156,4565896     | 363,0407502 | -1,070252964   | 0,213736397 | -5,007350071 | 5,51845E-07 | 5,5958E-05  | 2,099801516 |
| ADD3         | 249,036786    | 281,9381678   | 239,2087763   | 141,609997      | 116,7239053     | 118,9070081     | 105,6684281 | -1,028129249   | 0,205450238 | -5,004273821 | 5,6073E-07  | 5,64147E-05 | 2,039378063 |
| NEAT1        | 544,3733688   | 1015,56785    | 515,6054717   | 288,7612547     | 272,9543632     | 265,5291835     | 428,0019279 | -1,329089179   | 0,266147934 | -4,993798602 | 5,92031E-07 | 5,78727E-05 | 2,512440062 |
| MMD          | 1106,284539   | 1123,324323   | 947,7893953   | 454,9990772     | 579,1301456     | 575,7602497     | 687,8988756 | -0,982971272   | 0,197096788 | -4,987251605 | 6,12443E-07 | 5,9301E-05  | 1,976531945 |
| SLC44A2      | 397,7573455   | 354,2678548   | 466,356606    | 200,1010827     | 245,1202011     | 210,0988489     | 286,5066862 | -0,8931125     | 0,18000141  | -4,961697252 | 6,98799E-07 | 6,61701E-05 | 1,85717852  |
| TMX4         | 2012,638138   | 2052,785403   | 1599,080517   | 751,7643752     | 1120,549491     | 868,1105629     | 951,0662649 | -1,048853582   | 0,213680638 | -4,908510144 | 9,17709E-07 | 8,44161E-05 | 2,068885182 |
| LOC100506844 | 486,1478667   | 666,2203825   | 464,3464482   | 289,3769503     | 277,4437442     | 290,5622378     | 311,9653328 | -0,918121333   | 0,187840486 | -4,887771272 | 1,01984E-06 | 9,12048E-05 | 1,889652998 |
| ID3          | 332,5167227   | 181,0702369   | 286,4474843   | 116,9821714     | 104,1536386     | 107,2845186     | 151,8276551 | -1,27939172    | 0,262330084 | -4,877030119 | 1,07695E-06 | 9,5648E-05  | 2,427366108 |
| HoxA3        | 958,265492    | 729,2013345   | 719,6364868   | 281,9886027     | 245,1202011     | 354,0389113     | 303,6242865 | -1,450220167   | 0,298787151 | -4,853689858 | 1,21185E-06 | 0,000106165 | 2,732497482 |
| DZIP3        | 237,1110807   | 300,6356379   | 162,8227805   | 90,50725893     | 123,0090387     | 96,55606673     | 210,6984144 | -1,187151986   | 0,245211518 | -4,841338589 | 1,28967E-06 | 0,00011001  | 2,277027927 |
| LPL          | 370,3983746   | 408,3921104   | 307,554141    | 189,0185612     | 174,1879818     | 173,443305      | 135,2495395 | -1,019234975   | 0,210529104 | -4,841302022 | 1,28991E-06 | 0,00011001  | 2,02684389  |
| FBXO36       | 429,3253888   | 472,3571397   | 562,8441796   | 195,7912132     | 234,3456868     | 172,5492674     | 240,9243378 | -1,280256763   | 0,264587124 | -4,838696398 | 1,30694E-06 | 0,00010728  | 2,428821999 |
| NEK11        | 58,92701415   | 68,88541621   | 50,25394461   | 25,2435212      | 17,0596477      | 11,62248951     | 32,2147841  | -1,702973534   | 0,353530354 | -4,817050399 | 1,45696E-06 | 0,000122632 | 3,255713015 |
| TRIL         | 58,22550207   | 48,71183004   | 43,21839236   | 6,772652029     | 5,387257168     | 15,19864013     | 14,79285615 | -2,475824877   | 0,514736056 | -4,809892079 | 1,51012E-06 | 0,000125466 | 5,562852595 |
| DACT1        | 159,2432406   | 253,3999239   | 144,7313605   | 59,10678134     | 57,46407646     | 78,67531363     | 62,92989699 | -1,521275828   | 0,316471801 | -4,806986989 | 1,53222E-06 | 0,000126487 | 2,870447816 |
| DZIP1        | 120,6600766   | 86,10677027   | 79,40123248   | 37,55743398     | 40,40442876     | 54,53629695     | 270,9552596 | -1,124966133   | 0,236198499 | -4,762799677 | 1,90925E-06 | 0,000150843 | 2,180964267 |
| CLUAP1       | 455,2813355   | 428,0736579   | 428,1636081   | 255,5136902     | 278,3416204     | 261,0589952     | 300,0598103 | -0,723550967   | 0,152167718 | -4,754957079 | 1,98489E-06 | 0,000155862 | 1,651241307 |

|          |             |             |             |             |             |             |             |              |             |              |             |             |             |
|----------|-------------|-------------|-------------|-------------|-------------|-------------|-------------|--------------|-------------|--------------|-------------|-------------|-------------|
| CD200    | 247,6337618 | 243,5591502 | 141,7161238 | 80,65612871 | 79,91098133 | 82,25146425 | 72,97730084 | -1,387259282 | 0,293069579 | -4,733549242 | 2,20627E-06 | 0,000171798 | 2,615812771 |
| BTBD19   | 105,928323  | 83,15453814 | 111,563757  | 41,25160781 | 26,03840965 | 45,5959204  | 50,44312347 | -1,402087795 | 0,297875456 | -4,706959798 | 2,51438E-06 | 0,000192165 | 2,642837637 |
| RCAN2    | 86,285985   | 61,5048359  | 57,28949063 | 15,39239097 | 18,85540009 | 23,24497903 | 21,88109065 | -1,847911793 | 0,393903567 | -4,691279664 | 2,71502E-06 | 0,000204468 | 3,598787621 |
| DNAL4    | 175,3780183 | 396,5831819 | 199,0056207 | 95,43282404 | 92,48124805 | 76,88723832 | 209,0945288 | -1,5447656   | 0,330056666 | -4,680304196 | 2,8645E-06  | 0,000214471 | 2,917566623 |
| GRB14    | 336,024283  | 347,8713519 | 193,9802262 | 107,1310412 | 100,5621338 | 140,3639118 | 162,1349799 | -1,340176818 | 0,286429106 | -4,678912818 | 2,884E-06   | 0,000214683 | 2,531823471 |
| WAC      | 1461,249648 | 2015,882502 | 1178,957541 | 698,8145502 | 808,0885752 | 676,7865047 | 1165,700554 | -1,093607675 | 0,234711275 | -4,659374259 | 3,17172E-06 | 0,000230765 | 2,13407026  |
| HHLA3    | 166,9598734 | 139,2469485 | 175,8888061 | 86,8130851  | 76,31947655 | 56,32437226 | 87,19813448 | -1,123301826 | 0,241453044 | -4,65225788  | 3,2832E-06  | 0,000235275 | 2,178449737 |
| OASL     | 187,3037235 | 169,7533471 | 193,9802262 | 92,97004149 | 87,99186708 | 92,97991611 | 77,69126753 | -1,004735243 | 0,215982702 | -4,65192459  | 3,28851E-06 | 0,000235275 | 2,006575225 |
| RAB27B   | 125,5706611 | 155,4842252 | 108,5485204 | 59,72247698 | 58,36195265 | 59,00648522 | 81,16513641 | -1,145302394 | 0,246713821 | -4,64223037  | 3,44668E-06 | 0,000245108 | 2,211924886 |
| IL12A    | 49,8073572  | 58,06056509 | 56,28441796 | 20,93365173 | 10,77451434 | 6,258263584 | 23,0740676  | -2,071329171 | 0,446771942 | -4,636211398 | 3,54853E-06 | 0,000249716 | 4,20273698  |
| CETN2    | 1253,602075 | 2379,007053 | 1295,546692 | 609,5386826 | 844,9014992 | 700,9255214 | 1292,163129 | -1,194684592 | 0,257820676 | -4,633781157 | 3,59047E-06 | 0,000251294 | 2,288947847 |
| BNIP2    | 1052,26811  | 1668,995227 | 933,7182908 | 567,6713791 | 434,5720782 | 598,1111911 | 733,393754  | -1,192359811 | 0,25770168  | -4,626899638 | 3,7118E-06  | 0,000253932 | 2,285262371 |
| MEIS2    | 669,2425178 | 1040,169785 | 683,4536467 | 374,9586441 | 387,8825161 | 380,860041  | 352,1397386 | -1,066893663 | 0,230623871 | -4,62611984  | 3,7258E-06  | 0,000253932 | 2,094917838 |
| STATH    | 293,9335587 | 251,4317692 | 179,9091217 | 91,12295457 | 95,17487664 | 117,1189328 | 85,82619962 | -1,262868091 | 0,272866686 | -4,628150511 | 3,68946E-06 | 0,000253932 | 2,399723342 |
| YIPF5    | 3721,521548 | 3994,862102 | 3500,689781 | 2488,026077 | 2441,325373 | 2752,741939 | 2245,585365 | -0,546701275 | 0,11817843  | -4,62606649  | 3,72676E-06 | 0,000253932 | 1,460741885 |
| SNCA     | 164,8553372 | 118,0892849 | 137,6958082 | 71,42069412 | 61,0558124  | 66,15878646 | 68,18245395 | -1,075820932 | 0,234684986 | -4,584106341 | 4,55932E-06 | 0,000302654 | 2,107921194 |
| GBP2     | 581,5535087 | 832,5294588 | 530,6816551 | 299,2280805 | 279,2394965 | 324,5356687 | 369,0865601 | -1,108892523 | 0,242031558 | -4,58160305  | 4,61425E-06 | 0,000304214 | 2,156800182 |
| GCNT3    | 21,74687427 | 19,68154749 | 25,1269723  | 5,541260751 | 8,080885752 | 6,258263584 | 653,3741572 | -1,746200698 | 0,382627163 | -4,563713366 | 5,02567E-06 | 0,000328531 | 3,354739395 |
| KIAA0020 | 749,2148941 | 858,6075092 | 653,3012799 | 451,3049034 | 470,487126  | 506,9193503 | 1036,355419 | -0,666184334 | 0,146560688 | -4,545450377 | 5,48179E-06 | 0,000351216 | 1,586870429 |
| INPP4A   | 206,2445495 | 276,5257422 | 203,0259362 | 131,1431711 | 117,6217815 | 109,0725939 | 163,1537475 | -0,940609794 | 0,207004512 | -4,543909631 | 5,52203E-06 | 0,000352043 | 1,919339328 |
| IFIT1    | 426,5193405 | 581,0976896 | 335,69635   | 139,76291   | 118,5196577 | 161,8208155 | 198,34868   | -1,67850101  | 0,371516759 | -4,51796849  | 6,24358E-06 | 0,000388429 | 3,200951927 |
| CNIH2    | 154,3326561 | 179,1020822 | 130,660256  | 60,33817262 | 65,54496221 | 72,41705005 | 74,24039925 | -1,234723498 | 0,274785402 | -4,493410096 | 7,00916E-06 | 0,000429829 | 2,353362394 |
| PPP6R3   | 1938,97937  | 2120,194703 | 1842,309609 | 1047,298282 | 1297,431101 | 1219,467361 | 1513,454917 | -0,728670893 | 0,16228313  | -4,490121006 | 7,11827E-06 | 0,000434451 | 1,657111746 |
| NRG1     | 634,8684262 | 489,0864551 | 649,2809644 | 334,9384276 | 331,3163158 | 362,9792879 | 308,6486862 | -0,782699145 | 0,174585898 | -4,483175074 | 7,35405E-06 | 0,000446724 | 1,70346468  |
| SNAPC3   | 546,477905  | 538,7823625 | 525,6562606 | 317,0832541 | 347,4780873 | 341,5223842 | 595,6687273 | -0,68080277  | 0,152681754 | -4,458966132 | 8,23559E-06 | 0,000488746 | 1,603031494 |
| LRRC46   | 70,15120732 | 40,83921104 | 43,21839236 | 17,85517353 | 17,95752389 | 20,56286606 | 43,65962859 | -1,455535693 | 0,326607773 | -4,456524962 | 8,32989E-06 | 0,000492075 | 2,742583781 |
| TUBA1A   | 683,9742713 | 650,4751445 | 599,0270197 | 334,322732  | 431,8784496 | 381,7540786 | 280,1142236 | -0,75511984  | 0,169555522 | -4,453525489 | 8,44717E-06 | 0,000496724 | 1,687771784 |
| C5orf28  | 350,0545245 | 307,0321408 | 280,4170109 | 174,8576515 | 189,4518771 | 199,370397  | 230,8202346 | -0,738490172 | 0,166276243 | -4,441345069 | 8,93983E-06 | 0,000518591 | 1,668428858 |
| TWF1     | 2101,028659 | 2806,096633 | 1776,979481 | 1240,011017 | 890,6931851 | 1227,5137   | 1345,875397 | -0,993368971 | 0,223967689 | -4,435322676 | 9,19345E-06 | 0,000530911 | 1,990828535 |
| CHEK1    | 173,9749941 | 144,659374  | 168,8532539 | 73,26778104 | 101,46001   | 99,23817969 | 177,4102773 | -0,837789874 | 0,189603345 | -4,418645002 | 9,93216E-06 | 0,000565958 | 1,787309987 |
| FAM49B   | 547,1794171 | 470,8810237 | 453,2905804 | 293,0711242 | 297,1970204 | 353,1448737 | 441,9696588 | -0,643886809 | 0,146822611 | -4,385474439 | 1,15733E-05 | 0,000639662 | 1,562533163 |
| IFIT2    | 445,4601665 | 241,0989567 | 444,2448703 | 152,0768228 | 186,7582485 | 164,5029285 | 179,7129057 | -1,165861521 | 0,266386654 | -4,37657631  | 1,20558E-05 | 0,00065948  | 2,243671588 |
| MED12L   | 109,4358834 | 122,5176331 | 103,5231259 | 50,4870424  | 54,77044788 | 42,01976978 | 48,59697302 | -1,190118914 | 0,272847912 | -4,361839925 | 1,28973E-05 | 0,000694944 | 2,281715494 |
| CHMP2A   | 1313,932113 | 1382,628711 | 1298,561929 | 761,6155054 | 944,5657568 | 809,1040777 | 1003,30401  | -0,668726598 | 0,153501925 | -4,356470427 | 1,32177E-05 | 0,000706294 | 1,589669219 |
| LPAR1    | 320,5910174 | 469,4049076 | 295,4931943 | 176,0889527 | 152,6389531 | 181,4896439 | 276,9802861 | -1,092061419 | 0,252037713 | -4,332928611 | 1,47139E-05 | 0,000779775 | 2,131784225 |
| CDH18    | 300,9486794 | 458,0880178 | 263,3306698 | 145,3041708 | 156,2304579 | 157,3506273 | 123,6247447 | -1,160443645 | 0,269544967 | -4,305195008 | 1,66839E-05 | 0,00086635  | 2,235261539 |
| LRRC73   | 46,29979683 | 46,2516366  | 39,1980768  | 15,39239097 | 14,36601911 | 12,51652717 | 18,23508224 | -1,638035889 | 0,380823108 | -4,30130382  | 1,69796E-05 | 0,000874653 | 3,112418131 |
| SIPA1L2  | 292,5305345 | 135,310639  | 247,2494075 | 99,12699787 | 85,2982385  | 89,40376549 | 99,87661731 | -1,295988897 | 0,301266932 | -4,301796053 | 1,69419E-05 | 0,000874653 | 2,455452471 |
| PIPA     | 333,2182348 | 516,6406216 | 295,4931943 | 189,6342568 | 164,3113436 | 182,3836816 | 296,3254278 | -1,097519826 | 0,256675012 | -4,275912236 | 1,90356E-05 | 0,000972781 | 2,139865065 |
| TUBB2A   | 684,6757834 | 705,0914388 | 717,626329  | 401,4335566 | 453,4274783 | 429,1380743 | 819,5339819 | -0,715584136 | 0,167540094 | -4,27112173  | 1,94492E-05 | 0,000986091 | 1,642147976 |
| EIF4A2   | 3236,075194 | 3011,276766 | 2887,591657 | 1839,082874 | 2268,933144 | 1817,578552 | 2316,573178 | -0,624881518 | 0,146664925 | -4,260606385 | 2,03873E-05 | 0,001017627 | 1,542084176 |
| RBP1     | 575,2399    | 407,9000717 | 406,0518724 | 217,3405606 | 251,4053345 | 243,1782421 | 175,0929984 | -0,966052826 | 0,22711353  | -4,253611946 | 2,1035E-05  | 0,001041878 | 1,953488586 |
| MNS1     | 94,00261781 | 120,5494784 | 96,48757365 | 46,79286856 | 45,79168593 | 50,96014633 | 58,02884579 | -1,122393214 | 0,264451238 | -4,244235057 | 2,1934E-05  | 0,001065911 | 2,177078177 |
| ZDHHC3   | 1081,731617 | 581,5897283 | 1031,210943 | 448,2264252 | 521,6660691 | 387,1183046 | 675,267729  | -0,988041852 | 0,233546449 | -4,230601056 | 2,33068E-05 | 0,001124137 | 1,983491001 |
| DPDC     | 595,5837501 | 706,5675549 | 613,0981242 | 420,5201214 | 404,9421638 | 425,5619237 | 454,4559579 | -0,61599233  | 0,145649494 | -4,229278902 | 2,34442E-05 | 0,001126544 | 1,532611812 |
| CEP120   | 408,2800266 | 489,0864551 | 372,884269  | 210,5679085 | 205,6136486 | 282,5158989 | 276,3927579 | -0,866767571 | 0,205399591 | -4,219908934 | 2,44401E-05 | 0,001165702 | 1,823572516 |
| ZMYND10  | 84,88296085 | 30,9984373  | 59,29965464 | 17,23947789 | 17,0596477  | 9,834414204 | 22,14500139 | -1,973595609 | 0,467823493 | -4,218675719 | 2,45741E-05 | 0,00116777  | 3,927457352 |
| BSC12    | 321,2925295 | 367,0608607 | 352,7826912 | 206,2580391 | 208,3072772 | 230,661715  | 241,1753968 | -0,692134249 | 0,164148089 | -4,216523355 | 2,48098E-05 | 0,00117033  | 1,615671893 |
| TCTN2    | 133,2872939 | 210,5925581 | 169,8583328 | 83,7346069  | 81,70673372 | 80,46338894 | 148,8709135 | -1,065573841 | 0,252698335 | -4,216782198 | 2,47813E-05 | 0,00117033  | 2,093002218 |
| DLX2     | 422,310268  | 279,4779743 | 314,5896933 | 187,1714742 | 167,9028484 | 164,5029285 | 193,8696529 | -0,965777775 | 0,229337905 | -4,211156354 | 2,54067E-05 | 0,001189772 | 1,953116187 |

|            |             |             |              |             |             |             |             |               |             |              |             |             |             |
|------------|-------------|-------------|--------------|-------------|-------------|-------------|-------------|---------------|-------------|--------------|-------------|-------------|-------------|
| MEX3C      | 549,9854654 | 542,2266333 | 527,6664184  | 323,8559061 | 323,2354301 | 299,5026144 | 449,1799566 | -0,774909478  | 0,184957046 | -4,189672653 | 2,79357E-05 | 0,001280271 | 1,711082686 |
| IAH1       | 611,0170157 | 486,6262617 | 672,3977789  | 334,9384276 | 365,4356112 | 297,7145391 | 619,7161842 | -0,824106449  | 0,196985498 | -4,18358944  | 2,86942E-05 | 0,001292042 | 1,770438156 |
| TP53       | 4712,056596 | 4039,145584 | 4407,270942  | 2492,951642 | 2701,70947  | 2810,854387 | 3533,628775 | -0,716988192  | 0,171343806 | -4,184500219 | 2,85794E-05 | 0,001292042 | 1,64376922  |
| FAM76A     | 152,929632  | 174,673734  | 135,6856504  | 80,65612871 | 96,07275283 | 77,78127597 | 118,3330841 | -0,873403702  | 0,20935472  | -4,171884455 | 3,02091E-05 | 0,001346133 | 1,831979935 |
| SMR3B      | 291,8290224 | 282,9222452 | 230,1630663  | 141,609997  | 155,3325817 | 125,1652717 | 102,2518487 | -0,933868587  | 0,223838802 | -4,172058556 | 3,0186E-05  | 0,001346133 | 1,91039185  |
| MIS18BP1   | 388,6376885 | 580,6056509 | 401,026478   | 269,6746899 | 253,2010869 | 253,906694  | 476,0999546 | -0,821712872  | 0,198288733 | -4,144022    | 3,41267E-05 | 0,001510253 | 1,767503255 |
| CRISPLD1   | 49,8073572  | 45,26755923 | 55,27933907  | 26,47491248 | 17,95752389 | 19,66882841 | 163,3319044 | -1,198258574  | 0,289806467 | -4,134685426 | 3,55441E-05 | 0,001556929 | 2,294625276 |
| POP5       | 853,7401931 | 889,6059465 | 711,5958557  | 385,42547   | 496,5255357 | 582,912551  | 507,5102642 | -0,74880028   | 0,181296459 | -4,130253192 | 3,62364E-05 | 0,001581872 | 1,680394863 |
| STPG1      | 311,4713605 | 361,1563964 | 335,69635    | 147,7669534 | 211,8987819 | 154,6685143 | 256,8277694 | -0,974470309  | 0,236625922 | -4,118189164 | 3,81861E-05 | 0,001661354 | 1,964919637 |
| CKAP2      | 453,8783113 | 402,9796848 | 439,2194759  | 272,7531681 | 299,890649  | 288,7741625 | 565,5707897 | -0,589410915  | 0,143389723 | -4,110552003 | 3,94714E-05 | 0,001705749 | 1,504632246 |
| PALM2      | 167,6613855 | 235,1944925 | 116,5891515  | 72,6520854  | 69,13646699 | 71,52301239 | 86,88936316 | -1,290527525  | 0,31429052  | -4,106161158 | 4,02289E-05 | 0,001726892 | 2,446174842 |
| ACSM3      | 28,761995   | 40,83921104 | 35,17776123  | 13,54530406 | 14,36601911 | 8,940376549 | 33,86998814 | -1,504567458  | 0,366527644 | -4,104922191 | 4,04451E-05 | 0,001730405 | 2,83739589  |
| MARK4      | 484,0433305 | 532,8778983 | 516,6105506  | 324,4716017 | 332,214192  | 299,5026144 | 410,979959  | -0,681418596  | 0,16623307  | -4,099175921 | 4,14624E-05 | 0,00176222  | 1,603715907 |
| RAB3A      | 230,09596   | 264,224775  | 243,2290919  | 123,1391278 | 152,6389531 | 126,953347  | 127,0547018 | -0,876614553  | 0,214127965 | -4,093881674 | 4,24211E-05 | 0,001791143 | 1,836061715 |
| CABIN1     | 279,2018051 | 295,2232123 | 243,2290919  | 150,854315  | 184,9624961 | 150,198326  | 293,7617501 | -0,756548545  | 0,184854554 | -4,092669236 | 4,26436E-05 | 0,001794654 | 1,689444017 |
| KIAA0513   | 107,3313472 | 178,1180048 | 117,55942304 | 73,26778104 | 59,25982885 | 67,94686177 | 229,8755961 | -1,012582935  | 0,248338309 | -4,077433486 | 4,55356E-05 | 0,001897757 | 2,017519944 |
| TMEM60     | 185,1991873 | 171,7215018 | 207,0462518  | 104,052563  | 126,6005435 | 105,4964433 | 229,3552445 | -0,744489944  | 0,182828403 | -4,072069396 | 4,65973E-05 | 0,001935742 | 1,675381844 |
| KCNK3      | 434,9374854 | 712,4720191 | 479,4226316  | 297,3809936 | 275,6479918 | 283,4099366 | 1244,653188 | -0,927549601  | 0,228782503 | -4,054285581 | 5,02878E-05 | 0,00206503  | 1,902042657 |
| SMA5       | 1527,191783 | 1887,460404 | 1498,572628  | 1033,752978 | 1145,690024 | 1124,69937  | 815,9066393 | -0,574095184  | 0,141769022 | -4,049510796 | 5,13248E-05 | 0,002098289 | 1,488743474 |
| SERTAD2    | 175,3780183 | 169,7533471 | 167,848175   | 81,27182434 | 89,78761947 | 82,25146425 | 177,165294  | -1,019527574  | 0,251936821 | -4,046758907 | 5,19317E-05 | 0,00211638  | 2,027255004 |
| ARMC1      | 1210,809838 | 1183,845081 | 1169,911831  | 677,8808985 | 881,7144232 | 630,2965467 | 1279,388524 | -0,703560317  | 0,173949299 | -4,044628638 | 5,24061E-05 | 0,002128978 | 1,628518735 |
| MAP1LC3A   | 82,07691256 | 73,80580309 | 85,43170584  | 25,85921684 | 29,62991442 | 40,23169447 | 28,20007113 | -1,340402135  | 0,332384938 | -4,032680131 | 5,51443E-05 | 0,002220551 | 2,532218916 |
| PDE5A      | 86,98749707 | 87,09084764 | 38,1929979   | 22,78073864 | 25,14053345 | 9,834414204 | 27,57359316 | -1,879359689  | 0,465886225 | -4,033945604 | 5,4848E-05  | 0,002220551 | 3,679117338 |
| PLA2G4A    | 55,41945378 | 60,02871984 | 56,28441796  | 27,0960811  | 20,65115248 | 19,66882841 | 42,14567536 | -1,0337043161 | 0,331563635 | -4,032538608 | 5,51775E-05 | 0,002220551 | 2,526330102 |
| TSPYL2     | 218,8717668 | 334,0942686 | 184,9345162  | 126,217606  | 87,99186708 | 99,23817969 | 116,324614  | -1,235806152  | 0,306523739 | -4,03168171  | 5,53792E-05 | 0,002221722 | 2,35512911  |
| CMAS       | 930,9065211 | 1349,662119 | 959,850342   | 621,2368997 | 719,1988319 | 594,5350405 | 748,9815971 | -0,745752207  | 0,185542249 | -4,019312095 | 5,83683E-05 | 0,002333825 | 1,676848334 |
| PLEKHG4B   | 33,67257951 | 33,95066942 | 24,12189341  | 17,85517353 | 4,489380973 | 5,364225929 | 102,7281168 | -1,653864118  | 0,411548576 | -4,018636475 | 5,85359E-05 | 0,002333825 | 3,146753386 |
| ARL14      | 619,4351606 | 870,9084764 | 657,3215955  | 471,0071638 | 395,9634019 | 414,8334719 | 309,1707549 | -0,745235919  | 0,186220723 | -4,001895756 | 6,2837E-05  | 0,002455122 | 1,676248359 |
| FBXW4      | 404,7724662 | 669,6646533 | 481,4327894  | 273,9845593 | 281,9331251 | 255,6947693 | 495,1336794 | -0,940686147  | 0,234925924 | -4,004181954 | 6,22325E-05 | 0,002455122 | 1,919440909 |
| NCBP2      | 1236,064273 | 1210,415171 | 1048,297285  | 777,623592  | 849,3908802 | 823,4086801 | 834,8138732 | -0,514170632  | 0,128721848 | -3,994431724 | 6,48496E-05 | 0,002515461 | 1,428172884 |
| GLCC1      | 89,09203329 | 115,6290915 | 70,35552245  | 30,16908631 | 41,30230496 | 31,29131792 | 44,6391845  | -1,433045096  | 0,35894768  | -3,992350904 | 6,54215E-05 | 0,002530023 | 2,700160371 |
| OPN3       | 237,8125928 | 221,4174093 | 211,0665674  | 139,76291   | 149,0474483 | 156,4565896 | 385,3053066 | -0,595267459  | 0,149212527 | -3,989393334 | 6,62425E-05 | 0,002554104 | 1,510752636 |
| RABGGTA    | 420,2057318 | 747,4067659 | 516,6105506  | 272,7531681 | 334,0099444 | 264,6351458 | 347,7401054 | -0,953368308  | 0,239047084 | -3,98820305  | 6,65757E-05 | 0,002559288 | 1,936388334 |
| TMC03      | 152,929632  | 144,659374  | 111,563757   | 62,80095518 | 72,72797177 | 92,08587845 | 268,5369202 | -0,861965714  | 0,217341532 | -3,965950305 | 7,31041E-05 | 0,002752733 | 1,817513038 |
| ST6GALNAC5 | 284,1123896 | 251,9238079 | 202,0208573  | 136,0687362 | 124,8047911 | 142,1519871 | 121,2412111 | -0,875813392  | 0,221478848 | -3,954388428 | 7,67307E-05 | 0,002880867 | 1,835042392 |
| CLDND1     | 1740,451454 | 3187,918655 | 1902,614343  | 1236,316843 | 978,6850522 | 1116,653031 | 1214,256298 | -1,036147973  | 0,262423858 | -3,948375657 | 7,86833E-05 | 0,002928564 | 2,050744803 |
| PEG10      | 1266,229292 | 995,886303  | 1088,50044   | 549,20051   | 773,0714036 | 581,1244757 | 453,9072678 | -0,816570918  | 0,207012142 | -3,944555672 | 7,99481E-05 | 0,002958538 | 1,761214855 |
| POU2F1     | 179,5870907 | 212,5607129 | 164,8329383  | 107,7467368 | 105,949391  | 119,8010458 | 183,3443292 | -0,748109881  | 0,189874019 | -3,940032894 | 8,14704E-05 | 0,003006236 | 1,679590905 |
| CSN3       | 172,57197   | 178,6100435 | 133,6754927  | 83,11891126 | 77,21735274 | 84,93357721 | 60,84394561 | -0,987656476  | 0,25147125  | -3,9275125   | 8,5829E-05  | 0,003122332 | 1,982961238 |
| BIN3       | 406,8770024 | 398,059298  | 420,1229769  | 225,3446039 | 281,9331251 | 210,0988489 | 365,2143335 | -0,772629564  | 0,196960018 | -3,922773626 | 8,75354E-05 | 0,003166519 | 1,70838077  |
| APOO       | 394,9512972 | 626,8572875 | 406,0518724  | 281,9886027 | 271,1586108 | 255,6947693 | 308,7596608 | -0,822821115  | 0,210347898 | -3,91171541  | 9,16429E-05 | 0,003278269 | 1,76886153  |
| ATP1B1     | 498,775084  | 619,4767072 | 430,1737659  | 275,8316463 | 342,9887064 | 305,760878  | 687,1307357 | -0,748959489  | 0,192009399 | -3,900639724 | 9,59388E-05 | 0,003422439 | 1,680580313 |
| HTR7       | 96,10715402 | 112,1848207 | 77,3910747   | 28,93769503 | 27,83416204 | 38,44361916 | 35,77758139 | -1,592255075  | 0,409323966 | -3,889962979 | 0,00010026  | 0,003556865 | 3,015202873 |
| GPAM       | 615,9276002 | 752,3271528 | 537,7172073  | 428,5241647 | 379,8016304 | 375,4958151 | 318,7795021 | -0,688690264  | 0,17711501  | -3,888378873 | 0,000100916 | 0,00357032  | 1,61181958  |
| RBM47      | 184,4976752 | 153,0240317 | 143,7262816  | 84,96599818 | 101,46001   | 108,1785562 | 185,2472996 | -0,717763583  | 0,184958617 | -3,880671228 | 0,000104169 | 0,003635795 | 1,644630607 |
| SCAMP4     | 1165,211554 | 1253,714575 | 1224,186091  | 799,788635  | 890,6931851 | 803,7398517 | 1201,47294  | -0,547142172  | 0,141141485 | -3,876551045 | 0,000105948 | 0,003667723 | 1,461188366 |
| SSH1       | 492,4614754 | 647,5229124 | 463,3413693  | 265,3648204 | 323,2354301 | 299,5026144 | 399,0201126 | -0,855812833  | 0,220905746 | -3,874108528 | 0,000107016 | 0,003690378 | 1,80977812  |
| CCDC104    | 432,8329491 | 681,4735818 | 410,072188   | 262,2863422 | 258,5883441 | 297,7145391 | 367,3795837 | -0,900685256  | 0,23300824  | -3,865465256 | 0,000110878 | 0,003787486 | 1,866952544 |
| C1orf233   | 621,5396968 | 550,0992523 | 574,9051263  | 307,2321238 | 416,6145543 | 371,9196644 | 290,3814035 | -0,674909964  | 0,174793473 | -3,861185151 | 0,000112838 | 0,003833218 | 1,596497135 |
| SERPINB6   | 1549,64017  | 2359,325505 | 1465,405025  | 869,9779379 | 1073,859929 | 988,8056463 | 1210,768158 | -0,875189819  | 0,226840831 | -3,858167042 | 0,000114241 | 0,003852787 | 1,834249407 |

|              |             |             |             |             |             |             |             |              |             |              |             |             |             |
|--------------|-------------|-------------|-------------|-------------|-------------|-------------|-------------|--------------|-------------|--------------|-------------|-------------|-------------|
| C2CD3        | 484,0433305 | 706,0755162 | 472,3870793 | 284,4513852 | 353,7632207 | 318,2774051 | 369,4737327 | -0,801868169 | 0,208619186 | -3,843693307 | 0,000121196 | 0,004036862 | 1,743357167 |
| WIPI1        | 249,738298  | 283,4142838 | 259,3103542 | 181,6302135 | 153,5368293 | 167,1850415 | 155,5508487 | -0,656404409 | 0,170784852 | -3,843458015 | 0,000121313 | 0,004036862 | 1,576149529 |
| COPG1        | 3432,498574 | 3772,460615 | 3152,932485 | 1965,916175 | 2499,687326 | 2174,299577 | 2676,404881 | -0,642154805 | 0,167112684 | -3,842645506 | 0,000121715 | 0,004039816 | 1,666058414 |
| KLHDC3       | 813,0524928 | 1042,13794  | 782,956457  | 477,7798158 | 615,9430696 | 515,8597269 | 570,3917768 | -0,715535514 | 0,186493299 | -3,836789409 | 0,000124653 | 0,004096713 | 1,642092633 |
| TMEM67       | 197,1248926 | 185,0065464 | 155,7872283 | 76,34625923 | 121,2132863 | 97,45010438 | 120,6832944 | -0,878014959 | 0,228846781 | -3,836693508 | 0,000124702 | 0,004096713 | 1,837844823 |
| TRIM5        | 260,2609791 | 374,9334797 | 224,132593  | 137,3001275 | 181,3709913 | 137,6817989 | 265,2145953 | -0,920577197 | 0,240120667 | -3,833810768 | 0,000126173 | 0,004124007 | 1,892872447 |
| SMAD7        | 429,3253888 | 447,7552054 | 358,8131645 | 240,7369948 | 266,6692298 | 236,0259409 | 376,1974726 | -0,736426476 | 0,192426152 | -3,827060254 | 0,000129683 | 0,00421731  | 1,66604397  |
| BTC          | 33,67257951 | 54,1242556  | 46,23362904 | 13,54530406 | 22,44690487 | 11,62248951 | 24,11092543 | -1,507699181 | 0,394506478 | -3,821734918 | 0,000132516 | 0,004298595 | 2,843561843 |
| ACVR1        | 482,6403063 | 629,317481  | 428,1636081 | 335,5541232 | 335,8056968 | 286,9860872 | 449,9800259 | -0,687519902 | 0,180612953 | -3,806592438 | 0,000140895 | 0,004547472 | 1,610512549 |
| LOC100134868 | 16,13477768 | 18,69747011 | 12,06094671 | 5,541260751 | 6,285133363 | 1,78807531  | 35,70075584 | -1,786618189 | 0,470038637 | -3,801002829 | 0,000144112 | 0,004630167 | 3,450052198 |
| PCDH18       | 51,91189341 | 29,52232123 | 29,14728787 | 11,0825215  | 13,46814292 | 6,258263584 | 15,46305892 | -1,840077517 | 0,484636007 | -3,796823781 | 0,000146562 | 0,004662878 | 3,58029265  |
| TBC1D8       | 268,679124  | 267,1770072 | 243,2290919 | 177,9360397 | 169,6986008 | 144,8341001 | 145,9608226 | -0,660902001 | 0,174048997 | -3,797218101 | 0,000146329 | 0,004662878 | 1,581070831 |
| SLC4A4       | 37,88165195 | 35,42678548 | 39,1980768  | 15,39239097 | 17,95752389 | 16,09267779 | 140,380926  | -1,187244325 | 0,312888705 | -3,794462073 | 0,000147964 | 0,004687126 | 2,277173672 |
| ZNF720       | 56,12096585 | 89,55104108 | 57,28949685 | 24,01212992 | 26,93628584 | 19,66882841 | 46,54076777 | -1,529977992 | 0,40324358  | -3,794178179 | 0,000148133 | 0,004687126 | 2,887814337 |
| SIX1         | 881,0991639 | 1197,130126 | 892,5100563 | 593,530596  | 482,1595165 | 608,839643  | 456,285883  | -0,819132917 | 0,216743445 | -3,779274233 | 0,000157286 | 0,004952398 | 1,764345274 |
| MIER1        | 1374,262151 | 2326,850952 | 1325,699059 | 916,1551108 | 929,3018615 | 938,7395376 | 1068,978984 | -0,853568612 | 0,225974716 | -3,777284145 | 0,000158548 | 0,004975483 | 1,806965063 |
| ZNF362       | 395,6528093 | 390,6787177 | 340,7217445 | 174,8575615 | 263,9756012 | 206,5226983 | 320,4281482 | -0,809330387 | 0,215074348 | -3,763026103 | 0,00016787  | 0,005234445 | 1,752397895 |
| SAMD15       | 129,0782215 | 109,2325886 | 84,42662694 | 43,09869473 | 58,36195265 | 51,85418398 | 51,50176701 | -1,085803231 | 0,288687559 | -3,761170845 | 0,00016912  | 0,005253789 | 2,122556903 |
| UNC5D        | 470,7146011 | 773,4848163 | 393,9909257 | 244,4311687 | 285,5246299 | 250,3305434 | 201,5397238 | -1,073174322 | 0,285396404 | -3,760293776 | 0,000169714 | 0,005253789 | 2,104057779 |
| C20orf96     | 97,51017817 | 131,3743295 | 93,47233697 | 41,86730345 | 63,74920982 | 61,68859819 | 83,16406506 | -0,967091609 | 0,25772396  | -3,752431905 | 0,000175127 | 0,005408371 | 1,584895661 |
| RTL1         | 131,8842698 | 162,3727668 | 150,7618338 | 61,5695639  | 72,72797177 | 88,50972783 | 55,65217782 | -1,004888922 | 0,268313424 | -3,745205535 | 0,000180246 | 0,00552669  | 2,006788982 |
| SLC1A1       | 84,88296085 | 59,53668116 | 67,34028578 | 33,2475645  | 26,03840965 | 46,48995805 | 77,43497993 | -1,001727334 | 0,267391111 | -3,746330057 | 0,000179462 | 0,00552669  | 2,002396028 |
| SLC31A1      | 873,3825311 | 1469,719559 | 974,9265254 | 525,18838   | 648,2666126 | 684,8328436 | 907,6370872 | -0,838538186 | 0,223869932 | -3,745648992 | 0,000179928 | 0,00552669  | 1,788237288 |
| GMPPB        | 217,4687427 | 227,3218735 | 222,1224352 | 136,6844319 | 136,6844319 | 144,8341001 | 174,6723884 | -0,613860534 | 0,164071754 | -3,74141507  | 0,000182987 | 0,005570938 | 1,530386823 |
| MAP1B        | 3899,004103 | 3561,868057 | 4689,698111 | 2742,924072 | 2848,961166 | 2741,11945  | 3147,661495 | -0,543584482 | 0,145472941 | -3,736670751 | 0,000186473 | 0,005663673 | 1,457589511 |
| NDUFV2       | 886,0097484 | 1210,907209 | 760,8447214 | 444,5322513 | 584,5174027 | 575,7602497 | 723,7861266 | -0,835312271 | 0,224192598 | -3,725869082 | 0,000194643 | 0,005856584 | 1,784243196 |
| UPF3A        | 176,0795304 | 187,9587785 | 162,827805  | 110,825215  | 105,0515148 | 111,7547069 | 188,6179942 | -0,688924333 | 0,184969413 | -3,724531112 | 0,000195679 | 0,005874006 | 1,61208111  |
| AKIRIN2      | 333,9197468 | 445,7870506 | 369,8690325 | 200,1010827 | 245,1202011 | 261,9530329 | 254,6781751 | -0,70649666  | 0,189934551 | -3,719684781 | 0,000199472 | 0,005954666 | 1,631036664 |
| MYL9         | 2554,90697  | 2873,505933 | 2505,661678 | 1586,031966 | 1887,335761 | 1746,949578 | 1529,607685 | -0,604613427 | 0,162559814 | -3,719328971 | 0,000199753 | 0,005954666 | 1,520571259 |
| CPNE8        | 92,59959366 | 55,60037166 | 84,42662694 | 33,2475645  | 40,40442876 | 42,91380743 | 80,35159599 | -0,993908004 | 0,267439399 | -3,716385871 | 0,000202093 | 0,005959056 | 1,991572506 |
| EAF1         | 687,4818317 | 809,8956792 | 634,204781  | 364,4918183 | 457,0189831 | 423,7738484 | 507,3061681 | -0,778042538 | 0,209428185 | -3,715080366 | 0,000203139 | 0,005959056 | 1,714802633 |
| LPCAT2       | 138,8993905 | 141,2151032 | 154,7821494 | 67,11082465 | 93,37912425 | 96,55606673 | 199,7825823 | -0,766532184 | 0,206320277 | -3,715253746 | 0,000203    | 0,005959056 | 1,701175737 |
| TLE4         | 623,6442331 | 568,7967224 | 498,5191305 | 379,2685136 | 348,3759635 | 357,615062  | 443,3491811 | -0,64044295  | 0,172304617 | -3,716922735 | 0,000201664 | 0,005959056 | 1,558807686 |
| LYPD1        | 157,1387044 | 176,14985   | 140,7110449 | 100,3583892 | 88,88974327 | 101,9202927 | 172,0582849 | -0,708289264 | 0,190749983 | -3,713181274 | 0,00020467  | 0,005990324 | 1,633865543 |
| DPY30        | 1435,995214 | 2440,01985  | 1534,755468 | 967,2578488 | 1038,842757 | 1143,474161 | 1072,972144 | -0,781986474 | 0,210854376 | -3,708656609 | 0,000208362 | 0,006070776 | 1,719496852 |
| CBX5         | 1689,241072 | 1947,981163 | 1634,258279 | 1110,099237 | 1255,23092  | 1149,732424 | 3518,047135 | -0,585671238 | 0,157983321 | -3,707171339 | 0,000209587 | 0,006087157 | 1,507373707 |
| SYT1         | 74,36027976 | 61,01279722 | 64,3250491  | 32,63186887 | 20,65115248 | 25,03305434 | 23,16785015 | -1,336933706 | 0,360691021 | -3,706589929 | 0,000210069 | 0,006087157 | 2,526138441 |
| PMF1         | 425,8178284 | 490,5625712 | 510,5800772 | 309,0792108 | 343,8865826 | 297,7145391 | 561,9659686 | -0,585652956 | 0,15817675  | -3,702522382 | 0,000213467 | 0,006122543 | 1,500718053 |
| SNAP23       | 1452,831504 | 1557,794484 | 1207,09975  | 821,3379824 | 1011,008595 | 934,2693494 | 969,9649672 | -0,610313498 | 0,164793897 | -3,703495759 | 0,000212649 | 0,006122543 | 1,526590901 |
| SLMO2        | 3475,992323 | 4408,666638 | 3677,583667 | 2378,432253 | 2755,582041 | 2731,285036 | 2134,795156 | -0,556479459 | 0,150366593 | -3,700818442 | 0,000214905 | 0,006150109 | 1,470676013 |
| ZNF608       | 48,40433305 | 58,06056509 | 59,29965464 | 36,3260427  | 25,14053345 | 21,45690372 | 98,36467596 | -0,970248966 | 0,262376594 | -3,697924993 | 0,000217369 | 0,00618788  | 1,959178661 |
| EPC2         | 615,2260882 | 768,0723908 | 507,5648406 | 382,9626874 | 407,6357924 | 418,4096225 | 435,473026  | -0,649581754 | 0,176218135 | -3,686236687 | 0,000227595 | 0,006427554 | 1,568713351 |
| ID1          | 4500,199949 | 7491,781052 | 4710,804768 | 2901,773546 | 2417,980592 | 2936,019659 | 2617,29379  | -1,016750466 | 0,277404725 | -3,665224032 | 0,000247122 | 0,006920661 | 2,023356404 |
| TLK2         | 618,0321365 | 720,8366768 | 575,9102052 | 378,652818  | 460,6104879 | 384,4361916 | 476,2228762 | -0,648900976 | 0,177388819 | -3,658071467 | 0,00025412  | 0,00707254  | 1,567973281 |
| C19orf43     | 4952,675237 | 7221,651813 | 5011,323356 | 3444,8171   | 3738,756475 | 3430,422482 | 4200,76193  | -0,695574659 | 0,190244346 | -3,656217243 | 0,000255964 | 0,007104117 | 1,619529401 |
| ZEB2         | 235,0065445 | 448,2472441 | 202,0208573 | 129,2960842 | 119,4175339 | 160,9267779 | 175,3907193 | -1,117559159 | 0,305777973 | -3,654805964 | 0,000257377 | 0,007106658 | 2,169795623 |
| MNAT1        | 813,7540049 | 1033,773282 | 829,1900861 | 482,0896853 | 642,8793554 | 560,5616096 | 594,0003057 | -0,669902248 | 0,183465008 | -3,651389749 | 0,000260825 | 0,007177148 | 1,590965166 |
| CCDC103      | 150,8250957 | 141,7071419 | 163,8278594 | 70,80499848 | 62,85133363 | 115,3308575 | 97,57061848 | -0,876501888 | 0,240425112 | -3,645633687 | 0,000266734 | 0,007324087 | 1,835918337 |
| FBXW7        | 408,2800266 | 366,0767833 | 366,8537956 | 230,270169  | 275,6479918 | 272,6814847 | 313,7518349 | -0,555242804 | 0,152395604 | -3,643430573 | 0,000269028 | 0,007355723 | 1,469415914 |
| TNPO2        | 570,3293155 | 512,7043121 | 770,8955103 | 390,9667307 | 408,5336686 | 338,8402712 | 515,1623023 | -0,699985132 | 0,192408316 | -3,638019126 | 0,000274743 | 0,007480213 | 1,624488052 |

|           |             |             |             |             |             |             |             |               |             |              |             |             |             |
|-----------|-------------|-------------|-------------|-------------|-------------|-------------|-------------|---------------|-------------|--------------|-------------|-------------|-------------|
| IRF7      | 709,9302181 | 948,650589  | 711,5958557 | 380,4999049 | 377,1080018 | 478,3101454 | 408,6720144 | -0,940836551  | 0,258775871 | -3,63571978  | 0,000277206 | 0,007531335 | 1,919641026 |
| HSPH1     | 1556,65529  | 1666,042995 | 1504,603102 | 938,3201538 | 1074,757805 | 1252,546754 | 1711,37132  | -0,535244599  | 0,147339912 | -3,632719691 | 0,00028045  | 0,0075891   | 1,449187833 |
| SELK      | 544,3733688 | 867,4642056 | 649,2809644 | 376,8057311 | 480,367642  | 411,2573212 | 487,4736386 | -0,703568287  | 0,193809948 | -3,630196967 | 0,000283205 | 0,007645942 | 1,628527732 |
| C11orf70  | 121,3615887 | 125,4698652 | 110,5586781 | 65,87943337 | 64,64708602 | 46,48995805 | 44,53388412 | -1,011658123  | 0,27920157  | -3,623396971 | 0,000290759 | 0,00779847  | 2,016227066 |
| GDI1      | 2101,028659 | 1907,141952 | 2200,117695 | 1314,510189 | 1396,197483 | 1274,897696 | 1643,267986 | -0,63907924   | 0,177234867 | -3,605832475 | 0,000311154 | 0,008279006 | 1,557334917 |
| KLHL14    | 202,7369891 | 179,5941208 | 133,6754927 | 81,88751998 | 69,13646699 | 118,9070081 | 189,432994  | -0,941825321  | 0,261337755 | -3,603862446 | 0,000313523 | 0,008324844 | 1,920957128 |
| LURAP1L   | 324,0985778 | 592,4145794 | 342,7319022 | 194,5598219 | 228,0605534 | 213,6749995 | 163,5512821 | -0,988804133  | 0,274523234 | -3,601895985 | 0,000315905 | 0,008347628 | 1,984539301 |
| ANKRD13D  | 69,44969524 | 97,91569876 | 93,47233697 | 47,4085642  | 44,89380973 | 35,7615062  | 64,1220645  | -1,021354288  | 0,284038076 | -3,595835823 | 0,000323352 | 0,008480902 | 2,029823503 |
| ZNF485    | 86,285985   | 120,0574397 | 85,43170584 | 57,25969442 | 49,38319071 | 51,85418398 | 62,66707188 | -0,886385158  | 0,246866641 | -3,59054247  | 0,00032999  | 0,008619913 | 1,848538585 |
| TNIK      | 155,7356802 | 220,4333319 | 169,8583328 | 126,217606  | 113,1324005 | 92,97991611 | 230,5298362 | -0,717067276  | 0,199911338 | -3,586926509 | 0,000334599 | 0,008722592 | 1,643837029 |
| CLCN3     | 230,7974721 | 278,9859357 | 199,0056207 | 123,1391278 | 137,3750578 | 143,0460248 | 244,8390954 | -0,819547063  | 0,228830526 | -3,581458638 | 0,000341681 | 0,008853463 | 1,764851827 |
| FAM105A   | 239,215617  | 298,1754445 | 246,2443286 | 137,3001275 | 185,8603723 | 174,3373427 | 178,0935182 | -0,664722162  | 0,185713677 | -3,579284914 | 0,000344536 | 0,008891644 | 1,58526295  |
| PIM1      | 225,8868876 | 340,9828103 | 203,0259362 | 118,8292583 | 155,3325817 | 129,63546   | 145,3261613 | -0,938518121  | 0,26251461  | -3,575108152 | 0,000350083 | 0,008998744 | 1,916558614 |
| HP51      | 73,65876768 | 150,0717996 | 96,48757365 | 54,18121623 | 39,50655257 | 61,68859819 | 176,0391989 | -1,05032086   | 0,293954626 | -3,573071372 | 0,000352819 | 0,009050991 | 2,070990392 |
| ZBTB4     | 932,3095452 | 1407,230645 | 838,2357961 | 602,7660306 | 671,6113936 | 599,0052288 | 753,5990815 | -0,764427477  | 0,214419195 | -3,56510749  | 0,000363707 | 0,009274891 | 1,69869575  |
| ESRG      | 404,7724662 | 444,8029733 | 367,8588745 | 245,0468643 | 199,3285152 | 275,3635977 | 161,7470859 | -0,759690086  | 0,213245622 | -3,562511989 | 0,000367323 | 0,009348591 | 1,693126875 |
| SSFA2     | 1294,289775 | 1514,003041 | 1220,165775 | 959,2538055 | 912,2422138 | 846,6536592 | 910,396401  | -0,568204206  | 0,159612323 | -3,559901871 | 0,000370993 | 0,009404829 | 1,48267686  |
| SLC25A22  | 893,7263812 | 1009,663386 | 1006,083971 | 632,3194212 | 659,0411269 | 672,3163165 | 761,4635475 | -0,56751117   | 0,159645585 | -3,554819068 | 0,000378239 | 0,009550913 | 1,481964789 |
| PIK3CG    | 15,43326561 | 30,01435992 | 23,11681452 | 5,541260751 | 13,46814292 | 7,152301239 | 84,09545286 | -1,448547802  | 0,407671101 | -3,553226605 | 0,000380537 | 0,009582524 | 2,729331821 |
| PRTG      | 89,09203329 | 85,61473158 | 97,49265254 | 40,63591217 | 61,95345743 | 49,17207102 | 82,67457728 | -0,850342807  | 0,239336279 | -3,552920643 | 0,000380979 | 0,009582524 | 1,802929279 |
| C16orf55  | 178,1840666 | 179,5941208 | 160,8126228 | 67,11082465 | 87,09399088 | 92,97991611 | 149,8303544 | -1,074766845  | 0,302907102 | -3,548173151 | 0,000387913 | 0,009700088 | 2,10638163  |
| NHSL1     | 187,3037235 | 232,7342991 | 162,8227805 | 116,9821714 | 113,1324005 | 110,8606692 | 124,9799648 | -0,779209598  | 0,220049376 | -3,541067068 | 0,000398512 | 0,009907415 | 1,716190374 |
| ZMYM6     | 264,4700516 | 240,1148794 | 235,1884608 | 160,6965618 | 167,9028484 | 168,0790791 | 187,7069134 | -0,576793359  | 0,162934797 | -3,540025647 | 0,000400088 | 0,009927428 | 1,491530375 |
| PCDH82    | 153,631144  | 223,8776027 | 144,7313605 | 93,58573712 | 94,27700044 | 104,6024056 | 107,7195064 | -0,845545772  | 0,239378861 | -3,536681442 | 0,000405188 | 0,010034638 | 1,796944402 |
| SKAP2     | 460,19192   | 610,6200109 | 325,6455611 | 227,1916908 | 258,5883441 | 249,4365057 | 385,5547547 | -0,929619018  | 0,262909958 | -3,535883642 | 0,000406414 | 0,010045672 | 1,904772924 |
| RFC5      | 332,5167227 | 314,4127211 | 275,3916165 | 183,4773004 | 237,0393154 | 202,9465477 | 278,9949333 | -0,5719889238 | 0,162029576 | -3,530153279 | 0,000415319 | 0,010207019 | 1,486571896 |
| C10orf128 | 21,0453622  | 15,74523799 | 12,06094671 | 2,462782556 | 1,795752389 | 1,78807531  | 4,574846429 | -2,99769543   | 0,850332975 | -3,525319516 | 0,000422972 | 0,010335222 | 7,987230951 |
| KCTD3     | 759,7375752 | 686,8860074 | 780,9462992 | 515,9529455 | 548,602355  | 513,1776139 | 764,3253297 | -0,496509064  | 0,184060205 | -3,524835579 | 0,000423746 | 0,010335222 | 1,41079568  |
| KL        | 36,4786278  | 51,17202347 | 27,13713009 | 11,69821714 | 11,67239053 | 11,62248951 | 12,48173988 | -1,726876389  | 0,490318596 | -3,521947576 | 0,000428389 | 0,010428718 | 3,310103641 |
| ENPP4     | 141,0039267 | 185,9906238 | 118,5993093 | 96,66421532 | 79,01310513 | 81,35742659 | 119,7664467 | -0,79895672   | 0,227173926 | -3,516938468 | 0,000436555 | 0,010527187 | 1,73984251  |
| H1FO      | 1910,217375 | 1027,868818 | 1573,953545 | 762,8468967 | 984,0723094 | 823,4086801 | 753,1966944 | -0,811604331  | 0,230725525 | -3,517618309 | 0,000435438 | 0,010527187 | 1,755162164 |
| IRF9      | 377,4134954 | 246,5113823 | 278,4068531 | 127,4489973 | 163,4134674 | 216,3571125 | 183,9977295 | -0,835115499  | 0,237520879 | -3,515966689 | 0,000438156 | 0,010527187 | 1,783999857 |
| RNF146    | 125,5706611 | 158,4364573 | 134,6805716 | 81,88751998 | 79,01310513 | 85,82761487 | 162,6931738 | -0,767411522  | 0,218248927 | -3,516221288 | 0,000437736 | 0,010527187 | 1,702212938 |
| ENPP2     | 68,0466711  | 69,86949359 | 54,27426018 | 24,01212992 | 35,01717159 | 39,33765681 | 79,83363318 | -0,993627616  | 0,282980717 | -3,511290899 | 0,000445936 | 0,010654481 | 1,991185482 |
| LIN37     | 313,5758967 | 417,7408455 | 280,4170109 | 185,940083  | 208,3072772 | 185,0657946 | 228,7846005 | -0,808952626  | 0,230479083 | -3,509874366 | 0,000448318 | 0,010660567 | 1,751939101 |
| TIGD2     | 138,1978784 | 134,3265616 | 139,705966  | 73,88347668 | 77,21735274 | 91,1918408  | 86,26800744 | -0,769570012  | 0,219268137 | -3,50972113  | 0,000448577 | 0,010660567 | 1,704761612 |
| LRP12     | 206,2445495 | 229,2900283 | 200,0106995 | 144,0727795 | 121,2132863 | 134,9996859 | 237,9808009 | -0,667059178  | 0,190342562 | -3,504519277 | 0,000457432 | 0,010848647 | 1,587832992 |
| SLC39A7   | 1964,233805 | 2325,866875 | 1844,319767 | 1286,18819  | 1371,954825 | 1280,261922 | 1472,047746 | -0,639978952  | 0,182757355 | -3,501795871 | 0,000462134 | 0,010919919 | 1,558306425 |
| ZNF768    | 220,976303  | 299,6515605 | 235,1884608 | 134,2216493 | 152,6389531 | 185,9598322 | 180,9880826 | -0,685576158  | 0,195807206 | -3,501281542 | 0,000463026 | 0,010920978 | 1,608344165 |
| JUP       | 1157,494921 | 1568,619335 | 1011,109366 | 692,657938  | 774,867156  | 733,110877  | 770,9368899 | -0,765594328  | 0,219181323 | -3,492972471 | 0,000477676 | 0,011224935 | 1,700702029 |
| TOR1A     | 1353,216789 | 1466,767327 | 1316,653349 | 967,2578488 | 1070,268424 | 986,1235333 | 1155,57106  | -0,453401346  | 0,129821573 | -3,492496172 | 0,000478528 | 0,011224935 | 1,369264679 |
| OSCP1     | 125,5706611 | 134,8186003 | 107,5434415 | 61,5695639  | 87,09399088 | 58,11244757 | 69,078271   | -0,842036335  | 0,241256265 | -3,49021542  | 0,000482631 | 0,011268467 | 1,792578546 |
| BAMBI     | 77,86784012 | 95,94754401 | 82,41646916 | 41,86730345 | 46,68956212 | 50,96014633 | 61,9543257  | -0,887877088  | 0,254441109 | -3,489519016 | 0,000483891 | 0,011268614 | 1,850451199 |
| RABL5     | 605,4049191 | 691,8063943 | 598,0219409 | 336,7855145 | 384,2910113 | 387,1183046 | 444,3258128 | -0,775844286  | 0,222434494 | -3,487967503 | 0,000486707 | 0,011313747 | 1,712191758 |
| SMG6      | 352,8605728 | 408,3921104 | 316,599851  | 184,0929961 | 263,077725  | 218,1451878 | 303,0355691 | -0,702594535  | 0,20156961  | -3,485617377 | 0,000491003 | 0,011393033 | 1,627428922 |
| CCL5      | 108,7343713 | 91,02715714 | 81,41139027 | 38,78882526 | 52,97469549 | 42,91380743 | 34,65418724 | -1,070340187  | 0,308000147 | -3,475128818 | 0,000510608 | 0,011721232 | 2,099928471 |
| CHN2      | 34,37409159 | 33,95066942 | 38,1929979  | 13,54530406 | 11,67239053 | 8,940376549 | 11,72298584 | -1,624981929  | 0,467490661 | -3,475966615 | 0,000509016 | 0,011721232 | 3,084383017 |
| DCAF5     | 616,6291123 | 648,0149511 | 522,6410239 | 351,5622099 | 394,1676495 | 448,8069028 | 523,8525556 | -0,585449845  | 0,168454172 | -3,475425018 | 0,000510045 | 0,011721232 | 1,500506788 |
| GNAI1     | 122,7646128 | 159,9125734 | 99,50281033 | 62,80095518 | 74,52372416 | 80,46338894 | 141,1623042 | -0,828879161  | 0,238491588 | -3,475506908 | 0,000509889 | 0,011721232 | 1,776304803 |
| RBM10     | 830,5902946 | 1274,872239 | 909,5963974 | 480,858294  | 632,1048411 | 556,985459  | 679,9394422 | -0,854084644  | 0,245895618 | -3,473362607 | 0,00051398  | 0,011777651 | 1,807611505 |

|           |             |             |             |             |             |             |             |              |             |              |             |             |             |
|-----------|-------------|-------------|-------------|-------------|-------------|-------------|-------------|--------------|-------------|--------------|-------------|-------------|-------------|
| ZNF532    | 409,6830507 | 447,7552054 | 405,0467936 | 249,9724294 | 296,2991442 | 244,9663174 | 523,0799878 | -0,676137552 | 0,194718673 | -3,472381678 | 0,000515862 | 0,011786032 | 1,597856171 |
| ACPL2     | 669,9440299 | 678,029311  | 445,2499492 | 328,7814712 | 355,5589731 | 399,6348317 | 382,9074203 | -0,729944883 | 0,210328723 | -3,470495491 | 0,000519499 | 0,011840901 | 1,658575726 |
| LRCH2     | 199,2294288 | 154,5001478 | 139,705966  | 105,2893543 | 62,85133363 | 61,68859819 | 60,58427972 | -1,094812108 | 0,315540574 | -3,46963972  | 0,000521157 | 0,011857701 | 2,135852631 |
| NDNF      | 32,26955537 | 38,3790176  | 21,10665674 | 9,235434585 | 6,285133363 | 8,940376549 | 9,684681184 | -1,91072658  | 0,551959186 | -3,461717147 | 0,000536741 | 0,012126578 | 3,759984149 |
| CSRP2     | 157,8402165 | 312,4445664 | 186,9446739 | 101,5897804 | 130,1920482 | 111,7547069 | 205,13254   | -0,944077859 | 0,272807382 | -3,460602315 | 0,000538968 | 0,012137137 | 1,923958738 |
| DDB2      | 296,739607  | 391,1707564 | 370,8741112 | 201,9481696 | 248,7117059 | 160,9267779 | 423,9713577 | -0,792284825 | 0,229671525 | -3,449643251 | 0,000561328 | 0,012571791 | 1,731815003 |
| NR3C2     | 34,37409159 | 33,95066942 | 29,14728787 | 14,77669534 | 10,77451434 | 12,51652717 | 17,85987478 | -1,348767072 | 0,391448535 | -3,445579563 | 0,000569836 | 0,012718112 | 2,546943705 |
| SLC52A3   | 167,6613855 | 172,2135405 | 172,8735695 | 99,74269351 | 109,5408958 | 89,40376549 | 67,71316727 | -0,779462905 | 0,226525989 | -3,440942505 | 0,000579692 | 0,01286645  | 1,716491728 |
| SREBF1    | 437,0420216 | 321,3012628 | 433,1890025 | 214,2620824 | 263,9756012 | 269,1053341 | 339,4738532 | -0,672624621 | 0,195546115 | -3,439723775 | 0,000582308 | 0,012884819 | 1,593970159 |
| ABLIM1    | 25,95594671 | 40,83921104 | 31,15744566 | 12,92960842 | 17,0596477  | 16,09267779 | 141,1293622 | -1,121071949 | 0,326023942 | -3,438618469 | 0,000584691 | 0,012915345 | 2,175085254 |
| ULBP2     | 392,846761  | 719,3605607 | 518,6207084 | 326,3186887 | 307,0736586 | 286,0920496 | 262,0061816 | -0,827801519 | 0,241157821 | -3,432613193 | 0,000597794 | 0,013159649 | 1,774978463 |
| RARRES3   | 461,5949441 | 413,3124973 | 415,0975825 | 249,3567338 | 289,1161347 | 215,4630748 | 375,0073235 | -0,775068178 | 0,225856687 | -3,431681329 | 0,000599852 | 0,013182412 | 1,711270919 |
| TAB2      | 1995,801848 | 2055,737635 | 1658,380172 | 1172,284497 | 1171,728434 | 1373,241838 | 1586,588966 | -0,620076884 | 0,180814127 | -3,429360819 | 0,000605005 | 0,013272998 | 1,536957086 |
| ASCC1     | 32,97106744 | 32,96659204 | 43,21839236 | 19,08656481 | 19,75327628 | 8,940376549 | 45,44341639 | -1,159944267 | 0,338502833 | -3,426689977 | 0,000610986 | 0,013381429 | 2,234487953 |
| ARL6IP6   | 815,8585411 | 822,1966464 | 761,8498003 | 532,5767277 | 595,2919171 | 571,2900615 | 692,5284246 | -0,499883452 | 0,145906725 | -3,426048063 | 0,000612432 | 0,013390321 | 1,41409932  |
| DNAJC12   | 49,10584512 | 40,34717235 | 61,30981242 | 11,69821714 | 21,54902867 | 20,56286606 | 20,81844574 | -1,495902289 | 0,436781348 | -3,424830971 | 0,000615182 | 0,013409203 | 2,820404893 |
| TBC1D14   | 106,6298351 | 100,3758922 | 105,5332837 | 60,33817262 | 51,1789431  | 75,09916301 | 95,12577855 | -0,743877552 | 0,217231572 | -3,42435285  | 0,000616265 | 0,013409203 | 1,674670832 |
| ARL9      | 42,09072439 | 61,99687459 | 37,18791901 | 16,00808661 | 18,85540009 | 16,98671544 | 16,19574184 | -1,461552773 | 0,427124086 | -3,421845831 | 0,000621976 | 0,013431377 | 2,754046222 |
| C7orf29   | 14,03024146 | 10,82485112 | 15,07618338 | 1,847086917 | 6,285133363 | 1,78807531  | 33,31751385 | -2,049700509 | 0,598976839 | -3,422002947 | 0,000621616 | 0,013431377 | 4,140200138 |
| MX1       | 863,5613621 | 1017,043967 | 634,204781  | 392,198122  | 470,487126  | 559,667572  | 339,6340189 | -0,824966691 | 0,241010106 | -3,422954764 | 0,000619444 | 0,013431377 | 1,711494138 |
| METTL14   | 147,3175354 | 157,9444186 | 95,48249476 | 57,25969442 | 79,01310513 | 78,67531363 | 95,62564864 | -0,914818107 | 0,267915414 | -3,414578109 | 0,000638809 | 0,013597651 | 1,885331357 |
| PPP1R10   | 1373,560639 | 1962,250285 | 1351,83111  | 938,3201538 | 1087,328072 | 978,0771944 | 1027,030355 | -0,643585739 | 0,188550665 | -3,413330515 | 0,000641741 | 0,013637517 | 1,562207118 |
| HIST1H1A  | 794,1116668 | 816,2921821 | 798,0326404 | 418,6730345 | 566,5598788 | 539,1047059 | 1201,924371 | -0,661753194 | 0,19395879  | -3,411823682 | 0,000645298 | 0,013690531 | 1,582003941 |
| RRAD      | 7,116632805 | 6,396502934 | 9,04571003  | 1,847086917 | 0           | 0           | 10,14412822 | -3,320739768 | 0,973799218 | -3,410086706 | 0,000649422 | 0,013732776 | 9,991766536 |
| FAM221A   | 54,71794171 | 45,26755923 | 48,24378683 | 23,39643428 | 30,52779062 | 20,56286606 | 44,36144762 | -0,9952891   | 0,292156349 | -3,40670022  | 0,000657533 | 0,013846529 | 1,993479957 |
| C4orf52   | 1181,346331 | 1074,120454 | 1124,68328  | 601,5346393 | 833,2291087 | 736,6870276 | 871,9073061 | -0,639509246 | 0,187945299 | -3,402634964 | 0,000667394 | 0,013965924 | 1,557799161 |
| UBQLN2    | 1415,651364 | 1757,070152 | 1189,008329 | 726,520854  | 948,1572616 | 871,6867135 | 1143,64003  | -0,777943358 | 0,228606631 | -3,402978104 | 0,000666556 | 0,013965924 | 1,714684751 |
| KCTD18    | 263,7685395 | 222,4014866 | 199,0056207 | 136,0687362 | 106,8472672 | 138,5758365 | 190,4356499 | -0,844737641 | 0,248597639 | -3,39801152  | 0,000678776 | 0,014167378 | 1,795938118 |
| LEPREL4   | 601,8973588 | 680,4895044 | 605,0574931 | 394,6609046 | 460,6104879 | 354,932949  | 415,6195059 | -0,642353605 | 0,189079918 | -3,397259802 | 0,000680643 | 0,014171801 | 1,560873484 |
| KIF13A    | 308,6653122 | 242,5750728 | 315,5947721 | 163,1593443 | 180,4731151 | 171,6552297 | 198,0958478 | -0,74845209  | 0,220416449 | -3,395627196 | 0,000684716 | 0,014222204 | 1,679989353 |
| PIAS3     | 411,787587  | 363,6165899 | 345,7471389 | 230,270169  | 284,6267537 | 238,7080539 | 494,2536737 | -0,576269976 | 0,170309313 | -3,383666844 | 0,000715247 | 0,01478484  | 1,490989374 |
| ZSCAN21   | 58,22550207 | 79,21822864 | 51,2590235  | 30,78478195 | 36,81292398 | 25,92709199 | 40,95889711 | -1,027581124 | 0,304154722 | -3,378481577 | 0,000728873 | 0,015018286 | 2,038603387 |
| PRR3      | 244,8277135 | 152,0399544 | 212,0716463 | 109,5938237 | 139,1708102 | 109,9666316 | 212,652459  | -0,761373038 | 0,225583434 | -3,375128334 | 0,000737813 | 0,015168261 | 1,695103117 |
| CCDC23    | 362,6817418 | 601,7633145 | 377,9096635 | 243,815473  | 274,7501156 | 243,1782421 | 273,8881535 | -0,820928167 | 0,244167938 | -3,36214564  | 0,000773393 | 0,015684658 | 1,766542144 |
| KIAA2013  | 1302,006408 | 2018,834734 | 1345,800637 | 897,6842416 | 891,5910613 | 860,9582617 | 905,2523417 | -0,816961997 | 0,243212713 | -3,35904314  | 0,000782129 | 0,015836874 | 1,761692341 |
| VEGFA     | 1579,103677 | 2149,717025 | 1476,460893 | 1075,004586 | 1240,864901 | 985,2294957 | 1153,31473  | -0,658095059 | 0,196244042 | -3,353452434 | 0,000798101 | 0,016109637 | 1,577997652 |
| UBA7      | 423,7132922 | 464,9765594 | 411,0772669 | 221,65043   | 285,5246299 | 245,8603551 | 289,2521098 | -0,789903259 | 0,235841026 | -3,349303857 | 0,000810149 | 0,016225658 | 1,728958523 |
| HSPB1     | 2759,748496 | 3463,460319 | 2888,596736 | 2375,353775 | 2173,758267 | 2227,047798 | 3428,342166 | -0,427606998 | 0,127692615 | -3,34872145  | 0,000811854 | 0,016234553 | 1,34500077  |
| FPR1      | 51,21038134 | 46,74367529 | 34,17268233 | 21,54934736 | 14,36601911 | 24,13901668 | 48,80486119 | -1,14320502  | 0,341545405 | -3,347153863 | 0,000816459 | 0,016276094 | 2,20871155  |
| FTX       | 122,0631007 | 174,673734  | 142,7212027 | 88,66017201 | 92,48124805 | 91,1918468  | 142,4317756 | -0,697008942 | 0,208344229 | -3,345467955 | 0,000821439 | 0,016282192 | 1,621140287 |
| CASP9     | 519,1189341 | 635,7139839 | 497,5140516 | 313,3890802 | 326,8269349 | 323,6416311 | 326,8926891 | -0,779283723 | 0,233007083 | -3,344463659 | 0,000824418 | 0,016358796 | 1,716278554 |
| VEGFC     | 877,5916035 | 1021,964353 | 824,1646916 | 662,4885075 | 624,9218315 | 617,7800195 | 575,4895327 | -0,516804467 | 0,154689298 | -3,340919339 | 0,000835015 | 0,016518157 | 1,430782588 |
| GTF2IRD1  | 400,5633938 | 482,6899522 | 381,929979  | 269,6746899 | 290,0140109 | 261,9530329 | 394,9888116 | -0,625783179 | 0,187625718 | -3,335273997 | 0,000852154 | 0,016805571 | 1,543048255 |
| ARL6IP5   | 536,656736  | 777,9131645 | 515,0654717 | 347,868036  | 395,0655257 | 320,9595181 | 957,7365284 | -0,784906845 | 0,235798459 | -3,32871914  | 0,000872463 | 0,017023611 | 1,722981063 |
| DGAT2     | 313,5758967 | 424,1373484 | 252,2748019 | 189,6342568 | 198,430639  | 170,7611921 | 166,4541059 | -0,829095371 | 0,249146757 | -3,32773896  | 0,000875539 | 0,017057771 | 1,77657103  |
| C10orf118 | 396,3543213 | 543,2107107 | 286,4474843 | 206,2580391 | 248,7117059 | 223,5094137 | 299,1952186 | -0,858656002 | 0,258143371 | -3,326275619 | 0,000880149 | 0,017095856 | 1,813348229 |
| KLF11     | 215,3642065 | 213,5447903 | 214,081804  | 128,6803885 | 154,4347055 | 115,3308575 | 363,6388668 | -0,691435016 | 0,207854247 | -3,326537829 | 0,000879321 | 0,017095856 | 1,614889013 |
| FAM117A   | 264,4700516 | 248,4795371 | 262,3255909 | 159,4651705 | 184,9624961 | 160,0327402 | 161,5952757 | -0,620632587 | 0,186646654 | -3,325173925 | 0,000883634 | 0,017114608 | 1,537549212 |
| FXR2      | 2157,149625 | 2689,975503 | 1847,335004 | 1139,652628 | 1352,201549 | 1462,645603 | 1585,514329 | -0,760384669 | 0,22867815  | -3,325130404 | 0,000883772 | 0,017114608 | 1,693942224 |
| NEK10     | 16,13477768 | 21,15766355 | 12,06094671 | 4,925565112 | 3,591504779 | 1,78807531  | 7,974497362 | -2,23564302  | 0,673449352 | -3,319689912 | 0,000901175 | 0,017399295 | 4,70972564  |

|              |             |             |             |             |             |              |              |              |             |              |             |             |             |
|--------------|-------------|-------------|-------------|-------------|-------------|--------------|--------------|--------------|-------------|--------------|-------------|-------------|-------------|
| C2orf13      | 965,2806127 | 977,6808715 | 836,2256383 | 583,6794657 | 689,5689175 | 580,230438   | 967,0251939  | -0,585928883 | 0,176594742 | -3,317929385 | 0,000906874 | 0,01743366  | 1,501005104 |
| SHPRH        | 182,393139  | 241,0989567 | 182,9243584 | 116,9821714 | 128,3962958 | 128,7414223  | 166,2073451  | -0,704153791 | 0,212215235 | -3,318111402 | 0,000906283 | 0,01743366  | 1,629188788 |
| USP31        | 425,8178284 | 571,7489546 | 380,9249001 | 278,2944288 | 273,8522394 | 425,84893298 | 425,84890208 | -0,670587021 | 0,202167389 | -3,316989069 | 0,000909932 | 0,017463638 | 1,591720494 |
| BTBD3        | 618,7336485 | 900,9228363 | 607,0676509 | 461,7717292 | 485,7510213 | 449,7009404  | 458,4855798  | -0,609012214 | 0,183817047 | -3,313143279 | 0,000922537 | 0,017652945 | 1,525214565 |
| FIBIN        | 54,71794171 | 45,26755923 | 49,24886572 | 23,39643428 | 20,65115248 | 16,98671544  | 17,96572248  | -1,279692121 | 0,386305667 | -3,312641339 | 0,000924194 | 0,017658416 | 2,427871593 |
| GZF1         | 286,9184379 | 446,771128  | 275,3916165 | 205,0266478 | 198,430639  | 147,5162131  | 219,8916174  | -0,874930187 | 0,264300748 | -3,310358352 | 0,000931766 | 0,017776715 | 1,83391934  |
| PRKRA        | 434,9374854 | 615,5403977 | 412,0823458 | 267,827603  | 302,5842776 | 244,9663174  | 536,9741828  | -0,845285832 | 0,255856652 | -3,303747729 | 0,000954016 | 0,018120683 | 1,796620664 |
| AFAP1        | 755,5285028 | 791,6902478 | 649,2809644 | 481,4739897 | 562,0704979 | 546,2570071  | 435,9527459  | -0,47027351  | 0,142473028 | -3,300789738 | 0,000964131 | 0,018228859 | 1,385372085 |
| CACNB3       | 596,2852622 | 751,3430754 | 575,9102052 | 309,0792108 | 365,4356112 | 364,7673632  | 560,2391052  | -0,889940571 | 0,269615646 | -3,300774957 | 0,000964182 | 0,018228859 | 1,853099787 |
| PTPN23       | 663,6304212 | 790,2141317 | 561,8391007 | 424,2142953 | 450,7338497 | 413,0453966  | 643,8029555  | -0,648524102 | 0,196957424 | -3,292712146 | 0,00099226  | 0,018681762 | 1,567563735 |
| GJC1         | 206,2445495 | 176,14985   | 186,9446739 | 94,20143276 | 130,1920482 | 124,271234   | 301,9683853  | -0,71295983  | 0,216678938 | -3,290397471 | 0,00100046  | 0,018781222 | 1,639163574 |
| ZNF786       | 43,49374854 | 63,96502934 | 33,16760344 | 27,0960811  | 9,876638142 | 21,45690372  | 47,12476496  | -1,261621391 | 0,383742396 | -3,287677893 | 0,001010173 | 0,01890845  | 2,397650525 |
| SEC22B       | 1335,678987 | 1462,338978 | 1152,825489 | 848,4285905 | 990,3574427 | 985,2294957  | 1130,13509   | -0,486718311 | 0,148193666 | -3,284339499 | 0,001022217 | 0,019078422 | 1,401253825 |
| B3GNT2       | 101,7192506 | 109,2325886 | 102,518047  | 68,34221593 | 56,56620027 | 75,09916301  | 115,5842523  | -0,649231959 | 0,197979591 | -3,279287299 | 0,001040696 | 0,01933923  | 1,568333048 |
| CLDN16       | 41,38921232 | 36,90290154 | 45,22855015 | 13,54530406 | 28,73203823 | 25,03305434  | 2564,802115  | -0,90378619  | 0,275790182 | -3,277078907 | 0,001048871 | 0,019435043 | 1,870969694 |
| PDE4B        | 733,7816285 | 756,755501  | 568,7364653 | 471,6228595 | 425,5933163 | 450,5949781  | 290,4440833  | -0,613074361 | 0,187187975 | -3,27518027  | 0,001055946 | 0,019538029 | 1,529515112 |
| UBE2D4       | 126,2721732 | 242,5750728 | 145,7364394 | 92,35434585 | 97,86850522 | 92,97991611  | 169,3023497  | -0,869813249 | 0,265681609 | -3,273893341 | 0,001060766 | 0,019599067 | 1,827426333 |
| MLLT11       | 138,8993905 | 110,7087046 | 160,8126228 | 65,26373773 | 96,07275283 | 74,20512536  | 662,4967733  | -0,79966596  | 0,244437259 | -3,271456909 | 0,001069949 | 0,019684003 | 1,74069804  |
| NDUFB5       | 2260,973412 | 3381,289859 | 2160,919618 | 1413,021491 | 1746,369199 | 1742,479389  | 1829,539859  | -0,671794568 | 0,205326521 | -3,271835349 | 0,001068518 | 0,019684003 | 1,593053334 |
| CNP          | 2188,016156 | 2523,666427 | 1998,096838 | 1248,630756 | 1485,087226 | 1452,811189  | 1566,998002  | -0,681244921 | 0,208283179 | -3,270763021 | 0,001072577 | 0,019704212 | 1,60352286  |
| SRRM2        | 6690,320642 | 7977,915275 | 4850,510734 | 3682,475617 | 4338,537773 | 4128,66589   | 5693,142054  | -0,684330285 | 0,20932735  | -3,269187166 | 0,001078569 | 0,019786062 | 1,606955842 |
| GPD2         | 284,8139017 | 432,9940448 | 294,4881154 | 165,6221269 | 187,6561247 | 217,2511501  | 448,6263141  | -0,832228225 | 0,254952498 | -3,264248164 | 0,00109755  | 0,02002018  | 1,780433097 |
| FUNDCl       | 241,3201532 | 241,5909954 | 279,411932  | 163,1593443 | 183,1667437 | 148,4102507  | 160,0198865  | -0,621101214 | 0,190315258 | -3,263538724 | 0,001100301 | 0,020041983 | 1,538048732 |
| GATA3        | 121,3615887 | 104,3122017 | 145,7364394 | 72,6520854  | 45,79168593 | 45,5959204   | 62,01065726  | -1,166670069 | 0,357643636 | -3,262102137 | 0,001105893 | 0,02011538  | 2,24052939  |
| GLT8D2       | 24,55292256 | 26,57008911 | 22,11173563 | 10,46682586 | 10,77451434 | 13,41056482  | 51,31214368  | -1,105053086 | 0,339011012 | -3,25963773  | 0,001115546 | 0,020233805 | 2,151067931 |
| RAB3GAP1     | 690,28788   | 1081,993073 | 666,3673055 | 443,9165557 | 531,5427073 | 529,2702917  | 685,1927209  | -0,699737169 | 0,214641806 | -3,260022743 | 0,001114033 | 0,020233805 | 1,624208867 |
| TOM1L2       | 641,883547  | 577,1613801 | 596,0117831 | 437,7595993 | 447,142345  | 465,7936182  | 454,182599   | -0,42660036  | 0,131255371 | -3,250155452 | 0,001153419 | 0,020774455 | 1,344062624 |
| ABAT         | 160,6462648 | 197,3075136 | 119,6043882 | 67,11082465 | 80,80885752 | 105,4964433  | 72,17388386  | -0,926271477 | 0,285497258 | -3,244414611 | 0,001138693 | 0,020113865 | 1,900358329 |
| LOC100289341 | 75,06179183 | 58,55260378 | 64,3250491  | 30,78478195 | 32,32354301 | 37,54958151  | 44,72917072  | -0,978109885 | 0,30182432  | -3,240659615 | 0,001192535 | 0,021389226 | 1,96988292  |
| RPSAP52      | 63,13608659 | 59,53668116 | 55,27933907 | 32,01617323 | 25,14053345 | 33,07939323  | 41,82102829  | -0,978271682 | 0,3021952   | -3,237217808 | 0,001207012 | 0,02158876  | 1,970103852 |
| FAM115A      | 173,2734821 | 150,5638383 | 200,0106995 | 121,2920409 | 103,2557624 | 114,4368198  | 193,2697401  | -0,616544149 | 0,1906533   | -3,233849872 | 0,001221336 | 0,021765701 | 1,533198136 |
| DCLK1        | 0,701512073 | 4,428348185 | 3,015236677 | 0           | 0           | 0            | 10,06079864  | -4,280634657 | 1,324875335 | -3,230971657 | 0,001233702 | 0,021944214 | 19,43566623 |
| ARHGAP35     | 1562,968899 | 2050,32521  | 1544,806257 | 1159,354888 | 1194,175339 | 1282,049997  | 1403,842386  | -0,506055091 | 0,156717512 | -3,2290909   | 0,001241844 | 0,022058578 | 1,420161588 |
| SLC25A4      | 852,3371689 | 1023,932508 | 811,098666  | 479,6269028 | 564,7641265 | 487,2505219  | 826,1691485  | -0,81216676  | 0,251569733 | -3,228396162 | 0,001244864 | 0,022081769 | 1,75584654  |
| CLCF1        | 115,7494921 | 132,3584069 | 139,705966  | 84,35030254 | 87,99186708 | 73,3110877   | 118,2221646  | -0,654841921 | 0,203194453 | -3,222735219 | 0,001269729 | 0,022399405 | 1,574443429 |
| C10orf88     | 168,3628976 | 209,6084808 | 158,802465  | 119,444954  | 115,8260291 | 108,1785562  | 120,2820088  | -0,649280853 | 0,201552151 | -3,221403749 | 0,001275643 | 0,022469697 | 1,5683862   |
| HMG20B       | 535,2537118 | 715,4242512 | 598,0219409 | 413,1317738 | 390,5761447 | 442,5486392  | 677,0195038  | -0,570490282 | 0,177112946 | -3,221053545 | 0,001277203 | 0,022469697 | 1,485028153 |
| C17orf75     | 294,6350707 | 475,8014106 | 357,8080856 | 222,2661257 | 255,8947155 | 184,1717569  | 234,1146195  | -0,770625287 | 0,239402542 | -3,218951977 | 0,0012866   | 0,022604146 | 1,706009034 |
| MAZ          | 4966,705478 | 5947,271613 | 4743,972371 | 3032,916718 | 3674,109389 | 3179,197901  | 4118,839145  | -0,663682724 | 0,206256978 | -3,217746765 | 0,001292018 | 0,022668409 | 1,584121205 |
| SLC35A2      | 528,9401032 | 697,7108585 | 464,3464482 | 380,4999049 | 367,2313636 | 363,8733255  | 342,1469616  | -0,608320458 | 0,189157445 | -3,215947744 | 0,001300145 | 0,022687355 | 1,524483418 |
| SRA1         | 1354,619813 | 2133,971787 | 1637,273515 | 1113,793411 | 1083,736567 | 1045,130019  | 1212,743818  | -0,661098462 | 0,205552386 | -3,21620427  | 0,001298983 | 0,022687355 | 1,58128615  |
| TIFA         | 382,3240799 | 519,100815  | 354,7928489 | 210,5679085 | 272,056487  | 266,4232212  | 465,8074706  | -0,750968627 | 0,233490372 | -3,216272345 | 0,001298675 | 0,022687355 | 1,682922367 |
| TYMP         | 186,6022115 | 199,767707  | 153,7770705 | 108,3624325 | 98,76638142 | 112,6487445  | 71,66037895  | -0,760339834 | 0,236398664 | -3,21634573  | 0,001298343 | 0,022687355 | 1,693889582 |
| PLXDC2       | 27,35897085 | 36,90290154 | 28,14220898 | 16,00808661 | 12,57026673 | 13,41056482  | 141,9216194  | -1,138893461 | 0,354378281 | -3,213778958 | 0,001310005 | 0,022797624 | 2,20212057  |
| SYTL4        | 78,5693522  | 119,565401  | 84,42662694 | 47,4085642  | 59,25982885 | 46,48995805  | 72,0498624   | -0,895445851 | 0,279964202 | -3,198429816 | 0,001381782 | 0,023949642 | 1,860184669 |
| CH25H        | 41,38921232 | 25,09397305 | 41,20823458 | 12,92960842 | 13,46814292 | 8,940376549  | 11,91912899  | -1,592558566 | 0,498179893 | -3,196754    | 0,001389834 | 0,024056831 | 3,015837229 |
| IL4I1        | 813,7540049 | 1464,307133 | 720,6415657 | 474,7013376 | 518,9724405 | 463,1115052  | 399,2861764  | -1,042782465 | 0,326294212 | -3,195835003 | 0,001394268 | 0,024098646 | 2,060197239 |
| RAB4B        | 185,1991873 | 290,7948642 | 182,9243584 | 149,0474483 | 157,1936101 | 124,271234   | 157,1936101  | -0,773797084 | 0,242295083 | -3,193614468 | 0,001405036 | 0,024194838 | 1,70976386  |
| IFT43        | 544,3733688 | 1009,171348 | 670,3876211 | 388,5039482 | 413,9209257 | 399,6348317  | 508,4137495  | -0,889015627 | 0,278637076 | -3,19058626  | 0,001419844 | 0,024379676 | 1,851912105 |
| UBTF         | 1236,765785 | 1578,952147 | 1205,089592 | 951,2497622 | 976,8892998 | 936,0574247  | 1101,083552  | -0,490827425 | 0,153922537 | -3,188795055 | 0,001428671 | 0,024433504 | 1,405250595 |

|          |              |             |             |             |             |             |             |              |              |              |             |             |             |
|----------|--------------|-------------|-------------|-------------|-------------|-------------|-------------|--------------|--------------|--------------|-------------|-------------|-------------|
| CYTIP    | 26,65745878  | 9,348735057 | 10,05078892 | 0,615695639 | 2,693628584 | 1,78807531  | 4,262865191 | -3,235804387 | 1,016136672  | -3,184418472 | 0,001450452 | 0,024740286 | 9,420504918 |
| KIF20B   | 401,2649059  | 446,2790893 | 338,7115867 | 272,7531681 | 263,9756012 | 268,2112965 | 359,212693  | -0,562960991 | 0,176816819  | -3,183865618 | 0,001453225 | 0,024754797 | 1,477298118 |
| PQLC2    | 742,1997734  | 897,4785655 | 707,5755401 | 402,0492523 | 503,7085452 | 517,6478022 | 515,1696745 | -0,723782422 | 0,227362707  | -3,183382328 | 0,001455653 | 0,024763402 | 1,651506242 |
| CSRNP2   | 137,4963663  | 154,9921865 | 120,6094671 | 73,26778104 | 99,66425761 | 70,62897474 | 88,40122696 | -0,771523861 | 0,242540075  | -3,181016005 | 0,001467595 | 0,02493363  | 1,707071943 |
| KEAP1    | 741,4982613  | 1230,096718 | 796,0224826 | 564,5929009 | 600,6791742 | 484,5684089 | 712,6050718 | -0,747631899 | 0,23543962   | -3,175471906 | 0,00149593  | 0,025348141 | 1,679034529 |
| TNFSF9   | 107,3313472  | 102,8360856 | 95,48249476 | 63,41665081 | 48,48531451 | 69,73493708 | 109,030652  | -0,750714058 | 0,236620278  | -3,172653102 | 0,001510529 | 0,025494877 | 1,682625435 |
| RERE     | 363,3832539  | 470,388985  | 337,7065078 | 230,270169  | 254,9968393 | 269,1053341 | 167,1120576 | -0,640096098 | 0,201788846  | -3,172108417 | 0,001513365 | 0,025509312 | 1,558432963 |
| DNAJB2   | 237,1110807  | 210,5925581 | 286,4474843 | 140,9943013 | 159,8219627 | 151,9864013 | 144,4203661 | -0,694124202 | 0,218884771  | -3,171185461 | 0,001518182 | 0,025557053 | 1,617901976 |
| SOC57    | 311,4713605  | 617,0165138 | 307,554141  | 249,3567338 | 183,1667437 | 208,3107736 | 223,1027848 | -0,949398944 | 0,299445261  | -3,170525864 | 0,001521633 | 0,025581708 | 1,931067968 |
| ZNF688   | 115,04798    | 115,6290915 | 106,5383626 | 69,5736072  | 63,74920982 | 68,84089943 | 88,84652925 | -0,739014465 | 0,233606016  | -3,16350785  | 0,001558801 | 0,026172419 | 1,669035297 |
| POGK     | 739,3937251  | 1273,396123 | 762,8548792 | 532,5767277 | 609,6579362 | 545,3629695 | 918,2230955 | -0,720050372 | 0,227706283  | -3,162189302 | 0,001565877 | 0,02625699  | 1,647239548 |
| DTX3     | 224,4838634  | 279,4779743 | 229,1579874 | 170,547692  | 148,1495721 | 151,0923637 | 184,634408  | -0,642880367 | 0,203602973  | -3,157519551 | 0,001591176 | 0,02657738  | 1,56144435  |
| ULK2     | 48,40433305  | 67,40930015 | 35,17776123 | 27,70630375 | 24,24265726 | 25,03305434 | 62,08439043 | -0,990387606 | 0,313931693  | -3,15478694  | 0,001606154 | 0,02668909  | 1,986718687 |
| DUSP18   | 186,6022115  | 171,2294632 | 171,8684906 | 126,8333016 | 115,8260291 | 118,9070081 | 190,9102297 | -0,548388767 | 0,173857344  | -3,154245634 | 0,001609136 | 0,026692635 | 1,462451486 |
| NKAP     | 312,1728726  | 454,643747  | 319,6150877 | 195,7912132 | 226,2648011 | 277,151673  | 233,2588252 | -0,642898752 | 0,203864332  | -3,153561718 | 0,001612911 | 0,026698034 | 1,561463398 |
| IP6K2    | 453,1767993  | 674,5850402 | 362,8334801 | 283,2199939 | 272,056487  | 303,0798765 | 320,2129429 | -0,7996418   | 0,253843427  | -3,150137905 | 0,001631934 | 0,026909152 | 1,740668891 |
| SMAD4    | 651,704716   | 591,4305021 | 611,0879665 | 380,4999049 | 476,7722594 | 464,8995805 | 506,4865177 | -0,490025515 | 0,15560205   | -3,149222755 | 0,001637054 | 0,026959049 | 1,404469715 |
| BBS1     | 317,7849691  | 375,917557  | 368,8639534 | 241,9683861 | 225,3669249 | 239,6020915 | 226,4294264 | -0,58734321  | 0,186684646  | -3,146178446 | 0,00165419  | 0,027206468 | 1,502477316 |
| ACP6     | 280,6048293  | 368,5369767 | 242,224013  | 161,3122574 | 192,1455057 | 159,1387026 | 212,1097449 | -0,802875999 | 0,255575011  | -3,141449528 | 0,001681138 | 0,027544138 | 1,744575457 |
| TNFAIP6  | 219,19636951 | 67,40930015 | 66,33520688 | 26,47491248 | 43,09805734 | 43,80784509 | 38,29360183 | -1,003466837 | 0,2139606774 | -3,139692015 | 0,001691255 | 0,027674697 | 2,004811836 |
| EIF1B    | 1424,771021  | 1875,159437 | 1341,780321 | 830,573417  | 1037,047005 | 1043,341943 | 1317,578308 | -0,674545165 | 0,215694485  | -3,12731763  | 0,001764092 | 0,028684318 | 1,596093497 |
| TUBG2    | 365,4877901  | 442,3427798 | 359,8182434 | 281,9886027 | 272,056487  | 275,3635977 | 216,8311589 | -0,496533739 | 0,158754269  | -3,127687475 | 0,001761874 | 0,028684318 | 1,41081981  |
| GUCY1B3  | 147,3175354  | 150,5638383 | 123,6247037 | 88,66017201 | 51,1789431  | 98,34414204 | 117,8163018 | -0,823148877 | 0,263260515  | -3,126746433 | 0,001767523 | 0,028698354 | 1,769263438 |
| FKRP     | 312,8743846  | 210,1005194 | 315,5947721 | 188,4028655 | 190,3497533 | 167,1850415 | 186,2471336 | -0,612356026 | 0,195994391  | -3,124354845 | 0,001781954 | 0,028796684 | 1,528753738 |
| KRT222   | 21,74687427  | 21,15766355 | 20,10157784 | 11,69821714 | 10,77451434 | 2,682112965 | 29,35400016 | -1,285536568 | 0,411549147  | -3,123652615 | 0,001786212 | 0,028796684 | 2,437726999 |
| SDE2     | 854,4417051  | 1250,762343 | 882,4592673 | 608,9229869 | 736,2584796 | 600,7933041 | 691,2012422 | -0,620493783 | 0,19861779   | -3,124059444 | 0,001783744 | 0,028796684 | 1,537401288 |
| TMEM150A | 112,2419317  | 102,3440469 | 119,6043882 | 80,65612871 | 55,66832407 | 62,58263584 | 73,60821921 | -0,733380673 | 0,234835777  | -3,1229512   | 0,001790474 | 0,028796684 | 1,662530345 |
| COQ9     | 326,203114   | 363,1245512 | 374,8944268 | 230,8858646 | 235,243563  | 296,8205014 | 317,5719935 | -0,481972926 | 0,154799297  | -3,11353434  | 0,00184861  | 0,029609949 | 1,662530345 |
| ACTR10   | 867,7704345  | 972,268446  | 874,4186362 | 524,5726844 | 721,8924605 | 680,3626554 | 784,734497  | -0,497283122 | 0,159816001  | -3,111597829 | 0,001860778 | 0,02972275  | 1,411552827 |
| ZNF836   | 138,1978784  | 142,6912193 | 144,7313605 | 78,80904179 | 80,80885752 | 94,76799142 | 91,24589    | -0,744762757 | 0,239567837  | -3,108776064 | 0,00187864  | 0,029859857 | 1,675698687 |
| MTR      | 360,5772056  | 518,1167377 | 397,0061624 | 274,600255  | 255,8947155 | 293,2443508 | 394,387148  | -0,6335643   | 0,204064696  | -3,104722737 | 0,001904575 | 0,030073035 | 1,55139311  |
| PKP4     | 249,738298   | 356,2360096 | 242,224013  | 144,6884752 | 210,1030296 | 163,6088908 | 219,5526729 | -0,718058063 | 0,231433704  | -3,102651213 | 0,001917955 | 0,03023186  | 1,64496634  |
| CDIPT    | 1359,530398  | 1547,95371  | 1294,541613 | 861,3581989 | 950,8508902 | 865,4284499 | 977,3406608 | -0,650782604 | 0,209963011  | -3,099510726 | 0,001938406 | 0,030516855 | 1,570019638 |
| TM7SF2   | 190,8112839  | 81,67842208 | 163,8278594 | 86,19738946 | 55,66832407 | 65,26474881 | 91,99560349 | -1,063925185 | 0,343458029  | -3,097686166 | 0,001950379 | 0,030630457 | 2,090611784 |
| CXCR5    | 77,16632805  | 84,13861552 | 63,31997021 | 33,86326014 | 35,01717159 | 43,80784509 | 28,10943255 | -1,006104678 | 0,324926416  | -3,096407763 | 0,001958808 | 0,03072537  | 2,008480811 |
| IFT52    | 737,2891889  | 1287,173206 | 784,9666148 | 429,1398604 | 568,3556312 | 500,6610867 | 539,5583715 | -0,908752876 | 0,294557952  | -3,085141211 | 0,002034555 | 0,031643683 | 1,877421877 |
| BBS2     | 494,5660116  | 831,0533427 | 486,4581838 | 306,6164282 | 342,0908302 | 383,5421539 | 432,355575  | -0,814889234 | 0,264460196  | -3,081330368 | 0,002060779 | 0,031897484 | 1,759163084 |
| SLC43A2  | 186,6022115  | 305,0639861 | 220,1122774 | 112,0566063 | 176,8816104 | 104,6024056 | 127,6882266 | -0,860667076 | 0,279304292  | -3,081467425 | 0,00205983  | 0,031897484 | 1,815877746 |
| C2orf47  | 403,3694421  | 716,4083286 | 420,1229769 | 296,765298  | 324,1333063 | 313,8072169 | 405,2392926 | -0,724062863 | 0,235041828  | -3,080570249 | 0,002066046 | 0,031940626 | 1,651827304 |
| MOSPD2   | 430,7284129  | 316,8729146 | 393,9909257 | 224,1132126 | 310,6651634 | 214,5697032 | 298,6782555 | -0,607204269 | 0,197255703  | -3,078259637 | 0,002082134 | 0,032112245 | 1,523304406 |
| GBA2     | 127,6751973  | 132,3584069 | 96,48757365 | 79,42473743 | 75,42160035 | 51,85418398 | 128,042022  | -0,787607062 | 0,256068876  | -3,07576256  | 0,00209965  | 0,032266455 | 1,726208896 |
| HYDIN    | 101,0177385  | 97,42366007 | 118,5993093 | 60,95386826 | 53,87257168 | 67,05282412 | 44,38518299 | -0,796065695 | 0,258792354  | -3,07607888  | 0,002097424 | 0,032266455 | 1,736359521 |
| SRPR     | 4126,995526  | 1960,774169 | 4097,706643 | 1741,187267 | 1974,429752 | 1699,565582 | 2247,912981 | -0,911135544 | 0,296394845  | -3,074060025 | 0,002111669 | 0,032373903 | 1,880525076 |
| TGFB3    | 25,25443463  | 14,26912193 | 21,10665674 | 6,15695639  | 10,77451434 | 1,78807531  | 14,83770714 | -1,686287749 | 0,548522339  | -3,074237144 | 0,002110416 | 0,032373903 | 3,218275312 |
| GSK3A    | 1932,665762  | 2568,441947 | 1858,390872 | 1258,481886 | 1391,708102 | 1247,182529 | 1495,625133 | -0,706986469 | 0,230059347  | -3,073061275 | 0,00211875  | 0,032443828 | 1,632390782 |
| DEM1     | 348,6515004  | 343,9350424 | 406,0518724 | 208,7208216 | 276,545868  | 213,6749995 | 181,0540422 | -0,652464031 | 0,212574193  | -3,069347326 | 0,00214527  | 0,032771993 | 1,571850525 |
| WASL     | 519,8204462  | 466,4526755 | 472,3870793 | 315,8518628 | 394,1676495 | 365,6614008 | 529,099789  | -0,442346743 | 0,144195785  | -3,067681513 | 0,002157264 | 0,032877214 | 1,358812828 |
| SLC16A5  | 58,92701415  | 54,1242556  | 53,26918129 | 26,47491248 | 38,60867637 | 24,13901668 | 48,39298114 | -0,9070128   | 0,295778509  | -3,066527054 | 0,002165612 | 0,032965429 | 1,87515883  |
| NAP1L4   | 3586,129718  | 3005,372302 | 2909,703393 | 1958,527828 | 2686,445574 | 1962,412652 | 2922,213094 | -0,524457526 | 0,171278224  | -3,062021039 | 0,00219848  | 0,033390925 | 1,438392622 |
| PRKRIP1  | 394,2497851  | 538,2903238 | 323,6354033 | 200,1010827 | 280,1373727 | 253,0126563 | 239,2858294 | -0,781968198 | 0,255402041  | -3,061714762 | 0,002200731 | 0,033390925 | 1,719475068 |



|           |             |             |             |             |             |             |             |              |             |              |             |             |             |
|-----------|-------------|-------------|-------------|-------------|-------------|-------------|-------------|--------------|-------------|--------------|-------------|-------------|-------------|
| SPEF1     | 30,16501915 | 21,15766355 | 34,17268233 | 6,772652029 | 8,978761947 | 10,72845186 | 11,63351842 | -1,695313686 | 0,553728855 | -3,061631467 | 0,002201343 | 0,033390925 | 3,238472933 |
| DHRS2     | 386,5331523 | 503,355577  | 404,0417147 | 271,5217768 | 284,6267537 | 289,6682002 | 188,0454641 | -0,616059963 | 0,201381337 | -3,059171083 | 0,002219504 | 0,033626785 | 1,532683662 |
| LOC442028 | 101,0177385 | 141,7071419 | 98,49737143 | 52,94982495 | 67,3407146  | 62,58263584 | 43,67464894 | -0,910748281 | 0,297903303 | -3,057194309 | 0,002234194 | 0,033690808 | 1,880020354 |
| SLC9A7    | 873,3825311 | 1158,751108 | 981,9620777 | 574,4440312 | 721,8924605 | 545,3629695 | 1113,461464 | -0,711542176 | 0,232793145 | -3,05654265  | 0,002239056 | 0,033693532 | 1,637553653 |
| COQ10A    | 164,8553372 | 309,0002956 | 164,8329383 | 122,5234322 | 87,09399088 | 112,6487445 | 105,5552976 | -0,989532834 | 0,324299027 | -3,051297576 | 0,002278546 | 0,034159627 | 1,985541939 |
| ALDH3B1   | 168,3628976 | 135,8026777 | 185,9395951 | 104,052563  | 108,6430196 | 101,9202927 | 128,602665  | -0,632041505 | 0,207212126 | -3,050214856 | 0,002286777 | 0,034203386 | 1,549756447 |
| KIAA0825  | 14,73175354 | 21,15766355 | 19,09649895 | 6,772652029 | 3,591504779 | 5,364225929 | 9,850644612 | -1,783091816 | 0,585096103 | -3,047519555 | 0,002307385 | 0,034337157 | 3,441629548 |
| LZTFL1    | 455,2813355 | 643,5866029 | 397,0061624 | 278,9101245 | 334,9078206 | 338,8402712 | 917,5368628 | -0,656087931 | 0,215249327 | -3,048037084 | 0,002303415 | 0,034337157 | 1,575803813 |
| NFKB2     | 961,7730523 | 1502,194112 | 856,3272161 | 535,6552059 | 703,9349366 | 676,7865047 | 823,83395   | -0,794902972 | 0,260854636 | -3,047302451 | 0,002309052 | 0,034337157 | 1,734960686 |
| RALGAPB   | 1480,891986 | 1667,519111 | 1263,384167 | 1003,583892 | 1124,140996 | 975,3950815 | 850,5593236 | -0,509001102 | 0,167099704 | -3,046092191 | 0,002318367 | 0,034387123 | 1,423064548 |
| ARPC3     | 4239,93897  | 6829,496979 | 3773,066161 | 2903,620633 | 2763,662927 | 3391,978863 | 4313,902634 | -0,712684237 | 0,234259245 | -3,042288632 | 0,002347866 | 0,03471392  | 1,638850481 |
| FAM127C   | 208,3490857 | 229,2900283 | 192,9751473 | 147,7669534 | 133,783553  | 137,6817989 | 159,5262007 | -0,590828472 | 0,19427825  | -3,041145731 | 0,002356797 | 0,034765543 | 1,506111388 |
| OSBPL11   | 517,0143979 | 430,0418126 | 462,3362904 | 304,1536457 | 397,7591542 | 303,9728027 | 424,4542313 | -0,487878786 | 0,160443896 | -3,04080616  | 0,002359457 | 0,034765543 | 1,402381419 |
| ODF2L     | 89,79354537 | 117,1052076 | 105,5332837 | 55,41260751 | 66,44283841 | 55,4303346  | 109,4904523 | -0,822323669 | 0,270509383 | -3,039908118 | 0,002366503 | 0,03482952  | 1,768251725 |
| LZTS2     | 289,0229741 | 317,3649533 | 270,366222  | 222,8818213 | 210,1030296 | 207,4167359 | 297,8117165 | -0,455771519 | 0,150000849 | -3,038459597 | 0,00237791  | 0,034917587 | 1,371516063 |
| FBXO17    | 131,8842698 | 250,9397305 | 171,8684906 | 87,42878073 | 105,949391  | 103,708368  | 72,2976605  | -0,907310754 | 0,298667825 | -3,037859042 | 0,002382654 | 0,034947398 | 1,875546138 |
| MLYCD     | 145,9145112 | 110,7087046 | 123,6247037 | 81,88751998 | 91,58337186 | 65,26474881 | 120,6527476 | -0,667793445 | 0,219893937 | -3,03688885  | 0,002390336 | 0,035020187 | 1,588641334 |
| FAM227B   | 56,82247793 | 64,94910671 | 55,27933907 | 19,70226045 | 32,32354301 | 42,01976978 | 51,65686845 | -0,940189109 | 0,309962599 | -3,033234049 | 0,002419479 | 0,035326583 | 1,918779736 |
| MYEF2     | 256,0519067 | 263,7327364 | 207,0462518 | 194,5598219 | 139,1708102 | 150,198326  | 277,2924686 | -0,585252531 | 0,19308591  | -3,031047326 | 0,00243707  | 0,035543141 | 1,500301581 |
| C9orf64   | 324,0985778 | 343,4430037 | 281,4220898 | 187,1714742 | 221,7754201 | 212,7809619 | 131,5940719 | -0,614857401 | 0,20297243  | -3,029265603 | 0,002451491 | 0,035632387 | 1,506140622 |
| SAT2      | 246,2307377 | 223,385564  | 251,269723  | 150,2297359 | 158,0262103 | 180,5956063 | 191,9015672 | -0,56050139  | 0,185004652 | -3,029661055 | 0,002448283 | 0,035632387 | 1,474781669 |
| FNTA      | 1275,348949 | 1481,036449 | 1282,480666 | 863,2052858 | 1123,24312  | 998,6400605 | 990,9372153 | -0,438216831 | 0,144741486 | -3,027582784 | 0,002465182 | 0,035784625 | 1,354928602 |
| SNORA68   | 636,2714504 | 765,6121973 | 1668,430961 | 379,2685136 | 584,5174027 | 518,5418398 | 731,8226979 | -1,04992512  | 0,346858422 | -3,026955819 | 0,002470301 | 0,035784625 | 2,070422384 |
| SRI       | 458,0873838 | 649,9831058 | 466,356606  | 319,5460366 | 343,8865826 | 340,6283465 | 845,7450836 | -0,651857552 | 0,215345187 | -3,027035624 | 0,002469649 | 0,035784625 | 1,57118989  |
| MIMP16    | 236,4095687 | 233,7183764 | 180,9142006 | 152,0768228 | 117,6217815 | 155,5625519 | 330,4896973 | -0,617074724 | 0,204136348 | -3,0228557   | 0,002504016 | 0,036232269 | 1,533762099 |
| GPS1      | 2607,520376 | 3175,617687 | 2655,418433 | 2028,101435 | 2334,478106 | 2033,041627 | 1871,112075 | -0,400755223 | 0,132706319 | -3,01986541  | 0,00252887  | 0,036550833 | 1,320198829 |
| GLS       | 2034,385012 | 3439,350424 | 1844,319767 | 1395,782014 | 1450,967931 | 1623,572381 | 3268,997551 | -0,712008187 | 0,236194159 | -3,014503785 | 0,002574    | 0,037057346 | 1,638082691 |
| RNMTL1    | 235,0065445 | 404,4558009 | 259,3103542 | 142,256926  | 199,3285152 | 162,7148532 | 280,2875755 | -0,839319108 | 0,278645336 | -3,012141241 | 0,002594119 | 0,037221001 | 1,759205512 |
| ACVR2A    | 439,1465578 | 584,5419604 | 346,7522178 | 289,3769503 | 232,5499344 | 258,3768823 | 226,2755041 | -0,814086169 | 0,270593387 | -3,008522042 | 0,002625218 | 0,037458398 | 1,758184131 |
| AGPAT1    | 1432,487653 | 1917,474764 | 1246,297826 | 895,2214591 | 1092,715329 | 1044,235981 | 1197,30389  | -0,6018327   | 0,200043166 | -3,008514177 | 0,002625286 | 0,037458398 | 1,517643251 |
| SPATA24   | 38,58316402 | 59,04464247 | 25,1269723  | 20,93365173 | 13,46814292 | 19,66882841 | 28,3894258  | -1,196745121 | 0,397850192 | -3,008029518 | 0,002629476 | 0,037458398 | 2,292219373 |
| TSPAN17   | 220,976303  | 307,5241795 | 236,1935397 | 150,2297359 | 182,2688675 | 172,5492674 | 365,7765669 | -0,605798006 | 0,201375463 | -3,008300992 | 0,002627128 | 0,037458398 | 1,521820294 |
| USP4      | 235,0065445 | 224,3696414 | 215,0868829 | 156,3866923 | 180,4731151 | 136,7877612 | 185,2985117 | -0,511658901 | 0,170213643 | -3,005980564 | 0,002647259 | 0,037670059 | 1,4256886   |
| REEP2     | 49,10584512 | 74,29784177 | 55,27933907 | 27,70630375 | 25,14053345 | 37,54958151 | 31,55534663 | -0,995682455 | 0,331294312 | -3,005431779 | 0,002652041 | 0,037696448 | 1,994023558 |
| HSPA4     | 9636,671349 | 16390,79275 | 9615,589762 | 6385,995167 | 6819,369699 | 7511,704376 | 8646,567469 | -0,782944596 | 0,260793205 | -3,002166392 | 0,002680656 | 0,038019261 | 1,720639182 |
| NEK3      | 13,32872939 | 30,01435992 | 19,09649895 | 11,0825215  | 10,77451434 | 4,470188274 | 65,5529561  | -1,247968385 | 0,415832711 | -3,001130869 | 0,002689789 | 0,038106829 | 2,375067284 |
| CHMP1B    | 1161,002481 | 979,6490263 | 1101,566466 | 639,0920733 | 794,6204323 | 732,2168393 | 840,1400185 | -0,582362609 | 0,194394461 | -2,995777786 | 0,002737458 | 0,038527857 | 1,497299273 |
| CMPK2     | 106,6298351 | 93,97938926 | 100,5078892 | 43,09869473 | 58,36195265 | 66,15878646 | 42,74178108 | -0,853059168 | 0,284752549 | -2,995791155 | 0,002737338 | 0,038527857 | 1,8063271   |
| GTF2B     | 100,3162265 | 205,1801326 | 118,5993093 | 82,50321562 | 74,52372416 | 72,41705005 | 101,3398554 | -0,89212778  | 0,297660878 | -2,997128094 | 0,002725362 | 0,038527857 | 1,855911324 |
| USP42     | 248,3352739 | 289,3187481 | 252,248019  | 171,8987819 | 211,8987819 | 173,443305  | 188,3685978 | -0,497994083 | 0,166205313 | -2,996258512 | 0,002733146 | 0,038527857 | 1,412248612 |
| FRRS1     | 72,95725561 | 140,7230645 | 71,36060135 | 49,25565112 | 49,38319071 | 42,01976978 | 63,86446392 | -1,028417191 | 0,343346448 | -2,995275464 | 0,002741971 | 0,038549238 | 2,039785136 |
| HDLBP     | 10002,15914 | 12458,9116  | 9487,944742 | 6535,609208 | 7763,935455 | 7977,497995 | 8729,812902 | -0,520456145 | 0,173857188 | -2,993584277 | 0,002757213 | 0,038636992 | 1,434408701 |
| PAIP2B    | 79,27086427 | 129,4061747 | 89,4520214  | 51,10273803 | 55,66832407 | 36,65554385 | 41,18264068 | -1,058952461 | 0,353725013 | -2,993716649 | 0,002756018 | 0,038636992 | 2,083418205 |
| AMD1      | 1374,262151 | 1556,318368 | 1503,598023 | 986,3444136 | 1227,396758 | 1104,136504 | 1351,724297 | -0,419482534 | 0,140168691 | -2,992697809 | 0,002765234 | 0,038684541 | 1,337447753 |
| BCL3      | 82,77842463 | 85,12269289 | 76,38599581 | 50,4870424  | 26,03840965 | 51,85418398 | 67,55563106 | -0,922700305 | 0,308333783 | -2,992537162 | 0,00276669  | 0,038684541 | 1,895660098 |
| RWDD1     | 1299,20036  | 1537,128859 | 1163,881357 | 774,5451138 | 958,9317759 | 969,1368179 | 1359,811978 | -0,567514635 | 0,189707742 | -2,991520683 | 0,002775917 | 0,038684541 | 1,481968348 |
| TMEM65    | 414,5936352 | 362,6325125 | 340,7217445 | 259,8235596 | 295,4012681 | 277,151673  | 379,8430613 | -0,429317237 | 0,143519135 | -2,991358866 | 0,002777389 | 0,038684541 | 1,346596142 |
| RWDD3     | 284,8139017 | 332,6181526 | 327,6557189 | 245,1202011 | 206,5226983 | 259,0952048 | 479,870131  | -0,522878352 | 0,174870131 | -2,990009572 | 0,002788904 | 0,03878565  | 1,436819019 |
| MLLT6     | 647,4956435 | 878,7810954 | 601,0371775 | 512,2587716 | 506,4021738 | 432,714225  | 476,8285189 | -0,553638403 | 0,185244706 | -2,988686779 | 0,002801792 | 0,038922844 | 1,467782705 |
| FOXC2     | 246,2307377 | 355,7439709 | 255,2900386 | 180,3988222 | 178,6773627 | 167,1850415 | 115,2938311 | -0,707022282 | 0,236732792 | -2,986583631 | 0,002821137 | 0,039149351 | 1,632431305 |

|              |             |             |             |             |             |             |             |              |             |              |             |             |             |
|--------------|-------------|-------------|-------------|-------------|-------------|-------------|-------------|--------------|-------------|--------------|-------------|-------------|-------------|
| C11orf74     | 167,6613855 | 272,097394  | 181,9192795 | 142,2256926 | 94,27700044 | 104,6024056 | 117,5438784 | -0,865191982 | 0,289917833 | -2,984266167 | 0,002842594 | 0,039404653 | 1,821582052 |
| EBF1         | 137,4963663 | 68,88541621 | 108,5485204 | 51,10273803 | 62,85133363 | 43,80784509 | 51,03275638 | -0,993099364 | 0,332863585 | -2,983502577 | 0,002849696 | 0,039460634 | 1,990456529 |
| ZBTB6        | 176,0795304 | 264,224775  | 165,8380172 | 117,597867  | 123,2132863 | 123,3771964 | 139,7332258 | -0,749936094 | 0,251593635 | -2,980743507 | 0,002875495 | 0,03977511  | 1,681718335 |
| ACTR8        | 963,8775885 | 1549,429826 | 1012,114444 | 658,7943337 | 806,2928228 | 798,3756258 | 838,8198881 | -0,641283862 | 0,215322582 | -2,978247127 | 0,002899021 | 0,040057508 | 1,559716542 |
| CCDC113      | 56,12096585 | 42,80736579 | 45,22855015 | 22,165043   | 26,03840965 | 21,45690372 | 19,92178121 | -1,051098357 | 0,35307698  | -2,976966542 | 0,002911158 | 0,040139068 | 2,07210679  |
| SLC2A1-AS1   | 22,44838634 | 28,04620517 | 31,15744566 | 12,92960842 | 12,57026673 | 11,62248951 | 19,60506102 | -1,126257133 | 0,378311155 | -2,977065623 | 0,002910217 | 0,040139068 | 2,182916783 |
| MICALL1      | 299,5456552 | 359,6802804 | 337,7065078 | 248,1253425 | 228,0605534 | 233,3438279 | 633,0772475 | -0,490225301 | 0,164735939 | -2,975824857 | 0,002922017 | 0,040245704 | 1,404664221 |
| CCDC9        | 387,2346644 | 468,4208302 | 423,1382136 | 176,7046484 | 296,2991442 | 232,4497903 | 304,4201416 | -0,860961051 | 0,289588879 | -2,973045978 | 0,002948603 | 0,040394696 | 1,816247801 |
| DSEL         | 268,679124  | 316,3808759 | 264,3357486 | 177,9360397 | 205,6136486 | 170,7611921 | 168,5488102 | -0,619131938 | 0,208214475 | -2,973529757 | 0,002943959 | 0,040394696 | 1,53595073  |
| SLC25A51     | 155,7356802 | 218,9572158 | 174,8837272 | 96,04851968 | 101,46001   | 122,4831587 | 195,2732796 | -0,785705307 | 0,264299447 | -2,97278453  | 0,002951115 | 0,040394696 | 1,723934914 |
| TSPY26P      | 54,01642963 | 80,69434471 | 68,34536467 | 28,32199939 | 33,2214192  | 38,44361916 | 25,66559558 | -1,032237025 | 0,347098365 | -2,973903448 | 0,002940376 | 0,040394696 | 2,045193045 |
| UBE2T        | 1659,076053 | 2998,48376  | 1670,441119 | 1202,453583 | 1285,758711 | 1326,75188  | 1639,992469 | -0,731007005 | 0,2459044   | -2,972728447 | 0,002951655 | 0,040394696 | 1,65979723  |
| DEPDC7       | 128,3767094 | 248,9715757 | 151,7669127 | 123,7548234 | 64,64708602 | 78,67531363 | 138,8445094 | -0,983603122 | 0,330979698 | -2,971792917 | 0,002960663 | 0,040461099 | 1,977397786 |
| ZNF627       | 32,26955537 | 26,07805042 | 23,11681452 | 14,77669534 | 13,46814292 | 9,834414204 | 31,73831753 | -1,088284441 | 0,366272175 | -2,971245197 | 0,002965949 | 0,040461322 | 2,126210511 |
| ACOX1        | 666,4364695 | 685,90193   | 628,1743076 | 498,7134676 | 499,2191642 | 533,74048   | 595,8300008 | -0,372776135 | 0,125521606 | -2,969816482 | 0,002979777 | 0,040594345 | 1,29484206  |
| NTPCR        | 494,5660116 | 509,75208   | 566,8644952 | 363,260427  | 407,6357924 | 337,9462335 | 413,8688372 | -0,501747366 | 0,168962006 | -2,969586938 | 0,002982004 | 0,040594345 | 1,415927469 |
| COG6         | 296,0380949 | 259,7964269 | 266,3459064 | 179,1674309 | 211,8987819 | 194,0061711 | 229,7309869 | -0,493349164 | 0,166230958 | -2,967853705 | 0,00299887  | 0,040737818 | 1,407709031 |
| ZRANB1       | 566,8217551 | 941,7620474 | 537,7172073 | 414,9788607 | 405,84004   | 433,6082626 | 451,7982372 | -0,708537919 | 0,238843039 | -2,966542052 | 0,003011692 | 0,040868879 | 1,634147172 |
| CHD8         | 886,7112605 | 1205,986822 | 814,1139027 | 647,7118122 | 606,9643076 | 687,5149566 | 680,0739965 | -0,58353151  | 0,196736372 | -2,966058107 | 0,003016435 | 0,040890157 | 1,498512907 |
| RPS6KA3      | 1466,160233 | 1820,051104 | 1375,953003 | 1075,004586 | 1217,52012  | 1039,765793 | 1005,187511 | -0,485825298 | 0,164177824 | -2,959140796 | 0,003084981 | 0,04168771  | 1,400386732 |
| SLC2A12      | 70,15120732 | 44,28348185 | 53,26918129 | 25,85921684 | 29,62991442 | 27,7151673  | 25,64227313 | -1,011208007 | 0,342084184 | -2,956020923 | 0,003116359 | 0,04202138  | 2,015598107 |
| TUBG1        | 4421,630597 | 9612,959832 | 4674,621928 | 3401,718405 | 3655,253989 | 3110,357001 | 4025,205403 | -0,880035777 | 0,297691485 | -2,956200706 | 0,003114543 | 0,04202138  | 1,840420941 |
| CASP10       | 119,2570524 | 120,0574397 | 109,5535992 | 74,49917232 | 82,60460991 | 53,64225929 | 84,21454885 | -0,727105066 | 0,246101698 | -2,954490246 | 0,003131861 | 0,042144305 | 1,655314178 |
| ARNTL        | 353,5620849 | 252,4158466 | 286,4474843 | 197,0515248 | 191,3240581 | 174,1296143 | -0,58405747 | 0,197725762  | 0,297725762 | -2,953876438 | 0,003138096 | 0,042184137 | 1,499059316 |
| SS18L2       | 105,226811  | 166,801115  | 135,6856504 | 76,96195487 | 71,83009557 | 85,82761487 | 119,0676854 | -0,801178725 | 0,271364254 | -2,952410693 | 0,003153033 | 0,042252606 | 1,74252424  |
| IMPA1        | 271,4851723 | 330,1579591 | 296,4982732 | 228,4230821 | 218,1839153 | 199,370397  | 315,0067606 | -0,475721684 | 0,161413767 | -2,947218773 | 0,003206463 | 0,042879362 | 1,390613677 |
| ZER1         | 489,6554271 | 854,6711997 | 439,2194759 | 323,2402105 | 318,7460491 | 361,1912126 | 334,9972482 | -0,832818372 | 0,28279302  | -2,944974993 | 0,003229808 | 0,043102034 | 1,781161548 |
| AMIGO3       | 52,61340549 | 60,52075853 | 73,37075913 | 39,40452089 | 32,32354301 | 35,7615062  | 60,18803336 | -0,778319492 | 0,264520811 | -2,942375267 | 0,00325705  | 0,043193781 | 1,715131855 |
| C6orf47      | 303,7547277 | 347,3793132 | 261,320512  | 198,2539957 | 232,5499344 | 211,8869242 | 283,029806  | -0,513108538 | 0,174366948 | -2,942693812 | 0,0032537   | 0,043193781 | 1,427121868 |
| LOC100289361 | 16,13477768 | 14,26912193 | 14,07110449 | 4,309869473 | 8,080885752 | 3,57615062  | 15,95082318 | -1,501590734 | 0,510232206 | -2,94295561  | 0,00325095  | 0,043193781 | 2,831547504 |
| MED13L       | 1606,462648 | 1226,160409 | 1317,658428 | 800,4043307 | 1046,025767 | 1059,434621 | 964,9758048 | -0,515179286 | 0,175126143 | -2,941761165 | 0,003263515 | 0,043193781 | 1,429171734 |
| WDR36        | 1641,538251 | 1622,251552 | 1314,643191 | 1044,219804 | 1150,179405 | 1144,368198 | 1143,209276 | -0,456971416 | 0,155291503 | -2,942668509 | 0,003253966 | 0,043193781 | 1,372657235 |
| LMO7         | 151,5266078 | 175,6578113 | 143,7262816 | 105,2839543 | 95,17487664 | 110,8606692 | 261,3256329 | -0,601794247 | 0,20459972  | -2,941324881 | 0,003268116 | 0,043210261 | 1,517602801 |
| LYPD6B       | 75,7633039  | 121,5335557 | 78,39615359 | 39,40452089 | 40,40442876 | 55,4303346  | 35,34175379 | -1,038458243 | 0,353314481 | -2,939189582 | 0,003290717 | 0,043464468 | 2,054031409 |
| SEC11A       | 2281,317262 | 2674,722304 | 2119,711384 | 1386,546579 | 1822,688675 | 1751,419766 | 2038,933249 | -0,513496227 | 0,174905024 | -2,935857497 | 0,003326271 | 0,043844131 | 1,427505424 |
| RHOBTB1      | 24,55292256 | 45,75959791 | 35,17776123 | 14,77669534 | 19,75327628 | 10,72845186 | 32,07881947 | -1,230678523 | 0,419260839 | -2,935352908 | 0,003331685 | 0,043870596 | 2,346773364 |
| CAMLG        | 798,3207393 | 1436,752967 | 830,1951649 | 545,5063361 | 647,3687364 | 512,2835762 | 684,1949139 | -0,847390472 | 0,288843399 | -2,933736674 | 0,003349082 | 0,044009673 | 1,799243532 |
| ING5         | 233,6035204 | 253,8919626 | 234,1833819 | 135,4530406 | 199,3285152 | 166,2910038 | 248,1137984 | -0,534404832 | 0,182412254 | -2,929654234 | 0,003393393 | 0,044467781 | 1,448344532 |
| XPNPPE3      | 231,4989841 | 217,9731384 | 189,9599106 | 142,2256926 | 171,4943532 | 149,3042884 | 271,0066379 | -0,473831453 | 0,161740901 | -2,929570998 | 0,003394303 | 0,044467781 | 1,388792877 |
| TIPIN        | 554,8960499 | 1264,539426 | 673,4028578 | 447,6107295 | 500,1170404 | 466,6876558 | 548,7186495 | -0,819565699 | 0,279833526 | -2,928761644 | 0,003403153 | 0,044538416 | 1,764874625 |
| TMEM127      | 1626,104986 | 1559,2706   | 1651,34462  | 1105,173672 | 1241,762777 | 1245,394453 | 1506,402743 | -0,429391249 | 0,146676968 | -2,927461998 | 0,003417408 | 0,044634263 | 1,346665226 |
| C18orf32     | 175,3780183 | 268,6531232 | 170,8634117 | 129,2960842 | 125,7026673 | 124,271234  | 159,0653695 | -0,703277276 | 0,240277557 | -2,926937019 | 0,003423182 | 0,044664374 | 1,628199269 |
| HDHD2        | 361,2787177 | 452,1835536 | 367,8588745 | 233,9643428 | 219,9796677 | 243,1782421 | 368,4690109 | -0,762125216 | 0,260838475 | -2,921828213 | 0,003479834 | 0,045265964 | 1,695987123 |
| RBM15B       | 267,2760999 | 370,0130928 | 276,3966954 | 169,9319964 | 226,2648011 | 207,4167359 | 202,2579422 | -0,605270166 | 0,207189906 | -2,921330378 | 0,0034854   | 0,045292616 | 1,521263606 |
| OTUD7B       | 282,7093655 | 405,4398783 | 308,5592199 | 193,9441263 | 228,9584296 | 230,661715  | 356,3257208 | -0,614120194 | 0,210471746 | -2,917827238 | 0,003524796 | 0,045666318 | 1,530624284 |
| POLR2A       | 3088,757658 | 6014,188874 | 2997,145257 | 2050,882173 | 2372,188906 | 2428,206271 | 3024,597179 | -0,821056823 | 0,281459863 | -2,917136444 | 0,003532612 | 0,045721586 | 1,766699686 |
| TMA16        | 1233,258225 | 1734,928411 | 1467,415183 | 844,118721  | 1139,404891 | 962,8785543 | 1057,834986 | -0,591259394 | 0,202769447 | -2,915919546 | 0,003546419 | 0,045854206 | 1,50656132  |
| BTN2A2       | 171,1689459 | 207,1482873 | 177,8989639 | 123,7548234 | 131,0899244 | 109,9666316 | 142,0644388 | -0,611119265 | 0,209668612 | -2,914691232 | 0,003560406 | 0,045915523 | 1,527443764 |
| MRPS11       | 989,1320232 | 1526,304008 | 895,5252929 | 627,3938561 | 802,701318  | 769,7664209 | 743,721058  | -0,635233273 | 0,217951704 | -2,914559788 | 0,003561906 | 0,045915523 | 1,553188869 |
| PPM1L        | 196,4233805 | 123,5017105 | 153,7770705 | 97,27991096 | 97,86850522 | 92,08587845 | 82,9535777  | -0,718356425 | 0,246497731 | -2,914251676 | 0,003565423 | 0,045915523 | 1,645306568 |

|          |             |             |             |             |             |             |             |              |             |              |             |             |             |
|----------|-------------|-------------|-------------|-------------|-------------|-------------|-------------|--------------|-------------|--------------|-------------|-------------|-------------|
| ROPN1L   | 104,5252989 | 124,9778266 | 108,5485204 | 56,02830315 | 70,93221938 | 63,4766735  | 81,17116082 | -0,83467812  | 0,286750408 | -2,910817553 | 0,003604844 | 0,046362805 | 1,783459087 |
| ZNF192   | 424,4148043 | 503,355577  | 389,9706102 | 255,5136902 | 320,5418015 | 262,8470705 | 366,6644643 | -0,654602395 | 0,225280188 | -2,905725532 | 0,003664027 | 0,046950586 | 1,57418205  |
| PBXIP1   | 258,1564429 | 431,5179287 | 294,4881154 | 203,7952565 | 229,8563058 | 168,9731168 | 228,824199  | -0,710825056 | 0,244746917 | -2,904326899 | 0,003680437 | 0,047082944 | 1,636739876 |
| AIMP2    | 1118,210245 | 1608,966507 | 1218,155617 | 789,9375048 | 944,5657568 | 887,7793913 | 1052,33376  | -0,590675976 | 0,203565474 | -2,901651076 | 0,003712017 | 0,047376968 | 1,505952197 |
| OGDH     | 733,0801165 | 827,1170332 | 797,0275615 | 612,6171608 | 621,3303267 | 569,5019862 | 685,9234218 | -0,386351087 | 0,133604859 | -2,891744294 | 0,003831096 | 0,048655677 | 1,307083301 |
| ZDHHCL16 | 1173,629698 | 1591,253115 | 1324,69398  | 1022,670456 | 993,9489475 | 856,4880734 | 1172,967224 | -0,509616003 | 0,176220031 | -2,891930046 | 0,003828832 | 0,048655677 | 1,423671212 |
| GMPPA    | 931,6080332 | 1377,708324 | 851,3018217 | 677,8808985 | 605,1685552 | 708,0778227 | 700,4033934 | -0,667968057 | 0,231074724 | -2,890701523 | 0,00384383  | 0,048721302 | 1,588833621 |
| ABCA12   | 2,10453622  | 3,936309498 | 5,025394461 | 0           | 0,897876195 | 0           | 47,01699961 | -3,669772737 | 1,270110606 | -2,889333195 | 0,003860598 | 0,04888572  | 12,7265788  |
| KIF13B   | 287,61995   | 309,0002956 | 276,3966954 | 198,8696914 | 207,409401  | 206,5226983 | 343,6664625 | -0,513446754 | 0,177906702 | -2,886045039 | 0,003901163 | 0,049254098 | 1,427456472 |
| TERF2IP  | 766,0511839 | 872,8766312 | 669,3825422 | 514,1058585 | 558,4789931 | 506,9193503 | 600,3863764 | -0,549235133 | 0,190271923 | -2,886580032 | 0,003894537 | 0,049254098 | 1,463309694 |
| GOLGA5   | 580,1504845 | 772,0087003 | 516,6105506 | 458,693251  | 404,9421638 | 420,1976978 | 461,9014456 | -0,54385796  | 0,188504065 | -2,885125901 | 0,003912572 | 0,049349752 | 1,457865838 |
| PPP1R2   | 462,9979683 | 581,5897283 | 535,7070495 | 386,0411656 | 382,4952589 | 383,5421539 | 415,7114078 | -0,456749159 | 0,158358735 | -2,884268807 | 0,003923237 | 0,049435859 | 1,372445784 |
| THTPA    | 110,8389076 | 143,6752967 | 114,5789937 | 88,04447637 | 78,11522894 | 68,84089943 | 95,4224371  | -0,652129615 | 0,226258846 | -2,882228143 | 0,003948737 | 0,049611548 | 1,571486213 |
| PSMC6    | 2445,471087 | 3082,622376 | 2225,244667 | 1533,082141 | 1960,063733 | 2063,438907 | 2246,800014 | -0,482003065 | 0,167299815 | -2,881073504 | 0,003963232 | 0,049696691 | 1,3966815   |
| DRD2     | 83,47993671 | 121,0415171 | 72,36568024 | 44,94578165 | 46,68956212 | 52,74822164 | 35,10589162 | -0,950772579 | 0,330136722 | -2,879935849 | 0,003977561 | 0,049823685 | 1,932907474 |
| PPP2CA   | 2304,46716  | 2998,48376  | 2195,092301 | 1610,044096 | 1668,25397  | 1781,817046 | 1877,37084  | -0,568014269 | 0,197289318 | -2,879092873 | 0,003988209 | 0,049823685 | 1,482481672 |
| ZNF430   | 255,3503946 | 333,1101913 | 275,3916165 | 163,77504   | 213,6945343 | 198,4763594 | 286,1092713 | -0,590868861 | 0,205261219 | -2,878619079 | 0,003994205 | 0,049842409 | 1,506153553 |
