# Supplementary material for: Analysis of the Role of FRMD5 in the Biology of Papillary Thyroid Carcinoma
Source: MDPI journal article supplement (doi:10.3390/ijms22136726), 2021-06-23
Supplement: s1 [file s1]

**Supplementary Table S6. Gene ontology (GO) enrichment analysis of the downregulated genes in TPC1 siFRMD5 (in comparison with TPC1 siNEG).**

| GOID       | GO Term                                                                 | Ontology Source                                                 | Term PValue | Term PValue Corrected with Benjamini-Hochberg | Group PValue | Group PValue Corrected with Benjamini-Hochberg | GO Levels                              | GO Groups | % Associated Genes | Nr. Genes |
|------------|-------------------------------------------------------------------------|-----------------------------------------------------------------|-------------|-----------------------------------------------|--------------|------------------------------------------------|----------------------------------------|-----------|--------------------|-----------|
| GO:0033554 | cellular response to stress                                             | GO_BiologicalProcess-EBI-UniProt-GOA-ACAP-ARAP_08.05.2020_00h00 | 4,0841E-08  | 1,39335E-06                                   | 1,8284E-15   | 1,8467E-13                                     | [3]                                    | Group091  | 6,24               | 137,00    |
| GO:0006974 | cellular response to DNA damage stimulus                                | GO_BiologicalProcess-EBI-UniProt-GOA-ACAP-ARAP_08.05.2020_00h00 | 1,068E-07   | 2,95603E-06                                   | 1,8284E-15   | 1,8467E-13                                     | [4]                                    | Group091  | 7,66               | 70,00     |
| GO:0006259 | DNA metabolic process                                                   | GO_BiologicalProcess-EBI-UniProt-GOA-ACAP-ARAP_08.05.2020_00h00 | 4,5874E-07  | 1,01965E-05                                   | 1,8284E-15   | 1,8467E-13                                     | [4, 5, 6]                              | Group091  | 7,26               | 73,00     |
| GO:0051276 | chromosome organization                                                 | GO_BiologicalProcess-EBI-UniProt-GOA-ACAP-ARAP_08.05.2020_00h00 | 7,9756E-12  | 1,30003E-09                                   | 1,8284E-15   | 1,8467E-13                                     | [5]                                    | Group091  | 7,92               | 104,00    |
| GO:0051052 | regulation of DNA metabolic process                                     | GO_BiologicalProcess-EBI-UniProt-GOA-ACAP-ARAP_08.05.2020_00h00 | 0,00325071  | 0,019306853                                   | 1,8284E-15   | 1,8467E-13                                     | [4, 5, 6, 7]                           | Group091  | 7,01               | 27,00     |
| GO:0000723 | telomere maintenance                                                    | GO_BiologicalProcess-EBI-UniProt-GOA-ACAP-ARAP_08.05.2020_00h00 | 0,00071636  | 0,00695961                                    | 1,8284E-15   | 1,8467E-13                                     | [5, 6, 7]                              | Group091  | 9,60               | 17,00     |
| GO:0006281 | DNA repair                                                              | GO_BiologicalProcess-EBI-UniProt-GOA-ACAP-ARAP_08.05.2020_00h00 | 1,3176E-05  | 0,000210103                                   | 1,8284E-15   | 1,8467E-13                                     | [5, 6, 7]                              | Group091  | 7,74               | 46,00     |
| GO:0006310 | DNA recombination                                                       | GO_BiologicalProcess-EBI-UniProt-GOA-ACAP-ARAP_08.05.2020_00h00 | 0,00279497  | 0,017673336                                   | 1,8284E-15   | 1,8467E-13                                     | [5, 6, 7]                              | Group091  | 7,38               | 24,00     |
| GO:0032200 | telomere organization                                                   | GO_BiologicalProcess-EBI-UniProt-GOA-ACAP-ARAP_08.05.2020_00h00 | 2,0731E-06  | 4,00159E-05                                   | 1,8284E-15   | 1,8467E-13                                     | [6]                                    | Group091  | 12,11              | 23,00     |
| GO:0000726 | non-recombinational repair                                              | GO_BiologicalProcess-EBI-UniProt-GOA-ACAP-ARAP_08.05.2020_00h00 | 3,3384E-05  | 0,000484896                                   | 1,8284E-15   | 1,8467E-13                                     | [6, 7, 8]                              | Group091  | 13,51              | 15,00     |
| GO:0006302 | double-strand break repair                                              | GO_BiologicalProcess-EBI-UniProt-GOA-ACAP-ARAP_08.05.2020_00h00 | 1,8599E-05  | 0,000281284                                   | 1,8284E-15   | 1,8467E-13                                     | [6, 7, 8]                              | Group091  | 9,71               | 27,00     |
| GO:0016233 | telomere capping                                                        | GO_BiologicalProcess-EBI-UniProt-GOA-ACAP-ARAP_08.05.2020_00h00 | 0,002222    | 0,015232097                                   | 1,8284E-15   | 1,8467E-13                                     | [6, 7, 8]                              | Group091  | 13,56              | 8,00      |
| GO:0016458 | gene silencing                                                          | GO_BiologicalProcess-EBI-UniProt-GOA-ACAP-ARAP_08.05.2020_00h00 | 3,1514E-12  | 7,70521E-10                                   | 2,4838E-14   | 1,2543E-12                                     | [2, 5, 6, 7]                           | Group078  | 14,39              | 39,00     |
| GO:0040029 | regulation of gene expression, epigenetic                               | GO_BiologicalProcess-EBI-UniProt-GOA-ACAP-ARAP_08.05.2020_00h00 | 1,9685E-14  | 7,21956E-12                                   | 2,4838E-14   | 1,2543E-12                                     | [5, 6]                                 | Group078  | 14,12              | 48,00     |
| GO:0045814 | negative regulation of gene expression, epigenetic                      | GO_BiologicalProcess-EBI-UniProt-GOA-ACAP-ARAP_08.05.2020_00h00 | 5,7268E-20  | 4,20059E-17                                   | 2,4838E-14   | 1,2543E-12                                     | [5, 6, 7]                              | Group078  | 28,10              | 34,00     |
| GO:0034401 | chromatin organization involved in regulation of transcription          | GO_BiologicalProcess-EBI-UniProt-GOA-ACAP-ARAP_08.05.2020_00h00 | 6,8998E-21  | 1,0122E-17                                    | 2,4838E-14   | 1,2543E-12                                     | [5, 6, 7, 8, 9, 10, 11]                | Group078  | 24,54              | 40,00     |
| GO:0006342 | chromatin silencing                                                     | GO_BiologicalProcess-EBI-UniProt-GOA-ACAP-ARAP_08.05.2020_00h00 | 5,9328E-12  | 1,08793E-09                                   | 2,4838E-14   | 1,2543E-12                                     | [3, 6, 7, 8, 9, 10, 11, 12, 13]        | Group078  | 27,03              | 20,00     |
| GO:0031935 | regulation of chromatin silencing                                       | GO_BiologicalProcess-EBI-UniProt-GOA-ACAP-ARAP_08.05.2020_00h00 | 9,3095E-05  | 0,001167273                                   | 2,4838E-14   | 1,2543E-12                                     | [4, 5, 6, 7, 8, 9, 10, 11, 12, 13, 14] | Group078  | 30,00              | 6,00      |
| GO:0097549 | chromatin organization involved in negative regulation of transcription | GO_BiologicalProcess-EBI-UniProt-GOA-ACAP-ARAP_08.05.2020_00h00 | 1,0992E-18  | 5,37508E-16                                   | 2,4838E-14   | 1,2543E-12                                     | [6, 7, 8, 9, 10, 11, 12]               | Group078  | 24,16              | 36,00     |
| GO:0060968 | regulation of gene silencing                                            | GO_BiologicalProcess-EBI-UniProt-GOA-ACAP-ARAP_08.05.2020_00h00 | 4,5206E-08  | 1,50719E-06                                   | 7,0536E-14   | 2,3747E-12                                     | [3, 4, 5, 6, 7, 8]                     | Group072  | 15,49              | 22,00     |

|            |                                                         |                                                                 |            |             |            |            |                                        |          |       |        |
|------------|---------------------------------------------------------|-----------------------------------------------------------------|------------|-------------|------------|------------|----------------------------------------|----------|-------|--------|
| GO:0045815 | positive regulation of gene expression, epigenetic      | GO_BiologicalProcess-EBI-UniProt-GOA-ACAP-ARAP_08.05.2020_00h00 | 4,6028E-05 | 0,000643077 | 7,0536E-14 | 2,3747E-12 | [5, 6, 7]                              | Group072 | 16,92 | 11,00  |
| GO:1902275 | regulation of chromatin organization                    | GO_BiologicalProcess-EBI-UniProt-GOA-ACAP-ARAP_08.05.2020_00h00 | 0,00835802 | 0,035956629 | 7,0536E-14 | 2,3747E-12 | [5, 6, 7]                              | Group072 | 7,77  | 16,00  |
| GO:0006342 | chromatin silencing                                     | GO_BiologicalProcess-EBI-UniProt-GOA-ACAP-ARAP_08.05.2020_00h00 | 5,9328E-12 | 1,08793E-09 | 7,0536E-14 | 2,3747E-12 | [3, 6, 7, 8, 9, 10, 11, 12, 13]        | Group072 | 27,03 | 20,00  |
| GO:0031935 | regulation of chromatin silencing                       | GO_BiologicalProcess-EBI-UniProt-GOA-ACAP-ARAP_08.05.2020_00h00 | 9,3095E-05 | 0,001167273 | 7,0536E-14 | 2,3747E-12 | [4, 5, 6, 7, 8, 9, 10, 11, 12, 13, 14] | Group072 | 30,00 | 6,00   |
| GO:0006348 | chromatin silencing at telomere                         | GO_BiologicalProcess-EBI-UniProt-GOA-ACAP-ARAP_08.05.2020_00h00 | 0,00609474 | 0,029314715 | 7,0536E-14 | 2,3747E-12 | [4, 7, 8, 9, 10, 11, 12, 13, 14]       | Group072 | 30,00 | 3,00   |
| GO:0000183 | rDNA heterochromatin assembly                           | GO_BiologicalProcess-EBI-UniProt-GOA-ACAP-ARAP_08.05.2020_00h00 | 1,9475E-10 | 2,19768E-08 | 1,5032E-11 | 3,7957E-10 | [7, 8, 9, 10, 11, 12, 13, 14]          | Group104 | 35,00 | 14,00  |
| GO:0050793 | regulation of developmental process                     | GO_BiologicalProcess-EBI-UniProt-GOA-ACAP-ARAP_08.05.2020_00h00 | 5,3426E-07 | 1,16979E-05 | 1,5032E-11 | 3,7957E-10 | [2, 3]                                 | Group104 | 5,74  | 161,00 |
| GO:0051239 | regulation of multicellular organismal process          | GO_BiologicalProcess-EBI-UniProt-GOA-ACAP-ARAP_08.05.2020_00h00 | 1,3622E-05 | 0,00021487  | 1,5032E-11 | 3,7957E-10 | [2, 3]                                 | Group104 | 5,31  | 181,00 |
| GO:0046983 | protein dimerization activity                           | GO_MolecularFunction-EBI-UniProt-GOA-ACAP-ARAP_08.05.2020_00h00 | 2,6335E-07 | 6,43893E-06 | 1,5032E-11 | 3,7957E-10 | [3]                                    | Group104 | 7,16  | 79,00  |
| GO:0051093 | negative regulation of developmental process            | GO_BiologicalProcess-EBI-UniProt-GOA-ACAP-ARAP_08.05.2020_00h00 | 0,00806685 | 0,03511592  | 1,5032E-11 | 3,7957E-10 | [2, 3, 4]                              | Group104 | 5,49  | 58,00  |
| GO:0051094 | positive regulation of developmental process            | GO_BiologicalProcess-EBI-UniProt-GOA-ACAP-ARAP_08.05.2020_00h00 | 0,00128977 | 0,010118128 | 1,5032E-11 | 3,7957E-10 | [2, 3, 4]                              | Group104 | 5,55  | 82,00  |
| GO:0051240 | positive regulation of multicellular organismal process | GO_BiologicalProcess-EBI-UniProt-GOA-ACAP-ARAP_08.05.2020_00h00 | 0,00121394 | 0,009731382 | 1,5032E-11 | 3,7957E-10 | [2, 3, 4]                              | Group104 | 5,34  | 102,00 |
| GO:0022603 | regulation of anatomical structure morphogenesis        | GO_BiologicalProcess-EBI-UniProt-GOA-ACAP-ARAP_08.05.2020_00h00 | 0,00284967 | 0,017713821 | 1,5032E-11 | 3,7957E-10 | [3, 4]                                 | Group104 | 5,62  | 66,00  |
| GO:0035295 | tube development                                        | GO_BiologicalProcess-EBI-UniProt-GOA-ACAP-ARAP_08.05.2020_00h00 | 0,00965585 | 0,039567392 | 1,5032E-11 | 3,7957E-10 | [3, 4]                                 | Group104 | 5,39  | 61,00  |
| GO:0045595 | regulation of cell differentiation                      | GO_BiologicalProcess-EBI-UniProt-GOA-ACAP-ARAP_08.05.2020_00h00 | 1,4649E-06 | 2,90403E-05 | 1,5032E-11 | 3,7957E-10 | [3, 4]                                 | Group104 | 6,06  | 120,00 |
| GO:0048729 | tissue morphogenesis                                    | GO_BiologicalProcess-EBI-UniProt-GOA-ACAP-ARAP_08.05.2020_00h00 | 0,01362663 | 0,048285682 | 1,5032E-11 | 3,7957E-10 | [3, 4]                                 | Group104 | 5,69  | 41,00  |
| GO:2000026 | regulation of multicellular organismal development      | GO_BiologicalProcess-EBI-UniProt-GOA-ACAP-ARAP_08.05.2020_00h00 | 1,1047E-06 | 2,25077E-05 | 1,5032E-11 | 3,7957E-10 | [3, 4]                                 | Group104 | 5,95  | 132,00 |
| GO:0002520 | immune system development                               | GO_BiologicalProcess-EBI-UniProt-GOA-ACAP-ARAP_08.05.2020_00h00 | 2,2993E-06 | 4,32451E-05 | 1,5032E-11 | 3,7957E-10 | [2, 4, 5]                              | Group104 | 6,92  | 74,00  |
| GO:0003677 | DNA binding                                             | GO_MolecularFunction-EBI-UniProt-GOA-ACAP-ARAP_08.05.2020_00h00 | 2,631E-05  | 0,00038987  | 1,5032E-11 | 3,7957E-10 | [4]                                    | Group104 | 5,47  | 146,00 |
| GO:0006996 | organelle organization                                  | GO_BiologicalProcess-EBI-UniProt-GOA-ACAP-ARAP_08.05.2020_00h00 | 4,4619E-12 | 9,3508E-10  | 1,5032E-11 | 3,7957E-10 | [4]                                    | Group104 | 5,89  | 246,00 |
| GO:0009890 | negative regulation of biosynthetic process             | GO_BiologicalProcess-EBI-UniProt-GOA-ACAP-ARAP_08.05.2020_00h00 | 4,8092E-09 | 2,07501E-07 | 1,5032E-11 | 3,7957E-10 | [3, 4, 5]                              | Group104 | 6,77  | 118,00 |
| GO:0035239 | tube morphogenesis                                      | GO_BiologicalProcess-EBI-UniProt-GOA-ACAP-ARAP_08.05.2020_00h00 | 0,00081955 | 0,007756677 | 1,5032E-11 | 3,7957E-10 | [3, 4, 5]                              | Group104 | 6,15  | 56,00  |
| GO:0045596 | negative regulation of cell differentiation             | GO_BiologicalProcess-EBI-UniProt-GOA-ACAP-ARAP_08.05.2020_00h00 | 0,00273721 | 0,01738303  | 1,5032E-11 | 3,7957E-10 | [3, 4, 5]                              | Group104 | 6,06  | 47,00  |
| GO:0045597 | positive regulation of cell differentiation             | GO_BiologicalProcess-EBI-UniProt-GOA-ACAP-ARAP_08.05.2020_00h00 | 0,00057936 | 0,005943533 | 1,5032E-11 | 3,7957E-10 | [3, 4, 5]                              | Group104 | 6,03  | 64,00  |

|            |                                                                         |                                                                 |            |             |            |            |                    |          |       |        |
|------------|-------------------------------------------------------------------------|-----------------------------------------------------------------|------------|-------------|------------|------------|--------------------|----------|-------|--------|
| GO:0046982 | protein heterodimerization activity                                     | GO_MolecularFunction-EBI-UniProt-GOA-ACAP-ARAP_08.05.2020_00h00 | 1,0363E-10 | 1,52032E-08 | 1,5032E-11 | 3,7957E-10 | [4]                | Group104 | 12,21 | 42,00  |
| GO:0051130 | positive regulation of cellular component organization                  | GO_BiologicalProcess-EBI-UniProt-GOA-ACAP-ARAP_08.05.2020_00h00 | 0,00397208 | 0,021988861 | 1,5032E-11 | 3,7957E-10 | [3, 4, 5]          | Group104 | 5,46  | 71,00  |
| GO:0048534 | hematopoietic or lymphoid organ development                             | GO_BiologicalProcess-EBI-UniProt-GOA-ACAP-ARAP_08.05.2020_00h00 | 8,8905E-07 | 1,89019E-05 | 1,5032E-11 | 3,7957E-10 | [3, 4, 5, 6]       | Group104 | 7,16  | 72,00  |
| GO:0072359 | circulatory system development                                          | GO_BiologicalProcess-EBI-UniProt-GOA-ACAP-ARAP_08.05.2020_00h00 | 0,00149302 | 0,01123211  | 1,5032E-11 | 3,7957E-10 | [4, 5]             | Group104 | 5,75  | 67,00  |
| GO:0006259 | DNA metabolic process                                                   | GO_BiologicalProcess-EBI-UniProt-GOA-ACAP-ARAP_08.05.2020_00h00 | 4,5874E-07 | 1,01965E-05 | 1,5032E-11 | 3,7957E-10 | [4, 5, 6]          | Group104 | 7,26  | 73,00  |
| GO:0006325 | chromatin organization                                                  | GO_BiologicalProcess-EBI-UniProt-GOA-ACAP-ARAP_08.05.2020_00h00 | 2,6725E-13 | 7,84126E-11 | 1,5032E-11 | 3,7957E-10 | [4, 6]             | Group104 | 9,48  | 81,00  |
| GO:0010558 | negative regulation of macromolecule biosynthetic process               | GO_BiologicalProcess-EBI-UniProt-GOA-ACAP-ARAP_08.05.2020_00h00 | 1,1945E-09 | 9,223E-08   | 1,5032E-11 | 3,7957E-10 | [4, 5, 6]          | Group104 | 7,00  | 115,00 |
| GO:0010720 | positive regulation of cell development                                 | GO_BiologicalProcess-EBI-UniProt-GOA-ACAP-ARAP_08.05.2020_00h00 | 0,01184334 | 0,044209119 | 1,5032E-11 | 3,7957E-10 | [4, 5, 6]          | Group104 | 5,91  | 36,00  |
| GO:0016458 | gene silencing                                                          | GO_BiologicalProcess-EBI-UniProt-GOA-ACAP-ARAP_08.05.2020_00h00 | 3,1514E-12 | 7,70521E-10 | 1,5032E-11 | 3,7957E-10 | [2, 5, 6, 7]       | Group104 | 14,39 | 39,00  |
| GO:0030334 | regulation of cell migration                                            | GO_BiologicalProcess-EBI-UniProt-GOA-ACAP-ARAP_08.05.2020_00h00 | 0,01196401 | 0,044209588 | 1,5032E-11 | 3,7957E-10 | [4, 5, 6]          | Group104 | 5,50  | 51,00  |
| GO:0045934 | negative regulation of nucleobase-containing compound metabolic process | GO_BiologicalProcess-EBI-UniProt-GOA-ACAP-ARAP_08.05.2020_00h00 | 9,9987E-09 | 4,19088E-07 | 1,5032E-11 | 3,7957E-10 | [4, 5, 6]          | Group104 | 6,85  | 110,00 |
| GO:0051276 | chromosome organization                                                 | GO_BiologicalProcess-EBI-UniProt-GOA-ACAP-ARAP_08.05.2020_00h00 | 7,9756E-12 | 1,30003E-09 | 1,5032E-11 | 3,7957E-10 | [5]                | Group104 | 7,92  | 104,00 |
| GO:0065003 | protein-containing complex assembly                                     | GO_BiologicalProcess-EBI-UniProt-GOA-ACAP-ARAP_08.05.2020_00h00 | 1,2949E-09 | 9,04551E-08 | 1,5032E-11 | 3,7957E-10 | [5]                | Group104 | 6,87  | 121,00 |
| GO:0071824 | protein-DNA complex subunit organization                                | GO_BiologicalProcess-EBI-UniProt-GOA-ACAP-ARAP_08.05.2020_00h00 | 2,5592E-09 | 1,29459E-07 | 1,5032E-11 | 3,7957E-10 | [5]                | Group104 | 11,94 | 37,00  |
| GO:0072358 | cardiovascular system development                                       | GO_BiologicalProcess-EBI-UniProt-GOA-ACAP-ARAP_08.05.2020_00h00 | 0,00195144 | 0,013964712 | 1,5032E-11 | 3,7957E-10 | [4, 5, 6]          | Group104 | 6,14  | 48,00  |
| GO:2001020 | regulation of response to DNA damage stimulus                           | GO_BiologicalProcess-EBI-UniProt-GOA-ACAP-ARAP_08.05.2020_00h00 | 0,0073145  | 0,032615103 | 1,5032E-11 | 3,7957E-10 | [4, 5, 6]          | Group104 | 7,53  | 18,00  |
| GO:0010608 | posttranscriptional regulation of gene expression                       | GO_BiologicalProcess-EBI-UniProt-GOA-ACAP-ARAP_08.05.2020_00h00 | 0,00093836 | 0,008445232 | 1,5032E-11 | 3,7957E-10 | [5, 6]             | Group104 | 6,47  | 45,00  |
| GO:0030097 | hemopoiesis                                                             | GO_BiologicalProcess-EBI-UniProt-GOA-ACAP-ARAP_08.05.2020_00h00 | 1,4609E-06 | 2,9358E-05  | 1,5032E-11 | 3,7957E-10 | [4, 5, 6, 7]       | Group104 | 7,17  | 69,00  |
| GO:0040029 | regulation of gene expression, epigenetic                               | GO_BiologicalProcess-EBI-UniProt-GOA-ACAP-ARAP_08.05.2020_00h00 | 1,9685E-14 | 7,21956E-12 | 1,5032E-11 | 3,7957E-10 | [5, 6]             | Group104 | 14,12 | 48,00  |
| GO:0060968 | regulation of gene silencing                                            | GO_BiologicalProcess-EBI-UniProt-GOA-ACAP-ARAP_08.05.2020_00h00 | 4,5206E-08 | 1,50719E-06 | 1,5032E-11 | 3,7957E-10 | [3, 4, 5, 6, 7, 8] | Group104 | 15,49 | 22,00  |
| GO:1903706 | regulation of hemopoiesis                                               | GO_BiologicalProcess-EBI-UniProt-GOA-ACAP-ARAP_08.05.2020_00h00 | 6,525E-06  | 0,000110026 | 1,5032E-11 | 3,7957E-10 | [3, 4, 5, 6, 7, 8] | Group104 | 8,27  | 42,00  |
| GO:0000723 | telomere maintenance                                                    | GO_BiologicalProcess-EBI-UniProt-GOA-ACAP-ARAP_08.05.2020_00h00 | 0,00071636 | 0,00695961  | 1,5032E-11 | 3,7957E-10 | [5, 6, 7]          | Group104 | 9,60  | 17,00  |
| GO:0002521 | leukocyte differentiation                                               | GO_BiologicalProcess-EBI-UniProt-GOA-ACAP-ARAP_08.05.2020_00h00 | 0,00172079 | 0,012749455 | 1,5032E-11 | 3,7957E-10 | [4, 5, 6, 7, 8]    | Group104 | 6,63  | 37,00  |
| GO:0006281 | DNA repair                                                              | GO_BiologicalProcess-EBI-UniProt-GOA-ACAP-ARAP_08.05.2020_00h00 | 1,3176E-05 | 0,000210103 | 1,5032E-11 | 3,7957E-10 | [5, 6, 7]          | Group104 | 7,74  | 46,00  |

|            |                                                                    |                                                                 |            |             |            |            |                    |          |       |        |
|------------|--------------------------------------------------------------------|-----------------------------------------------------------------|------------|-------------|------------|------------|--------------------|----------|-------|--------|
| GO:0006333 | chromatin assembly or disassembly                                  | GO_BiologicalProcess-EBI-UniProt-GOA-ACAP-ARAP_08.05.2020_00h00 | 1,4678E-09 | 9,36214E-08 | 1,5032E-11 | 3,7957E-10 | [5, 7]             | Group104 | 13,50 | 32,00  |
| GO:0006338 | chromatin remodeling                                               | GO_BiologicalProcess-EBI-UniProt-GOA-ACAP-ARAP_08.05.2020_00h00 | 3,8911E-07 | 8,78189E-06 | 1,5032E-11 | 3,7957E-10 | [5, 7]             | Group104 | 11,62 | 28,00  |
| GO:0030099 | myeloid cell differentiation                                       | GO_BiologicalProcess-EBI-UniProt-GOA-ACAP-ARAP_08.05.2020_00h00 | 3,1838E-06 | 5,6273E-05  | 1,5032E-11 | 3,7957E-10 | [4, 5, 6, 7, 8]    | Group104 | 8,80  | 39,00  |
| GO:0031047 | gene silencing by RNA                                              | GO_BiologicalProcess-EBI-UniProt-GOA-ACAP-ARAP_08.05.2020_00h00 | 0,00055964 | 0,005781624 | 1,5032E-11 | 3,7957E-10 | [3, 6, 7, 8]       | Group104 | 9,52  | 18,00  |
| GO:0032200 | telomere organization                                              | GO_BiologicalProcess-EBI-UniProt-GOA-ACAP-ARAP_08.05.2020_00h00 | 2,0731E-06 | 4,00159E-05 | 1,5032E-11 | 3,7957E-10 | [6]                | Group104 | 12,11 | 23,00  |
| GO:0034622 | cellular protein-containing complex assembly                       | GO_BiologicalProcess-EBI-UniProt-GOA-ACAP-ARAP_08.05.2020_00h00 | 2,9425E-07 | 7,07637E-06 | 1,5032E-11 | 3,7957E-10 | [6]                | Group104 | 7,07  | 81,00  |
| GO:0034728 | nucleosome organization                                            | GO_BiologicalProcess-EBI-UniProt-GOA-ACAP-ARAP_08.05.2020_00h00 | 3,468E-09  | 1,64113E-07 | 1,5032E-11 | 3,7957E-10 | [5, 6, 7]          | Group104 | 14,43 | 28,00  |
| GO:0038111 | interleukin-7-mediated signaling pathway                           | GO_BiologicalProcess-EBI-UniProt-GOA-ACAP-ARAP_08.05.2020_00h00 | 9,2259E-06 | 0,000150381 | 1,5032E-11 | 3,7957E-10 | [5, 6, 7]          | Group104 | 28,57 | 8,00   |
| GO:0045814 | negative regulation of gene expression, epigenetic                 | GO_BiologicalProcess-EBI-UniProt-GOA-ACAP-ARAP_08.05.2020_00h00 | 5,7268E-20 | 4,20059E-17 | 1,5032E-11 | 3,7957E-10 | [5, 6, 7]          | Group104 | 28,10 | 34,00  |
| GO:0051253 | negative regulation of RNA metabolic process                       | GO_BiologicalProcess-EBI-UniProt-GOA-ACAP-ARAP_08.05.2020_00h00 | 1,6995E-09 | 9,97274E-08 | 1,5032E-11 | 3,7957E-10 | [4, 5, 6, 7, 8]    | Group104 | 7,14  | 107,00 |
| GO:0071103 | DNA conformation change                                            | GO_BiologicalProcess-EBI-UniProt-GOA-ACAP-ARAP_08.05.2020_00h00 | 6,4405E-08 | 1,88965E-06 | 1,5032E-11 | 3,7957E-10 | [6]                | Group104 | 10,26 | 39,00  |
| GO:1901342 | regulation of vasculature development                              | GO_BiologicalProcess-EBI-UniProt-GOA-ACAP-ARAP_08.05.2020_00h00 | 0,01138038 | 0,043590143 | 1,5032E-11 | 3,7957E-10 | [4, 5, 6, 7, 8]    | Group104 | 6,58  | 24,00  |
| GO:2000113 | negative regulation of cellular macromolecule biosynthetic process | GO_BiologicalProcess-EBI-UniProt-GOA-ACAP-ARAP_08.05.2020_00h00 | 1,8643E-09 | 9,76766E-08 | 1,5032E-11 | 3,7957E-10 | [5, 6, 7]          | Group104 | 7,06  | 110,00 |
| GO:0030098 | lymphocyte differentiation                                         | GO_BiologicalProcess-EBI-UniProt-GOA-ACAP-ARAP_08.05.2020_00h00 | 0,00987359 | 0,039683726 | 1,5032E-11 | 3,7957E-10 | [4, 5, 6, 7, 8, 9] | Group104 | 6,58  | 25,00  |
| GO:0045637 | regulation of myeloid cell differentiation                         | GO_BiologicalProcess-EBI-UniProt-GOA-ACAP-ARAP_08.05.2020_00h00 | 6,4388E-05 | 0,000874597 | 1,5032E-11 | 3,7957E-10 | [4, 5, 6, 7, 8, 9] | Group104 | 9,40  | 25,00  |
| GO:0048514 | blood vessel morphogenesis                                         | GO_BiologicalProcess-EBI-UniProt-GOA-ACAP-ARAP_08.05.2020_00h00 | 0,00257482 | 0,016787833 | 1,5032E-11 | 3,7957E-10 | [4, 5, 6, 7, 8, 9] | Group104 | 6,30  | 41,00  |
| GO:0050769 | positive regulation of neurogenesis                                | GO_BiologicalProcess-EBI-UniProt-GOA-ACAP-ARAP_08.05.2020_00h00 | 0,0070058  | 0,03172072  | 1,5032E-11 | 3,7957E-10 | [4, 5, 6, 7, 8, 9] | Group104 | 6,26  | 33,00  |
| GO:0065004 | protein-DNA complex assembly                                       | GO_BiologicalProcess-EBI-UniProt-GOA-ACAP-ARAP_08.05.2020_00h00 | 2,7077E-10 | 2,8373E-08  | 1,5032E-11 | 3,7957E-10 | [6, 7]             | Group104 | 13,46 | 35,00  |
| GO:0000726 | non-recombinational repair                                         | GO_BiologicalProcess-EBI-UniProt-GOA-ACAP-ARAP_08.05.2020_00h00 | 3,3384E-05 | 0,000484896 | 1,5032E-11 | 3,7957E-10 | [6, 7, 8]          | Group104 | 13,51 | 15,00  |
| GO:0006302 | double-strand break repair                                         | GO_BiologicalProcess-EBI-UniProt-GOA-ACAP-ARAP_08.05.2020_00h00 | 1,8599E-05 | 0,000281284 | 1,5032E-11 | 3,7957E-10 | [6, 7, 8]          | Group104 | 9,71  | 27,00  |
| GO:0006323 | DNA packaging                                                      | GO_BiologicalProcess-EBI-UniProt-GOA-ACAP-ARAP_08.05.2020_00h00 | 1,2977E-09 | 8,65349E-08 | 1,5032E-11 | 3,7957E-10 | [7]                | Group104 | 12,98 | 34,00  |
| GO:0016233 | telomere capping                                                   | GO_BiologicalProcess-EBI-UniProt-GOA-ACAP-ARAP_08.05.2020_00h00 | 0,002222   | 0,015232097 | 1,5032E-11 | 3,7957E-10 | [6, 7, 8]          | Group104 | 13,56 | 8,00   |
| GO:0016570 | histone modification                                               | GO_BiologicalProcess-EBI-UniProt-GOA-ACAP-ARAP_08.05.2020_00h00 | 0,00012397 | 0,00150305  | 1,5032E-11 | 3,7957E-10 | [6, 7, 8]          | Group104 | 7,63  | 37,00  |
| GO:0030219 | megakaryocyte differentiation                                      | GO_BiologicalProcess-EBI-UniProt-GOA-ACAP-ARAP_08.05.2020_00h00 | 3,3816E-07 | 8,00123E-06 | 1,5032E-11 | 3,7957E-10 | [5, 6, 7, 8, 9]    | Group104 | 17,17 | 17,00  |

|            |                                                                         |                                                                 |            |             |            |            |                                        |          |       |        |
|------------|-------------------------------------------------------------------------|-----------------------------------------------------------------|------------|-------------|------------|------------|----------------------------------------|----------|-------|--------|
| GO:0006334 | nucleosome assembly                                                     | GO_BiologicalProcess-EBI-UniProt-GOA-ACAP-ARAP_08.05.2020_00h00 | 7,4995E-10 | 6,47167E-08 | 1,5032E-11 | 3,7957E-10 | [6, 7, 8, 9]                           | Group104 | 17,01 | 25,00  |
| GO:0018205 | peptidyl-lysine modification                                            | GO_BiologicalProcess-EBI-UniProt-GOA-ACAP-ARAP_08.05.2020_00h00 | 2,6372E-06 | 4,83594E-05 | 1,5032E-11 | 3,7957E-10 | [7, 8]                                 | Group104 | 8,98  | 38,00  |
| GO:0045652 | regulation of megakaryocyte differentiation                             | GO_BiologicalProcess-EBI-UniProt-GOA-ACAP-ARAP_08.05.2020_00h00 | 2,8934E-06 | 5,17628E-05 | 1,5032E-11 | 3,7957E-10 | [5, 6, 7, 8, 9, 10]                    | Group104 | 17,50 | 14,00  |
| GO:0034401 | chromatin organization involved in regulation of transcription          | GO_BiologicalProcess-EBI-UniProt-GOA-ACAP-ARAP_08.05.2020_00h00 | 6,8998E-21 | 1,0122E-17  | 1,5032E-11 | 3,7957E-10 | [5, 6, 7, 8, 9, 10, 11]                | Group104 | 24,54 | 40,00  |
| GO:0035195 | gene silencing by miRNA                                                 | GO_BiologicalProcess-EBI-UniProt-GOA-ACAP-ARAP_08.05.2020_00h00 | 0,00011795 | 0,001441976 | 1,5032E-11 | 3,7957E-10 | [5, 8, 9, 10]                          | Group104 | 11,18 | 17,00  |
| GO:0045653 | negative regulation of megakaryocyte differentiation                    | GO_BiologicalProcess-EBI-UniProt-GOA-ACAP-ARAP_08.05.2020_00h00 | 4,7735E-05 | 0,000660629 | 1,5032E-11 | 3,7957E-10 | [5, 6, 7, 8, 9, 10, 11]                | Group104 | 33,33 | 6,00   |
| GO:0045892 | negative regulation of transcription, DNA-templated                     | GO_BiologicalProcess-EBI-UniProt-GOA-ACAP-ARAP_08.05.2020_00h00 | 1,4756E-09 | 9,01966E-08 | 1,5032E-11 | 3,7957E-10 | [5, 6, 7, 8, 9, 10, 11]                | Group104 | 7,37  | 99,00  |
| GO:0060964 | regulation of gene silencing by miRNA                                   | GO_BiologicalProcess-EBI-UniProt-GOA-ACAP-ARAP_08.05.2020_00h00 | 1,7641E-05 | 0,000269584 | 1,5032E-11 | 3,7957E-10 | [5, 6, 7, 8, 9, 10, 11]                | Group104 | 13,56 | 16,00  |
| GO:1903507 | negative regulation of nucleic acid-templated transcription             | GO_BiologicalProcess-EBI-UniProt-GOA-ACAP-ARAP_08.05.2020_00h00 | 2,9412E-10 | 2,87649E-08 | 1,5032E-11 | 3,7957E-10 | [6, 7, 8, 9, 10]                       | Group104 | 7,44  | 104,00 |
| GO:0006335 | DNA replication-dependent nucleosome assembly                           | GO_BiologicalProcess-EBI-UniProt-GOA-ACAP-ARAP_08.05.2020_00h00 | 2,1962E-08 | 8,26103E-07 | 1,5032E-11 | 3,7957E-10 | [7, 8, 9, 10]                          | Group104 | 34,38 | 11,00  |
| GO:0034080 | CENP-A containing nucleosome assembly                                   | GO_BiologicalProcess-EBI-UniProt-GOA-ACAP-ARAP_08.05.2020_00h00 | 0,00185713 | 0,013554285 | 1,5032E-11 | 3,7957E-10 | [6, 7, 8, 9, 10, 11]                   | Group104 | 15,56 | 7,00   |
| GO:0006342 | chromatin silencing                                                     | GO_BiologicalProcess-EBI-UniProt-GOA-ACAP-ARAP_08.05.2020_00h00 | 5,9328E-12 | 1,08793E-09 | 1,5032E-11 | 3,7957E-10 | [3, 6, 7, 8, 9, 10, 11, 12, 13]        | Group104 | 27,03 | 20,00  |
| GO:0031935 | regulation of chromatin silencing                                       | GO_BiologicalProcess-EBI-UniProt-GOA-ACAP-ARAP_08.05.2020_00h00 | 9,3095E-05 | 0,001167273 | 1,5032E-11 | 3,7957E-10 | [4, 5, 6, 7, 8, 9, 10, 11, 12, 13, 14] | Group104 | 30,00 | 6,00   |
| GO:0097549 | chromatin organization involved in negative regulation of transcription | GO_BiologicalProcess-EBI-UniProt-GOA-ACAP-ARAP_08.05.2020_00h00 | 1,0992E-18 | 5,37508E-16 | 1,5032E-11 | 3,7957E-10 | [6, 7, 8, 9, 10, 11, 12]               | Group104 | 24,16 | 36,00  |
| GO:0031507 | heterochromatin assembly                                                | GO_BiologicalProcess-EBI-UniProt-GOA-ACAP-ARAP_08.05.2020_00h00 | 2,7094E-09 | 1,32488E-07 | 1,5032E-11 | 3,7957E-10 | [6, 7, 8, 9, 10, 11, 12, 13]           | Group104 | 21,95 | 18,00  |
| GO:0048518 | positive regulation of biological process                               | GO_BiologicalProcess-EBI-UniProt-GOA-ACAP-ARAP_08.05.2020_00h00 | 0,00105434 | 0,00899257  | 3,8786E-11 | 7,8348E-10 | [1, 2, 3]                              | Group105 | 4,59  | 301,00 |
| GO:0048519 | negative regulation of biological process                               | GO_BiologicalProcess-EBI-UniProt-GOA-ACAP-ARAP_08.05.2020_00h00 | 1,6627E-08 | 6,41897E-07 | 3,8786E-11 | 7,8348E-10 | [1, 2, 3]                              | Group105 | 5,20  | 299,00 |
| GO:0019222 | regulation of metabolic process                                         | GO_BiologicalProcess-EBI-UniProt-GOA-ACAP-ARAP_08.05.2020_00h00 | 0,00015854 | 0,001875573 | 3,8786E-11 | 7,8348E-10 | [2, 3]                                 | Group105 | 4,63  | 338,00 |
| GO:0003676 | nucleic acid binding                                                    | GO_MolecularFunction-EBI-UniProt-GOA-ACAP-ARAP_08.05.2020_00h00 | 8,2827E-06 | 0,000136525 | 3,8786E-11 | 7,8348E-10 | [3]                                    | Group105 | 5,15  | 220,00 |
| GO:0006725 | cellular aromatic compound metabolic process                            | GO_BiologicalProcess-EBI-UniProt-GOA-ACAP-ARAP_08.05.2020_00h00 | 1,2125E-07 | 3,23404E-06 | 3,8786E-11 | 7,8348E-10 | [3]                                    | Group105 | 5,07  | 309,00 |
| GO:0008134 | transcription factor binding                                            | GO_MolecularFunction-EBI-UniProt-GOA-ACAP-ARAP_08.05.2020_00h00 | 1,4931E-05 | 0,00023302  | 3,8786E-11 | 7,8348E-10 | [3]                                    | Group105 | 7,31  | 53,00  |
| GO:0009892 | negative regulation of metabolic process                                | GO_BiologicalProcess-EBI-UniProt-GOA-ACAP-ARAP_08.05.2020_00h00 | 1,4233E-07 | 3,66315E-06 | 3,8786E-11 | 7,8348E-10 | [2, 3, 4]                              | Group105 | 5,62  | 191,00 |
| GO:0009893 | positive regulation of metabolic process                                | GO_BiologicalProcess-EBI-UniProt-GOA-ACAP-ARAP_08.05.2020_00h00 | 0,0014638  | 0,011126414 | 3,8786E-11 | 7,8348E-10 | [2, 3, 4]                              | Group105 | 4,81  | 197,00 |

|            |                                                   |                                                                 |            |             |            |            |           |          |      |        |
|------------|---------------------------------------------------|-----------------------------------------------------------------|------------|-------------|------------|------------|-----------|----------|------|--------|
| GO:0034641 | cellular nitrogen compound metabolic process      | GO_BiologicalProcess-EBI-UniProt-GOA-ACAP-ARAP_08.05.2020_00h00 | 1,1688E-07 | 3,17519E-06 | 3,8786E-11 | 7,8348E-10 | [3]       | Group105 | 5,00 | 331,00 |
| GO:0043170 | macromolecule metabolic process                   | GO_BiologicalProcess-EBI-UniProt-GOA-ACAP-ARAP_08.05.2020_00h00 | 8,5739E-07 | 1,8497E-05  | 3,8786E-11 | 7,8348E-10 | [3]       | Group105 | 4,63 | 455,00 |
| GO:0044249 | cellular biosynthetic process                     | GO_BiologicalProcess-EBI-UniProt-GOA-ACAP-ARAP_08.05.2020_00h00 | 1,1763E-10 | 1,56875E-08 | 3,8786E-11 | 7,8348E-10 | [3]       | Group105 | 5,28 | 333,00 |
| GO:0046483 | heterocycle metabolic process                     | GO_BiologicalProcess-EBI-UniProt-GOA-ACAP-ARAP_08.05.2020_00h00 | 5,3072E-08 | 1,69254E-06 | 3,8786E-11 | 7,8348E-10 | [3]       | Group105 | 5,11 | 309,00 |
| GO:0048522 | positive regulation of cellular process           | GO_BiologicalProcess-EBI-UniProt-GOA-ACAP-ARAP_08.05.2020_00h00 | 6,6865E-05 | 0,000899924 | 3,8786E-11 | 7,8348E-10 | [2, 3, 4] | Group105 | 4,80 | 286,00 |
| GO:0048523 | negative regulation of cellular process           | GO_BiologicalProcess-EBI-UniProt-GOA-ACAP-ARAP_08.05.2020_00h00 | 1,144E-08  | 4,66176E-07 | 3,8786E-11 | 7,8348E-10 | [2, 3, 4] | Group105 | 5,32 | 275,00 |
| GO:0048584 | positive regulation of response to stimulus       | GO_BiologicalProcess-EBI-UniProt-GOA-ACAP-ARAP_08.05.2020_00h00 | 0,00860397 | 0,036691941 | 3,8786E-11 | 7,8348E-10 | [2, 3, 4] | Group105 | 4,86 | 126,00 |
| GO:1901360 | organic cyclic compound metabolic process         | GO_BiologicalProcess-EBI-UniProt-GOA-ACAP-ARAP_08.05.2020_00h00 | 9,4412E-07 | 1,95074E-05 | 3,8786E-11 | 7,8348E-10 | [3]       | Group105 | 4,95 | 314,00 |
| GO:1901564 | organonitrogen compound metabolic process         | GO_BiologicalProcess-EBI-UniProt-GOA-ACAP-ARAP_08.05.2020_00h00 | 1,8206E-06 | 3,56114E-05 | 3,8786E-11 | 7,8348E-10 | [3]       | Group105 | 4,85 | 342,00 |
| GO:1901576 | organic substance biosynthetic process            | GO_BiologicalProcess-EBI-UniProt-GOA-ACAP-ARAP_08.05.2020_00h00 | 3,7644E-10 | 3,45146E-08 | 3,8786E-11 | 7,8348E-10 | [3]       | Group105 | 5,23 | 335,00 |
| GO:0006139 | nucleobase-containing compound metabolic process  | GO_BiologicalProcess-EBI-UniProt-GOA-ACAP-ARAP_08.05.2020_00h00 | 2,5057E-08 | 9,18966E-07 | 3,8786E-11 | 7,8348E-10 | [3, 4]    | Group105 | 5,16 | 303,00 |
| GO:0009889 | regulation of biosynthetic process                | GO_BiologicalProcess-EBI-UniProt-GOA-ACAP-ARAP_08.05.2020_00h00 | 2,7732E-06 | 5,02265E-05 | 3,8786E-11 | 7,8348E-10 | [3, 4]    | Group105 | 5,17 | 233,00 |
| GO:0019538 | protein metabolic process                         | GO_BiologicalProcess-EBI-UniProt-GOA-ACAP-ARAP_08.05.2020_00h00 | 8,5578E-05 | 0,001091683 | 3,8786E-11 | 7,8348E-10 | [3, 4]    | Group105 | 4,77 | 290,00 |
| GO:0031323 | regulation of cellular metabolic process          | GO_BiologicalProcess-EBI-UniProt-GOA-ACAP-ARAP_08.05.2020_00h00 | 6,7258E-05 | 0,000896979 | 3,8786E-11 | 7,8348E-10 | [3, 4]    | Group105 | 4,74 | 311,00 |
| GO:0044260 | cellular macromolecule metabolic process          | GO_BiologicalProcess-EBI-UniProt-GOA-ACAP-ARAP_08.05.2020_00h00 | 8,6487E-08 | 2,43993E-06 | 3,8786E-11 | 7,8348E-10 | [3, 4]    | Group105 | 4,80 | 411,00 |
| GO:0051171 | regulation of nitrogen compound metabolic process | GO_BiologicalProcess-EBI-UniProt-GOA-ACAP-ARAP_08.05.2020_00h00 | 0,00052879 | 0,005540913 | 3,8786E-11 | 7,8348E-10 | [3, 4]    | Group105 | 4,66 | 287,00 |
| GO:0060255 | regulation of macromolecule metabolic process     | GO_BiologicalProcess-EBI-UniProt-GOA-ACAP-ARAP_08.05.2020_00h00 | 0,00033958 | 0,003690134 | 3,8786E-11 | 7,8348E-10 | [3, 4]    | Group105 | 4,64 | 312,00 |
| GO:0080090 | regulation of primary metabolic process           | GO_BiologicalProcess-EBI-UniProt-GOA-ACAP-ARAP_08.05.2020_00h00 | 0,00023645 | 0,002709926 | 3,8786E-11 | 7,8348E-10 | [3, 4]    | Group105 | 4,69 | 298,00 |
| GO:0003677 | DNA binding                                       | GO_MolecularFunction-EBI-UniProt-GOA-ACAP-ARAP_08.05.2020_00h00 | 2,631E-05  | 0,00038987  | 3,8786E-11 | 7,8348E-10 | [4]       | Group105 | 5,47 | 146,00 |
| GO:0003723 | RNA binding                                       | GO_MolecularFunction-EBI-UniProt-GOA-ACAP-ARAP_08.05.2020_00h00 | 0,00594192 | 0,02895944  | 3,8786E-11 | 7,8348E-10 | [4]       | Group105 | 5,16 | 90,00  |
| GO:0009059 | macromolecule biosynthetic process                | GO_BiologicalProcess-EBI-UniProt-GOA-ACAP-ARAP_08.05.2020_00h00 | 1,3333E-08 | 5,28628E-07 | 3,8786E-11 | 7,8348E-10 | [4]       | Group105 | 5,30 | 277,00 |
| GO:0009890 | negative regulation of biosynthetic process       | GO_BiologicalProcess-EBI-UniProt-GOA-ACAP-ARAP_08.05.2020_00h00 | 4,8092E-09 | 2,07501E-07 | 3,8786E-11 | 7,8348E-10 | [3, 4, 5] | Group105 | 6,77 | 118,00 |
| GO:0009891 | positive regulation of biosynthetic process       | GO_BiologicalProcess-EBI-UniProt-GOA-ACAP-ARAP_08.05.2020_00h00 | 0,00021445 | 0,002496809 | 3,8786E-11 | 7,8348E-10 | [3, 4, 5] | Group105 | 5,43 | 120,00 |
| GO:0010467 | gene expression                                   | GO_BiologicalProcess-EBI-UniProt-GOA-ACAP-ARAP_08.05.2020_00h00 | 3,6187E-05 | 0,000515404 | 3,8786E-11 | 7,8348E-10 | [4]       | Group105 | 4,83 | 289,00 |

|            |                                                                |                                                                 |            |             |            |            |           |          |      |        |
|------------|----------------------------------------------------------------|-----------------------------------------------------------------|------------|-------------|------------|------------|-----------|----------|------|--------|
| GO:0010604 | positive regulation of macromolecule metabolic process         | GO_BiologicalProcess-EBI-UniProt-GOA-ACAP-ARAP_08.05.2020_00h00 | 0,00104636 | 0,009029456 | 3,8786E-11 | 7,8348E-10 | [3, 4, 5] | Group105 | 4,88 | 185,00 |
| GO:0010605 | negative regulation of macromolecule metabolic process         | GO_BiologicalProcess-EBI-UniProt-GOA-ACAP-ARAP_08.05.2020_00h00 | 5,4703E-08 | 1,70742E-06 | 3,8786E-11 | 7,8348E-10 | [3, 4, 5] | Group105 | 5,77 | 180,00 |
| GO:0018130 | heterocycle biosynthetic process                               | GO_BiologicalProcess-EBI-UniProt-GOA-ACAP-ARAP_08.05.2020_00h00 | 7,8445E-10 | 6,39326E-08 | 3,8786E-11 | 7,8348E-10 | [4]       | Group105 | 5,60 | 247,00 |
| GO:0019438 | aromatic compound biosynthetic process                         | GO_BiologicalProcess-EBI-UniProt-GOA-ACAP-ARAP_08.05.2020_00h00 | 1,8552E-09 | 1,00801E-07 | 3,8786E-11 | 7,8348E-10 | [4]       | Group105 | 5,56 | 246,00 |
| GO:0031324 | negative regulation of cellular metabolic process              | GO_BiologicalProcess-EBI-UniProt-GOA-ACAP-ARAP_08.05.2020_00h00 | 3,2119E-08 | 1,12185E-06 | 3,8786E-11 | 7,8348E-10 | [3, 4, 5] | Group105 | 5,94 | 166,00 |
| GO:0031325 | positive regulation of cellular metabolic process              | GO_BiologicalProcess-EBI-UniProt-GOA-ACAP-ARAP_08.05.2020_00h00 | 0,00059574 | 0,005985978 | 3,8786E-11 | 7,8348E-10 | [3, 4, 5] | Group105 | 4,96 | 179,00 |
| GO:0043412 | macromolecule modification                                     | GO_BiologicalProcess-EBI-UniProt-GOA-ACAP-ARAP_08.05.2020_00h00 | 0,00093585 | 0,008527306 | 3,8786E-11 | 7,8348E-10 | [4]       | Group105 | 4,78 | 220,00 |
| GO:0044271 | cellular nitrogen compound biosynthetic process                | GO_BiologicalProcess-EBI-UniProt-GOA-ACAP-ARAP_08.05.2020_00h00 | 1,3139E-10 | 1,60621E-08 | 3,8786E-11 | 7,8348E-10 | [4]       | Group105 | 5,52 | 280,00 |
| GO:0051172 | negative regulation of nitrogen compound metabolic process     | GO_BiologicalProcess-EBI-UniProt-GOA-ACAP-ARAP_08.05.2020_00h00 | 6,0798E-08 | 1,82022E-06 | 3,8786E-11 | 7,8348E-10 | [3, 4, 5] | Group105 | 6,00 | 154,00 |
| GO:0051173 | positive regulation of nitrogen compound metabolic process     | GO_BiologicalProcess-EBI-UniProt-GOA-ACAP-ARAP_08.05.2020_00h00 | 0,00064401 | 0,006426958 | 3,8786E-11 | 7,8348E-10 | [3, 4, 5] | Group105 | 4,99 | 171,00 |
| GO:1901362 | organic cyclic compound biosynthetic process                   | GO_BiologicalProcess-EBI-UniProt-GOA-ACAP-ARAP_08.05.2020_00h00 | 4,7312E-09 | 2,10323E-07 | 3,8786E-11 | 7,8348E-10 | [4]       | Group105 | 5,48 | 251,00 |
| GO:0010468 | regulation of gene expression                                  | GO_BiologicalProcess-EBI-UniProt-GOA-ACAP-ARAP_08.05.2020_00h00 | 0,00010021 | 0,001235371 | 3,8786E-11 | 7,8348E-10 | [4, 5]    | Group105 | 4,88 | 247,00 |
| GO:0010556 | regulation of macromolecule biosynthetic process               | GO_BiologicalProcess-EBI-UniProt-GOA-ACAP-ARAP_08.05.2020_00h00 | 6,0315E-06 | 0,000102886 | 3,8786E-11 | 7,8348E-10 | [4, 5]    | Group105 | 5,18 | 220,00 |
| GO:0019219 | regulation of nucleobase-containing compound metabolic process | GO_BiologicalProcess-EBI-UniProt-GOA-ACAP-ARAP_08.05.2020_00h00 | 0,00014047 | 0,001689125 | 3,8786E-11 | 7,8348E-10 | [4, 5]    | Group105 | 4,97 | 210,00 |
| GO:0031326 | regulation of cellular biosynthetic process                    | GO_BiologicalProcess-EBI-UniProt-GOA-ACAP-ARAP_08.05.2020_00h00 | 4,6178E-06 | 7,9698E-05  | 3,8786E-11 | 7,8348E-10 | [4, 5]    | Group105 | 5,16 | 228,00 |
| GO:0034645 | cellular macromolecule biosynthetic process                    | GO_BiologicalProcess-EBI-UniProt-GOA-ACAP-ARAP_08.05.2020_00h00 | 8,1257E-08 | 2,33734E-06 | 3,8786E-11 | 7,8348E-10 | [4, 5]    | Group105 | 5,25 | 266,00 |
| GO:0034654 | nucleobase-containing compound biosynthetic process            | GO_BiologicalProcess-EBI-UniProt-GOA-ACAP-ARAP_08.05.2020_00h00 | 1,2782E-09 | 9,37542E-08 | 3,8786E-11 | 7,8348E-10 | [4, 5]    | Group105 | 5,60 | 243,00 |
| GO:0044267 | cellular protein metabolic process                             | GO_BiologicalProcess-EBI-UniProt-GOA-ACAP-ARAP_08.05.2020_00h00 | 2,264E-06  | 4,31332E-05 | 3,8786E-11 | 7,8348E-10 | [4, 5]    | Group105 | 5,03 | 275,00 |
| GO:0051246 | regulation of protein metabolic process                        | GO_BiologicalProcess-EBI-UniProt-GOA-ACAP-ARAP_08.05.2020_00h00 | 0,00302843 | 0,018588707 | 3,8786E-11 | 7,8348E-10 | [4, 5]    | Group105 | 4,91 | 148,00 |
| GO:0090304 | nucleic acid metabolic process                                 | GO_BiologicalProcess-EBI-UniProt-GOA-ACAP-ARAP_08.05.2020_00h00 | 3,5913E-07 | 8,232E-06   | 3,8786E-11 | 7,8348E-10 | [4, 5]    | Group105 | 5,14 | 273,00 |
| GO:0003690 | double-stranded DNA binding                                    | GO_MolecularFunction-EBI-UniProt-GOA-ACAP-ARAP_08.05.2020_00h00 | 0,01251934 | 0,045460086 | 3,8786E-11 | 7,8348E-10 | [5]       | Group105 | 5,29 | 63,00  |
| GO:0006325 | chromatin organization                                         | GO_BiologicalProcess-EBI-UniProt-GOA-ACAP-ARAP_08.05.2020_00h00 | 2,6725E-13 | 7,84126E-11 | 3,8786E-11 | 7,8348E-10 | [4, 6]    | Group105 | 9,48 | 81,00  |
| GO:0010557 | positive regulation of macromolecule biosynthetic process      | GO_BiologicalProcess-EBI-UniProt-GOA-ACAP-ARAP_08.05.2020_00h00 | 8,2418E-05 | 0,001060587 | 3,8786E-11 | 7,8348E-10 | [4, 5, 6] | Group105 | 5,60 | 116,00 |

|            |                                                                         |                                                                 |            |             |            |            |                     |          |       |        |
|------------|-------------------------------------------------------------------------|-----------------------------------------------------------------|------------|-------------|------------|------------|---------------------|----------|-------|--------|
| GO:0010558 | negative regulation of macromolecule biosynthetic process               | GO_BiologicalProcess-EBI-UniProt-GOA-ACAP-ARAP_08.05.2020_00h00 | 1,1945E-09 | 9,223E-08   | 3,8786E-11 | 7,8348E-10 | [4, 5, 6]           | Group105 | 7,00  | 115,00 |
| GO:0010629 | negative regulation of gene expression                                  | GO_BiologicalProcess-EBI-UniProt-GOA-ACAP-ARAP_08.05.2020_00h00 | 2,5845E-08 | 9,24739E-07 | 3,8786E-11 | 7,8348E-10 | [4, 5, 6]           | Group105 | 6,23  | 141,00 |
| GO:0016458 | gene silencing                                                          | GO_BiologicalProcess-EBI-UniProt-GOA-ACAP-ARAP_08.05.2020_00h00 | 3,1514E-12 | 7,70521E-10 | 3,8786E-11 | 7,8348E-10 | [2, 5, 6, 7]        | Group105 | 14,39 | 39,00  |
| GO:0032268 | regulation of cellular protein metabolic process                        | GO_BiologicalProcess-EBI-UniProt-GOA-ACAP-ARAP_08.05.2020_00h00 | 0,00110744 | 0,009230763 | 3,8786E-11 | 7,8348E-10 | [4, 5, 6]           | Group105 | 5,06  | 143,00 |
| GO:0045934 | negative regulation of nucleobase-containing compound metabolic process | GO_BiologicalProcess-EBI-UniProt-GOA-ACAP-ARAP_08.05.2020_00h00 | 9,9987E-09 | 4,19088E-07 | 3,8786E-11 | 7,8348E-10 | [4, 5, 6]           | Group105 | 6,85  | 110,00 |
| GO:0045935 | positive regulation of nucleobase-containing compound metabolic process | GO_BiologicalProcess-EBI-UniProt-GOA-ACAP-ARAP_08.05.2020_00h00 | 0,00017084 | 0,002004963 | 3,8786E-11 | 7,8348E-10 | [4, 5, 6]           | Group105 | 5,53  | 113,00 |
| GO:0051276 | chromosome organization                                                 | GO_BiologicalProcess-EBI-UniProt-GOA-ACAP-ARAP_08.05.2020_00h00 | 7,9756E-12 | 1,30003E-09 | 3,8786E-11 | 7,8348E-10 | [5]                 | Group105 | 7,92  | 104,00 |
| GO:0006464 | cellular protein modification process                                   | GO_BiologicalProcess-EBI-UniProt-GOA-ACAP-ARAP_08.05.2020_00h00 | 0,00113649 | 0,00941937  | 3,8786E-11 | 7,8348E-10 | [5, 6]              | Group105 | 4,79  | 210,00 |
| GO:0016070 | RNA metabolic process                                                   | GO_BiologicalProcess-EBI-UniProt-GOA-ACAP-ARAP_08.05.2020_00h00 | 3,4994E-07 | 8,1486E-06  | 3,8786E-11 | 7,8348E-10 | [5, 6]              | Group105 | 5,23  | 251,00 |
| GO:0032270 | positive regulation of cellular protein metabolic process               | GO_BiologicalProcess-EBI-UniProt-GOA-ACAP-ARAP_08.05.2020_00h00 | 0,01391572 | 0,048955314 | 3,8786E-11 | 7,8348E-10 | [4, 5, 6, 7]        | Group105 | 5,02  | 86,00  |
| GO:0040029 | regulation of gene expression, epigenetic                               | GO_BiologicalProcess-EBI-UniProt-GOA-ACAP-ARAP_08.05.2020_00h00 | 1,9685E-14 | 7,21956E-12 | 3,8786E-11 | 7,8348E-10 | [5, 6]              | Group105 | 14,12 | 48,00  |
| GO:0051252 | regulation of RNA metabolic process                                     | GO_BiologicalProcess-EBI-UniProt-GOA-ACAP-ARAP_08.05.2020_00h00 | 3,255E-05  | 0,000477514 | 3,8786E-11 | 7,8348E-10 | [4, 5, 6, 7]        | Group105 | 5,13  | 202,00 |
| GO:2000112 | regulation of cellular macromolecule biosynthetic process               | GO_BiologicalProcess-EBI-UniProt-GOA-ACAP-ARAP_08.05.2020_00h00 | 1,5143E-05 | 0,000233845 | 3,8786E-11 | 7,8348E-10 | [5, 6]              | Group105 | 5,15  | 211,00 |
| GO:0031399 | regulation of protein modification process                              | GO_BiologicalProcess-EBI-UniProt-GOA-ACAP-ARAP_08.05.2020_00h00 | 0,00122922 | 0,009747351 | 3,8786E-11 | 7,8348E-10 | [5, 6, 7]           | Group105 | 5,31  | 105,00 |
| GO:0045814 | negative regulation of gene expression, epigenetic                      | GO_BiologicalProcess-EBI-UniProt-GOA-ACAP-ARAP_08.05.2020_00h00 | 5,7268E-20 | 4,20059E-17 | 3,8786E-11 | 7,8348E-10 | [5, 6, 7]           | Group105 | 28,10 | 34,00  |
| GO:0051253 | negative regulation of RNA metabolic process                            | GO_BiologicalProcess-EBI-UniProt-GOA-ACAP-ARAP_08.05.2020_00h00 | 1,6995E-09 | 9,97274E-08 | 3,8786E-11 | 7,8348E-10 | [4, 5, 6, 7, 8]     | Group105 | 7,14  | 107,00 |
| GO:0051254 | positive regulation of RNA metabolic process                            | GO_BiologicalProcess-EBI-UniProt-GOA-ACAP-ARAP_08.05.2020_00h00 | 0,0002428  | 0,002761146 | 3,8786E-11 | 7,8348E-10 | [4, 5, 6, 7, 8]     | Group105 | 5,57  | 104,00 |
| GO:2000113 | negative regulation of cellular macromolecule biosynthetic process      | GO_BiologicalProcess-EBI-UniProt-GOA-ACAP-ARAP_08.05.2020_00h00 | 1,8643E-09 | 9,76766E-08 | 3,8786E-11 | 7,8348E-10 | [5, 6, 7]           | Group105 | 7,06  | 110,00 |
| GO:0006351 | transcription, DNA-templated                                            | GO_BiologicalProcess-EBI-UniProt-GOA-ACAP-ARAP_08.05.2020_00h00 | 9,1187E-07 | 1,91103E-05 | 3,8786E-11 | 7,8348E-10 | [5, 6, 7, 8, 9]     | Group105 | 5,40  | 203,00 |
| GO:0097659 | nucleic acid-templated transcription                                    | GO_BiologicalProcess-EBI-UniProt-GOA-ACAP-ARAP_08.05.2020_00h00 | 1,822E-07  | 4,53027E-06 | 3,8786E-11 | 7,8348E-10 | [6, 7, 8]           | Group105 | 5,48  | 209,00 |
| GO:0006355 | regulation of transcription, DNA-templated                              | GO_BiologicalProcess-EBI-UniProt-GOA-ACAP-ARAP_08.05.2020_00h00 | 7,2213E-06 | 0,000120383 | 3,8786E-11 | 7,8348E-10 | [5, 6, 7, 8, 9, 10] | Group105 | 5,31  | 190,00 |
| GO:1903506 | regulation of nucleic acid-templated transcription                      | GO_BiologicalProcess-EBI-UniProt-GOA-ACAP-ARAP_08.05.2020_00h00 | 2,4081E-06 | 4,47175E-05 | 3,8786E-11 | 7,8348E-10 | [6, 7, 8, 9]        | Group105 | 5,37  | 196,00 |
| GO:0006366 | transcription by RNA polymerase II                                      | GO_BiologicalProcess-EBI-UniProt-GOA-ACAP-ARAP_08.05.2020_00h00 | 0,00105508 | 0,008946861 | 3,8786E-11 | 7,8348E-10 | [6, 7, 8, 9, 10]    | Group105 | 5,17  | 126,00 |



|            |                                                                         |                                                                 |            |             |            |            |                          |          |       |        |
|------------|-------------------------------------------------------------------------|-----------------------------------------------------------------|------------|-------------|------------|------------|--------------------------|----------|-------|--------|
| GO:0034401 | chromatin organization involved in regulation of transcription          | GO_BiologicalProcess-EBI-UniProt-GOA-ACAP-ARAP_08.05.2020_00h00 | 6,8998E-21 | 1,0122E-17  | 3,8786E-11 | 7,8348E-10 | [5, 6, 7, 8, 9, 10, 11]  | Group105 | 24,54 | 40,00  |
| GO:0045892 | negative regulation of transcription, DNA-templated                     | GO_BiologicalProcess-EBI-UniProt-GOA-ACAP-ARAP_08.05.2020_00h00 | 1,4756E-09 | 9,01966E-08 | 3,8786E-11 | 7,8348E-10 | [5, 6, 7, 8, 9, 10, 11]  | Group105 | 7,37  | 99,00  |
| GO:0045893 | positive regulation of transcription, DNA-templated                     | GO_BiologicalProcess-EBI-UniProt-GOA-ACAP-ARAP_08.05.2020_00h00 | 0,00098052 | 0,008717741 | 3,8786E-11 | 7,8348E-10 | [5, 6, 7, 8, 9, 10, 11]  | Group105 | 5,48  | 92,00  |
| GO:1903507 | negative regulation of nucleic acid-templated transcription             | GO_BiologicalProcess-EBI-UniProt-GOA-ACAP-ARAP_08.05.2020_00h00 | 2,9412E-10 | 2,87649E-08 | 3,8786E-11 | 7,8348E-10 | [6, 7, 8, 9, 10]         | Group105 | 7,44  | 104,00 |
| GO:1903508 | positive regulation of nucleic acid-templated transcription             | GO_BiologicalProcess-EBI-UniProt-GOA-ACAP-ARAP_08.05.2020_00h00 | 9,8332E-05 | 0,001222489 | 3,8786E-11 | 7,8348E-10 | [6, 7, 8, 9, 10]         | Group105 | 5,73  | 102,00 |
| GO:0003712 | transcription coregulator activity                                      | GO_BiologicalProcess-EBI-UniProt-GOA-ACAP-ARAP_08.05.2020_00h00 | 5,4984E-08 | 1,68046E-06 | 3,8786E-11 | 7,8348E-10 | [7, 8, 9, 10]            | Group105 | 8,65  | 55,00  |
| GO:0006357 | regulation of transcription by RNA polymerase II                        | GO_BiologicalProcess-EBI-UniProt-GOA-ACAP-ARAP_08.05.2020_00h00 | 0,0060812  | 0,029345805 | 3,8786E-11 | 7,8348E-10 | [6, 7, 8, 9, 10, 11]     | Group105 | 4,98  | 114,00 |
| GO:0000122 | negative regulation of transcription by RNA polymerase II               | GO_BiologicalProcess-EBI-UniProt-GOA-ACAP-ARAP_08.05.2020_00h00 | 0,01389223 | 0,048990164 | 3,8786E-11 | 7,8348E-10 | [6, 7, 8, 9, 10, 11, 12] | Group105 | 5,45  | 51,00  |
| GO:0003713 | transcription coactivator activity                                      | GO_BiologicalProcess-EBI-UniProt-GOA-ACAP-ARAP_08.05.2020_00h00 | 1,168E-05  | 0,000188293 | 3,8786E-11 | 7,8348E-10 | [7, 8, 9, 10, 11]        | Group105 | 8,99  | 33,00  |
| GO:0097549 | chromatin organization involved in negative regulation of transcription | GO_BiologicalProcess-EBI-UniProt-GOA-ACAP-ARAP_08.05.2020_00h00 | 1,0992E-18 | 5,37508E-16 | 3,8786E-11 | 7,8348E-10 | [6, 7, 8, 9, 10, 11, 12] | Group105 | 24,16 | 36,00  |
| GO:0016043 | cellular component organization                                         | GO_BiologicalProcess-EBI-UniProt-GOA-ACAP-ARAP_08.05.2020_00h00 | 1,8257E-09 | 1,03013E-07 | 2,4557E-10 | 4,1337E-09 | [3]                      | Group080 | 5,14  | 342,00 |
| GO:0044085 | cellular component biogenesis                                           | GO_BiologicalProcess-EBI-UniProt-GOA-ACAP-ARAP_08.05.2020_00h00 | 5,2892E-08 | 1,72428E-06 | 2,4557E-10 | 4,1337E-09 | [3]                      | Group080 | 5,69  | 191,00 |
| GO:0006996 | organelle organization                                                  | GO_BiologicalProcess-EBI-UniProt-GOA-ACAP-ARAP_08.05.2020_00h00 | 4,4619E-12 | 9,3508E-10  | 2,4557E-10 | 4,1337E-09 | [4]                      | Group080 | 5,89  | 246,00 |
| GO:0022607 | cellular component assembly                                             | GO_BiologicalProcess-EBI-UniProt-GOA-ACAP-ARAP_08.05.2020_00h00 | 1,375E-07  | 3,60206E-06 | 2,4557E-10 | 4,1337E-09 | [4]                      | Group080 | 5,71  | 178,00 |
| GO:0043933 | protein-containing complex subunit organization                         | GO_BiologicalProcess-EBI-UniProt-GOA-ACAP-ARAP_08.05.2020_00h00 | 3,9924E-09 | 1,83027E-07 | 2,4557E-10 | 4,1337E-09 | [4]                      | Group080 | 6,52  | 134,00 |
| GO:0051276 | chromosome organization                                                 | GO_BiologicalProcess-EBI-UniProt-GOA-ACAP-ARAP_08.05.2020_00h00 | 7,9756E-12 | 1,30003E-09 | 2,4557E-10 | 4,1337E-09 | [5]                      | Group080 | 7,92  | 104,00 |
| GO:0065003 | protein-containing complex assembly                                     | GO_BiologicalProcess-EBI-UniProt-GOA-ACAP-ARAP_08.05.2020_00h00 | 1,2949E-09 | 9,04551E-08 | 2,4557E-10 | 4,1337E-09 | [5]                      | Group080 | 6,87  | 121,00 |
| GO:0034622 | cellular protein-containing complex assembly                            | GO_BiologicalProcess-EBI-UniProt-GOA-ACAP-ARAP_08.05.2020_00h00 | 2,9425E-07 | 7,07637E-06 | 2,4557E-10 | 4,1337E-09 | [6]                      | Group080 | 7,07  | 81,00  |
| GO:0006325 | chromatin organization                                                  | GO_BiologicalProcess-EBI-UniProt-GOA-ACAP-ARAP_08.05.2020_00h00 | 2,6725E-13 | 7,84126E-11 | 6,6803E-10 | 9,6387E-09 | [4, 6]                   | Group095 | 9,48  | 81,00  |
| GO:0051276 | chromosome organization                                                 | GO_BiologicalProcess-EBI-UniProt-GOA-ACAP-ARAP_08.05.2020_00h00 | 7,9756E-12 | 1,30003E-09 | 6,6803E-10 | 9,6387E-09 | [5]                      | Group095 | 7,92  | 104,00 |
| GO:0033044 | regulation of chromosome organization                                   | GO_BiologicalProcess-EBI-UniProt-GOA-ACAP-ARAP_08.05.2020_00h00 | 0,0056442  | 0,028067946 | 6,6803E-10 | 9,6387E-09 | [5, 6]                   | Group095 | 6,81  | 26,00  |
| GO:0006479 | protein methylation                                                     | GO_BiologicalProcess-EBI-UniProt-GOA-ACAP-ARAP_08.05.2020_00h00 | 0,00525204 | 0,026568068 | 6,6803E-10 | 9,6387E-09 | [4, 5, 6, 7, 8]          | Group095 | 8,16  | 16,00  |
| GO:1902275 | regulation of chromatin organization                                    | GO_BiologicalProcess-EBI-UniProt-GOA-ACAP-ARAP_08.05.2020_00h00 | 0,00835802 | 0,035956629 | 6,6803E-10 | 9,6387E-09 | [5, 6, 7]                | Group095 | 7,77  | 16,00  |

|            |                                                                         |                                                                 |            |             |            |            |                                        |          |       |        |
|------------|-------------------------------------------------------------------------|-----------------------------------------------------------------|------------|-------------|------------|------------|----------------------------------------|----------|-------|--------|
| GO:0018193 | peptidyl-amino acid modification                                        | GO_BiologicalProcess-EBI-UniProt-GOA-ACAP-ARAP_08.05.2020_00h00 | 9,2461E-05 | 0,001169311 | 6,6803E-10 | 9,6387E-09 | [6, 7]                                 | Group095 | 6,02  | 83,00  |
| GO:0043543 | protein acylation                                                       | GO_BiologicalProcess-EBI-UniProt-GOA-ACAP-ARAP_08.05.2020_00h00 | 0,00368337 | 0,02110742  | 6,6803E-10 | 9,6387E-09 | [6, 7]                                 | Group095 | 7,72  | 20,00  |
| GO:0016570 | histone modification                                                    | GO_BiologicalProcess-EBI-UniProt-GOA-ACAP-ARAP_08.05.2020_00h00 | 0,00012397 | 0,00150305  | 6,6803E-10 | 9,6387E-09 | [6, 7, 8]                              | Group095 | 7,63  | 37,00  |
| GO:0016571 | histone methylation                                                     | GO_BiologicalProcess-EBI-UniProt-GOA-ACAP-ARAP_08.05.2020_00h00 | 0,00283803 | 0,017792288 | 6,6803E-10 | 9,6387E-09 | [5, 6, 7, 8, 9]                        | Group095 | 9,27  | 14,00  |
| GO:0018022 | peptidyl-lysine methylation                                             | GO_BiologicalProcess-EBI-UniProt-GOA-ACAP-ARAP_08.05.2020_00h00 | 0,00439728 | 0,023121173 | 6,6803E-10 | 9,6387E-09 | [5, 6, 7, 8, 9]                        | Group095 | 9,15  | 13,00  |
| GO:0018205 | peptidyl-lysine modification                                            | GO_BiologicalProcess-EBI-UniProt-GOA-ACAP-ARAP_08.05.2020_00h00 | 2,6372E-06 | 4,83594E-05 | 6,6803E-10 | 9,6387E-09 | [7, 8]                                 | Group095 | 8,98  | 38,00  |
| GO:0006475 | internal protein amino acid acetylation                                 | GO_BiologicalProcess-EBI-UniProt-GOA-ACAP-ARAP_08.05.2020_00h00 | 0,00191473 | 0,01390548  | 6,6803E-10 | 9,6387E-09 | [8, 9]                                 | Group095 | 9,04  | 16,00  |
| GO:0016573 | histone acetylation                                                     | GO_BiologicalProcess-EBI-UniProt-GOA-ACAP-ARAP_08.05.2020_00h00 | 0,00262382 | 0,01703164  | 6,6803E-10 | 9,6387E-09 | [7, 8, 9, 10, 11]                      | Group095 | 9,04  | 15,00  |
| GO:0031935 | regulation of chromatin silencing                                       | GO_BiologicalProcess-EBI-UniProt-GOA-ACAP-ARAP_08.05.2020_00h00 | 9,3095E-05 | 0,001167273 | 6,6803E-10 | 9,6387E-09 | [4, 5, 6, 7, 8, 9, 10, 11, 12, 13, 14] | Group095 | 30,00 | 6,00   |
| GO:0070734 | histone H3-K27 methylation                                              | GO_BiologicalProcess-EBI-UniProt-GOA-ACAP-ARAP_08.05.2020_00h00 | 0,01397906 | 0,049060475 | 6,6803E-10 | 9,6387E-09 | [7, 8, 9, 10, 11]                      | Group095 | 16,67 | 4,00   |
| GO:0006352 | DNA-templated transcription, initiation                                 | GO_BiologicalProcess-EBI-UniProt-GOA-ACAP-ARAP_08.05.2020_00h00 | 1,7056E-07 | 4,31389E-06 | 8,8085E-09 | 1,1121E-07 | [6, 7, 8, 9, 10]                       | Group049 | 11,31 | 31,00  |
| GO:0003713 | transcription coactivator activity                                      | GO_BiologicalProcess-EBI-UniProt-GOA-ACAP-ARAP_08.05.2020_00h00 | 1,168E-05  | 0,000188293 | 8,8085E-09 | 1,1121E-07 | [7, 8, 9, 10, 11]                      | Group049 | 8,99  | 33,00  |
| GO:0006367 | transcription initiation from RNA polymerase II promoter                | GO_BiologicalProcess-EBI-UniProt-GOA-ACAP-ARAP_08.05.2020_00h00 | 0,0006665  | 0,006562146 | 8,8085E-09 | 1,1121E-07 | [7, 8, 9, 10, 11]                      | Group049 | 9,13  | 19,00  |
| GO:0009890 | negative regulation of biosynthetic process                             | GO_BiologicalProcess-EBI-UniProt-GOA-ACAP-ARAP_08.05.2020_00h00 | 4,8092E-09 | 2,07501E-07 | 4,5037E-08 | 5,0541E-07 | [3, 4, 5]                              | Group094 | 6,77  | 118,00 |
| GO:0031324 | negative regulation of cellular metabolic process                       | GO_BiologicalProcess-EBI-UniProt-GOA-ACAP-ARAP_08.05.2020_00h00 | 3,2119E-08 | 1,12185E-06 | 4,5037E-08 | 5,0541E-07 | [3, 4, 5]                              | Group094 | 5,94  | 166,00 |
| GO:0051172 | negative regulation of nitrogen compound metabolic process              | GO_BiologicalProcess-EBI-UniProt-GOA-ACAP-ARAP_08.05.2020_00h00 | 6,0798E-08 | 1,82022E-06 | 4,5037E-08 | 5,0541E-07 | [3, 4, 5]                              | Group094 | 6,00  | 154,00 |
| GO:0003690 | double-stranded DNA binding                                             | GO_MolecularFunction-EBI-UniProt-GOA-ACAP-ARAP_08.05.2020_00h00 | 0,01251934 | 0,045460086 | 4,5037E-08 | 5,0541E-07 | [5]                                    | Group094 | 5,29  | 63,00  |
| GO:0010558 | negative regulation of macromolecule biosynthetic process               | GO_BiologicalProcess-EBI-UniProt-GOA-ACAP-ARAP_08.05.2020_00h00 | 1,1945E-09 | 9,223E-08   | 4,5037E-08 | 5,0541E-07 | [4, 5, 6]                              | Group094 | 7,00  | 115,00 |
| GO:0010629 | negative regulation of gene expression                                  | GO_BiologicalProcess-EBI-UniProt-GOA-ACAP-ARAP_08.05.2020_00h00 | 2,5845E-08 | 9,24739E-07 | 4,5037E-08 | 5,0541E-07 | [4, 5, 6]                              | Group094 | 6,23  | 141,00 |
| GO:0045934 | negative regulation of nucleobase-containing compound metabolic process | GO_BiologicalProcess-EBI-UniProt-GOA-ACAP-ARAP_08.05.2020_00h00 | 9,9987E-09 | 4,19088E-07 | 4,5037E-08 | 5,0541E-07 | [4, 5, 6]                              | Group094 | 6,85  | 110,00 |
| GO:0051253 | negative regulation of RNA metabolic process                            | GO_BiologicalProcess-EBI-UniProt-GOA-ACAP-ARAP_08.05.2020_00h00 | 1,6995E-09 | 9,97274E-08 | 4,5037E-08 | 5,0541E-07 | [4, 5, 6, 7, 8]                        | Group094 | 7,14  | 107,00 |
| GO:2000113 | negative regulation of cellular macromolecule biosynthetic process      | GO_BiologicalProcess-EBI-UniProt-GOA-ACAP-ARAP_08.05.2020_00h00 | 1,8643E-09 | 9,76766E-08 | 4,5037E-08 | 5,0541E-07 | [5, 6, 7]                              | Group094 | 7,06  | 110,00 |
| GO:0006366 | transcription by RNA polymerase II                                      | GO_BiologicalProcess-EBI-UniProt-GOA-ACAP-ARAP_08.05.2020_00h00 | 0,00105508 | 0,008946861 | 4,5037E-08 | 5,0541E-07 | [6, 7, 8, 9, 10]                       | Group094 | 5,17  | 126,00 |

|            |                                                             |                                                                 |            |             |            |            |                          |          |      |        |
|------------|-------------------------------------------------------------|-----------------------------------------------------------------|------------|-------------|------------|------------|--------------------------|----------|------|--------|
| GO:0045892 | negative regulation of transcription, DNA-templated         | GO_BiologicalProcess-EBI-UniProt-GOA-ACAP-ARAP_08.05.2020_00h00 | 1,4756E-09 | 9,01966E-08 | 4,5037E-08 | 5,0541E-07 | [5, 6, 7, 8, 9, 10, 11]  | Group094 | 7,37 | 99,00  |
| GO:1903507 | negative regulation of nucleic acid-templated transcription | GO_BiologicalProcess-EBI-UniProt-GOA-ACAP-ARAP_08.05.2020_00h00 | 2,9412E-10 | 2,87649E-08 | 4,5037E-08 | 5,0541E-07 | [6, 7, 8, 9, 10]         | Group094 | 7,44 | 104,00 |
| GO:0006357 | regulation of transcription by RNA polymerase II            | GO_BiologicalProcess-EBI-UniProt-GOA-ACAP-ARAP_08.05.2020_00h00 | 0,0060812  | 0,029345805 | 4,5037E-08 | 5,0541E-07 | [6, 7, 8, 9, 10, 11]     | Group094 | 4,98 | 114,00 |
| GO:0000122 | negative regulation of transcription by RNA polymerase II   | GO_BiologicalProcess-EBI-UniProt-GOA-ACAP-ARAP_08.05.2020_00h00 | 0,01389223 | 0,048990164 | 4,5037E-08 | 5,0541E-07 | [6, 7, 8, 9, 10, 11, 12] | Group094 | 5,45 | 51,00  |
| GO:0048518 | positive regulation of biological process                   | GO_BiologicalProcess-EBI-UniProt-GOA-ACAP-ARAP_08.05.2020_00h00 | 0,00105434 | 0,00899257  | 2,1593E-07 | 1,9826E-06 | [1, 2, 3]                | Group102 | 4,59 | 301,00 |
| GO:0019222 | regulation of metabolic process                             | GO_BiologicalProcess-EBI-UniProt-GOA-ACAP-ARAP_08.05.2020_00h00 | 0,00015854 | 0,001875573 | 2,1593E-07 | 1,9826E-06 | [2, 3]                   | Group102 | 4,63 | 338,00 |
| GO:0023051 | regulation of signaling                                     | GO_BiologicalProcess-EBI-UniProt-GOA-ACAP-ARAP_08.05.2020_00h00 | 0,00106459 | 0,008975607 | 2,1593E-07 | 1,9826E-06 | [2, 3]                   | Group102 | 4,87 | 187,00 |
| GO:0048583 | regulation of response to stimulus                          | GO_BiologicalProcess-EBI-UniProt-GOA-ACAP-ARAP_08.05.2020_00h00 | 0,0140207  | 0,049089178 | 2,1593E-07 | 1,9826E-06 | [2, 3]                   | Group102 | 4,55 | 206,00 |
| GO:0051239 | regulation of multicellular organismal process              | GO_BiologicalProcess-EBI-UniProt-GOA-ACAP-ARAP_08.05.2020_00h00 | 1,3622E-05 | 0,00021487  | 2,1593E-07 | 1,9826E-06 | [2, 3]                   | Group102 | 5,31 | 181,00 |
| GO:0009893 | positive regulation of metabolic process                    | GO_BiologicalProcess-EBI-UniProt-GOA-ACAP-ARAP_08.05.2020_00h00 | 0,0014638  | 0,011126414 | 2,1593E-07 | 1,9826E-06 | [2, 3, 4]                | Group102 | 4,81 | 197,00 |
| GO:0023056 | positive regulation of signaling                            | GO_BiologicalProcess-EBI-UniProt-GOA-ACAP-ARAP_08.05.2020_00h00 | 0,00616386 | 0,029550245 | 2,1593E-07 | 1,9826E-06 | [2, 3, 4]                | Group102 | 5,05 | 103,00 |
| GO:0023057 | negative regulation of signaling                            | GO_BiologicalProcess-EBI-UniProt-GOA-ACAP-ARAP_08.05.2020_00h00 | 0,0039485  | 0,02194107  | 2,1593E-07 | 1,9826E-06 | [2, 3, 4]                | Group102 | 5,34 | 81,00  |
| GO:0043170 | macromolecule metabolic process                             | GO_BiologicalProcess-EBI-UniProt-GOA-ACAP-ARAP_08.05.2020_00h00 | 8,5739E-07 | 1,8497E-05  | 2,1593E-07 | 1,9826E-06 | [3]                      | Group102 | 4,63 | 455,00 |
| GO:0044092 | negative regulation of molecular function                   | GO_BiologicalProcess-EBI-UniProt-GOA-ACAP-ARAP_08.05.2020_00h00 | 0,00552191 | 0,027553212 | 2,1593E-07 | 1,9826E-06 | [3]                      | Group102 | 5,43 | 68,00  |
| GO:0048522 | positive regulation of cellular process                     | GO_BiologicalProcess-EBI-UniProt-GOA-ACAP-ARAP_08.05.2020_00h00 | 6,6865E-05 | 0,000899924 | 2,1593E-07 | 1,9826E-06 | [2, 3, 4]                | Group102 | 4,80 | 286,00 |
| GO:0048584 | positive regulation of response to stimulus                 | GO_BiologicalProcess-EBI-UniProt-GOA-ACAP-ARAP_08.05.2020_00h00 | 0,00860397 | 0,036691941 | 2,1593E-07 | 1,9826E-06 | [2, 3, 4]                | Group102 | 4,86 | 126,00 |
| GO:0051240 | positive regulation of multicellular organismal process     | GO_BiologicalProcess-EBI-UniProt-GOA-ACAP-ARAP_08.05.2020_00h00 | 0,00121394 | 0,009731382 | 2,1593E-07 | 1,9826E-06 | [2, 3, 4]                | Group102 | 5,34 | 102,00 |
| GO:1901564 | organonitrogen compound metabolic process                   | GO_BiologicalProcess-EBI-UniProt-GOA-ACAP-ARAP_08.05.2020_00h00 | 1,8206E-06 | 3,56114E-05 | 2,1593E-07 | 1,9826E-06 | [3]                      | Group102 | 4,85 | 342,00 |
| GO:0010646 | regulation of cell communication                            | GO_BiologicalProcess-EBI-UniProt-GOA-ACAP-ARAP_08.05.2020_00h00 | 0,00083746 | 0,007875319 | 2,1593E-07 | 1,9826E-06 | [3, 4]                   | Group102 | 4,90 | 186,00 |
| GO:0010941 | regulation of cell death                                    | GO_BiologicalProcess-EBI-UniProt-GOA-ACAP-ARAP_08.05.2020_00h00 | 0,00652066 | 0,03065965  | 2,1593E-07 | 1,9826E-06 | [3, 4]                   | Group102 | 5,13 | 92,00  |
| GO:0019538 | protein metabolic process                                   | GO_BiologicalProcess-EBI-UniProt-GOA-ACAP-ARAP_08.05.2020_00h00 | 8,5578E-05 | 0,001091683 | 2,1593E-07 | 1,9826E-06 | [3, 4]                   | Group102 | 4,77 | 290,00 |
| GO:0031323 | regulation of cellular metabolic process                    | GO_BiologicalProcess-EBI-UniProt-GOA-ACAP-ARAP_08.05.2020_00h00 | 6,7258E-05 | 0,000896979 | 2,1593E-07 | 1,9826E-06 | [3, 4]                   | Group102 | 4,74 | 311,00 |
| GO:0044260 | cellular macromolecule metabolic process                    | GO_BiologicalProcess-EBI-UniProt-GOA-ACAP-ARAP_08.05.2020_00h00 | 8,6487E-08 | 2,43993E-06 | 2,1593E-07 | 1,9826E-06 | [3, 4]                   | Group102 | 4,80 | 411,00 |

|            |                                                                         |                                                                 |            |             |            |            |              |          |      |        |
|------------|-------------------------------------------------------------------------|-----------------------------------------------------------------|------------|-------------|------------|------------|--------------|----------|------|--------|
| GO:0051171 | regulation of nitrogen compound metabolic process                       | GO_BiologicalProcess-EBI-UniProt-GOA-ACAP-ARAP_08.05.2020_00h00 | 0,00052879 | 0,005540913 | 2,1593E-07 | 1,9826E-06 | [3, 4]       | Group102 | 4,66 | 287,00 |
| GO:0060255 | regulation of macromolecule metabolic process                           | GO_BiologicalProcess-EBI-UniProt-GOA-ACAP-ARAP_08.05.2020_00h00 | 0,00033958 | 0,003690134 | 2,1593E-07 | 1,9826E-06 | [3, 4]       | Group102 | 4,64 | 312,00 |
| GO:0080090 | regulation of primary metabolic process                                 | GO_BiologicalProcess-EBI-UniProt-GOA-ACAP-ARAP_08.05.2020_00h00 | 0,00023645 | 0,002709926 | 2,1593E-07 | 1,9826E-06 | [3, 4]       | Group102 | 4,69 | 298,00 |
| GO:0006796 | phosphate-containing compound metabolic process                         | GO_BiologicalProcess-EBI-UniProt-GOA-ACAP-ARAP_08.05.2020_00h00 | 0,0036411  | 0,021029476 | 2,1593E-07 | 1,9826E-06 | [4]          | Group102 | 4,81 | 168,00 |
| GO:0009891 | positive regulation of biosynthetic process                             | GO_BiologicalProcess-EBI-UniProt-GOA-ACAP-ARAP_08.05.2020_00h00 | 0,00021445 | 0,002496809 | 2,1593E-07 | 1,9826E-06 | [3, 4, 5]    | Group102 | 5,43 | 120,00 |
| GO:0009966 | regulation of signal transduction                                       | GO_BiologicalProcess-EBI-UniProt-GOA-ACAP-ARAP_08.05.2020_00h00 | 0,00121141 | 0,009764508 | 2,1593E-07 | 1,9826E-06 | [3, 4, 5]    | Group102 | 4,95 | 163,00 |
| GO:0010604 | positive regulation of macromolecule metabolic process                  | GO_BiologicalProcess-EBI-UniProt-GOA-ACAP-ARAP_08.05.2020_00h00 | 0,00104636 | 0,009029456 | 2,1593E-07 | 1,9826E-06 | [3, 4, 5]    | Group102 | 4,88 | 185,00 |
| GO:0010605 | negative regulation of macromolecule metabolic process                  | GO_BiologicalProcess-EBI-UniProt-GOA-ACAP-ARAP_08.05.2020_00h00 | 5,4703E-08 | 1,70742E-06 | 2,1593E-07 | 1,9826E-06 | [3, 4, 5]    | Group102 | 5,77 | 180,00 |
| GO:0010647 | positive regulation of cell communication                               | GO_BiologicalProcess-EBI-UniProt-GOA-ACAP-ARAP_08.05.2020_00h00 | 0,00550487 | 0,027561951 | 2,1593E-07 | 1,9826E-06 | [3, 4, 5]    | Group102 | 5,07 | 103,00 |
| GO:0010648 | negative regulation of cell communication                               | GO_BiologicalProcess-EBI-UniProt-GOA-ACAP-ARAP_08.05.2020_00h00 | 0,00375159 | 0,02124938  | 2,1593E-07 | 1,9826E-06 | [3, 4, 5]    | Group102 | 5,35 | 81,00  |
| GO:0031324 | negative regulation of cellular metabolic process                       | GO_BiologicalProcess-EBI-UniProt-GOA-ACAP-ARAP_08.05.2020_00h00 | 3,2119E-08 | 1,12185E-06 | 2,1593E-07 | 1,9826E-06 | [3, 4, 5]    | Group102 | 5,94 | 166,00 |
| GO:0031325 | positive regulation of cellular metabolic process                       | GO_BiologicalProcess-EBI-UniProt-GOA-ACAP-ARAP_08.05.2020_00h00 | 0,00059574 | 0,005985978 | 2,1593E-07 | 1,9826E-06 | [3, 4, 5]    | Group102 | 4,96 | 179,00 |
| GO:0043412 | macromolecule modification                                              | GO_BiologicalProcess-EBI-UniProt-GOA-ACAP-ARAP_08.05.2020_00h00 | 0,00093585 | 0,008527306 | 2,1593E-07 | 1,9826E-06 | [4]          | Group102 | 4,78 | 220,00 |
| GO:0051172 | negative regulation of nitrogen compound metabolic process              | GO_BiologicalProcess-EBI-UniProt-GOA-ACAP-ARAP_08.05.2020_00h00 | 6,0798E-08 | 1,82022E-06 | 2,1593E-07 | 1,9826E-06 | [3, 4, 5]    | Group102 | 6,00 | 154,00 |
| GO:0051173 | positive regulation of nitrogen compound metabolic process              | GO_BiologicalProcess-EBI-UniProt-GOA-ACAP-ARAP_08.05.2020_00h00 | 0,00064401 | 0,006426958 | 2,1593E-07 | 1,9826E-06 | [3, 4, 5]    | Group102 | 4,99 | 171,00 |
| GO:0009967 | positive regulation of signal transduction                              | GO_BiologicalProcess-EBI-UniProt-GOA-ACAP-ARAP_08.05.2020_00h00 | 0,00303475 | 0,018472932 | 2,1593E-07 | 1,9826E-06 | [3, 4, 5, 6] | Group102 | 5,26 | 93,00  |
| GO:0009968 | negative regulation of signal transduction                              | GO_BiologicalProcess-EBI-UniProt-GOA-ACAP-ARAP_08.05.2020_00h00 | 0,00653157 | 0,030612811 | 2,1593E-07 | 1,9826E-06 | [3, 4, 5, 6] | Group102 | 5,33 | 72,00  |
| GO:0044267 | cellular protein metabolic process                                      | GO_BiologicalProcess-EBI-UniProt-GOA-ACAP-ARAP_08.05.2020_00h00 | 2,264E-06  | 4,31332E-05 | 2,1593E-07 | 1,9826E-06 | [4, 5]       | Group102 | 5,03 | 275,00 |
| GO:0051246 | regulation of protein metabolic process                                 | GO_BiologicalProcess-EBI-UniProt-GOA-ACAP-ARAP_08.05.2020_00h00 | 0,00302843 | 0,018588707 | 2,1593E-07 | 1,9826E-06 | [4, 5]       | Group102 | 4,91 | 148,00 |
| GO:0010557 | positive regulation of macromolecule biosynthetic process               | GO_BiologicalProcess-EBI-UniProt-GOA-ACAP-ARAP_08.05.2020_00h00 | 8,2418E-05 | 0,001060587 | 2,1593E-07 | 1,9826E-06 | [4, 5, 6]    | Group102 | 5,60 | 116,00 |
| GO:0016310 | phosphorylation                                                         | GO_BiologicalProcess-EBI-UniProt-GOA-ACAP-ARAP_08.05.2020_00h00 | 0,009714   | 0,039694816 | 2,1593E-07 | 1,9826E-06 | [5]          | Group102 | 4,85 | 125,00 |
| GO:0032268 | regulation of cellular protein metabolic process                        | GO_BiologicalProcess-EBI-UniProt-GOA-ACAP-ARAP_08.05.2020_00h00 | 0,00110744 | 0,009230763 | 2,1593E-07 | 1,9826E-06 | [4, 5, 6]    | Group102 | 5,06 | 143,00 |
| GO:0045935 | positive regulation of nucleobase-containing compound metabolic process | GO_BiologicalProcess-EBI-UniProt-GOA-ACAP-ARAP_08.05.2020_00h00 | 0,00017084 | 0,002004963 | 2,1593E-07 | 1,9826E-06 | [4, 5, 6]    | Group102 | 5,53 | 113,00 |

|            |                                                           |                                                                 |            |             |            |            |                                  |          |       |        |
|------------|-----------------------------------------------------------|-----------------------------------------------------------------|------------|-------------|------------|------------|----------------------------------|----------|-------|--------|
| GO:0006464 | cellular protein modification process                     | GO_BiologicalProcess-EBI-UniProt-GOA-ACAP-ARAP_08.05.2020_00h00 | 0,00113649 | 0,00941937  | 2,1593E-07 | 1,9826E-06 | [5, 6]                           | Group102 | 4,79  | 210,00 |
| GO:0019220 | regulation of phosphate metabolic process                 | GO_BiologicalProcess-EBI-UniProt-GOA-ACAP-ARAP_08.05.2020_00h00 | 0,00670985 | 0,031051561 | 2,1593E-07 | 1,9826E-06 | [5, 6]                           | Group102 | 5,08  | 98,00  |
| GO:0032270 | positive regulation of cellular protein metabolic process | GO_BiologicalProcess-EBI-UniProt-GOA-ACAP-ARAP_08.05.2020_00h00 | 0,01391572 | 0,048955314 | 2,1593E-07 | 1,9826E-06 | [4, 5, 6, 7]                     | Group102 | 5,02  | 86,00  |
| GO:0042981 | regulation of apoptotic process                           | GO_BiologicalProcess-EBI-UniProt-GOA-ACAP-ARAP_08.05.2020_00h00 | 0,00142297 | 0,010872362 | 2,1593E-07 | 1,9826E-06 | [5, 6]                           | Group102 | 5,44  | 89,00  |
| GO:0031399 | regulation of protein modification process                | GO_BiologicalProcess-EBI-UniProt-GOA-ACAP-ARAP_08.05.2020_00h00 | 0,00122922 | 0,009747351 | 2,1593E-07 | 1,9826E-06 | [5, 6, 7]                        | Group102 | 5,31  | 105,00 |
| GO:0045936 | negative regulation of phosphate metabolic process        | GO_BiologicalProcess-EBI-UniProt-GOA-ACAP-ARAP_08.05.2020_00h00 | 0,00908706 | 0,037979245 | 2,1593E-07 | 1,9826E-06 | [5, 6, 7]                        | Group102 | 6,02  | 36,00  |
| GO:0051254 | positive regulation of RNA metabolic process              | GO_BiologicalProcess-EBI-UniProt-GOA-ACAP-ARAP_08.05.2020_00h00 | 0,0002428  | 0,002761146 | 2,1593E-07 | 1,9826E-06 | [4, 5, 6, 7, 8]                  | Group102 | 5,57  | 104,00 |
| GO:0018193 | peptidyl-amino acid modification                          | GO_BiologicalProcess-EBI-UniProt-GOA-ACAP-ARAP_08.05.2020_00h00 | 9,2461E-05 | 0,001169311 | 2,1593E-07 | 1,9826E-06 | [6, 7]                           | Group102 | 6,02  | 83,00  |
| GO:0031400 | negative regulation of protein modification process       | GO_BiologicalProcess-EBI-UniProt-GOA-ACAP-ARAP_08.05.2020_00h00 | 0,00745149 | 0,03282683  | 2,1593E-07 | 1,9826E-06 | [5, 6, 7, 8]                     | Group102 | 6,02  | 38,00  |
| GO:0042325 | regulation of phosphorylation                             | GO_BiologicalProcess-EBI-UniProt-GOA-ACAP-ARAP_08.05.2020_00h00 | 0,0058829  | 0,028960451 | 2,1593E-07 | 1,9826E-06 | [6, 7]                           | Group102 | 5,17  | 89,00  |
| GO:0001932 | regulation of protein phosphorylation                     | GO_BiologicalProcess-EBI-UniProt-GOA-ACAP-ARAP_08.05.2020_00h00 | 0,01202917 | 0,044227567 | 2,1593E-07 | 1,9826E-06 | [6, 7, 8]                        | Group102 | 5,12  | 79,00  |
| GO:0044085 | cellular component biogenesis                             | GO_BiologicalProcess-EBI-UniProt-GOA-ACAP-ARAP_08.05.2020_00h00 | 5,2892E-08 | 1,72428E-06 | 1,9697E-07 | 1,9894E-06 | [3]                              | Group089 | 5,69  | 191,00 |
| GO:0022607 | cellular component assembly                               | GO_BiologicalProcess-EBI-UniProt-GOA-ACAP-ARAP_08.05.2020_00h00 | 1,375E-07  | 3,60206E-06 | 1,9697E-07 | 1,9894E-06 | [4]                              | Group089 | 5,71  | 178,00 |
| GO:0043933 | protein-containing complex subunit organization           | GO_BiologicalProcess-EBI-UniProt-GOA-ACAP-ARAP_08.05.2020_00h00 | 3,9924E-09 | 1,83027E-07 | 1,9697E-07 | 1,9894E-06 | [4]                              | Group089 | 6,52  | 134,00 |
| GO:0065003 | protein-containing complex assembly                       | GO_BiologicalProcess-EBI-UniProt-GOA-ACAP-ARAP_08.05.2020_00h00 | 1,2949E-09 | 9,04551E-08 | 1,9697E-07 | 1,9894E-06 | [5]                              | Group089 | 6,87  | 121,00 |
| GO:0071824 | protein-DNA complex subunit organization                  | GO_BiologicalProcess-EBI-UniProt-GOA-ACAP-ARAP_08.05.2020_00h00 | 2,5592E-09 | 1,29459E-07 | 1,9697E-07 | 1,9894E-06 | [5]                              | Group089 | 11,94 | 37,00  |
| GO:0006333 | chromatin assembly or disassembly                         | GO_BiologicalProcess-EBI-UniProt-GOA-ACAP-ARAP_08.05.2020_00h00 | 1,4678E-09 | 9,36214E-08 | 1,9697E-07 | 1,9894E-06 | [5, 7]                           | Group089 | 13,50 | 32,00  |
| GO:0034622 | cellular protein-containing complex assembly              | GO_BiologicalProcess-EBI-UniProt-GOA-ACAP-ARAP_08.05.2020_00h00 | 2,9425E-07 | 7,07637E-06 | 1,9697E-07 | 1,9894E-06 | [6]                              | Group089 | 7,07  | 81,00  |
| GO:0034728 | nucleosome organization                                   | GO_BiologicalProcess-EBI-UniProt-GOA-ACAP-ARAP_08.05.2020_00h00 | 3,468E-09  | 1,64113E-07 | 1,9697E-07 | 1,9894E-06 | [5, 6, 7]                        | Group089 | 14,43 | 28,00  |
| GO:0071103 | DNA conformation change                                   | GO_BiologicalProcess-EBI-UniProt-GOA-ACAP-ARAP_08.05.2020_00h00 | 6,4405E-08 | 1,88965E-06 | 1,9697E-07 | 1,9894E-06 | [6]                              | Group089 | 10,26 | 39,00  |
| GO:0065004 | protein-DNA complex assembly                              | GO_BiologicalProcess-EBI-UniProt-GOA-ACAP-ARAP_08.05.2020_00h00 | 2,7077E-10 | 2,8373E-08  | 1,9697E-07 | 1,9894E-06 | [6, 7]                           | Group089 | 13,46 | 35,00  |
| GO:0006334 | nucleosome assembly                                       | GO_BiologicalProcess-EBI-UniProt-GOA-ACAP-ARAP_08.05.2020_00h00 | 7,4995E-10 | 6,47167E-08 | 1,9697E-07 | 1,9894E-06 | [6, 7, 8, 9]                     | Group089 | 17,01 | 25,00  |
| GO:0050772 | positive regulation of axonogenesis                       | GO_BiologicalProcess-EBI-UniProt-GOA-ACAP-ARAP_08.05.2020_00h00 | 0,0013666  | 0,010551599 | 3,4796E-07 | 2,9287E-06 | [6, 7, 8, 9, 10, 11, 12, 13, 14] | Group093 | 11,58 | 11,00  |
| GO:0051094 | positive regulation of developmental process              | GO_BiologicalProcess-EBI-UniProt-GOA-ACAP-ARAP_08.05.2020_00h00 | 0,00128977 | 0,010118128 | 3,4796E-07 | 2,9287E-06 | [2, 3, 4]                        | Group093 | 5,55  | 82,00  |

|            |                                                                       |                                                                 |            |             |            |            |                      |          |       |        |
|------------|-----------------------------------------------------------------------|-----------------------------------------------------------------|------------|-------------|------------|------------|----------------------|----------|-------|--------|
| GO:0051240 | positive regulation of multicellular organismal process               | GO_BiologicalProcess-EBI-UniProt-GOA-ACAP-ARAP_08.05.2020_00h00 | 0,00121394 | 0,009731382 | 3,4796E-07 | 2,9287E-06 | [2, 3, 4]            | Group093 | 5,34  | 102,00 |
| GO:0022603 | regulation of anatomical structure morphogenesis                      | GO_BiologicalProcess-EBI-UniProt-GOA-ACAP-ARAP_08.05.2020_00h00 | 0,00284967 | 0,017713821 | 3,4796E-07 | 2,9287E-06 | [3, 4]               | Group093 | 5,62  | 66,00  |
| GO:0045595 | regulation of cell differentiation                                    | GO_BiologicalProcess-EBI-UniProt-GOA-ACAP-ARAP_08.05.2020_00h00 | 1,4649E-06 | 2,90403E-05 | 3,4796E-07 | 2,9287E-06 | [3, 4]               | Group093 | 6,06  | 120,00 |
| GO:0051128 | regulation of cellular component organization                         | GO_BiologicalProcess-EBI-UniProt-GOA-ACAP-ARAP_08.05.2020_00h00 | 0,00053505 | 0,005566799 | 3,4796E-07 | 2,9287E-06 | [3, 4]               | Group093 | 5,21  | 133,00 |
| GO:0060560 | developmental growth involved in morphogenesis                        | GO_BiologicalProcess-EBI-UniProt-GOA-ACAP-ARAP_08.05.2020_00h00 | 0,00172929 | 0,012748064 | 3,4796E-07 | 2,9287E-06 | [3, 4]               | Group093 | 8,08  | 21,00  |
| GO:0045597 | positive regulation of cell differentiation                           | GO_BiologicalProcess-EBI-UniProt-GOA-ACAP-ARAP_08.05.2020_00h00 | 0,00057936 | 0,005943533 | 3,4796E-07 | 2,9287E-06 | [3, 4, 5]            | Group093 | 6,03  | 64,00  |
| GO:0051130 | positive regulation of cellular component organization                | GO_BiologicalProcess-EBI-UniProt-GOA-ACAP-ARAP_08.05.2020_00h00 | 0,00397208 | 0,021988861 | 3,4796E-07 | 2,9287E-06 | [3, 4, 5]            | Group093 | 5,46  | 71,00  |
| GO:0033043 | regulation of organelle organization                                  | GO_BiologicalProcess-EBI-UniProt-GOA-ACAP-ARAP_08.05.2020_00h00 | 0,00119093 | 0,009706078 | 3,4796E-07 | 2,9287E-06 | [4, 5]               | Group093 | 5,62  | 78,00  |
| GO:0010638 | positive regulation of organelle organization                         | GO_BiologicalProcess-EBI-UniProt-GOA-ACAP-ARAP_08.05.2020_00h00 | 0,00249017 | 0,016381536 | 3,4796E-07 | 2,9287E-06 | [4, 5, 6]            | Group093 | 6,23  | 43,00  |
| GO:0010720 | positive regulation of cell development                               | GO_BiologicalProcess-EBI-UniProt-GOA-ACAP-ARAP_08.05.2020_00h00 | 0,01184334 | 0,044209119 | 3,4796E-07 | 2,9287E-06 | [4, 5, 6]            | Group093 | 5,91  | 36,00  |
| GO:0010770 | positive regulation of cell morphogenesis involved in differentiation | GO_BiologicalProcess-EBI-UniProt-GOA-ACAP-ARAP_08.05.2020_00h00 | 0,00329477 | 0,019333733 | 3,4796E-07 | 2,9287E-06 | [5, 6, 7]            | Group093 | 8,82  | 15,00  |
| GO:0050769 | positive regulation of neurogenesis                                   | GO_BiologicalProcess-EBI-UniProt-GOA-ACAP-ARAP_08.05.2020_00h00 | 0,0070058  | 0,03172072  | 3,4796E-07 | 2,9287E-06 | [4, 5, 6, 7, 8, 9]   | Group093 | 6,26  | 33,00  |
| GO:0006259 | DNA metabolic process                                                 | GO_BiologicalProcess-EBI-UniProt-GOA-ACAP-ARAP_08.05.2020_00h00 | 4,5874E-07 | 1,01965E-05 | 4,2095E-07 | 3,2705E-06 | [4, 5, 6]            | Group054 | 7,26  | 73,00  |
| GO:2001020 | regulation of response to DNA damage stimulus                         | GO_BiologicalProcess-EBI-UniProt-GOA-ACAP-ARAP_08.05.2020_00h00 | 0,0073145  | 0,032615103 | 4,2095E-07 | 3,2705E-06 | [4, 5, 6]            | Group054 | 7,53  | 18,00  |
| GO:0051052 | regulation of DNA metabolic process                                   | GO_BiologicalProcess-EBI-UniProt-GOA-ACAP-ARAP_08.05.2020_00h00 | 0,00325071 | 0,019306853 | 4,2095E-07 | 3,2705E-06 | [4, 5, 6, 7]         | Group054 | 7,01  | 27,00  |
| GO:0000726 | non-recombinational repair                                            | GO_BiologicalProcess-EBI-UniProt-GOA-ACAP-ARAP_08.05.2020_00h00 | 3,3384E-05 | 0,000484896 | 4,2095E-07 | 3,2705E-06 | [6, 7, 8]            | Group054 | 13,51 | 15,00  |
| GO:0002520 | immune system development                                             | GO_BiologicalProcess-EBI-UniProt-GOA-ACAP-ARAP_08.05.2020_00h00 | 2,2993E-06 | 4,32451E-05 | 2,2993E-06 | 1,6588E-05 | [2, 4, 5]            | Group071 | 6,92  | 74,00  |
| GO:0048534 | hematopoietic or lymphoid organ development                           | GO_BiologicalProcess-EBI-UniProt-GOA-ACAP-ARAP_08.05.2020_00h00 | 8,8905E-07 | 1,89019E-05 | 2,2993E-06 | 1,6588E-05 | [3, 4, 5, 6]         | Group071 | 7,16  | 72,00  |
| GO:0030097 | hemopoiesis                                                           | GO_BiologicalProcess-EBI-UniProt-GOA-ACAP-ARAP_08.05.2020_00h00 | 1,4609E-06 | 2,9358E-05  | 2,2993E-06 | 1,6588E-05 | [4, 5, 6, 7]         | Group071 | 7,17  | 69,00  |
| GO:0002521 | leukocyte differentiation                                             | GO_BiologicalProcess-EBI-UniProt-GOA-ACAP-ARAP_08.05.2020_00h00 | 0,00172079 | 0,012749455 | 2,2993E-06 | 1,6588E-05 | [4, 5, 6, 7, 8]      | Group071 | 6,63  | 37,00  |
| GO:0030098 | lymphocyte differentiation                                            | GO_BiologicalProcess-EBI-UniProt-GOA-ACAP-ARAP_08.05.2020_00h00 | 0,00987359 | 0,039683726 | 2,2993E-06 | 1,6588E-05 | [4, 5, 6, 7, 8, 9]   | Group071 | 6,58  | 25,00  |
| GO:0033077 | T cell differentiation in thymus                                      | GO_BiologicalProcess-EBI-UniProt-GOA-ACAP-ARAP_08.05.2020_00h00 | 0,00406016 | 0,022224842 | 2,2993E-06 | 1,6588E-05 | [6, 7, 8, 9, 10, 11] | Group071 | 11,39 | 9,00   |
| GO:0051145 | smooth muscle cell differentiation                                    | GO_BiologicalProcess-EBI-UniProt-GOA-ACAP-ARAP_08.05.2020_00h00 | 0,01034567 | 0,040908623 | 2,796E-06  | 1,8826E-05 | [5]                  | Group092 | 11,48 | 7,00   |

|            |                                                                                                              |                                                                 |            |             |            |            |                                        |          |       |        |
|------------|--------------------------------------------------------------------------------------------------------------|-----------------------------------------------------------------|------------|-------------|------------|------------|----------------------------------------|----------|-------|--------|
| GO:2000648 | positive regulation of stem cell proliferation                                                               | GO_BiologicalProcess-EBI-UniProt-GOA-ACAP-ARAP_08.05.2020_00h00 | 0,00936475 | 0,03869886  | 2,796E-06  | 1,8826E-05 | [4, 5, 6]                              | Group092 | 13,04 | 6,00   |
| GO:0045446 | endothelial cell differentiation                                                                             | GO_BiologicalProcess-EBI-UniProt-GOA-ACAP-ARAP_08.05.2020_00h00 | 0,0102085  | 0,040806182 | 2,796E-06  | 1,8826E-05 | [5, 6]                                 | Group092 | 9,35  | 10,00  |
| GO:2000047 | regulation of cell-cell adhesion mediated by cadherin                                                        | GO_BiologicalProcess-EBI-UniProt-GOA-ACAP-ARAP_08.05.2020_00h00 | 0,00146997 | 0,011115676 | 2,796E-06  | 1,8826E-05 | [5, 6]                                 | Group092 | 22,73 | 5,00   |
| GO:2000048 | negative regulation of cell-cell adhesion mediated by cadherin                                               | GO_BiologicalProcess-EBI-UniProt-GOA-ACAP-ARAP_08.05.2020_00h00 | 0,00609474 | 0,029314715 | 2,796E-06  | 1,8826E-05 | [5, 6, 7]                              | Group092 | 30,00 | 3,00   |
| GO:0010718 | positive regulation of epithelial to mesenchymal transition                                                  | GO_BiologicalProcess-EBI-UniProt-GOA-ACAP-ARAP_08.05.2020_00h00 | 0,01147846 | 0,043511376 | 2,796E-06  | 1,8826E-05 | [3, 4, 5, 6, 7, 8, 9, 10]              | Group092 | 12,50 | 6,00   |
| GO:0035886 | vascular smooth muscle cell differentiation                                                                  | GO_BiologicalProcess-EBI-UniProt-GOA-ACAP-ARAP_08.05.2020_00h00 | 0,00450535 | 0,023437398 | 2,796E-06  | 1,8826E-05 | [5, 6, 7, 8]                           | Group092 | 17,86 | 5,00   |
| GO:0060528 | secretory columnar luminal epithelial cell differentiation involved in prostate glandular acinus development | GO_BiologicalProcess-EBI-UniProt-GOA-ACAP-ARAP_08.05.2020_00h00 | 0,00024314 | 0,002743778 | 2,796E-06  | 1,8826E-05 | [4, 5, 6, 7, 8, 9]                     | Group092 | 75,00 | 3,00   |
| GO:0060976 | coronary vasculature development                                                                             | GO_BiologicalProcess-EBI-UniProt-GOA-ACAP-ARAP_08.05.2020_00h00 | 0,00344449 | 0,020051828 | 2,796E-06  | 1,8826E-05 | [4, 5, 6, 7, 8, 9]                     | Group092 | 14,00 | 7,00   |
| GO:0001570 | vasculogenesis                                                                                               | GO_BiologicalProcess-EBI-UniProt-GOA-ACAP-ARAP_08.05.2020_00h00 | 0,00884597 | 0,037290338 | 2,796E-06  | 1,8826E-05 | [4, 5, 6, 7, 8, 9, 10]                 | Group092 | 10,11 | 9,00   |
| GO:0048845 | venous blood vessel morphogenesis                                                                            | GO_BiologicalProcess-EBI-UniProt-GOA-ACAP-ARAP_08.05.2020_00h00 | 0,00439531 | 0,02319398  | 2,796E-06  | 1,8826E-05 | [5, 6, 7, 8, 9, 10]                    | Group092 | 33,33 | 3,00   |
| GO:0060947 | cardiac vascular smooth muscle cell differentiation                                                          | GO_BiologicalProcess-EBI-UniProt-GOA-ACAP-ARAP_08.05.2020_00h00 | 0,003019   | 0,018608693 | 2,796E-06  | 1,8826E-05 | [5, 6, 7, 8, 9, 10]                    | Group092 | 37,50 | 3,00   |
| GO:0035909 | aorta morphogenesis                                                                                          | GO_BiologicalProcess-EBI-UniProt-GOA-ACAP-ARAP_08.05.2020_00h00 | 0,00810163 | 0,03516297  | 2,796E-06  | 1,8826E-05 | [6, 7, 8, 9, 10, 11]                   | Group092 | 15,63 | 5,00   |
| GO:0019899 | enzyme binding                                                                                               | GO_MolecularFunction-EBI-UniProt-GOA-ACAP-ARAP_08.05.2020_00h00 | 3,3592E-06 | 5,86663E-05 | 3,3592E-06 | 1,9958E-05 | [3]                                    | Group051 | 5,77  | 137,00 |
| GO:0019900 | kinase binding                                                                                               | GO_MolecularFunction-EBI-UniProt-GOA-ACAP-ARAP_08.05.2020_00h00 | 0,00325059 | 0,019384639 | 3,3592E-06 | 1,9958E-05 | [4]                                    | Group051 | 6,01  | 47,00  |
| GO:0019901 | protein kinase binding                                                                                       | GO_MolecularFunction-EBI-UniProt-GOA-ACAP-ARAP_08.05.2020_00h00 | 0,01073362 | 0,041546736 | 3,3592E-06 | 1,9958E-05 | [5]                                    | Group051 | 5,81  | 40,00  |
| GO:0045815 | positive regulation of gene expression, epigenetic                                                           | GO_BiologicalProcess-EBI-UniProt-GOA-ACAP-ARAP_08.05.2020_00h00 | 4,6028E-05 | 0,000643077 | 3,2749E-06 | 2,0673E-05 | [5, 6, 7]                              | Group053 | 16,92 | 11,00  |
| GO:0031935 | regulation of chromatin silencing                                                                            | GO_BiologicalProcess-EBI-UniProt-GOA-ACAP-ARAP_08.05.2020_00h00 | 9,3095E-05 | 0,001167273 | 3,2749E-06 | 2,0673E-05 | [4, 5, 6, 7, 8, 9, 10, 11, 12, 13, 14] | Group053 | 30,00 | 6,00   |
| GO:0048096 | chromatin-mediated maintenance of transcription                                                              | GO_BiologicalProcess-EBI-UniProt-GOA-ACAP-ARAP_08.05.2020_00h00 | 0,00180454 | 0,013236315 | 3,2749E-06 | 2,0673E-05 | [6, 7, 8, 9, 10, 11, 12]               | Group053 | 28,57 | 4,00   |
| GO:0030374 | nuclear receptor transcription coactivator activity                                                          | GO_BiologicalProcess-EBI-UniProt-GOA-ACAP-ARAP_08.05.2020_00h00 | 7,2046E-05 | 0,000935317 | 4,6302E-06 | 2,598E-05  | [8, 9, 10, 11, 12]                     | Group084 | 15,00 | 12,00  |
| GO:0008134 | transcription factor binding                                                                                 | GO_MolecularFunction-EBI-UniProt-GOA-ACAP-ARAP_08.05.2020_00h00 | 1,4931E-05 | 0,00023302  | 4,6302E-06 | 2,598E-05  | [3]                                    | Group084 | 7,31  | 53,00  |
| GO:0045935 | positive regulation of nucleobase-containing compound metabolic process                                      | GO_BiologicalProcess-EBI-UniProt-GOA-ACAP-ARAP_08.05.2020_00h00 | 0,00017084 | 0,002004963 | 4,6302E-06 | 2,598E-05  | [4, 5, 6]                              | Group084 | 5,53  | 113,00 |
| GO:0051254 | positive regulation of RNA metabolic process                                                                 | GO_BiologicalProcess-EBI-UniProt-GOA-ACAP-ARAP_08.05.2020_00h00 | 0,0002428  | 0,002761146 | 4,6302E-06 | 2,598E-05  | [4, 5, 6, 7, 8]                        | Group084 | 5,57  | 104,00 |
| GO:1903508 | positive regulation of nucleic acid-templated transcription                                                  | GO_BiologicalProcess-EBI-UniProt-GOA-ACAP-ARAP_08.05.2020_00h00 | 9,8332E-05 | 0,001222489 | 4,6302E-06 | 2,598E-05  | [6, 7, 8, 9, 10]                       | Group084 | 5,73  | 102,00 |

|            |                                                                        |                                                                 |            |             |            |            |                    |          |       |       |
|------------|------------------------------------------------------------------------|-----------------------------------------------------------------|------------|-------------|------------|------------|--------------------|----------|-------|-------|
| GO:0003712 | transcription coregulator activity                                     | GO_BiologicalProcess-EBI-UniProt-GOA-ACAP-ARAP_08.05.2020_00h00 | 5,4984E-08 | 1,68046E-06 | 4,6302E-06 | 2,598E-05  | [7, 8, 9, 10]      | Group084 | 8,65  | 55,00 |
| GO:0003713 | transcription coactivator activity                                     | GO_BiologicalProcess-EBI-UniProt-GOA-ACAP-ARAP_08.05.2020_00h00 | 1,168E-05  | 0,000188293 | 4,6302E-06 | 2,598E-05  | [7, 8, 9, 10, 11]  | Group084 | 8,99  | 33,00 |
| GO:0003714 | transcription corepressor activity                                     | GO_BiologicalProcess-EBI-UniProt-GOA-ACAP-ARAP_08.05.2020_00h00 | 0,00295276 | 0,018277241 | 4,6302E-06 | 2,598E-05  | [7, 8, 9, 10, 11]  | Group084 | 7,87  | 20,00 |
| GO:0006367 | transcription initiation from RNA polymerase II promoter               | GO_BiologicalProcess-EBI-UniProt-GOA-ACAP-ARAP_08.05.2020_00h00 | 0,0006665  | 0,006562146 | 4,6302E-06 | 2,598E-05  | [7, 8, 9, 10, 11]  | Group084 | 9,13  | 19,00 |
| GO:0043966 | histone H3 acetylation                                                 | GO_BiologicalProcess-EBI-UniProt-GOA-ACAP-ARAP_08.05.2020_00h00 | 0,01034567 | 0,040908623 | 7,0972E-06 | 3,7727E-05 | [8, 9, 10, 11, 12] | Group075 | 11,48 | 7,00  |
| GO:0043543 | protein acylation                                                      | GO_BiologicalProcess-EBI-UniProt-GOA-ACAP-ARAP_08.05.2020_00h00 | 0,00368337 | 0,02110742  | 7,0972E-06 | 3,7727E-05 | [6, 7]             | Group075 | 7,72  | 20,00 |
| GO:0016570 | histone modification                                                   | GO_BiologicalProcess-EBI-UniProt-GOA-ACAP-ARAP_08.05.2020_00h00 | 0,00012397 | 0,00150305  | 7,0972E-06 | 3,7727E-05 | [6, 7, 8]          | Group075 | 7,63  | 37,00 |
| GO:0018205 | peptidyl-lysine modification                                           | GO_BiologicalProcess-EBI-UniProt-GOA-ACAP-ARAP_08.05.2020_00h00 | 2,6372E-06 | 4,83594E-05 | 7,0972E-06 | 3,7727E-05 | [7, 8]             | Group075 | 8,98  | 38,00 |
| GO:0006475 | internal protein amino acid acetylation                                | GO_BiologicalProcess-EBI-UniProt-GOA-ACAP-ARAP_08.05.2020_00h00 | 0,00191473 | 0,01390548  | 7,0972E-06 | 3,7727E-05 | [8, 9]             | Group075 | 9,04  | 16,00 |
| GO:0016573 | histone acetylation                                                    | GO_BiologicalProcess-EBI-UniProt-GOA-ACAP-ARAP_08.05.2020_00h00 | 0,00262382 | 0,01703164  | 7,0972E-06 | 3,7727E-05 | [7, 8, 9, 10, 11]  | Group075 | 9,04  | 15,00 |
| GO:0008134 | transcription factor binding                                           | GO_MolecularFunction-EBI-UniProt-GOA-ACAP-ARAP_08.05.2020_00h00 | 1,4931E-05 | 0,00023302  | 1,314E-05  | 6,6356E-05 | [3]                | Group098 | 7,31  | 53,00 |
| GO:0030522 | intracellular receptor signaling pathway                               | GO_BiologicalProcess-EBI-UniProt-GOA-ACAP-ARAP_08.05.2020_00h00 | 0,00076096 | 0,007296289 | 1,314E-05  | 6,6356E-05 | [3, 4, 5]          | Group098 | 8,14  | 24,00 |
| GO:0051427 | hormone receptor binding                                               | GO_MolecularFunction-EBI-UniProt-GOA-ACAP-ARAP_08.05.2020_00h00 | 0,00578301 | 0,028661067 | 1,314E-05  | 6,6356E-05 | [4]                | Group098 | 8,08  | 16,00 |
| GO:0140297 | DNA-binding transcription factor binding                               | GO_MolecularFunction-EBI-UniProt-GOA-ACAP-ARAP_08.05.2020_00h00 | 0,00583479 | 0,028820314 | 1,314E-05  | 6,6356E-05 | [4]                | Group098 | 6,79  | 26,00 |
| GO:0009755 | hormone-mediated signaling pathway                                     | GO_BiologicalProcess-EBI-UniProt-GOA-ACAP-ARAP_08.05.2020_00h00 | 0,01050162 | 0,041192181 | 1,314E-05  | 6,6356E-05 | [3, 4, 5, 6]       | Group098 | 7,26  | 18,00 |
| GO:0032870 | cellular response to hormone stimulus                                  | GO_BiologicalProcess-EBI-UniProt-GOA-ACAP-ARAP_08.05.2020_00h00 | 0,00399949 | 0,021974724 | 1,314E-05  | 6,6356E-05 | [4, 5]             | Group098 | 5,97  | 46,00 |
| GO:0048384 | retinoic acid receptor signaling pathway                               | GO_BiologicalProcess-EBI-UniProt-GOA-ACAP-ARAP_08.05.2020_00h00 | 0,00021557 | 0,002490113 | 1,314E-05  | 6,6356E-05 | [4, 5, 6]          | Group098 | 21,88 | 7,00  |
| GO:0061629 | RNA polymerase II-specific DNA-binding transcription factor binding    | GO_MolecularFunction-EBI-UniProt-GOA-ACAP-ARAP_08.05.2020_00h00 | 0,00928244 | 0,038576037 | 1,314E-05  | 6,6356E-05 | [5]                | Group098 | 6,98  | 21,00 |
| GO:0071383 | cellular response to steroid hormone stimulus                          | GO_BiologicalProcess-EBI-UniProt-GOA-ACAP-ARAP_08.05.2020_00h00 | 0,00606695 | 0,029373631 | 1,314E-05  | 6,6356E-05 | [5, 6]             | Group098 | 7,38  | 20,00 |
| GO:0030518 | intracellular steroid hormone receptor signaling pathway               | GO_BiologicalProcess-EBI-UniProt-GOA-ACAP-ARAP_08.05.2020_00h00 | 0,00366435 | 0,021080799 | 1,314E-05  | 6,6356E-05 | [4, 5, 6, 7, 8]    | Group098 | 9,35  | 13,00 |
| GO:0016922 | nuclear receptor binding                                               | GO_MolecularFunction-EBI-UniProt-GOA-ACAP-ARAP_08.05.2020_00h00 | 0,00651478 | 0,030730493 | 1,314E-05  | 6,6356E-05 | [6, 7]             | Group098 | 9,48  | 11,00 |
| GO:0033143 | regulation of intracellular steroid hormone receptor signaling pathway | GO_BiologicalProcess-EBI-UniProt-GOA-ACAP-ARAP_08.05.2020_00h00 | 0,00136584 | 0,01060153  | 1,314E-05  | 6,6356E-05 | [4, 5, 6, 7, 8, 9] | Group098 | 12,35 | 10,00 |
| GO:0030521 | androgen receptor signaling pathway                                    | GO_BiologicalProcess-EBI-UniProt-GOA-ACAP-ARAP_08.05.2020_00h00 | 0,01330857 | 0,047387552 | 1,314E-05  | 6,6356E-05 | [5, 6, 7, 8, 9]    | Group098 | 10,94 | 7,00  |
| GO:0050847 | progesterone receptor signaling pathway                                | GO_BiologicalProcess-EBI-UniProt-GOA-ACAP-ARAP_08.05.2020_00h00 | 0,003019   | 0,018608693 | 1,314E-05  | 6,6356E-05 | [5, 6, 7, 8, 9]    | Group098 | 37,50 | 3,00  |



|            |                                                                          |                                                                 |            |             |            |            |                                  |          |       |       |
|------------|--------------------------------------------------------------------------|-----------------------------------------------------------------|------------|-------------|------------|------------|----------------------------------|----------|-------|-------|
| GO:0033146 | regulation of intracellular estrogen receptor signaling pathway          | GO_BiologicalProcess-EBI-UniProt-GOA-ACAP-ARAP_08.05.2020_00h00 | 0,00841935 | 0,036114566 | 1,314E-05  | 6,6356E-05 | [5, 6, 7, 8, 9, 10]              | Group098 | 13,33 | 6,00  |
| GO:0033148 | positive regulation of intracellular estrogen receptor signaling pathway | GO_BiologicalProcess-EBI-UniProt-GOA-ACAP-ARAP_08.05.2020_00h00 | 0,00307946 | 0,018514641 | 1,314E-05  | 6,6356E-05 | [5, 6, 7, 8, 9, 10, 11]          | Group098 | 25,00 | 4,00  |
| GO:0050772 | positive regulation of axonogenesis                                      | GO_BiologicalProcess-EBI-UniProt-GOA-ACAP-ARAP_08.05.2020_00h00 | 0,0013666  | 0,010551599 | 1,8581E-05 | 8,9364E-05 | [6, 7, 8, 9, 10, 11, 12, 13, 14] | Group086 | 11,58 | 11,00 |
| GO:0060560 | developmental growth involved in morphogenesis                           | GO_BiologicalProcess-EBI-UniProt-GOA-ACAP-ARAP_08.05.2020_00h00 | 0,00172929 | 0,012748064 | 1,8581E-05 | 8,9364E-05 | [3, 4]                           | Group086 | 8,08  | 21,00 |
| GO:0001558 | regulation of cell growth                                                | GO_BiologicalProcess-EBI-UniProt-GOA-ACAP-ARAP_08.05.2020_00h00 | 0,00221933 | 0,015357364 | 1,8581E-05 | 8,9364E-05 | [3, 4, 5]                        | Group086 | 6,89  | 31,00 |
| GO:0032535 | regulation of cellular component size                                    | GO_BiologicalProcess-EBI-UniProt-GOA-ACAP-ARAP_08.05.2020_00h00 | 0,00677551 | 0,031158835 | 1,8581E-05 | 8,9364E-05 | [4]                              | Group086 | 6,63  | 27,00 |
| GO:0061138 | morphogenesis of a branching epithelium                                  | GO_BiologicalProcess-EBI-UniProt-GOA-ACAP-ARAP_08.05.2020_00h00 | 0,00284655 | 0,017769769 | 1,8581E-05 | 8,9364E-05 | [3, 4, 5, 6]                     | Group086 | 8,46  | 17,00 |
| GO:0010720 | positive regulation of cell development                                  | GO_BiologicalProcess-EBI-UniProt-GOA-ACAP-ARAP_08.05.2020_00h00 | 0,01184334 | 0,044209119 | 1,8581E-05 | 8,9364E-05 | [4, 5, 6]                        | Group086 | 5,91  | 36,00 |
| GO:0060562 | epithelial tube morphogenesis                                            | GO_BiologicalProcess-EBI-UniProt-GOA-ACAP-ARAP_08.05.2020_00h00 | 0,00102574 | 0,009010539 | 1,8581E-05 | 8,9364E-05 | [4, 5, 6]                        | Group086 | 7,61  | 27,00 |
| GO:0048754 | branching morphogenesis of an epithelial tube                            | GO_BiologicalProcess-EBI-UniProt-GOA-ACAP-ARAP_08.05.2020_00h00 | 0,00247505 | 0,016355416 | 1,8581E-05 | 8,9364E-05 | [4, 5, 6, 7]                     | Group086 | 9,09  | 15,00 |
| GO:0010770 | positive regulation of cell morphogenesis involved in differentiation    | GO_BiologicalProcess-EBI-UniProt-GOA-ACAP-ARAP_08.05.2020_00h00 | 0,00329477 | 0,019333733 | 1,8581E-05 | 8,9364E-05 | [5, 6, 7]                        | Group086 | 8,82  | 15,00 |
| GO:0050769 | positive regulation of neurogenesis                                      | GO_BiologicalProcess-EBI-UniProt-GOA-ACAP-ARAP_08.05.2020_00h00 | 0,0070058  | 0,03172072  | 1,8581E-05 | 8,9364E-05 | [4, 5, 6, 7, 8, 9]               | Group086 | 6,26  | 33,00 |
| GO:0030374 | nuclear receptor transcription coactivator activity                      | GO_BiologicalProcess-EBI-UniProt-GOA-ACAP-ARAP_08.05.2020_00h00 | 7,2046E-05 | 0,000935317 | 2,8517E-05 | 0,00013092 | [8, 9, 10, 11, 12]               | Group063 | 15,00 | 12,00 |
| GO:0071391 | cellular response to estrogen stimulus                                   | GO_BiologicalProcess-EBI-UniProt-GOA-ACAP-ARAP_08.05.2020_00h00 | 0,00092442 | 0,008475746 | 2,8517E-05 | 0,00013092 | [3, 4]                           | Group063 | 25,00 | 5,00  |
| GO:0045445 | myoblast differentiation                                                 | GO_BiologicalProcess-EBI-UniProt-GOA-ACAP-ARAP_08.05.2020_00h00 | 0,00884597 | 0,037290338 | 2,8517E-05 | 0,00013092 | [4]                              | Group063 | 10,11 | 9,00  |
| GO:0002153 | steroid receptor RNA activator RNA binding                               | GO_MolecularFunction-EBI-UniProt-GOA-ACAP-ARAP_08.05.2020_00h00 | 3,4908E-05 | 0,000502063 | 2,8517E-05 | 0,00013092 | [6]                              | Group063 | 66,67 | 4,00  |
| GO:0003713 | transcription coactivator activity                                       | GO_BiologicalProcess-EBI-UniProt-GOA-ACAP-ARAP_08.05.2020_00h00 | 1,168E-05  | 0,000188293 | 2,8517E-05 | 0,00013092 | [7, 8, 9, 10, 11]                | Group063 | 8,99  | 33,00 |
| GO:0033043 | regulation of organelle organization                                     | GO_BiologicalProcess-EBI-UniProt-GOA-ACAP-ARAP_08.05.2020_00h00 | 0,00119093 | 0,009706078 | 5,7509E-05 | 0,00025254 | [4, 5]                           | Group067 | 5,62  | 78,00 |
| GO:0010638 | positive regulation of organelle organization                            | GO_BiologicalProcess-EBI-UniProt-GOA-ACAP-ARAP_08.05.2020_00h00 | 0,00249017 | 0,016381536 | 5,7509E-05 | 0,00025254 | [4, 5, 6]                        | Group067 | 6,23  | 43,00 |
| GO:0033044 | regulation of chromosome organization                                    | GO_BiologicalProcess-EBI-UniProt-GOA-ACAP-ARAP_08.05.2020_00h00 | 0,0056442  | 0,028067946 | 5,7509E-05 | 0,00025254 | [5, 6]                           | Group067 | 6,81  | 26,00 |
| GO:1902275 | regulation of chromatin organization                                     | GO_BiologicalProcess-EBI-UniProt-GOA-ACAP-ARAP_08.05.2020_00h00 | 0,00835802 | 0,035956629 | 5,7509E-05 | 0,00025254 | [5, 6, 7]                        | Group067 | 7,77  | 16,00 |
| GO:0016570 | histone modification                                                     | GO_BiologicalProcess-EBI-UniProt-GOA-ACAP-ARAP_08.05.2020_00h00 | 0,00012397 | 0,00150305  | 5,7509E-05 | 0,00025254 | [6, 7, 8]                        | Group067 | 7,63  | 37,00 |
| GO:0019827 | stem cell population maintenance                                         | GO_BiologicalProcess-EBI-UniProt-GOA-ACAP-ARAP_08.05.2020_00h00 | 0,00086558 | 0,00808796  | 6,0089E-05 | 0,00025287 | [2, 3]                           | Group101 | 9,44  | 17,00 |

|            |                                                                |                                                                 |            |             |            |            |                       |          |       |       |
|------------|----------------------------------------------------------------|-----------------------------------------------------------------|------------|-------------|------------|------------|-----------------------|----------|-------|-------|
| GO:0035019 | somatic stem cell population maintenance                       | GO_BiologicalProcess-EBI-UniProt-GOA-ACAP-ARAP_08.05.2020_00h00 | 0,00150131 | 0,011236882 | 6,0089E-05 | 0,00025287 | [3, 4]                | Group101 | 12,20 | 10,00 |
| GO:0048729 | tissue morphogenesis                                           | GO_BiologicalProcess-EBI-UniProt-GOA-ACAP-ARAP_08.05.2020_00h00 | 0,01362663 | 0,048285682 | 6,0089E-05 | 0,00025287 | [3, 4]                | Group101 | 5,69  | 41,00 |
| GO:0048103 | somatic stem cell division                                     | GO_BiologicalProcess-EBI-UniProt-GOA-ACAP-ARAP_08.05.2020_00h00 | 0,01052948 | 0,041191343 | 6,0089E-05 | 0,00025287 | [4]                   | Group101 | 25,00 | 3,00  |
| GO:0001655 | urogenital system development                                  | GO_BiologicalProcess-EBI-UniProt-GOA-ACAP-ARAP_08.05.2020_00h00 | 0,01173816 | 0,044267047 | 6,0089E-05 | 0,00025287 | [4, 5]                | Group101 | 6,56  | 24,00 |
| GO:0060541 | respiratory system development                                 | GO_BiologicalProcess-EBI-UniProt-GOA-ACAP-ARAP_08.05.2020_00h00 | 0,00734388 | 0,032548264 | 6,0089E-05 | 0,00025287 | [4, 5]                | Group101 | 7,69  | 17,00 |
| GO:0061138 | morphogenesis of a branching epithelium                        | GO_BiologicalProcess-EBI-UniProt-GOA-ACAP-ARAP_08.05.2020_00h00 | 0,00284655 | 0,017769769 | 6,0089E-05 | 0,00025287 | [3, 4, 5, 6]          | Group101 | 8,46  | 17,00 |
| GO:2000736 | regulation of stem cell differentiation                        | GO_BiologicalProcess-EBI-UniProt-GOA-ACAP-ARAP_08.05.2020_00h00 | 0,01182202 | 0,044355243 | 6,0089E-05 | 0,00025287 | [4, 5]                | Group101 | 8,73  | 11,00 |
| GO:0030856 | regulation of epithelial cell differentiation                  | GO_BiologicalProcess-EBI-UniProt-GOA-ACAP-ARAP_08.05.2020_00h00 | 0,00151781 | 0,011302683 | 6,0089E-05 | 0,00025287 | [4, 5, 6]             | Group101 | 9,55  | 15,00 |
| GO:0048732 | gland development                                              | GO_BiologicalProcess-EBI-UniProt-GOA-ACAP-ARAP_08.05.2020_00h00 | 0,00223689 | 0,015262903 | 6,0089E-05 | 0,00025287 | [4, 5, 6]             | Group101 | 6,69  | 34,00 |
| GO:0051145 | smooth muscle cell differentiation                             | GO_BiologicalProcess-EBI-UniProt-GOA-ACAP-ARAP_08.05.2020_00h00 | 0,01034567 | 0,040908623 | 6,0089E-05 | 0,00025287 | [5]                   | Group101 | 11,48 | 7,00  |
| GO:0060485 | mesenchyme development                                         | GO_BiologicalProcess-EBI-UniProt-GOA-ACAP-ARAP_08.05.2020_00h00 | 0,00693329 | 0,031685803 | 6,0089E-05 | 0,00025287 | [4, 5, 6]             | Group101 | 7,17  | 21,00 |
| GO:0060562 | epithelial tube morphogenesis                                  | GO_BiologicalProcess-EBI-UniProt-GOA-ACAP-ARAP_08.05.2020_00h00 | 0,00102574 | 0,009010539 | 6,0089E-05 | 0,00025287 | [4, 5, 6]             | Group101 | 7,61  | 27,00 |
| GO:0061009 | common bile duct development                                   | GO_BiologicalProcess-EBI-UniProt-GOA-ACAP-ARAP_08.05.2020_00h00 | 3,4908E-05 | 0,000502063 | 6,0089E-05 | 0,00025287 | [4, 5, 6]             | Group101 | 66,67 | 4,00  |
| GO:2000737 | negative regulation of stem cell differentiation               | GO_BiologicalProcess-EBI-UniProt-GOA-ACAP-ARAP_08.05.2020_00h00 | 0,00222151 | 0,015300271 | 6,0089E-05 | 0,00025287 | [4, 5, 6]             | Group101 | 20,83 | 5,00  |
| GO:0003279 | cardiac septum development                                     | GO_BiologicalProcess-EBI-UniProt-GOA-ACAP-ARAP_08.05.2020_00h00 | 0,00886469 | 0,03726219  | 6,0089E-05 | 0,00025287 | [3, 4, 6, 7, 8]       | Group101 | 9,09  | 11,00 |
| GO:0001822 | kidney development                                             | GO_BiologicalProcess-EBI-UniProt-GOA-ACAP-ARAP_08.05.2020_00h00 | 0,01183102 | 0,044275783 | 6,0089E-05 | 0,00025287 | [4, 5, 6, 7]          | Group101 | 6,82  | 21,00 |
| GO:0030857 | negative regulation of epithelial cell differentiation         | GO_BiologicalProcess-EBI-UniProt-GOA-ACAP-ARAP_08.05.2020_00h00 | 2,2595E-05 | 0,000338235 | 6,0089E-05 | 0,00025287 | [4, 5, 6, 7]          | Group101 | 20,00 | 10,00 |
| GO:0048754 | branching morphogenesis of an epithelial tube                  | GO_BiologicalProcess-EBI-UniProt-GOA-ACAP-ARAP_08.05.2020_00h00 | 0,00247505 | 0,016355416 | 6,0089E-05 | 0,00025287 | [4, 5, 6, 7]          | Group101 | 9,09  | 15,00 |
| GO:0061323 | cell proliferation involved in heart morphogenesis             | GO_BiologicalProcess-EBI-UniProt-GOA-ACAP-ARAP_08.05.2020_00h00 | 0,00092442 | 0,008475746 | 6,0089E-05 | 0,00025287 | [3, 5, 6, 7, 8]       | Group101 | 25,00 | 5,00  |
| GO:0021783 | preganglionic parasympathetic fiber development                | GO_BiologicalProcess-EBI-UniProt-GOA-ACAP-ARAP_08.05.2020_00h00 | 0,00722575 | 0,032317616 | 6,0089E-05 | 0,00025287 | [4, 5, 6, 7, 8]       | Group101 | 20,00 | 4,00  |
| GO:0060674 | placenta blood vessel development                              | GO_BiologicalProcess-EBI-UniProt-GOA-ACAP-ARAP_08.05.2020_00h00 | 0,00412203 | 0,022396339 | 6,0089E-05 | 0,00025287 | [3, 4, 5, 6, 7, 8, 9] | Group101 | 15,38 | 6,00  |
| GO:0061005 | cell differentiation involved in kidney development            | GO_BiologicalProcess-EBI-UniProt-GOA-ACAP-ARAP_08.05.2020_00h00 | 0,01226081 | 0,04496653  | 6,0089E-05 | 0,00025287 | [4, 5, 6, 7, 8]       | Group101 | 11,11 | 7,00  |
| GO:0090183 | regulation of kidney development                               | GO_BiologicalProcess-EBI-UniProt-GOA-ACAP-ARAP_08.05.2020_00h00 | 0,00865794 | 0,036708646 | 6,0089E-05 | 0,00025287 | [4, 5, 6, 7, 8]       | Group101 | 11,86 | 7,00  |
| GO:2000048 | negative regulation of cell-cell adhesion mediated by cadherin | GO_BiologicalProcess-EBI-UniProt-GOA-ACAP-ARAP_08.05.2020_00h00 | 0,00609474 | 0,029314715 | 6,0089E-05 | 0,00025287 | [5, 6, 7]             | Group101 | 30,00 | 3,00  |

|            |                                                                         |                                                                 |            |             |            |            |                                     |          |       |       |
|------------|-------------------------------------------------------------------------|-----------------------------------------------------------------|------------|-------------|------------|------------|-------------------------------------|----------|-------|-------|
| GO:0035886 | vascular smooth muscle cell differentiation                             | GO_BiologicalProcess-EBI-UniProt-GOA-ACAP-ARAP_08.05.2020_00h00 | 0,00450535 | 0,023437398 | 6,0089E-05 | 0,00025287 | [5, 6, 7, 8]                        | Group101 | 17,86 | 5,00  |
| GO:0060976 | coronary vasculature development                                        | GO_BiologicalProcess-EBI-UniProt-GOA-ACAP-ARAP_08.05.2020_00h00 | 0,00344449 | 0,020051828 | 6,0089E-05 | 0,00025287 | [4, 5, 6, 7, 8, 9]                  | Group101 | 14,00 | 7,00  |
| GO:0072049 | comma-shaped body morphogenesis                                         | GO_BiologicalProcess-EBI-UniProt-GOA-ACAP-ARAP_08.05.2020_00h00 | 0,00194417 | 0,014049736 | 6,0089E-05 | 0,00025287 | [3, 4, 5, 6, 7, 8, 9, 10]           | Group101 | 42,86 | 3,00  |
| GO:0072050 | S-shaped body morphogenesis                                             | GO_BiologicalProcess-EBI-UniProt-GOA-ACAP-ARAP_08.05.2020_00h00 | 0,00609474 | 0,029314715 | 6,0089E-05 | 0,00025287 | [3, 4, 5, 6, 7, 8, 9, 10]           | Group101 | 30,00 | 3,00  |
| GO:0072073 | kidney epithelium development                                           | GO_BiologicalProcess-EBI-UniProt-GOA-ACAP-ARAP_08.05.2020_00h00 | 0,01053228 | 0,041092683 | 6,0089E-05 | 0,00025287 | [5, 6, 7, 8]                        | Group101 | 8,23  | 13,00 |
| GO:2000826 | regulation of heart morphogenesis                                       | GO_BiologicalProcess-EBI-UniProt-GOA-ACAP-ARAP_08.05.2020_00h00 | 0,00754438 | 0,033136562 | 6,0089E-05 | 0,00025287 | [5, 6, 7, 8]                        | Group101 | 13,64 | 6,00  |
| GO:0072012 | glomerulus vasculature development                                      | GO_BiologicalProcess-EBI-UniProt-GOA-ACAP-ARAP_08.05.2020_00h00 | 0,00382396 | 0,021575958 | 6,0089E-05 | 0,00025287 | [4, 5, 6, 7, 8, 9, 10]              | Group101 | 18,52 | 5,00  |
| GO:0060251 | regulation of glial cell proliferation                                  | GO_BiologicalProcess-EBI-UniProt-GOA-ACAP-ARAP_08.05.2020_00h00 | 0,01048958 | 0,041366164 | 6,0089E-05 | 0,00025287 | [4, 5, 7, 8, 9, 10]                 | Group101 | 14,71 | 5,00  |
| GO:0014014 | negative regulation of gliogenesis                                      | GO_BiologicalProcess-EBI-UniProt-GOA-ACAP-ARAP_08.05.2020_00h00 | 0,01147846 | 0,043511376 | 6,0089E-05 | 0,00025287 | [5, 6, 7, 8, 9, 10]                 | Group101 | 12,50 | 6,00  |
| GO:0048845 | venous blood vessel morphogenesis                                       | GO_BiologicalProcess-EBI-UniProt-GOA-ACAP-ARAP_08.05.2020_00h00 | 0,00439531 | 0,02319398  | 6,0089E-05 | 0,00025287 | [5, 6, 7, 8, 9, 10]                 | Group101 | 33,33 | 3,00  |
| GO:0060947 | cardiac vascular smooth muscle cell differentiation                     | GO_BiologicalProcess-EBI-UniProt-GOA-ACAP-ARAP_08.05.2020_00h00 | 0,003019   | 0,018608693 | 6,0089E-05 | 0,00025287 | [5, 6, 7, 8, 9, 10]                 | Group101 | 37,50 | 3,00  |
| GO:0061101 | neuroendocrine cell differentiation                                     | GO_BiologicalProcess-EBI-UniProt-GOA-ACAP-ARAP_08.05.2020_00h00 | 0,00439531 | 0,02319398  | 6,0089E-05 | 0,00025287 | [7, 8]                              | Group101 | 33,33 | 3,00  |
| GO:0072080 | nephron tubule development                                              | GO_BiologicalProcess-EBI-UniProt-GOA-ACAP-ARAP_08.05.2020_00h00 | 0,00224538 | 0,015179563 | 6,0089E-05 | 0,00025287 | [5, 6, 7, 8, 9, 10]                 | Group101 | 10,89 | 11,00 |
| GO:1902747 | negative regulation of lens fiber cell differentiation                  | GO_BiologicalProcess-EBI-UniProt-GOA-ACAP-ARAP_08.05.2020_00h00 | 0,00114476 | 0,009434626 | 6,0089E-05 | 0,00025287 | [3, 4, 5, 6, 7, 8, 9, 10, 11, 12]   | Group101 | 50,00 | 3,00  |
| GO:0035904 | aorta development                                                       | GO_BiologicalProcess-EBI-UniProt-GOA-ACAP-ARAP_08.05.2020_00h00 | 0,00789435 | 0,03457018  | 6,0089E-05 | 0,00025287 | [5, 7, 8, 9, 10]                    | Group101 | 12,07 | 7,00  |
| GO:0002328 | pro-B cell differentiation                                              | GO_BiologicalProcess-EBI-UniProt-GOA-ACAP-ARAP_08.05.2020_00h00 | 6,1558E-05 | 0,000843971 | 6,0089E-05 | 0,00025287 | [6, 7, 8, 9, 10]                    | Group101 | 41,67 | 5,00  |
| GO:0001657 | ureteric bud development                                                | GO_BiologicalProcess-EBI-UniProt-GOA-ACAP-ARAP_08.05.2020_00h00 | 0,00437197 | 0,023237992 | 6,0089E-05 | 0,00025287 | [5, 6, 8, 9, 10, 11]                | Group101 | 10,00 | 11,00 |
| GO:0003266 | regulation of secondary heart field cardioblast proliferation           | GO_BiologicalProcess-EBI-UniProt-GOA-ACAP-ARAP_08.05.2020_00h00 | 0,00042998 | 0,004570884 | 6,0089E-05 | 0,00025287 | [6, 7, 8, 9, 10, 11]                | Group101 | 40,00 | 4,00  |
| GO:0035909 | aorta morphogenesis                                                     | GO_BiologicalProcess-EBI-UniProt-GOA-ACAP-ARAP_08.05.2020_00h00 | 0,00810163 | 0,03516297  | 6,0089E-05 | 0,00025287 | [6, 7, 8, 9, 10, 11]                | Group101 | 15,63 | 5,00  |
| GO:0048710 | regulation of astrocyte differentiation                                 | GO_BiologicalProcess-EBI-UniProt-GOA-ACAP-ARAP_08.05.2020_00h00 | 0,00706214 | 0,031877402 | 6,0089E-05 | 0,00025287 | [6, 7, 8, 9, 10, 11]                | Group101 | 16,13 | 5,00  |
| GO:2000973 | regulation of pro-B cell differentiation                                | GO_BiologicalProcess-EBI-UniProt-GOA-ACAP-ARAP_08.05.2020_00h00 | 0,00015279 | 0,001822294 | 6,0089E-05 | 0,00025287 | [6, 7, 8, 9, 10, 11]                | Group101 | 50,00 | 4,00  |
| GO:0045608 | negative regulation of inner ear auditory receptor cell differentiation | GO_BiologicalProcess-EBI-UniProt-GOA-ACAP-ARAP_08.05.2020_00h00 | 0,00058983 | 0,005967495 | 6,0089E-05 | 0,00025287 | [5, 6, 7, 8, 9, 10, 11, 12, 13]     | Group101 | 60,00 | 3,00  |
| GO:0060677 | ureteric bud elongation                                                 | GO_BiologicalProcess-EBI-UniProt-GOA-ACAP-ARAP_08.05.2020_00h00 | 0,00439531 | 0,02319398  | 6,0089E-05 | 0,00025287 | [4, 5, 7, 8, 9, 10, 11, 12, 13, 14] | Group101 | 33,33 | 3,00  |
| GO:0060675 | ureteric bud morphogenesis                                              | GO_BiologicalProcess-EBI-UniProt-GOA-ACAP-ARAP_08.05.2020_00h00 | 0,00194483 | 0,013985601 | 6,0089E-05 | 0,00025287 | [6, 7, 8, 9, 10, 11, 12, 13]        | Group101 | 12,68 | 9,00  |

|            |                                                                |                                                                 |            |             |            |            |                         |          |       |       |
|------------|----------------------------------------------------------------|-----------------------------------------------------------------|------------|-------------|------------|------------|-------------------------|----------|-------|-------|
| GO:0033365 | protein localization to organelle                              | GO_BiologicalProcess-EBI-UniProt-GOA-ACAP-ARAP_08.05.2020_00h00 | 6,7926E-05 | 0,00089773  | 6,7926E-05 | 0,00027442 | [5]                     | Group052 | 6,44  | 67,00 |
| GO:0034504 | protein localization to nucleus                                | GO_BiologicalProcess-EBI-UniProt-GOA-ACAP-ARAP_08.05.2020_00h00 | 0,00091803 | 0,008470153 | 6,7926E-05 | 0,00027442 | [6]                     | Group052 | 8,03  | 24,00 |
| GO:1900180 | regulation of protein localization to nucleus                  | GO_BiologicalProcess-EBI-UniProt-GOA-ACAP-ARAP_08.05.2020_00h00 | 0,00344332 | 0,020124931 | 6,7926E-05 | 0,00027442 | [5, 6, 7]               | Group052 | 9,42  | 13,00 |
| GO:0022402 | cell cycle process                                             | GO_BiologicalProcess-EBI-UniProt-GOA-ACAP-ARAP_08.05.2020_00h00 | 0,00373411 | 0,021232305 | 8,4728E-05 | 0,00032913 | [2, 3]                  | Group100 | 5,38  | 78,00 |
| GO:0000278 | mitotic cell cycle                                             | GO_BiologicalProcess-EBI-UniProt-GOA-ACAP-ARAP_08.05.2020_00h00 | 4,3179E-05 | 0,000609079 | 8,4728E-05 | 0,00032913 | [3]                     | Group100 | 6,43  | 71,00 |
| GO:0051726 | regulation of cell cycle                                       | GO_BiologicalProcess-EBI-UniProt-GOA-ACAP-ARAP_08.05.2020_00h00 | 0,00115141 | 0,009436447 | 8,4728E-05 | 0,00032913 | [3, 4]                  | Group100 | 5,69  | 74,00 |
| GO:1903047 | mitotic cell cycle process                                     | GO_BiologicalProcess-EBI-UniProt-GOA-ACAP-ARAP_08.05.2020_00h00 | 0,00106744 | 0,008948199 | 8,4728E-05 | 0,00032913 | [3, 4]                  | Group100 | 6,10  | 55,00 |
| GO:0045786 | negative regulation of cell cycle                              | GO_BiologicalProcess-EBI-UniProt-GOA-ACAP-ARAP_08.05.2020_00h00 | 0,01142227 | 0,043636654 | 8,4728E-05 | 0,00032913 | [3, 4, 5]               | Group100 | 5,86  | 38,00 |
| GO:0000075 | cell cycle checkpoint                                          | GO_BiologicalProcess-EBI-UniProt-GOA-ACAP-ARAP_08.05.2020_00h00 | 0,01304005 | 0,046772026 | 8,4728E-05 | 0,00032913 | [2, 4, 5, 6]            | Group100 | 7,23  | 17,00 |
| GO:0007346 | regulation of mitotic cell cycle                               | GO_BiologicalProcess-EBI-UniProt-GOA-ACAP-ARAP_08.05.2020_00h00 | 0,00024562 | 0,002750539 | 8,4728E-05 | 0,00032913 | [4, 5]                  | Group100 | 6,76  | 48,00 |
| GO:0044843 | cell cycle G1/S phase transition                               | GO_BiologicalProcess-EBI-UniProt-GOA-ACAP-ARAP_08.05.2020_00h00 | 0,01147434 | 0,043721698 | 8,4728E-05 | 0,00032913 | [4, 5]                  | Group100 | 6,94  | 20,00 |
| GO:0007093 | mitotic cell cycle checkpoint                                  | GO_BiologicalProcess-EBI-UniProt-GOA-ACAP-ARAP_08.05.2020_00h00 | 0,00980666 | 0,039631858 | 8,4728E-05 | 0,00032913 | [3, 4, 5, 6, 7]         | Group100 | 8,05  | 14,00 |
| GO:0045930 | negative regulation of mitotic cell cycle                      | GO_BiologicalProcess-EBI-UniProt-GOA-ACAP-ARAP_08.05.2020_00h00 | 0,01292284 | 0,046465218 | 8,4728E-05 | 0,00032913 | [4, 5, 6]               | Group100 | 6,67  | 22,00 |
| GO:0045931 | positive regulation of mitotic cell cycle                      | GO_BiologicalProcess-EBI-UniProt-GOA-ACAP-ARAP_08.05.2020_00h00 | 0,01106744 | 0,042502429 | 8,4728E-05 | 0,00032913 | [4, 5, 6]               | Group100 | 8,18  | 13,00 |
| GO:0031570 | DNA integrity checkpoint                                       | GO_BiologicalProcess-EBI-UniProt-GOA-ACAP-ARAP_08.05.2020_00h00 | 0,00410062 | 0,022362851 | 8,4728E-05 | 0,00032913 | [3, 5, 6, 7]            | Group100 | 8,62  | 15,00 |
| GO:0140014 | mitotic nuclear division                                       | GO_BiologicalProcess-EBI-UniProt-GOA-ACAP-ARAP_08.05.2020_00h00 | 0,00220162 | 0,015379864 | 8,4728E-05 | 0,00032913 | [4, 5, 7]               | Group100 | 7,77  | 22,00 |
| GO:1901988 | negative regulation of cell cycle phase transition             | GO_BiologicalProcess-EBI-UniProt-GOA-ACAP-ARAP_08.05.2020_00h00 | 0,0141845  | 0,04954442  | 8,4728E-05 | 0,00032913 | [4, 5, 6, 7]            | Group100 | 7,03  | 18,00 |
| GO:0000077 | DNA damage checkpoint                                          | GO_BiologicalProcess-EBI-UniProt-GOA-ACAP-ARAP_08.05.2020_00h00 | 0,01280023 | 0,046251085 | 8,4728E-05 | 0,00032913 | [4, 5, 6, 7, 8]         | Group100 | 8,02  | 13,00 |
| GO:0030330 | DNA damage response, signal transduction by p53 class mediator | GO_BiologicalProcess-EBI-UniProt-GOA-ACAP-ARAP_08.05.2020_00h00 | 0,00694048 | 0,031620145 | 8,4728E-05 | 0,00032913 | [5, 6, 7]               | Group100 | 9,40  | 11,00 |
| GO:0006270 | DNA replication initiation                                     | GO_BiologicalProcess-EBI-UniProt-GOA-ACAP-ARAP_08.05.2020_00h00 | 0,00754438 | 0,033136562 | 8,4728E-05 | 0,00032913 | [5, 6, 7, 8]            | Group100 | 13,64 | 6,00  |
| GO:0044773 | mitotic DNA damage checkpoint                                  | GO_BiologicalProcess-EBI-UniProt-GOA-ACAP-ARAP_08.05.2020_00h00 | 0,00262383 | 0,016956635 | 8,4728E-05 | 0,00032913 | [5, 6, 7, 8, 9]         | Group100 | 10,68 | 11,00 |
| GO:2000134 | negative regulation of G1/S transition of mitotic cell cycle   | GO_BiologicalProcess-EBI-UniProt-GOA-ACAP-ARAP_08.05.2020_00h00 | 0,0102085  | 0,040806182 | 8,4728E-05 | 0,00032913 | [6, 7, 8, 9]            | Group100 | 9,35  | 10,00 |
| GO:0031571 | mitotic G1 DNA damage checkpoint                               | GO_BiologicalProcess-EBI-UniProt-GOA-ACAP-ARAP_08.05.2020_00h00 | 0,00103098 | 0,009002645 | 8,4728E-05 | 0,00032913 | [5, 6, 7, 8, 9, 10, 11] | Group100 | 13,85 | 9,00  |
| GO:0008134 | transcription factor binding                                   | GO_MolecularFunction-EBI-UniProt-GOA-ACAP-ARAP_08.05.2020_00h00 | 1,4931E-05 | 0,00023302  | 0,0002087  | 0,0007807  | [3]                     | Group070 | 7,31  | 53,00 |

|            |                                                                               |                                                                 |            |             |            |            |                                  |          |       |        |
|------------|-------------------------------------------------------------------------------|-----------------------------------------------------------------|------------|-------------|------------|------------|----------------------------------|----------|-------|--------|
| GO:0051427 | hormone receptor binding                                                      | GO_MolecularFunction-EBI-UniProt-GOA-ACAP-ARAP_08.05.2020_00h00 | 0,00578301 | 0,028661067 | 0,0002087  | 0,0007807  | [4]                              | Group070 | 8,08  | 16,00  |
| GO:0140297 | DNA-binding transcription factor binding                                      | GO_MolecularFunction-EBI-UniProt-GOA-ACAP-ARAP_08.05.2020_00h00 | 0,00583479 | 0,028820314 | 0,0002087  | 0,0007807  | [4]                              | Group070 | 6,79  | 26,00  |
| GO:0061629 | RNA polymerase II-specific DNA-binding transcription factor binding           | GO_MolecularFunction-EBI-UniProt-GOA-ACAP-ARAP_08.05.2020_00h00 | 0,00928244 | 0,038576037 | 0,0002087  | 0,0007807  | [5]                              | Group070 | 6,98  | 21,00  |
| GO:0003712 | transcription coregulator activity                                            | GO_BiologicalProcess-EBI-UniProt-GOA-ACAP-ARAP_08.05.2020_00h00 | 5,4984E-08 | 1,68046E-06 | 0,0002087  | 0,0007807  | [7, 8, 9, 10]                    | Group070 | 8,65  | 55,00  |
| GO:0006357 | regulation of transcription by RNA polymerase II                              | GO_BiologicalProcess-EBI-UniProt-GOA-ACAP-ARAP_08.05.2020_00h00 | 0,0060812  | 0,029345805 | 0,0002087  | 0,0007807  | [6, 7, 8, 9, 10, 11]             | Group070 | 4,98  | 114,00 |
| GO:0032535 | regulation of cellular component size                                         | GO_BiologicalProcess-EBI-UniProt-GOA-ACAP-ARAP_08.05.2020_00h00 | 0,00677551 | 0,031158835 | 0,00023345 | 0,00084207 | [4]                              | Group056 | 6,63  | 27,00  |
| GO:0033043 | regulation of organelle organization                                          | GO_BiologicalProcess-EBI-UniProt-GOA-ACAP-ARAP_08.05.2020_00h00 | 0,00119093 | 0,009706078 | 0,00023345 | 0,00084207 | [4, 5]                           | Group056 | 5,62  | 78,00  |
| GO:0010638 | positive regulation of organelle organization                                 | GO_BiologicalProcess-EBI-UniProt-GOA-ACAP-ARAP_08.05.2020_00h00 | 0,00249017 | 0,016381536 | 0,00023345 | 0,00084207 | [4, 5, 6]                        | Group056 | 6,23  | 43,00  |
| GO:0051493 | regulation of cytoskeleton organization                                       | GO_BiologicalProcess-EBI-UniProt-GOA-ACAP-ARAP_08.05.2020_00h00 | 0,01067142 | 0,041415282 | 0,00023345 | 0,00084207 | [5, 6]                           | Group056 | 5,99  | 35,00  |
| GO:0044843 | cell cycle G1/S phase transition                                              | GO_BiologicalProcess-EBI-UniProt-GOA-ACAP-ARAP_08.05.2020_00h00 | 0,01147434 | 0,043721698 | 0,00031389 | 0,00105677 | [4, 5]                           | Group081 | 6,94  | 20,00  |
| GO:0006260 | DNA replication                                                               | GO_BiologicalProcess-EBI-UniProt-GOA-ACAP-ARAP_08.05.2020_00h00 | 0,00100659 | 0,00889563  | 0,00031389 | 0,00105677 | [5, 6]                           | Group081 | 7,97  | 24,00  |
| GO:0006261 | DNA-dependent DNA replication                                                 | GO_BiologicalProcess-EBI-UniProt-GOA-ACAP-ARAP_08.05.2020_00h00 | 0,00036649 | 0,003924393 | 0,00031389 | 0,00105677 | [6, 7]                           | Group081 | 10,18 | 17,00  |
| GO:0006270 | DNA replication initiation                                                    | GO_BiologicalProcess-EBI-UniProt-GOA-ACAP-ARAP_08.05.2020_00h00 | 0,00754438 | 0,033136562 | 0,00031389 | 0,00105677 | [5, 6, 7, 8]                     | Group081 | 13,64 | 6,00   |
| GO:0033260 | nuclear DNA replication                                                       | GO_BiologicalProcess-EBI-UniProt-GOA-ACAP-ARAP_08.05.2020_00h00 | 0,01330857 | 0,047387552 | 0,00031389 | 0,00105677 | [4, 5, 8, 9]                     | Group081 | 10,94 | 7,00   |
| GO:0006271 | DNA strand elongation involved in DNA replication                             | GO_BiologicalProcess-EBI-UniProt-GOA-ACAP-ARAP_08.05.2020_00h00 | 0,00722575 | 0,032317616 | 0,00031389 | 0,00105677 | [6, 7, 8]                        | Group081 | 20,00 | 4,00   |
| GO:0000083 | regulation of transcription involved in G1/S transition of mitotic cell cycle | GO_BiologicalProcess-EBI-UniProt-GOA-ACAP-ARAP_08.05.2020_00h00 | 0,0133187  | 0,04730878  | 0,00031389 | 0,00105677 | [4, 5, 6, 7, 8, 9, 10, 11]       | Group081 | 13,89 | 5,00   |
| GO:0000727 | double-strand break repair via break-induced replication                      | GO_BiologicalProcess-EBI-UniProt-GOA-ACAP-ARAP_08.05.2020_00h00 | 0,00065447 | 0,006487218 | 0,00031389 | 0,00105677 | [8, 9, 10]                       | Group081 | 36,36 | 4,00   |
| GO:0050772 | positive regulation of axonogenesis                                           | GO_BiologicalProcess-EBI-UniProt-GOA-ACAP-ARAP_08.05.2020_00h00 | 0,0013666  | 0,010551599 | 0,00030644 | 0,00106727 | [6, 7, 8, 9, 10, 11, 12, 13, 14] | Group103 | 11,58 | 11,00  |
| GO:0048518 | positive regulation of biological process                                     | GO_BiologicalProcess-EBI-UniProt-GOA-ACAP-ARAP_08.05.2020_00h00 | 0,00105434 | 0,00899257  | 0,00030644 | 0,00106727 | [1, 2, 3]                        | Group103 | 4,59  | 301,00 |
| GO:0023051 | regulation of signaling                                                       | GO_BiologicalProcess-EBI-UniProt-GOA-ACAP-ARAP_08.05.2020_00h00 | 0,00106459 | 0,008975607 | 0,00030644 | 0,00106727 | [2, 3]                           | Group103 | 4,87  | 187,00 |
| GO:0048583 | regulation of response to stimulus                                            | GO_BiologicalProcess-EBI-UniProt-GOA-ACAP-ARAP_08.05.2020_00h00 | 0,0140207  | 0,049089178 | 0,00030644 | 0,00106727 | [2, 3]                           | Group103 | 4,55  | 206,00 |
| GO:0050793 | regulation of developmental process                                           | GO_BiologicalProcess-EBI-UniProt-GOA-ACAP-ARAP_08.05.2020_00h00 | 5,3426E-07 | 1,16979E-05 | 0,00030644 | 0,00106727 | [2, 3]                           | Group103 | 5,74  | 161,00 |
| GO:0051239 | regulation of multicellular organismal process                                | GO_BiologicalProcess-EBI-UniProt-GOA-ACAP-ARAP_08.05.2020_00h00 | 1,3622E-05 | 0,00021487  | 0,00030644 | 0,00106727 | [2, 3]                           | Group103 | 5,31  | 181,00 |
| GO:0048522 | positive regulation of cellular process                                       | GO_BiologicalProcess-EBI-UniProt-GOA-ACAP-ARAP_08.05.2020_00h00 | 6,6865E-05 | 0,000899924 | 0,00030644 | 0,00106727 | [2, 3, 4]                        | Group103 | 4,80  | 286,00 |

|            |                                                         |                                                                 |            |             |            |            |              |          |      |        |
|------------|---------------------------------------------------------|-----------------------------------------------------------------|------------|-------------|------------|------------|--------------|----------|------|--------|
| GO:0048584 | positive regulation of response to stimulus             | GO_BiologicalProcess-EBI-UniProt-GOA-ACAP-ARAP_08.05.2020_00h00 | 0,00860397 | 0,036691941 | 0,00030644 | 0,00106727 | [2, 3, 4]    | Group103 | 4,86 | 126,00 |
| GO:0051093 | negative regulation of developmental process            | GO_BiologicalProcess-EBI-UniProt-GOA-ACAP-ARAP_08.05.2020_00h00 | 0,00806685 | 0,03511592  | 0,00030644 | 0,00106727 | [2, 3, 4]    | Group103 | 5,49 | 58,00  |
| GO:0051094 | positive regulation of developmental process            | GO_BiologicalProcess-EBI-UniProt-GOA-ACAP-ARAP_08.05.2020_00h00 | 0,00128977 | 0,010118128 | 0,00030644 | 0,00106727 | [2, 3, 4]    | Group103 | 5,55 | 82,00  |
| GO:0051240 | positive regulation of multicellular organismal process | GO_BiologicalProcess-EBI-UniProt-GOA-ACAP-ARAP_08.05.2020_00h00 | 0,00121394 | 0,009731382 | 0,00030644 | 0,00106727 | [2, 3, 4]    | Group103 | 5,34 | 102,00 |
| GO:0009790 | embryo development                                      | GO_BiologicalProcess-EBI-UniProt-GOA-ACAP-ARAP_08.05.2020_00h00 | 0,00450283 | 0,023507655 | 0,00030644 | 0,00106727 | [3, 4]       | Group103 | 5,56 | 63,00  |
| GO:0010646 | regulation of cell communication                        | GO_BiologicalProcess-EBI-UniProt-GOA-ACAP-ARAP_08.05.2020_00h00 | 0,00083746 | 0,007875319 | 0,00030644 | 0,00106727 | [3, 4]       | Group103 | 4,90 | 186,00 |
| GO:0022603 | regulation of anatomical structure morphogenesis        | GO_BiologicalProcess-EBI-UniProt-GOA-ACAP-ARAP_08.05.2020_00h00 | 0,00284967 | 0,017713821 | 0,00030644 | 0,00106727 | [3, 4]       | Group103 | 5,62 | 66,00  |
| GO:0030155 | regulation of cell adhesion                             | GO_BiologicalProcess-EBI-UniProt-GOA-ACAP-ARAP_08.05.2020_00h00 | 0,0002975  | 0,003281432 | 0,00030644 | 0,00106727 | [3, 4]       | Group103 | 6,62 | 50,00  |
| GO:0035295 | tube development                                        | GO_BiologicalProcess-EBI-UniProt-GOA-ACAP-ARAP_08.05.2020_00h00 | 0,00965585 | 0,039567392 | 0,00030644 | 0,00106727 | [3, 4]       | Group103 | 5,39 | 61,00  |
| GO:0045595 | regulation of cell differentiation                      | GO_BiologicalProcess-EBI-UniProt-GOA-ACAP-ARAP_08.05.2020_00h00 | 1,4649E-06 | 2,90403E-05 | 0,00030644 | 0,00106727 | [3, 4]       | Group103 | 6,06 | 120,00 |
| GO:0048729 | tissue morphogenesis                                    | GO_BiologicalProcess-EBI-UniProt-GOA-ACAP-ARAP_08.05.2020_00h00 | 0,01362663 | 0,048285682 | 0,00030644 | 0,00106727 | [3, 4]       | Group103 | 5,69 | 41,00  |
| GO:0060560 | developmental growth involved in morphogenesis          | GO_BiologicalProcess-EBI-UniProt-GOA-ACAP-ARAP_08.05.2020_00h00 | 0,00172929 | 0,012748064 | 0,00030644 | 0,00106727 | [3, 4]       | Group103 | 8,08 | 21,00  |
| GO:2000026 | regulation of multicellular organismal development      | GO_BiologicalProcess-EBI-UniProt-GOA-ACAP-ARAP_08.05.2020_00h00 | 1,1047E-06 | 2,25077E-05 | 0,00030644 | 0,00106727 | [3, 4]       | Group103 | 5,95 | 132,00 |
| GO:0002520 | immune system development                               | GO_BiologicalProcess-EBI-UniProt-GOA-ACAP-ARAP_08.05.2020_00h00 | 2,2993E-06 | 4,32451E-05 | 0,00030644 | 0,00106727 | [2, 4, 5]    | Group103 | 6,92 | 74,00  |
| GO:0035239 | tube morphogenesis                                      | GO_BiologicalProcess-EBI-UniProt-GOA-ACAP-ARAP_08.05.2020_00h00 | 0,00081955 | 0,007756677 | 0,00030644 | 0,00106727 | [3, 4, 5]    | Group103 | 6,15 | 56,00  |
| GO:0045596 | negative regulation of cell differentiation             | GO_BiologicalProcess-EBI-UniProt-GOA-ACAP-ARAP_08.05.2020_00h00 | 0,00273721 | 0,01738303  | 0,00030644 | 0,00106727 | [3, 4, 5]    | Group103 | 6,06 | 47,00  |
| GO:0045597 | positive regulation of cell differentiation             | GO_BiologicalProcess-EBI-UniProt-GOA-ACAP-ARAP_08.05.2020_00h00 | 0,00057936 | 0,005943533 | 0,00030644 | 0,00106727 | [3, 4, 5]    | Group103 | 6,03 | 64,00  |
| GO:0051130 | positive regulation of cellular component organization  | GO_BiologicalProcess-EBI-UniProt-GOA-ACAP-ARAP_08.05.2020_00h00 | 0,00397208 | 0,021988861 | 0,00030644 | 0,00106727 | [3, 4, 5]    | Group103 | 5,46 | 71,00  |
| GO:0001655 | urogenital system development                           | GO_BiologicalProcess-EBI-UniProt-GOA-ACAP-ARAP_08.05.2020_00h00 | 0,01173816 | 0,044267047 | 0,00030644 | 0,00106727 | [4, 5]       | Group103 | 6,56 | 24,00  |
| GO:0001667 | ameboid-type cell migration                             | GO_BiologicalProcess-EBI-UniProt-GOA-ACAP-ARAP_08.05.2020_00h00 | 0,00238158 | 0,016026519 | 0,00030644 | 0,00106727 | [4, 5]       | Group103 | 6,93 | 30,00  |
| GO:0009792 | embryo development ending in birth or egg hatching      | GO_BiologicalProcess-EBI-UniProt-GOA-ACAP-ARAP_08.05.2020_00h00 | 0,00035885 | 0,003870864 | 0,00030644 | 0,00106727 | [4, 5]       | Group103 | 6,65 | 48,00  |
| GO:0048534 | hematopoietic or lymphoid organ development             | GO_BiologicalProcess-EBI-UniProt-GOA-ACAP-ARAP_08.05.2020_00h00 | 8,8905E-07 | 1,89019E-05 | 0,00030644 | 0,00106727 | [3, 4, 5, 6] | Group103 | 7,16 | 72,00  |
| GO:0060541 | respiratory system development                          | GO_BiologicalProcess-EBI-UniProt-GOA-ACAP-ARAP_08.05.2020_00h00 | 0,00734388 | 0,032548264 | 0,00030644 | 0,00106727 | [4, 5]       | Group103 | 7,69 | 17,00  |

|            |                                                                       |                                                                 |            |             |            |            |                            |          |       |       |
|------------|-----------------------------------------------------------------------|-----------------------------------------------------------------|------------|-------------|------------|------------|----------------------------|----------|-------|-------|
| GO:0061138 | morphogenesis of a branching epithelium                               | GO_BiologicalProcess-EBI-UniProt-GOA-ACAP-ARAP_08.05.2020_00h00 | 0,00284655 | 0,017769769 | 0,00030644 | 0,00106727 | [3, 4, 5, 6]               | Group103 | 8,46  | 17,00 |
| GO:0072359 | circulatory system development                                        | GO_BiologicalProcess-EBI-UniProt-GOA-ACAP-ARAP_08.05.2020_00h00 | 0,00149302 | 0,01123211  | 0,00030644 | 0,00106727 | [4, 5]                     | Group103 | 5,75  | 67,00 |
| GO:0010631 | epithelial cell migration                                             | GO_BiologicalProcess-EBI-UniProt-GOA-ACAP-ARAP_08.05.2020_00h00 | 0,00058844 | 0,005994724 | 0,00030644 | 0,00106727 | [4, 5, 6]                  | Group103 | 8,14  | 25,00 |
| GO:0010632 | regulation of epithelial cell migration                               | GO_BiologicalProcess-EBI-UniProt-GOA-ACAP-ARAP_08.05.2020_00h00 | 0,00137465 | 0,010558186 | 0,00030644 | 0,00106727 | [3, 4, 5, 6, 7]            | Group103 | 8,40  | 20,00 |
| GO:0010720 | positive regulation of cell development                               | GO_BiologicalProcess-EBI-UniProt-GOA-ACAP-ARAP_08.05.2020_00h00 | 0,01184334 | 0,044209119 | 0,00030644 | 0,00106727 | [4, 5, 6]                  | Group103 | 5,91  | 36,00 |
| GO:0030334 | regulation of cell migration                                          | GO_BiologicalProcess-EBI-UniProt-GOA-ACAP-ARAP_08.05.2020_00h00 | 0,01196401 | 0,044209588 | 0,00030644 | 0,00106727 | [4, 5, 6]                  | Group103 | 5,50  | 51,00 |
| GO:0048732 | gland development                                                     | GO_BiologicalProcess-EBI-UniProt-GOA-ACAP-ARAP_08.05.2020_00h00 | 0,00223689 | 0,015262903 | 0,00030644 | 0,00106727 | [4, 5, 6]                  | Group103 | 6,69  | 34,00 |
| GO:0051145 | smooth muscle cell differentiation                                    | GO_BiologicalProcess-EBI-UniProt-GOA-ACAP-ARAP_08.05.2020_00h00 | 0,01034567 | 0,040908623 | 0,00030644 | 0,00106727 | [5]                        | Group103 | 11,48 | 7,00  |
| GO:0060562 | epithelial tube morphogenesis                                         | GO_BiologicalProcess-EBI-UniProt-GOA-ACAP-ARAP_08.05.2020_00h00 | 0,00102574 | 0,009010539 | 0,00030644 | 0,00106727 | [4, 5, 6]                  | Group103 | 7,61  | 27,00 |
| GO:0072358 | cardiovascular system development                                     | GO_BiologicalProcess-EBI-UniProt-GOA-ACAP-ARAP_08.05.2020_00h00 | 0,00195144 | 0,013964712 | 0,00030644 | 0,00106727 | [4, 5, 6]                  | Group103 | 6,14  | 48,00 |
| GO:0001822 | kidney development                                                    | GO_BiologicalProcess-EBI-UniProt-GOA-ACAP-ARAP_08.05.2020_00h00 | 0,01183102 | 0,044275783 | 0,00030644 | 0,00106727 | [4, 5, 6, 7]               | Group103 | 6,82  | 21,00 |
| GO:0030097 | hemopoiesis                                                           | GO_BiologicalProcess-EBI-UniProt-GOA-ACAP-ARAP_08.05.2020_00h00 | 1,4609E-06 | 2,9358E-05  | 0,00030644 | 0,00106727 | [4, 5, 6, 7]               | Group103 | 7,17  | 69,00 |
| GO:0048754 | branching morphogenesis of an epithelial tube                         | GO_BiologicalProcess-EBI-UniProt-GOA-ACAP-ARAP_08.05.2020_00h00 | 0,00247505 | 0,016355416 | 0,00030644 | 0,00106727 | [4, 5, 6, 7]               | Group103 | 9,09  | 15,00 |
| GO:1903706 | regulation of hemopoiesis                                             | GO_BiologicalProcess-EBI-UniProt-GOA-ACAP-ARAP_08.05.2020_00h00 | 6,525E-06  | 0,000110026 | 0,00030644 | 0,00106727 | [3, 4, 5, 6, 7, 8]         | Group103 | 8,27  | 42,00 |
| GO:0010594 | regulation of endothelial cell migration                              | GO_BiologicalProcess-EBI-UniProt-GOA-ACAP-ARAP_08.05.2020_00h00 | 0,00980666 | 0,039631858 | 0,00030644 | 0,00106727 | [4, 5, 6, 7, 8]            | Group103 | 8,05  | 14,00 |
| GO:0010770 | positive regulation of cell morphogenesis involved in differentiation | GO_BiologicalProcess-EBI-UniProt-GOA-ACAP-ARAP_08.05.2020_00h00 | 0,00329477 | 0,019333733 | 0,00030644 | 0,00106727 | [5, 6, 7]                  | Group103 | 8,82  | 15,00 |
| GO:0043542 | endothelial cell migration                                            | GO_BiologicalProcess-EBI-UniProt-GOA-ACAP-ARAP_08.05.2020_00h00 | 0,00432958 | 0,023180651 | 0,00030644 | 0,00106727 | [5, 6, 7]                  | Group103 | 7,93  | 18,00 |
| GO:1901342 | regulation of vasculature development                                 | GO_BiologicalProcess-EBI-UniProt-GOA-ACAP-ARAP_08.05.2020_00h00 | 0,01138038 | 0,043590143 | 0,00030644 | 0,00106727 | [4, 5, 6, 7, 8]            | Group103 | 6,58  | 24,00 |
| GO:0048514 | blood vessel morphogenesis                                            | GO_BiologicalProcess-EBI-UniProt-GOA-ACAP-ARAP_08.05.2020_00h00 | 0,00257482 | 0,016787833 | 0,00030644 | 0,00106727 | [4, 5, 6, 7, 8, 9]         | Group103 | 6,30  | 41,00 |
| GO:0050769 | positive regulation of neurogenesis                                   | GO_BiologicalProcess-EBI-UniProt-GOA-ACAP-ARAP_08.05.2020_00h00 | 0,0070058  | 0,03172072  | 0,00030644 | 0,00106727 | [4, 5, 6, 7, 8, 9]         | Group103 | 6,26  | 33,00 |
| GO:0060976 | coronary vasculature development                                      | GO_BiologicalProcess-EBI-UniProt-GOA-ACAP-ARAP_08.05.2020_00h00 | 0,00344449 | 0,020051828 | 0,00030644 | 0,00106727 | [4, 5, 6, 7, 8, 9]         | Group103 | 14,00 | 7,00  |
| GO:0072073 | kidney epithelium development                                         | GO_BiologicalProcess-EBI-UniProt-GOA-ACAP-ARAP_08.05.2020_00h00 | 0,01053228 | 0,041092683 | 0,00030644 | 0,00106727 | [5, 6, 7, 8]               | Group103 | 8,23  | 13,00 |
| GO:0001570 | vasculogenesis                                                        | GO_BiologicalProcess-EBI-UniProt-GOA-ACAP-ARAP_08.05.2020_00h00 | 0,00884597 | 0,037290338 | 0,00030644 | 0,00106727 | [4, 5, 6, 7, 8, 9, 10]     | Group103 | 10,11 | 9,00  |
| GO:0002040 | sprouting angiogenesis                                                | GO_BiologicalProcess-EBI-UniProt-GOA-ACAP-ARAP_08.05.2020_00h00 | 0,00390121 | 0,021843806 | 0,00030644 | 0,00106727 | [4, 5, 6, 7, 8, 9, 10, 11] | Group103 | 9,68  | 12,00 |

|            |                                                                                                              |                                                                 |            |             |            |            |                              |          |       |        |
|------------|--------------------------------------------------------------------------------------------------------------|-----------------------------------------------------------------|------------|-------------|------------|------------|------------------------------|----------|-------|--------|
| GO:0072080 | nephron tubule development                                                                                   | GO_BiologicalProcess-EBI-UniProt-GOA-ACAP-ARAP_08.05.2020_00h00 | 0,00224538 | 0,015179563 | 0,00030644 | 0,00106727 | [5, 6, 7, 8, 9, 10]          | Group103 | 10,89 | 11,00  |
| GO:0001657 | ureteric bud development                                                                                     | GO_BiologicalProcess-EBI-UniProt-GOA-ACAP-ARAP_08.05.2020_00h00 | 0,00437197 | 0,023237992 | 0,00030644 | 0,00106727 | [5, 6, 8, 9, 10, 11]         | Group103 | 10,00 | 11,00  |
| GO:1903670 | regulation of sprouting angiogenesis                                                                         | GO_BiologicalProcess-EBI-UniProt-GOA-ACAP-ARAP_08.05.2020_00h00 | 0,00972408 | 0,03962563  | 0,00030644 | 0,00106727 | [5, 6, 7, 8, 9, 10, 11, 12]  | Group103 | 10,67 | 8,00   |
| GO:0060675 | ureteric bud morphogenesis                                                                                   | GO_BiologicalProcess-EBI-UniProt-GOA-ACAP-ARAP_08.05.2020_00h00 | 0,00194483 | 0,013985601 | 0,00030644 | 0,00106727 | [6, 7, 8, 9, 10, 11, 12, 13] | Group103 | 12,68 | 9,00   |
| GO:0008104 | protein localization                                                                                         | GO_BiologicalProcess-EBI-UniProt-GOA-ACAP-ARAP_08.05.2020_00h00 | 0,004388   | 0,023238959 | 0,0003961  | 0,00129052 | [3]                          | Group082 | 4,86  | 149,00 |
| GO:0051649 | establishment of localization in cell                                                                        | GO_BiologicalProcess-EBI-UniProt-GOA-ACAP-ARAP_08.05.2020_00h00 | 0,00120636 | 0,009777542 | 0,0003961  | 0,00129052 | [3]                          | Group082 | 5,02  | 149,00 |
| GO:0045184 | establishment of protein localization                                                                        | GO_BiologicalProcess-EBI-UniProt-GOA-ACAP-ARAP_08.05.2020_00h00 | 0,00678293 | 0,03109551  | 0,0003961  | 0,00129052 | [3, 4]                       | Group082 | 4,96  | 116,00 |
| GO:0046907 | intracellular transport                                                                                      | GO_BiologicalProcess-EBI-UniProt-GOA-ACAP-ARAP_08.05.2020_00h00 | 0,00093649 | 0,008480422 | 0,0003961  | 0,00129052 | [3, 4]                       | Group082 | 5,37  | 103,00 |
| GO:0033365 | protein localization to organelle                                                                            | GO_BiologicalProcess-EBI-UniProt-GOA-ACAP-ARAP_08.05.2020_00h00 | 6,7926E-05 | 0,00089773  | 0,0003961  | 0,00129052 | [5]                          | Group082 | 6,44  | 67,00  |
| GO:0072594 | establishment of protein localization to organelle                                                           | GO_BiologicalProcess-EBI-UniProt-GOA-ACAP-ARAP_08.05.2020_00h00 | 0,00986942 | 0,039775934 | 0,0003961  | 0,00129052 | [4, 5, 6]                    | Group082 | 5,95  | 37,00  |
| GO:0015031 | protein transport                                                                                            | GO_BiologicalProcess-EBI-UniProt-GOA-ACAP-ARAP_08.05.2020_00h00 | 0,01433205 | 0,049940895 | 0,0003961  | 0,00129052 | [4, 5, 6, 7]                 | Group082 | 4,87  | 109,00 |
| GO:0034504 | protein localization to nucleus                                                                              | GO_BiologicalProcess-EBI-UniProt-GOA-ACAP-ARAP_08.05.2020_00h00 | 0,00091803 | 0,008470153 | 0,0003961  | 0,00129052 | [6]                          | Group082 | 8,03  | 24,00  |
| GO:0051128 | regulation of cellular component organization                                                                | GO_BiologicalProcess-EBI-UniProt-GOA-ACAP-ARAP_08.05.2020_00h00 | 0,00053505 | 0,005566799 | 0,00053505 | 0,00168875 | [3, 4]                       | Group074 | 5,21  | 133,00 |
| GO:0051130 | positive regulation of cellular component organization                                                       | GO_BiologicalProcess-EBI-UniProt-GOA-ACAP-ARAP_08.05.2020_00h00 | 0,00397208 | 0,021988861 | 0,00053505 | 0,00168875 | [3, 4, 5]                    | Group074 | 5,46  | 71,00  |
| GO:0033043 | regulation of organelle organization                                                                         | GO_BiologicalProcess-EBI-UniProt-GOA-ACAP-ARAP_08.05.2020_00h00 | 0,00119093 | 0,009706078 | 0,00053505 | 0,00168875 | [4, 5]                       | Group074 | 5,62  | 78,00  |
| GO:0010638 | positive regulation of organelle organization                                                                | GO_BiologicalProcess-EBI-UniProt-GOA-ACAP-ARAP_08.05.2020_00h00 | 0,00249017 | 0,016381536 | 0,00053505 | 0,00168875 | [4, 5, 6]                    | Group074 | 6,23  | 43,00  |
| GO:0033044 | regulation of chromosome organization                                                                        | GO_BiologicalProcess-EBI-UniProt-GOA-ACAP-ARAP_08.05.2020_00h00 | 0,0056442  | 0,028067946 | 0,00053505 | 0,00168875 | [5, 6]                       | Group074 | 6,81  | 26,00  |
| GO:0051493 | regulation of cytoskeleton organization                                                                      | GO_BiologicalProcess-EBI-UniProt-GOA-ACAP-ARAP_08.05.2020_00h00 | 0,01067142 | 0,041415282 | 0,00053505 | 0,00168875 | [5, 6]                       | Group074 | 5,99  | 35,00  |
| GO:0060534 | trachea cartilage development                                                                                | GO_BiologicalProcess-EBI-UniProt-GOA-ACAP-ARAP_08.05.2020_00h00 | 0,003019   | 0,018608693 | 0,00055479 | 0,00169801 | [5, 6, 7]                    | Group057 | 37,50 | 3,00   |
| GO:0060740 | prostate gland epithelium morphogenesis                                                                      | GO_BiologicalProcess-EBI-UniProt-GOA-ACAP-ARAP_08.05.2020_00h00 | 0,00526885 | 0,026561538 | 0,00055479 | 0,00169801 | [3, 4, 5, 6, 7, 8, 9]        | Group057 | 17,24 | 5,00   |
| GO:0070384 | Harderian gland development                                                                                  | GO_BiologicalProcess-EBI-UniProt-GOA-ACAP-ARAP_08.05.2020_00h00 | 0,00024314 | 0,002743778 | 0,00055479 | 0,00169801 | [5, 6, 7]                    | Group057 | 75,00 | 3,00   |
| GO:0060528 | secretory columnal luminal epithelial cell differentiation involved in prostate glandular acinus development | GO_BiologicalProcess-EBI-UniProt-GOA-ACAP-ARAP_08.05.2020_00h00 | 0,00024314 | 0,002743778 | 0,00055479 | 0,00169801 | [4, 5, 6, 7, 8, 9]           | Group057 | 75,00 | 3,00   |
| GO:1903828 | negative regulation of cellular protein localization                                                         | GO_BiologicalProcess-EBI-UniProt-GOA-ACAP-ARAP_08.05.2020_00h00 | 0,00940467 | 0,038754635 | 0,00059223 | 0,00170899 | [3, 4, 5, 6]                 | Group059 | 9,02  | 11,00  |



|            |                                                                                                              |                                                                 |            |             |            |            |                                  |          |       |        |
|------------|--------------------------------------------------------------------------------------------------------------|-----------------------------------------------------------------|------------|-------------|------------|------------|----------------------------------|----------|-------|--------|
| GO:0034504 | protein localization to nucleus                                                                              | GO_BiologicalProcess-EBI-UniProt-GOA-ACAP-ARAP_08.05.2020_00h00 | 0,00091803 | 0,008470153 | 0,00059223 | 0,00170899 | [6]                              | Group059 | 8,03  | 24,00  |
| GO:1900180 | regulation of protein localization to nucleus                                                                | GO_BiologicalProcess-EBI-UniProt-GOA-ACAP-ARAP_08.05.2020_00h00 | 0,00344332 | 0,020124931 | 0,00059223 | 0,00170899 | [5, 6, 7]                        | Group059 | 9,42  | 13,00  |
| GO:1900181 | negative regulation of protein localization to nucleus                                                       | GO_BiologicalProcess-EBI-UniProt-GOA-ACAP-ARAP_08.05.2020_00h00 | 0,0092426  | 0,038519599 | 0,00059223 | 0,00170899 | [4, 5, 6, 7, 8]                  | Group059 | 15,15 | 5,00   |
| GO:2000047 | regulation of cell-cell adhesion mediated by cadherin                                                        | GO_BiologicalProcess-EBI-UniProt-GOA-ACAP-ARAP_08.05.2020_00h00 | 0,00146997 | 0,011115676 | 0,00064021 | 0,00174761 | [5, 6]                           | Group044 | 22,73 | 5,00   |
| GO:0060740 | prostate gland epithelium morphogenesis                                                                      | GO_BiologicalProcess-EBI-UniProt-GOA-ACAP-ARAP_08.05.2020_00h00 | 0,00526885 | 0,026561538 | 0,00064021 | 0,00174761 | [3, 4, 5, 6, 7, 8, 9]            | Group044 | 17,24 | 5,00   |
| GO:0060528 | secretory columnal luminal epithelial cell differentiation involved in prostate glandular acinus development | GO_BiologicalProcess-EBI-UniProt-GOA-ACAP-ARAP_08.05.2020_00h00 | 0,00024314 | 0,002743778 | 0,00064021 | 0,00174761 | [4, 5, 6, 7, 8, 9]               | Group044 | 75,00 | 3,00   |
| GO:0045917 | positive regulation of complement activation                                                                 | GO_BiologicalProcess-EBI-UniProt-GOA-ACAP-ARAP_08.05.2020_00h00 | 0,00058983 | 0,005967495 | 0,00058983 | 0,00175215 | [4, 5, 6, 7, 8, 9]               | Group031 | 60,00 | 3,00   |
| GO:0060348 | bone development                                                                                             | GO_BiologicalProcess-EBI-UniProt-GOA-ACAP-ARAP_08.05.2020_00h00 | 0,00251774 | 0,01648893  | 0,000634   | 0,00177872 | [4, 5, 6]                        | Group048 | 8,15  | 19,00  |
| GO:0098751 | bone cell development                                                                                        | GO_BiologicalProcess-EBI-UniProt-GOA-ACAP-ARAP_08.05.2020_00h00 | 0,0133187  | 0,04730878  | 0,000634   | 0,00177872 | [4, 5, 6, 7]                     | Group048 | 13,89 | 5,00   |
| GO:0061515 | myeloid cell development                                                                                     | GO_BiologicalProcess-EBI-UniProt-GOA-ACAP-ARAP_08.05.2020_00h00 | 0,00372574 | 0,021267148 | 0,000634   | 0,00177872 | [4, 5, 6, 7, 8, 9]               | Group048 | 11,54 | 9,00   |
| GO:0016032 | viral process                                                                                                | GO_BiologicalProcess-EBI-UniProt-GOA-ACAP-ARAP_08.05.2020_00h00 | 0,0006823  | 0,006672869 | 0,0006823  | 0,00181347 | [3]                              | Group016 | 6,11  | 59,00  |
| GO:0050772 | positive regulation of axonogenesis                                                                          | GO_BiologicalProcess-EBI-UniProt-GOA-ACAP-ARAP_08.05.2020_00h00 | 0,0013666  | 0,010551599 | 0,00075655 | 0,00195927 | [6, 7, 8, 9, 10, 11, 12, 13, 14] | Group061 | 11,58 | 11,00  |
| GO:0032535 | regulation of cellular component size                                                                        | GO_BiologicalProcess-EBI-UniProt-GOA-ACAP-ARAP_08.05.2020_00h00 | 0,00677551 | 0,031158835 | 0,00075655 | 0,00195927 | [4]                              | Group061 | 6,63  | 27,00  |
| GO:0051493 | regulation of cytoskeleton organization                                                                      | GO_BiologicalProcess-EBI-UniProt-GOA-ACAP-ARAP_08.05.2020_00h00 | 0,01067142 | 0,041415282 | 0,00075655 | 0,00195927 | [5, 6]                           | Group061 | 5,99  | 35,00  |
| GO:0010770 | positive regulation of cell morphogenesis involved in differentiation                                        | GO_BiologicalProcess-EBI-UniProt-GOA-ACAP-ARAP_08.05.2020_00h00 | 0,00329477 | 0,019333733 | 0,00075655 | 0,00195927 | [5, 6, 7]                        | Group061 | 8,82  | 15,00  |
| GO:0019827 | stem cell population maintenance                                                                             | GO_BiologicalProcess-EBI-UniProt-GOA-ACAP-ARAP_08.05.2020_00h00 | 0,00086558 | 0,00808796  | 0,00086558 | 0,00213229 | [2, 3]                           | Group055 | 9,44  | 17,00  |
| GO:0035019 | somatic stem cell population maintenance                                                                     | GO_BiologicalProcess-EBI-UniProt-GOA-ACAP-ARAP_08.05.2020_00h00 | 0,00150131 | 0,011236882 | 0,00086558 | 0,00213229 | [3, 4]                           | Group055 | 12,20 | 10,00  |
| GO:2000036 | regulation of stem cell population maintenance                                                               | GO_BiologicalProcess-EBI-UniProt-GOA-ACAP-ARAP_08.05.2020_00h00 | 0,00272172 | 0,01735981  | 0,00086558 | 0,00213229 | [3, 4]                           | Group055 | 16,67 | 6,00   |
| GO:1904672 | regulation of somatic stem cell population maintenance                                                       | GO_BiologicalProcess-EBI-UniProt-GOA-ACAP-ARAP_08.05.2020_00h00 | 0,00609474 | 0,029314715 | 0,00086558 | 0,00213229 | [4, 5]                           | Group055 | 30,00 | 3,00   |
| GO:1901135 | carbohydrate derivative metabolic process                                                                    | GO_BiologicalProcess-EBI-UniProt-GOA-ACAP-ARAP_08.05.2020_00h00 | 0,01060116 | 0,041251745 | 0,00084797 | 0,00214114 | [3]                              | Group085 | 5,31  | 65,00  |
| GO:1901137 | carbohydrate derivative biosynthetic process                                                                 | GO_BiologicalProcess-EBI-UniProt-GOA-ACAP-ARAP_08.05.2020_00h00 | 0,01074612 | 0,04148569  | 0,00084797 | 0,00214114 | [4]                              | Group085 | 5,75  | 42,00  |
| GO:1901566 | organonitrogen compound biosynthetic process                                                                 | GO_BiologicalProcess-EBI-UniProt-GOA-ACAP-ARAP_08.05.2020_00h00 | 0,00087312 | 0,008106748 | 0,00084797 | 0,00214114 | [4]                              | Group085 | 5,38  | 103,00 |
| GO:0006753 | nucleoside phosphate metabolic process                                                                       | GO_BiologicalProcess-EBI-UniProt-GOA-ACAP-ARAP_08.05.2020_00h00 | 0,00843541 | 0,036077995 | 0,00084797 | 0,00214114 | [4, 5, 6]                        | Group085 | 6,05  | 36,00  |

|            |                                                             |                                                                 |            |             |            |            |                                   |          |       |        |
|------------|-------------------------------------------------------------|-----------------------------------------------------------------|------------|-------------|------------|------------|-----------------------------------|----------|-------|--------|
| GO:0072522 | purine-containing compound biosynthetic process             | GO_BiologicalProcess-EBI-UniProt-GOA-ACAP-ARAP_08.05.2020_00h00 | 0,00871317 | 0,036836375 | 0,00084797 | 0,00214114 | [5]                               | Group085 | 7,56  | 17,00  |
| GO:0009165 | nucleotide biosynthetic process                             | GO_BiologicalProcess-EBI-UniProt-GOA-ACAP-ARAP_08.05.2020_00h00 | 0,00030839 | 0,003376185 | 0,00084797 | 0,00214114 | [6, 7, 8]                         | Group085 | 8,36  | 26,00  |
| GO:0009199 | ribonucleoside triphosphate metabolic process               | GO_BiologicalProcess-EBI-UniProt-GOA-ACAP-ARAP_08.05.2020_00h00 | 0,01164843 | 0,044041872 | 0,00084797 | 0,00214114 | [6, 7, 8]                         | Group085 | 9,68  | 9,00   |
| GO:0009260 | ribonucleotide biosynthetic process                         | GO_BiologicalProcess-EBI-UniProt-GOA-ACAP-ARAP_08.05.2020_00h00 | 0,00268579 | 0,017205471 | 0,00084797 | 0,00214114 | [6, 7, 8, 9]                      | Group085 | 8,29  | 18,00  |
| GO:0042776 | mitochondrial ATP synthesis coupled proton transport        | GO_BiologicalProcess-EBI-UniProt-GOA-ACAP-ARAP_08.05.2020_00h00 | 0,01397906 | 0,049060475 | 0,00084797 | 0,00214114 | [4, 5, 6, 7, 9, 10, 11, 12, 13]   | Group085 | 16,67 | 4,00   |
| GO:0009152 | purine ribonucleotide biosynthetic process                  | GO_BiologicalProcess-EBI-UniProt-GOA-ACAP-ARAP_08.05.2020_00h00 | 0,00697539 | 0,031680774 | 0,00084797 | 0,00214114 | [7, 8, 9, 10]                     | Group085 | 7,92  | 16,00  |
| GO:0000491 | small nucleolar ribonucleoprotein complex assembly          | GO_BiologicalProcess-EBI-UniProt-GOA-ACAP-ARAP_08.05.2020_00h00 | 0,00095093 | 0,008506158 | 0,00095093 | 0,00218281 | [6, 7, 8]                         | Group010 | 33,33 | 4,00   |
| GO:0030291 | protein serine/threonine kinase inhibitor activity          | GO_BiologicalProcess-EBI-UniProt-GOA-ACAP-ARAP_08.05.2020_00h00 | 0,00021557 | 0,002490113 | 0,00093892 | 0,00220537 | [8, 9, 10, 11, 12]                | Group090 | 21,88 | 7,00   |
| GO:0060541 | respiratory system development                              | GO_BiologicalProcess-EBI-UniProt-GOA-ACAP-ARAP_08.05.2020_00h00 | 0,00734388 | 0,032548264 | 0,00093892 | 0,00220537 | [4, 5]                            | Group090 | 7,69  | 17,00  |
| GO:0030856 | regulation of epithelial cell differentiation               | GO_BiologicalProcess-EBI-UniProt-GOA-ACAP-ARAP_08.05.2020_00h00 | 0,00151781 | 0,011302683 | 0,00093892 | 0,00220537 | [4, 5, 6]                         | Group090 | 9,55  | 15,00  |
| GO:0060485 | mesenchyme development                                      | GO_BiologicalProcess-EBI-UniProt-GOA-ACAP-ARAP_08.05.2020_00h00 | 0,00693329 | 0,031685803 | 0,00093892 | 0,00220537 | [4, 5, 6]                         | Group090 | 7,17  | 21,00  |
| GO:0030857 | negative regulation of epithelial cell differentiation      | GO_BiologicalProcess-EBI-UniProt-GOA-ACAP-ARAP_08.05.2020_00h00 | 2,2595E-05 | 0,000338235 | 0,00093892 | 0,00220537 | [4, 5, 6, 7]                      | Group090 | 20,00 | 10,00  |
| GO:0001837 | epithelial to mesenchymal transition                        | GO_BiologicalProcess-EBI-UniProt-GOA-ACAP-ARAP_08.05.2020_00h00 | 7,1331E-05 | 0,000934306 | 0,00093892 | 0,00220537 | [5, 6, 7, 8]                      | Group090 | 11,64 | 17,00  |
| GO:0010717 | regulation of epithelial to mesenchymal transition          | GO_BiologicalProcess-EBI-UniProt-GOA-ACAP-ARAP_08.05.2020_00h00 | 0,0010473  | 0,008984704 | 0,00093892 | 0,00220537 | [4, 5, 6, 7, 8, 9]                | Group090 | 11,96 | 11,00  |
| GO:0010718 | positive regulation of epithelial to mesenchymal transition | GO_BiologicalProcess-EBI-UniProt-GOA-ACAP-ARAP_08.05.2020_00h00 | 0,01147846 | 0,043511376 | 0,00093892 | 0,00220537 | [3, 4, 5, 6, 7, 8, 9, 10]         | Group090 | 12,50 | 6,00   |
| GO:0010719 | negative regulation of epithelial to mesenchymal transition | GO_BiologicalProcess-EBI-UniProt-GOA-ACAP-ARAP_08.05.2020_00h00 | 0,01184689 | 0,044110134 | 0,00093892 | 0,00220537 | [3, 4, 5, 6, 7, 8, 9, 10]         | Group090 | 14,29 | 5,00   |
| GO:2000826 | regulation of heart morphogenesis                           | GO_BiologicalProcess-EBI-UniProt-GOA-ACAP-ARAP_08.05.2020_00h00 | 0,00754438 | 0,033136562 | 0,00093892 | 0,00220537 | [5, 6, 7, 8]                      | Group090 | 13,64 | 6,00   |
| GO:1902747 | negative regulation of lens fiber cell differentiation      | GO_BiologicalProcess-EBI-UniProt-GOA-ACAP-ARAP_08.05.2020_00h00 | 0,00114476 | 0,009434626 | 0,00093892 | 0,00220537 | [3, 4, 5, 6, 7, 8, 9, 10, 11, 12] | Group090 | 50,00 | 3,00   |
| GO:0004860 | protein kinase inhibitor activity                           | GO_BiologicalProcess-EBI-UniProt-GOA-ACAP-ARAP_08.05.2020_00h00 | 0,00026167 | 0,002908152 | 0,00093892 | 0,00220537 | [7, 8, 9, 10, 11]                 | Group090 | 15,15 | 10,00  |
| GO:0043412 | macromolecule modification                                  | GO_BiologicalProcess-EBI-UniProt-GOA-ACAP-ARAP_08.05.2020_00h00 | 0,00093585 | 0,008527306 | 0,00093585 | 0,0022505  | [4]                               | Group065 | 4,78  | 220,00 |
| GO:0006464 | cellular protein modification process                       | GO_BiologicalProcess-EBI-UniProt-GOA-ACAP-ARAP_08.05.2020_00h00 | 0,00113649 | 0,00941937  | 0,00093585 | 0,0022505  | [5, 6]                            | Group065 | 4,79  | 210,00 |
| GO:0018193 | peptidyl-amino acid modification                            | GO_BiologicalProcess-EBI-UniProt-GOA-ACAP-ARAP_08.05.2020_00h00 | 9,2461E-05 | 0,001169311 | 0,00093585 | 0,0022505  | [6, 7]                            | Group065 | 6,02  | 83,00  |
| GO:0016570 | histone modification                                        | GO_BiologicalProcess-EBI-UniProt-GOA-ACAP-ARAP_08.05.2020_00h00 | 0,00012397 | 0,00150305  | 0,00093585 | 0,0022505  | [6, 7, 8]                         | Group065 | 7,63  | 37,00  |

|            |                                                          |                                                                 |            |             |            |            |                                  |          |       |       |
|------------|----------------------------------------------------------|-----------------------------------------------------------------|------------|-------------|------------|------------|----------------------------------|----------|-------|-------|
| GO:0018205 | peptidyl-lysine modification                             | GO_BiologicalProcess-EBI-UniProt-GOA-ACAP-ARAP_08.05.2020_00h00 | 2,6372E-06 | 4,83594E-05 | 0,00093585 | 0,0022505  | [7, 8]                           | Group065 | 8,98  | 38,00 |
| GO:0051642 | centrosome localization                                  | GO_BiologicalProcess-EBI-UniProt-GOA-ACAP-ARAP_08.05.2020_00h00 | 0,00121765 | 0,009708149 | 0,00121765 | 0,00273296 | [3, 4]                           | Group003 | 19,35 | 6,00  |
| GO:0051348 | negative regulation of transferase activity              | GO_BiologicalProcess-EBI-UniProt-GOA-ACAP-ARAP_08.05.2020_00h00 | 0,00220605 | 0,015337819 | 0,00126559 | 0,00277879 | [5]                              | Group064 | 7,64  | 23,00 |
| GO:0033673 | negative regulation of kinase activity                   | GO_BiologicalProcess-EBI-UniProt-GOA-ACAP-ARAP_08.05.2020_00h00 | 0,00238547 | 0,0159794   | 0,00126559 | 0,00277879 | [6, 7, 8, 9]                     | Group064 | 7,87  | 21,00 |
| GO:0006469 | negative regulation of protein kinase activity           | GO_BiologicalProcess-EBI-UniProt-GOA-ACAP-ARAP_08.05.2020_00h00 | 0,0043703  | 0,023313547 | 0,00126559 | 0,00277879 | [7, 8, 9, 10]                    | Group064 | 7,76  | 19,00 |
| GO:0050730 | regulation of peptidyl-tyrosine phosphorylation          | GO_BiologicalProcess-EBI-UniProt-GOA-ACAP-ARAP_08.05.2020_00h00 | 0,00470406 | 0,024213506 | 0,00126559 | 0,00277879 | [7, 8, 9, 10]                    | Group064 | 7,42  | 21,00 |
| GO:0050732 | negative regulation of peptidyl-tyrosine phosphorylation | GO_BiologicalProcess-EBI-UniProt-GOA-ACAP-ARAP_08.05.2020_00h00 | 0,0059004  | 0,028949445 | 0,00126559 | 0,00277879 | [7, 8, 9, 10, 11]                | Group064 | 12,73 | 7,00  |
| GO:0050772 | positive regulation of axonogenesis                      | GO_BiologicalProcess-EBI-UniProt-GOA-ACAP-ARAP_08.05.2020_00h00 | 0,0013666  | 0,010551599 | 0,00155291 | 0,00333711 | [6, 7, 8, 9, 10, 11, 12, 13, 14] | Group045 | 11,58 | 11,00 |
| GO:0040008 | regulation of growth                                     | GO_BiologicalProcess-EBI-UniProt-GOA-ACAP-ARAP_08.05.2020_00h00 | 0,00210161 | 0,01482239  | 0,00155291 | 0,00333711 | [2, 3]                           | Group045 | 6,22  | 45,00 |
| GO:0001558 | regulation of cell growth                                | GO_BiologicalProcess-EBI-UniProt-GOA-ACAP-ARAP_08.05.2020_00h00 | 0,00221933 | 0,015357364 | 0,00155291 | 0,00333711 | [3, 4, 5]                        | Group045 | 6,89  | 31,00 |
| GO:0019827 | stem cell population maintenance                         | GO_BiologicalProcess-EBI-UniProt-GOA-ACAP-ARAP_08.05.2020_00h00 | 0,00086558 | 0,00808796  | 0,00184444 | 0,0038018  | [2, 3]                           | Group096 | 9,44  | 17,00 |
| GO:0035019 | somatic stem cell population maintenance                 | GO_BiologicalProcess-EBI-UniProt-GOA-ACAP-ARAP_08.05.2020_00h00 | 0,00150131 | 0,011236882 | 0,00184444 | 0,0038018  | [3, 4]                           | Group096 | 12,20 | 10,00 |
| GO:2000036 | regulation of stem cell population maintenance           | GO_BiologicalProcess-EBI-UniProt-GOA-ACAP-ARAP_08.05.2020_00h00 | 0,00272172 | 0,01735981  | 0,00184444 | 0,0038018  | [3, 4]                           | Group096 | 16,67 | 6,00  |
| GO:1904672 | regulation of somatic stem cell population maintenance   | GO_BiologicalProcess-EBI-UniProt-GOA-ACAP-ARAP_08.05.2020_00h00 | 0,00609474 | 0,029314715 | 0,00184444 | 0,0038018  | [4, 5]                           | Group096 | 30,00 | 3,00  |
| GO:2000736 | regulation of stem cell differentiation                  | GO_BiologicalProcess-EBI-UniProt-GOA-ACAP-ARAP_08.05.2020_00h00 | 0,01182202 | 0,044355243 | 0,00184444 | 0,0038018  | [4, 5]                           | Group096 | 8,73  | 11,00 |
| GO:0061009 | common bile duct development                             | GO_BiologicalProcess-EBI-UniProt-GOA-ACAP-ARAP_08.05.2020_00h00 | 3,4908E-05 | 0,000502063 | 0,00184444 | 0,0038018  | [4, 5, 6]                        | Group096 | 66,67 | 4,00  |
| GO:2000737 | negative regulation of stem cell differentiation         | GO_BiologicalProcess-EBI-UniProt-GOA-ACAP-ARAP_08.05.2020_00h00 | 0,00222151 | 0,015300271 | 0,00184444 | 0,0038018  | [4, 5, 6]                        | Group096 | 20,83 | 5,00  |
| GO:0003279 | cardiac septum development                               | GO_BiologicalProcess-EBI-UniProt-GOA-ACAP-ARAP_08.05.2020_00h00 | 0,00886469 | 0,03726219  | 0,00184444 | 0,0038018  | [3, 4, 6, 7, 8]                  | Group096 | 9,09  | 11,00 |
| GO:0061005 | cell differentiation involved in kidney development      | GO_BiologicalProcess-EBI-UniProt-GOA-ACAP-ARAP_08.05.2020_00h00 | 0,01226081 | 0,04496653  | 0,00184444 | 0,0038018  | [4, 5, 6, 7, 8]                  | Group096 | 11,11 | 7,00  |
| GO:0072049 | comma-shaped body morphogenesis                          | GO_BiologicalProcess-EBI-UniProt-GOA-ACAP-ARAP_08.05.2020_00h00 | 0,00194417 | 0,014049736 | 0,00184444 | 0,0038018  | [3, 4, 5, 6, 7, 8, 9, 10]        | Group096 | 42,86 | 3,00  |
| GO:0072050 | S-shaped body morphogenesis                              | GO_BiologicalProcess-EBI-UniProt-GOA-ACAP-ARAP_08.05.2020_00h00 | 0,00609474 | 0,029314715 | 0,00184444 | 0,0038018  | [3, 4, 5, 6, 7, 8, 9, 10]        | Group096 | 30,00 | 3,00  |
| GO:0072073 | kidney epithelium development                            | GO_BiologicalProcess-EBI-UniProt-GOA-ACAP-ARAP_08.05.2020_00h00 | 0,01053228 | 0,041092683 | 0,00184444 | 0,0038018  | [5, 6, 7, 8]                     | Group096 | 8,23  | 13,00 |
| GO:0072080 | nephron tubule development                               | GO_BiologicalProcess-EBI-UniProt-GOA-ACAP-ARAP_08.05.2020_00h00 | 0,00224538 | 0,015179563 | 0,00184444 | 0,0038018  | [5, 6, 7, 8, 9, 10]              | Group096 | 10,89 | 11,00 |
| GO:0001657 | ureteric bud development                                 | GO_BiologicalProcess-EBI-UniProt-GOA-ACAP-ARAP_08.05.2020_00h00 | 0,00437197 | 0,023237992 | 0,00184444 | 0,0038018  | [5, 6, 8, 9, 10, 11]             | Group096 | 10,00 | 11,00 |

|            |                                                                 |                                                                 |            |             |            |            |                                   |          |       |        |
|------------|-----------------------------------------------------------------|-----------------------------------------------------------------|------------|-------------|------------|------------|-----------------------------------|----------|-------|--------|
| GO:0060675 | ureteric bud morphogenesis                                      | GO_BiologicalProcess-EBI-UniProt-GOA-ACAP-ARAP_08.05.2020_00h00 | 0,00194483 | 0,013985601 | 0,00184444 | 0,0038018  | [6, 7, 8, 9, 10, 11, 12, 13]      | Group096 | 12,68 | 9,00   |
| GO:0030291 | protein serine/threonine kinase inhibitor activity              | GO_BiologicalProcess-EBI-UniProt-GOA-ACAP-ARAP_08.05.2020_00h00 | 0,00021557 | 0,002490113 | 0,00181235 | 0,00381349 | [8, 9, 10, 11, 12]                | Group099 | 21,88 | 7,00   |
| GO:0044092 | negative regulation of molecular function                       | GO_BiologicalProcess-EBI-UniProt-GOA-ACAP-ARAP_08.05.2020_00h00 | 0,00552191 | 0,027553212 | 0,00181235 | 0,00381349 | [3]                               | Group099 | 5,43  | 68,00  |
| GO:0051348 | negative regulation of transferase activity                     | GO_BiologicalProcess-EBI-UniProt-GOA-ACAP-ARAP_08.05.2020_00h00 | 0,00220605 | 0,015337819 | 0,00181235 | 0,00381349 | [5]                               | Group099 | 7,64  | 23,00  |
| GO:0019220 | regulation of phosphate metabolic process                       | GO_BiologicalProcess-EBI-UniProt-GOA-ACAP-ARAP_08.05.2020_00h00 | 0,00670985 | 0,031051561 | 0,00181235 | 0,00381349 | [5, 6]                            | Group099 | 5,08  | 98,00  |
| GO:0031399 | regulation of protein modification process                      | GO_BiologicalProcess-EBI-UniProt-GOA-ACAP-ARAP_08.05.2020_00h00 | 0,00122922 | 0,009747351 | 0,00181235 | 0,00381349 | [5, 6, 7]                         | Group099 | 5,31  | 105,00 |
| GO:0045936 | negative regulation of phosphate metabolic process              | GO_BiologicalProcess-EBI-UniProt-GOA-ACAP-ARAP_08.05.2020_00h00 | 0,00908706 | 0,037979245 | 0,00181235 | 0,00381349 | [5, 6, 7]                         | Group099 | 6,02  | 36,00  |
| GO:0010719 | negative regulation of epithelial to mesenchymal transition     | GO_BiologicalProcess-EBI-UniProt-GOA-ACAP-ARAP_08.05.2020_00h00 | 0,01184689 | 0,044110134 | 0,00181235 | 0,00381349 | [3, 4, 5, 6, 7, 8, 9, 10]         | Group099 | 14,29 | 5,00   |
| GO:0031400 | negative regulation of protein modification process             | GO_BiologicalProcess-EBI-UniProt-GOA-ACAP-ARAP_08.05.2020_00h00 | 0,00745149 | 0,03282683  | 0,00181235 | 0,00381349 | [5, 6, 7, 8]                      | Group099 | 6,02  | 38,00  |
| GO:0042325 | regulation of phosphorylation                                   | GO_BiologicalProcess-EBI-UniProt-GOA-ACAP-ARAP_08.05.2020_00h00 | 0,0058829  | 0,028960451 | 0,00181235 | 0,00381349 | [6, 7]                            | Group099 | 5,17  | 89,00  |
| GO:0001932 | regulation of protein phosphorylation                           | GO_BiologicalProcess-EBI-UniProt-GOA-ACAP-ARAP_08.05.2020_00h00 | 0,01202917 | 0,044227567 | 0,00181235 | 0,00381349 | [6, 7, 8]                         | Group099 | 5,12  | 79,00  |
| GO:0033673 | negative regulation of kinase activity                          | GO_BiologicalProcess-EBI-UniProt-GOA-ACAP-ARAP_08.05.2020_00h00 | 0,00238547 | 0,0159794   | 0,00181235 | 0,00381349 | [6, 7, 8, 9]                      | Group099 | 7,87  | 21,00  |
| GO:1902747 | negative regulation of lens fiber cell differentiation          | GO_BiologicalProcess-EBI-UniProt-GOA-ACAP-ARAP_08.05.2020_00h00 | 0,00114476 | 0,009434626 | 0,00181235 | 0,00381349 | [3, 4, 5, 6, 7, 8, 9, 10, 11, 12] | Group099 | 50,00 | 3,00   |
| GO:0019887 | protein kinase regulator activity                               | GO_BiologicalProcess-EBI-UniProt-GOA-ACAP-ARAP_08.05.2020_00h00 | 0,00666023 | 0,031017654 | 0,00181235 | 0,00381349 | [6, 7, 8, 9, 10]                  | Group099 | 7,96  | 16,00  |
| GO:0006469 | negative regulation of protein kinase activity                  | GO_BiologicalProcess-EBI-UniProt-GOA-ACAP-ARAP_08.05.2020_00h00 | 0,0043703  | 0,023313547 | 0,00181235 | 0,00381349 | [7, 8, 9, 10]                     | Group099 | 7,76  | 19,00  |
| GO:0004860 | protein kinase inhibitor activity                               | GO_BiologicalProcess-EBI-UniProt-GOA-ACAP-ARAP_08.05.2020_00h00 | 0,00026167 | 0,002908152 | 0,00181235 | 0,00381349 | [7, 8, 9, 10, 11]                 | Group099 | 15,15 | 10,00  |
| GO:0050732 | negative regulation of peptidyl-tyrosine phosphorylation        | GO_BiologicalProcess-EBI-UniProt-GOA-ACAP-ARAP_08.05.2020_00h00 | 0,0059004  | 0,028949445 | 0,00181235 | 0,00381349 | [7, 8, 9, 10, 11]                 | Group099 | 12,73 | 7,00   |
| GO:0071901 | negative regulation of protein serine/threonine kinase activity | GO_BiologicalProcess-EBI-UniProt-GOA-ACAP-ARAP_08.05.2020_00h00 | 0,00466629 | 0,024188856 | 0,00181235 | 0,00381349 | [8, 9, 10, 11]                    | Group099 | 9,09  | 13,00  |
| GO:0031490 | chromatin DNA binding                                           | GO_MolecularFunction-EBI-UniProt-GOA-ACAP-ARAP_08.05.2020_00h00 | 0,00224538 | 0,015179563 | 0,00224538 | 0,00444672 | [3, 5]                            | Group021 | 10,89 | 11,00  |
| GO:0005975 | carbohydrate metabolic process                                  | GO_BiologicalProcess-EBI-UniProt-GOA-ACAP-ARAP_08.05.2020_00h00 | 0,00648131 | 0,03067125  | 0,0022231  | 0,00449067 | [3]                               | Group076 | 5,97  | 41,00  |
| GO:0042180 | cellular ketone metabolic process                               | GO_BiologicalProcess-EBI-UniProt-GOA-ACAP-ARAP_08.05.2020_00h00 | 0,01322385 | 0,047315594 | 0,0022231  | 0,00449067 | [3]                               | Group076 | 6,96  | 19,00  |
| GO:0044262 | cellular carbohydrate metabolic process                         | GO_BiologicalProcess-EBI-UniProt-GOA-ACAP-ARAP_08.05.2020_00h00 | 0,01292284 | 0,046465218 | 0,0022231  | 0,00449067 | [3, 4]                            | Group076 | 6,67  | 22,00  |
| GO:0062012 | regulation of small molecule metabolic process                  | GO_BiologicalProcess-EBI-UniProt-GOA-ACAP-ARAP_08.05.2020_00h00 | 0,00980614 | 0,039739247 | 0,0022231  | 0,00449067 | [3, 4]                            | Group076 | 6,26  | 30,00  |

|            |                                                                          |                                                                 |            |             |            |            |                        |          |       |       |
|------------|--------------------------------------------------------------------------|-----------------------------------------------------------------|------------|-------------|------------|------------|------------------------|----------|-------|-------|
| GO:0042181 | ketone biosynthetic process                                              | GO_BiologicalProcess-EBI-UniProt-GOA-ACAP-ARAP_08.05.2020_00h00 | 0,00240326 | 0,016025348 | 0,0022231  | 0,00449067 | [4]                    | Group076 | 14,89 | 7,00  |
| GO:0010565 | regulation of cellular ketone metabolic process                          | GO_BiologicalProcess-EBI-UniProt-GOA-ACAP-ARAP_08.05.2020_00h00 | 0,01186175 | 0,04405364  | 0,0022231  | 0,00449067 | [4, 5]                 | Group076 | 7,65  | 15,00 |
| GO:0010566 | regulation of ketone biosynthetic process                                | GO_BiologicalProcess-EBI-UniProt-GOA-ACAP-ARAP_08.05.2020_00h00 | 0,00390163 | 0,021763094 | 0,0022231  | 0,00449067 | [5, 6]                 | Group076 | 23,53 | 4,00  |
| GO:0071560 | cellular response to transforming growth factor beta stimulus            | GO_BiologicalProcess-EBI-UniProt-GOA-ACAP-ARAP_08.05.2020_00h00 | 0,00245953 | 0,016326362 | 0,00255268 | 0,00495808 | [4, 6]                 | Group047 | 8,00  | 20,00 |
| GO:0007178 | transmembrane receptor protein serine/threonine kinase signaling pathway | GO_BiologicalProcess-EBI-UniProt-GOA-ACAP-ARAP_08.05.2020_00h00 | 0,00741431 | 0,032761414 | 0,00255268 | 0,00495808 | [5, 6, 7]              | Group047 | 6,74  | 25,00 |
| GO:0007179 | transforming growth factor beta receptor signaling pathway               | GO_BiologicalProcess-EBI-UniProt-GOA-ACAP-ARAP_08.05.2020_00h00 | 0,00606435 | 0,029458281 | 0,00255268 | 0,00495808 | [5, 6, 7, 8]           | Group047 | 8,04  | 16,00 |
| GO:0043094 | cellular metabolic compound salvage                                      | GO_BiologicalProcess-EBI-UniProt-GOA-ACAP-ARAP_08.05.2020_00h00 | 0,00272172 | 0,01735981  | 0,00272172 | 0,00518666 | [3]                    | Group042 | 16,67 | 6,00  |
| GO:0043097 | pyrimidine nucleoside salvage                                            | GO_BiologicalProcess-EBI-UniProt-GOA-ACAP-ARAP_08.05.2020_00h00 | 0,01052948 | 0,041191343 | 0,00272172 | 0,00518666 | [5, 6, 7, 8, 9]        | Group042 | 25,00 | 3,00  |
| GO:0042127 | regulation of cell population proliferation                              | GO_BiologicalProcess-EBI-UniProt-GOA-ACAP-ARAP_08.05.2020_00h00 | 0,00279691 | 0,017609714 | 0,00279691 | 0,00523125 | [3, 4]                 | Group041 | 5,28  | 93,00 |
| GO:0008285 | negative regulation of cell population proliferation                     | GO_BiologicalProcess-EBI-UniProt-GOA-ACAP-ARAP_08.05.2020_00h00 | 0,00047703 | 0,005034603 | 0,00279691 | 0,00523125 | [3, 4, 5]              | Group041 | 6,52  | 49,00 |
| GO:0001221 | transcription cofactor binding                                           | GO_MolecularFunction-EBI-UniProt-GOA-ACAP-ARAP_08.05.2020_00h00 | 0,0030653  | 0,018505316 | 0,0030653  | 0,00543149 | [4]                    | Group038 | 14,29 | 7,00  |
| GO:0001222 | transcription corepressor binding                                        | GO_MolecularFunction-EBI-UniProt-GOA-ACAP-ARAP_08.05.2020_00h00 | 0,00133056 | 0,010382594 | 0,0030653  | 0,00543149 | [5]                    | Group038 | 30,77 | 4,00  |
| GO:0010632 | regulation of epithelial cell migration                                  | GO_BiologicalProcess-EBI-UniProt-GOA-ACAP-ARAP_08.05.2020_00h00 | 0,00137465 | 0,010558186 | 0,00319385 | 0,00546743 | [3, 4, 5, 6, 7]        | Group060 | 8,40  | 20,00 |
| GO:0010594 | regulation of endothelial cell migration                                 | GO_BiologicalProcess-EBI-UniProt-GOA-ACAP-ARAP_08.05.2020_00h00 | 0,00980666 | 0,039631858 | 0,00319385 | 0,00546743 | [4, 5, 6, 7, 8]        | Group060 | 8,05  | 14,00 |
| GO:0001570 | vasculogenesis                                                           | GO_BiologicalProcess-EBI-UniProt-GOA-ACAP-ARAP_08.05.2020_00h00 | 0,00884597 | 0,037290338 | 0,00319385 | 0,00546743 | [4, 5, 6, 7, 8, 9, 10] | Group060 | 10,11 | 9,00  |
| GO:0048845 | venous blood vessel morphogenesis                                        | GO_BiologicalProcess-EBI-UniProt-GOA-ACAP-ARAP_08.05.2020_00h00 | 0,00439531 | 0,02319398  | 0,00319385 | 0,00546743 | [5, 6, 7, 8, 9, 10]    | Group060 | 33,33 | 3,00  |
| GO:0019904 | protein domain specific binding                                          | GO_MolecularFunction-EBI-UniProt-GOA-ACAP-ARAP_08.05.2020_00h00 | 0,0030593  | 0,018545408 | 0,0030593  | 0,00551766 | [3]                    | Group020 | 6,06  | 46,00 |
| GO:0075713 | establishment of integrated proviral latency                             | GO_BiologicalProcess-EBI-UniProt-GOA-ACAP-ARAP_08.05.2020_00h00 | 0,003019   | 0,018608693 | 0,003019   | 0,00554398 | [5, 6]                 | Group006 | 37,50 | 3,00  |
| GO:0006114 | glycerol biosynthetic process                                            | GO_BiologicalProcess-EBI-UniProt-GOA-ACAP-ARAP_08.05.2020_00h00 | 0,003019   | 0,018608693 | 0,003019   | 0,00554398 | [6, 7, 8]              | Group007 | 37,50 | 3,00  |
| GO:0051188 | cofactor biosynthetic process                                            | GO_BiologicalProcess-EBI-UniProt-GOA-ACAP-ARAP_08.05.2020_00h00 | 0,00318782 | 0,019087896 | 0,00318782 | 0,00555121 | [4]                    | Group001 | 7,98  | 19,00 |
| GO:0042181 | ketone biosynthetic process                                              | GO_BiologicalProcess-EBI-UniProt-GOA-ACAP-ARAP_08.05.2020_00h00 | 0,00240326 | 0,016025348 | 0,00376698 | 0,00634108 | [4]                    | Group043 | 14,89 | 7,00  |
| GO:0010565 | regulation of cellular ketone metabolic process                          | GO_BiologicalProcess-EBI-UniProt-GOA-ACAP-ARAP_08.05.2020_00h00 | 0,01186175 | 0,04405364  | 0,00376698 | 0,00634108 | [4, 5]                 | Group043 | 7,65  | 15,00 |
| GO:0010566 | regulation of ketone biosynthetic process                                | GO_BiologicalProcess-EBI-UniProt-GOA-ACAP-ARAP_08.05.2020_00h00 | 0,00390163 | 0,021763094 | 0,00376698 | 0,00634108 | [5, 6]                 | Group043 | 23,53 | 4,00  |
| GO:0019211 | phosphatase activator activity                                           | GO_BiologicalProcess-EBI-UniProt-GOA-ACAP-ARAP_08.05.2020_00h00 | 0,00390163 | 0,021763094 | 0,00390163 | 0,00646008 | [6, 8]                 | Group019 | 23,53 | 4,00  |

|            |                                                                |                                                                 |            |             |            |            |                                   |          |       |        |
|------------|----------------------------------------------------------------|-----------------------------------------------------------------|------------|-------------|------------|------------|-----------------------------------|----------|-------|--------|
| GO:0042809 | vitamin D receptor binding                                     | GO_MolecularFunction-EBI-UniProt-GOA-ACAP-ARAP_08.05.2020_00h00 | 0,00390163 | 0,021763094 | 0,00390163 | 0,00646008 | [6, 7]                            | Group030 | 23,53 | 4,00   |
| GO:0050839 | cell adhesion molecule binding                                 | GO_MolecularFunction-EBI-UniProt-GOA-ACAP-ARAP_08.05.2020_00h00 | 0,00412503 | 0,022329962 | 0,00412503 | 0,00661314 | [3]                               | Group032 | 6,39  | 35,00  |
| GO:0045296 | cadherin binding                                               | GO_MolecularFunction-EBI-UniProt-GOA-ACAP-ARAP_08.05.2020_00h00 | 0,00384715 | 0,021623628 | 0,00412503 | 0,00661314 | [4]                               | Group032 | 7,10  | 25,00  |
| GO:0030522 | intracellular receptor signaling pathway                       | GO_BiologicalProcess-EBI-UniProt-GOA-ACAP-ARAP_08.05.2020_00h00 | 0,00076096 | 0,007296289 | 0,00411884 | 0,00670972 | [3, 4, 5]                         | Group073 | 8,14  | 24,00  |
| GO:0071310 | cellular response to organic substance                         | GO_BiologicalProcess-EBI-UniProt-GOA-ACAP-ARAP_08.05.2020_00h00 | 0,00732946 | 0,032582801 | 0,00411884 | 0,00670972 | [4]                               | Group073 | 4,83  | 140,00 |
| GO:0009755 | hormone-mediated signaling pathway                             | GO_BiologicalProcess-EBI-UniProt-GOA-ACAP-ARAP_08.05.2020_00h00 | 0,01050162 | 0,041192181 | 0,00411884 | 0,00670972 | [3, 4, 5, 6]                      | Group073 | 7,26  | 18,00  |
| GO:0032870 | cellular response to hormone stimulus                          | GO_BiologicalProcess-EBI-UniProt-GOA-ACAP-ARAP_08.05.2020_00h00 | 0,00399949 | 0,021974724 | 0,00411884 | 0,00670972 | [4, 5]                            | Group073 | 5,97  | 46,00  |
| GO:0071383 | cellular response to steroid hormone stimulus                  | GO_BiologicalProcess-EBI-UniProt-GOA-ACAP-ARAP_08.05.2020_00h00 | 0,00606695 | 0,029373631 | 0,00411884 | 0,00670972 | [5, 6]                            | Group073 | 7,38  | 20,00  |
| GO:0030518 | intracellular steroid hormone receptor signaling pathway       | GO_BiologicalProcess-EBI-UniProt-GOA-ACAP-ARAP_08.05.2020_00h00 | 0,00366435 | 0,021080799 | 0,00411884 | 0,00670972 | [4, 5, 6, 7, 8]                   | Group073 | 9,35  | 13,00  |
| GO:0042802 | identical protein binding                                      | GO_MolecularFunction-EBI-UniProt-GOA-ACAP-ARAP_08.05.2020_00h00 | 0,00426695 | 0,023013318 | 0,00426695 | 0,00673379 | [3]                               | Group027 | 5,14  | 100,00 |
| GO:0070898 | RNA polymerase III preinitiation complex assembly              | GO_BiologicalProcess-EBI-UniProt-GOA-ACAP-ARAP_08.05.2020_00h00 | 0,003019   | 0,018608693 | 0,00447734 | 0,00674942 | [8, 9, 10, 11, 12]                | Group046 | 37,50 | 3,00   |
| GO:0006383 | transcription by RNA polymerase III                            | GO_BiologicalProcess-EBI-UniProt-GOA-ACAP-ARAP_08.05.2020_00h00 | 0,00532789 | 0,026767179 | 0,00447734 | 0,00674942 | [6, 7, 8, 9, 10]                  | Group046 | 12,96 | 7,00   |
| GO:0070897 | transcription preinitiation complex assembly                   | GO_BiologicalProcess-EBI-UniProt-GOA-ACAP-ARAP_08.05.2020_00h00 | 0,01265239 | 0,045829773 | 0,00447734 | 0,00674942 | [7, 8, 9, 10, 11]                 | Group046 | 12,24 | 6,00   |
| GO:0060485 | mesenchyme development                                         | GO_BiologicalProcess-EBI-UniProt-GOA-ACAP-ARAP_08.05.2020_00h00 | 0,00693329 | 0,031685803 | 0,00445098 | 0,00681136 | [4, 5, 6]                         | Group077 | 7,17  | 21,00  |
| GO:2000048 | negative regulation of cell-cell adhesion mediated by cadherin | GO_BiologicalProcess-EBI-UniProt-GOA-ACAP-ARAP_08.05.2020_00h00 | 0,00609474 | 0,029314715 | 0,00445098 | 0,00681136 | [5, 6, 7]                         | Group077 | 30,00 | 3,00   |
| GO:0001837 | epithelial to mesenchymal transition                           | GO_BiologicalProcess-EBI-UniProt-GOA-ACAP-ARAP_08.05.2020_00h00 | 7,1331E-05 | 0,000934306 | 0,00445098 | 0,00681136 | [5, 6, 7, 8]                      | Group077 | 11,64 | 17,00  |
| GO:0010717 | regulation of epithelial to mesenchymal transition             | GO_BiologicalProcess-EBI-UniProt-GOA-ACAP-ARAP_08.05.2020_00h00 | 0,0010473  | 0,008984704 | 0,00445098 | 0,00681136 | [4, 5, 6, 7, 8, 9]                | Group077 | 11,96 | 11,00  |
| GO:0010718 | positive regulation of epithelial to mesenchymal transition    | GO_BiologicalProcess-EBI-UniProt-GOA-ACAP-ARAP_08.05.2020_00h00 | 0,01147846 | 0,043511376 | 0,00445098 | 0,00681136 | [3, 4, 5, 6, 7, 8, 9, 10]         | Group077 | 12,50 | 6,00   |
| GO:0010719 | negative regulation of epithelial to mesenchymal transition    | GO_BiologicalProcess-EBI-UniProt-GOA-ACAP-ARAP_08.05.2020_00h00 | 0,01184689 | 0,044110134 | 0,00445098 | 0,00681136 | [3, 4, 5, 6, 7, 8, 9, 10]         | Group077 | 14,29 | 5,00   |
| GO:1902747 | negative regulation of lens fiber cell differentiation         | GO_BiologicalProcess-EBI-UniProt-GOA-ACAP-ARAP_08.05.2020_00h00 | 0,00114476 | 0,009434626 | 0,00445098 | 0,00681136 | [3, 4, 5, 6, 7, 8, 9, 10, 11, 12] | Group077 | 50,00 | 3,00   |
| GO:0051020 | GTPase binding                                                 | GO_MolecularFunction-EBI-UniProt-GOA-ACAP-ARAP_08.05.2020_00h00 | 0,01147669 | 0,043617357 | 0,00444462 | 0,00690626 | [4]                               | Group050 | 5,96  | 35,00  |
| GO:0007264 | small GTPase mediated signal transduction                      | GO_BiologicalProcess-EBI-UniProt-GOA-ACAP-ARAP_08.05.2020_00h00 | 0,00349706 | 0,020277437 | 0,00444462 | 0,00690626 | [4, 5, 6]                         | Group050 | 6,31  | 38,00  |
| GO:0051056 | regulation of small GTPase mediated signal transduction        | GO_BiologicalProcess-EBI-UniProt-GOA-ACAP-ARAP_08.05.2020_00h00 | 0,00675635 | 0,031168437 | 0,00444462 | 0,00690626 | [5, 6, 7]                         | Group050 | 6,88  | 24,00  |

|            |                                                                                            |                                                                 |            |             |            |            |                             |          |       |       |
|------------|--------------------------------------------------------------------------------------------|-----------------------------------------------------------------|------------|-------------|------------|------------|-----------------------------|----------|-------|-------|
| GO:2001267 | regulation of cysteine-type endopeptidase activity involved in apoptotic signaling pathway | GO_BiologicalProcess-EBI-UniProt-GOA-ACAP-ARAP_08.05.2020_00h00 | 0,00486045 | 0,024931068 | 0,00486045 | 0,00701294 | [5, 6, 7, 8, 9, 10, 11, 12] | Group009 | 22,22 | 4,00  |
| GO:1903320 | regulation of protein modification by small protein conjugation or removal                 | GO_BiologicalProcess-EBI-UniProt-GOA-ACAP-ARAP_08.05.2020_00h00 | 0,00497767 | 0,025354998 | 0,00472986 | 0,00702524 | [6, 7, 8]                   | Group035 | 7,66  | 19,00 |
| GO:0032446 | protein modification by small protein conjugation                                          | GO_BiologicalProcess-EBI-UniProt-GOA-ACAP-ARAP_08.05.2020_00h00 | 0,00658032 | 0,030743105 | 0,00472986 | 0,00702524 | [7, 8]                      | Group035 | 5,60  | 55,00 |
| GO:0048729 | tissue morphogenesis                                                                       | GO_BiologicalProcess-EBI-UniProt-GOA-ACAP-ARAP_08.05.2020_00h00 | 0,01362663 | 0,048285682 | 0,00485452 | 0,0071059  | [3, 4]                      | Group097 | 5,69  | 41,00 |
| GO:0001655 | urogenital system development                                                              | GO_BiologicalProcess-EBI-UniProt-GOA-ACAP-ARAP_08.05.2020_00h00 | 0,01173816 | 0,044267047 | 0,00485452 | 0,0071059  | [4, 5]                      | Group097 | 6,56  | 24,00 |
| GO:0060541 | respiratory system development                                                             | GO_BiologicalProcess-EBI-UniProt-GOA-ACAP-ARAP_08.05.2020_00h00 | 0,00734388 | 0,032548264 | 0,00485452 | 0,0071059  | [4, 5]                      | Group097 | 7,69  | 17,00 |
| GO:0061138 | morphogenesis of a branching epithelium                                                    | GO_BiologicalProcess-EBI-UniProt-GOA-ACAP-ARAP_08.05.2020_00h00 | 0,00284655 | 0,017769769 | 0,00485452 | 0,0071059  | [3, 4, 5, 6]                | Group097 | 8,46  | 17,00 |
| GO:0051145 | smooth muscle cell differentiation                                                         | GO_BiologicalProcess-EBI-UniProt-GOA-ACAP-ARAP_08.05.2020_00h00 | 0,01034567 | 0,040908623 | 0,00485452 | 0,0071059  | [5]                         | Group097 | 11,48 | 7,00  |
| GO:0060485 | mesenchyme development                                                                     | GO_BiologicalProcess-EBI-UniProt-GOA-ACAP-ARAP_08.05.2020_00h00 | 0,00693329 | 0,031685803 | 0,00485452 | 0,0071059  | [4, 5, 6]                   | Group097 | 7,17  | 21,00 |
| GO:0060562 | epithelial tube morphogenesis                                                              | GO_BiologicalProcess-EBI-UniProt-GOA-ACAP-ARAP_08.05.2020_00h00 | 0,00102574 | 0,009010539 | 0,00485452 | 0,0071059  | [4, 5, 6]                   | Group097 | 7,61  | 27,00 |
| GO:0030857 | negative regulation of epithelial cell differentiation                                     | GO_BiologicalProcess-EBI-UniProt-GOA-ACAP-ARAP_08.05.2020_00h00 | 2,2595E-05 | 0,000338235 | 0,00485452 | 0,0071059  | [4, 5, 6, 7]                | Group097 | 20,00 | 10,00 |
| GO:0048754 | branching morphogenesis of an epithelial tube                                              | GO_BiologicalProcess-EBI-UniProt-GOA-ACAP-ARAP_08.05.2020_00h00 | 0,00247505 | 0,016355416 | 0,00485452 | 0,0071059  | [4, 5, 6, 7]                | Group097 | 9,09  | 15,00 |
| GO:0061323 | cell proliferation involved in heart morphogenesis                                         | GO_BiologicalProcess-EBI-UniProt-GOA-ACAP-ARAP_08.05.2020_00h00 | 0,00092442 | 0,008475746 | 0,00485452 | 0,0071059  | [3, 5, 6, 7, 8]             | Group097 | 25,00 | 5,00  |
| GO:0035886 | vascular smooth muscle cell differentiation                                                | GO_BiologicalProcess-EBI-UniProt-GOA-ACAP-ARAP_08.05.2020_00h00 | 0,00450535 | 0,023437398 | 0,00485452 | 0,0071059  | [5, 6, 7, 8]                | Group097 | 17,86 | 5,00  |
| GO:2000826 | regulation of heart morphogenesis                                                          | GO_BiologicalProcess-EBI-UniProt-GOA-ACAP-ARAP_08.05.2020_00h00 | 0,00754438 | 0,033136562 | 0,00485452 | 0,0071059  | [5, 6, 7, 8]                | Group097 | 13,64 | 6,00  |
| GO:0072080 | nephron tubule development                                                                 | GO_BiologicalProcess-EBI-UniProt-GOA-ACAP-ARAP_08.05.2020_00h00 | 0,00224538 | 0,015179563 | 0,00485452 | 0,0071059  | [5, 6, 7, 8, 9, 10]         | Group097 | 10,89 | 11,00 |
| GO:0035904 | aorta development                                                                          | GO_BiologicalProcess-EBI-UniProt-GOA-ACAP-ARAP_08.05.2020_00h00 | 0,00789435 | 0,03457018  | 0,00485452 | 0,0071059  | [5, 7, 8, 9, 10]            | Group097 | 12,07 | 7,00  |
| GO:0035909 | aorta morphogenesis                                                                        | GO_BiologicalProcess-EBI-UniProt-GOA-ACAP-ARAP_08.05.2020_00h00 | 0,00810163 | 0,03516297  | 0,00485452 | 0,0071059  | [6, 7, 8, 9, 10, 11]        | Group097 | 15,63 | 5,00  |
| GO:0051640 | organelle localization                                                                     | GO_BiologicalProcess-EBI-UniProt-GOA-ACAP-ARAP_08.05.2020_00h00 | 0,00632761 | 0,03013834  | 0,00511219 | 0,00727228 | [3]                         | Group079 | 5,98  | 41,00 |
| GO:0006903 | vesicle targeting                                                                          | GO_BiologicalProcess-EBI-UniProt-GOA-ACAP-ARAP_08.05.2020_00h00 | 0,00224538 | 0,015179563 | 0,00511219 | 0,00727228 | [2, 3, 5, 6]                | Group079 | 10,89 | 11,00 |
| GO:0006900 | vesicle budding from membrane                                                              | GO_BiologicalProcess-EBI-UniProt-GOA-ACAP-ARAP_08.05.2020_00h00 | 0,00224419 | 0,015241823 | 0,00511219 | 0,00727228 | [3, 5, 6]                   | Group079 | 10,34 | 12,00 |
| GO:0016050 | vesicle organization                                                                       | GO_BiologicalProcess-EBI-UniProt-GOA-ACAP-ARAP_08.05.2020_00h00 | 0,00398962 | 0,022002891 | 0,00511219 | 0,00727228 | [5]                         | Group079 | 7,08  | 25,00 |
| GO:0006901 | vesicle coating                                                                            | GO_BiologicalProcess-EBI-UniProt-GOA-ACAP-ARAP_08.05.2020_00h00 | 0,00074598 | 0,007199673 | 0,00511219 | 0,00727228 | [4, 6, 7]                   | Group079 | 13,33 | 10,00 |
| GO:0048194 | Golgi vesicle budding                                                                      | GO_BiologicalProcess-EBI-UniProt-GOA-ACAP-ARAP_08.05.2020_00h00 | 0,00197443 | 0,014060638 | 0,00511219 | 0,00727228 | [4, 6, 7]                   | Group079 | 11,76 | 10,00 |

|            |                                                    |                                                                 |            |             |            |            |                 |          |       |        |
|------------|----------------------------------------------------|-----------------------------------------------------------------|------------|-------------|------------|------------|-----------------|----------|-------|--------|
| GO:0048208 | COPII vesicle coating                              | GO_BiologicalProcess-EBI-UniProt-GOA-ACAP-ARAP_08.05.2020_00h00 | 0,00646385 | 0,030687595 | 0,00511219 | 0,00727228 | [5, 6, 7, 8, 9] | Group079 | 11,43 | 8,00   |
| GO:0009790 | embryo development                                 | GO_BiologicalProcess-EBI-UniProt-GOA-ACAP-ARAP_08.05.2020_00h00 | 0,00450283 | 0,023507655 | 0,00518904 | 0,00727906 | [3, 4]          | Group083 | 5,56  | 63,00  |
| GO:0035295 | tube development                                   | GO_BiologicalProcess-EBI-UniProt-GOA-ACAP-ARAP_08.05.2020_00h00 | 0,00965585 | 0,039567392 | 0,00518904 | 0,00727906 | [3, 4]          | Group083 | 5,39  | 61,00  |
| GO:0048729 | tissue morphogenesis                               | GO_BiologicalProcess-EBI-UniProt-GOA-ACAP-ARAP_08.05.2020_00h00 | 0,01362663 | 0,048285682 | 0,00518904 | 0,00727906 | [3, 4]          | Group083 | 5,69  | 41,00  |
| GO:0035239 | tube morphogenesis                                 | GO_BiologicalProcess-EBI-UniProt-GOA-ACAP-ARAP_08.05.2020_00h00 | 0,00081955 | 0,007756677 | 0,00518904 | 0,00727906 | [3, 4, 5]       | Group083 | 6,15  | 56,00  |
| GO:0009792 | embryo development ending in birth or egg hatching | GO_BiologicalProcess-EBI-UniProt-GOA-ACAP-ARAP_08.05.2020_00h00 | 0,00035885 | 0,003870864 | 0,00518904 | 0,00727906 | [4, 5]          | Group083 | 6,65  | 48,00  |
| GO:0072359 | circulatory system development                     | GO_BiologicalProcess-EBI-UniProt-GOA-ACAP-ARAP_08.05.2020_00h00 | 0,00149302 | 0,01123211  | 0,00518904 | 0,00727906 | [4, 5]          | Group083 | 5,75  | 67,00  |
| GO:0060562 | epithelial tube morphogenesis                      | GO_BiologicalProcess-EBI-UniProt-GOA-ACAP-ARAP_08.05.2020_00h00 | 0,00102574 | 0,009010539 | 0,00518904 | 0,00727906 | [4, 5, 6]       | Group083 | 7,61  | 27,00  |
| GO:0001701 | in utero embryonic development                     | GO_BiologicalProcess-EBI-UniProt-GOA-ACAP-ARAP_08.05.2020_00h00 | 0,00080389 | 0,007657848 | 0,00518904 | 0,00727906 | [6, 7]          | Group083 | 7,35  | 31,00  |
| GO:0012501 | programmed cell death                              | GO_BiologicalProcess-EBI-UniProt-GOA-ACAP-ARAP_08.05.2020_00h00 | 0,00669526 | 0,031082088 | 0,00528282 | 0,00730911 | [3]             | Group087 | 4,99  | 110,00 |
| GO:0023056 | positive regulation of signaling                   | GO_BiologicalProcess-EBI-UniProt-GOA-ACAP-ARAP_08.05.2020_00h00 | 0,00616386 | 0,029550245 | 0,00528282 | 0,00730911 | [2, 3, 4]       | Group087 | 5,05  | 103,00 |
| GO:0010941 | regulation of cell death                           | GO_BiologicalProcess-EBI-UniProt-GOA-ACAP-ARAP_08.05.2020_00h00 | 0,00652066 | 0,03065965  | 0,00528282 | 0,00730911 | [3, 4]          | Group087 | 5,13  | 92,00  |
| GO:0006915 | apoptotic process                                  | GO_BiologicalProcess-EBI-UniProt-GOA-ACAP-ARAP_08.05.2020_00h00 | 0,0021518  | 0,015103772 | 0,00528282 | 0,00730911 | [4]             | Group087 | 5,20  | 107,00 |
| GO:0010647 | positive regulation of cell communication          | GO_BiologicalProcess-EBI-UniProt-GOA-ACAP-ARAP_08.05.2020_00h00 | 0,00550487 | 0,027561951 | 0,00528282 | 0,00730911 | [3, 4, 5]       | Group087 | 5,07  | 103,00 |
| GO:0010942 | positive regulation of cell death                  | GO_BiologicalProcess-EBI-UniProt-GOA-ACAP-ARAP_08.05.2020_00h00 | 0,00325328 | 0,0192442   | 0,00528282 | 0,00730911 | [3, 4, 5]       | Group087 | 6,07  | 45,00  |
| GO:0009967 | positive regulation of signal transduction         | GO_BiologicalProcess-EBI-UniProt-GOA-ACAP-ARAP_08.05.2020_00h00 | 0,00303475 | 0,018472932 | 0,00528282 | 0,00730911 | [3, 4, 5, 6]    | Group087 | 5,26  | 93,00  |
| GO:0042981 | regulation of apoptotic process                    | GO_BiologicalProcess-EBI-UniProt-GOA-ACAP-ARAP_08.05.2020_00h00 | 0,00142297 | 0,010872362 | 0,00528282 | 0,00730911 | [5, 6]          | Group087 | 5,44  | 89,00  |
| GO:0043065 | positive regulation of apoptotic process           | GO_BiologicalProcess-EBI-UniProt-GOA-ACAP-ARAP_08.05.2020_00h00 | 0,00326111 | 0,019213051 | 0,00528282 | 0,00730911 | [5, 6, 7]       | Group087 | 6,18  | 42,00  |
| GO:2001235 | positive regulation of apoptotic signaling pathway | GO_BiologicalProcess-EBI-UniProt-GOA-ACAP-ARAP_08.05.2020_00h00 | 0,00104054 | 0,009032417 | 0,00528282 | 0,00730911 | [4, 5, 6, 7, 8] | Group087 | 9,29  | 17,00  |
| GO:0036498 | IRE1-mediated unfolded protein response            | GO_BiologicalProcess-EBI-UniProt-GOA-ACAP-ARAP_08.05.2020_00h00 | 0,00592616 | 0,028978905 | 0,00592616 | 0,0080884  | [4, 5, 6, 7, 8] | Group025 | 11,59 | 8,00   |
| GO:0035646 | endosome to melanosome transport                   | GO_BiologicalProcess-EBI-UniProt-GOA-ACAP-ARAP_08.05.2020_00h00 | 0,00609474 | 0,029314715 | 0,00609474 | 0,00820759 | [5, 6, 7]       | Group024 | 30,00 | 3,00   |
| GO:0001522 | pseudouridine synthesis                            | GO_BiologicalProcess-EBI-UniProt-GOA-ACAP-ARAP_08.05.2020_00h00 | 0,00722575 | 0,032317616 | 0,00722575 | 0,00947793 | [6, 7, 8]       | Group028 | 20,00 | 4,00   |
| GO:0005080 | protein kinase C binding                           | GO_MolecularFunction-EBI-UniProt-GOA-ACAP-ARAP_08.05.2020_00h00 | 0,00718159 | 0,032317147 | 0,00718159 | 0,00954395 | [6]             | Group005 | 12,28 | 7,00   |
| GO:0051145 | smooth muscle cell differentiation                 | GO_BiologicalProcess-EBI-UniProt-GOA-ACAP-ARAP_08.05.2020_00h00 | 0,01034567 | 0,040908623 | 0,00794445 | 0,01028705 | [5]             | Group069 | 11,48 | 7,00   |



|            |                                                              |                                                                 |            |             |            |            |                            |          |       |        |
|------------|--------------------------------------------------------------|-----------------------------------------------------------------|------------|-------------|------------|------------|----------------------------|----------|-------|--------|
| GO:0035886 | vascular smooth muscle cell differentiation                  | GO_BiologicalProcess-EBI-UniProt-GOA-ACAP-ARAP_08.05.2020_00h00 | 0,00450535 | 0,023437398 | 0,00794445 | 0,01028705 | [5, 6, 7, 8]               | Group069 | 17,86 | 5,00   |
| GO:0060976 | coronary vasculature development                             | GO_BiologicalProcess-EBI-UniProt-GOA-ACAP-ARAP_08.05.2020_00h00 | 0,00344449 | 0,020051828 | 0,00794445 | 0,01028705 | [4, 5, 6, 7, 8, 9]         | Group069 | 14,00 | 7,00   |
| GO:0002040 | sprouting angiogenesis                                       | GO_BiologicalProcess-EBI-UniProt-GOA-ACAP-ARAP_08.05.2020_00h00 | 0,00390121 | 0,021843806 | 0,00794445 | 0,01028705 | [4, 5, 6, 7, 8, 9, 10, 11] | Group069 | 9,68  | 12,00  |
| GO:0060947 | cardiac vascular smooth muscle cell differentiation          | GO_BiologicalProcess-EBI-UniProt-GOA-ACAP-ARAP_08.05.2020_00h00 | 0,003019   | 0,018608693 | 0,00794445 | 0,01028705 | [5, 6, 7, 8, 9, 10]        | Group069 | 37,50 | 3,00   |
| GO:0035904 | aorta development                                            | GO_BiologicalProcess-EBI-UniProt-GOA-ACAP-ARAP_08.05.2020_00h00 | 0,00789435 | 0,03457018  | 0,00794445 | 0,01028705 | [5, 7, 8, 9, 10]           | Group069 | 12,07 | 7,00   |
| GO:0034097 | response to cytokine                                         | GO_BiologicalProcess-EBI-UniProt-GOA-ACAP-ARAP_08.05.2020_00h00 | 0,01025411 | 0,04076634  | 0,00817803 | 0,01032476 | [4]                        | Group058 | 5,29  | 67,00  |
| GO:0071310 | cellular response to organic substance                       | GO_BiologicalProcess-EBI-UniProt-GOA-ACAP-ARAP_08.05.2020_00h00 | 0,00732946 | 0,032582801 | 0,00817803 | 0,01032476 | [4]                        | Group058 | 4,83  | 140,00 |
| GO:0032870 | cellular response to hormone stimulus                        | GO_BiologicalProcess-EBI-UniProt-GOA-ACAP-ARAP_08.05.2020_00h00 | 0,00399949 | 0,021974724 | 0,00817803 | 0,01032476 | [4, 5]                     | Group058 | 5,97  | 46,00  |
| GO:0071345 | cellular response to cytokine stimulus                       | GO_BiologicalProcess-EBI-UniProt-GOA-ACAP-ARAP_08.05.2020_00h00 | 0,00954548 | 0,039224699 | 0,00817803 | 0,01032476 | [5]                        | Group058 | 5,36  | 63,00  |
| GO:0051098 | regulation of binding                                        | GO_BiologicalProcess-EBI-UniProt-GOA-ACAP-ARAP_08.05.2020_00h00 | 0,00830744 | 0,03584414  | 0,00830744 | 0,01035865 | [3]                        | Group033 | 6,60  | 26,00  |
| GO:0051101 | regulation of DNA binding                                    | GO_BiologicalProcess-EBI-UniProt-GOA-ACAP-ARAP_08.05.2020_00h00 | 0,00722218 | 0,032400433 | 0,00830744 | 0,01035865 | [4]                        | Group033 | 8,96  | 12,00  |
| GO:0007028 | cytoplasm organization                                       | GO_BiologicalProcess-EBI-UniProt-GOA-ACAP-ARAP_08.05.2020_00h00 | 0,00813485 | 0,035203002 | 0,00813485 | 0,01040024 | [4]                        | Group012 | 27,27 | 3,00   |
| GO:0070932 | histone H3 deacetylation                                     | GO_BiologicalProcess-EBI-UniProt-GOA-ACAP-ARAP_08.05.2020_00h00 | 0,00864971 | 0,036780071 | 0,00864971 | 0,01052555 | [8, 9, 10]                 | Group004 | 19,05 | 4,00   |
| GO:0010942 | positive regulation of cell death                            | GO_BiologicalProcess-EBI-UniProt-GOA-ACAP-ARAP_08.05.2020_00h00 | 0,00325328 | 0,0192442   | 0,00856299 | 0,0105471  | [3, 4, 5]                  | Group068 | 6,07  | 45,00  |
| GO:0097192 | extrinsic apoptotic signaling pathway in absence of ligand   | GO_BiologicalProcess-EBI-UniProt-GOA-ACAP-ARAP_08.05.2020_00h00 | 0,01050082 | 0,04129947  | 0,00856299 | 0,0105471  | [4, 5, 6, 7]               | Group068 | 10,53 | 8,00   |
| GO:0043065 | positive regulation of apoptotic process                     | GO_BiologicalProcess-EBI-UniProt-GOA-ACAP-ARAP_08.05.2020_00h00 | 0,00326111 | 0,019213051 | 0,00856299 | 0,0105471  | [5, 6, 7]                  | Group068 | 6,18  | 42,00  |
| GO:2001235 | positive regulation of apoptotic signaling pathway           | GO_BiologicalProcess-EBI-UniProt-GOA-ACAP-ARAP_08.05.2020_00h00 | 0,00104054 | 0,009032417 | 0,00856299 | 0,0105471  | [4, 5, 6, 7, 8]            | Group068 | 9,29  | 17,00  |
| GO:2001236 | regulation of extrinsic apoptotic signaling pathway          | GO_BiologicalProcess-EBI-UniProt-GOA-ACAP-ARAP_08.05.2020_00h00 | 0,01237392 | 0,045155589 | 0,00856299 | 0,0105471  | [5, 6, 7, 8]               | Group068 | 7,82  | 14,00  |
| GO:2001238 | positive regulation of extrinsic apoptotic signaling pathway | GO_BiologicalProcess-EBI-UniProt-GOA-ACAP-ARAP_08.05.2020_00h00 | 0,0059004  | 0,028949445 | 0,00856299 | 0,0105471  | [5, 6, 7, 8, 9]            | Group068 | 12,73 | 7,00   |
| GO:0006364 | rRNA processing                                              | GO_BiologicalProcess-EBI-UniProt-GOA-ACAP-ARAP_08.05.2020_00h00 | 0,00908557 | 0,038081523 | 0,00908557 | 0,01092432 | [6, 7, 8, 9]               | Group011 | 7,52  | 17,00  |
| GO:0006665 | sphingolipid metabolic process                               | GO_BiologicalProcess-EBI-UniProt-GOA-ACAP-ARAP_08.05.2020_00h00 | 0,00934755 | 0,03873688  | 0,00934755 | 0,01110709 | [4, 5, 6]                  | Group036 | 8,09  | 14,00  |
| GO:0001573 | ganglioside metabolic process                                | GO_BiologicalProcess-EBI-UniProt-GOA-ACAP-ARAP_08.05.2020_00h00 | 0,01024521 | 0,040841632 | 0,00934755 | 0,01110709 | [6, 7, 8]                  | Group036 | 18,18 | 4,00   |
| GO:0044248 | cellular catabolic process                                   | GO_BiologicalProcess-EBI-UniProt-GOA-ACAP-ARAP_08.05.2020_00h00 | 0,00978321 | 0,039756157 | 0,00962754 | 0,01130676 | [3]                        | Group088 | 4,88  | 119,00 |

|            |                                                                |                                                                 |            |             |            |            |                                     |          |       |        |
|------------|----------------------------------------------------------------|-----------------------------------------------------------------|------------|-------------|------------|------------|-------------------------------------|----------|-------|--------|
| GO:1901575 | organic substance catabolic process                            | GO_BiologicalProcess-EBI-UniProt-GOA-ACAP-ARAP_08.05.2020_00h00 | 0,00469808 | 0,024267906 | 0,00962754 | 0,01130676 | [3]                                 | Group088 | 5,00  | 118,00 |
| GO:0009057 | macromolecule catabolic process                                | GO_BiologicalProcess-EBI-UniProt-GOA-ACAP-ARAP_08.05.2020_00h00 | 0,00264444 | 0,017014867 | 0,00962754 | 0,01130676 | [4]                                 | Group088 | 5,42  | 81,00  |
| GO:0019439 | aromatic compound catabolic process                            | GO_BiologicalProcess-EBI-UniProt-GOA-ACAP-ARAP_08.05.2020_00h00 | 0,00429309 | 0,023069486 | 0,00962754 | 0,01130676 | [4]                                 | Group088 | 6,15  | 40,00  |
| GO:0044270 | cellular nitrogen compound catabolic process                   | GO_BiologicalProcess-EBI-UniProt-GOA-ACAP-ARAP_08.05.2020_00h00 | 0,00492534 | 0,025175845 | 0,00962754 | 0,01130676 | [4]                                 | Group088 | 6,14  | 39,00  |
| GO:0046700 | heterocycle catabolic process                                  | GO_BiologicalProcess-EBI-UniProt-GOA-ACAP-ARAP_08.05.2020_00h00 | 0,00443854 | 0,023254775 | 0,00962754 | 0,01130676 | [4]                                 | Group088 | 6,18  | 39,00  |
| GO:1901361 | organic cyclic compound catabolic process                      | GO_BiologicalProcess-EBI-UniProt-GOA-ACAP-ARAP_08.05.2020_00h00 | 0,006177   | 0,029516801 | 0,00962754 | 0,01130676 | [4]                                 | Group088 | 5,99  | 41,00  |
| GO:0034655 | nucleobase-containing compound catabolic process               | GO_BiologicalProcess-EBI-UniProt-GOA-ACAP-ARAP_08.05.2020_00h00 | 0,00303302 | 0,01853935  | 0,00962754 | 0,01130676 | [4, 5]                              | Group088 | 6,41  | 37,00  |
| GO:0044265 | cellular macromolecule catabolic process                       | GO_BiologicalProcess-EBI-UniProt-GOA-ACAP-ARAP_08.05.2020_00h00 | 0,00126989 | 0,010015749 | 0,00962754 | 0,01130676 | [4, 5]                              | Group088 | 5,72  | 71,00  |
| GO:0006401 | RNA catabolic process                                          | GO_BiologicalProcess-EBI-UniProt-GOA-ACAP-ARAP_08.05.2020_00h00 | 0,01374993 | 0,048605185 | 0,00962754 | 0,01130676 | [5, 6, 7]                           | Group088 | 6,26  | 27,00  |
| GO:0009991 | response to extracellular stimulus                             | GO_BiologicalProcess-EBI-UniProt-GOA-ACAP-ARAP_08.05.2020_00h00 | 0,01026558 | 0,040701646 | 0,01026558 | 0,01164971 | [3]                                 | Group023 | 5,97  | 36,00  |
| GO:0039702 | viral budding via host ESCRT complex                           | GO_BiologicalProcess-EBI-UniProt-GOA-ACAP-ARAP_08.05.2020_00h00 | 0,01024521 | 0,040841632 | 0,01024521 | 0,0117587  | [5, 6, 7]                           | Group026 | 18,18 | 4,00   |
| GO:0032088 | negative regulation of NF-kappaB transcription factor activity | GO_BiologicalProcess-EBI-UniProt-GOA-ACAP-ARAP_08.05.2020_00h00 | 0,01017478 | 0,040782515 | 0,01017478 | 0,0118121  | [3, 4, 5, 8, 9, 10, 11, 12, 13, 14] | Group022 | 9,89  | 9,00   |
| GO:0051549 | positive regulation of keratinocyte migration                  | GO_BiologicalProcess-EBI-UniProt-GOA-ACAP-ARAP_08.05.2020_00h00 | 0,01052948 | 0,041191343 | 0,01052948 | 0,01181642 | [4, 5, 6, 7, 8, 9]                  | Group002 | 25,00 | 3,00   |
| GO:0014029 | neural crest formation                                         | GO_BiologicalProcess-EBI-UniProt-GOA-ACAP-ARAP_08.05.2020_00h00 | 0,01052948 | 0,041191343 | 0,01052948 | 0,01181642 | [3, 4, 5, 6, 7, 8, 9]               | Group014 | 25,00 | 3,00   |
| GO:0006091 | generation of precursor metabolites and energy                 | GO_BiologicalProcess-EBI-UniProt-GOA-ACAP-ARAP_08.05.2020_00h00 | 0,01093451 | 0,042102177 | 0,01093451 | 0,01213611 | [3]                                 | Group037 | 5,98  | 35,00  |
| GO:0015980 | energy derivation by oxidation of organic compounds            | GO_BiologicalProcess-EBI-UniProt-GOA-ACAP-ARAP_08.05.2020_00h00 | 0,00499962 | 0,025378708 | 0,01093451 | 0,01213611 | [3, 4]                              | Group037 | 7,26  | 22,00  |
| GO:0002366 | leukocyte activation involved in immune response               | GO_BiologicalProcess-EBI-UniProt-GOA-ACAP-ARAP_08.05.2020_00h00 | 0,01188678 | 0,044035126 | 0,01188678 | 0,0129093  | [3, 4]                              | Group029 | 5,66  | 44,00  |
| GO:0032011 | ARF protein signal transduction                                | GO_BiologicalProcess-EBI-UniProt-GOA-ACAP-ARAP_08.05.2020_00h00 | 0,01201947 | 0,044302911 | 0,01201947 | 0,01291453 | [6, 7, 8]                           | Group039 | 17,39 | 4,00   |
| GO:0032012 | regulation of ARF protein signal transduction                  | GO_BiologicalProcess-EBI-UniProt-GOA-ACAP-ARAP_08.05.2020_00h00 | 0,01201947 | 0,044302911 | 0,01201947 | 0,01291453 | [7, 8, 9]                           | Group039 | 17,39 | 4,00   |
| GO:0016055 | Wnt signaling pathway                                          | GO_BiologicalProcess-EBI-UniProt-GOA-ACAP-ARAP_08.05.2020_00h00 | 0,01180008 | 0,044386465 | 0,01180008 | 0,01295444 | [4, 5, 6, 7]                        | Group017 | 6,03  | 33,00  |
| GO:0007044 | cell-substrate junction assembly                               | GO_BiologicalProcess-EBI-UniProt-GOA-ACAP-ARAP_08.05.2020_00h00 | 0,0122656  | 0,0448719   | 0,0122656  | 0,01304027 | [6]                                 | Group013 | 9,09  | 10,00  |
| GO:0050662 | coenzyme binding                                               | GO_MolecularFunction-EBI-UniProt-GOA-ACAP-ARAP_08.05.2020_00h00 | 0,01251242 | 0,045547713 | 0,01251242 | 0,01316411 | [3]                                 | Group000 | 6,69  | 22,00  |
| GO:0007599 | hemostasis                                                     | GO_BiologicalProcess-EBI-UniProt-GOA-ACAP-ARAP_08.05.2020_00h00 | 0,01286614 | 0,046374995 | 0,01286614 | 0,0133967  | [4]                                 | Group015 | 6,50  | 24,00  |
| GO:0017004 | cytochrome complex assembly                                    | GO_BiologicalProcess-EBI-UniProt-GOA-ACAP-ARAP_08.05.2020_00h00 | 0,0133187  | 0,04730878  | 0,0133187  | 0,01345188 | [7]                                 | Group018 | 13,89 | 5,00   |

|            |                                                           |                                                                 |            |             |            |            |                      |          |       |       |
|------------|-----------------------------------------------------------|-----------------------------------------------------------------|------------|-------------|------------|------------|----------------------|----------|-------|-------|
| GO:0006123 | mitochondrial electron transport, cytochrome c to oxygen  | GO_BiologicalProcess-EBI-UniProt-GOA-ACAP-ARAP_08.05.2020_00h00 | 0,00864971 | 0,036780071 | 0,0133187  | 0,01345188 | [6, 7, 8, 9]         | Group034 | 19,05 | 4,00  |
| GO:0004129 | cytochrome-c oxidase activity                             | GO_BiologicalProcess-EBI-UniProt-GOA-ACAP-ARAP_08.05.2020_00h00 | 0,01048958 | 0,041366164 | 0,0133187  | 0,01345188 | [5, 6, 8, 9, 10, 11] | Group034 | 14,71 | 5,00  |
| GO:0030515 | snoRNA binding                                            | GO_MolecularFunction-EBI-UniProt-GOA-ACAP-ARAP_08.05.2020_00h00 | 0,0133187  | 0,04730878  | 0,0133187  | 0,01345188 | [5]                  | Group040 | 13,89 | 5,00  |
| GO:0034511 | U3 snoRNA binding                                         | GO_MolecularFunction-EBI-UniProt-GOA-ACAP-ARAP_08.05.2020_00h00 | 0,00439531 | 0,02319398  | 0,0133187  | 0,01345188 | [6]                  | Group040 | 33,33 | 3,00  |
| GO:1902337 | regulation of apoptotic process involved in morphogenesis | GO_BiologicalProcess-EBI-UniProt-GOA-ACAP-ARAP_08.05.2020_00h00 | 0,01328916 | 0,047433581 | 0,01328916 | 0,01355763 | [4, 5, 7, 8]         | Group008 | 23,08 | 3,00  |
| GO:0042180 | cellular ketone metabolic process                         | GO_BiologicalProcess-EBI-UniProt-GOA-ACAP-ARAP_08.05.2020_00h00 | 0,01322385 | 0,047315594 | 0,01322385 | 0,01362867 | [3]                  | Group062 | 6,96  | 19,00 |
| GO:0042181 | ketone biosynthetic process                               | GO_BiologicalProcess-EBI-UniProt-GOA-ACAP-ARAP_08.05.2020_00h00 | 0,00240326 | 0,016025348 | 0,01322385 | 0,01362867 | [4]                  | Group062 | 14,89 | 7,00  |
| GO:0010566 | regulation of ketone biosynthetic process                 | GO_BiologicalProcess-EBI-UniProt-GOA-ACAP-ARAP_08.05.2020_00h00 | 0,00390163 | 0,021763094 | 0,01322385 | 0,01362867 | [5, 6]               | Group062 | 23,53 | 4,00  |
| GO:0006744 | ubiquinone biosynthetic process                           | GO_BiologicalProcess-EBI-UniProt-GOA-ACAP-ARAP_08.05.2020_00h00 | 0,00390163 | 0,021763094 | 0,01322385 | 0,01362867 | [6, 7]               | Group062 | 23,53 | 4,00  |
| GO:0030155 | regulation of cell adhesion                               | GO_BiologicalProcess-EBI-UniProt-GOA-ACAP-ARAP_08.05.2020_00h00 | 0,0002975  | 0,003281432 | 0,02375092 | 0,02375092 | [3, 4]               | Group066 | 6,62  | 50,00 |
| GO:0035295 | tube development                                          | GO_BiologicalProcess-EBI-UniProt-GOA-ACAP-ARAP_08.05.2020_00h00 | 0,00965585 | 0,039567392 | 0,02375092 | 0,02375092 | [3, 4]               | Group066 | 5,39  | 61,00 |
| GO:0007162 | negative regulation of cell adhesion                      | GO_BiologicalProcess-EBI-UniProt-GOA-ACAP-ARAP_08.05.2020_00h00 | 0,00803831 | 0,035095848 | 0,02375092 | 0,02375092 | [3, 4, 5]            | Group066 | 7,07  | 21,00 |
| GO:0022407 | regulation of cell-cell adhesion                          | GO_BiologicalProcess-EBI-UniProt-GOA-ACAP-ARAP_08.05.2020_00h00 | 0,00207315 | 0,014692351 | 0,02375092 | 0,02375092 | [4, 5]               | Group066 | 6,92  | 31,00 |
| GO:0030334 | regulation of cell migration                              | GO_BiologicalProcess-EBI-UniProt-GOA-ACAP-ARAP_08.05.2020_00h00 | 0,01196401 | 0,044209588 | 0,02375092 | 0,02375092 | [4, 5, 6]            | Group066 | 5,50  | 51,00 |
