# Supplementary material for: Analysis of the Role of FRMD5 in the Biology of Papillary Thyroid Carcinoma
Source: MDPI journal article supplement (doi:10.3390/ijms22136726), 2021-06-23
Supplement: s1 [file s1]

**Supplementary Table S8. Gene ontology (GO) enrichment analysis of the downregulated genes in BCPAP siFRMD5 (in comparison with BCPAP siNEG).**

| GOID       | GO Term                                                             | Ontology Source                                                 | Term PValue | Term PValue<br>Corrected<br>with<br>Benjamini-<br>Hochberg | Group<br>PValue | Group PValue<br>Corrected<br>with<br>Benjamini-<br>Hochberg | GO Levels           | GO Groups | %<br>Associated<br>Genes | Nr.<br>Genes |
|------------|---------------------------------------------------------------------|-----------------------------------------------------------------|-------------|------------------------------------------------------------|-----------------|-------------------------------------------------------------|---------------------|-----------|--------------------------|--------------|
| GO:0007018 | microtubule-based movement                                          | GO_BiologicalProcess-EBI-UniProt-GOA-ACAP-ARAP_08.05.2020_00h00 | 3,81545E-06 | 0,00051509                                                 | 7,44462E-07     | 2,1589E-05                                                  | [3]                 | Group26   | 7,47                     | 23,00        |
| GO:0051656 | establishment of organelle localization                             | GO_BiologicalProcess-EBI-UniProt-GOA-ACAP-ARAP_08.05.2020_00h00 | 0,003018338 | 0,03595373                                                 | 7,44462E-07     | 2,1589E-05                                                  | [3, 4]              | Group26   | 4,81                     | 22,00        |
| GO:0003341 | cilium movement                                                     | GO_BiologicalProcess-EBI-UniProt-GOA-ACAP-ARAP_08.05.2020_00h00 | 0,004320167 | 0,0364514                                                  | 7,44462E-07     | 2,1589E-05                                                  | [4]                 | Group26   | 8,64                     | 7,00         |
| GO:0099111 | microtubule-based transport                                         | GO_BiologicalProcess-EBI-UniProt-GOA-ACAP-ARAP_08.05.2020_00h00 | 5,07271E-06 | 0,00051361                                                 | 7,44462E-07     | 2,1589E-05                                                  | [4]                 | Group26   | 8,74                     | 18,00        |
| GO:0030705 | cytoskeleton-dependent intracellular transport                      | GO_BiologicalProcess-EBI-UniProt-GOA-ACAP-ARAP_08.05.2020_00h00 | 8,62051E-06 | 0,00069826                                                 | 7,44462E-07     | 2,1589E-05                                                  | [4, 5]              | Group26   | 8,41                     | 18,00        |
| GO:0010970 | transport along microtubule                                         | GO_BiologicalProcess-EBI-UniProt-GOA-ACAP-ARAP_08.05.2020_00h00 | 0,000145428 | 0,00654426                                                 | 7,44462E-07     | 2,1589E-05                                                  | [5, 6]              | Group26   | 8,00                     | 14,00        |
| GO:0098840 | protein transport along microtubule                                 | GO_BiologicalProcess-EBI-UniProt-GOA-ACAP-ARAP_08.05.2020_00h00 | 0,000491532 | 0,01327137                                                 | 7,44462E-07     | 2,1589E-05                                                  | [5, 6, 7, 8, 9]     | Group26   | 10,96                    | 8,00         |
| GO:0042073 | intraciliary transport                                              | GO_BiologicalProcess-EBI-UniProt-GOA-ACAP-ARAP_08.05.2020_00h00 | 0,002533206 | 0,03419828                                                 | 7,44462E-07     | 2,1589E-05                                                  | [5, 6, 7, 8, 9, 10] | Group26   | 10,91                    | 6,00         |
| GO:0007018 | microtubule-based movement                                          | GO_BiologicalProcess-EBI-UniProt-GOA-ACAP-ARAP_08.05.2020_00h00 | 3,81545E-06 | 0,00051509                                                 | 4,25032E-06     | 6,163E-05                                                   | [3]                 | Group23   | 7,47                     | 23,00        |
| GO:0003341 | cilium movement                                                     | GO_BiologicalProcess-EBI-UniProt-GOA-ACAP-ARAP_08.05.2020_00h00 | 0,004320167 | 0,0364514                                                  | 4,25032E-06     | 6,163E-05                                                   | [4]                 | Group23   | 8,64                     | 7,00         |
| GO:0003351 | epithelial cilium movement involved in extracellular fluid movement | GO_BiologicalProcess-EBI-UniProt-GOA-ACAP-ARAP_08.05.2020_00h00 | 0,007314167 | 0,04356232                                                 | 4,25032E-06     | 6,163E-05                                                   | [5]                 | Group23   | 12,90                    | 4,00         |
| GO:0036158 | outer dynein arm assembly                                           | GO_BiologicalProcess-EBI-UniProt-GOA-ACAP-ARAP_08.05.2020_00h00 | 0,009795591 | 0,04779777                                                 | 4,25032E-06     | 6,163E-05                                                   | [7, 8, 9, 10]       | Group23   | 16,67                    | 3,00         |
| GO:0036159 | inner dynein arm assembly                                           | GO_BiologicalProcess-EBI-UniProt-GOA-ACAP-ARAP_08.05.2020_00h00 | 0,005776326 | 0,04332244                                                 | 4,25032E-06     | 6,163E-05                                                   | [7, 8, 9, 10]       | Group23   | 20,00                    | 3,00         |
| GO:0032886 | regulation of microtubule-based process                             | GO_BiologicalProcess-EBI-UniProt-GOA-ACAP-ARAP_08.05.2020_00h00 | 0,004141333 | 0,03727199                                                 | 1,10085E-05     | 7,9812E-05                                                  | [3, 4]              | Group29   | 5,67                     | 14,00        |
| GO:0051129 | negative regulation of cellular component organization              | GO_BiologicalProcess-EBI-UniProt-GOA-ACAP-ARAP_08.05.2020_00h00 | 0,000690086 | 0,01330881                                                 | 1,10085E-05     | 7,9812E-05                                                  | [3, 4, 5]           | Group29   | 4,50                     | 35,00        |
| GO:0000226 | microtubule cytoskeleton organization                               | GO_BiologicalProcess-EBI-UniProt-GOA-ACAP-ARAP_08.05.2020_00h00 | 0,002389811 | 0,03456692                                                 | 1,10085E-05     | 7,9812E-05                                                  | [3, 6]              | Group29   | 4,49                     | 28,00        |
| GO:0033043 | regulation of organelle organization                                | GO_BiologicalProcess-EBI-UniProt-GOA-ACAP-ARAP_08.05.2020_00h00 | 0,000180345 | 0,00730399                                                 | 1,10085E-05     | 7,9812E-05                                                  | [4, 5]              | Group29   | 4,11                     | 57,00        |
| GO:0007098 | centrosome cycle                                                    | GO_BiologicalProcess-EBI-UniProt-GOA-ACAP-ARAP_08.05.2020_00h00 | 0,006605746 | 0,04385782                                                 | 1,10085E-05     | 7,9812E-05                                                  | [3, 4, 5, 8]        | Group29   | 6,77                     | 9,00         |
| GO:0010639 | negative regulation of organelle organization                       | GO_BiologicalProcess-EBI-UniProt-GOA-ACAP-ARAP_08.05.2020_00h00 | 0,000843036 | 0,01551953                                                 | 1,10085E-05     | 7,9812E-05                                                  | [4, 5, 6]           | Group29   | 5,23                     | 23,00        |
| GO:0070925 | organelle assembly                                                  | GO_BiologicalProcess-EBI-UniProt-GOA-ACAP-ARAP_08.05.2020_00h00 | 5,21096E-05 | 0,00301491                                                 | 1,10085E-05     | 7,9812E-05                                                  | [5]                 | Group29   | 4,75                     | 43,00        |

|            |                                                                         |                                                                 |             |            |             |            |                        |         |       |       |
|------------|-------------------------------------------------------------------------|-----------------------------------------------------------------|-------------|------------|-------------|------------|------------------------|---------|-------|-------|
| GO:0120036 | plasma membrane bounded cell projection organization                    | GO_BiologicalProcess-EBI-UniProt-GOA-ACAP-ARAP_08.05.2020_00h00 | 3,95132E-05 | 0,00266714 | 1,10085E-05 | 7,9812E-05 | [5]                    | Group29 | 4,13  | 67,00 |
| GO:1902115 | regulation of organelle assembly                                        | GO_BiologicalProcess-EBI-UniProt-GOA-ACAP-ARAP_08.05.2020_00h00 | 0,000240963 | 0,00887181 | 1,10085E-05 | 7,9812E-05 | [4, 5, 6]              | Group29 | 7,28  | 15,00 |
| GO:0051298 | centrosome duplication                                                  | GO_BiologicalProcess-EBI-UniProt-GOA-ACAP-ARAP_08.05.2020_00h00 | 0,009555393 | 0,04777696 | 1,10085E-05 | 7,9812E-05 | [3, 4, 5, 6, 9]        | Group29 | 8,33  | 6,00  |
| GO:0044782 | cilium organization                                                     | GO_BiologicalProcess-EBI-UniProt-GOA-ACAP-ARAP_08.05.2020_00h00 | 1,73402E-06 | 0,00070228 | 1,10085E-05 | 7,9812E-05 | [5, 6]                 | Group29 | 6,88  | 28,00 |
| GO:0051493 | regulation of cytoskeleton organization                                 | GO_BiologicalProcess-EBI-UniProt-GOA-ACAP-ARAP_08.05.2020_00h00 | 0,007308025 | 0,04417538 | 1,10085E-05 | 7,9812E-05 | [5, 6]                 | Group29 | 4,28  | 25,00 |
| GO:0070507 | regulation of microtubule cytoskeleton organization                     | GO_BiologicalProcess-EBI-UniProt-GOA-ACAP-ARAP_08.05.2020_00h00 | 0,00642897  | 0,04339555 | 1,10085E-05 | 7,9812E-05 | [4, 5, 6, 7]           | Group29 | 5,80  | 12,00 |
| GO:0120035 | regulation of plasma membrane bounded cell projection organization      | GO_BiologicalProcess-EBI-UniProt-GOA-ACAP-ARAP_08.05.2020_00h00 | 0,007689316 | 0,04386159 | 1,10085E-05 | 7,9812E-05 | [5, 6]                 | Group29 | 4,04  | 30,00 |
| GO:1902117 | positive regulation of organelle assembly                               | GO_BiologicalProcess-EBI-UniProt-GOA-ACAP-ARAP_08.05.2020_00h00 | 0,003758924 | 0,03903498 | 1,10085E-05 | 7,9812E-05 | [4, 5, 6, 7]           | Group29 | 8,86  | 7,00  |
| GO:0051494 | negative regulation of cytoskeleton organization                        | GO_BiologicalProcess-EBI-UniProt-GOA-ACAP-ARAP_08.05.2020_00h00 | 0,003792188 | 0,03745941 | 1,10085E-05 | 7,9812E-05 | [5, 6, 7]              | Group29 | 6,51  | 11,00 |
| GO:0097711 | ciliary basal body-plasma membrane docking                              | GO_BiologicalProcess-EBI-UniProt-GOA-ACAP-ARAP_08.05.2020_00h00 | 0,003552196 | 0,03785893 | 1,10085E-05 | 7,9812E-05 | [4, 5, 7, 8]           | Group29 | 8,08  | 8,00  |
| GO:0120031 | plasma membrane bounded cell projection assembly                        | GO_BiologicalProcess-EBI-UniProt-GOA-ACAP-ARAP_08.05.2020_00h00 | 3,70553E-06 | 0,00075037 | 1,10085E-05 | 7,9812E-05 | [6]                    | Group29 | 5,85  | 35,00 |
| GO:0120032 | regulation of plasma membrane bounded cell projection assembly          | GO_BiologicalProcess-EBI-UniProt-GOA-ACAP-ARAP_08.05.2020_00h00 | 0,000491566 | 0,01244277 | 1,10085E-05 | 7,9812E-05 | [5, 6, 7]              | Group29 | 7,11  | 14,00 |
| GO:0120034 | positive regulation of plasma membrane bounded cell projection assembly | GO_BiologicalProcess-EBI-UniProt-GOA-ACAP-ARAP_08.05.2020_00h00 | 0,008254359 | 0,04517588 | 1,10085E-05 | 7,9812E-05 | [4, 5, 6, 7, 8]        | Group29 | 7,02  | 8,00  |
| GO:0046605 | regulation of centrosome cycle                                          | GO_BiologicalProcess-EBI-UniProt-GOA-ACAP-ARAP_08.05.2020_00h00 | 0,005017432 | 0,0406412  | 1,10085E-05 | 7,9812E-05 | [4, 5, 6, 7, 8, 9]     | Group29 | 9,52  | 6,00  |
| GO:1902017 | regulation of cilium assembly                                           | GO_BiologicalProcess-EBI-UniProt-GOA-ACAP-ARAP_08.05.2020_00h00 | 0,0001401   | 0,00709256 | 1,10085E-05 | 7,9812E-05 | [5, 6, 7, 8]           | Group29 | 13,11 | 8,00  |
| GO:0051640 | organelle localization                                                  | GO_BiologicalProcess-EBI-UniProt-GOA-ACAP-ARAP_08.05.2020_00h00 | 0,000314103 | 0,00978551 | 1,06653E-05 | 0,0001031  | [3]                    | Group21 | 4,81  | 33,00 |
| GO:0051656 | establishment of organelle localization                                 | GO_BiologicalProcess-EBI-UniProt-GOA-ACAP-ARAP_08.05.2020_00h00 | 0,003018338 | 0,03595373 | 1,06653E-05 | 0,0001031  | [3, 4]                 | Group21 | 4,81  | 22,00 |
| GO:0051648 | vesicle localization                                                    | GO_BiologicalProcess-EBI-UniProt-GOA-ACAP-ARAP_08.05.2020_00h00 | 0,000468468 | 0,0135521  | 1,06653E-05 | 0,0001031  | [4]                    | Group21 | 6,58  | 16,00 |
| GO:0030705 | cytoskeleton-dependent intracellular transport                          | GO_BiologicalProcess-EBI-UniProt-GOA-ACAP-ARAP_08.05.2020_00h00 | 8,62051E-06 | 0,00069826 | 1,06653E-05 | 0,0001031  | [4, 5]                 | Group21 | 8,41  | 18,00 |
| GO:0043970 | histone H3-K9 acetylation                                               | GO_BiologicalProcess-EBI-UniProt-GOA-ACAP-ARAP_08.05.2020_00h00 | 0,003769295 | 0,03816412 | 0,000226447 | 0,00131339 | [8, 9, 10, 11, 12, 13] | Group27 | 23,08 | 3,00  |
| GO:0003007 | heart morphogenesis                                                     | GO_BiologicalProcess-EBI-UniProt-GOA-ACAP-ARAP_08.05.2020_00h00 | 0,010306201 | 0,04797714 | 0,000226447 | 0,00131339 | [4, 5, 6, 7]           | Group27 | 5,09  | 14,00 |
| GO:1902275 | regulation of chromatin organization                                    | GO_BiologicalProcess-EBI-UniProt-GOA-ACAP-ARAP_08.05.2020_00h00 | 0,006192945 | 0,04400251 | 0,000226447 | 0,00131339 | [5, 6, 7]              | Group27 | 5,83  | 12,00 |
| GO:0003208 | cardiac ventricle morphogenesis                                         | GO_BiologicalProcess-EBI-UniProt-GOA-ACAP-ARAP_08.05.2020_00h00 | 0,010866376 | 0,04889869 | 0,000226447 | 0,00131339 | [4, 5, 6, 7, 8, 9]     | Group27 | 8,11  | 6,00  |

|            |                                                                  |                                                                 |             |            |             |            |                              |         |       |       |
|------------|------------------------------------------------------------------|-----------------------------------------------------------------|-------------|------------|-------------|------------|------------------------------|---------|-------|-------|
| GO:0010717 | regulation of epithelial to mesenchymal transition               | GO_BiologicalProcess-EBI-UniProt-GOA-ACAP-ARAP_08.05.2020_00h00 | 0,008607737 | 0,04527446 | 0,000226447 | 0,00131339 | [4, 5, 6, 7, 8, 9]           | Group27 | 7,61  | 7,00  |
| GO:0043543 | protein acylation                                                | GO_BiologicalProcess-EBI-UniProt-GOA-ACAP-ARAP_08.05.2020_00h00 | 0,006248162 | 0,0436294  | 0,000226447 | 0,00131339 | [6, 7]                       | Group27 | 5,41  | 14,00 |
| GO:2000136 | regulation of cell proliferation involved in heart morphogenesis | GO_BiologicalProcess-EBI-UniProt-GOA-ACAP-ARAP_08.05.2020_00h00 | 0,011417896 | 0,0497231  | 0,000226447 | 0,00131339 | [4, 5, 6, 7, 8, 9]           | Group27 | 15,79 | 3,00  |
| GO:2000826 | regulation of heart morphogenesis                                | GO_BiologicalProcess-EBI-UniProt-GOA-ACAP-ARAP_08.05.2020_00h00 | 0,004815062 | 0,03979796 | 0,000226447 | 0,00131339 | [5, 6, 7, 8]                 | Group27 | 11,36 | 5,00  |
| GO:0060956 | endocardial cell differentiation                                 | GO_BiologicalProcess-EBI-UniProt-GOA-ACAP-ARAP_08.05.2020_00h00 | 0,000300709 | 0,01014893 | 0,000226447 | 0,00131339 | [4, 6, 7, 8, 9]              | Group27 | 50,00 | 3,00  |
| GO:1901983 | regulation of protein acetylation                                | GO_BiologicalProcess-EBI-UniProt-GOA-ACAP-ARAP_08.05.2020_00h00 | 0,010866376 | 0,04889869 | 0,000226447 | 0,00131339 | [6, 7, 8, 9]                 | Group27 | 8,11  | 6,00  |
| GO:0001657 | ureteric bud development                                         | GO_BiologicalProcess-EBI-UniProt-GOA-ACAP-ARAP_08.05.2020_00h00 | 0,006699307 | 0,0437616  | 0,000226447 | 0,00131339 | [5, 6, 8, 9, 10, 11]         | Group27 | 7,27  | 8,00  |
| GO:0060675 | ureteric bud morphogenesis                                       | GO_BiologicalProcess-EBI-UniProt-GOA-ACAP-ARAP_08.05.2020_00h00 | 0,008944069 | 0,0458525  | 0,000226447 | 0,00131339 | [6, 7, 8, 9, 10, 11, 12, 13] | Group27 | 8,45  | 6,00  |
| GO:0032550 | purine ribonucleoside binding                                    | GO_MolecularFunction-EBI-UniProt-GOA-ACAP-ARAP_08.05.2020_00h00 | 0,000678931 | 0,01374836 | 0,000493656 | 0,002386   | [5]                          | Group19 | 5,31  | 23,00 |
| GO:0032561 | guanyl ribonucleotide binding                                    | GO_MolecularFunction-EBI-UniProt-GOA-ACAP-ARAP_08.05.2020_00h00 | 0,000493656 | 0,01176063 | 0,000493656 | 0,002386   | [5, 6, 7]                    | Group19 | 5,33  | 24,00 |
| GO:0000910 | cytokinesis                                                      | GO_BiologicalProcess-EBI-UniProt-GOA-ACAP-ARAP_08.05.2020_00h00 | 0,005824229 | 0,04288751 | 0,000878179 | 0,00363817 | [3, 4]                       | Group14 | 6,15  | 11,00 |
| GO:0051781 | positive regulation of cell division                             | GO_BiologicalProcess-EBI-UniProt-GOA-ACAP-ARAP_08.05.2020_00h00 | 0,002936431 | 0,03603801 | 0,000878179 | 0,00363817 | [3, 4, 5]                    | Group14 | 8,33  | 8,00  |
| GO:0048755 | branching morphogenesis of a nerve                               | GO_BiologicalProcess-EBI-UniProt-GOA-ACAP-ARAP_08.05.2020_00h00 | 0,001673155 | 0,02823449 | 0,001319666 | 0,00478379 | [3, 4, 5, 6]                 | Group13 | 30,00 | 3,00  |
| GO:0021544 | subpallium development                                           | GO_BiologicalProcess-EBI-UniProt-GOA-ACAP-ARAP_08.05.2020_00h00 | 0,003836539 | 0,03699519 | 0,001319666 | 0,00478379 | [3, 4, 5, 7, 8, 9, 10]       | Group13 | 15,38 | 4,00  |
| GO:0008015 | blood circulation                                                | GO_BiologicalProcess-EBI-UniProt-GOA-ACAP-ARAP_08.05.2020_00h00 | 0,001739129 | 0,02817389 | 0,001918974 | 0,00556502 | [4]                          | Group25 | 4,66  | 27,00 |
| GO:0090257 | regulation of muscle system process                              | GO_BiologicalProcess-EBI-UniProt-GOA-ACAP-ARAP_08.05.2020_00h00 | 0,009854881 | 0,04751461 | 0,001918974 | 0,00556502 | [4, 5]                       | Group25 | 5,28  | 13,00 |
| GO:1903522 | regulation of blood circulation                                  | GO_BiologicalProcess-EBI-UniProt-GOA-ACAP-ARAP_08.05.2020_00h00 | 0,005426986 | 0,04226787 | 0,001918974 | 0,00556502 | [4, 5]                       | Group25 | 5,18  | 16,00 |
| GO:0045932 | negative regulation of muscle contraction                        | GO_BiologicalProcess-EBI-UniProt-GOA-ACAP-ARAP_08.05.2020_00h00 | 0,003311349 | 0,03725268 | 0,001918974 | 0,00556502 | [3, 4, 5, 6, 7]              | Group25 | 16,00 | 4,00  |
| GO:0060047 | heart contraction                                                | GO_BiologicalProcess-EBI-UniProt-GOA-ACAP-ARAP_08.05.2020_00h00 | 0,007254847 | 0,04451838 | 0,001918974 | 0,00556502 | [5]                          | Group25 | 5,15  | 15,00 |
| GO:0055117 | regulation of cardiac muscle contraction                         | GO_BiologicalProcess-EBI-UniProt-GOA-ACAP-ARAP_08.05.2020_00h00 | 0,006792301 | 0,04366479 | 0,001918974 | 0,00556502 | [6, 7, 8]                    | Group25 | 7,95  | 7,00  |
| GO:0055118 | negative regulation of cardiac muscle contraction                | GO_BiologicalProcess-EBI-UniProt-GOA-ACAP-ARAP_08.05.2020_00h00 | 0,000300709 | 0,01014893 | 0,001918974 | 0,00556502 | [5, 6, 7, 8, 9]              | Group25 | 50,00 | 3,00  |
| GO:0060322 | head development                                                 | GO_BiologicalProcess-EBI-UniProt-GOA-ACAP-ARAP_08.05.2020_00h00 | 0,001750239 | 0,02726334 | 0,001750239 | 0,00563966 | [3]                          | Group15 | 4,20  | 37,00 |
| GO:0007420 | brain development                                                | GO_BiologicalProcess-EBI-UniProt-GOA-ACAP-ARAP_08.05.2020_00h00 | 0,004225209 | 0,03640872 | 0,001750239 | 0,00563966 | [4, 5, 6, 7]                 | Group15 | 4,07  | 34,00 |
| GO:0065004 | protein-DNA complex assembly                                     | GO_BiologicalProcess-EBI-UniProt-GOA-ACAP-ARAP_08.05.2020_00h00 | 0,002584411 | 0,03376408 | 0,002584411 | 0,00576522 | [6, 7]                       | Group05 | 5,77  | 15,00 |

|            |                                                   |                                                                 |             |            |             |            |                       |         |       |       |
|------------|---------------------------------------------------|-----------------------------------------------------------------|-------------|------------|-------------|------------|-----------------------|---------|-------|-------|
| GO:0043462 | regulation of ATPase activity                     | GO_BiologicalProcess-EBI-UniProt-GOA-ACAP-ARAP_08.05.2020_00h00 | 0,001253543 | 0,02207326 | 0,0021924   | 0,00577996 | [5]                   | Group20 | 9,52  | 8,00  |
| GO:0060589 | nucleoside-triphosphatase regulator activity      | GO_BiologicalProcess-EBI-UniProt-GOA-ACAP-ARAP_08.05.2020_00h00 | 0,011320079 | 0,04983296 | 0,0021924   | 0,00577996 | [5]                   | Group20 | 4,67  | 17,00 |
| GO:0060590 | ATPase regulator activity                         | GO_BiologicalProcess-EBI-UniProt-GOA-ACAP-ARAP_08.05.2020_00h00 | 0,003167177 | 0,03664877 | 0,0021924   | 0,00577996 | [6]                   | Group20 | 12,50 | 5,00  |
| GO:0051097 | negative regulation of helicase activity          | GO_BiologicalProcess-EBI-UniProt-GOA-ACAP-ARAP_08.05.2020_00h00 | 0,000300709 | 0,01014893 | 0,0021924   | 0,00577996 | [7]                   | Group20 | 50,00 | 3,00  |
| GO:0035809 | regulation of urine volume                        | GO_BiologicalProcess-EBI-UniProt-GOA-ACAP-ARAP_08.05.2020_00h00 | 0,002411896 | 0,03368338 | 0,002411896 | 0,00582875 | [4]                   | Group12 | 17,39 | 4,00  |
| GO:0060337 | type I interferon signaling pathway               | GO_BiologicalProcess-EBI-UniProt-GOA-ACAP-ARAP_08.05.2020_00h00 | 0,002936431 | 0,03603801 | 0,002936431 | 0,00608261 | [5, 6, 7, 8, 9]       | Group04 | 8,33  | 8,00  |
| GO:0001504 | neurotransmitter uptake                           | GO_BiologicalProcess-EBI-UniProt-GOA-ACAP-ARAP_08.05.2020_00h00 | 0,009784135 | 0,04832408 | 0,004099257 | 0,00699285 | [4, 5]                | Group28 | 9,62  | 5,00  |
| GO:0051580 | regulation of neurotransmitter uptake             | GO_BiologicalProcess-EBI-UniProt-GOA-ACAP-ARAP_08.05.2020_00h00 | 0,002837319 | 0,03590982 | 0,004099257 | 0,00699285 | [4, 5, 6]             | Group28 | 16,67 | 4,00  |
| GO:0051952 | regulation of amine transport                     | GO_BiologicalProcess-EBI-UniProt-GOA-ACAP-ARAP_08.05.2020_00h00 | 0,00507975  | 0,04033919 | 0,004099257 | 0,00699285 | [4, 5, 6]             | Group28 | 7,62  | 8,00  |
| GO:0051953 | negative regulation of amine transport            | GO_BiologicalProcess-EBI-UniProt-GOA-ACAP-ARAP_08.05.2020_00h00 | 0,005743539 | 0,04388931 | 0,004099257 | 0,00699285 | [3, 4, 5, 6, 7]       | Group28 | 13,79 | 4,00  |
| GO:0014059 | regulation of dopamine secretion                  | GO_BiologicalProcess-EBI-UniProt-GOA-ACAP-ARAP_08.05.2020_00h00 | 0,003929641 | 0,03701174 | 0,004099257 | 0,00699285 | [3, 4, 5, 6, 7, 8, 9] | Group28 | 11,90 | 5,00  |
| GO:0015872 | dopamine transport                                | GO_BiologicalProcess-EBI-UniProt-GOA-ACAP-ARAP_08.05.2020_00h00 | 0,002304964 | 0,03457446 | 0,004099257 | 0,00699285 | [5, 6, 7]             | Group28 | 11,11 | 6,00  |
| GO:0045921 | positive regulation of exocytosis                 | GO_BiologicalProcess-EBI-UniProt-GOA-ACAP-ARAP_08.05.2020_00h00 | 0,01075657  | 0,04894843 | 0,004099257 | 0,00699285 | [4, 5, 6, 7, 8]       | Group28 | 7,29  | 7,00  |
| GO:0032225 | regulation of synaptic transmission, dopaminergic | GO_BiologicalProcess-EBI-UniProt-GOA-ACAP-ARAP_08.05.2020_00h00 | 0,000570006 | 0,01282513 | 0,004099257 | 0,00699285 | [5, 6, 7, 8, 9]       | Group28 | 25,00 | 4,00  |
| GO:0014047 | glutamate secretion                               | GO_BiologicalProcess-EBI-UniProt-GOA-ACAP-ARAP_08.05.2020_00h00 | 0,008308607 | 0,04486648 | 0,004099257 | 0,00699285 | [4, 6, 7, 8, 9, 10]   | Group28 | 10,00 | 5,00  |
| GO:0001963 | synaptic transmission, dopaminergic               | GO_BiologicalProcess-EBI-UniProt-GOA-ACAP-ARAP_08.05.2020_00h00 | 0,008195748 | 0,04546956 | 0,004099257 | 0,00699285 | [7, 8]                | Group28 | 12,50 | 4,00  |
| GO:0006835 | dicarboxylic acid transport                       | GO_BiologicalProcess-EBI-UniProt-GOA-ACAP-ARAP_08.05.2020_00h00 | 0,007065354 | 0,04402259 | 0,004099257 | 0,00699285 | [7, 8]                | Group28 | 7,21  | 8,00  |
| GO:0015800 | acidic amino acid transport                       | GO_BiologicalProcess-EBI-UniProt-GOA-ACAP-ARAP_08.05.2020_00h00 | 0,001253543 | 0,02207326 | 0,004099257 | 0,00699285 | [6, 8, 9]             | Group28 | 9,52  | 8,00  |
| GO:1901216 | positive regulation of neuron death               | GO_BiologicalProcess-EBI-UniProt-GOA-ACAP-ARAP_08.05.2020_00h00 | 0,004015227 | 0,03695834 | 0,004015227 | 0,0072776  | [4, 5, 6]             | Group09 | 7,92  | 8,00  |
| GO:0000002 | mitochondrial genome maintenance                  | GO_BiologicalProcess-EBI-UniProt-GOA-ACAP-ARAP_08.05.2020_00h00 | 0,003836539 | 0,03699519 | 0,003836539 | 0,00741731 | [6]                   | Group00 | 15,38 | 4,00  |
| GO:0045444 | fat cell differentiation                          | GO_BiologicalProcess-EBI-UniProt-GOA-ACAP-ARAP_08.05.2020_00h00 | 0,008382128 | 0,04466792 | 0,008382128 | 0,00972327 | [4]                   | Group02 | 5,39  | 13,00 |
| GO:0006914 | autophagy                                         | GO_BiologicalProcess-EBI-UniProt-GOA-ACAP-ARAP_08.05.2020_00h00 | 0,006077953 | 0,04395663 | 0,006077953 | 0,00979226 | [3, 4]                | Group22 | 4,40  | 24,00 |
| GO:0010506 | regulation of autophagy                           | GO_BiologicalProcess-EBI-UniProt-GOA-ACAP-ARAP_08.05.2020_00h00 | 0,011320079 | 0,04983296 | 0,006077953 | 0,00979226 | [4, 5, 6]             | Group22 | 4,67  | 17,00 |
| GO:0000422 | autophagy of mitochondrion                        | GO_BiologicalProcess-EBI-UniProt-GOA-ACAP-ARAP_08.05.2020_00h00 | 0,001253543 | 0,02207326 | 0,006077953 | 0,00979226 | [4, 5, 7]             | Group22 | 9,52  | 8,00  |

|            |                                                       |                                                                 |             |            |             |            |                             |         |       |       |
|------------|-------------------------------------------------------|-----------------------------------------------------------------|-------------|------------|-------------|------------|-----------------------------|---------|-------|-------|
| GO:000045  | autophagosome assembly                                | GO_BiologicalProcess-EBI-UniProt-GOA-ACAP-ARAP_08.05.2020_00h00 | 0,003552196 | 0,03785893 | 0,006077953 | 0,00979226 | [6, 7]                      | Group22 | 8,08  | 8,00  |
| GO:0060325 | face morphogenesis                                    | GO_BiologicalProcess-EBI-UniProt-GOA-ACAP-ARAP_08.05.2020_00h00 | 0,008195748 | 0,04546956 | 0,008195748 | 0,0099032  | [3, 4, 5, 6]                | Group03 | 12,50 | 4,00  |
| GO:0045017 | glycerolipid biosynthetic process                     | GO_BiologicalProcess-EBI-UniProt-GOA-ACAP-ARAP_08.05.2020_00h00 | 0,007937216 | 0,04464684 | 0,007937216 | 0,01000779 | [4, 5, 6]                   | Group01 | 5,10  | 15,00 |
| GO:0010631 | epithelial cell migration                             | GO_BiologicalProcess-EBI-UniProt-GOA-ACAP-ARAP_08.05.2020_00h00 | 0,011507019 | 0,04957812 | 0,007653754 | 0,01008904 | [4, 5, 6]                   | Group24 | 4,89  | 15,00 |
| GO:0036303 | lymph vessel morphogenesis                            | GO_BiologicalProcess-EBI-UniProt-GOA-ACAP-ARAP_08.05.2020_00h00 | 0,011417896 | 0,0497231  | 0,007653754 | 0,01008904 | [3, 4, 6, 7, 8, 9]          | Group24 | 15,79 | 3,00  |
| GO:0038084 | vascular endothelial growth factor signaling pathway  | GO_BiologicalProcess-EBI-UniProt-GOA-ACAP-ARAP_08.05.2020_00h00 | 0,006395692 | 0,04390263 | 0,007653754 | 0,01008904 | [6, 7, 8]                   | Group24 | 10,64 | 5,00  |
| GO:0043534 | blood vessel endothelial cell migration               | GO_BiologicalProcess-EBI-UniProt-GOA-ACAP-ARAP_08.05.2020_00h00 | 0,004193723 | 0,036923   | 0,007653754 | 0,01008904 | [6, 7, 8]                   | Group24 | 7,26  | 9,00  |
| GO:0043535 | regulation of blood vessel endothelial cell migration | GO_BiologicalProcess-EBI-UniProt-GOA-ACAP-ARAP_08.05.2020_00h00 | 0,003336776 | 0,03652417 | 0,007653754 | 0,01008904 | [5, 6, 7, 8, 9]             | Group24 | 8,16  | 8,00  |
| GO:0061042 | vascular wound healing                                | GO_BiologicalProcess-EBI-UniProt-GOA-ACAP-ARAP_08.05.2020_00h00 | 0,009795591 | 0,04779777 | 0,007653754 | 0,01008904 | [5, 6, 7, 8, 9, 10, 11, 12] | Group24 | 16,67 | 3,00  |
| GO:0090311 | regulation of protein deacetylation                   | GO_BiologicalProcess-EBI-UniProt-GOA-ACAP-ARAP_08.05.2020_00h00 | 0,007632066 | 0,04415695 | 0,007632066 | 0,01053952 | [6, 7, 8, 9]                | Group07 | 10,20 | 5,00  |
| GO:0120163 | negative regulation of cold-induced thermogenesis     | GO_BiologicalProcess-EBI-UniProt-GOA-ACAP-ARAP_08.05.2020_00h00 | 0,007632066 | 0,04415695 | 0,007632066 | 0,01053952 | [3, 4, 5, 6, 7, 8]          | Group08 | 10,20 | 5,00  |
| GO:0062197 | cellular response to chemical stress                  | GO_BiologicalProcess-EBI-UniProt-GOA-ACAP-ARAP_08.05.2020_00h00 | 0,009463804 | 0,04791051 | 0,009463804 | 0,01055578 | [4]                         | Group16 | 4,66  | 18,00 |
| GO:0034599 | cellular response to oxidative stress                 | GO_BiologicalProcess-EBI-UniProt-GOA-ACAP-ARAP_08.05.2020_00h00 | 0,008637466 | 0,04484838 | 0,009463804 | 0,01055578 | [4, 5]                      | Group16 | 4,92  | 16,00 |
| GO:0034332 | adherens junction organization                        | GO_BiologicalProcess-EBI-UniProt-GOA-ACAP-ARAP_08.05.2020_00h00 | 0,010195925 | 0,04801569 | 0,010195925 | 0,01056007 | [6]                         | Group11 | 8,22  | 6,00  |
| GO:0070231 | T cell apoptotic process                              | GO_BiologicalProcess-EBI-UniProt-GOA-ACAP-ARAP_08.05.2020_00h00 | 0,010585342 | 0,04871663 | 0,010585342 | 0,01058534 | [7]                         | Group06 | 9,43  | 5,00  |
| GO:0030548 | acetylcholine receptor regulator activity             | GO_BiologicalProcess-EBI-UniProt-GOA-ACAP-ARAP_08.05.2020_00h00 | 0,006977784 | 0,04415629 | 0,006977784 | 0,0106503  | [6, 7, 8, 9, 10, 11]        | Group10 | 18,75 | 3,00  |
| GO:0008134 | transcription factor binding                          | GO_MolecularFunction-EBI-UniProt-GOA-ACAP-ARAP_08.05.2020_00h00 | 0,009982729 | 0,04756477 | 0,009982729 | 0,01072219 | [3]                         | Group17 | 4,00  | 29,00 |
| GO:0070491 | repressing transcription factor binding               | GO_MolecularFunction-EBI-UniProt-GOA-ACAP-ARAP_08.05.2020_00h00 | 0,000645692 | 0,01376343 | 0,009982729 | 0,01072219 | [5]                         | Group17 | 10,53 | 8,00  |
| GO:0140030 | modification-dependent protein binding                | GO_MolecularFunction-EBI-UniProt-GOA-ACAP-ARAP_08.05.2020_00h00 | 0,007459866 | 0,04378617 | 0,007459866 | 0,01081681 | [3]                         | Group18 | 6,25  | 10,00 |
| GO:0031593 | polyubiquitin modification-dependent protein binding  | GO_MolecularFunction-EBI-UniProt-GOA-ACAP-ARAP_08.05.2020_00h00 | 0,009784135 | 0,04832408 | 0,007459866 | 0,01081681 | [4]                         | Group18 | 9,62  | 5,00  |
